# Supplementary material for: Rapid Identification of Druggable Targets and the Power of the PHENotype SIMulator for Effective Drug Repurposing in COVID-19
Source: Res Sq. 2021 Apr 14:rs.3.rs-287183. Preprint. [Version 1] doi: 10.21203/rs.3.rs-287183/v1 (PMC8057245; doi:10.21203/rs.3.rs-287183/v1)
Supplement: Supplement [file 32fe505e21a6ed2d387df0b3.xlsx]

## Sheet: p-value analysis bojkova
Kegg ID	Pathway Name	In Bojkova et al	2h					6h					10h					24h
			Perturbation	p-Value				Perturbation	p-Value				Perturbation	p-Value				Perturbation	p-Value
				PHENSIM	Enrichment	Combined	FDR		PHENSIM	Enrichment	Combined	FDR		PHENSIM	Enrichment	Combined	FDR		PHENSIM	Enrichment	Combined	FDR
path:hsa00190	Oxidative phosphorylation	FALSE	0.0732593	0	0.321782	6.27453e-10	1.11149e-08	0.14696	0	0.855523	2.92591e-07	1.64915e-06	0.348018	0	0.197288	1.0916e-10	1.00266e-09	0.0533829	0.002	0.058938	0.000842129	0.00474654
path:hsa00072	Synthesis and degradation of ketone bodies	FALSE	-0.000209145	0.991	0.915758	0.995933	1	0.151969	0.003	0.00981281	0.000163472	0.000471408	0.0600905	0.002	0.317871	0.00889172	0.0175012	0.0310038	0.009	6.65148e-05	6.08709e-06	7.54799e-05
path:hsa01040	Biosynthesis of unsaturated fatty acids	FALSE	-0.014088	0.003	3.80156e-05	1.06492e-06	8.51934e-06	0.0788584	0.008	5.5825e-06	7.55093e-07	3.63681e-06	0.0786874	0.006	2.22207e-05	1.55413e-06	7.13749e-06	-0.014633	0.009	9.08084e-05	7.8135e-06	8.80794e-05
path:hsa04672	Intestinal immune network for IgA production	FALSE	0.0418555	0	0.987913	1.64932e-05	9.08957e-05	0.0762495	0	0.988871	1.81792e-05	6.44064e-05	0.0895868	0	0.93782	1.58689e-06	7.15543e-06	0.0170185	0.003	0.999963	0.805327	0.994353
path:hsa03460	Fanconi anemia pathway	FALSE	0	0.998	1	1	1	0.152499	0	0.897716	6.21041e-07	3.08037e-06	0.0894904	0	0.969221	4.84538e-06	2.0367e-05	-0.00244104	0.014	0.999245	0.754826	0.994353
path:hsa04310	Wnt signaling pathway	TRUE	-0.0766253	0.001	1	0.932067	1	0.136864	0.003	1	0.958498	0.985231	0.0523718	0.003	1	0.958498	0.974211	0.00875631	0.02	1	0.986935	0.994353
path:hsa00071	Fatty acid degradation	TRUE	-0.0235583	0.001	0.157746	0.00189644	0.00723565	0.111868	0.011	0.00294958	0.000180935	0.000515768	0.170543	0.009	0.132616	0.00693643	0.0138729	0.179093	0.023	5.4437e-08	1.19209e-07	2.46364e-06
path:hsa04670	Leukocyte transendothelial migration	FALSE	0.0866357	0.004	0.998654	0.59741	1	0.0393877	0.005	0.998766	0.625227	0.824494	0.128557	0.003	0.999405	0.636375	0.785179	0.146188	0.007	0.999987	0.892297	0.994353
path:hsa02010	ABC transporters	FALSE	0	1	1	1	1	0.0762495	0	0.15901	5.52129e-11	5.26646e-10	0.0596603	0	0.128941	2.95686e-11	2.93321e-10	0.0170185	0.003	0.45461	0.0215057	0.05926
path:hsa04550	Signaling pathways regulating pluripotency of stem cells	FALSE	0.00062048	0.965	1	1	1	0.1199	0.004	1	0.964164	0.985231	0.063127	0.002	1	0.949634	0.974211	0.032408	0.007	1	0.973746	0.994353
path:hsa00630	Glyoxylate and dicarboxylate metabolism	FALSE	0.105257	0.014	3.31763e-07	1.99671e-07	1.90455e-06	0.170377	0.018	4.91897e-09	1.53894e-08	1.06016e-07	0.363095	0.01	6.48123e-08	3.76466e-08	2.45694e-07	0.0682041	0.028	3.24302e-11	1.1849e-09	4.8976e-08
path:hsa00510	N-Glycan biosynthesis	FALSE	0.0371142	0.001	0.198719	0.00268894	0.00957913	0.0322665	0.002	0.0217782	0.000267745	0.000737018	0.439246	0.001	5.81815e-09	2.49931e-10	1.99945e-09	0.0417177	0.004	0.473498	0.0272837	0.0704828
path:hsa00750	Vitamin B6 metabolism	FALSE	0	0.998	1	1	1	0.101666	0.002	0.359268	0.0110101	0.0205301	0.0596603	0.002	0.529469	0.02369	0.0410848	0.00400642	0.005	0.0653209	0.00192479	0.00917976
path:hsa00513	Various types of N-glycan biosynthesis	FALSE	0	0.996	1	1	1	0.0847216	0.001	0.777877	0.0500717	0.0827853	0.104405	0.001	0.516846	0.0155709	0.0283939	-0.0115221	0.009	0.82538	0.156045	0.302477
path:hsa00514	Other types of O-glycan biosynthesis	FALSE	0	1	1	1	1	0.0762495	0	0.15901	5.52129e-11	5.26646e-10	0.0596603	0	0.128941	2.95686e-11	2.93321e-10	0.0170185	0.003	0.45461	0.0215057	0.05926
path:hsa00511	Other glycan degradation	FALSE	0	1	1	1	1	0.0762495	0	0.15901	5.52129e-11	5.26646e-10	0.0596603	0	0.128941	2.95686e-11	2.93321e-10	0.0170185	0.003	0.45461	0.0215057	0.05926
path:hsa00512	Mucin type O-glycan biosynthesis	FALSE	0.0523281	0.002	0.930331	0.161116	0.34745	0.23129	0.002	0.183316	0.00375273	0.0079545	0.162947	0.002	0.209518	0.00457262	0.00961025	0.0456239	0.003	0.906358	0.156117	0.302477
path:hsa00515	Mannose type O-glycan biosynthesis	FALSE	0.0156671	0.006	0.380361	0.0232025	0.0639357	0.0670025	0.003	0.195846	0.00540705	0.010902	0.0637744	0.004	0.131043	0.00381182	0.0083205	0.00775934	0.012	0.979748	0.441377	0.739605
path:hsa00520	Amino sugar and nucleotide sugar metabolism	TRUE	0.248842	0.009	0.000773612	4.59162e-05	0.000218985	0.0829276	0.009	6.87222e-06	1.03138e-06	4.65057e-06	0.17511	0.01	0.000301729	2.3467e-05	8.55857e-05	0.0333711	0.009	0.00612348	0.000286578	0.00173344
path:hsa00400	Phenylalanine, tyrosine and tryptophan biosynthesis	FALSE	0.0104656	0.004	0.843497	0.122644	0.274015	0.0717594	0.003	0.0257322	0.000449883	0.00117443	0.111117	0.007	0.000771715	3.49649e-05	0.000122131	0.0268768	0.006	0.22133	0.0101919	0.0388861
path:hsa00760	Nicotinate and nicotinamide metabolism	FALSE	-0.093135	0	0.0157068	1.83209e-13	1.1359e-11	0.138315	0.007	0.004215	0.000158919	0.000463669	0.0950561	0.008	0.0146655	0.000589003	0.00153761	0.00206655	0.029	0.186127	0.0243399	0.0662393
path:hsa00640	Propanoate metabolism	FALSE	-0.00493401	0	0.0295148	7.16258e-13	2.96053e-11	0.148397	0.018	0.000204192	3.41553e-05	0.000111454	0.185945	0.012	0.00380304	0.000247589	0.000713977	0.110678	0.02	0.00083862	0.000119372	0.000800118
path:hsa00524	Neomycin, kanamycin and gentamicin biosynthesis	FALSE	-0.0129309	0	0.613513	1.4962e-08	1.85529e-07	0.0853861	0.003	0.0462632	0.000866672	0.00214935	0.0639502	0.003	0.0309098	0.000550112	0.00145136	0.0433684	0.003	0.0818977	0.00170814	0.0086453
path:hsa04650	Natural killer cell mediated cytotoxicity	TRUE	-0.0374104	0.003	1	0.954878	1	0.0368256	0.011	1	0.970734	0.985231	0.101285	0.009	0.999999	0.952574	0.974211	-0.0315008	0.015	0.999997	0.952381	0.994353
path:hsa00051	Fructose and mannose metabolism	FALSE	0.0396977	0.009	0.0574378	0.00265496	0.00957913	0.0569311	0.007	0.0349527	0.00126724	0.00305121	0.148938	0.008	0.00726377	0.000300135	0.000845835	0.0597588	0.015	0.000531757	5.931e-05	0.000445724
path:hsa04530	Tight junction	FALSE	-0.0157106	0.003	0.999998	0.903264	1	0.105289	0.008	0.999999	0.953648	0.985231	0.141976	0.006	0.999996	0.914781	0.974211	0.152135	0.012	0.998593	0.697197	0.994353
path:hsa00290	Valine, leucine and isoleucine biosynthesis	FALSE	0	0.998	1	1	1	0.0774489	0.003	0.125904	0.00294993	0.00641738	0.061037	0	0.0925344	1.17044e-11	2.93321e-10	0.0170461	0.007	0.719719	0.0924186	0.199303
path:hsa00052	Galactose metabolism	FALSE	0.151687	0.007	1.55039e-05	1.4114e-06	1.06579e-05	0.159438	0.008	0.000172873	1.14965e-05	4.25541e-05	0.144464	0.006	0.000406791	1.70768e-05	6.41674e-05	0.0282181	0.014	9.25195e-06	2.30604e-06	3.1772e-05
path:hsa03320	PPAR signaling pathway	TRUE	-0.000461404	0.979	0.996124	0.999551	1	0.0502509	0.007	0.54938	0.049492	0.0823759	0.154299	0.002	0.835746	0.0894359	0.139498	0.0323061	0.013	0.745456	0.134083	0.268166
path:hsa00053	Ascorbate and aldarate metabolism	FALSE	0.0187013	0.005	1.04197e-07	1.98181e-08	2.34042e-07	-0.0229543	0	1.66474e-07	4.18849e-21	1.03875e-18	0.0648827	0.005	5.08625e-06	3.86262e-07	2.03815e-06	0.029262	0.013	2.23023e-05	4.08374e-06	5.33036e-05
path:hsa03440	Homologous recombination	FALSE	0	1	1	1	1	0.101666	0	0.839828	2.28925e-07	1.32031e-06	0.0298301	0	0.779379	9.89336e-08	5.8418e-07	0.0170185	0.003	0.998654	0.571039	0.900692
path:hsa04658	Th1 and Th2 cell differentiation	FALSE	-0.0291864	0.003	0.999997	0.897066	1	0.175374	0.006	0.999529	0.713055	0.92103	0.104726	0.004	0.999989	0.868498	0.970222	-0.00329079	0.033	1	0.991262	0.994353
path:hsa00730	Thiamine metabolism	FALSE	-5.05889e-05	0.987	0.198504	0.835286	1	0.111234	0.004	0.00170994	3.98725e-05	0.000125169	0.0690702	0.001	0.00982664	6.28498e-05	0.000210632	0.0668499	0.006	0.0024218	8.21308e-05	0.000599072
path:hsa04659	Th17 cell differentiation	FALSE	-0.0273521	0.004	1	0.964164	1	0.167703	0.009	0.999951	0.860358	0.985231	0.0846282	0.006	0.999981	0.872417	0.970222	0.0105489	0.029	1	0.990255	0.994353
path:hsa00970	Aminoacyl-tRNA biosynthesis	FALSE	-0.0147801	0.001	0.00381392	2.33291e-05	0.000123098	0.349258	0.016	7.19758e-06	2.28544e-06	9.14178e-06	0.705326	0.013	8.83455e-17	1.23947e-13	3.07388e-11	0.0829752	0.02	2.86987e-08	6.13276e-08	1.52092e-06
path:hsa04657	IL-17 signaling pathway	FALSE	-0.00697378	0.007	0.996799	0.575487	0.998372	0.11114	0	0.875506	4.09652e-07	2.20856e-06	0.0859341	0	0.952775	2.51751e-06	1.1149e-05	0.0150231	0.003	0.999782	0.706719	0.994353
path:hsa00061	Fatty acid biosynthesis	FALSE	-0.0115378	0.001	0.216368	0.00307324	0.0107347	0.168693	0.009	0.103101	0.00513529	0.0104389	0.075225	0.006	0.531645	0.0426976	0.0705933	0.0861337	0.015	0.643413	0.101233	0.212761
path:hsa03450	Non-homologous end-joining	FALSE	0	1	1	1	1	0.0762495	0	0.15901	5.52129e-11	5.26646e-10	0.0596603	0	0.128941	2.95686e-11	2.93321e-10	0.0170185	0.003	0.45461	0.0215057	0.05926
path:hsa04540	Gap junction	TRUE	-0.0141837	0.007	0.999813	0.781688	1	0.118483	0.008	0.999833	0.797536	0.969858	0.0540992	0.006	0.999879	0.793594	0.923996	0.143461	0.013	0.99094	0.538571	0.861714
path:hsa00062	Fatty acid elongation	FALSE	-0.00683795	0.001	5.10905e-06	5.62633e-08	6.06665e-07	0.168851	0.011	6.66918e-06	1.30965e-06	5.38001e-06	0.106789	0.012	0.0711137	0.00422246	0.00902733	0.168927	0.022	1.43909e-10	2.01901e-09	7.15305e-08
path:hsa04662	B cell receptor signaling pathway	FALSE	-0.0283855	0.007	0.999208	0.690124	1	0.127985	0.009	0.999858	0.814241	0.979136	0.112134	0.006	0.999139	0.670066	0.807987	0.0244328	0.011	1	0.980155	0.994353
path:hsa04664	Fc epsilon RI signaling pathway	FALSE	0.0531322	0.007	0.908848	0.213458	0.444853	0.123653	0.009	0.988424	0.473304	0.641417	0.0707469	0.007	0.994886	0.53121	0.682591	0.049093	0.013	0.999933	0.869773	0.994353
path:hsa04660	T cell receptor signaling pathway	FALSE	-0.0285441	0.007	0.999991	0.902697	1	0.124977	0.009	0.999994	0.92261	0.985231	0.111262	0.006	0.999846	0.780767	0.917851	0.00174047	0.027	1	0.989666	0.994353
path:hsa00740	Riboflavin metabolism	FALSE	0	1	1	1	1	0.0743432	0	0.0176268	2.33384e-13	1.92931e-11	0.137219	0	0.036953	1.19491e-12	9.87796e-11	0.0103698	0.004	0.749121	0.0807095	0.180324
path:hsa00982	Drug metabolism - cytochrome P450	FALSE	0.0150004	0.01	3.35882e-05	4.03056e-06	2.49895e-05	0.118457	0.01	3.95354e-06	7.77221e-07	3.63681e-06	0.0337463	0.006	0.000109131	5.6559e-06	2.26236e-05	-0.00837328	0.01	0.0235581	0.00114893	0.00633187
path:hsa00620	Pyruvate metabolism	FALSE	-0.0531022	0	0.0444563	1.84235e-12	6.52719e-11	0.260874	0.015	0.000244008	3.16253e-05	0.000105987	0.366163	0.012	0.00132566	9.91189e-05	0.000307268	0.0688405	0.027	3.13098e-05	1.3775e-05	0.000136648
path:hsa00983	Drug metabolism - other enzymes	FALSE	-0.0260402	0.001	6.46515e-07	1.02278e-08	1.335e-07	0.191706	0.013	0.00128997	0.000105591	0.000319348	0.104321	0.009	0.00130017	7.1727e-05	0.000234057	-0.0716844	0.007	1.18045e-05	1.13939e-06	1.88379e-05
path:hsa00980	Metabolism of xenobiotics by cytochrome P450	FALSE	0.0198304	0.007	5.84626e-13	6.69602e-12	2.07577e-10	0.185512	0.01	7.36414e-17	7.29473e-14	9.04546e-12	0.0158165	0.014	9.43488e-12	1.47301e-10	1.25968e-09	-0.0368014	0.006	1.49942e-11	4.70215e-11	2.91533e-09
path:hsa00860	Porphyrin and chlorophyll metabolism	FALSE	-0.0609072	0.001	0.00111472	6.88996e-06	4.06836e-05	0.0979135	0.01	0.00375083	0.000203443	0.000573339	0.269488	0.008	5.97482e-07	1.3928e-07	8.03289e-07	0.00197574	0.03	0.0492362	0.00623991	0.0253688
path:hsa04666	Fc gamma R-mediated phagocytosis	FALSE	-0.0688956	0.007	0.588656	0.0571575	0.140347	0.112333	0.012	0.753411	0.133182	0.201397	0.168345	0.01	0.719518	0.108628	0.165275	0.0928015	0.016	0.999232	0.765355	0.994353
path:hsa00500	Starch and sucrose metabolism	FALSE	-0.0513519	0	0.0981172	1.37189e-11	3.58368e-10	0.160646	0.004	0.0056334	0.00012255	0.000366173	0.143676	0.003	0.00564658	9.4072e-05	0.000295314	0.0878246	0.004	0.0178694	0.000389515	0.00229999
path:hsa04668	TNF signaling pathway	FALSE	0.0394549	0.004	0.996381	0.509493	0.922293	0.134231	0.005	0.999153	0.654794	0.854679	0.084727	0.003	0.999195	0.613019	0.760144	-0.010763	0.028	1	0.989969	0.994353
path:hsa04070	Phosphatidylinositol signaling system	FALSE	0.0697075	0.008	0.13166	0.00631003	0.0211471	0.125152	0.012	0.107178	0.00667997	0.0133599	0.102245	0.009	0.0850539	0.00411125	0.00886599	0.0654214	0.016	0.998085	0.701441	0.994353
path:hsa04071	Sphingolipid signaling pathway	FALSE	-0.00270042	0.019	0.999683	0.828597	1	0.0473724	0.011	0.999928	0.857151	0.985231	0.186956	0.01	0.999345	0.734803	0.87192	0.0295988	0.014	1	0.983113	0.994353
path:hsa04072	Phospholipase D signaling pathway	FALSE	0.0121493	0.019	0.996184	0.662534	1	0.10925	0.015	0.999862	0.850221	0.985231	0.0863092	0.01	0.997894	0.647537	0.79108	0.0690223	0.016	0.999999	0.968969	0.994353
path:hsa00270	Cysteine and methionine metabolism	FALSE	-0.111944	0.001	0.863315	0.0791804	0.187017	0.306973	0.007	0.0895569	0.00359905	0.00774224	0.306393	0.01	0.00621485	0.000321809	0.000896727	0.0286819	0.01	0.766954	0.129322	0.260935
path:hsa04750	Inflammatory mediator regulation of TRP channels	FALSE	0.111189	0.01	0.830835	0.166536	0.356043	0.14144	0.011	0.894319	0.230935	0.334923	0.186226	0.009	0.837481	0.164324	0.244026	0.0112252	0.029	0.922418	0.368703	0.639429
path:hsa04630	JAK-STAT signaling pathway	FALSE	0.00062004	0.969	1	1	1	0.121733	0.004	1	0.964164	0.985231	0.0629566	0.002	1	0.949634	0.974211	0.0230726	0.005	1	0.968209	0.994353
path:hsa04510	Focal adhesion	TRUE	0.144748	0.004	0.999991	0.875642	1	0.379135	0.006	0.999988	0.886864	0.985231	0.243671	0.003	0.999994	0.877696	0.971735	0.170052	0.009	1	0.977451	0.994353
path:hsa03420	Nucleotide excision repair	FALSE	0	1	1	1	1	0.0762495	0	0.15901	5.52129e-11	5.26646e-10	0.0596603	0	0.128941	2.95686e-11	2.93321e-10	0.0170185	0.003	0.45461	0.0215057	0.05926
path:hsa00030	Pentose phosphate pathway	FALSE	0.0106713	0.01	3.01397e-05	3.70276e-06	2.35458e-05	0.317548	0.005	4.67217e-12	1.55562e-11	5.26646e-10	0.248014	0.004	0.000220623	6.49895e-06	2.55832e-05	0.0694689	0.013	2.10968e-08	2.51686e-08	7.80225e-07
path:hsa04512	ECM-receptor interaction	FALSE	0.0837249	0	0.999774	0.000545612	0.00225519	0.337257	0.002	0.977299	0.267526	0.383505	0.119321	0	0.999978	0.00212725	0.00496584	0.0765089	0.003	1	0.954022	0.994353
path:hsa00830	Retinol metabolism	FALSE	0.0116999	0.011	0.0488398	0.00263011	0.00957913	0.00726487	0.012	0.0177809	0.00102704	0.00249711	0.189315	0.008	9.19121e-06	1.1095e-06	5.29146e-06	0.0615954	0.013	0.069082	0.00436346	0.0189849
path:hsa04514	Cell adhesion molecules (CAMs)	TRUE	0.0107828	0.001	0.999993	0.815316	1	0.103341	0.003	0.999999	0.922466	0.985231	0.0597205	0.001	1	0.932067	0.974211	-0.0126835	0.011	1	0.980155	0.994353
path:hsa04080	Neuroactive ligand-receptor interaction	FALSE	0.011904	0.038	0.99908	0.828431	1	0.135726	0.02	0.999935	0.894977	0.985231	0.223807	0.016	0.999598	0.803282	0.929493	0.0139051	0.053	1	0.994353	0.994353
path:hsa00040	Pentose and glucuronate interconversions	FALSE	0.0952519	0.006	1.02751e-08	4.69714e-09	6.8523e-08	0.048895	0.009	4.14526e-10	9.0579e-10	7.01987e-09	0.0898468	0.009	1.79799e-07	6.77139e-08	4.09586e-07	-0.0130411	0.011	1.37302e-07	7.43637e-08	1.67656e-06
path:hsa04640	Hematopoietic cell lineage	FALSE	0	1	1	1	1	0.0762495	0	0.15901	5.52129e-11	5.26646e-10	0.0596603	0	0.128941	2.95686e-11	2.93321e-10	0.0170185	0.003	0.45461	0.0215057	0.05926
path:hsa04520	Adherens junction	FALSE	0.104815	0.002	0.999999	0.919153	1	0.13186	0.004	0.999989	0.869034	0.985231	0.185446	0.002	0.999999	0.906454	0.974211	0.0703603	0.004	1	0.964164	0.994353
path:hsa00280	Valine, leucine and isoleucine degradation	FALSE	-0.045455	0	0.393637	1.4542e-09	2.40428e-08	0.137633	0.01	0.0317527	0.00155269	0.00363271	0.211473	0.006	0.0503961	0.00165844	0.00399314	0.0988262	0.019	0.000591637	8.48863e-05	0.00060148
path:hsa03430	Mismatch repair	FALSE	0	1	1	1	1	0.0762495	0	0.15901	5.52129e-11	5.26646e-10	0.0596603	0	0.128941	2.95686e-11	2.93321e-10	0.0170185	0.003	0.45461	0.0215057	0.05926
path:hsa00601	Glycosphingolipid biosynthesis - lacto and neolacto series	FALSE	0	1	1	1	1	0.0762495	0	0.998586	0.000139234	0.000411072	0.0596603	0	0.996692	6.52108e-05	0.00021563	0.0170185	0.003	0.999999	0.932347	0.994353
path:hsa00600	Sphingolipid metabolism	FALSE	-0.0488588	0	6.569e-06	5.36174e-19	6.64856e-17	0.00979672	0.015	1.11711e-05	2.91188e-06	1.111e-05	0.0849977	0.008	7.18653e-05	5.62756e-06	2.26236e-05	0.0446232	0.012	0.0351161	0.00201257	0.00941731
path:hsa00603	Glycosphingolipid biosynthesis - globo and isoglobo series	FALSE	0	0.999	1	1	1	0.0762495	0	0.888079	5.15142e-07	2.60725e-06	0.0894904	0.001	0.676017	0.0312827	0.0527763	0.000369778	0.98	0.888454	0.989658	0.994353
path:hsa00604	Glycosphingolipid biosynthesis - ganglio series	FALSE	0.0418625	0	0.937123	1.55629e-06	1.10274e-05	0.0762495	0	0.92505	1.13528e-06	4.78572e-06	0.0894904	0.001	0.752859	0.0443958	0.0729149	0.00923466	0.004	0.991963	0.431282	0.732588
path:hsa04970	Salivary secretion	FALSE	0.0998429	0.006	0.358703	0.0210629	0.058692	0.0919141	0.006	0.551856	0.0460732	0.0772038	0.136088	0.005	0.20053	0.00786407	0.0156023	0.0390121	0.009	0.361935	0.0272678	0.0704828
path:hsa04971	Gastric acid secretion	FALSE	0.106279	0.006	0.422898	0.027818	0.0742974	0.0792336	0.006	0.528943	0.0422629	0.0722841	0.140901	0.005	0.279801	0.0127437	0.0239427	0.081827	0.013	0.303986	0.0263791	0.0703443
path:hsa04730	Long-term depression	FALSE	-0.0273107	0.001	0.979204	0.228336	0.471894	0.130713	0.008	0.977847	0.389265	0.548509	0.0520995	0.007	0.996492	0.567059	0.713161	0.103673	0.019	0.943497	0.364481	0.636559
path:hsa04972	Pancreatic secretion	FALSE	-0.0249431	0	0.915171	8.9943e-07	7.43529e-06	0.0918281	0.006	0.661026	0.0690747	0.11052	0.0496223	0.005	0.821438	0.120952	0.181794	0.0630102	0.009	0.917379	0.244618	0.442811
path:hsa00010	Glycolysis / Gluconeogenesis	TRUE	-0.0166724	0	0.000386437	2.26652e-16	1.87365e-14	0.249261	0.02	5.38131e-06	2.50489e-06	9.70646e-06	0.27671	0.017	0.000279877	4.09247e-05	0.000140963	0.138723	0.03	9.2643e-09	5.55562e-08	1.52092e-06
path:hsa01100	Metabolic pathways	TRUE	0.472643	0.1	6.05875e-38	1.44503e-11	3.58368e-10	1.9006	0.102	2.59133e-43	1.52573e-11	5.26646e-10	3.0838	0.097	7.86604e-35	1.32975e-11	2.93321e-10	0.289956	0.141	9.00319e-34	3.84343e-11	2.91533e-09
path:hsa00250	Alanine, aspartate and glutamate metabolism	FALSE	-0.128621	0.001	0.00816726	5.15585e-05	0.000236787	0.202866	0.018	2.30505e-07	2.23357e-07	1.31887e-06	0.272321	0.021	6.05235e-07	5.5756e-07	2.7655e-06	0.0385429	0.028	1.4813e-05	8.37148e-06	9.02664e-05
path:hsa00130	Ubiquinone and other terpenoid-quinone biosynthesis	FALSE	0.0732593	0.004	0.478628	0.0278615	0.0742974	0.0700347	0.002	0.680265	0.044197	0.0750743	0.0607416	0.003	0.398208	0.0167767	0.0303694	-0.0104237	0.009	0.0403191	0.00181841	0.00901933
path:hsa04614	Renin-angiotensin system	FALSE	0.0418625	0	0.75001	6.86164e-08	7.09036e-07	0.0762495	0	0.666859	2.65019e-08	1.77635e-07	0.0596603	0	0.600369	1.30287e-08	8.97534e-08	0.0170185	0.003	0.948685	0.215111	0.40067
path:hsa04977	Vitamin digestion and absorption	FALSE	0	0.998	1	1	1	0.0762495	0.001	0.400423	0.00905177	0.0175378	0.08253	0.002	0.145329	0.00269832	0.00608348	0.0165278	0.007	0.577485	0.0548733	0.126005
path:hsa04978	Mineral absorption	FALSE	-0.0379116	0	0.991601	2.50563e-05	0.000127456	0.0912925	0.002	0.724156	0.053234	0.0868555	0.0482687	0.002	0.803596	0.0762265	0.119647	0.0530195	0.007	0.732369	0.0969468	0.207266
path:hsa04979	Cholesterol metabolism	TRUE	0	1	1	1	1	0.127082	0	0.908265	7.72536e-07	3.63681e-06	0	1	0.85784	0.999995	0.999995	0.0157212	0.003	0.516875	0.0278705	0.0712565
path:hsa04610	Complement and coagulation cascades	FALSE	-0.0418625	0	0.99767	9.02061e-05	0.000406748	0.101666	0	0.993527	3.32417e-05	0.000109919	0.0298301	0	0.911461	8.28042e-07	4.02656e-06	0.00923466	0.003	0.999864	0.736194	0.994353
path:hsa04973	Carbohydrate digestion and absorption	FALSE	-0.00468826	0.014	0.498347	0.0597772	0.145341	0.109502	0.012	0.477185	0.0508683	0.0835452	0.105718	0.009	0.341302	0.0248877	0.0428621	0.0453607	0.011	0.9898	0.508055	0.834234
path:hsa04611	Platelet activation	FALSE	0.0674148	0.01	0.728141	0.112065	0.254973	0.300769	0.011	0.821465	0.166443	0.248662	0.268032	0.009	0.955105	0.318059	0.438215	0.149922	0.018	0.991493	0.581091	0.900692
path:hsa04974	Protein digestion and absorption	FALSE	0	1	1	1	1	0.0762495	0	0.276825	3.53102e-10	2.91897e-09	0.0596603	0	0.230581	1.84076e-10	1.5217e-09	0.0170185	0.003	0.646698	0.0467904	0.111577
path:hsa04612	Antigen processing and presentation	TRUE	0	1	1	1	1	0.050833	0	0.999371	0.000264947	0.000737018	0.0596603	0	0.99963	0.000389928	0.00107447	-0.0311684	0.004	0.763079	0.0855252	0.187701
path:hsa04975	Fat digestion and absorption	FALSE	-0.0015435	0.001	0.225747	0.00328862	0.0113275	0.0630757	0.004	0.0373488	0.00085756	0.00214823	0.0597164	0.003	0.0683211	0.00137024	0.00336455	0.0233972	0.008	0.0954749	0.00429321	0.0189849
path:hsa04976	Bile secretion	FALSE	0.0129684	0.002	0.989641	0.344738	0.664093	0.0827044	0	0.925147	1.13799e-06	4.78572e-06	0.0907879	0	0.880439	4.47375e-07	2.31144e-06	0.0115422	0.009	0.99352	0.533597	0.859299
path:hsa04060	Cytokine-cytokine receptor interaction	FALSE	0.0417036	0	1	0.019255	0.054264	0.0848416	0	0.999999	0.00835746	0.0163201	0.0958951	0	0.999993	0.003712	0.00821942	0.0197989	0.001	1	0.932067	0.994353
path:hsa04061	Viral protein interaction with cytokine and cytokine receptor	FALSE	0.0417036	0	0.984418	1.21027e-05	6.82151e-05	0.0835535	0	0.991549	2.48857e-05	8.57175e-05	0.0957248	0	0.953945	2.62121e-06	1.14046e-05	0.00925897	0.004	1	0.964164	0.994353
path:hsa04062	Chemokine signaling pathway	FALSE	0.0367816	0.008	0.99644	0.579102	0.998372	0.157961	0.009	0.999841	0.808734	0.978371	0.179575	0.007	0.999103	0.680929	0.815799	0.0636236	0.033	1	0.991262	0.994353
path:hsa00380	Tryptophan metabolism	FALSE	0.100846	0.01	1.87532e-05	2.55888e-06	1.71514e-05	0.221817	0.009	1.29344e-07	5.32517e-08	3.38626e-07	0.105207	0.009	0.00132561	7.29425e-05	0.000234932	0.0482939	0.022	0.129049	0.0130795	0.0484137
path:hsa00260	Glycine, serine and threonine metabolism	FALSE	0.0238876	0.008	0.468023	0.0391955	0.0991887	0.212845	0.012	0.000145823	1.60802e-05	5.77955e-05	0.172867	0.008	0.0260992	0.00104827	0.00265277	-0.0252427	0.007	0.000576652	2.72112e-05	0.000241013
path:hsa04068	FoxO signaling pathway	FALSE	-0.0589723	0.012	0.999999	0.956727	1	0.245298	0.017	1	0.985274	0.985274	0.28866	0.013	0.999998	0.952854	0.974211	0.0284169	0.023	1	0.98826	0.994353
path:hsa04740	Olfactory transduction	FALSE	0.0864064	0.004	1	0.964164	1	0.0851161	0.004	1	0.964164	0.985231	0.134594	0.003	1	0.958498	0.974211	-0.0061895	0.014	1	0.983113	0.994353
path:hsa04620	Toll-like receptor signaling pathway	TRUE	-0.00108359	0.025	0.988058	0.583726	0.998372	0.153472	0.004	0.999081	0.628344	0.824494	0.09118	0.002	0.997591	0.483294	0.634163	-0.00317512	0.037	1	0.992093	0.994353
path:hsa03410	Base excision repair	FALSE	0	1	1	1	1	0.0762495	0	0.15901	5.52129e-11	5.26646e-10	0.0596603	0	0.128941	2.95686e-11	2.93321e-10	0.0170185	0.003	0.45461	0.0215057	0.05926
path:hsa04064	NF-kappa B signaling pathway	FALSE	-0.00705668	0.005	0.999978	0.857606	1	0.165274	0	0.999986	0.00266779	0.00590725	0.144762	0	0.999997	0.0053099	0.0108831	0.0221304	0.001	1	0.932067	0.994353
path:hsa00140	Steroid hormone biosynthesis	FALSE	0.0155001	0.009	3.35775e-05	3.53823e-06	2.30916e-05	0.0344544	0.007	0.000377077	1.89553e-05	6.62102e-05	0.105657	0.007	3.82806e-06	4.75407e-07	2.40614e-06	0.00200507	0.029	0.000169757	5.35075e-05	0.000432562
path:hsa00020	Citrate cycle (TCA cycle)	TRUE	0.0549558	0.006	0.0450524	0.00146594	0.00568053	0.235601	0.01	6.42652e-06	1.12373e-06	4.78572e-06	0.418006	0.008	6.78808e-05	5.37491e-06	2.22163e-05	0.174737	0.019	1.07157e-06	7.23456e-07	1.28155e-05
path:hsa01230	Biosynthesis of amino acids	FALSE	-0.0166709	0.005	0.0147405	0.000388651	0.00166182	0.539627	0.018	1.584e-08	3.43787e-08	2.24366e-07	0.534299	0.021	2.07046e-06	1.34243e-06	6.28157e-06	0.163707	0.035	4.4338e-14	2.80192e-11	2.91533e-09
path:hsa04066	HIF-1 signaling pathway	TRUE	-0.0669852	0.011	0.999294	0.738119	1	0.201717	0.015	0.999892	0.860223	0.985231	0.0842886	0.015	0.999997	0.95283	0.974211	0.142095	0.016	1	0.98462	0.994353
path:hsa04625	C-type lectin receptor signaling pathway	FALSE	0.146627	0.009	0.992903	0.524446	0.942482	0.156283	0.01	0.999862	0.823008	0.979136	0.172427	0.008	0.992573	0.507613	0.659099	0.0502318	0.011	0.999996	0.936879	0.994353
path:hsa04621	NOD-like receptor signaling pathway	FALSE	-0.0927509	0.003	0.992641	0.41365	0.765562	0.245138	0.006	0.999722	0.74678	0.944905	0.0818485	0.004	0.999911	0.780914	0.917851	0.0727857	0.012	1	0.971165	0.994353
path:hsa04742	Taste transduction	FALSE	-0.0606265	0.001	0.0299593	0.000219488	0.00097202	0.126645	0.021	0.00320165	0.000381668	0.00100695	0.180059	0.018	0.00252985	0.000265195	0.000755959	0.0420681	0.031	0.010378	0.00156447	0.00825505
path:hsa04622	RIG-I-like receptor signaling pathway	FALSE	0.0331444	0	0.999898	0.000907582	0.00368984	0.119764	0	0.999388	0.000270438	0.000737018	0.20319	0	0.997776	9.40612e-05	0.000295314	-0.00871122	0.02	1	0.984183	0.994353
path:hsa04623	Cytosolic DNA-sensing pathway	FALSE	-0.00882168	0.008	0.874925	0.18668	0.395698	0.113958	0	0.743683	6.35772e-08	3.94179e-07	0.148952	0	0.497307	4.44515e-09	3.24235e-08	0.012814	0.003	0.999988	0.851696	0.994353
path:hsa04744	Phototransduction	FALSE	0.0873425	0.005	0.20203	0.00794591	0.025592	0.0786414	0.005	0.399377	0.0226601	0.0390258	0.143327	0.005	0.00496332	0.000133919	0.000410022	0.0154321	0.052	0.159885	0.0319332	0.0808106
path:hsa04390	Hippo signaling pathway	FALSE	0.0550951	0.002	1	0.949634	1	0.0770083	0.002	1	0.949634	0.985231	0.148978	0.002	1	0.949634	0.974211	0.0238402	0.003	1	0.958498	0.994353
path:hsa04270	Vascular smooth muscle contraction	FALSE	0.146379	0.012	0.190082	0.0133258	0.04131	0.156381	0.009	0.205899	0.0121267	0.0224435	0.17779	0.009	0.550133	0.0566366	0.091207	0.0239378	0.014	0.089416	0.00613432	0.0253552
path:hsa04150	mTOR signaling pathway	TRUE	-0.103916	0.008	1	0.971391	1	0.206568	0.01	1	0.978898	0.985231	0.200446	0.007	0.998766	0.656558	0.798168	-0.0625025	0.018	1	0.985873	0.994353
path:hsa04392	Hippo signaling pathway - multiple species	FALSE	0.0418625	0	0.99179	2.56968e-05	0.000127456	0.050833	0.001	0.975286	0.213092	0.312703	0.0596603	0	0.986289	1.41723e-05	5.40729e-05	-0.0047591	0.019	0.987038	0.542937	0.863131
path:hsa03060	Protein export	FALSE	0	1	1	1	1	0.0762495	0	0.15901	5.52129e-11	5.26646e-10	0.0596603	0	0.128941	2.95686e-11	2.93321e-10	0.0170185	0.003	0.45461	0.0215057	0.05926
path:hsa00590	Arachidonic acid metabolism	FALSE	0.041517	0.005	0.70346	0.0744364	0.177502	0.114543	0.004	0.691146	0.063957	0.103669	0.17279	0.003	0.727903	0.0649968	0.102712	0.0465913	0.017	0.561501	0.0823139	0.182267
path:hsa00230	Purine metabolism	TRUE	-0.282605	0.001	8.47561e-09	3.33778e-10	6.89807e-09	0.628908	0.013	1.96458e-11	2.10779e-10	1.93605e-09	0.55666	0.01	9.57998e-07	2.68942e-07	1.44995e-06	0.044018	0.013	4.62407e-05	7.16919e-06	8.46647e-05
path:hsa00472	D-Arginine and D-ornithine metabolism	FALSE	0	1	1	1	1	0.0762495	0	0.307761	5.27081e-10	4.21665e-09	0.0596603	0	0.257996	2.73199e-10	2.1173e-09	0.0170185	0.003	0.686462	0.0548625	0.126005
path:hsa04151	PI3K-Akt signaling pathway	FALSE	0.0414307	0.011	1	0.980155	1	0.351895	0.012	1	0.981258	0.985231	0.264313	0.01	1	0.978898	0.986857	0.127272	0.038	1	0.992278	0.994353
path:hsa04152	AMPK signaling pathway	FALSE	-0.0985128	0.007	0.977335	0.373646	0.70736	0.136442	0.01	0.999342	0.734526	0.934167	0.174902	0.007	0.987031	0.435372	0.577392	0.0324003	0.012	0.999963	0.886577	0.994353
path:hsa00591	Linoleic acid metabolism	FALSE	0.0420286	0.004	0.00207408	4.76339e-05	0.000222891	0.11141	0.003	0.00575443	9.58418e-05	0.000293442	0.0636039	0.003	0.0444435	0.000827673	0.00211611	0.0421963	0.006	0.0496408	0.00163097	0.00842666
path:hsa00350	Tyrosine metabolism	FALSE	0.138273	0.009	0.459675	0.0405498	0.101579	0.111998	0.012	0.270671	0.0212841	0.0371723	0.295887	0.009	0.104559	0.00522055	0.0107891	0.000301922	0.922	0.0683632	0.480419	0.794294
path:hsa00471	D-Glutamine and D-glutamate metabolism	FALSE	-0.00295055	0.003	0.354414	0.013656	0.0417542	0.0815771	0.005	0.0548542	0.00157653	0.00365402	0.0597174	0.003	0.105768	0.00235372	0.00540483	0.0064881	0.012	0.204475	0.0146317	0.0525894
path:hsa00592	alpha-Linolenic acid metabolism	FALSE	0.0420286	0.004	0.00104726	2.55318e-05	0.000127456	0.140006	0.006	1.81615e-05	1.32331e-06	5.38001e-06	0.0635621	0.003	0.0281191	0.00049567	0.00132179	0.0522782	0.011	0.000724155	5.40703e-05	0.000432562
path:hsa04713	Circadian entrainment	FALSE	0.0888069	0.007	0.947025	0.276126	0.561305	0.0892674	0.005	0.9916	0.448028	0.617283	0.167812	0.005	0.813789	0.116888	0.176758	0.0212207	0.03	0.998578	0.782351	0.994353
path:hsa04714	Thermogenesis	FALSE	-0.000895512	0.961	0.994844	0.998894	1	0.120348	0.004	0.993017	0.445466	0.617283	0.0631012	0.003	0.99349	0.425805	0.570809	0.0028245	0.041	0.977821	0.57612	0.900692
path:hsa00232	Caffeine metabolism	FALSE	0	1	1	1	1	0.0762495	0	0.59667	1.25326e-08	8.88025e-08	0.0596603	0	0.529469	6.21971e-09	4.40711e-08	0.0170185	0.003	0.919458	0.170545	0.322864
path:hsa01200	Carbon metabolism	TRUE	0.0963748	0.025	1.34565e-07	2.54125e-07	2.33419e-06	0.584989	0.028	2.81724e-15	3.09658e-12	1.91988e-10	0.735884	0.025	8.10634e-08	1.79136e-07	1.00968e-06	0.326762	0.045	1.01276e-26	1.89633e-12	4.7029e-10
path:hsa00910	Nitrogen metabolism	FALSE	-0.0238817	0.001	0.831888	0.066145	0.159262	0.131446	0.008	0.0470388	0.00194314	0.0043809	0.071873	0.003	0.00982664	0.000163706	0.000483324	-0.00211225	0.016	0.0413314	0.00303969	0.0139601
path:hsa04710	Circadian rhythm	FALSE	0	1	1	1	1	0.101666	0	0.98489	1.25758e-05	4.58648e-05	0.0596603	0	0.991635	2.51693e-05	9.04637e-05	-0.025309	0.007	0.993951	0.514668	0.834234
path:hsa00480	Glutathione metabolism	FALSE	-0.061972	0.002	9.06845e-05	1.41819e-06	1.06579e-05	0.308885	0.013	8.75263e-07	3.62887e-07	1.99991e-06	0.00699737	0.008	0.000311325	1.87178e-05	6.92837e-05	-0.0359279	0.009	0.000268705	1.89181e-05	0.000180449
path:hsa04960	Aldosterone-regulated sodium reabsorption	FALSE	0.000342146	0.989	0.999342	0.99995	1	0.0783044	0.005	0.997463	0.563602	0.755531	0.068418	0.003	0.993199	0.421473	0.570809	0.0477654	0.008	0.999948	0.850985	0.994353
path:hsa04961	Endocrine and other factor-regulated calcium reabsorption	FALSE	-0.0378816	0	0.99077	2.25433e-05	0.000121538	0.0854952	0.007	0.917172	0.224438	0.327416	0.0483471	0.006	0.929747	0.231431	0.329855	0.0656359	0.01	0.848451	0.179627	0.33748
path:hsa00120	Primary bile acid biosynthesis	FALSE	0.0627746	0.005	0.816904	0.118519	0.267206	0.0465969	0.002	0.943345	0.179972	0.267264	0.0596603	0.002	0.98836	0.333275	0.456641	0.00443477	0.013	0.998811	0.717117	0.994353
path:hsa01210	2-Oxocarboxylic acid metabolism	FALSE	0.0596156	0.006	0.273245	0.0138058	0.0417542	0.103433	0.008	0.195071	0.0104159	0.0196923	0.176162	0.012	0.0649107	0.00382475	0.0083205	0.079653	0.016	0.0258813	0.00191568	0.00917976
path:hsa00360	Phenylalanine metabolism	FALSE	0.0523281	0.004	0.757968	0.0837201	0.195873	0.0713878	0.005	0.117955	0.00391283	0.00822358	0.148089	0.007	0.0327959	0.00118495	0.00296837	0.0177323	0.015	0.789272	0.167011	0.318606
path:hsa00240	Pyrimidine metabolism	TRUE	-0.096718	0	3.38247e-11	1.87902e-25	4.65996e-23	0.20933	0.012	0.000432703	3.88492e-05	0.000123521	0.13644	0.008	1.16054e-07	4.15584e-08	2.64269e-07	-0.0946207	0.006	6.38016e-10	6.44486e-10	3.19665e-08
path:hsa04724	Glutamatergic synapse	FALSE	-0.0505491	0.003	0.580018	0.0359159	0.0937594	0.129412	0.012	0.586342	0.0746823	0.117969	0.0827856	0.009	0.719596	0.103571	0.159437	0.0533536	0.037	0.764628	0.225631	0.414382
path:hsa04966	Collecting duct acid secretion	FALSE	0	1	1	1	1	0.0762495	0	0.276825	3.53102e-10	2.91897e-09	0.070817	0	0.0206366	3.26534e-13	4.04902e-11	0.0144702	0.003	0.202926	0.00569121	0.0239224
path:hsa04725	Cholinergic synapse	FALSE	-0.0256109	0.007	0.995463	0.54279	0.968432	0.105984	0.009	0.999301	0.721259	0.922021	0.080656	0.007	0.996294	0.561935	0.71102	0.112732	0.032	0.999995	0.966231	0.994353
path:hsa04726	Serotonergic synapse	FALSE	-0.0274454	0.001	0.999709	0.597525	1	0.123805	0.007	0.999719	0.758566	0.950123	0.0817775	0.005	0.999936	0.812358	0.932708	0.0769211	0.036	0.998085	0.780152	0.994353
path:hsa01212	Fatty acid metabolism	FALSE	-0.0196047	0.001	0.35886	0.00732843	0.0239138	0.205983	0.011	0.0796469	0.00446461	0.00922686	0.134751	0.012	0.974077	0.412496	0.562082	0.195922	0.02	0.00126242	0.000166658	0.00105977
path:hsa04727	GABAergic synapse	FALSE	0.000482519	0.974	0.982331	0.997896	1	0.0816753	0.003	0.904859	0.154614	0.232389	0.0917824	0.002	0.738225	0.0565837	0.091207	0.0492634	0.032	0.816853	0.251154	0.45135
path:hsa00920	Sulfur metabolism	FALSE	0.050235	0	0.492933	4.24579e-09	6.58097e-08	0.0747604	0.001	0.239597	0.00362137	0.00774224	0.0620747	0	0.184072	8.72602e-11	8.32328e-10	0.0723883	0.004	0.00247275	5.60785e-05	0.000434608
path:hsa04720	Long-term potentiation	FALSE	0.0939209	0.01	0.956668	0.332321	0.648941	0.100479	0.011	0.992719	0.543006	0.731878	0.166467	0.008	0.882981	0.194375	0.283558	-0.0213886	0.015	0.665654	0.108996	0.227152
path:hsa04962	Vasopressin-regulated water reabsorption	FALSE	-0.00128974	0.001	0.779906	0.0505728	0.125421	0.0829019	0.001	0.371655	0.00783134	0.0154141	0.059045	0.001	0.427151	0.0103073	0.0198155	0.0157456	0.009	0.773276	0.126594	0.260935
path:hsa04721	Synaptic vesicle cycle	FALSE	-0.0379116	0	0.968208	4.62223e-06	2.79589e-05	0.104001	0.002	0.438308	0.0159783	0.0293527	0.0482687	0.002	0.563932	0.027343	0.046766	0.0700278	0.005	0.207757	0.00826197	0.0325233
path:hsa04722	Neurotrophin signaling pathway	FALSE	0.0768964	0.009	0.99996	0.867677	1	0.0886529	0.01	1	0.978898	0.985231	0.191387	0.008	0.999905	0.825084	0.941666	-0.00129932	0.042	1	0.992949	0.994353
path:hsa04964	Proximal tubule bicarbonate reclamation	FALSE	-0.00317799	0.001	0.890139	0.0938666	0.21756	0.0941017	0.005	0.142821	0.00499196	0.0102315	0.154055	0.004	0.0107659	0.000232106	0.000677203	0.010768	0.012	0.204475	0.0146317	0.0525894
path:hsa04723	Retrograde endocannabinoid signaling	FALSE	-0.153708	0.003	0.97489	0.288286	0.580607	0.176685	0.011	0.984738	0.464185	0.63601	0.0519233	0.008	0.995213	0.551172	0.700978	0.0735104	0.035	0.922332	0.391096	0.668908
path:hsa04728	Dopaminergic synapse	FALSE	0.0958858	0.01	0.976866	0.406811	0.758564	0.0953271	0.007	0.999479	0.719433	0.922021	0.249404	0.008	0.882574	0.193972	0.283558	0.020667	0.034	0.999256	0.830472	0.994353
path:hsa04370	VEGF signaling pathway	FALSE	-0.01638	0.021	0.929371	0.345435	0.664093	0.174858	0.011	0.968152	0.37891	0.536969	0.0635108	0.01	0.988023	0.48069	0.634101	0.028315	0.013	0.99994	0.873823	0.994353
path:hsa04012	ErbB signaling pathway	FALSE	0.0634392	0.004	0.999994	0.887124	1	0.110717	0.006	1	0.959944	0.985231	0.0706034	0.004	0.999996	0.897028	0.974211	0.0238064	0.009	1	0.977451	0.994353
path:hsa04014	Ras signaling pathway	TRUE	0.138636	0.012	0.999598	0.780469	1	0.130133	0.013	0.999973	0.900251	0.985231	0.235343	0.009	0.999774	0.790426	0.923996	0.121576	0.035	1	0.991696	0.994353
path:hsa03040	Spliceosome	FALSE	0	1	1	1	1	0.0762495	0	0.15901	5.52129e-11	5.26646e-10	0.0596603	0	0.128941	2.95686e-11	2.93321e-10	0.0170185	0.003	0.45461	0.0215057	0.05926
path:hsa04015	Rap1 signaling pathway	FALSE	0.111476	0.011	0.999998	0.948236	1	0.167712	0.012	1	0.981258	0.985231	0.203771	0.008	0.999998	0.937748	0.974211	0.118567	0.015	1	0.982937	0.994353
path:hsa04136	Autophagy - other	FALSE	0.0436129	0.002	0.641763	0.037672	0.096316	0.102046	0.003	0.455908	0.0216251	0.0375037	0.0838779	0.002	0.344861	0.0102391	0.0198155	0.0543363	0.01	0.808203	0.151769	0.298719
path:hsa00450	Selenocompound metabolism	TRUE	0.0209382	0.002	0.416187	0.0144506	0.0431777	0.143154	0.002	0.094061	0.00150934	0.00356491	0.0802489	0.003	0.0248181	0.000432539	0.00117879	0.0415696	0.001	0.64181	0.0269131	0.0704828
path:hsa04371	Apelin signaling pathway	FALSE	0.0640502	0.01	0.995592	0.581994	0.998372	0.117252	0.008	0.99998	0.884612	0.985231	0.169788	0.009	0.998113	0.646297	0.79108	0.115369	0.037	0.999028	0.823222	0.994353
path:hsa00330	Arginine and proline metabolism	FALSE	-0.0700105	0.002	0.282575	0.00730506	0.0239138	0.133751	0.016	0.126246	0.0100231	0.019121	0.19855	0.014	0.0650137	0.00434173	0.00920297	0.0134438	0.035	0.064987	0.00933843	0.0361864
path:hsa04130	SNARE interactions in vesicular transport	FALSE	0	1	1	1	1	0.110138	0	0.460324	3.00799e-09	2.19406e-08	0.0596603	0	0.377929	1.21771e-09	9.15131e-09	0.0319087	0.001	0.3633	0.0075003	0.0300012
path:hsa04010	MAPK signaling pathway	TRUE	-0.03927	0.01	1	0.978898	1	0.222171	0.008	1	0.975759	0.985231	0.153252	0.008	1	0.975759	0.986857	0.0664075	0.011	1	0.980155	0.994353
path:hsa04935	Growth hormone synthesis, secretion and action	TRUE	0.0157889	0.016	0.99924	0.766012	1	0.157882	0.009	0.999769	0.789223	0.969858	0.0523646	0.007	0.999926	0.828033	0.941666	0.068601	0.013	1	0.982237	0.994353
path:hsa04137	Mitophagy - animal	FALSE	0.0523281	0	1	0.0150162	0.0443335	0.12448	0.002	1	0.949634	0.985231	0.0318188	0	1	0.0113929	0.0215682	0.124734	0.009	0.999997	0.938745	0.994353
path:hsa04810	Regulation of actin cytoskeleton	FALSE	0.0619564	0.004	0.998504	0.588529	0.999693	0.344215	0.006	0.992005	0.470972	0.641417	0.370265	0.004	0.91753	0.185829	0.274318	0.147719	0.011	0.999458	0.755216	0.994353
path:hsa04380	Osteoclast differentiation	FALSE	0.00297093	0.019	0.999971	0.915577	1	0.190976	0.007	0.999995	0.918655	0.985231	0.106236	0.004	0.999993	0.884776	0.974211	0.061076	0.009	1	0.977451	0.994353
path:hsa04260	Cardiac muscle contraction	FALSE	0.00395088	0.01	0.684753	0.0959745	0.220386	0.104001	0.002	0.460324	0.0176192	0.0316716	0.0482687	0.002	0.58404	0.0297087	0.0504642	0.0609753	0.005	0.518255	0.0368059	0.0903748
path:hsa03050	Proteasome	FALSE	0	1	1	1	1	0.0762495	0	0.15901	5.52129e-11	5.26646e-10	0.0596603	0	0.128941	2.95686e-11	2.93321e-10	0.0170185	0.003	0.45461	0.0215057	0.05926
path:hsa04144	Endocytosis	FALSE	0.136046	0	0.999999	0.0105185	0.0330203	0.226492	0.003	0.999999	0.922155	0.985231	0.0916056	0.001	0.999999	0.897826	0.974211	0.0256737	0.004	1	0.964164	0.994353
path:hsa04024	cAMP signaling pathway	FALSE	0.0915752	0.022	0.962831	0.435526	0.800077	0.126409	0.023	0.991653	0.610805	0.810052	0.240145	0.018	0.915169	0.304434	0.424156	0.0957096	0.029	0.995063	0.685822	0.994353
path:hsa04145	Phagosome	FALSE	0	1	1	1	1	0.0762495	0	0.911853	8.35214e-07	3.8358e-06	0.0894904	0	0.723953	5.03629e-08	3.1225e-07	0.118208	0.001	0.000288901	1.92925e-06	2.81443e-05
path:hsa04146	Peroxisome	FALSE	0	1	1	1	1	0.0762495	0	0.15901	5.52129e-11	5.26646e-10	0.0596603	0	0.128941	2.95686e-11	2.93321e-10	0.0170185	0.003	0.45461	0.0215057	0.05926
path:hsa00340	Histidine metabolism	FALSE	-0.0683234	0.001	0.0963813	0.000947877	0.00373133	0.0305351	0.014	0.000656802	6.52154e-05	0.000202168	0.0599137	0.009	0.181141	0.0102536	0.0198155	-0.0142973	0.01	0.091038	0.00481929	0.0206066
path:hsa04140	Autophagy - animal	FALSE	0.128082	0.008	0.995426	0.555542	0.977124	0.117979	0.01	0.999981	0.897825	0.985231	0.143319	0.005	0.996704	0.539695	0.68992	0.0958135	0.019	0.999992	0.942516	0.994353
path:hsa04261	Adrenergic signaling in cardiomyocytes	FALSE	0.140828	0.009	0.969781	0.365014	0.696334	0.0987787	0.007	0.999744	0.764017	0.952142	0.210466	0.008	0.735477	0.104148	0.159437	0.0375079	0.014	0.977452	0.445578	0.741633
path:hsa00220	Arginine biosynthesis	FALSE	-0.0322543	0.001	0.548834	0.0179371	0.0523341	0.144291	0.01	0.0491771	0.00244842	0.00547035	0.175652	0.01	0.0270761	0.00132096	0.00327599	0.0223443	0.013	0.208293	0.0158333	0.0560952
path:hsa04020	Calcium signaling pathway	FALSE	0.229584	0.004	0.972884	0.30358	0.601585	0.145045	0.005	0.999323	0.671626	0.872059	0.154633	0.003	0.977134	0.29796	0.41748	0.0501088	0.009	0.999982	0.894192	0.994353
path:hsa04141	Protein processing in endoplasmic reticulum	TRUE	-0.0837249	0	0.999904	0.000936967	0.00373133	0.114436	0	0.999916	0.00101641	0.00249575	0.129076	0	0.998815	0.000161204	0.000481671	0.0464641	0.001	0.999859	0.648759	0.994353
path:hsa04142	Lysosome	FALSE	0	1	1	1	1	0.0762495	0	0.15901	5.52129e-11	5.26646e-10	0.0596603	0	0.128941	2.95686e-11	2.93321e-10	0.0170185	0.003	0.45461	0.0215057	0.05926
path:hsa04022	cGMP-PKG signaling pathway	FALSE	0.134395	0.012	0.784409	0.149305	0.327679	0.130997	0.007	0.988375	0.447133	0.617283	0.185793	0.009	0.901412	0.223379	0.320219	0.0945242	0.016	0.849788	0.216491	0.40067
path:hsa00100	Steroid biosynthesis	FALSE	0	0.999	1	1	1	0.0762495	0	0.99296	3.03866e-05	0.000103231	0.109377	0.001	0.506208	0.0148481	0.0272764	-0.037079	0.004	0.00737441	0.000159373	0.00104012
path:hsa00900	Terpenoid backbone biosynthesis	FALSE	-0.000209145	0.989	0.993566	0.999635	1	0.111727	0.004	0.766652	0.0868171	0.134566	0.179411	0.003	0.112004	0.00253325	0.00576373	0.00665244	0.016	0.000174032	2.61191e-05	0.000239909
path:hsa03020	RNA polymerase	FALSE	0	1	1	1	1	0.0762495	0	0.15901	5.52129e-11	5.26646e-10	0.0596603	0	0.128941	2.95686e-11	2.93321e-10	0.0170185	0.003	0.45461	0.0215057	0.05926
path:hsa04114	Oocyte meiosis	FALSE	0.0583142	0.004	0.999955	0.814264	1	0.116273	0.004	0.999936	0.797786	0.969858	0.193028	0.003	0.997762	0.526718	0.680345	-0.0404309	0.015	0.974229	0.437311	0.737776
path:hsa00670	One carbon pool by folate	FALSE	-0.096092	0.001	0.167341	0.00207002	0.00777825	0.10111	0.004	0.366305	0.0171348	0.0312459	0.0905916	0.004	0.278652	0.0110031	0.0209904	-0.0361104	0.005	0.123964	0.0041652	0.0187813
path:hsa04350	TGF-beta signaling pathway	TRUE	4.39258e-07	0.989	1	1	1	0.131393	0	1	0.019255	0.0338669	0.0918523	0	1	0.019255	0.0336284	0.0124631	0.006	1	0.971292	0.994353
path:hsa00790	Folate biosynthesis	FALSE	-0.05792	0.001	0.041367	0.000322462	0.00140299	0.191035	0.006	0.0102829	0.000320181	0.000853816	0.0599558	0.003	0.177193	0.00469066	0.00977549	-0.0800999	0.005	2.48538e-05	1.36525e-06	2.11613e-05
path:hsa03022	Basal transcription factors	FALSE	0	1	1	1	1	0.0762495	0	0.15901	5.52129e-11	5.26646e-10	0.0596603	0	0.128941	2.95686e-11	2.93321e-10	0.0170185	0.003	0.45461	0.0215057	0.05926
path:hsa04110	Cell cycle	FALSE	-0.122482	0	1	0.019255	0.054264	0.224837	0	1	0.019255	0.0338669	0.0872121	0	1	0.019255	0.0336284	-0.0282364	0.012	1	0.981258	0.994353
path:hsa04911	Insulin secretion	TRUE	-0.0278708	0	0.302578	4.93662e-10	9.41755e-09	0.129221	0.008	0.148734	0.00734198	0.0145665	0.0194879	0.006	0.521641	0.0411073	0.0688825	0.0414014	0.012	0.763079	0.137951	0.273695
path:hsa04912	GnRH signaling pathway	FALSE	0.152646	0.009	0.950207	0.305644	0.601585	0.1539	0.01	0.996114	0.593743	0.791657	0.146062	0.008	0.984755	0.431161	0.574882	0.0428966	0.012	0.998602	0.697702	0.994353
path:hsa00430	Taurine and hypotaurine metabolism	FALSE	0.0460669	0.005	0.0154199	0.000406802	0.00170995	0.0887028	0.005	0.0179872	0.000475996	0.00121698	0.05906	0.003	0.00288616	4.91192e-05	0.000166871	0.0259294	0.006	0.243748	0.0116861	0.0439113
path:hsa04913	Ovarian steroidogenesis	FALSE	-0.00131755	0.013	0.916516	0.275274	0.561305	0.109636	0.003	0.823473	0.0991694	0.152758	0.0639345	0.004	0.94109	0.220831	0.318408	0.0172164	0.025	0.977335	0.511737	0.834234
path:hsa00310	Lysine degradation	FALSE	0.039864	0.008	0.948191	0.290303	0.580607	0.293879	0.008	0.0947372	0.00425444	0.0088664	0.155547	0.008	0.928717	0.252537	0.357881	0.123997	0.02	0.41319	0.0539919	0.126005
path:hsa04914	Progesterone-mediated oocyte maturation	FALSE	-0.0387073	0.007	0.999908	0.817599	1	0.0998392	0.005	0.999987	0.874928	0.985231	0.0486867	0.002	0.999892	0.719289	0.857614	-0.00977029	0.033	0.999993	0.961191	0.994353
path:hsa04115	p53 signaling pathway	FALSE	-0.0837249	0	1	0.019255	0.054264	0.127118	0	1	0.019255	0.0338669	0.139149	0	1	0.019255	0.0336284	-0.00632635	0.015	1	0.983903	0.994353
path:hsa04910	Insulin signaling pathway	TRUE	0.106664	0.008	0.999775	0.78165	1	0.210425	0.008	0.999935	0.842032	0.985231	0.156835	0.005	0.997677	0.571476	0.713161	-0.0486601	0.019	0.999975	0.919502	0.994353
path:hsa04919	Thyroid hormone signaling pathway	FALSE	0.0673942	0.007	0.99997	0.864086	1	0.179944	0.01	0.999999	0.961144	0.985231	0.0285667	0.006	1	0.953946	0.974211	0.105068	0.013	1	0.982237	0.994353
path:hsa04915	Estrogen signaling pathway	FALSE	0.0665041	0.013	0.962917	0.377685	0.709591	0.109882	0.014	0.999478	0.77774	0.964398	0.143584	0.01	0.988864	0.48853	0.63766	0.11054	0.02	0.999888	0.876294	0.994353
path:hsa04916	Melanogenesis	FALSE	0.0884213	0.006	0.998245	0.613268	1	0.0837061	0.005	0.999951	0.824718	0.979136	0.138469	0.007	0.985765	0.425263	0.570809	0.0182723	0.03	1	0.986577	0.994353
path:hsa04917	Prolactin signaling pathway	FALSE	0.00936742	0.006	0.999997	0.925732	1	0.143502	0.004	0.999997	0.904109	0.985231	0.0956595	0.002	0.999989	0.831551	0.941666	-0.00360514	0.042	1	0.992949	0.994353
path:hsa04918	Thyroid hormone synthesis	FALSE	0.0116788	0.009	0.794368	0.137475	0.304408	0.0897288	0.004	0.60506	0.0458136	0.0772038	0.0603985	0.003	0.728	0.0650232	0.102712	0.0301075	0.007	0.804667	0.12912	0.260935
path:hsa04122	Sulfur relay system	FALSE	0.0418625	0	0.539609	6.9121e-09	9.52334e-08	0.0762495	0	0.400423	1.56871e-09	1.17891e-08	0	1	0.0489322	0.993895	0.997919	0.00923466	0.003	0.577485	0.0355561	0.0881791
path:hsa03030	DNA replication	FALSE	0	1	1	1	1	0.0762495	0	0.15901	5.52129e-11	5.26646e-10	0.0596603	0	0.128941	2.95686e-11	2.93321e-10	0.0170185	0.003	0.45461	0.0215057	0.05926
path:hsa04360	Axon guidance	TRUE	0.0268167	0.006	0.999997	0.924396	1	0.16376	0.007	0.999999	0.95682	0.985231	0.0887322	0.005	0.999977	0.855687	0.964593	0.065251	0.012	1	0.981258	0.994353
path:hsa00440	Phosphonate and phosphinate metabolism	FALSE	0.0418625	0.003	0.155315	0.00390808	0.0132767	0.0767143	0.003	0.125904	0.00294993	0.00641738	0.0596622	0.003	0.0925344	0.00198768	0.00473986	0.00526941	0.008	0.032762	0.00132522	0.00714466
path:hsa00561	Glycerolipid metabolism	FALSE	-0.0201994	0.002	3.22149e-06	8.70104e-08	8.63144e-07	0.129208	0.009	2.03225e-05	2.38614e-06	9.39307e-06	0.0920843	0.009	0.000119074	9.724e-06	3.76805e-05	0.0374545	0.026	0.000480143	0.000104119	0.000717266
path:hsa04120	Ubiquitin mediated proteolysis	FALSE	0	1	1	1	1	0.0762495	0	0.15901	5.52129e-11	5.26646e-10	0.0596603	0	0.128941	2.95686e-11	2.93321e-10	0.0170185	0.003	0.45461	0.0215057	0.05926
path:hsa00564	Glycerophospholipid metabolism	FALSE	0.0284007	0.01	4.36461e-11	2.29807e-10	5.18111e-09	0.156902	0.013	8.15843e-08	6.55438e-08	3.9646e-07	0.126108	0.009	0.00304569	0.000151798	0.000459096	0.103368	0.022	8.4496e-08	1.50559e-07	2.8722e-06
path:hsa04922	Glucagon signaling pathway	FALSE	0.0366446	0.011	0.409709	0.0374593	0.096316	0.184762	0.006	0.783173	0.110717	0.169493	0.130354	0.006	0.52655	0.0418812	0.0697083	0.0283526	0.016	0.861401	0.227242	0.414382
path:hsa00565	Ether lipid metabolism	FALSE	0.0455171	0.006	0.000823731	3.14204e-05	0.00015279	0.187344	0.006	0.000101625	5.33292e-06	2.00388e-05	0.108448	0.006	0.0437555	0.00141988	0.00345226	0.0564805	0.014	5.91235e-05	9.51885e-06	9.83615e-05
path:hsa04923	Regulation of lipolysis in adipocytes	FALSE	-0.000902918	0.951	0.93053	0.986666	1	0.105352	0.011	0.91402	0.256661	0.37007	0.0763371	0.009	0.890736	0.211079	0.306126	0.029879	0.011	0.999891	0.839918	0.994353
path:hsa00562	Inositol phosphate metabolism	FALSE	0.111422	0.012	0.0467925	0.00270379	0.00957913	0.151149	0.017	0.0214278	0.00168888	0.00384259	0.11847	0.013	0.0093422	0.000603711	0.00155959	0.0740283	0.027	0.933237	0.381488	0.657007
path:hsa04924	Renin secretion	FALSE	0.0954664	0.009	0.868528	0.189114	0.397459	0.117114	0.005	0.90832	0.189269	0.279397	0.151123	0.006	0.636574	0.0630888	0.100942	0.0231769	0.012	0.745456	0.129415	0.260935
path:hsa00563	Glycosylphosphatidylinositol (GPI)-anchor biosynthesis	FALSE	0.0837274	0.003	0.000347412	7.08508e-06	4.08628e-05	0.0857076	0.005	0.00114373	3.47268e-05	0.000111847	0.135597	0.003	0.000119909	2.81133e-06	1.20209e-05	0.0264385	0.009	0.014511	0.000648843	0.00374217
path:hsa04925	Aldosterone synthesis and secretion	FALSE	0.100696	0.006	0.224861	0.0104208	0.0330203	0.0921207	0.006	0.69475	0.078361	0.122997	0.13792	0.005	0.16458	0.00601292	0.012223	0.0417266	0.009	0.612991	0.070819	0.159665
path:hsa04920	Adipocytokine signaling pathway	FALSE	-0.00938472	0.013	0.998639	0.707263	1	0.138109	0.004	0.988605	0.395405	0.554013	0.145847	0.002	0.983065	0.296338	0.41748	0.0157848	0.014	0.999857	0.844238	0.994353
path:hsa04921	Oxytocin signaling pathway	FALSE	0.119065	0.007	0.988224	0.445753	0.812844	0.150875	0.008	0.999825	0.795212	0.969858	0.165593	0.006	0.964224	0.307772	0.42641	0.036579	0.019	0.990698	0.578061	0.900692
path:hsa04926	Relaxin signaling pathway	FALSE	0.0252177	0.008	0.995027	0.547507	0.969869	0.143528	0.009	0.999887	0.825159	0.979136	0.121689	0.007	0.998978	0.671151	0.807987	0.0575199	0.033	1	0.991262	0.994353
path:hsa04927	Cortisol synthesis and secretion	FALSE	-0.0262708	0	0.857411	3.01671e-07	2.67194e-06	0.0915584	0.004	0.752493	0.0818404	0.12765	0.0489329	0.003	0.828766	0.101737	0.157692	0.0635565	0.009	0.942812	0.288987	0.515602
path:hsa04928	Parathyroid hormone synthesis, secretion and action	FALSE	-0.0680948	0.003	0.999969	0.8134	1	0.124332	0.006	0.999993	0.90242	0.985231	0.0533576	0.005	0.999997	0.917637	0.974211	0.0659109	0.013	1	0.982237	0.994353
path:hsa04929	GnRH secretion	FALSE	0	1	1	1	1	0.0762495	0	0.15901	5.52129e-11	5.26646e-10	0.0596603	0	0.128941	2.95686e-11	2.93321e-10	0.0170185	0.003	0.45461	0.0215057	0.05926
path:hsa04210	Apoptosis	FALSE	-0.0808722	0.007	1	0.965977	1	0.150279	0.008	0.999998	0.936951	0.985231	0.229114	0.005	0.999995	0.905486	0.974211	0.0955794	0.01	1	0.978898	0.994353
path:hsa04211	Longevity regulating pathway	FALSE	-0.0573796	0.006	0.999913	0.810163	1	0.206605	0.013	0.999847	0.836138	0.985231	0.126167	0.01	0.999805	0.80581	0.929493	0.0404129	0.019	1	0.986425	0.994353
path:hsa04213	Longevity regulating pathway - multiple species	FALSE	0.00315465	0.01	0.999929	0.851897	1	0.141255	0.004	0.999851	0.752347	0.947116	0.127667	0.002	0.999143	0.572254	0.713161	0.0504011	0.01	0.999975	0.889427	0.994353
path:hsa00770	Pantothenate and CoA biosynthesis	FALSE	-0.0231321	0	0.67979	3.05462e-08	3.44339e-07	0.0907833	0.011	0.00489004	0.000284105	0.000765849	0.059968	0.007	0.000663953	3.07116e-05	0.000108807	-0.00700921	0.009	0.00412777	0.000199668	0.00123794
path:hsa04330	Notch signaling pathway	FALSE	0	0.999	1	1	1	0.114374	0.001	0.991108	0.305302	0.435143	0.0596603	0	0.999988	0.00284499	0.00635638	0.00145086	0.004	1	0.964164	0.994353
path:hsa00410	beta-Alanine metabolism	FALSE	-0.066461	0	0.0183287	2.53492e-13	1.25732e-11	0.135713	0.014	0.0102829	0.000708224	0.00179224	0.0939738	0.008	0.0514859	0.00214252	0.00496584	0.049977	0.026	0.20071	0.0245727	0.0662393
path:hsa00531	Glycosaminoglycan degradation	FALSE	0.0470953	0	0.870961	3.78435e-07	3.23627e-06	0.102644	0	0.878324	4.30675e-07	2.25075e-06	0.152465	0.001	0.327276	0.00618312	0.0124668	-0.00330591	0.012	0.931615	0.293253	0.519477
path:hsa04218	Cellular senescence	TRUE	0.0892151	0.006	1	0.971292	1	0.0931901	0.007	1	0.973746	0.985231	0.229063	0.005	1	0.957461	0.974211	-0.0235832	0.021	1	0.987408	0.994353
path:hsa00532	Glycosaminoglycan biosynthesis - chondroitin sulfate / dermatan sulfate	FALSE	0.0418625	0.003	0.556552	0.0327083	0.0862941	0.0762495	0.003	0.745934	0.0701	0.111441	0	0.997	0.123877	0.869851	0.970222	0.0325861	0.004	0.668169	0.0584637	0.133018
path:hsa00650	Butanoate metabolism	FALSE	0.0156314	0.015	0.768913	0.155155	0.337531	0.143634	0.011	0.0316845	0.00168207	0.00384259	0.0600298	0.007	0.579961	0.0553721	0.0903439	0.0578541	0.017	0.000196669	3.09475e-05	0.000264655
path:hsa04215	Apoptosis - multiple species	FALSE	0	1	1	1	1	0.0953738	0	0.999713	0.000465191	0.00120174	0.139149	0	0.999726	0.00048014	0.00129429	0.0214941	0.001	1	0.932067	0.994353
path:hsa00533	Glycosaminoglycan biosynthesis - keratan sulfate	FALSE	0	1	1	1	1	0.0762495	0	0.15901	5.52129e-11	5.26646e-10	0.0596603	0	0.128941	2.95686e-11	2.93321e-10	0.0170185	0.003	0.45461	0.0215057	0.05926
path:hsa04216	Ferroptosis	FALSE	-0.100819	0.001	0.645831	0.0273909	0.0742974	0.13221	0.006	0.649552	0.0661947	0.106599	0.0596305	0.004	0.889187	0.155994	0.233051	0.0332045	0.006	0.965583	0.31215	0.54903
path:hsa00534	Glycosaminoglycan biosynthesis - heparan sulfate / heparin	FALSE	0	0.997	1	1	1	0.0762495	0.001	0.430658	0.0104814	0.0196923	0.0447452	0.001	0.164648	0.00202059	0.00477244	0.0209104	0.002	0.616657	0.0339734	0.085105
path:hsa03008	Ribosome biogenesis in eukaryotes	TRUE	0	1	1	1	1	0.0762495	0	0.246222	2.31365e-10	2.04923e-09	0.0596603	0	0.203756	1.21351e-10	1.07483e-09	0.0170185	0.003	0.603474	0.0394193	0.095843
path:hsa04217	Necroptosis	FALSE	-0.0820071	0.003	0.999999	0.932035	1	0.168867	0.005	0.999998	0.923349	0.985231	0.0987978	0.005	0.999997	0.919314	0.974211	0.0430675	0.011	0.999988	0.913237	0.994353
path:hsa03010	Ribosome	FALSE	0	1	1	1	1	0.0762495	0	0.15901	5.52129e-11	5.26646e-10	0.0596603	0	0.128941	2.95686e-11	2.93321e-10	0.0170185	0.003	0.45461	0.0215057	0.05926
path:hsa00780	Biotin metabolism	FALSE	0	0.999	1	1	1	0.0762495	0.001	0.544826	0.0176237	0.0316716	0.0596603	0.001	0.478504	0.0130997	0.0244265	0.0170185	0.004	0.892221	0.158753	0.305199
path:hsa03013	RNA transport	TRUE	-0.209312	0	0.941295	1.75278e-06	1.20747e-05	0.304998	0	0.925167	1.13854e-06	4.78572e-06	0.2985	0	0.687132	3.31371e-08	2.22108e-07	0.108751	0.001	0.879832	0.0877287	0.190848
path:hsa04340	Hedgehog signaling pathway	FALSE	0	1	1	1	1	0.05725	0	0.999957	0.0014858	0.00354305	0.0596603	0	1	0.0136717	0.0253029	-0.0151685	0.014	1	0.983113	0.994353
path:hsa03018	RNA degradation	TRUE	0	1	1	1	1	0.0762495	0	0.878962	4.3563e-07	2.25075e-06	0.0596603	0	0.833349	2.07705e-07	1.14469e-06	0.0351807	0.001	0.769227	0.0480084	0.113391
path:hsa00785	Lipoic acid metabolism	FALSE	0	0.998	1	1	1	0.0807083	0.003	0.282544	0.00939239	0.0180567	0.0596603	0.002	0.452069	0.0169892	0.0305313	0.0171541	0.008	0.719719	0.0982097	0.208171
path:hsa03015	mRNA surveillance pathway	TRUE	-0.0420856	0	0.936396	1.52527e-06	1.10274e-05	0.152316	0.001	0.930964	0.127879	0.194564	0.178808	0.001	0.541051	0.0173332	0.0309254	0.0132422	0.006	0.542253	0.0444413	0.107004
