# Supplementary material for: Rapid Identification of Druggable Targets and the Power of the PHENotype SIMulator for Effective Drug Repurposing in COVID-19
Source: Res Sq. 2021 Apr 14:rs.3.rs-287183. Preprint. [Version 1] doi: 10.21203/rs.3.rs-287183/v1 (PMC8057245; doi:10.21203/rs.3.rs-287183/v1)
Supplement: Supplement [file ab26b7fc7423a8a675cf02aa.xlsx]

## Sheet: Foglio1
Potential CD147 activators
Gene Name	References
β3GnT8	Zhi Jiang et al. β3GnT8 plays an important role in CD147 signal transduction as an upstream modulator of MMP production in tumor cells. ONCOLOGY REPORTS 2014, DOI: 10.3892/or.2014.3280
Sp1	Ling-Min Kong et al. A Regulatory Loop Involving miR-22, Sp1, and c-Myc Modulates CD147 Expression in Breast Cancer Invasion and Metastasis. Cancer Res; 74(14); 3764–78. _2014 AACR.
	Xia Ke et al. Hypoxia upregulates CD147 through a combined effect of HIF-1α and Sp1 to promote glycolysis and tumor progression in epithelial solid tumors. Carcinogenesis vol.33 no.8 pp.1598–1607, 2012 doi:10.1093/carcin/bgs196 Advance Access Publication June 7, 2012.
MYC	Ling-Min Kong et al., A Regulatory Loop Involving miR-22, Sp1, and c-Myc Modulates CD147 Expression in Breast Cancer Invasion and Metastasis. Cancer Res; 74(14); 3764–78. _2014 AACR.
EGFR	G. Daniel Grass et al., How, with whom and when: an overview of CD147-mediated regulatory networks influencing matrix metalloproteinase activity. Biosci. Rep. (2016) / 36 / art:e00283 / doi 10.1042/BSR20150256
EGF	Lijuan Xiong et al., The Biological Function and Clinical Utilization of CD147 in Human Diseases: A Review of the Current Scientific Literature. Int. J. Mol. Sci. 2014, 15, 17411-17441; doi:10.3390/ijms151017411
	G. Daniel Grass et al., How, with whom and when: an overview of CD147-mediated regulatory networks influencing matrix metalloproteinase activity. Biosci. Rep. (2016) / 36 / art:e00283 / doi 10.1042/BSR20150256
TGFB1	Lijuan Xiong et al., The Biological Function and Clinical Utilization of CD147 in Human Diseases: A Review of the Current Scientific Literature. Int. J. Mol. Sci. 2014, 15, 17411-17441; doi:10.3390/ijms151017411
RANKL	Nadia Rucci et al.,Receptor Activator of NF-κB Ligand Enhances Breast Cancer–Induced Osteolytic Lesions through Upregulation of Extracellular Matrix Metalloproteinase Inducer/CD147. Cancer Res; 70(15); 6150–60. ©2010 AACR. DOI: 10.1158/0008-5472.CAN-09-2758
HIF1A	Xia Ke et al., Hypoxia upregulates CD147 through a combined effect of HIF-1α and Sp1 to promote glycolysis and tumor progression in epithelial solid tumors. Carcinogenesis vol.33 no.8 pp.1598–1607, 2012 doi:10.1093/carcin/bgs196 Advance Access Publication June 7, 2012.
MCT1	Xia Ke et al., Hypoxia upregulates CD147 through a combined effect of HIF-1α and Sp1 to promote glycolysis and tumor progression in epithelial solid tumors. Carcinogenesis vol.33 no.8 pp.1598–1607, 2012 doi:10.1093/carcin/bgs196 Advance Access Publication June 7, 2012.
IGF1	Lijuan Xiong et al., The Biological Function and Clinical Utilization of CD147 in Human Diseases: A Review of the Current Scientific Literature. Int. J. Mol. Sci. 2014, 15, 17411-17441; doi:10.3390/ijms151017411
Genes activated by CD147
Gene Name	References
MMPs	Zhi Jiang et al. β3GnT8 plays an important role in CD147 signal transduction as an upstream modulator of MMP production in tumor cells. Oncology Reports 2014, DOI: 10.3892/or.2014.3280
MMP2	Lijuan Xiong et al., The Biological Function and Clinical Utilization of CD147 in Human Diseases: A Review of the Current Scientific Literature. Int. J. Mol. Sci. 2014, 15, 17411-17441; doi:10.3390/ijms151017411
	Pengfei Ding et al., CD147 functions as the signaling receptor for extracellular divalent copper in hepatocellular carcinoma cells. Oncotarget, 2017, Vol. 8, (No. 31), pp: 51151-51163
MMP9	Lijuan Xiong et al., The Biological Function and Clinical Utilization of CD147 in Human Diseases: A Review of the Current Scientific Literature. Int. J. Mol. Sci. 2014, 15, 17411-17441; doi:10.3390/ijms151017411
	Nadia Rucci et al., Receptor Activator of NF-κB Ligand Enhances Breast Cancer–Induced Osteolytic Lesions through Upregulation of Extracellular Matrix Metalloproteinase Inducer/CD147. Cancer Res; 70(15); 6150–60. ©2010 AACR. DOI: 10.1158/0008-5472.CAN-09-2758
MMP14	Lijuan Xiong et al., The Biological Function and Clinical Utilization of CD147 in Human Diseases: A Review of the Current Scientific Literature. Int. J. Mol. Sci. 2014, 15, 17411-17441; doi:10.3390/ijms151017411
	Pengfei Ding et al., CD147 functions as the signaling receptor for extracellular divalent copper in hepatocellular carcinoma cells. Oncotarget, 2017, Vol. 8, (No. 31), pp: 51151-51163
NFKB1	Lijuan Xiong et al., The Biological Function and Clinical Utilization of CD147 in Human Diseases: A Review of the Current Scientific Literature. Int. J. Mol. Sci. 2014, 15, 17411-17441; doi:10.3390/ijms151017411
IL6	Lijuan Xiong et al., The Biological Function and Clinical Utilization of CD147 in Human Diseases: A Review of the Current Scientific Literature. Int. J. Mol. Sci. 2014, 15, 17411-17441; doi:10.3390/ijms151017411
MCT1	Lijuan Xiong et al., The Biological Function and Clinical Utilization of CD147 in Human Diseases: A Review of the Current Scientific Literature. Int. J. Mol. Sci. 2014, 15, 17411-17441; doi:10.3390/ijms151017411
VEGFA	Nadia Rucci et al., Receptor Activator of NF-κB Ligand Enhances Breast Cancer–Induced Osteolytic Lesions through Upregulation of Extracellular Matrix Metalloproteinase Inducer/CD147. Cancer Res; 70(15); 6150–60. ©2010 AACR. DOI: 10.1158/0008-5472.CAN-09-2758
STAT3	Lijuan Xiong et al., The Biological Function and Clinical Utilization of CD147 in Human Diseases: A Review of the Current Scientific Literature. Int. J. Mol. Sci. 2014, 15, 17411-17441; doi:10.3390/ijms151017411
ABCG2	Lijuan Xiong et al., The Biological Function and Clinical Utilization of CD147 in Human Diseases: A Review of the Current Scientific Literature. Int. J. Mol. Sci. 2014, 15, 17411-17441; doi:10.3390/ijms151017411
PI3K	Henning Ulrich et al., CD147 as a Target for COVID-19 Treatment: Suggested Effectsof Azithromycin and Stem Cell Engagement. Stem Cell Reviews and Reports 2020
AKT1	Lijuan Xiong et al., The Biological Function and Clinical Utilization of CD147 in Human Diseases: A Review of the Current Scientific Literature. Int. J. Mol. Sci. 2014, 15, 17411-17441; doi:10.3390/ijms151017411
MAPK1	Lijuan Xiong et al., The Biological Function and Clinical Utilization of CD147 in Human Diseases: A Review of the Current Scientific Literature. Int. J. Mol. Sci. 2014, 15, 17411-17441; doi:10.3390/ijms151017411
IL18	Lijuan Xiong et al., The Biological Function and Clinical Utilization of CD147 in Human Diseases: A Review of the Current Scientific Literature. Int. J. Mol. Sci. 2014, 15, 17411-17441; doi:10.3390/ijms151017411
Src	Shi-Jie Wang et al., CD147 promotes Src-dependent activation of Rac1 signaling through STAT3/DOCK8 during the motility of hepatocellular carcinoma cells. Oncotarget, 2014, Vol. 6, No. 1
RAC1	Shi-Jie Wang et al., CD147 promotes Src-dependent activation of Rac1 signaling through STAT3/DOCK8 during the motility of hepatocellular carcinoma cells. Oncotarget, 2014, Vol. 6, No. 1
