# Supplementary material for: Rapid Identification of Druggable Targets and the Power of the PHENotype SIMulator for Effective Drug Repurposing in COVID-19
Source: Research Square preprint supplement (doi:10.21203/rs.3.rs-287183/v1), 2021-04-14
Supplement: Supplementary file 1 [file A549-ACE2_MOI_0.2.xlsx]

## Sheet: MITHrIL
Pathway.Id	Pathway.Name	Impact.Factor	Probability.Pi	Probability.Network	Corrected.Accumulator	pValue	Adjusted.pValue
path:hsa00010	Glycolysis / Gluconeogenesis	14.1746	5.52907e-06	4.9975e-06	-28.8664	2.3101e-10	5.77526e-08
path:hsa04512	ECM-receptor interaction	10.1635	0.000185299	4.9975e-06	-21.0167	8.45729e-09	1.05716e-06
path:hsa00100	Steroid biosynthesis	10.7728	0.000935892	4.9975e-06	-35.3899	5.11781e-08	4.26485e-06
path:hsa04060	Cytokine-cytokine receptor interaction	8.59188	0.00133054	4.9975e-06	56.9687	7.69133e-08	4.37319e-06
path:hsa00630	Glyoxylate and dicarboxylate metabolism	9.00454	0.00173358	4.9975e-06	-30.7959	1.04956e-07	4.37319e-06
path:hsa00620	Pyruvate metabolism	8.65484	0.00168857	4.9975e-06	-17.7304	1.01744e-07	4.37319e-06
path:hsa04061	Viral protein interaction with cytokine and cytokine receptor	8.11832	0.00228096	4.9975e-06	38.7416	1.45521e-07	5.19718e-06
path:hsa01200	Carbon metabolism	8.52488	0.00306472	4.9975e-06	-62.2796	2.07974e-07	6.49919e-06
path:hsa01230	Biosynthesis of amino acids	7.9178	0.00589193	4.9975e-06	-34.4964	4.68627e-07	1.30174e-05
path:hsa00071	Fatty acid degradation	6.78546	0.0107939	4.9975e-06	-23.7999	1.02669e-06	2.56672e-05
path:hsa01212	Fatty acid metabolism	6.44142	0.023698	4.9975e-06	-32.0593	3.01262e-06	6.52376e-05
path:hsa00020	Citrate cycle (TCA cycle)	6.11501	0.0243522	4.9975e-06	-18.1729	3.1314e-06	6.52376e-05
path:hsa04657	IL-17 signaling pathway	10.9555	0.000362089	0.001999	-17.3159	4.81135e-06	9.2526e-05
path:hsa04630	JAK-STAT signaling pathway	7.23417	0.0353949	4.9975e-06	56.9839	5.385e-06	9.61607e-05
path:hsa00640	Propanoate metabolism	5.40405	0.0633523	4.9975e-06	-22.1677	1.31466e-05	0.000219111
path:hsa00900	Terpenoid backbone biosynthesis	5.20587	0.0876349	4.9975e-06	-14.1042	2.233e-05	0.000348906
path:hsa04064	NF-kappa B signaling pathway	13.2455	1.54016e-05	0.0854573	13.2193	4.51928e-05	0.0006646
path:hsa04540	Gap junction	8.73861	0.160081	4.9975e-06	49.5439	6.50041e-05	0.000836262
path:hsa04151	PI3K-Akt signaling pathway	9.44288	0.00126625	0.007996	44.8489	6.18816e-05	0.000836262
path:hsa04713	Circadian entrainment	5.89013	0.162533	4.9975e-06	43.2371	6.6901e-05	0.000836262
path:hsa04672	Intestinal immune network for IgA production	5.83954	0.206195	4.9975e-06	21.4456	0.00010649	0.00126774
path:hsa01100	Metabolic pathways	4.06725	0.212402	4.9975e-06	-340.349	0.000113082	0.00128503
path:hsa00280	Valine, leucine and isoleucine degradation	4.34482	0.238871	4.9975e-06	-23.3253	0.000144206	0.00156745
path:hsa04710	Circadian rhythm	5.47611	0.0243522	0.0009995	-14.6983	0.000172418	0.00179603
path:hsa04623	Cytosolic DNA-sensing pathway	7.90455	0.0106572	0.003998	-23.8585	0.000229648	0.00229648
path:hsa00410	beta-Alanine metabolism	7.1901	0.00620607	0.0089955	-8.64773	0.000290012	0.00278857
path:hsa04115	p53 signaling pathway	6.43822	0.0765006	0.00049975	-27.8592	0.000422958	0.00391628
path:hsa04725	Cholinergic synapse	7.36418	0.401823	4.9975e-06	58.0762	0.000484632	0.00432708
path:hsa04141	Protein processing in endoplasmic reticulum	5.29983	0.103507	0.00049975	-18.6093	0.000642982	0.00535818
path:hsa04380	Osteoclast differentiation	10.6275	0.000382256	0.116442	17.9674	0.000633828	0.00535818
path:hsa00270	Cysteine and methionine metabolism	4.72534	0.488257	4.9975e-06	-20.1005	0.000832405	0.00671295
path:hsa04062	Chemokine signaling pathway	5.71672	0.512792	4.9975e-06	99.403	0.000964953	0.00753869
path:hsa00561	Glycerolipid metabolism	4.68539	0.0617227	0.00249875	-13.891	0.00105511	0.00799327
path:hsa00052	Galactose metabolism	4.11292	0.169892	0.00049975	-12.2317	0.00134171	0.00986553
path:hsa00650	Butanoate metabolism	5.43244	0.60628	4.9975e-06	-15.7596	0.00167945	0.0119961
path:hsa00330	Arginine and proline metabolism	3.97941	0.218464	0.00049975	-18.2832	0.00201023	0.0139599
path:hsa00250	Alanine, aspartate and glutamate metabolism	4.02183	0.228726	0.00049975	-16.6714	0.00217042	0.014665
path:hsa00062	Fatty acid elongation	6.66787	0.23576	0.00049975	-22.5217	0.00228429	0.0150282
path:hsa04530	Tight junction	4.75546	0.200368	0.0009995	-33.1857	0.00272284	0.0174541
path:hsa00480	Glutathione metabolism	3.442	0.2038	0.0009995	-15.3053	0.00279592	0.0174745
path:hsa00051	Fructose and mannose metabolism	4.03359	0.161366	0.001999	-13.0116	0.00312368	0.0190469
path:hsa04724	Glutamatergic synapse	6.38416	0.724163	4.9975e-06	39.8548	0.00344016	0.0198238
path:hsa00590	Arachidonic acid metabolism	3.24777	0.303578	0.00049975	-14.8502	0.00356828	0.0198238
path:hsa00592	alpha-Linolenic acid metabolism	2.44679	0.724627	4.9975e-06	-6.25997	0.00345033	0.0198238
path:hsa00471	D-Glutamine and D-glutamate metabolism	0	1	0.00349825	-4.51925	0.00349825	0.0198238
path:hsa04935	Growth hormone synthesis, secretion and action	8.45121	0.147327	0.003998	56.3321	0.00444258	0.0241444
path:hsa04971	Gastric acid secretion	7.74526	0.348775	0.00049975	38.391	0.00463873	0.0241601
path:hsa00260	Glycine, serine and threonine metabolism	5.92235	0.161366	0.00349825	-13.8843	0.00457628	0.0241601
path:hsa00310	Lysine degradation	4.83384	0.352537	0.00049975	-19.0303	0.00473671	0.0241669
path:hsa00061	Fatty acid biosynthesis	4.52163	0.184382	0.0029985	-10.091	0.0049596	0.0244024
path:hsa03015	mRNA surveillance pathway	2.68238	0.361575	0.00049975	-7.69597	0.00497808	0.0244024
path:hsa04622	RIG-I-like receptor signaling pathway	6.2021	0.0584517	0.0214893	-21.0017	0.00554575	0.0266623
path:hsa04137	Mitophagy - animal	11.6579	0.828146	4.9975e-06	-35.9284	0.00706474	0.0304515
path:hsa04390	Hippo signaling pathway	4.18149	0.269056	0.001999	-32.8551	0.00674389	0.0304515
path:hsa00531	Glycosaminoglycan degradation	5.32274	0.218091	0.00349825	-12.262	0.0069921	0.0304515
path:hsa03440	Homologous recombination	0	1	0.00649675	-7.22367	0.00649675	0.0304515
path:hsa00190	Oxidative phosphorylation	2.92819	0.246378	0.00249875	-7.08888	0.00675541	0.0304515
path:hsa00072	Synthesis and degradation of ketone bodies	4.81815	0.350079	0.0009995	-6.9943	0.00699458	0.0304515
path:hsa04625	C-type lectin receptor signaling pathway	9.90362	0.00120759	0.368316	5.129	0.0085858	0.0363805
path:hsa00030	Pentose phosphate pathway	3.98686	0.194236	0.0069965	-14.1653	0.00945048	0.039377
path:hsa04658	Th1 and Th2 cell differentiation	7.04635	0.101573	0.021989	26.6024	0.0100569	0.0399084
path:hsa04136	Autophagy - other	0	1	0.009995	-12.071	0.009995	0.0399084
path:hsa04210	Apoptosis	9.40216	0.00346938	0.278361	7.44587	0.0100466	0.0399084
path:hsa04920	Adipocytokine signaling pathway	10.0784	0.000914705	0.46077	0.738721	0.0115003	0.044923
path:hsa04662	B cell receptor signaling pathway	7.83483	0.0267372	0.111444	16.8629	0.0129619	0.0483651
path:hsa00040	Pentose and glucuronate interconversions	2.90204	0.472885	0.0009995	-9.41309	0.0127637	0.0483651
path:hsa04610	Complement and coagulation cascades	5.14766	0.0524504	0.0629685	8.49024	0.0129167	0.0483651
path:hsa00350	Tyrosine metabolism	3.49591	0.301935	0.00549725	-12.3043	0.0151954	0.0558653
path:hsa04923	Regulation of lipolysis in adipocytes	8.47569	0.608858	0.00049975	33.3681	0.0165261	0.0598772
path:hsa00790	Folate biosynthesis	4.44747	0.125474	0.033983	-8.53559	0.0177579	0.0634212
path:hsa00053	Ascorbate and aldarate metabolism	3.41298	0.218091	0.0154923	-4.39605	0.0189462	0.0667121
path:hsa00380	Tryptophan metabolism	3.04673	0.382704	0.00449775	-12.5377	0.0197897	0.0687141
path:hsa00970	Aminoacyl-tRNA biosynthesis	5.75235	0.656823	0.00049975	-22.3598	0.0206096	0.0705807
path:hsa04350	TGF-beta signaling pathway	3.93448	0.420042	0.003998	-24.4128	0.0217904	0.0732967
path:hsa04975	Fat digestion and absorption	0	1	0.021989	-3.14945	0.021989	0.0732967
path:hsa04659	Th17 cell differentiation	6.86198	0.110842	0.053973	20.7093	0.0227071	0.0746946
path:hsa04972	Pancreatic secretion	6.7034	0.161366	0.035982	15.8543	0.0243301	0.0774929
path:hsa04215	Apoptosis - multiple species	4.27711	0.426635	0.00449775	-13.0748	0.02397	0.0774929
path:hsa00524	Neomycin, kanamycin and gentamicin biosynthesis	0	1	0.0244878	-1.5789	0.0244878	0.0774929
path:hsa04970	Salivary secretion	5.82431	0.238871	0.0214893	18.9204	0.0266101	0.0831567
path:hsa00510	N-Glycan biosynthesis	4.05083	0.611178	0.00149925	-30.2979	0.0287865	0.0888471
path:hsa04973	Carbohydrate digestion and absorption	0	1	0.0329835	12.0272	0.0329835	0.0997127
path:hsa00670	One carbon pool by folate	3.08559	0.755767	0.00049975	-9.42769	0.0331046	0.0997127
path:hsa00450	Selenocompound metabolism	0	1	0.037981	-5.10493	0.037981	0.113039
path:hsa03320	PPAR signaling pathway	3.25985	0.323572	0.0204898	-7.6064	0.0384631	0.113127
path:hsa04924	Renin secretion	9.19681	0.633803	0.00249875	29.1471	0.0406497	0.118168
path:hsa04614	Renin-angiotensin system	0	1	0.0449775	-1.46658	0.0449775	0.129246
path:hsa04740	Olfactory transduction	4.1066	0.502994	0.00849575	18.05	0.0462379	0.131358
path:hsa00513	Various types of N-glycan biosynthesis	0	1	0.0524738	-7.4413	0.0524738	0.14576
path:hsa00430	Taurine and hypotaurine metabolism	3.67579	0.145735	0.107446	2.49254	0.0523054	0.14576
path:hsa04977	Vitamin digestion and absorption	0	1	0.0554723	-1.39594	0.0554723	0.152396
path:hsa04915	Estrogen signaling pathway	7.85888	0.55714	0.00849575	39.3978	0.0563515	0.153129
path:hsa04917	Prolactin signaling pathway	9.73214	0.22716	0.0714643	20.5489	0.0587949	0.158051
path:hsa03013	RNA transport	1.87702	0.825326	0.0009995	-9.89064	0.0638192	0.167945
path:hsa04976	Bile secretion	5.94056	0.0395221	0.344328	1.95159	0.0636063	0.167945
path:hsa01040	Biosynthesis of unsaturated fatty acids	4.60917	0.408463	0.0309845	-4.96055	0.0689678	0.175938
path:hsa00730	Thiamine metabolism	3.31239	0.316738	0.0524738	-2.5296	0.0689539	0.175938
path:hsa00340	Histidine metabolism	6.22934	0.0176169	0.501749	-0.0142497	0.0686625	0.175938
path:hsa00140	Steroid hormone biosynthesis	3.14611	0.889833	0.00049975	-20.6625	0.0721184	0.180296
path:hsa04750	Inflammatory mediator regulation of TRP channels	6.48648	0.229725	0.0914543	17.1841	0.0714813	0.180296
path:hsa00220	Arginine biosynthesis	4.02734	0.569848	0.0129935	-8.51934	0.0735481	0.18205
path:hsa04024	cAMP signaling pathway	5.91843	0.0720714	0.284358	9.20561	0.0755344	0.185133
path:hsa04916	Melanogenesis	7.00916	0.474638	0.0254873	25.9045	0.077073	0.185272
path:hsa04110	Cell cycle	5.28373	0.767387	0.0029985	-25.3954	0.0768314	0.185272
path:hsa04721	Synaptic vesicle cycle	4.61209	0.126528	0.214893	4.03275	0.0858917	0.204504
path:hsa04520	Adherens junction	7.86253	0.747069	0.0049975	-23.3011	0.0883358	0.208339
path:hsa03018	RNA degradation	2.60322	0.316738	0.0809595	-1.38712	0.0923919	0.215869
path:hsa04726	Serotonergic synapse	11.2694	0.926211	0.00049975	39.4634	0.0963109	0.222942
path:hsa04961	Endocrine and other factor-regulated calcium reabsorption	9.97289	0.205254	0.162419	9.17033	0.1006	0.230734
path:hsa04921	Oxytocin signaling pathway	5.57074	0.357824	0.077961	21.6486	0.10367	0.235613
path:hsa04926	Relaxin signaling pathway	9.14655	0.780365	0.00649675	45.9326	0.113231	0.249875
path:hsa04928	Parathyroid hormone synthesis, secretion and action	5.8338	0.202298	0.190905	11.5361	0.113573	0.249875
path:hsa00440	Phosphonate and phosphinate metabolism	2.80845	0.562292	0.029985	-1.6359	0.111381	0.249875
path:hsa00290	Valine, leucine and isoleucine biosynthesis	0	1	0.113943	-0.92891	0.113943	0.249875
path:hsa04072	Phospholipase D signaling pathway	6.51633	0.647786	0.0189905	33.8575	0.115255	0.250554
path:hsa04668	TNF signaling pathway	7.42054	0.023471	0.62069	-3.8537	0.117494	0.25322
path:hsa04660	T cell receptor signaling pathway	6.25963	0.273063	0.153423	16.9888	0.125204	0.265435
path:hsa04612	Antigen processing and presentation	2.97379	0.513934	0.0484758	-5.03349	0.125285	0.265435
path:hsa00232	Caffeine metabolism	0	1	0.126937	-0.534828	0.126937	0.266673
path:hsa04620	Toll-like receptor signaling pathway	6.58521	0.0415869	0.551224	-1.63912	0.128384	0.267468
path:hsa00860	Porphyrin and chlorophyll metabolism	2.77681	0.716062	0.0154923	-12.1822	0.13103	0.270724
path:hsa04261	Adrenergic signaling in cardiomyocytes	5.72289	0.517911	0.0529735	22.0147	0.133196	0.270724
path:hsa04925	Aldosterone synthesis and secretion	6.17598	0.300972	0.145927	10.2965	0.132604	0.270724
path:hsa04510	Focal adhesion	9.83094	0.00122073	0.930535	-27.2754	0.136425	0.27505
path:hsa04611	Platelet activation	6.27309	0.393776	0.103948	21.1683	0.139833	0.279667
path:hsa00500	Starch and sucrose metabolism	3.28797	0.78001	0.0114943	-8.77116	0.144198	0.286106
path:hsa04010	MAPK signaling pathway	5.59267	0.0572075	0.556222	-3.05356	0.154744	0.303559
path:hsa00472	D-Arginine and D-ornithine metabolism	0	1	0.155422	-0.0392562	0.155422	0.303559
path:hsa04730	Long-term depression	24.9013	0.953115	0.0009995	37.6878	0.158599	0.304997
path:hsa01210	2-Oxocarboxylic acid metabolism	3.79951	0.755767	0.0174913	-6.92531	0.158382	0.304997
path:hsa04360	Axon guidance	4.80125	0.835822	0.00949525	37.8749	0.166641	0.310897
path:hsa04723	Retrograde endocannabinoid signaling	8.5217	0.956496	0.0009995	35.1735	0.164758	0.310897
path:hsa04217	Necroptosis	5.1891	0.180611	0.31984	5.95319	0.164372	0.310897
path:hsa00785	Lipoic acid metabolism	0	1	0.165417	-0.893201	0.165417	0.310897
path:hsa04910	Insulin signaling pathway	6.82002	0.289338	0.216892	10.3052	0.172037	0.317012
path:hsa00360	Phenylalanine metabolism	4.98583	0.0340038	0.687656	-1.05119	0.172455	0.317012
path:hsa04152	AMPK signaling pathway	7.28369	0.0518235	0.61969	-3.00096	0.174809	0.318994
path:hsa04927	Cortisol synthesis and secretion	7.19139	0.304087	0.211394	8.17096	0.176359	0.31949
path:hsa00983	Drug metabolism - other enzymes	2.02216	0.919105	0.00349825	-12.8786	0.179367	0.322603
path:hsa03460	Fanconi anemia pathway	3.26645	0.633702	0.0524738	-10.7825	0.182772	0.326379
path:hsa04966	Collecting duct acid secretion	0	1	0.184908	2.39099	0.184908	0.32785
path:hsa04066	HIF-1 signaling pathway	7.24958	0.645713	0.053973	19.1288	0.191502	0.334137
path:hsa04216	Ferroptosis	45.0688	0.928984	0.00349825	-12.7998	0.192463	0.334137
path:hsa04145	Phagosome	4.99397	0.0193402	0.796602	-1.1821	0.190674	0.334137
path:hsa04020	Calcium signaling pathway	4.05915	0.743812	0.035982	19.2591	0.209236	0.360752
path:hsa04727	GABAergic synapse	11.1931	0.985548	0.00049975	26.8269	0.217115	0.371015
path:hsa04340	Hedgehog signaling pathway	9.21723	0.969051	0.00149925	-15.9991	0.218157	0.371015
path:hsa04728	Dopaminergic synapse	6.26902	0.635112	0.0764618	17.9943	0.221718	0.374524
path:hsa04260	Cardiac muscle contraction	4.57964	0.405793	0.206897	4.33822	0.227702	0.382051
path:hsa04914	Progesterone-mediated oocyte maturation	7.58713	0.795738	0.0304848	22.9167	0.229499	0.382498
path:hsa04114	Oocyte meiosis	4.37808	0.573228	0.116442	-11.9417	0.237916	0.388752
path:hsa04979	Cholesterol metabolism	3.08923	0.394447	0.225887	-1.55057	0.235333	0.388752
path:hsa04514	Cell adhesion molecules (CAMs)	3.11426	0.226981	0.396802	1.50683	0.237458	0.388752
path:hsa00780	Biotin metabolism	2.16353	0.390849	0.238381	-0.201811	0.242255	0.393272
path:hsa04650	Natural killer cell mediated cytotoxicity	5.81925	0.943487	0.00549725	37.1999	0.249042	0.400774
path:hsa00603	Glycosphingolipid biosynthesis - globo and isoglobo series	2.53552	0.901143	0.0124938	-5.35545	0.250083	0.400774
path:hsa04371	Apelin signaling pathway	5.67123	0.755787	0.0544728	22.4268	0.259929	0.4139
path:hsa04922	Glucagon signaling pathway	6.86704	0.0845257	0.682159	-4.80845	0.261911	0.414415
path:hsa00532	Glycosaminoglycan biosynthesis - chondroitin sulfate / dermatan sulfate	0	1	0.274363	-1.83292	0.274363	0.428692
path:hsa04962	Vasopressin-regulated water reabsorption	6.28722	0.126528	0.615192	-1.2163	0.273888	0.428692
path:hsa04550	Signaling pathways regulating pluripotency of stem cells	8.14836	0.676303	0.102449	17.9857	0.283325	0.42928
path:hsa00920	Sulfur metabolism	4.78187	0.774034	0.057971	-4.31254	0.281054	0.42928
path:hsa04122	Sulfur relay system	2.22216	0.733415	0.0754623	-0.973089	0.282663	0.42928
path:hsa04918	Thyroid hormone synthesis	6.4544	0.234762	0.456272	0.937167	0.277904	0.42928
path:hsa03008	Ribosome biogenesis in eukaryotes	2.26799	0.281398	1	0	0.281398	0.42928
path:hsa04911	Insulin secretion	6.86436	0.475426	0.258371	6.82189	0.307814	0.463576
path:hsa04722	Neurotrophin signaling pathway	7.17608	0.281003	0.486757	0.641925	0.332325	0.497492
path:hsa04012	ErbB signaling pathway	8.79781	0.624501	0.17991	14.1225	0.336103	0.500153
path:hsa04919	Thyroid hormone signaling pathway	10.2465	0.662727	0.15992	13.8413	0.34219	0.506198
path:hsa00601	Glycosphingolipid biosynthesis - lacto and neolacto series	1.94556	0.899447	0.0329835	-7.45737	0.345998	0.50882
path:hsa04310	Wnt signaling pathway	4.72211	0.909296	0.0329835	-22.8931	0.36125	0.522801
path:hsa04330	Notch signaling pathway	3.56297	0.676711	0.165917	-6.55769	0.358687	0.522801
path:hsa00130	Ubiquinone and other terpenoid-quinone biosynthesis	3.84542	0.808466	0.0849575	-3.58266	0.361779	0.522801
path:hsa04270	Vascular smooth muscle contraction	4.73327	0.818473	0.0954523	15.7496	0.389096	0.559047
path:hsa04022	cGMP-PKG signaling pathway	6.47937	0.92478	0.0349825	24.8942	0.395671	0.565245
path:hsa04960	Aldosterone-regulated sodium reabsorption	9.9357	0.911895	0.0429785	10.6142	0.398276	0.565732
path:hsa04080	Neuroactive ligand-receptor interaction	6.77263	0.00478593	0.987506	-17.6502	0.402449	0.568431
path:hsa04150	mTOR signaling pathway	5.04659	0.841611	0.0964518	19.2425	0.415744	0.580648
path:hsa04744	Phototransduction	5.91782	0.783813	0.138431	6.31762	0.415379	0.580648
path:hsa00534	Glycosaminoglycan biosynthesis - heparan sulfate / heparin	0	1	0.426287	-0.0563536	0.426287	0.592065
path:hsa04015	Rap1 signaling pathway	5.15411	0.772195	0.166917	20.4547	0.438097	0.605107
path:hsa04014	Ras signaling pathway	5.30721	0.895685	0.0794603	27.7833	0.45738	0.618174
path:hsa04664	Fc epsilon RI signaling pathway	9.12995	0.752503	0.195902	11.927	0.451049	0.618174
path:hsa04392	Hippo signaling pathway - multiple species	3.35765	0.78001	0.177911	-3.95316	0.457449	0.618174
path:hsa04714	Thermogenesis	4.81144	0.420042	0.51974	-0.428918	0.457124	0.618174
path:hsa00563	Glycosylphosphatidylinositol (GPI)-anchor biosynthesis	4.20518	0.23576	0.744628	-4.45831	0.482423	0.648417
path:hsa00565	Ether lipid metabolism	6.18115	0.995739	0.003998	-11.5866	0.493904	0.660299
path:hsa00520	Amino sugar and nucleotide sugar metabolism	4.96041	0.995404	0.00449775	-16.2498	0.497919	0.662127
path:hsa04213	Longevity regulating pathway - multiple species	8.3965	0.752503	0.283358	5.32419	0.530856	0.702191
path:hsa00740	Riboflavin metabolism	4.83335	0.733415	0.308346	1.1902	0.53455	0.703355
path:hsa04720	Long-term potentiation	6.33447	0.616362	0.464768	1.14467	0.558328	0.730796
path:hsa04071	Sphingolipid signaling pathway	9.18898	0.882962	0.196902	12.7649	0.594224	0.76972
path:hsa04978	Mineral absorption	4.56189	0.851605	0.238881	4.10798	0.593196	0.76972
path:hsa04621	NOD-like receptor signaling pathway	4.8919	0.104332	0.955522	-26.6782	0.623137	0.795022
path:hsa04810	Regulation of actin cytoskeleton	4.6335	0.284619	0.844578	-18.5514	0.623297	0.795022
path:hsa04211	Longevity regulating pathway	11.0355	0.855588	0.264868	7.31196	0.620076	0.795022
path:hsa00512	Mucin type O-glycan biosynthesis	2.35588	0.394447	0.785607	-3.96732	0.644378	0.817739
path:hsa04964	Proximal tubule bicarbonate reclamation	2.87777	0.289819	0.864068	-1.53787	0.649984	0.820687
path:hsa00910	Nitrogen metabolism	3.3924	0.316738	0.853573	-3.00534	0.657855	0.824231
path:hsa04913	Ovarian steroidogenesis	5.57413	0.6058	0.622689	-1.54161	0.659385	0.824231
path:hsa04666	Fc gamma R-mediated phagocytosis	7.46977	0.765425	0.456272	1.41499	0.667923	0.830751
path:hsa00980	Metabolism of xenobiotics by cytochrome P450	3.22855	0.174135	0.955022	-6.96902	0.703939	0.871212
path:hsa04370	VEGF signaling pathway	11.2529	0.862747	0.376312	4.28736	0.708779	0.87288
path:hsa00400	Phenylalanine, tyrosine and tryptophan biosynthesis	2.28649	0.562292	0.787106	-1.11225	0.74985	0.918934
path:hsa04670	Leukocyte transendothelial migration	10.1861	0.983296	0.13993	13.7658	0.770351	0.939274
path:hsa00750	Vitamin B6 metabolism	5.81143	0.628972	0.768616	-1.04526	0.773962	0.939274
path:hsa04218	Cellular senescence	5.6191	0.671089	0.785607	-10.0537	0.808588	0.976556
path:hsa04912	GnRH signaling pathway	6.5517	0.674268	0.813093	-13.4964	0.828509	0.995804
path:hsa00230	Purine metabolism	2.99086	0.514538	0.987006	-22.7576	0.94521	1
path:hsa04140	Autophagy - animal	10.0923	0.910545	0.927036	-22.3179	0.976071	1
path:hsa00564	Glycerophospholipid metabolism	2.67226	0.60338	0.974513	-15.8183	0.941255	1
path:hsa00240	Pyrimidine metabolism	2.45507	0.885968	0.97951	-12.1979	0.989204	1
path:hsa04068	FoxO signaling pathway	7.04834	0.834992	0.796602	-11.9891	0.898908	1
path:hsa00600	Sphingolipid metabolism	3.20464	0.960361	0.956022	-10.6104	0.992806	1
path:hsa00562	Inositol phosphate metabolism	6.389	0.875886	0.805597	-8.69623	0.923044	1
path:hsa00830	Retinol metabolism	1.84036	0.70096	0.948526	-6.12828	0.936477	1
path:hsa00982	Drug metabolism - cytochrome P450	2.28582	0.52333	0.966017	-5.69065	0.908571	1
path:hsa04144	Endocytosis	4.51286	0.826539	0.782109	-4.3003	0.888038	1
path:hsa00591	Linoleic acid metabolism	0	1	0.975012	-4.14946	0.975012	1
path:hsa00770	Pantothenate and CoA biosynthesis	5.60494	0.755767	0.810095	-3.94776	0.866686	1
path:hsa00760	Nicotinate and nicotinamide metabolism	5.4255	0.856486	0.746627	-3.80947	0.889201	1
path:hsa00120	Primary bile acid biosynthesis	4.43021	0.901143	0.665667	-2.51452	0.88752	1
path:hsa00515	Mannose type O-glycan biosynthesis	2.61277	0.928984	0.761119	-2.40637	0.938244	1
path:hsa00604	Glycosphingolipid biosynthesis - ganglio series	3.80523	0.901143	0.630185	-1.31246	0.874065	1
path:hsa04070	Phosphatidylinositol signaling system	6.34476	0.940254	0.467266	1.09862	0.851484	1
path:hsa04742	Taste transduction	27.6232	0.986423	0.465767	0.574969	0.93338	1
path:hsa04130	SNARE interactions in vesicular transport	2.10807	0.983979	0.435282	0.397149	0.919353	1
path:hsa02010	ABC transporters	0	1	1	0	1	1
path:hsa00514	Other types of O-glycan biosynthesis	0	1	1	0	1	1
path:hsa00511	Other glycan degradation	0	1	1	0	1	1
remaining	remaining	1.00019	0.999807	1	0	0.999807	1
path:hsa03450	Non-homologous end-joining	0	1	1	0	1	1
path:hsa03420	Nucleotide excision repair	0	1	1	0	1	1
path:hsa04640	Hematopoietic cell lineage	0	1	1	0	1	1
path:hsa03430	Mismatch repair	0	1	1	0	1	1
path:hsa04974	Protein digestion and absorption	0	1	1	0	1	1
path:hsa03410	Base excision repair	0	1	1	0	1	1
path:hsa03060	Protein export	0	1	1	0	1	1
path:hsa03040	Spliceosome	0	1	1	0	1	1
path:hsa03050	Proteasome	0	1	1	0	1	1
path:hsa04146	Peroxisome	0	1	1	0	1	1
path:hsa04142	Lysosome	0	1	1	0	1	1
path:hsa03020	RNA polymerase	0	1	1	0	1	1
path:hsa03022	Basal transcription factors	0	1	1	0	1	1
path:hsa03030	DNA replication	0	1	1	0	1	1
path:hsa04120	Ubiquitin mediated proteolysis	0	1	1	0	1	1
path:hsa04929	GnRH secretion	0	1	1	0	1	1
path:hsa00533	Glycosaminoglycan biosynthesis - keratan sulfate	0	1	1	0	1	1
path:hsa03010	Ribosome	0	1	1	0	1	1

## Sheet: SPIA
Name	ID	pSize	NDE	pNDE	tA	pPERT	pG	pGFdr	pGFWER	Status
Cytokine-cytokine receptor interaction	04060	202	45	0.00478593	73.5595	5e-06	4.43851e-07	4.01854e-05	6.08076e-05	Activated
Pathogenic Escherichia coli infection	05130	52	15	0.00891292	-40.4242	5e-06	7.98879e-07	4.01854e-05	0.000109446	Inhibited
Small cell lung cancer	05222	82	21	0.00987407	-52.5967	5e-06	8.79973e-07	4.01854e-05	0.000120556	Inhibited
Systemic lupus erythematosus	05322	106	35	3.65168e-06	9.59149	0.109	6.26374e-06	0.000214533	0.000858132	Activated
Chemokine signaling pathway	04062	160	27	0.311672	66.5801	5e-06	2.23966e-05	0.000517518	0.00306833	Activated
Viral carcinogenesis	05203	189	54	1.86357e-06	-0.456294	0.847	2.2665e-05	0.000517518	0.00310511	Inhibited
ECM-receptor interaction	04512	79	22	0.00284527	-19.0237	0.002	7.44134e-05	0.0012973	0.0101946	Inhibited
Osteoclast differentiation	04380	127	34	0.000537832	40.3727	0.011	7.71338e-05	0.0012973	0.0105673	Activated
Focal adhesion	04510	192	47	0.000507025	-58.092	0.013	8.52242e-05	0.0012973	0.0116757	Inhibited
Pertussis	05133	69	25	1.44268e-05	7.20802	0.563	0.000103323	0.00141552	0.0141552	Activated
NF-kappa B signaling pathway	04064	85	26	0.000256352	28.385	0.04	0.000128051	0.00159482	0.017543	Activated
Adipocytokine signaling pathway	04920	61	18	0.00336915	20.9434	0.004	0.000164611	0.00187931	0.0225517	Activated
Alcoholism	05034	149	40	0.000171918	-25.1521	0.173	0.000339739	0.00358033	0.0465443	Inhibited
Cocaine addiction	05030	43	17	9.54071e-05	-6.64034	0.364	0.000391316	0.0038293	0.0536103	Inhibited
NOD-like receptor signaling pathway	04621	54	16	0.00530137	-21.252	0.013	0.00072933	0.00666121	0.0999182	Inhibited
Herpes simplex infection	05168	161	42	0.000236973	-10.6916	0.372	0.000911197	0.00780212	0.124834	Inhibited
Circadian rhythm - mammal	04710	22	7	0.0395221	-17.9934	0.004	0.00154173	0.0124246	0.211218	Inhibited
Salmonella infection	05132	79	23	0.0012111	-11.8573	0.153	0.00177766	0.01353	0.24354	Inhibited
Arrhythmogenic right ventricular cardiomyopathy (ARVC)	05412	66	19	0.00357748	-1.29755	0.081	0.00265041	0.0191108	0.363105	Inhibited
Amphetamine addiction	05031	62	19	0.0016204	-7.8485	0.332	0.00458767	0.0302085	0.628511	Inhibited
Legionellosis	05134	53	18	0.000555327	0.174798	0.979	0.00463049	0.0302085	0.634378	Activated
Olfactory transduction	04740	31	6	0.330537	19.1763	0.002	0.00550122	0.0342576	0.753668	Activated
Jak-STAT signaling pathway	04630	121	30	0.00395558	-6.14907	0.228	0.00722494	0.0430355	0.989816	Inhibited
Amyotrophic lateral sclerosis (ALS)	05014	50	7	0.655659	31.6448	0.002	0.0100142	0.0571642	1	Activated
Vibrio cholerae infection	05110	51	13	0.0387084	-4.11877	0.037	0.0108111	0.0592448	1	Inhibited
Apoptosis	04210	80	17	0.092801	33.089	0.022	0.0146874	0.0762168	1	Activated
Dilated cardiomyopathy	05414	77	20	0.00990329	-2.51831	0.216	0.015289	0.0762168	1	Inhibited
Chagas disease (American trypanosomiasis)	05142	98	23	0.0204439	21.3341	0.109	0.015836	0.0762168	1	Activated
Staphylococcus aureus infection	05150	48	14	0.0102116	13.187	0.223	0.0161335	0.0762168	1	Activated
Measles	05162	116	27	0.0142576	-13.1628	0.168	0.016849	0.0763876	1	Inhibited
Complement and coagulation cascades	04610	58	15	0.0244324	29.7938	0.101	0.0172848	0.0763876	1	Activated
MAPK signaling pathway	04010	234	41	0.185106	30.057	0.014	0.0180251	0.0771701	1	Activated
HTLV-I infection	05166	245	51	0.0111678	16.9589	0.268	0.0203867	0.0823632	1	Activated
Rheumatoid arthritis	05323	83	22	0.00545863	-1.80636	0.55	0.0204405	0.0823632	1	Inhibited
B cell receptor signaling pathway	04662	73	18	0.023471	-15.2205	0.15	0.0234092	0.0916304	1	Inhibited
Antigen processing and presentation	04612	59	11	0.281372	7.61382	0.028	0.0460385	0.172325	1	Activated
Tuberculosis	05152	162	34	0.0298956	21.5468	0.267	0.0465402	0.172325	1	Activated
Lysosome	04142	118	23	0.123664	-0.904728	0.069	0.0491819	0.176232	1	Inhibited
Neuroactive ligand-receptor interaction	04080	166	36	0.0162322	1.46105	0.543	0.0505171	0.176232	1	Activated
Toll-like receptor signaling pathway	04620	87	22	0.00979641	1.43991	0.92	0.0514546	0.176232	1	Activated
Endocrine and other factor-regulated calcium reabsorption	04961	43	11	0.0533431	-5.55718	0.219	0.0636641	0.212731	1	Inhibited
Amoebiasis	05146	98	21	0.0625643	-6.45855	0.197	0.066508	0.216943	1	Inhibited
Malaria	05144	45	13	0.0141918	-0.658972	0.92	0.0697017	0.222073	1	Inhibited
Hepatitis C	05160	114	22	0.140188	14.4856	0.108	0.0785843	0.243309	1	Activated
Cholinergic synapse	04725	95	15	0.483113	29.8798	0.032	0.0799189	0.243309	1	Activated
Glioma	05214	65	11	0.402871	-25.3022	0.042	0.0859435	0.255962	1	Inhibited
Leishmaniasis	05140	68	17	0.0239084	-1.83763	0.798	0.0946157	0.270522	1	Inhibited
Protein processing in endoplasmic reticulum	04141	155	26	0.327665	-8.93828	0.06	0.096907	0.270522	1	Inhibited
Gastric acid secretion	04971	62	12	0.22716	-5.93939	0.087	0.0973117	0.270522	1	Inhibited
Shigellosis	05131	59	14	0.056532	-6.85435	0.356	0.0987306	0.270522	1	Inhibited
Gap junction	04540	76	15	0.17302	-16.3788	0.12	0.101209	0.271874	1	Inhibited
African trypanosomiasis	05143	32	5	0.550208	6.33262	0.047	0.120379	0.317152	1	Activated
Asthma	05310	21	5	0.206195	2.0279	0.133	0.12605	0.325827	1	Activated
RIG-I-like receptor signaling pathway	04622	55	13	0.0663088	-4.87035	0.442	0.132764	0.33219	1	Inhibited
T cell receptor signaling pathway	04660	102	21	0.0884623	-11.3047	0.339	0.135157	0.33219	1	Inhibited
Epstein-Barr virus infection	05169	193	37	0.078974	-6.81302	0.382	0.135786	0.33219	1	Inhibited
p53 signaling pathway	04115	64	15	0.0545222	3.14299	0.571	0.139146	0.334438	1	Activated
Prion diseases	05020	30	8	0.0748504	5.70148	0.45	0.147893	0.3478	1	Activated
Salivary secretion	04970	66	13	0.196789	-4.98997	0.174	0.149782	0.3478	1	Inhibited
Vasopressin-regulated water reabsorption	04962	40	8	0.257283	-3.63553	0.159	0.171667	0.391974	1	Inhibited
Influenza A	05164	151	30	0.0729633	-4.79356	0.598	0.180286	0.404905	1	Inhibited
Intestinal immune network for IgA production	04672	37	8	0.191997	2.70319	0.269	0.204694	0.452308	1	Activated
Viral myocarditis	05416	61	14	0.0717109	1.74127	0.756	0.212236	0.46153	1	Activated
Pathways in cancer	05200	296	45	0.530387	-36.0647	0.106	0.218051	0.461757	1	Inhibited
Epithelial cell signaling in Helicobacter pylori infection	05120	65	14	0.10946	-4.00193	0.525	0.221622	0.461757	1	Inhibited
Non-small cell lung cancer	05223	53	10	0.281742	-15.192	0.205	0.222452	0.461757	1	Inhibited
GnRH signaling pathway	04912	85	10	0.852662	-22.0267	0.071	0.230319	0.464369	1	Inhibited
Regulation of actin cytoskeleton	04810	190	36	0.0937191	-7.93867	0.658	0.233472	0.464369	1	Inhibited
Type II diabetes mellitus	04930	41	9	0.161815	-7.07053	0.382	0.233879	0.464369	1	Inhibited
Prostate cancer	05215	86	15	0.326265	-15.0001	0.218	0.259133	0.50716	1	Inhibited
Phototransduction	04744	20	2	0.831509	-8.09601	0.093	0.27527	0.531155	1	Inhibited
Mineral absorption	04978	45	6	0.70096	1.373	0.119	0.29061	0.550757	1	Activated
Sulfur relay system	04122	10	1	0.808466	-1.37229	0.105	0.29426	0.550757	1	Inhibited
Type I diabetes mellitus	04940	36	9	0.0862022	0	1	0.297489	0.550757	1	Inhibited
PPAR signaling pathway	03320	55	10	0.323572	-0.678232	0.286	0.3128	0.570973	1	Inhibited
Acute myeloid leukemia	05221	57	10	0.366557	-5.81212	0.257	0.316744	0.570973	1	Inhibited
Colorectal cancer	05210	61	9	0.595898	6.32195	0.174	0.338679	0.602585	1	Activated
Allograft rejection	05330	30	6	0.301935	2.0279	0.353	0.345205	0.606321	1	Activated
Bile secretion	04976	54	11	0.190509	1.38494	0.577	0.352632	0.611527	1	Activated
Insulin signaling pathway	04910	127	22	0.289338	-19.3053	0.395	0.362184	0.620239	1	Inhibited
Maturity onset diabetes of the young	04950	16	2	0.724627	-2.80455	0.187	0.406346	0.668592	1	Inhibited
Morphine addiction	05032	68	10	0.599707	-3.56295	0.227	0.4076	0.668592	1	Inhibited
Transcriptional misregulation in cancer	05202	155	29	0.136593	0	1	0.408515	0.668592	1	Inhibited
Autoimmune thyroid disease	05320	32	6	0.359449	2.0279	0.382	0.40994	0.668592	1	Activated
Cytosolic DNA-sensing pathway	04623	49	10	0.2038	-0.807513	0.786	0.453555	0.725958	1	Inhibited
Graft-versus-host disease	05332	30	7	0.161366	0	1	0.455711	0.725958	1	Inhibited
Neurotrophin signaling pathway	04722	117	22	0.169863	-0.561572	0.973	0.462797	0.728539	1	Inhibited
Chronic myeloid leukemia	05220	73	12	0.435654	-6.815	0.386	0.467967	0.728539	1	Inhibited
Pancreatic secretion	04972	72	9	0.787359	3.22259	0.24	0.503819	0.767455	1	Activated
Tight junction	04530	110	19	0.312403	3.06599	0.615	0.509061	0.767455	1	Activated
Endometrial cancer	05213	51	9	0.371733	-6.01284	0.518	0.509769	0.767455	1	Inhibited
Bacterial invasion of epithelial cells	05100	68	13	0.228464	1.61575	0.937	0.54405	0.810161	1	Activated
Phosphatidylinositol signaling system	04070	79	11	0.674268	1.46099	0.327	0.553843	0.815876	1	Activated
Alzheimer's disease	05010	142	19	0.764444	-4.7	0.307	0.574863	0.837832	1	Inhibited
Taste transduction	04742	24	4	0.507895	2.9248	0.472	0.582117	0.839474	1	Activated
Leukocyte transendothelial migration	04670	104	14	0.732746	13.4205	0.34	0.595371	0.849644	1	Activated
Toxoplasmosis	05145	121	21	0.292124	-1.22013	0.892	0.611013	0.862977	1	Inhibited
Parkinson's disease	05012	97	16	0.406223	-3.27662	0.664	0.623169	0.868936	1	Inhibited
Notch signaling pathway	04330	45	6	0.70096	7.42482	0.39	0.627917	0.868936	1	Activated
Melanoma	05218	60	9	0.574922	10.5848	0.491	0.639332	0.875885	1	Activated
Calcium signaling pathway	04020	151	20	0.784091	7.13345	0.403	0.680023	0.912705	1	Activated
Melanogenesis	04916	88	14	0.474638	-8.57401	0.685	0.69042	0.912705	1	Inhibited
ErbB signaling pathway	04012	86	14	0.438276	5.71515	0.746	0.692467	0.912705	1	Activated
Fc epsilon RI signaling pathway	04664	67	11	0.444328	-4.16037	0.741	0.695023	0.912705	1	Inhibited
Hedgehog signaling pathway	04340	47	4	0.94157	3.49759	0.354	0.699518	0.912705	1	Activated
Fc gamma R-mediated phagocytosis	04666	89	14	0.492693	3.6323	0.764	0.744199	0.961842	1	Activated
Axon guidance	04360	122	16	0.77861	6.18018	0.497	0.754362	0.965865	1	Activated
Glutamatergic synapse	04724	93	14	0.56328	-1.24928	0.726	0.77461	0.973148	1	Inhibited
Thyroid cancer	05216	27	4	0.6058	1.71154	0.678	0.776207	0.973148	1	Activated
Huntington's disease	05016	158	23	0.627363	2.00963	0.664	0.78136	0.973148	1	Activated
TGF-beta signaling pathway	04350	79	12	0.552057	-2.2925	0.794	0.79986	0.987214	1	Inhibited
Dopaminergic synapse	04728	115	17	0.593158	0.957287	0.82	0.836953	0.999651	1	Activated
Vascular smooth muscle contraction	04270	96	12	0.811272	-4.97655	0.627	0.852507	0.999651	1	Inhibited
Renal cell carcinoma	05211	65	8	0.793174	2.68234	0.651	0.857646	0.999651	1	Activated
Long-term potentiation	04720	64	9	0.655619	-2.87613	0.818	0.870446	0.999651	1	Inhibited
Retrograde endocannabinoid signaling	04723	74	8	0.893777	-0.168992	0.601	0.870983	0.999651	1	Inhibited
Pancreatic cancer	05212	69	9	0.742897	-2.33378	0.733	0.875521	0.999651	1	Inhibited
Bladder cancer	05219	40	6	0.583539	-0.337727	0.949	0.881056	0.999651	1	Inhibited
VEGF signaling pathway	04370	66	9	0.692463	-1.9689	0.807	0.884012	0.999651	1	Inhibited
Basal cell carcinoma	05217	49	7	0.633803	1.38225	0.884	0.884862	0.999651	1	Activated
Cell cycle	04110	121	16	0.767387	3.79437	0.738	0.888334	0.999651	1	Activated
SNARE interactions in vesicular transport	04130	36	4	0.8196	1.27295	0.712	0.897868	0.999651	1	Activated
Aldosterone-regulated sodium reabsorption	04960	34	5	0.606941	0	1	0.910001	0.999651	1	Inhibited
Long-term depression	04730	54	4	0.9734	2.4466	0.653	0.923659	0.999651	1	Activated
Progesterone-mediated oocyte maturation	04914	80	9	0.8779	-1.46056	0.727	0.924833	0.999651	1	Inhibited
Serotonergic synapse	04726	89	9	0.939301	-1.30954	0.708	0.936309	0.999651	1	Inhibited
GABAergic synapse	04727	66	6	0.949426	1.02709	0.705	0.938058	0.999651	1	Activated
Fanconi anemia pathway	03460	46	6	0.721536	0	1	0.957026	0.999651	1	Inhibited
RNA degradation	03018	62	8	0.747069	0	1	0.964913	0.999651	1	Inhibited
Oocyte meiosis	04114	100	13	0.772867	-0.205671	0.987	0.969341	0.999651	1	Inhibited
RNA transport	03013	140	18	0.815454	0	1	0.981815	0.999651	1	Inhibited
Wnt signaling pathway	04310	138	17	0.860031	-0.179754	0.979	0.986798	0.999651	1	Inhibited
Natural killer cell mediated cytotoxicity	04650	107	13	0.847952	-0.187303	0.993	0.986806	0.999651	1	Inhibited
Carbohydrate digestion and absorption	04973	32	3	0.885163	0	1	0.993138	0.999651	1	Inhibited
mTOR signaling pathway	04150	61	6	0.919105	0	1	0.996636	0.999651	1	Inhibited
Regulation of autophagy	04140	22	1	0.97368	0	1	0.999651	0.999651	1	Inhibited
Dorso-ventral axis formation	04320	22	1	0.97368	0	1	0.999651	0.999651	1	Inhibited

## Sheet: Reactome
ID	Description	setSize	enrichmentScore	NES	pvalue	p.adjust	qvalues
R-HSA-372790	Signaling by GPCR	110	0.380272	1.57122	0.000999001	0.0128051	0.00688568
R-HSA-1280215	Cytokine Signaling in Immune system	152	0.393069	1.66313	0.000999001	0.0128051	0.00688568
R-HSA-449147	Signaling by Interleukins	91	0.413262	1.68067	0.000999001	0.0128051	0.00688568
R-HSA-500792	GPCR ligand binding	62	0.456113	1.79756	0.00100503	0.0128051	0.00688568
R-HSA-373076	Class A/1 (Rhodopsin-like receptors)	49	0.491507	1.86319	0.00101317	0.0128051	0.00688568
R-HSA-201722	Formation of the beta-catenin:TCF transactivating complex	19	0.592247	1.8561	0.00111982	0.0128051	0.00688568
R-HSA-5693532	DNA Double-Strand Break Repair	18	0.58935	1.82886	0.00112108	0.0128051	0.00688568
R-HSA-212300	PRC2 methylates histones and DNA	18	0.591044	1.83412	0.00112108	0.0128051	0.00688568
R-HSA-5578749	Transcriptional regulation by small RNAs	18	0.613958	1.90523	0.00112108	0.0128051	0.00688568
R-HSA-73864	RNA Polymerase I Transcription	17	0.59914	1.82285	0.00113507	0.0128051	0.00688568
R-HSA-2559586	DNA Damage/Telomere Stress Induced Senescence	17	0.610002	1.8559	0.00113507	0.0128051	0.00688568
R-HSA-69473	G2/M DNA damage checkpoint	17	0.609112	1.85319	0.00113507	0.0128051	0.00688568
R-HSA-912446	Meiotic recombination	17	0.608923	1.85262	0.00113507	0.0128051	0.00688568
R-HSA-73772	RNA Polymerase I Promoter Escape	17	0.59914	1.82285	0.00113507	0.0128051	0.00688568
R-HSA-73854	RNA Polymerase I Promoter Clearance	17	0.59914	1.82285	0.00113507	0.0128051	0.00688568
R-HSA-427359	SIRT1 negatively regulates rRNA expression	17	0.607739	1.84901	0.00113507	0.0128051	0.00688568
R-HSA-5693538	Homology Directed Repair	16	0.626187	1.8808	0.00114416	0.0128051	0.00688568
R-HSA-73884	Base Excision Repair	16	0.615021	1.84726	0.00114416	0.0128051	0.00688568
R-HSA-2299718	Condensation of Prophase Chromosomes	16	0.625273	1.87805	0.00114416	0.0128051	0.00688568
R-HSA-5693565	Recruitment and ATM-mediated phosphorylation of repair and signaling proteins at DNA double strand breaks	15	0.631354	1.86159	0.0011534	0.0128051	0.00688568
R-HSA-5693567	HDR through Homologous Recombination (HRR) or Single Strand Annealing (SSA)	15	0.639489	1.88558	0.0011534	0.0128051	0.00688568
R-HSA-5693606	DNA Double Strand Break Response	15	0.631354	1.86159	0.0011534	0.0128051	0.00688568
R-HSA-5693607	Processing of DNA double-strand break ends	15	0.639489	1.88558	0.0011534	0.0128051	0.00688568
R-HSA-427389	ERCC6 (CSB) and EHMT2 (G9a) positively regulate rRNA expression	15	0.646154	1.90523	0.0011534	0.0128051	0.00688568
R-HSA-5334118	DNA methylation	15	0.646154	1.90523	0.0011534	0.0128051	0.00688568
R-HSA-5625886	Activated PKN1 stimulates transcription of AR (androgen receptor) regulated genes KLK2 and KLK3	15	0.646154	1.90523	0.0011534	0.0128051	0.00688568
R-HSA-73728	RNA Polymerase I Promoter Opening	15	0.646154	1.90523	0.0011534	0.0128051	0.00688568
R-HSA-909733	Interferon alpha/beta signaling	14	0.607215	1.75882	0.00116414	0.0128051	0.00688568
R-HSA-6783783	Interleukin-10 signaling	14	0.813999	2.35778	0.00116414	0.0128051	0.00688568
R-HSA-110328	Recognition and association of DNA glycosylase with site containing an affected pyrimidine	13	0.663331	1.90175	0.00117509	0.0128051	0.00688568
R-HSA-110329	Cleavage of the damaged pyrimidine	13	0.663331	1.90175	0.00117509	0.0128051	0.00688568
R-HSA-110330	Recognition and association of DNA glycosylase with site containing an affected purine	13	0.663331	1.90175	0.00117509	0.0128051	0.00688568
R-HSA-110331	Cleavage of the damaged purine	13	0.663331	1.90175	0.00117509	0.0128051	0.00688568
R-HSA-171306	Packaging Of Telomere Ends	13	0.663331	1.90175	0.00117509	0.0128051	0.00688568
R-HSA-73927	Depurination	13	0.663331	1.90175	0.00117509	0.0128051	0.00688568
R-HSA-73928	Depyrimidination	13	0.663331	1.90175	0.00117509	0.0128051	0.00688568
R-HSA-73929	Base-Excision Repair, AP Site Formation	13	0.663331	1.90175	0.00117509	0.0128051	0.00688568
R-HSA-5693571	Nonhomologous End-Joining (NHEJ)	12	0.691185	1.94478	0.00119048	0.0128051	0.00688568
R-HSA-380108	Chemokine receptors bind chemokines	10	0.732011	1.96423	0.00120337	0.0128051	0.00688568
R-HSA-2559582	Senescence-Associated Secretory Phenotype (SASP)	27	0.56253	1.90211	0.00213904	0.0175862	0.00945664
R-HSA-198933	Immunoregulatory interactions between a Lymphoid and a non-Lymphoid cell	26	0.565915	1.90057	0.00216216	0.0175862	0.00945664
R-HSA-1474165	Reproduction	23	0.563452	1.84772	0.00219539	0.0175862	0.00945664
R-HSA-8936459	RUNX1 regulates genes involved in megakaryocyte differentiation and platelet function	22	0.581859	1.88586	0.00220507	0.0175862	0.00945664
R-HSA-3214815	HDACs deacetylate histones	22	0.594332	1.92628	0.00220507	0.0175862	0.00945664
R-HSA-1500620	Meiosis	21	0.552342	1.77584	0.00221976	0.0175862	0.00945664
R-HSA-9616222	Transcriptional regulation of granulopoiesis	21	0.556964	1.7907	0.00221976	0.0175862	0.00945664
R-HSA-211000	Gene Silencing by RNA	21	0.564875	1.81613	0.00221976	0.0175862	0.00945664
R-HSA-5250913	Positive epigenetic regulation of rRNA expression	19	0.572391	1.79387	0.00223964	0.0175862	0.00945664
R-HSA-5250924	B-WICH complex positively regulates rRNA expression	19	0.572391	1.79387	0.00223964	0.0175862	0.00945664
R-HSA-5625740	RHO GTPases activate PKNs	19	0.588025	1.84286	0.00223964	0.0175862	0.00945664
R-HSA-1221632	Meiotic synapsis	17	0.591782	1.80046	0.00227015	0.0175862	0.00945664
R-HSA-606279	Deposition of new CENPA-containing nucleosomes at the centromere	16	0.599467	1.80054	0.00228833	0.0175862	0.00945664
R-HSA-774815	Nucleosome assembly	16	0.599467	1.80054	0.00228833	0.0175862	0.00945664
R-HSA-157579	Telomere Maintenance	16	0.603011	1.81119	0.00228833	0.0175862	0.00945664
R-HSA-388396	GPCR downstream signalling	101	0.385341	1.57709	0.003	0.0221925	0.0119336
R-HSA-2559583	Cellular Senescence	46	0.4657	1.7438	0.00305499	0.0221925	0.0119336
R-HSA-2559580	Oxidative Stress Induced Senescence	33	0.506847	1.77935	0.00314136	0.0221925	0.0119336
R-HSA-9018519	Estrogen-dependent gene expression	28	0.537686	1.83611	0.00320856	0.0221925	0.0119336
R-HSA-5617472	Activation of anterior HOX genes in hindbrain development during early embryogenesis	27	0.535262	1.8099	0.00320856	0.0221925	0.0119336
R-HSA-5619507	Activation of HOX genes during differentiation	27	0.535262	1.8099	0.00320856	0.0221925	0.0119336
R-HSA-1912408	Pre-NOTCH Transcription and Translation	21	0.546551	1.75722	0.00332963	0.0222871	0.0119844
R-HSA-1912422	Pre-NOTCH Expression and Processing	21	0.546551	1.75722	0.00332963	0.0222871	0.0119844
R-HSA-375276	Peptide ligand-binding receptors	31	0.493794	1.72006	0.00421941	0.025876	0.0139143
R-HSA-6785807	Interleukin-4 and Interleukin-13 signaling	29	0.498176	1.71984	0.00421941	0.025876	0.0139143
R-HSA-427413	NoRC negatively regulates rRNA expression	20	0.546449	1.74105	0.00442478	0.025876	0.0139143
R-HSA-157858	Gap junction trafficking and regulation	10	-0.782115	-2.89723	0.00584795	0.025876	0.0139143
R-HSA-190828	Gap junction trafficking	10	-0.782115	-2.89723	0.00584795	0.025876	0.0139143
R-HSA-69017	CDK-mediated phosphorylation and removal of Cdc6	10	-0.647655	-2.39914	0.00584795	0.025876	0.0139143
R-HSA-174084	Autodegradation of Cdh1 by Cdh1:APC/C	10	-0.647655	-2.39914	0.00584795	0.025876	0.0139143
R-HSA-174113	SCF-beta-TrCP mediated degradation of Emi1	10	-0.530598	-1.96552	0.00584795	0.025876	0.0139143
R-HSA-174154	APC/C:Cdc20 mediated degradation of Securin	10	-0.647655	-2.39914	0.00584795	0.025876	0.0139143
R-HSA-174178	APC/C:Cdh1 mediated degradation of Cdc20 and other APC/C:Cdh1 targeted proteins in late mitosis/early G1	10	-0.647655	-2.39914	0.00584795	0.025876	0.0139143
R-HSA-174184	Cdc20:Phospho-APC/C mediated degradation of Cyclin A	10	-0.647655	-2.39914	0.00584795	0.025876	0.0139143
R-HSA-176409	APC/C:Cdc20 mediated degradation of mitotic proteins	10	-0.647655	-2.39914	0.00584795	0.025876	0.0139143
R-HSA-176814	Activation of APC/C and APC/C:Cdc20 mediated degradation of mitotic proteins	10	-0.647655	-2.39914	0.00584795	0.025876	0.0139143
R-HSA-179419	APC:Cdc20 mediated degradation of cell cycle proteins prior to satisfation of the cell cycle checkpoint	10	-0.647655	-2.39914	0.00584795	0.025876	0.0139143
R-HSA-5610780	Degradation of GLI1 by the proteasome	10	-0.693709	-2.56974	0.00584795	0.025876	0.0139143
R-HSA-5610783	Degradation of GLI2 by the proteasome	10	-0.693709	-2.56974	0.00584795	0.025876	0.0139143
R-HSA-5610785	GLI3 is processed to GLI3R by the proteasome	10	-0.693709	-2.56974	0.00584795	0.025876	0.0139143
R-HSA-5632684	Hedgehog 'on' state	10	-0.58098	-2.15215	0.00584795	0.025876	0.0139143
R-HSA-71406	Pyruvate metabolism and Citric Acid (TCA) cycle	10	-0.59644	-2.20942	0.00584795	0.025876	0.0139143
R-HSA-168256	Immune System	352	0.30514	1.33494	0.00599401	0.025876	0.0139143
R-HSA-5628897	TP53 Regulates Metabolic Genes	11	-0.4787	-1.88723	0.0060241	0.025876	0.0139143
R-HSA-163200	Respiratory electron transport, ATP synthesis by chemiosmotic coupling, and heat production by uncoupling proteins.	11	-0.701035	-2.76377	0.0060241	0.025876	0.0139143
R-HSA-611105	Respiratory electron transport	11	-0.701035	-2.76377	0.0060241	0.025876	0.0139143
R-HSA-187577	SCF(Skp2)-mediated degradation of p27/p21	11	-0.506141	-1.99541	0.0060241	0.025876	0.0139143
R-HSA-69052	Switching of origins to a post-replicative state	11	-0.628571	-2.47809	0.0060241	0.025876	0.0139143
R-HSA-159236	Transport of Mature mRNA derived from an Intron-Containing Transcript	11	-0.522981	-2.06181	0.0060241	0.025876	0.0139143
R-HSA-72202	Transport of Mature Transcript to Cytoplasm	11	-0.522981	-2.06181	0.0060241	0.025876	0.0139143
R-HSA-5678895	Defective CFTR causes cystic fibrosis	11	-0.471349	-1.85825	0.0060241	0.025876	0.0139143
R-HSA-3000157	Laminin interactions	11	-0.784679	-3.09353	0.0060241	0.025876	0.0139143
R-HSA-1650814	Collagen biosynthesis and modifying enzymes	11	-0.507663	-2.00141	0.0060241	0.025876	0.0139143
R-HSA-195253	Degradation of beta-catenin by the destruction complex	12	-0.541071	-2.20455	0.00617284	0.025876	0.0139143
R-HSA-2187338	Visual phototransduction	12	-0.496126	-2.02142	0.00617284	0.025876	0.0139143
R-HSA-5619084	ABC transporter disorders	12	-0.489943	-1.99623	0.00617284	0.025876	0.0139143
R-HSA-3371497	HSP90 chaperone cycle for steroid hormone receptors (SHR)	12	-0.55945	-2.27943	0.00617284	0.025876	0.0139143
R-HSA-6811436	COPI-independent Golgi-to-ER retrograde traffic	12	-0.683099	-2.78323	0.00617284	0.025876	0.0139143
R-HSA-176408	Regulation of APC/C activators between G1/S and early anaphase	12	-0.490652	-1.99912	0.00617284	0.025876	0.0139143
R-HSA-69239	Synthesis of DNA	12	-0.628832	-2.56212	0.00617284	0.025876	0.0139143
R-HSA-68875	Mitotic Prophase	26	0.517247	1.73713	0.00648649	0.0261747	0.0140749
R-HSA-8939236	RUNX1 regulates transcription of genes involved in differentiation of HSCs	24	0.52754	1.74008	0.00660066	0.0261747	0.0140749
R-HSA-4420097	VEGFA-VEGFR2 Pathway	13	-0.49177	-2.04952	0.00662252	0.0261747	0.0140749
R-HSA-382556	ABC-family proteins mediated transport	13	-0.50359	-2.09878	0.00662252	0.0261747	0.0140749
R-HSA-437239	Recycling pathway of L1	13	-0.750104	-3.12616	0.00662252	0.0261747	0.0140749
R-HSA-191273	Cholesterol biosynthesis	13	-0.697886	-2.90853	0.00662252	0.0261747	0.0140749
R-HSA-446728	Cell junction organization	15	-0.662059	-2.9189	0.00740741	0.0276944	0.0148921
R-HSA-9609507	Protein localization	15	-0.525337	-2.31612	0.00740741	0.0276944	0.0148921
R-HSA-70171	Glycolysis	15	-0.488041	-2.15169	0.00740741	0.0276944	0.0148921
R-HSA-8852276	The role of GTSE1 in G2/M progression after G2 checkpoint	15	-0.732061	-3.22753	0.00740741	0.0276944	0.0148921
R-HSA-1445148	Translocation of SLC2A4 (GLUT4) to the plasma membrane	15	-0.536459	-2.36515	0.00740741	0.0276944	0.0148921
R-HSA-1474290	Collagen formation	15	-0.525687	-2.31766	0.00740741	0.0276944	0.0148921
R-HSA-5250941	Negative epigenetic regulation of rRNA expression	21	0.534572	1.71871	0.00776915	0.0287875	0.0154799
R-HSA-73886	Chromosome Maintenance	19	0.541747	1.69783	0.00783875	0.0287883	0.0154803
R-HSA-69242	S Phase	17	-0.453222	-2.15252	0.00826446	0.0298239	0.0160372
R-HSA-4086400	PCP/CE pathway	17	-0.372566	-1.76946	0.00826446	0.0298239	0.0160372
R-HSA-69481	G2/M Checkpoints	25	0.516052	1.71994	0.00867679	0.030217	0.0162486
R-HSA-6807878	COPI-mediated anterograde transport	18	-0.684801	-3.30291	0.00909091	0.030217	0.0162486
R-HSA-3000171	Non-integrin membrane-ECM interactions	18	-0.417542	-2.01388	0.00909091	0.030217	0.0162486
R-HSA-2426168	Activation of gene expression by SREBF (SREBP)	18	-0.569613	-2.74734	0.00909091	0.030217	0.0162486
R-HSA-70326	Glucose metabolism	19	-0.370686	-1.85178	0.00917431	0.030217	0.0162486
R-HSA-380259	Loss of Nlp from mitotic centrosomes	19	-0.581221	-2.90353	0.00917431	0.030217	0.0162486
R-HSA-380270	Recruitment of mitotic centrosome proteins and complexes	19	-0.581221	-2.90353	0.00917431	0.030217	0.0162486
R-HSA-380284	Loss of proteins required for interphase microtubule organization from the centrosome	19	-0.581221	-2.90353	0.00917431	0.030217	0.0162486
R-HSA-380287	Centrosome maturation	19	-0.581221	-2.90353	0.00917431	0.030217	0.0162486
R-HSA-8854518	AURKA Activation by TPX2	19	-0.581221	-2.90353	0.00917431	0.030217	0.0162486
R-HSA-1655829	Regulation of cholesterol biosynthesis by SREBP (SREBF)	19	-0.578047	-2.88767	0.00917431	0.030217	0.0162486
R-HSA-2565942	Regulation of PLK1 Activity at G2/M Transition	21	-0.583233	-3.11382	0.00990099	0.0318398	0.0171212
R-HSA-380320	Recruitment of NuMA to mitotic centrosomes	21	-0.585227	-3.12447	0.00990099	0.0318398	0.0171212
R-HSA-202733	Cell surface interactions at the vascular wall	21	-0.383309	-2.04645	0.00990099	0.0318398	0.0171212
R-HSA-5663220	RHO GTPases Activate Formins	20	-0.483136	-2.44045	0.0102041	0.0318398	0.0171212
R-HSA-72766	Translation	20	-0.602927	-3.04554	0.0102041	0.0318398	0.0171212
R-HSA-1428517	The citric acid (TCA) cycle and respiratory electron transport	20	-0.643834	-3.25218	0.0102041	0.0318398	0.0171212
R-HSA-3858494	Beta-catenin independent WNT signaling	20	-0.343814	-1.73669	0.0102041	0.0318398	0.0171212
R-HSA-373760	L1CAM interactions	22	-0.59572	-3.16104	0.0105263	0.0323587	0.0174002
R-HSA-5620912	Anchoring of the basal body to the plasma membrane	22	-0.581947	-3.08796	0.0105263	0.0323587	0.0174002
R-HSA-199977	ER to Golgi Anterograde Transport	24	-0.481009	-2.65561	0.0107527	0.032572	0.0175149
R-HSA-948021	Transport to the Golgi and subsequent modification	24	-0.481009	-2.65561	0.0107527	0.032572	0.0175149
R-HSA-162909	Host Interactions of HIV factors	23	-0.567901	-3.04054	0.010989	0.0325746	0.0175163
R-HSA-196854	Metabolism of vitamins and cofactors	23	-0.417493	-2.23526	0.010989	0.0325746	0.0175163
R-HSA-5610787	Hedgehog 'off' state	23	-0.498094	-2.6668	0.010989	0.0325746	0.0175163
R-HSA-8939211	ESR-mediated signaling	34	0.462854	1.63685	0.0115063	0.033866	0.0182108
R-HSA-5687128	MAPK6/MAPK4 signaling	12	-0.469254	-1.91193	0.0123457	0.0354368	0.0190554
R-HSA-2022090	Assembly of collagen fibrils and other multimeric structures	12	-0.465644	-1.89723	0.0123457	0.0354368	0.0190554
R-HSA-1500931	Cell-Cell communication	25	-0.373857	-2.05802	0.0125	0.0354368	0.0190554
R-HSA-6811442	Intra-Golgi and retrograde Golgi-to-ER traffic	25	-0.36229	-1.99434	0.0125	0.0354368	0.0190554
R-HSA-201681	TCF dependent signaling in response to WNT	34	0.461994	1.63381	0.0125523	0.0354368	0.0190554
R-HSA-3214847	HATs acetylate histones	34	0.461644	1.63257	0.0125523	0.0354368	0.0190554
R-HSA-2467813	Separation of Sister Chromatids	26	-0.5118	-2.85061	0.012987	0.0359307	0.019321
R-HSA-2132295	MHC class II antigen presentation	26	-0.366212	-2.03972	0.012987	0.0359307	0.019321
R-HSA-5358351	Signaling by Hedgehog	26	-0.439582	-2.44838	0.012987	0.0359307	0.019321
R-HSA-9006931	Signaling by Nuclear Receptors	41	0.43803	1.59632	0.0133883	0.0367955	0.0197861
R-HSA-69202	Cyclin E associated events during G1/S transition	14	-0.466343	-1.96767	0.013986	0.0379359	0.0203993
R-HSA-69656	Cyclin A:Cdk2-associated events at S phase entry	14	-0.466343	-1.96767	0.013986	0.0379359	0.0203993
R-HSA-194138	Signaling by VEGF	15	-0.403093	-1.77717	0.0148148	0.0392027	0.0210805
R-HSA-114608	Platelet degranulation	28	-0.379992	-2.20144	0.0149254	0.0392027	0.0210805
R-HSA-5617833	Cilium Assembly	28	-0.423509	-2.45356	0.0149254	0.0392027	0.0210805
R-HSA-68877	Mitotic Prometaphase	27	-0.439242	-2.47392	0.0149254	0.0392027	0.0210805
R-HSA-68882	Mitotic Anaphase	28	-0.520221	-3.01385	0.0149254	0.0392027	0.0210805
R-HSA-977225	Amyloid fiber formation	25	0.485606	1.61847	0.0151844	0.0396322	0.0213114
R-HSA-2500257	Resolution of Sister Chromatid Cohesion	16	-0.450684	-2.04739	0.015625	0.0405273	0.0217928
R-HSA-418594	G alpha (i) signalling events	62	0.383402	1.511	0.0170854	0.0438596	0.0235846
R-HSA-3899300	SUMOylation of transcription cofactors	10	-0.496275	-1.83837	0.0175439	0.0438596	0.0235846
R-HSA-4608870	Asymmetric localization of PCP proteins	10	-0.515315	-1.9089	0.0175439	0.0438596	0.0235846
R-HSA-5358346	Hedgehog ligand biogenesis	10	-0.474569	-1.75797	0.0175439	0.0438596	0.0235846
R-HSA-9604323	Negative regulation of NOTCH4 signaling	10	-0.487606	-1.80626	0.0175439	0.0438596	0.0235846
R-HSA-72306	tRNA processing	10	-0.486341	-1.80158	0.0175439	0.0438596	0.0235846
R-HSA-8957322	Metabolism of steroids	30	-0.462263	-2.81577	0.0181818	0.0449134	0.0241513
R-HSA-8856688	Golgi-to-ER retrograde transport	18	-0.350372	-1.68991	0.0181818	0.0449134	0.0241513
R-HSA-76005	Response to elevated platelet cytosolic Ca2+	29	-0.389204	-2.22156	0.0185185	0.045207	0.0243091
R-HSA-2555396	Mitotic Metaphase and Anaphase	29	-0.475066	-2.71165	0.0185185	0.045207	0.0243091
R-HSA-162906	HIV Infection	32	-0.348671	-2.23535	0.0208333	0.0497502	0.0267522
R-HSA-453274	Mitotic G2-G2/M phases	32	-0.567605	-3.63895	0.0208333	0.0497502	0.0267522
R-HSA-69275	G2/M Transition	32	-0.567605	-3.63895	0.0208333	0.0497502	0.0267522
R-HSA-381038	XBP1(S) activates chaperone genes	14	-0.430732	-1.81741	0.020979	0.0497502	0.0267522
R-HSA-381070	IRE1alpha activates chaperones	14	-0.430732	-1.81741	0.020979	0.0497502	0.0267522
R-HSA-450531	Regulation of mRNA stability by proteins that bind AU-rich elements	12	-0.43367	-1.76695	0.0246914	0.0582211	0.0313072
R-HSA-913531	Interferon Signaling	29	0.452679	1.56277	0.0253165	0.0593578	0.0319185
R-HSA-3371556	Cellular response to heat stress	13	-0.398259	-1.6598	0.0264901	0.0604032	0.0324806
R-HSA-174143	APC/C-mediated degradation of cell cycle proteins	13	-0.396602	-1.65289	0.0264901	0.0604032	0.0324806
R-HSA-453276	Regulation of mitotic cell cycle	13	-0.396602	-1.65289	0.0264901	0.0604032	0.0324806
R-HSA-5607761	Dectin-1 mediated noncanonical NF-kB signaling	13	-0.435143	-1.81352	0.0264901	0.0604032	0.0324806
R-HSA-5676590	NIK-->noncanonical NF-kB signaling	13	-0.435143	-1.81352	0.0264901	0.0604032	0.0324806
R-HSA-76002	Platelet activation, signaling and aggregation	40	-0.304326	-2.18092	0.030303	0.0683465	0.036752
R-HSA-1852241	Organelle biogenesis and maintenance	40	-0.319373	-2.28876	0.030303	0.0683465	0.036752
R-HSA-376176	Signaling by ROBO receptors	22	-0.311039	-1.65045	0.0315789	0.0708393	0.0380924
R-HSA-446203	Asparagine N-linked glycosylation	42	-0.515185	-3.84027	0.0344828	0.0769373	0.0413715
R-HSA-72312	rRNA processing	11	-0.413251	-1.6292	0.0361446	0.0797872	0.042904
R-HSA-8939902	Regulation of RUNX2 expression and activity	11	-0.408146	-1.60908	0.0361446	0.0797872	0.042904
R-HSA-72203	Processing of Capped Intron-Containing Pre-mRNA	30	-0.269195	-1.63974	0.0363636	0.0798461	0.0429356
R-HSA-212165	Epigenetic regulation of gene expression	28	0.441613	1.50804	0.0385027	0.0840979	0.045222
R-HSA-199418	Negative regulation of the PI3K/AKT network	15	0.507012	1.49496	0.0392157	0.0847631	0.0455796
R-HSA-6811558	PI5P, PP2A and IER3 Regulate PI3K/AKT Signaling	15	0.507012	1.49496	0.0392157	0.0847631	0.0455796
R-HSA-71387	Metabolism of carbohydrates	43	-0.353301	-2.61615	0.04	0.0860104	0.0462503
R-HSA-211945	Phase I - Functionalization of compounds	20	-0.316682	-1.59964	0.0408163	0.0873133	0.046951
R-HSA-5689880	Ub-specific processing proteases	36	0.409823	1.46507	0.0416233	0.0882228	0.04744
R-HSA-5663205	Infectious disease	45	-0.210467	-1.55347	0.0416667	0.0882228	0.04744
R-HSA-211859	Biological oxidations	33	-0.230128	-1.51109	0.0425532	0.0896425	0.0482035
R-HSA-4551638	SUMOylation of chromatin organization proteins	11	0.545576	1.50847	0.0430622	0.0902566	0.0485337
R-HSA-8866654	E3 ubiquitin ligases ubiquitinate target proteins	12	0.522669	1.47063	0.0440476	0.0918581	0.0493948
R-HSA-8878171	Transcriptional regulation by RUNX1	42	0.392428	1.43819	0.0462487	0.0959661	0.0516038
R-HSA-163685	Integration of energy metabolism	16	-0.352236	-1.60015	0.046875	0.0967817	0.0520424
R-HSA-69618	Mitotic Spindle Checkpoint	12	-0.369194	-1.50425	0.0493827	0.100955	0.0542864
R-HSA-6809371	Formation of the cornified envelope	12	-0.369157	-1.5041	0.0493827	0.100955	0.0542864
R-HSA-109581	Apoptosis	25	-0.275419	-1.51613	0.05	0.101716	0.0546956
R-HSA-400253	Circadian Clock	20	0.467383	1.48914	0.050885	0.103011	0.0553921
R-HSA-2029480	Fcgamma receptor (FCGR) dependent phagocytosis	15	-0.352718	-1.55507	0.0518519	0.104459	0.0561706
R-HSA-425407	SLC-mediated transmembrane transport	29	0.42928	1.48199	0.0537975	0.107855	0.0579968
R-HSA-69206	G1/S Transition	18	-0.317325	-1.53051	0.0545455	0.108073	0.058114
R-HSA-8878166	Transcriptional regulation by RUNX2	16	-0.332365	-1.50988	0.0546875	0.108073	0.058114
R-HSA-196849	Metabolism of water-soluble vitamins and cofactors	16	-0.326577	-1.48359	0.0546875	0.108073	0.058114
R-HSA-212436	Generic Transcription Pathway	245	0.283178	1.2246	0.0579421	0.113962	0.0612807
R-HSA-3371453	Regulation of HSF1-mediated heat shock response	10	-0.397765	-1.47346	0.0584795	0.114476	0.0615574
R-HSA-162582	Signal Transduction	345	0.274929	1.20299	0.0619381	0.120677	0.0648919
R-HSA-3781865	Diseases of glycosylation	14	-0.329918	-1.39205	0.0699301	0.135612	0.0729227
R-HSA-8878159	Transcriptional regulation by RUNX3	15	-0.332227	-1.46473	0.0740741	0.14298	0.0768847
R-HSA-1483206	Glycerophospholipid biosynthesis	14	-0.325622	-1.37392	0.0769231	0.14777	0.0794603
R-HSA-877300	Interferon gamma signaling	19	0.455674	1.42808	0.0772676	0.14777	0.0794603
R-HSA-5668541	TNFR2 non-canonical NF-kB pathway	20	0.447958	1.42725	0.0840708	0.160043	0.0860599
R-HSA-73857	RNA Polymerase II Transcription	264	0.27463	1.1925	0.0849151	0.160912	0.0865273
R-HSA-5619102	SLC transporter disorders	11	0.511644	1.41465	0.0861244	0.162462	0.0873606
R-HSA-73894	DNA Repair	36	0.381835	1.36501	0.0874089	0.164139	0.0882624
R-HSA-9612973	Autophagy	13	-0.323341	-1.34756	0.0927152	0.172542	0.0927809
R-HSA-6805567	Keratinization	13	-0.320538	-1.33588	0.0927152	0.172542	0.0927809
R-HSA-73887	Death Receptor Signalling	21	0.432262	1.38977	0.0932297	0.172725	0.0928793
R-HSA-5688426	Deubiquitination	48	0.353568	1.33185	0.0946083	0.1745	0.0938338
R-HSA-6811434	COPI-dependent Golgi-to-ER retrograde traffic	12	-0.327576	-1.33468	0.0987654	0.181121	0.0973944
R-HSA-69620	Cell Cycle Checkpoints	40	0.370006	1.34591	0.0990712	0.181121	0.0973944
R-HSA-2219530	Constitutive Signaling by Aberrant PI3K in Cancer	10	0.51807	1.39016	0.0998797	0.181799	0.0977585
R-HSA-195721	Signaling by WNT	47	0.353517	1.32898	0.101729	0.184357	0.0991341
R-HSA-425393	Transport of inorganic cations/anions and amino acids/oligopeptides	16	0.455129	1.36701	0.102975	0.185802	0.0999115
R-HSA-5357801	Programmed Cell Death	26	-0.240476	-1.3394	0.103896	0.186653	0.100369
R-HSA-69541	Stabilization of p53	11	-0.339073	-1.33676	0.108434	0.193966	0.104301
R-HSA-8978868	Fatty acid metabolism	31	-0.209954	-1.30454	0.111111	0.197902	0.106418
R-HSA-69002	DNA Replication Pre-Initiation	11	-0.336462	-1.32647	0.114458	0.202991	0.109155
R-HSA-3214858	RMTs methylate histone arginines	17	0.44711	1.36031	0.115778	0.204458	0.109943
R-HSA-74160	Gene expression (Transcription)	281	0.267718	1.16438	0.117882	0.207293	0.111467
R-HSA-8852135	Protein ubiquitination	16	0.441995	1.32756	0.118993	0.208364	0.112043
R-HSA-141424	Amplification of signal from the kinetochores	10	-0.352649	-1.30633	0.122807	0.212354	0.114189
R-HSA-141444	Amplification of signal from unattached kinetochores via a MAD2 inhibitory signal	10	-0.352649	-1.30633	0.122807	0.212354	0.114189
R-HSA-917937	Iron uptake and transport	10	-0.351246	-1.30114	0.122807	0.212354	0.114189
R-HSA-3247509	Chromatin modifying enzymes	54	0.334921	1.28535	0.126888	0.217598	0.117009
R-HSA-4839726	Chromatin organization	54	0.334921	1.28535	0.126888	0.217598	0.117009
R-HSA-3700989	Transcriptional Regulation by TP53	49	-0.155214	-1.19383	0.133333	0.226776	0.121944
R-HSA-388841	Costimulation by the CD28 family	12	0.470442	1.32368	0.133333	0.226776	0.121944
R-HSA-3214841	PKMTs methylate histone lysines	15	0.443177	1.30674	0.137255	0.232493	0.125018
R-HSA-428157	Sphingolipid metabolism	11	-0.326655	-1.28781	0.138554	0.23374	0.125689
R-HSA-416476	G alpha (q) signalling events	32	0.371707	1.30167	0.144654	0.243042	0.130691
R-HSA-168898	Toll-like Receptor Cascades	35	0.356719	1.26707	0.157785	0.264035	0.141979
R-HSA-69306	DNA Replication	14	-0.30051	-1.26796	0.160839	0.268065	0.144147
R-HSA-71291	Metabolism of amino acids and derivatives	44	-0.177385	-1.30439	0.166667	0.276667	0.148772
R-HSA-70263	Gluconeogenesis	10	-0.335228	-1.2418	0.169591	0.280399	0.150779
R-HSA-390466	Chaperonin-mediated protein folding	13	-0.299732	-1.24917	0.172185	0.282439	0.151876
R-HSA-391251	Protein folding	13	-0.299732	-1.24917	0.172185	0.282439	0.151876
R-HSA-983189	Kinesins	10	-0.325579	-1.20606	0.181287	0.296197	0.159274
R-HSA-157118	Signaling by NOTCH	42	0.335485	1.22951	0.192189	0.312778	0.16819
R-HSA-2672351	Stimuli-sensing channels	13	0.434993	1.24711	0.19859	0.321933	0.173113
R-HSA-2219528	PI3K/AKT Signaling in Cancer	15	0.417366	1.23063	0.204152	0.329662	0.177269
R-HSA-6807070	PTEN Regulation	17	0.40331	1.22705	0.211124	0.339598	0.182612
R-HSA-5668914	Diseases of metabolism	19	-0.24414	-1.21962	0.220183	0.352804	0.189713
R-HSA-2262752	Cellular responses to stress	89	0.288547	1.16991	0.236	0.376692	0.202559
R-HSA-9006934	Signaling by Receptor Tyrosine Kinases	67	-0.145916	-1.51456	0.25	0.395992	0.212937
R-HSA-8953854	Metabolism of RNA	67	-0.300587	-3.12	0.25	0.395992	0.212937
R-HSA-8953897	Cellular responses to external stimuli	90	0.284584	1.15556	0.253	0.399221	0.214673
R-HSA-2029482	Regulation of actin dynamics for phagocytic cup formation	11	-0.294804	-1.16224	0.259036	0.407197	0.218962
R-HSA-418555	G alpha (s) signalling events	17	0.387734	1.17966	0.267877	0.419506	0.225581
R-HSA-162587	HIV Life Cycle	17	-0.249739	-1.1861	0.272727	0.425496	0.228802
R-HSA-166658	Complement cascade	15	0.394877	1.16432	0.286044	0.4446	0.239075
R-HSA-74752	Signaling by Insulin receptor	10	0.431797	1.15866	0.287605	0.445359	0.239483
R-HSA-5684996	MAPK1/MAPK3 signaling	45	0.310744	1.15716	0.292434	0.451152	0.242598
R-HSA-1257604	PIP3 activates AKT signaling	37	0.317721	1.14158	0.308012	0.473427	0.254576
R-HSA-195258	RHO GTPase Effectors	55	0.293188	1.12981	0.309476	0.473921	0.254841
R-HSA-1236975	Antigen processing-Cross presentation	16	-0.242799	-1.10299	0.3125	0.476792	0.256385
R-HSA-168643	Nucleotide-binding domain, leucine rich repeat containing receptor (NLR) signaling pathways	11	0.408465	1.12937	0.320574	0.486939	0.261842
R-HSA-2644602	Signaling by NOTCH1 PEST Domain Mutants in Cancer	12	0.40386	1.13634	0.32619	0.486939	0.261842
R-HSA-2644603	Signaling by NOTCH1 in Cancer	12	0.40386	1.13634	0.32619	0.486939	0.261842
R-HSA-2644606	Constitutive Signaling by NOTCH1 PEST Domain Mutants	12	0.40386	1.13634	0.32619	0.486939	0.261842
R-HSA-2894858	Signaling by NOTCH1 HD+PEST Domain Mutants in Cancer	12	0.40386	1.13634	0.32619	0.486939	0.261842
R-HSA-2894862	Constitutive Signaling by NOTCH1 HD+PEST Domain Mutants	12	0.40386	1.13634	0.32619	0.486939	0.261842
R-HSA-425366	Transport of bile salts and organic acids, metal ions and amine compounds	11	0.403928	1.11683	0.328947	0.489294	0.263108
R-HSA-381340	Transcriptional regulation of white adipocyte differentiation	19	0.358034	1.12208	0.333707	0.494601	0.265962
R-HSA-75153	Apoptotic execution phase	10	-0.294174	-1.08972	0.339181	0.500926	0.269363
R-HSA-1834949	Cytosolic sensors of pathogen-associated DNA	11	0.399582	1.10481	0.344498	0.506973	0.272615
R-HSA-5607764	CLEC7A (Dectin-1) signaling	20	-0.214694	-1.08448	0.346939	0.508762	0.273576
R-HSA-373755	Semaphorin interactions	12	-0.262214	-1.06837	0.351852	0.51415	0.276474
R-HSA-68886	M Phase	62	0.278309	1.09683	0.354774	0.516601	0.277792
R-HSA-2142753	Arachidonic acid metabolism	10	0.413245	1.10888	0.357401	0.517968	0.278527
R-HSA-8957275	Post-translational protein phosphorylation	27	-0.193641	-1.09064	0.358209	0.517968	0.278527
R-HSA-977606	Regulation of Complement cascade	14	0.377993	1.09487	0.370198	0.532551	0.286369
R-HSA-156580	Phase II - Conjugation of compounds	13	-0.253212	-1.05529	0.370861	0.532551	0.286369
R-HSA-9010553	Regulation of expression of SLITs and ROBOs	16	-0.232145	-1.0546	0.375	0.536638	0.288566
R-HSA-216083	Integrin cell surface interactions	25	0.327825	1.0926	0.37961	0.541368	0.29111
R-HSA-2980736	Peptide hormone metabolism	11	-0.264343	-1.04215	0.391566	0.556246	0.29911
R-HSA-5673001	RAF/MAP kinase cascade	43	0.293016	1.07985	0.394063	0.556246	0.29911
R-HSA-9607240	FLT3 Signaling	43	0.293016	1.07985	0.394063	0.556246	0.29911
R-HSA-194315	Signaling by Rho GTPases	64	0.270974	1.06972	0.400602	0.563559	0.303043
R-HSA-983712	Ion channel transport	23	0.328035	1.07572	0.405049	0.56789	0.305372
R-HSA-166520	Signaling by NTRKs	15	-0.233513	-1.02952	0.407407	0.568993	0.305965
R-HSA-1442490	Collagen degradation	10	0.397911	1.06773	0.409146	0.568993	0.305965
R-HSA-69563	p53-Dependent G1 DNA Damage Response	12	-0.253167	-1.03151	0.41358	0.568993	0.305965
R-HSA-69580	p53-Dependent G1/S DNA damage checkpoint	12	-0.253167	-1.03151	0.41358	0.568993	0.305965
R-HSA-69615	G1/S DNA Damage Checkpoints	12	-0.253167	-1.03151	0.41358	0.568993	0.305965
R-HSA-438064	Post NMDA receptor activation events	16	-0.220271	-1.00066	0.414062	0.568993	0.305965
R-HSA-8856828	Clathrin-mediated endocytosis	22	-0.191348	-1.01534	0.421053	0.576689	0.310103
R-HSA-375165	NCAM signaling for neurite out-growth	10	0.391491	1.0505	0.433213	0.591393	0.31801
R-HSA-446652	Interleukin-1 family signaling	24	0.320055	1.0557	0.438944	0.597252	0.32116
R-HSA-8986944	Transcriptional Regulation by MECP2	11	0.372917	1.03109	0.442584	0.598717	0.321948
R-HSA-168928	DDX58/IFIH1-mediated induction of interferon-alpha/beta	15	0.350372	1.0331	0.442907	0.598717	0.321948
R-HSA-166016	Toll Like Receptor 4 (TLR4) Cascade	29	0.3023	1.04362	0.447257	0.602636	0.324055
R-HSA-5683057	MAPK family signaling cascades	49	0.275228	1.04332	0.45998	0.617772	0.332195
R-HSA-1236974	ER-Phagosome pathway	15	-0.226761	-0.999749	0.466667	0.624283	0.335696
R-HSA-422356	Regulation of insulin secretion	10	-0.271201	-1.00462	0.467836	0.624283	0.335696
R-HSA-168249	Innate Immune System	188	0.23518	1.00639	0.476523	0.633837	0.340833
R-HSA-109582	Hemostasis	90	-0.255954	-3.48605	0.5	0.654574	0.351984
R-HSA-199991	Membrane Trafficking	74	-0.274099	-1.86054	0.5	0.654574	0.351984
R-HSA-5653656	Vesicle-mediated transport	82	-0.257951	-3.70255	0.5	0.654574	0.351984
R-HSA-556833	Metabolism of lipids	103	-0.184702	-2.12319	0.5	0.654574	0.351984
R-HSA-422475	Axon guidance	79	-0.228932	-3.35297	0.5	0.654574	0.351984
R-HSA-1169091	Activation of NF-kappaB in B cells	16	0.332258	0.997959	0.506865	0.661475	0.355695
R-HSA-9614085	FOXO-mediated transcription	17	0.325029	0.988884	0.515323	0.669911	0.360231
R-HSA-6807505	RNA polymerase II transcribes snRNA genes	12	0.34671	0.975533	0.517857	0.669911	0.360231
R-HSA-5674135	MAP2K and MAPK activation	10	0.365054	0.979563	0.518652	0.669911	0.360231
R-HSA-1474228	Degradation of the extracellular matrix	27	0.290734	0.98307	0.519786	0.669911	0.360231
R-HSA-112315	Transmission across Chemical Synapses	39	0.271817	0.98536	0.526915	0.676996	0.364041
R-HSA-5633007	Regulation of TP53 Activity	19	-0.191525	-0.956773	0.53211	0.681561	0.366496
R-HSA-6806834	Signaling by MET	12	0.341822	0.961781	0.535714	0.682171	0.366824
R-HSA-442755	Activation of NMDA receptors and postsynaptic events	18	0.313624	0.973236	0.535874	0.682171	0.366824
R-HSA-73856	RNA Polymerase II Transcription Termination	12	0.338442	0.952271	0.547619	0.694991	0.373717
R-HSA-163125	Post-translational modification: synthesis of GPI-anchored proteins	12	0.336175	0.94589	0.559524	0.706937	0.380141
R-HSA-1280218	Adaptive Immune System	114	0.236938	0.980865	0.56044	0.706937	0.380141
R-HSA-1474244	Extracellular matrix organization	61	0.247713	0.974622	0.56338	0.708493	0.380978
R-HSA-168138	Toll Like Receptor 9 (TLR9) Cascade	20	0.297606	0.948206	0.571903	0.711078	0.382368
R-HSA-168181	Toll Like Receptor 7/8 (TLR7/8) Cascade	20	0.297606	0.948206	0.571903	0.711078	0.382368
R-HSA-975155	MyD88 dependent cascade initiated on endosome	20	0.297606	0.948206	0.571903	0.711078	0.382368
R-HSA-187037	Signaling by NTRK1 (TRKA)	11	-0.233126	-0.91908	0.572289	0.711078	0.382368
R-HSA-72187	mRNA 3'-end processing	11	0.338302	0.935379	0.577751	0.715722	0.384865
R-HSA-194840	Rho GTPase cycle	10	0.345048	0.925879	0.581227	0.717885	0.386028
R-HSA-193704	p75 NTR receptor-mediated signalling	13	0.319408	0.91573	0.59812	0.736415	0.395993
R-HSA-168179	Toll Like Receptor TLR1:TLR2 Cascade	21	0.286082	0.919785	0.601554	0.736415	0.395993
R-HSA-181438	Toll Like Receptor 2 (TLR2) Cascade	21	0.286082	0.919785	0.601554	0.736415	0.395993
R-HSA-2173793	Transcriptional activity of SMAD2/SMAD3:SMAD4 heterotrimer	12	0.322507	0.907433	0.603571	0.736712	0.396152
R-HSA-9006925	Intracellular signaling by second messengers	44	0.252281	0.935808	0.606339	0.73729	0.396463
R-HSA-112316	Neuronal System	52	0.244789	0.935122	0.609312	0.73729	0.396463
R-HSA-9013694	Signaling by NOTCH4	16	-0.197672	-0.897993	0.609375	0.73729	0.396463
R-HSA-5696398	Nucleotide Excision Repair	11	-0.2294	-0.904387	0.620482	0.748547	0.402516
R-HSA-2682334	EPH-Ephrin signaling	18	0.291187	0.903608	0.624439	0.751137	0.403909
R-HSA-2151201	Transcriptional activation of mitochondrial biogenesis	10	0.33078	0.887594	0.632972	0.759201	0.408245
R-HSA-382551	Transport of small molecules	88	0.231064	0.936226	0.635	0.759438	0.408373
R-HSA-674695	RNA Polymerase II Pre-transcription Events	10	0.328228	0.880747	0.637786	0.760578	0.408985
R-HSA-1168372	Downstream signaling events of B Cell Receptor (BCR)	19	0.280815	0.88007	0.649496	0.770274	0.414199
R-HSA-72172	mRNA Splicing	24	0.265612	0.876118	0.650165	0.770274	0.414199
R-HSA-1980143	Signaling by NOTCH1	14	0.30064	0.870814	0.658906	0.770274	0.414199
R-HSA-166166	MyD88-independent TLR4 cascade	21	0.271319	0.872319	0.661487	0.770274	0.414199
R-HSA-168164	Toll Like Receptor 3 (TLR3) Cascade	21	0.271319	0.872319	0.661487	0.770274	0.414199
R-HSA-937061	TRIF(TICAM1)-mediated TLR4 signaling	21	0.271319	0.872319	0.661487	0.770274	0.414199
R-HSA-5619115	Disorders of transmembrane transporters	23	0.265691	0.871277	0.66191	0.770274	0.414199
R-HSA-8856825	Cargo recognition for clathrin-mediated endocytosis	16	-0.190871	-0.867098	0.664062	0.770274	0.414199
R-HSA-3000178	ECM proteoglycans	19	0.277632	0.870095	0.665174	0.770274	0.414199
R-HSA-72163	mRNA Splicing - Major Pathway	23	0.265501	0.870656	0.665203	0.770274	0.414199
R-HSA-1266738	Developmental Biology	152	0.221082	0.935429	0.666334	0.770274	0.414199
R-HSA-975138	TRAF6 mediated induction of NFkB and MAP kinases upon TLR7/8 or 9 activation	19	0.275277	0.862714	0.673012	0.775834	0.417189
R-HSA-1630316	Glycosaminoglycan metabolism	14	0.294358	0.852619	0.683353	0.784385	0.421787
R-HSA-453279	Mitotic G1-G1/S phases	22	-0.15567	-0.826026	0.684211	0.784385	0.421787
R-HSA-3928665	EPH-ephrin mediated repulsion of cells	12	0.302786	0.851945	0.686905	0.785304	0.422282
R-HSA-9020702	Interleukin-1 signaling	19	0.267735	0.839079	0.699888	0.797669	0.42893
R-HSA-2122947	NOTCH1 Intracellular Domain Regulates Transcription	10	0.305357	0.819377	0.701564	0.797669	0.42893
R-HSA-983231	Factors involved in megakaryocyte development and platelet production	26	0.244689	0.821764	0.707027	0.801684	0.431089
R-HSA-3108232	SUMO E3 ligases SUMOylate target proteins	28	0.239366	0.817397	0.719786	0.813927	0.437673
R-HSA-168142	Toll Like Receptor 10 (TLR10) Cascade	18	0.261829	0.812506	0.732063	0.818904	0.440349
R-HSA-168176	Toll Like Receptor 5 (TLR5) Cascade	18	0.261829	0.812506	0.732063	0.818904	0.440349
R-HSA-975871	MyD88 cascade initiated on plasma membrane	18	0.261829	0.812506	0.732063	0.818904	0.440349
R-HSA-1592230	Mitochondrial biogenesis	12	0.284395	0.800199	0.735714	0.818904	0.440349
R-HSA-9006936	Signaling by TGF-beta family members	24	0.244266	0.805708	0.737074	0.818904	0.440349
R-HSA-2990846	SUMOylation	29	0.23182	0.800307	0.737342	0.818904	0.440349
R-HSA-69278	Cell Cycle, Mitotic	76	0.211042	0.847231	0.738	0.818904	0.440349
R-HSA-6804756	Regulation of TP53 Activity through Phosphorylation	14	-0.191128	-0.806437	0.741259	0.820326	0.441114
R-HSA-6794362	Protein-protein interactions at synapses	12	0.281758	0.79278	0.747619	0.825165	0.443716
R-HSA-5173105	O-linked glycosylation	14	0.273702	0.792787	0.759022	0.835528	0.449289
R-HSA-112314	Neurotransmitter receptors and postsynaptic signal transmission	30	0.225394	0.782242	0.762408	0.837035	0.450099
R-HSA-1989781	PPARA activates gene expression	20	0.244895	0.780261	0.769912	0.837654	0.450432
R-HSA-6802946	Signaling by moderate kinase activity BRAF mutants	12	0.275314	0.774646	0.77381	0.837654	0.450432
R-HSA-6802949	Signaling by RAS mutants	12	0.275314	0.774646	0.77381	0.837654	0.450432
R-HSA-6802955	Paradoxical activation of RAF signaling by kinase inactive BRAF	12	0.275314	0.774646	0.77381	0.837654	0.450432
R-HSA-9649948	Signaling downstream of RAS mutants	12	0.275314	0.774646	0.77381	0.837654	0.450432
R-HSA-397014	Muscle contraction	22	0.238738	0.773772	0.775083	0.837654	0.450432
R-HSA-202403	TCR signaling	18	0.240438	0.746125	0.786996	0.84463	0.454183
R-HSA-202424	Downstream TCR signaling	18	0.240438	0.746125	0.786996	0.84463	0.454183
R-HSA-400206	Regulation of lipid metabolism by Peroxisome proliferator-activated receptor alpha (PPARalpha)	21	0.236286	0.759686	0.791343	0.84463	0.454183
R-HSA-166058	MyD88:MAL(TIRAP) cascade initiated on plasma membrane	19	0.240547	0.753872	0.791713	0.84463	0.454183
R-HSA-168188	Toll Like Receptor TLR6:TLR2 Cascade	19	0.240547	0.753872	0.791713	0.84463	0.454183
R-HSA-381119	Unfolded Protein Response (UPR)	23	0.232217	0.761505	0.795829	0.846843	0.455373
R-HSA-983705	Signaling by the B Cell Receptor (BCR)	26	0.216134	0.725867	0.825946	0.874556	0.470275
R-HSA-6802952	Signaling by BRAF and RAF fusions	13	0.254851	0.730648	0.826087	0.874556	0.470275
R-HSA-170834	Signaling by TGF-beta Receptor Complex	18	0.220322	0.683702	0.838565	0.885508	0.476164
R-HSA-373080	Class B/2 (Secretin family receptors)	10	0.250923	0.67331	0.864019	0.910071	0.489372
R-HSA-162599	Late Phase of HIV Life Cycle	15	0.23061	0.679968	0.868512	0.912487	0.490672
R-HSA-381426	Regulation of Insulin-like Growth Factor (IGF) transport and uptake by Insulin-like Growth Factor Binding Proteins (IGFBPs)	28	0.195216	0.66663	0.880214	0.917736	0.493494
R-HSA-5621481	C-type lectin receptors (CLRs)	25	0.196873	0.656154	0.880694	0.917736	0.493494
R-HSA-9609736	Assembly and cell surface presentation of NMDA receptors	12	0.234229	0.659046	0.880952	0.917736	0.493494
R-HSA-1483257	Phospholipid metabolism	21	0.20364	0.654725	0.882353	0.917736	0.493494
R-HSA-5689603	UCH proteinases	19	0.206647	0.64763	0.888018	0.921319	0.495421
R-HSA-6798695	Neutrophil degranulation	97	0.179221	0.731971	0.891892	0.92303	0.496341
R-HSA-111885	Opioid Signalling	14	-0.166915	-0.704275	0.895105	0.924051	0.49689
R-HSA-5663202	Diseases of signal transduction	59	0.169158	0.661316	0.900702	0.927522	0.498756
R-HSA-1640170	Cell Cycle	89	0.172397	0.698978	0.903	0.927587	0.498791
R-HSA-6802957	Oncogenic MAPK signaling	14	0.213244	0.617669	0.911525	0.934032	0.502257
R-HSA-2454202	Fc epsilon receptor (FCERI) signaling	23	0.180788	0.592857	0.923161	0.943626	0.507416
R-HSA-983168	Antigen processing: Ubiquitination & Proteasome degradation	30	0.156632	0.543601	0.955649	0.974434	0.523982
R-HSA-448424	Interleukin-17 signaling	15	0.183438	0.540878	0.958478	0.974922	0.524245
R-HSA-450294	MAP kinase activation	13	0.176544	0.506144	0.971798	0.986054	0.530231
R-HSA-8951664	Neddylation	23	0.134613	0.441436	0.979144	0.990917	0.532846
R-HSA-983169	Class I MHC mediated antigen processing & presentation	39	0.132083	0.47881	0.981366	0.990917	0.532846
R-HSA-2871837	FCERI mediated NF-kB activation	15	0.154708	0.456166	0.986159	0.99334	0.534149
R-HSA-597592	Post-translational protein modification	206	0.138205	0.593579	0.993007	0.996407	0.535798
R-HSA-1643685	Disease	148	0.123033	0.519748	0.994006	0.996407	0.535798
R-HSA-392499	Metabolism of proteins	275	0.132027	0.57373	0.998002	0.998002	0.536655

## Sheet: GO
ontology	node_id	node_name	raw_p_overrep	FWER_overrep
cellular_component	GO:0043227	membrane-bounded organelle	5.36751e-33	0
biological_process	GO:0006357	regulation of transcription by RNA polymerase II	8.68193e-32	0
molecular_function	GO:0000981	DNA-binding transcription factor activity, RNA polymerase II-specific	1.49708e-31	0
biological_process	GO:0006366	transcription by RNA polymerase II	2.81838e-31	0
molecular_function	GO:0003700	DNA-binding transcription factor activity	4.24957e-31	0
molecular_function	GO:0140110	transcription regulator activity	2.0662e-30	0
biological_process	GO:0080090	regulation of primary metabolic process	1.75387e-29	0
biological_process	GO:0097659	nucleic acid-templated transcription	2.51711e-29	0
biological_process	GO:0032774	RNA biosynthetic process	3.8486e-29	0
biological_process	GO:0031323	regulation of cellular metabolic process	4.11747e-29	0
biological_process	GO:1903506	regulation of nucleic acid-templated transcription	4.16539e-29	0
biological_process	GO:0051252	regulation of RNA metabolic process	4.18135e-29	0
biological_process	GO:2001141	regulation of RNA biosynthetic process	6.21527e-29	0
biological_process	GO:1901362	organic cyclic compound biosynthetic process	8.37056e-29	0
cellular_component	GO:0043226	organelle	8.48046e-29	0
biological_process	GO:0006355	regulation of transcription, DNA-templated	1.34023e-28	0
biological_process	GO:0006351	transcription, DNA-templated	2.28766e-28	0
biological_process	GO:0018130	heterocycle biosynthetic process	1.07827e-27	0
biological_process	GO:0051171	regulation of nitrogen compound metabolic process	1.76302e-27	0
biological_process	GO:0034654	nucleobase-containing compound biosynthetic process	1.80379e-27	0
biological_process	GO:0019438	aromatic compound biosynthetic process	3.86454e-27	0
biological_process	GO:0019219	regulation of nucleobase-containing compound metabolic process	6.11947e-27	0
biological_process	GO:0009889	regulation of biosynthetic process	3.45799e-26	0
biological_process	GO:0044237	cellular metabolic process	1.78692e-25	0
biological_process	GO:0031326	regulation of cellular biosynthetic process	1.2495e-24	0
biological_process	GO:0044238	primary metabolic process	2.19985e-24	0
biological_process	GO:0010556	regulation of macromolecule biosynthetic process	5.37564e-24	0
cellular_component	GO:0043229	intracellular organelle	9.79887e-24	0
biological_process	GO:2000112	regulation of cellular macromolecule biosynthetic process	1.16266e-23	0
cellular_component	GO:0043231	intracellular membrane-bounded organelle	2.0215e-23	0
biological_process	GO:1901360	organic cyclic compound metabolic process	5.14751e-23	0
biological_process	GO:0006807	nitrogen compound metabolic process	9.8186e-23	0
biological_process	GO:0044260	cellular macromolecule metabolic process	3.63383e-22	0
cellular_component	GO:0005634	nucleus	4.5466e-22	0
biological_process	GO:0016070	RNA metabolic process	1.20541e-21	0
cellular_component	GO:0005622	intracellular	2.44919e-21	0
biological_process	GO:0006725	cellular aromatic compound metabolic process	9.46041e-21	0
biological_process	GO:0009058	biosynthetic process	9.91485e-21	0
biological_process	GO:0046483	heterocycle metabolic process	2.3949e-20	0
biological_process	GO:0044271	cellular nitrogen compound biosynthetic process	4.02235e-20	0
biological_process	GO:1901576	organic substance biosynthetic process	4.40794e-20	0
biological_process	GO:0006139	nucleobase-containing compound metabolic process	7.30455e-20	0
biological_process	GO:0090304	nucleic acid metabolic process	7.73746e-20	0
biological_process	GO:0019222	regulation of metabolic process	4.28077e-19	0
biological_process	GO:0070887	cellular response to chemical stimulus	1.11184e-18	0
biological_process	GO:0044249	cellular biosynthetic process	4.2346e-18	0
molecular_function	GO:0003677	DNA binding	6.57075e-18	0
biological_process	GO:0010033	response to organic substance	2.89217e-17	0
biological_process	GO:0009059	macromolecule biosynthetic process	3.38715e-17	0
biological_process	GO:0071704	organic substance metabolic process	4.77508e-17	0
biological_process	GO:0034641	cellular nitrogen compound metabolic process	6.11644e-17	0
biological_process	GO:0060255	regulation of macromolecule metabolic process	1.19507e-16	0
biological_process	GO:0071310	cellular response to organic substance	2.50806e-16	0
biological_process	GO:0034645	cellular macromolecule biosynthetic process	3.51377e-16	0
biological_process	GO:0008152	metabolic process	3.93541e-16	0
biological_process	GO:0050794	regulation of cellular process	2.63011e-15	0
biological_process	GO:0048522	positive regulation of cellular process	1.21905e-14	0
biological_process	GO:1901700	response to oxygen-containing compound	1.43835e-14	0
biological_process	GO:0043170	macromolecule metabolic process	1.81999e-14	0
biological_process	GO:0048518	positive regulation of biological process	3.93647e-14	0
cellular_component	GO:0031974	membrane-enclosed lumen	1.04884e-13	0
cellular_component	GO:0043233	organelle lumen	1.04884e-13	0
cellular_component	GO:0070013	intracellular organelle lumen	1.04884e-13	0
biological_process	GO:0000122	negative regulation of transcription by RNA polymerase II	1.17846e-13	0
biological_process	GO:0002274	myeloid leukocyte activation	1.3824e-13	0
biological_process	GO:0001775	cell activation	1.87586e-13	0
biological_process	GO:0045321	leukocyte activation	3.53814e-13	0
biological_process	GO:0010468	regulation of gene expression	4.08169e-13	0
biological_process	GO:0002263	cell activation involved in immune response	7.81681e-13	0
biological_process	GO:0002366	leukocyte activation involved in immune response	1.04252e-12	0
molecular_function	GO:0003676	nucleic acid binding	1.85579e-12	0
biological_process	GO:0045892	negative regulation of transcription, DNA-templated	2.39672e-12	0
biological_process	GO:0031325	positive regulation of cellular metabolic process	2.78335e-12	0
biological_process	GO:1901701	cellular response to oxygen-containing compound	2.88194e-12	0
biological_process	GO:0009893	positive regulation of metabolic process	2.89795e-12	0
molecular_function	GO:0046872	metal ion binding	3.41001e-12	0
biological_process	GO:1903507	negative regulation of nucleic acid-templated transcription	9.72931e-12	0
biological_process	GO:0050789	regulation of biological process	1.02784e-11	0
biological_process	GO:1902679	negative regulation of RNA biosynthetic process	1.1376e-11	0
molecular_function	GO:0043169	cation binding	1.15286e-11	0
biological_process	GO:0031328	positive regulation of cellular biosynthetic process	1.16678e-11	0
biological_process	GO:0009891	positive regulation of biosynthetic process	1.47957e-11	0
molecular_function	GO:0097159	organic cyclic compound binding	1.51725e-11	0
biological_process	GO:0051173	positive regulation of nitrogen compound metabolic process	1.60427e-11	0
molecular_function	GO:1901363	heterocyclic compound binding	2.43959e-11	0
biological_process	GO:0065007	biological regulation	2.9239e-11	0
biological_process	GO:0010604	positive regulation of macromolecule metabolic process	3.07024e-11	0
biological_process	GO:0051253	negative regulation of RNA metabolic process	3.51894e-11	0
biological_process	GO:0010557	positive regulation of macromolecule biosynthetic process	4.41767e-11	0
biological_process	GO:0010467	gene expression	6.65618e-11	0
biological_process	GO:1903508	positive regulation of nucleic acid-templated transcription	8.36494e-11	0
biological_process	GO:1902680	positive regulation of RNA biosynthetic process	8.93239e-11	0
biological_process	GO:0002275	myeloid cell activation involved in immune response	8.95874e-11	0
molecular_function	GO:0044212	transcription regulatory region DNA binding	9.47336e-11	0
molecular_function	GO:0000977	RNA polymerase II regulatory region sequence-specific DNA binding	9.67103e-11	0
molecular_function	GO:0001012	RNA polymerase II regulatory region DNA binding	9.67103e-11	0
molecular_function	GO:0001067	regulatory region nucleic acid binding	1.04187e-10	0
molecular_function	GO:0000976	transcription regulatory region sequence-specific DNA binding	1.11175e-10	0
biological_process	GO:0046903	secretion	1.14469e-10	0
biological_process	GO:0051254	positive regulation of RNA metabolic process	1.64286e-10	0
biological_process	GO:0010628	positive regulation of gene expression	2.58038e-10	0
molecular_function	GO:0005488	binding	2.83965e-10	0
biological_process	GO:0048523	negative regulation of cellular process	2.90345e-10	0
biological_process	GO:0033993	response to lipid	3.06433e-10	0
biological_process	GO:0009605	response to external stimulus	3.11204e-10	0
biological_process	GO:0032940	secretion by cell	3.3668e-10	0
biological_process	GO:0009719	response to endogenous stimulus	4.30131e-10	0
biological_process	GO:0002444	myeloid leukocyte mediated immunity	4.70481e-10	0
biological_process	GO:0140352	export from cell	5.57283e-10	0
biological_process	GO:0042221	response to chemical	6.48675e-10	0
cellular_component	GO:0005654	nucleoplasm	6.67638e-10	0
cellular_component	GO:0030055	cell-substrate junction	6.90761e-10	0
biological_process	GO:0002376	immune system process	8.28557e-10	0
biological_process	GO:0006954	inflammatory response	8.84235e-10	0
biological_process	GO:0043299	leukocyte degranulation	1.16868e-09	0
biological_process	GO:0045934	negative regulation of nucleobase-containing compound metabolic process	1.26597e-09	0
cellular_component	GO:0005925	focal adhesion	1.45697e-09	0
biological_process	GO:0036230	granulocyte activation	1.57673e-09	0
biological_process	GO:0051172	negative regulation of nitrogen compound metabolic process	1.74659e-09	0
cellular_component	GO:0070062	extracellular exosome	2.15732e-09	0
biological_process	GO:0034097	response to cytokine	2.17598e-09	0
biological_process	GO:0002283	neutrophil activation involved in immune response	2.35281e-09	0
biological_process	GO:0071396	cellular response to lipid	2.61034e-09	0
molecular_function	GO:1990837	sequence-specific double-stranded DNA binding	2.67875e-09	0
biological_process	GO:0045935	positive regulation of nucleobase-containing compound metabolic process	2.77383e-09	0
biological_process	GO:0045893	positive regulation of transcription, DNA-templated	2.86291e-09	0
cellular_component	GO:1903561	extracellular vesicle	3.1051e-09	0
biological_process	GO:0042119	neutrophil activation	3.47793e-09	0
biological_process	GO:0043312	neutrophil degranulation	3.50145e-09	0
biological_process	GO:0023056	positive regulation of signaling	3.75507e-09	0
biological_process	GO:0002446	neutrophil mediated immunity	3.88563e-09	0
cellular_component	GO:0043230	extracellular organelle	3.99444e-09	0
biological_process	GO:0006950	response to stress	4.25413e-09	0
biological_process	GO:0031324	negative regulation of cellular metabolic process	4.62183e-09	0
biological_process	GO:0002252	immune effector process	4.95174e-09	0
biological_process	GO:0007166	cell surface receptor signaling pathway	5.05149e-09	0
biological_process	GO:0045944	positive regulation of transcription by RNA polymerase II	5.30601e-09	0
biological_process	GO:0045055	regulated exocytosis	5.37017e-09	0
molecular_function	GO:0043167	ion binding	5.5985e-09	0
biological_process	GO:0010647	positive regulation of cell communication	8.88858e-09	0
biological_process	GO:0045785	positive regulation of cell adhesion	9.33552e-09	0
cellular_component	GO:0031982	vesicle	1.12973e-08	0
biological_process	GO:0010243	response to organonitrogen compound	1.15634e-08	0
biological_process	GO:0006887	exocytosis	1.2325e-08	0
biological_process	GO:0032496	response to lipopolysaccharide	1.31393e-08	0
biological_process	GO:0002237	response to molecule of bacterial origin	1.40893e-08	0
molecular_function	GO:0005515	protein binding	1.45225e-08	0
biological_process	GO:0014070	response to organic cyclic compound	1.50011e-08	0
biological_process	GO:0009888	tissue development	1.50035e-08	0
biological_process	GO:0045595	regulation of cell differentiation	1.94167e-08	0
biological_process	GO:2000113	negative regulation of cellular macromolecule biosynthetic process	1.96227e-08	0
biological_process	GO:0009653	anatomical structure morphogenesis	2.29848e-08	0
biological_process	GO:0009725	response to hormone	2.64733e-08	0
biological_process	GO:0071345	cellular response to cytokine stimulus	3.04428e-08	0
biological_process	GO:0046165	alcohol biosynthetic process	3.11375e-08	0
biological_process	GO:0051240	positive regulation of multicellular organismal process	3.25594e-08	0
cellular_component	GO:0099503	secretory vesicle	3.48954e-08	0
cellular_component	GO:0034774	secretory granule lumen	3.63183e-08	0
molecular_function	GO:0043565	sequence-specific DNA binding	3.97366e-08	0
biological_process	GO:0071216	cellular response to biotic stimulus	5.25455e-08	0
biological_process	GO:1901698	response to nitrogen compound	5.39462e-08	0
cellular_component	GO:0060205	cytoplasmic vesicle lumen	6.05967e-08	0
cellular_component	GO:0110165	cellular anatomical entity	6.45892e-08	0
cellular_component	GO:0031410	cytoplasmic vesicle	6.53257e-08	0
cellular_component	GO:0030141	secretory granule	6.66911e-08	0
biological_process	GO:1901652	response to peptide	6.92336e-08	0
biological_process	GO:0002443	leukocyte mediated immunity	7.02707e-08	0
molecular_function	GO:0044877	protein-containing complex binding	7.35949e-08	0
cellular_component	GO:0097708	intracellular vesicle	7.46821e-08	0
cellular_component	GO:0031983	vesicle lumen	7.78848e-08	0
biological_process	GO:0006695	cholesterol biosynthetic process	8.81344e-08	0
biological_process	GO:0071495	cellular response to endogenous stimulus	9.23821e-08	0
biological_process	GO:0071407	cellular response to organic cyclic compound	9.4587e-08	0
biological_process	GO:0044283	small molecule biosynthetic process	9.88963e-08	0
biological_process	GO:0050810	regulation of steroid biosynthetic process	1.02277e-07	0
biological_process	GO:1902653	secondary alcohol biosynthetic process	1.19599e-07	0
molecular_function	GO:0050839	cell adhesion molecule binding	1.27399e-07	0
biological_process	GO:0071219	cellular response to molecule of bacterial origin	1.286e-07	0
biological_process	GO:0010558	negative regulation of macromolecule biosynthetic process	1.38733e-07	0
biological_process	GO:0051050	positive regulation of transport	1.52062e-07	0
biological_process	GO:0031327	negative regulation of cellular biosynthetic process	1.84513e-07	0
biological_process	GO:0009967	positive regulation of signal transduction	2.03446e-07	0
biological_process	GO:0009628	response to abiotic stimulus	2.03869e-07	0
cellular_component	GO:0031981	nuclear lumen	2.07979e-07	0
biological_process	GO:0048534	hematopoietic or lymphoid organ development	2.33536e-07	0
biological_process	GO:0050793	regulation of developmental process	2.50294e-07	0
biological_process	GO:0006952	defense response	2.52926e-07	0
biological_process	GO:0006955	immune response	2.58255e-07	0
biological_process	GO:0048583	regulation of response to stimulus	2.67929e-07	0
biological_process	GO:0009890	negative regulation of biosynthetic process	2.87132e-07	0
biological_process	GO:0048513	animal organ development	2.94485e-07	0
biological_process	GO:0007155	cell adhesion	3.14246e-07	0
biological_process	GO:0030154	cell differentiation	3.63574e-07	0
biological_process	GO:0048584	positive regulation of response to stimulus	3.67123e-07	0
biological_process	GO:0009636	response to toxic substance	3.71117e-07	0
biological_process	GO:0022610	biological adhesion	4.58927e-07	0
biological_process	GO:0023051	regulation of signaling	4.98522e-07	0
biological_process	GO:0016126	sterol biosynthetic process	4.99767e-07	0
biological_process	GO:0048869	cellular developmental process	5.4845e-07	0
biological_process	GO:0002521	leukocyte differentiation	5.61201e-07	0
biological_process	GO:0019221	cytokine-mediated signaling pathway	6.16559e-07	0
biological_process	GO:0010646	regulation of cell communication	6.4007e-07	0
biological_process	GO:0071222	cellular response to lipopolysaccharide	6.97459e-07	0
biological_process	GO:0030097	hemopoiesis	7.05618e-07	0
biological_process	GO:0002682	regulation of immune system process	7.88529e-07	0
biological_process	GO:0022409	positive regulation of cell-cell adhesion	8.02232e-07	0
biological_process	GO:0051239	regulation of multicellular organismal process	8.02758e-07	0
biological_process	GO:0010941	regulation of cell death	8.39136e-07	0
molecular_function	GO:0003690	double-stranded DNA binding	9.50622e-07	0
biological_process	GO:0050776	regulation of immune response	9.58961e-07	0
biological_process	GO:0006694	steroid biosynthetic process	1.10047e-06	0
biological_process	GO:1902533	positive regulation of intracellular signal transduction	1.23993e-06	0
biological_process	GO:0051707	response to other organism	1.24128e-06	0
molecular_function	GO:0051015	actin filament binding	1.34274e-06	0
biological_process	GO:0043434	response to peptide hormone	1.36452e-06	0
biological_process	GO:0043207	response to external biotic stimulus	1.37352e-06	0
biological_process	GO:0009607	response to biotic stimulus	1.39131e-06	0
biological_process	GO:0002684	positive regulation of immune system process	1.42525e-06	0
biological_process	GO:1901617	organic hydroxy compound biosynthetic process	1.47485e-06	0
biological_process	GO:0042981	regulation of apoptotic process	1.54644e-06	0
molecular_function	GO:0001228	DNA-binding transcription activator activity, RNA polymerase II-specific	1.58394e-06	0
biological_process	GO:0044419	interspecies interaction between organisms	1.68533e-06	0
molecular_function	GO:0001216	DNA-binding transcription activator activity	1.74326e-06	0
molecular_function	GO:0003712	transcription coregulator activity	1.87194e-06	0
biological_process	GO:1903039	positive regulation of leukocyte cell-cell adhesion	1.90384e-06	0
biological_process	GO:2001233	regulation of apoptotic signaling pathway	1.96097e-06	0
biological_process	GO:0002520	immune system development	2.08825e-06	0
cellular_component	GO:0012505	endomembrane system	2.26923e-06	0
biological_process	GO:0042108	positive regulation of cytokine biosynthetic process	2.42406e-06	0
biological_process	GO:0000165	MAPK cascade	2.4606e-06	0
biological_process	GO:0048856	anatomical structure development	2.48866e-06	0
biological_process	GO:0043067	regulation of programmed cell death	2.67272e-06	0
biological_process	GO:0080134	regulation of response to stress	2.67432e-06	0
biological_process	GO:0042110	T cell activation	2.74111e-06	0
biological_process	GO:0048585	negative regulation of response to stimulus	2.82109e-06	0
biological_process	GO:0019216	regulation of lipid metabolic process	2.88649e-06	0
biological_process	GO:0008202	steroid metabolic process	3.25533e-06	0
biological_process	GO:0032870	cellular response to hormone stimulus	3.29856e-06	0
biological_process	GO:0051094	positive regulation of developmental process	3.40531e-06	0
biological_process	GO:0097529	myeloid leukocyte migration	3.46522e-06	0
biological_process	GO:0051049	regulation of transport	3.48687e-06	0
biological_process	GO:0008203	cholesterol metabolic process	3.50183e-06	0
molecular_function	GO:0000978	RNA polymerase II cis-regulatory region sequence-specific DNA binding	4.05706e-06	0
molecular_function	GO:0008134	transcription factor binding	4.77016e-06	0
molecular_function	GO:0000987	cis-regulatory region sequence-specific DNA binding	9.78926e-06	0
molecular_function	GO:0035326	cis-regulatory region binding	9.78926e-06	0
biological_process	GO:0046890	regulation of lipid biosynthetic process	3.60446e-06	0.01
biological_process	GO:0042325	regulation of phosphorylation	3.83464e-06	0.01
biological_process	GO:0009987	cellular process	4.01373e-06	0.01
biological_process	GO:0065009	regulation of molecular function	4.12827e-06	0.01
biological_process	GO:0023014	signal transduction by protein phosphorylation	4.76107e-06	0.01
biological_process	GO:0033554	cellular response to stress	4.89889e-06	0.01
cellular_component	GO:0005788	endoplasmic reticulum lumen	4.37906e-06	0.02
cellular_component	GO:0070161	anchoring junction	4.70865e-06	0.02
biological_process	GO:0001819	positive regulation of cytokine production	5.03162e-06	0.02
biological_process	GO:1901615	organic hydroxy compound metabolic process	5.13837e-06	0.02
biological_process	GO:0030155	regulation of cell adhesion	5.19275e-06	0.02
biological_process	GO:0060548	negative regulation of cell death	5.22905e-06	0.02
biological_process	GO:0016192	vesicle-mediated transport	5.37339e-06	0.02
biological_process	GO:0045672	positive regulation of osteoclast differentiation	5.53181e-06	0.02
biological_process	GO:0019218	regulation of steroid metabolic process	5.68794e-06	0.02
biological_process	GO:0009966	regulation of signal transduction	5.69605e-06	0.02
biological_process	GO:0007159	leukocyte cell-cell adhesion	6.10224e-06	0.02
biological_process	GO:0035556	intracellular signal transduction	6.10439e-06	0.02
biological_process	GO:1903037	regulation of leukocyte cell-cell adhesion	6.13997e-06	0.02
biological_process	GO:0010638	positive regulation of organelle organization	6.40853e-06	0.02
biological_process	GO:0001816	cytokine production	6.92573e-06	0.02
biological_process	GO:0019220	regulation of phosphate metabolic process	7.70548e-06	0.02
biological_process	GO:2001235	positive regulation of apoptotic signaling pathway	7.83224e-06	0.02
biological_process	GO:0001659	temperature homeostasis	7.91192e-06	0.02
biological_process	GO:1902652	secondary alcohol metabolic process	7.95242e-06	0.02
biological_process	GO:0001817	regulation of cytokine production	7.96184e-06	0.02
cellular_component	GO:0005604	basement membrane	8.23326e-06	0.02
biological_process	GO:0051174	regulation of phosphorus metabolic process	8.38132e-06	0.02
biological_process	GO:0062012	regulation of small molecule metabolic process	8.81398e-06	0.02
biological_process	GO:0048871	multicellular organismal homeostasis	9.16213e-06	0.02
biological_process	GO:0022407	regulation of cell-cell adhesion	9.1874e-06	0.02
biological_process	GO:0000902	cell morphogenesis	9.68275e-06	0.02
biological_process	GO:0032502	developmental process	1.05381e-05	0.02
biological_process	GO:0001932	regulation of protein phosphorylation	1.0583e-05	0.02
biological_process	GO:0048646	anatomical structure formation involved in morphogenesis	1.15585e-05	0.02
cellular_component	GO:0005615	extracellular space	1.31577e-05	0.02
cellular_component	GO:0005766	primary lysosome	2.69088e-05	0.02
cellular_component	GO:0042582	azurophil granule	2.69088e-05	0.02
molecular_function	GO:0042802	identical protein binding	3.62414e-05	0.02
biological_process	GO:0043066	negative regulation of apoptotic process	1.33709e-05	0.03
biological_process	GO:0007275	multicellular organism development	1.38736e-05	0.03
biological_process	GO:0048519	negative regulation of biological process	1.49946e-05	0.04
biological_process	GO:0016310	phosphorylation	1.56479e-05	0.04
molecular_function	GO:0045296	cadherin binding	5.81854e-05	0.04
biological_process	GO:0031399	regulation of protein modification process	1.57953e-05	0.05
cellular_component	GO:0000323	lytic vacuole	5.5019e-05	0.05
molecular_function	GO:0051427	hormone receptor binding	7.84013e-05	0.05
biological_process	GO:0046677	response to antibiotic	1.67924e-05	0.06
biological_process	GO:0016125	sterol metabolic process	1.67993e-05	0.06
biological_process	GO:1990845	adaptive thermogenesis	1.70605e-05	0.06
biological_process	GO:0032879	regulation of localization	1.7747e-05	0.06
biological_process	GO:0032388	positive regulation of intracellular transport	1.78291e-05	0.06
biological_process	GO:0090087	regulation of peptide transport	1.80814e-05	0.06
cellular_component	GO:0101002	ficolin-1-rich granule	6.52396e-05	0.06
cellular_component	GO:1904813	ficolin-1-rich granule lumen	6.52396e-05	0.06
cellular_component	GO:0005773	vacuole	6.79159e-05	0.06
cellular_component	GO:0005764	lysosome	8.18316e-05	0.07
cellular_component	GO:0035580	specific granule lumen	8.50499e-05	0.07
biological_process	GO:0048468	cell development	1.90438e-05	0.08
biological_process	GO:0048511	rhythmic process	1.93361e-05	0.08
biological_process	GO:0032635	interleukin-6 production	1.9666e-05	0.08
biological_process	GO:0097190	apoptotic signaling pathway	2.01001e-05	0.08
biological_process	GO:0006468	protein phosphorylation	2.0515e-05	0.08
biological_process	GO:0006066	alcohol metabolic process	2.09258e-05	0.09
biological_process	GO:0070201	regulation of establishment of protein localization	2.09657e-05	0.09
biological_process	GO:0023057	negative regulation of signaling	2.13719e-05	0.09
cellular_component	GO:0062023	collagen-containing extracellular matrix	9.95245e-05	0.09
biological_process	GO:0051246	regulation of protein metabolic process	2.18168e-05	0.1
biological_process	GO:0048731	system development	2.35227e-05	0.1
cellular_component	GO:0005775	vacuolar lumen	0.000111883	0.1
biological_process	GO:0045597	positive regulation of cell differentiation	2.49712e-05	0.11
biological_process	GO:0010648	negative regulation of cell communication	2.52815e-05	0.11
biological_process	GO:0043069	negative regulation of programmed cell death	2.70073e-05	0.11
biological_process	GO:0051223	regulation of protein transport	2.77607e-05	0.11
biological_process	GO:1902531	regulation of intracellular signal transduction	2.83988e-05	0.11
biological_process	GO:0022603	regulation of anatomical structure morphogenesis	3.03297e-05	0.11
biological_process	GO:0046649	lymphocyte activation	3.14198e-05	0.11
biological_process	GO:0030198	extracellular matrix organization	3.24038e-05	0.11
molecular_function	GO:0140297	DNA-binding transcription factor binding	0.000104348	0.11
biological_process	GO:0070997	neuron death	3.40878e-05	0.12
biological_process	GO:0043062	extracellular structure organization	3.54096e-05	0.12
biological_process	GO:0032101	regulation of response to external stimulus	3.71884e-05	0.12
biological_process	GO:0008219	cell death	3.8454e-05	0.13
biological_process	GO:0007267	cell-cell signaling	3.85264e-05	0.13
biological_process	GO:1903706	regulation of hemopoiesis	3.87836e-05	0.13
biological_process	GO:0010562	positive regulation of phosphorus metabolic process	4.0722e-05	0.13
biological_process	GO:0045937	positive regulation of phosphate metabolic process	4.0722e-05	0.13
biological_process	GO:0007249	I-kappaB kinase/NF-kappaB signaling	4.08019e-05	0.13
biological_process	GO:0010035	response to inorganic substance	4.19984e-05	0.13
biological_process	GO:0032103	positive regulation of response to external stimulus	4.25008e-05	0.13
biological_process	GO:0032880	regulation of protein localization	4.25253e-05	0.13
biological_process	GO:0051247	positive regulation of protein metabolic process	4.32514e-05	0.14
biological_process	GO:0043408	regulation of MAPK cascade	4.33529e-05	0.14
molecular_function	GO:0019899	enzyme binding	0.000133827	0.14
biological_process	GO:0006464	cellular protein modification process	4.51996e-05	0.15
biological_process	GO:0036211	protein modification process	4.51996e-05	0.15
biological_process	GO:2001236	regulation of extrinsic apoptotic signaling pathway	4.80572e-05	0.15
cellular_component	GO:0033256	I-kappaB/NF-kappaB complex	0.000147709	0.15
cellular_component	GO:0035976	transcription factor AP-1 complex	0.000147709	0.15
molecular_function	GO:0001217	DNA-binding transcription repressor activity	0.000154645	0.15
molecular_function	GO:0001227	DNA-binding transcription repressor activity, RNA polymerase II-specific	0.000154645	0.15
biological_process	GO:0006796	phosphate-containing compound metabolic process	4.96566e-05	0.17
biological_process	GO:0051130	positive regulation of cellular component organization	5.03974e-05	0.17
cellular_component	GO:0070820	tertiary granule	0.000206968	0.18
biological_process	GO:0071496	cellular response to external stimulus	5.21976e-05	0.19
biological_process	GO:0006793	phosphorus metabolic process	5.2907e-05	0.19
molecular_function	GO:0061629	RNA polymerase II-specific DNA-binding transcription factor binding	0.000189138	0.19
biological_process	GO:0009617	response to bacterium	5.93022e-05	0.2
biological_process	GO:0006915	apoptotic process	6.03188e-05	0.2
biological_process	GO:0097237	cellular response to toxic substance	6.53562e-05	0.2
biological_process	GO:0090316	positive regulation of intracellular protein transport	6.58931e-05	0.21
molecular_function	GO:0003714	transcription corepressor activity	0.000200355	0.21
cellular_component	GO:0030054	cell junction	0.000244392	0.21
cellular_component	GO:0042641	actomyosin	0.000279496	0.21
molecular_function	GO:0005178	integrin binding	0.000236471	0.22
biological_process	GO:1902930	regulation of alcohol biosynthetic process	6.90714e-05	0.23
biological_process	GO:0032386	regulation of intracellular transport	7.02231e-05	0.23
biological_process	GO:0050870	positive regulation of T cell activation	7.03595e-05	0.23
biological_process	GO:0038061	NIK/NF-kappaB signaling	7.18195e-05	0.23
biological_process	GO:0006629	lipid metabolic process	7.18791e-05	0.23
biological_process	GO:0032675	regulation of interleukin-6 production	7.47609e-05	0.23
biological_process	GO:0062197	cellular response to chemical stress	7.51746e-05	0.23
biological_process	GO:0043412	macromolecule modification	7.56173e-05	0.23
biological_process	GO:0002294	CD4-positive, alpha-beta T cell differentiation involved in immune response	7.62117e-05	0.23
biological_process	GO:0042493	response to drug	7.72739e-05	0.23
biological_process	GO:0031401	positive regulation of protein modification process	7.78726e-05	0.23
biological_process	GO:0045540	regulation of cholesterol biosynthetic process	8.01025e-05	0.23
biological_process	GO:0106118	regulation of sterol biosynthetic process	8.01025e-05	0.23
cellular_component	GO:0035578	azurophil granule lumen	0.000289027	0.23
biological_process	GO:0042327	positive regulation of phosphorylation	8.23055e-05	0.24
cellular_component	GO:0030863	cortical cytoskeleton	0.000313464	0.24
cellular_component	GO:0032432	actin filament bundle	0.00038955	0.25
cellular_component	GO:0015629	actin cytoskeleton	0.000457327	0.25
biological_process	GO:0032268	regulation of cellular protein metabolic process	8.40665e-05	0.27
biological_process	GO:1903829	positive regulation of cellular protein localization	8.62299e-05	0.27
biological_process	GO:0002573	myeloid leukocyte differentiation	8.8933e-05	0.27
biological_process	GO:1901699	cellular response to nitrogen compound	9.01841e-05	0.27
biological_process	GO:1904035	regulation of epithelial cell apoptotic process	9.1228e-05	0.27
biological_process	GO:0008283	cell population proliferation	9.19219e-05	0.27
biological_process	GO:0000904	cell morphogenesis involved in differentiation	9.39279e-05	0.27
biological_process	GO:2000026	regulation of multicellular organismal development	9.48532e-05	0.27
biological_process	GO:0002819	regulation of adaptive immune response	9.52667e-05	0.27
biological_process	GO:0030099	myeloid cell differentiation	9.65234e-05	0.27
biological_process	GO:0002287	alpha-beta T cell activation involved in immune response	9.67628e-05	0.27
biological_process	GO:0002293	alpha-beta T cell differentiation involved in immune response	9.67628e-05	0.27
biological_process	GO:2001244	positive regulation of intrinsic apoptotic signaling pathway	9.67628e-05	0.27
biological_process	GO:0032615	interleukin-12 production	0.000101663	0.3
cellular_component	GO:0098589	membrane region	0.000601066	0.31
biological_process	GO:0033603	positive regulation of dopamine secretion	0.000101673	0.32
biological_process	GO:0018193	peptidyl-amino acid modification	0.000103353	0.32
biological_process	GO:0006984	ER-nucleus signaling pathway	0.000104517	0.32
cellular_component	GO:0042581	specific granule	0.000607153	0.32
biological_process	GO:0008228	opsonization	0.000112951	0.33
biological_process	GO:0051402	neuron apoptotic process	0.000113479	0.33
biological_process	GO:0098609	cell-cell adhesion	0.000115158	0.33
biological_process	GO:0042116	macrophage activation	0.000115745	0.33
biological_process	GO:0016570	histone modification	0.000115952	0.33
biological_process	GO:0051222	positive regulation of protein transport	0.000118439	0.33
biological_process	GO:0106106	cold-induced thermogenesis	0.000118969	0.33
biological_process	GO:0120161	regulation of cold-induced thermogenesis	0.000118969	0.33
biological_process	GO:0006935	chemotaxis	0.000120162	0.33
biological_process	GO:0050863	regulation of T cell activation	0.000120472	0.33
biological_process	GO:0044092	negative regulation of molecular function	0.000124529	0.33
biological_process	GO:1904951	positive regulation of establishment of protein localization	0.00013412	0.36
biological_process	GO:1901653	cellular response to peptide	0.000135182	0.36
biological_process	GO:0042330	taxis	0.000135589	0.37
biological_process	GO:1902107	positive regulation of leukocyte differentiation	0.00013659	0.37
biological_process	GO:0012501	programmed cell death	0.000138696	0.38
biological_process	GO:0007623	circadian rhythm	0.000139989	0.38
biological_process	GO:0002292	T cell differentiation involved in immune response	0.000140448	0.38
cellular_component	GO:0045121	membrane raft	0.000674839	0.38
biological_process	GO:0009968	negative regulation of signal transduction	0.000145567	0.39
biological_process	GO:0042035	regulation of cytokine biosynthetic process	0.000145937	0.39
biological_process	GO:0022008	neurogenesis	0.000149205	0.39
biological_process	GO:0040011	locomotion	0.000152526	0.39
biological_process	GO:0090181	regulation of cholesterol metabolic process	0.000152934	0.4
biological_process	GO:0032270	positive regulation of cellular protein metabolic process	0.000154452	0.4
molecular_function	GO:0031625	ubiquitin protein ligase binding	0.000599741	0.4
molecular_function	GO:0035257	nuclear hormone receptor binding	0.000635086	0.4
biological_process	GO:0002685	regulation of leukocyte migration	0.000157401	0.41
cellular_component	GO:0098857	membrane microdomain	0.000728478	0.41
cellular_component	GO:0001725	stress fiber	0.00075904	0.41
cellular_component	GO:0097517	contractile actin filament bundle	0.00075904	0.41
biological_process	GO:0042093	T-helper cell differentiation	0.000164297	0.43
cellular_component	GO:0016604	nuclear body	0.000914512	0.46
molecular_function	GO:0017166	vinculin binding	0.000688902	0.47
cellular_component	GO:0030667	secretory granule membrane	0.00097228	0.47
biological_process	GO:0065008	regulation of biological quality	0.000165817	0.49
biological_process	GO:0050727	regulation of inflammatory response	0.000172683	0.49
biological_process	GO:0016569	covalent chromatin modification	0.000173213	0.49
biological_process	GO:1905517	macrophage migration	0.00017352	0.49
biological_process	GO:0033157	regulation of intracellular protein transport	0.000175748	0.5
biological_process	GO:0030595	leukocyte chemotaxis	0.000189473	0.52
biological_process	GO:1900449	regulation of glutamate receptor signaling pathway	0.000190471	0.52
biological_process	GO:1903708	positive regulation of hemopoiesis	0.000197554	0.52
biological_process	GO:1901214	regulation of neuron death	0.000202093	0.52
biological_process	GO:0071417	cellular response to organonitrogen compound	0.000205028	0.52
biological_process	GO:1902105	regulation of leukocyte differentiation	0.00020644	0.52
biological_process	GO:0022604	regulation of cell morphogenesis	0.000209401	0.53
biological_process	GO:0031347	regulation of defense response	0.000218405	0.53
biological_process	GO:0036293	response to decreased oxygen levels	0.000219594	0.53
cellular_component	GO:0001726	ruffle	0.00106982	0.53
cellular_component	GO:0005938	cell cortex	0.00119275	0.53
cellular_component	GO:0031012	extracellular matrix	0.0011947	0.53
cellular_component	GO:0098805	whole membrane	0.00128638	0.53
biological_process	GO:0032530	regulation of microvillus organization	0.000220719	0.54
biological_process	GO:0032655	regulation of interleukin-12 production	0.000220883	0.54
biological_process	GO:0031639	plasminogen activation	0.000225508	0.56
biological_process	GO:0042089	cytokine biosynthetic process	0.000227507	0.56
molecular_function	GO:0004029	aldehyde dehydrogenase (NAD+) activity	0.000803033	0.56
molecular_function	GO:0044548	S100 protein binding	0.000803033	0.56
biological_process	GO:0010942	positive regulation of cell death	0.000229672	0.57
biological_process	GO:0030335	positive regulation of cell migration	0.000232232	0.57
biological_process	GO:0019882	antigen processing and presentation	0.000232852	0.57
biological_process	GO:0051495	positive regulation of cytoskeleton organization	0.000232852	0.57
biological_process	GO:0050790	regulation of catalytic activity	0.000248049	0.59
biological_process	GO:0042107	cytokine metabolic process	0.000262568	0.61
biological_process	GO:0051101	regulation of DNA binding	0.000262568	0.61
biological_process	GO:0040017	positive regulation of locomotion	0.000264752	0.61
biological_process	GO:0071453	cellular response to oxygen levels	0.000265401	0.61
biological_process	GO:0070482	response to oxygen levels	0.000269785	0.61
biological_process	GO:0097435	supramolecular fiber organization	0.000273309	0.61
biological_process	GO:0001934	positive regulation of protein phosphorylation	0.000279096	0.61
biological_process	GO:0110096	cellular response to aldehyde	0.000296186	0.61
biological_process	GO:0002931	response to ischemia	0.000296425	0.61
biological_process	GO:0042063	gliogenesis	0.000303101	0.61
biological_process	GO:0006734	NADH metabolic process	0.000310292	0.62
molecular_function	GO:0019834	phospholipase A2 inhibitor activity	0.000840173	0.62
molecular_function	GO:0044389	ubiquitin-like protein ligase binding	0.000847653	0.62
biological_process	GO:0046632	alpha-beta T cell differentiation	0.000315847	0.63
biological_process	GO:0098542	defense response to other organism	0.000318786	0.63
biological_process	GO:0042127	regulation of cell population proliferation	0.000319102	0.63
molecular_function	GO:0019900	kinase binding	0.000973659	0.64
molecular_function	GO:0003779	actin binding	0.00106523	0.64
molecular_function	GO:0000979	RNA polymerase II core promoter sequence-specific DNA binding	0.00118201	0.65
molecular_function	GO:0004030	aldehyde dehydrogenase [NAD(P)+] activity	0.00128439	0.66
molecular_function	GO:0001046	core promoter sequence-specific DNA binding	0.00142951	0.66
molecular_function	GO:0001047	core promoter binding	0.00142951	0.66
biological_process	GO:0007399	nervous system development	0.000336544	0.69
biological_process	GO:0002822	regulation of adaptive immune response based on somatic recombination of immune receptors built from immunoglobulin superfamily domains	0.000356151	0.69
molecular_function	GO:0016620	oxidoreductase activity, acting on the aldehyde or oxo group of donors, NAD or NADP as acceptor	0.00154415	0.69
biological_process	GO:1902905	positive regulation of supramolecular fiber organization	0.000375971	0.7
biological_process	GO:0048305	immunoglobulin secretion	0.000382008	0.7
biological_process	GO:0035295	tube development	0.000385036	0.71
biological_process	GO:0043065	positive regulation of apoptotic process	0.00039174	0.71
biological_process	GO:2001242	regulation of intrinsic apoptotic signaling pathway	0.00039192	0.71
biological_process	GO:0050878	regulation of body fluid levels	0.000396028	0.72
cellular_component	GO:0016607	nuclear speck	0.00193069	0.72
biological_process	GO:1902043	positive regulation of extrinsic apoptotic signaling pathway via death domain receptors	0.000398215	0.74
biological_process	GO:0050896	response to stimulus	0.000399116	0.74
biological_process	GO:2000310	regulation of NMDA receptor activity	0.00040373	0.74
biological_process	GO:0002224	toll-like receptor signaling pathway	0.000403903	0.74
biological_process	GO:0055114	oxidation-reduction process	0.000408408	0.74
biological_process	GO:2000147	positive regulation of cell motility	0.00040878	0.74
biological_process	GO:0010811	positive regulation of cell-substrate adhesion	0.000409689	0.74
biological_process	GO:0030968	endoplasmic reticulum unfolded protein response	0.000409689	0.74
biological_process	GO:0009991	response to extracellular stimulus	0.000409692	0.74
biological_process	GO:1900221	regulation of amyloid-beta clearance	0.000414298	0.74
biological_process	GO:0051716	cellular response to stimulus	0.000415412	0.74
biological_process	GO:0034620	cellular response to unfolded protein	0.000421903	0.74
biological_process	GO:0048699	generation of neurons	0.000426474	0.74
biological_process	GO:0046364	monosaccharide biosynthetic process	0.000427232	0.74
biological_process	GO:0019752	carboxylic acid metabolic process	0.000435237	0.74
biological_process	GO:0071347	cellular response to interleukin-1	0.000437708	0.74
biological_process	GO:0051649	establishment of localization in cell	0.00043813	0.74
biological_process	GO:0001655	urogenital system development	0.000460241	0.74
biological_process	GO:0043367	CD4-positive, alpha-beta T cell differentiation	0.000461357	0.74
biological_process	GO:1901564	organonitrogen compound metabolic process	0.000462975	0.74
biological_process	GO:0034599	cellular response to oxidative stress	0.000464671	0.74
cellular_component	GO:0019898	extrinsic component of membrane	0.00229244	0.74
biological_process	GO:0043436	oxoacid metabolic process	0.00048973	0.76
biological_process	GO:0016477	cell migration	0.000490409	0.76
biological_process	GO:0031668	cellular response to extracellular stimulus	0.000496163	0.76
biological_process	GO:0050778	positive regulation of immune response	0.000498559	0.76
biological_process	GO:2001237	negative regulation of extrinsic apoptotic signaling pathway	0.000500479	0.76
biological_process	GO:0097193	intrinsic apoptotic signaling pathway	0.000503588	0.76
biological_process	GO:0044267	cellular protein metabolic process	0.000505008	0.76
biological_process	GO:0070555	response to interleukin-1	0.000511009	0.76
biological_process	GO:0051592	response to calcium ion	0.000516688	0.76
biological_process	GO:0035967	cellular response to topologically incorrect protein	0.000522759	0.76
biological_process	GO:0097028	dendritic cell differentiation	0.000529675	0.76
biological_process	GO:0071621	granulocyte chemotaxis	0.000538499	0.76
cellular_component	GO:0098839	postsynaptic density membrane	0.00245149	0.76
cellular_component	GO:0009986	cell surface	0.00246386	0.76
biological_process	GO:0002285	lymphocyte activation involved in immune response	0.000544524	0.77
biological_process	GO:0050806	positive regulation of synaptic transmission	0.00055263	0.77
biological_process	GO:0009790	embryo development	0.000553853	0.77
biological_process	GO:0018205	peptidyl-lysine modification	0.000562198	0.77
cellular_component	GO:0030135	coated vesicle	0.00252724	0.77
biological_process	GO:1901215	negative regulation of neuron death	0.000564762	0.79
biological_process	GO:1904019	epithelial cell apoptotic process	0.00056932	0.79
biological_process	GO:0048545	response to steroid hormone	0.000579028	0.79
biological_process	GO:0006082	organic acid metabolic process	0.000581298	0.79
biological_process	GO:0001892	embryonic placenta development	0.000584237	0.79
biological_process	GO:0061061	muscle structure development	0.000587385	0.79
cellular_component	GO:0030136	clathrin-coated vesicle	0.00255494	0.79
cellular_component	GO:0043034	costamere	0.00298451	0.79
cellular_component	GO:0099634	postsynaptic specialization membrane	0.00303084	0.79
cellular_component	GO:0005783	endoplasmic reticulum	0.00311814	0.79
biological_process	GO:0043068	positive regulation of programmed cell death	0.000600707	0.81
biological_process	GO:0048002	antigen processing and presentation of peptide antigen	0.000629658	0.81
biological_process	GO:0030036	actin cytoskeleton organization	0.000638086	0.81
biological_process	GO:0060716	labyrinthine layer blood vessel development	0.00064474	0.81
biological_process	GO:0043410	positive regulation of MAPK cascade	0.000645232	0.81
biological_process	GO:0034976	response to endoplasmic reticulum stress	0.000645462	0.81
biological_process	GO:0001763	morphogenesis of a branching structure	0.000651053	0.81
biological_process	GO:0045444	fat cell differentiation	0.000651693	0.81
biological_process	GO:0070527	platelet aggregation	0.000663329	0.81
biological_process	GO:0007167	enzyme linked receptor protein signaling pathway	0.000671538	0.81
biological_process	GO:0043122	regulation of I-kappaB kinase/NF-kappaB signaling	0.00067294	0.81
biological_process	GO:0042088	T-helper 1 type immune response	0.000681241	0.82
biological_process	GO:0060612	adipose tissue development	0.000681241	0.82
biological_process	GO:0007215	glutamate receptor signaling pathway	0.00068174	0.82
biological_process	GO:0034446	substrate adhesion-dependent cell spreading	0.00068174	0.82
biological_process	GO:0001933	negative regulation of protein phosphorylation	0.000687522	0.82
biological_process	GO:0051641	cellular localization	0.000690005	0.82
biological_process	GO:0070848	response to growth factor	0.000690845	0.82
biological_process	GO:0036294	cellular response to decreased oxygen levels	0.000702706	0.82
biological_process	GO:0071363	cellular response to growth factor stimulus	0.000708671	0.82
biological_process	GO:0051187	cofactor catabolic process	0.000718199	0.82
biological_process	GO:0002221	pattern recognition receptor signaling pathway	0.000720207	0.82
biological_process	GO:0046631	alpha-beta T cell activation	0.000728023	0.82
biological_process	GO:0002763	positive regulation of myeloid leukocyte differentiation	0.000735851	0.82
biological_process	GO:0032663	regulation of interleukin-2 production	0.000735851	0.82
biological_process	GO:0043392	negative regulation of DNA binding	0.000735851	0.82
molecular_function	GO:0001848	complement binding	0.00170159	0.82
molecular_function	GO:0046332	SMAD binding	0.00180268	0.82
cellular_component	GO:0005737	cytoplasm	0.00338702	0.82
cellular_component	GO:0005576	extracellular region	0.00345992	0.85
biological_process	GO:0001661	conditioned taste aversion	0.000751205	0.86
biological_process	GO:0071332	cellular response to fructose stimulus	0.000751205	0.86
biological_process	GO:2001137	positive regulation of endocytic recycling	0.000751205	0.86
biological_process	GO:0006107	oxaloacetate metabolic process	0.000779067	0.87
biological_process	GO:0009750	response to fructose	0.000779067	0.87
biological_process	GO:0036480	neuron intrinsic apoptotic signaling pathway in response to oxidative stress	0.000779067	0.87
biological_process	GO:1903376	regulation of oxidative stress-induced neuron intrinsic apoptotic signaling pathway	0.000779067	0.87
biological_process	GO:0007631	feeding behavior	0.000789632	0.87
biological_process	GO:0097711	ciliary basal body-plasma membrane docking	0.000800416	0.87
biological_process	GO:2001238	positive regulation of extrinsic apoptotic signaling pathway	0.000805883	0.87
biological_process	GO:0036315	cellular response to sterol	0.000813291	0.87
biological_process	GO:0001666	response to hypoxia	0.000814246	0.87
biological_process	GO:0009611	response to wounding	0.000844451	0.87
biological_process	GO:0006928	movement of cell or subcellular component	0.000865121	0.87
biological_process	GO:0031667	response to nutrient levels	0.000869395	0.88
biological_process	GO:0050900	leukocyte migration	0.000869395	0.88
biological_process	GO:0030217	T cell differentiation	0.000880832	0.88
biological_process	GO:0030029	actin filament-based process	0.000882251	0.88
biological_process	GO:0030098	lymphocyte differentiation	0.000886742	0.88
biological_process	GO:0050890	cognition	0.000889236	0.88
biological_process	GO:0019538	protein metabolic process	0.000890841	0.88
biological_process	GO:0042219	cellular modified amino acid catabolic process	0.000902827	0.88
biological_process	GO:0072538	T-helper 17 type immune response	0.000902827	0.88
biological_process	GO:0002009	morphogenesis of an epithelium	0.000908562	0.88
biological_process	GO:0006475	internal protein amino acid acetylation	0.000914183	0.88
biological_process	GO:0032755	positive regulation of interleukin-6 production	0.000929066	0.88
biological_process	GO:0035239	tube morphogenesis	0.000933786	0.88
biological_process	GO:0045936	negative regulation of phosphate metabolic process	0.000959693	0.88
biological_process	GO:0044281	small molecule metabolic process	0.000961183	0.88
biological_process	GO:0071397	cellular response to cholesterol	0.00096833	0.88
biological_process	GO:0071236	cellular response to antibiotic	0.000984671	0.88
molecular_function	GO:0001786	phosphatidylserine binding	0.00217726	0.88
biological_process	GO:0070741	response to interleukin-6	0.001004	0.89
biological_process	GO:0048870	cell motility	0.00100977	0.89
biological_process	GO:0051674	localization of cell	0.00100977	0.89
biological_process	GO:0010563	negative regulation of phosphorus metabolic process	0.00101331	0.89
biological_process	GO:0051128	regulation of cellular component organization	0.00101407	0.89
biological_process	GO:0046394	carboxylic acid biosynthetic process	0.00102212	0.89
biological_process	GO:0031349	positive regulation of defense response	0.00102465	0.89
biological_process	GO:0045088	regulation of innate immune response	0.00103167	0.89
biological_process	GO:0097530	granulocyte migration	0.00104267	0.89
biological_process	GO:0002863	positive regulation of inflammatory response to antigenic stimulus	0.00106501	0.89
biological_process	GO:0051272	positive regulation of cellular component movement	0.00106959	0.89
biological_process	GO:0051591	response to cAMP	0.00107516	0.89
biological_process	GO:0120162	positive regulation of cold-induced thermogenesis	0.00107516	0.89
biological_process	GO:0010817	regulation of hormone levels	0.00107542	0.89
biological_process	GO:0032695	negative regulation of interleukin-12 production	0.00108085	0.9
biological_process	GO:0016053	organic acid biosynthetic process	0.00109646	0.9
biological_process	GO:0019319	hexose biosynthetic process	0.0010997	0.9
biological_process	GO:0048729	tissue morphogenesis	0.00115674	0.9
biological_process	GO:0002478	antigen processing and presentation of exogenous peptide antigen	0.00117133	0.9
biological_process	GO:0050852	T cell receptor signaling pathway	0.00117242	0.9
molecular_function	GO:0005544	calcium-dependent phospholipid binding	0.0024383	0.9
biological_process	GO:0042092	type 2 immune response	0.00121865	0.91
biological_process	GO:0051403	stress-activated MAPK cascade	0.0012302	0.91
biological_process	GO:0042060	wound healing	0.00123259	0.91
biological_process	GO:2001234	negative regulation of apoptotic signaling pathway	0.00123261	0.91
biological_process	GO:0030334	regulation of cell migration	0.00123352	0.91
biological_process	GO:0031400	negative regulation of protein modification process	0.00123506	0.91
biological_process	GO:1903827	regulation of cellular protein localization	0.00123869	0.91
biological_process	GO:0031669	cellular response to nutrient levels	0.00124024	0.91
cellular_component	GO:0017053	transcriptional repressor complex	0.00415215	0.91
biological_process	GO:0035914	skeletal muscle cell differentiation	0.00124307	0.92
biological_process	GO:0048608	reproductive structure development	0.0012513	0.92
biological_process	GO:0042326	negative regulation of phosphorylation	0.00125244	0.92
biological_process	GO:0051338	regulation of transferase activity	0.00125858	0.92
biological_process	GO:0060429	epithelium development	0.00127111	0.92
molecular_function	GO:0001221	transcription cofactor binding	0.00296894	0.92
molecular_function	GO:0016903	oxidoreductase activity, acting on the aldehyde or oxo group of donors	0.00296894	0.92
molecular_function	GO:0005200	structural constituent of cytoskeleton	0.00305752	0.92
biological_process	GO:1901222	regulation of NIK/NF-kappaB signaling	0.00127676	0.93
biological_process	GO:0016573	histone acetylation	0.00129312	0.93
biological_process	GO:0051098	regulation of binding	0.00130104	0.93
biological_process	GO:0051046	regulation of secretion	0.00130183	0.93
biological_process	GO:0043523	regulation of neuron apoptotic process	0.00130739	0.93
biological_process	GO:0040012	regulation of locomotion	0.00132728	0.93
biological_process	GO:0051090	regulation of DNA-binding transcription factor activity	0.00133156	0.93
biological_process	GO:0060627	regulation of vesicle-mediated transport	0.0013446	0.93
biological_process	GO:0002437	inflammatory response to antigenic stimulus	0.00137023	0.93
biological_process	GO:0014075	response to amine	0.00137023	0.93
biological_process	GO:0060711	labyrinthine layer development	0.00137023	0.93
biological_process	GO:0002821	positive regulation of adaptive immune response	0.0013823	0.93
biological_process	GO:0036499	PERK-mediated unfolded protein response	0.00140984	0.93
biological_process	GO:2000678	negative regulation of transcription regulatory region DNA binding	0.00140984	0.93
biological_process	GO:0006006	glucose metabolic process	0.00141353	0.93
biological_process	GO:0035690	cellular response to drug	0.00141635	0.93
biological_process	GO:0045087	innate immune response	0.00142569	0.93
molecular_function	GO:0003713	transcription coactivator activity	0.00316166	0.93
cellular_component	GO:0019774	proteasome core complex, beta-subunit complex	0.00423784	0.93
biological_process	GO:0032943	mononuclear cell proliferation	0.00145596	0.94
molecular_function	GO:0070412	R-SMAD binding	0.00331193	0.95
molecular_function	GO:0019901	protein kinase binding	0.00337226	0.95
molecular_function	GO:0031690	adrenergic receptor binding	0.00412548	0.95
cellular_component	GO:0071437	invadopodium	0.00538109	0.96
cellular_component	GO:0035097	histone methyltransferase complex	0.00538696	0.96
cellular_component	GO:0034708	methyltransferase complex	0.00563714	0.96
cellular_component	GO:0005887	integral component of plasma membrane	0.0056965	0.96
cellular_component	GO:1904724	tertiary granule lumen	0.00588295	0.96
cellular_component	GO:0099060	integral component of postsynaptic specialization membrane	0.00608272	0.96
cellular_component	GO:0030139	endocytic vesicle	0.00640651	0.96
cellular_component	GO:0005942	phosphatidylinositol 3-kinase complex	0.00700424	0.96
cellular_component	GO:0060076	excitatory synapse	0.00702669	0.96
cellular_component	GO:0099061	integral component of postsynaptic density membrane	0.00702669	0.96
cellular_component	GO:0030176	integral component of endoplasmic reticulum membrane	0.00709747	0.96
biological_process	GO:0001550	ovarian cumulus expansion	0.00145814	0.97
biological_process	GO:0048165	fused antrum stage	0.00145814	0.97
biological_process	GO:0051595	response to methylglyoxal	0.00145814	0.97
biological_process	GO:1901407	regulation of phosphorylation of RNA polymerase II C-terminal domain	0.00145814	0.97
biological_process	GO:1903750	regulation of intrinsic apoptotic signaling pathway in response to hydrogen peroxide	0.00145814	0.97
biological_process	GO:1903751	negative regulation of intrinsic apoptotic signaling pathway in response to hydrogen peroxide	0.00145814	0.97
biological_process	GO:2000638	regulation of SREBP signaling pathway	0.00145814	0.97
biological_process	GO:0050766	positive regulation of phagocytosis	0.00147806	0.97
biological_process	GO:0007520	myoblast fusion	0.00148727	0.97
biological_process	GO:0002690	positive regulation of leukocyte chemotaxis	0.00149139	0.97
biological_process	GO:0048732	gland development	0.00150588	0.97
biological_process	GO:0061458	reproductive system development	0.00150588	0.97
biological_process	GO:0051270	regulation of cellular component movement	0.00151748	0.97
biological_process	GO:0006631	fatty acid metabolic process	0.00155534	0.97
biological_process	GO:0031589	cell-substrate adhesion	0.00157344	0.97
biological_process	GO:0008610	lipid biosynthetic process	0.00157355	0.97
biological_process	GO:0072539	T-helper 17 cell differentiation	0.00157514	0.97
biological_process	GO:0002286	T cell activation involved in immune response	0.00157949	0.97
biological_process	GO:0043549	regulation of kinase activity	0.00158677	0.97
biological_process	GO:0019229	regulation of vasoconstriction	0.00163549	0.98
biological_process	GO:0002824	positive regulation of adaptive immune response based on somatic recombination of immune receptors built from immunoglobulin superfamily domains	0.00163763	0.98
biological_process	GO:0010038	response to metal ion	0.00165167	0.98
biological_process	GO:1904996	positive regulation of leukocyte adhesion to vascular endothelial cell	0.00165858	0.98
biological_process	GO:0035966	response to topologically incorrect protein	0.00167605	0.98
biological_process	GO:0009887	animal organ morphogenesis	0.00167947	0.98
biological_process	GO:0006953	acute-phase response	0.00170034	0.98
biological_process	GO:0045670	regulation of osteoclast differentiation	0.00170877	0.98
biological_process	GO:0034612	response to tumor necrosis factor	0.00173324	0.98
biological_process	GO:0051726	regulation of cell cycle	0.00173842	0.98
biological_process	GO:0006094	gluconeogenesis	0.00175432	0.98
biological_process	GO:0032642	regulation of chemokine production	0.00175432	0.98
biological_process	GO:0070661	leukocyte proliferation	0.00177885	0.98
cellular_component	GO:0005577	fibrinogen complex	0.00716642	0.98
cellular_component	GO:0008024	cyclin/CDK positive transcription elongation factor complex	0.00716642	0.98
cellular_component	GO:0031226	intrinsic component of plasma membrane	0.00767737	0.98
cellular_component	GO:0031227	intrinsic component of endoplasmic reticulum membrane	0.00768194	0.98
cellular_component	GO:0030659	cytoplasmic vesicle membrane	0.0077264	0.98
cellular_component	GO:0030864	cortical actin cytoskeleton	0.00875607	0.98
cellular_component	GO:0098948	intrinsic component of postsynaptic specialization membrane	0.00901588	0.98
biological_process	GO:0033605	positive regulation of catecholamine secretion	0.00178868	0.99
biological_process	GO:0071356	cellular response to tumor necrosis factor	0.00179956	0.99
biological_process	GO:0022612	gland morphogenesis	0.00185348	0.99
biological_process	GO:0071456	cellular response to hypoxia	0.00185611	0.99
biological_process	GO:0031638	zymogen activation	0.00185854	0.99
biological_process	GO:1903530	regulation of secretion by cell	0.00194773	0.99
biological_process	GO:0002688	regulation of leukocyte chemotaxis	0.00195117	0.99
biological_process	GO:0032680	regulation of tumor necrosis factor production	0.00196977	0.99
biological_process	GO:0120036	plasma membrane bounded cell projection organization	0.00197591	0.99
biological_process	GO:0032602	chemokine production	0.00199585	0.99
biological_process	GO:0097306	cellular response to alcohol	0.00199585	0.99
biological_process	GO:0043243	positive regulation of protein-containing complex disassembly	0.00201755	0.99
biological_process	GO:0016051	carbohydrate biosynthetic process	0.00202822	0.99
biological_process	GO:0032729	positive regulation of interferon-gamma production	0.00203222	0.99
biological_process	GO:0043524	negative regulation of neuron apoptotic process	0.00203964	0.99
biological_process	GO:0032534	regulation of microvillus assembly	0.00205027	0.99
biological_process	GO:0043152	induction of bacterial agglutination	0.00205027	0.99
biological_process	GO:0048549	positive regulation of pinocytosis	0.00205027	0.99
biological_process	GO:0071608	macrophage inflammatory protein-1 alpha production	0.00205027	0.99
biological_process	GO:0071640	regulation of macrophage inflammatory protein 1 alpha production	0.00205027	0.99
biological_process	GO:2001015	negative regulation of skeletal muscle cell differentiation	0.00205027	0.99
biological_process	GO:0032648	regulation of interferon-beta production	0.00209351	0.99
biological_process	GO:0060341	regulation of cellular localization	0.00211176	0.99
biological_process	GO:0001975	response to amphetamine	0.00211621	0.99
biological_process	GO:0032814	regulation of natural killer cell activation	0.00211621	0.99
biological_process	GO:0060674	placenta blood vessel development	0.00211621	0.99
biological_process	GO:0006735	NADH regeneration	0.00212755	0.99
biological_process	GO:0061621	canonical glycolysis	0.00212755	0.99
biological_process	GO:0061718	glucose catabolic process to pyruvate	0.00212755	0.99
biological_process	GO:0002504	antigen processing and presentation of peptide or polysaccharide antigen via MHC class II	0.00213827	0.99
biological_process	GO:2000379	positive regulation of reactive oxygen species metabolic process	0.00213827	0.99
biological_process	GO:0046651	lymphocyte proliferation	0.0021568	0.99
biological_process	GO:0018393	internal peptidyl-lysine acetylation	0.00218025	0.99
biological_process	GO:0062013	positive regulation of small molecule metabolic process	0.00218094	0.99
biological_process	GO:2000145	regulation of cell motility	0.00221847	0.99
biological_process	GO:0034614	cellular response to reactive oxygen species	0.00223685	0.99
biological_process	GO:0071706	tumor necrosis factor superfamily cytokine production	0.00223685	0.99
biological_process	GO:0022411	cellular component disassembly	0.00224069	0.99
biological_process	GO:0030030	cell projection organization	0.0022839	0.99
biological_process	GO:0071674	mononuclear cell migration	0.00229787	0.99
biological_process	GO:0019884	antigen processing and presentation of exogenous antigen	0.00232492	0.99
biological_process	GO:0061138	morphogenesis of a branching epithelium	0.00232492	0.99
biological_process	GO:0050921	positive regulation of chemotaxis	0.00232847	0.99
biological_process	GO:0072332	intrinsic apoptotic signaling pathway by p53 class mediator	0.00240106	0.99
biological_process	GO:0009612	response to mechanical stimulus	0.00241429	0.99
biological_process	GO:1903747	regulation of establishment of protein localization to mitochondrion	0.0024188	0.99
biological_process	GO:0050708	regulation of protein secretion	0.00242752	0.99
biological_process	GO:0051023	regulation of immunoglobulin secretion	0.0024504	0.99
biological_process	GO:0023061	signal release	0.00246329	0.99
biological_process	GO:0018394	peptidyl-lysine acetylation	0.00246593	0.99
biological_process	GO:0060538	skeletal muscle organ development	0.00246593	0.99
biological_process	GO:0006986	response to unfolded protein	0.00251293	0.99
biological_process	GO:0030316	osteoclast differentiation	0.00254022	0.99
biological_process	GO:0043123	positive regulation of I-kappaB kinase/NF-kappaB signaling	0.00255131	0.99
biological_process	GO:0006084	acetyl-CoA metabolic process	0.00255274	0.99
biological_process	GO:0051248	negative regulation of protein metabolic process	0.00255484	0.99
biological_process	GO:0060284	regulation of cell development	0.00261088	0.99
biological_process	GO:0045639	positive regulation of myeloid cell differentiation	0.00263748	0.99
biological_process	GO:0032640	tumor necrosis factor production	0.00265968	0.99
biological_process	GO:1903555	regulation of tumor necrosis factor superfamily cytokine production	0.00265968	0.99
biological_process	GO:0043030	regulation of macrophage activation	0.00271051	0.99
biological_process	GO:0045682	regulation of epidermis development	0.00272129	0.99
molecular_function	GO:0001846	opsonin binding	0.00493457	0.99
molecular_function	GO:0042803	protein homodimerization activity	0.00508255	0.99
cellular_component	GO:0005829	cytosol	0.0106585	0.99
cellular_component	GO:0005768	endosome	0.0106911	0.99
cellular_component	GO:0071556	integral component of lumenal side of endoplasmic reticulum membrane	0.0110962	0.99
cellular_component	GO:0098553	lumenal side of endoplasmic reticulum membrane	0.0110962	0.99
biological_process	GO:0071157	negative regulation of cell cycle arrest	0.00276112	1
biological_process	GO:0007010	cytoskeleton organization	0.00278074	1
biological_process	GO:0008360	regulation of cell shape	0.00279002	1
biological_process	GO:0032233	positive regulation of actin filament bundle assembly	0.00279827	1
biological_process	GO:0002761	regulation of myeloid leukocyte differentiation	0.00280146	1
biological_process	GO:0061615	glycolytic process through fructose-6-phosphate	0.00282376	1
biological_process	GO:0061620	glycolytic process through glucose-6-phosphate	0.00282376	1
biological_process	GO:0007015	actin filament organization	0.0028362	1
biological_process	GO:0032787	monocarboxylic acid metabolic process	0.00283919	1
biological_process	GO:0097305	response to alcohol	0.0028451	1
biological_process	GO:0009894	regulation of catabolic process	0.00284704	1
biological_process	GO:1903214	regulation of protein targeting to mitochondrion	0.00287917	1
biological_process	GO:0035871	protein K11-linked deubiquitination	0.00288185	1
biological_process	GO:1900222	negative regulation of amyloid-beta clearance	0.00288185	1
biological_process	GO:2001135	regulation of endocytic recycling	0.00288185	1
biological_process	GO:0045807	positive regulation of endocytosis	0.00289467	1
biological_process	GO:0007411	axon guidance	0.00290213	1
biological_process	GO:0031623	receptor internalization	0.00296524	1
biological_process	GO:0035710	CD4-positive, alpha-beta T cell activation	0.00301825	1
biological_process	GO:0022406	membrane docking	0.00302799	1
biological_process	GO:0030182	neuron differentiation	0.00303023	1
biological_process	GO:0045859	regulation of protein kinase activity	0.00307956	1
biological_process	GO:0043112	receptor metabolic process	0.00308567	1
biological_process	GO:0032608	interferon-beta production	0.00310466	1
biological_process	GO:0097485	neuron projection guidance	0.00312002	1
biological_process	GO:0050865	regulation of cell activation	0.00315144	1
biological_process	GO:1905521	regulation of macrophage migration	0.00319694	1
biological_process	GO:0071375	cellular response to peptide hormone stimulus	0.00322666	1
biological_process	GO:0050730	regulation of peptidyl-tyrosine phosphorylation	0.00324154	1
biological_process	GO:0006091	generation of precursor metabolites and energy	0.0032428	1
biological_process	GO:0002791	regulation of peptide secretion	0.00324427	1
biological_process	GO:0030324	lung development	0.00327765	1
biological_process	GO:0006810	transport	0.00328497	1
biological_process	GO:0099601	regulation of neurotransmitter receptor activity	0.00328925	1
biological_process	GO:0032623	interleukin-2 production	0.00331161	1
biological_process	GO:0010821	regulation of mitochondrion organization	0.00331768	1
biological_process	GO:0014902	myotube differentiation	0.00333978	1
biological_process	GO:1901654	response to ketone	0.00336776	1
biological_process	GO:0034284	response to monosaccharide	0.00338313	1
biological_process	GO:0001890	placenta development	0.00341145	1
biological_process	GO:0010605	negative regulation of macromolecule metabolic process	0.00343747	1
biological_process	GO:0035249	synaptic transmission, glutamatergic	0.00344392	1
biological_process	GO:0003158	endothelium development	0.00344929	1
biological_process	GO:0007610	behavior	0.00347633	1
biological_process	GO:0051146	striated muscle cell differentiation	0.00347985	1
biological_process	GO:0097009	energy homeostasis	0.00348277	1
biological_process	GO:1901741	positive regulation of myoblast fusion	0.00350371	1
biological_process	GO:2001169	regulation of ATP biosynthetic process	0.00350371	1
biological_process	GO:0031098	stress-activated protein kinase signaling cascade	0.00351814	1
biological_process	GO:0042136	neurotransmitter biosynthetic process	0.00353474	1
biological_process	GO:0051179	localization	0.00357283	1
biological_process	GO:0042592	homeostatic process	0.00364491	1
biological_process	GO:0033043	regulation of organelle organization	0.00366759	1
biological_process	GO:0045667	regulation of osteoblast differentiation	0.00369226	1
biological_process	GO:0007200	phospholipase C-activating G protein-coupled receptor signaling pathway	0.00372888	1
biological_process	GO:0032528	microvillus organization	0.00373504	1
biological_process	GO:0019674	NAD metabolic process	0.00374206	1
biological_process	GO:0032609	interferon-gamma production	0.00375325	1
biological_process	GO:0033143	regulation of intracellular steroid hormone receptor signaling pathway	0.00381316	1
biological_process	GO:0007169	transmembrane receptor protein tyrosine kinase signaling pathway	0.00382045	1
biological_process	GO:0043086	negative regulation of catalytic activity	0.00382684	1
biological_process	GO:0007519	skeletal muscle tissue development	0.00383567	1
biological_process	GO:0051241	negative regulation of multicellular organismal process	0.00384988	1
biological_process	GO:0034330	cell junction organization	0.0038972	1
biological_process	GO:0061448	connective tissue development	0.00392399	1
biological_process	GO:0002369	T cell cytokine production	0.00396529	1
biological_process	GO:0016032	viral process	0.00418606	1
biological_process	GO:0002495	antigen processing and presentation of peptide antigen via MHC class II	0.00421584	1
biological_process	GO:0032649	regulation of interferon-gamma production	0.00421584	1
biological_process	GO:1903008	organelle disassembly	0.00421584	1
biological_process	GO:0032637	interleukin-8 production	0.00426316	1
biological_process	GO:0071801	regulation of podosome assembly	0.0042701	1
biological_process	GO:0097191	extrinsic apoptotic signaling pathway	0.00427492	1
biological_process	GO:0010883	regulation of lipid storage	0.00428944	1
biological_process	GO:0071354	cellular response to interleukin-6	0.00428944	1
biological_process	GO:1904036	negative regulation of epithelial cell apoptotic process	0.00428944	1
biological_process	GO:0010046	response to mycotoxin	0.00435412	1
biological_process	GO:0022605	mammalian oogenesis stage	0.00435412	1
biological_process	GO:1900038	negative regulation of cellular response to hypoxia	0.00435412	1
biological_process	GO:0045622	regulation of T-helper cell differentiation	0.00438842	1
biological_process	GO:0008284	positive regulation of cell population proliferation	0.00439142	1
biological_process	GO:0090066	regulation of anatomical structure size	0.00441621	1
biological_process	GO:0018108	peptidyl-tyrosine phosphorylation	0.00446383	1
biological_process	GO:0060326	cell chemotaxis	0.00446952	1
biological_process	GO:0002526	acute inflammatory response	0.00447914	1
biological_process	GO:0009620	response to fungus	0.00448135	1
biological_process	GO:2000677	regulation of transcription regulatory region DNA binding	0.00448135	1
biological_process	GO:0009306	protein secretion	0.00454403	1
biological_process	GO:0031663	lipopolysaccharide-mediated signaling pathway	0.00456724	1
biological_process	GO:1902041	regulation of extrinsic apoptotic signaling pathway via death domain receptors	0.00456724	1
biological_process	GO:1903749	positive regulation of establishment of protein localization to mitochondrion	0.00456724	1
biological_process	GO:0036498	IRE1-mediated unfolded protein response	0.00457045	1
biological_process	GO:0002576	platelet degranulation	0.00457408	1
biological_process	GO:0002687	positive regulation of leukocyte migration	0.00457408	1
biological_process	GO:0000302	response to reactive oxygen species	0.00457463	1
biological_process	GO:0071692	protein localization to extracellular region	0.0046029	1
biological_process	GO:0051234	establishment of localization	0.00464415	1
biological_process	GO:0051100	negative regulation of binding	0.0046725	1
biological_process	GO:0030323	respiratory tube development	0.00470511	1
biological_process	GO:0009892	negative regulation of metabolic process	0.00470524	1
biological_process	GO:0035592	establishment of protein localization to extracellular region	0.00475877	1
biological_process	GO:0002923	regulation of humoral immune response mediated by circulating immunoglobulin	0.00479258	1
biological_process	GO:0006857	oligopeptide transport	0.00479258	1
biological_process	GO:0048548	regulation of pinocytosis	0.00479258	1
biological_process	GO:0060525	prostate glandular acinus development	0.00479258	1
biological_process	GO:0071803	positive regulation of podosome assembly	0.00479258	1
biological_process	GO:0072683	T cell extravasation	0.00479258	1
biological_process	GO:1903977	positive regulation of glial cell migration	0.00479258	1
biological_process	GO:0002827	positive regulation of T-helper 1 type immune response	0.00486891	1
biological_process	GO:0032816	positive regulation of natural killer cell activation	0.00486891	1
biological_process	GO:0070262	peptidyl-serine dephosphorylation	0.00486891	1
biological_process	GO:0090195	chemokine secretion	0.00486891	1
biological_process	GO:0050873	brown fat cell differentiation	0.0048739	1
biological_process	GO:0032269	negative regulation of cellular protein metabolic process	0.00490536	1
biological_process	GO:0009299	mRNA transcription	0.00495439	1
biological_process	GO:0002790	peptide secretion	0.00498806	1
biological_process	GO:0052548	regulation of endopeptidase activity	0.00502421	1
biological_process	GO:0002699	positive regulation of immune effector process	0.00503488	1
biological_process	GO:0007517	muscle organ development	0.00504361	1
biological_process	GO:0007043	cell-cell junction assembly	0.00507706	1
biological_process	GO:0060541	respiratory system development	0.00513097	1
biological_process	GO:0042098	T cell proliferation	0.00514549	1
biological_process	GO:0043409	negative regulation of MAPK cascade	0.00514549	1
biological_process	GO:0048598	embryonic morphogenesis	0.00515139	1
biological_process	GO:0071383	cellular response to steroid hormone stimulus	0.0051705	1
biological_process	GO:0071326	cellular response to monosaccharide stimulus	0.0052183	1
biological_process	GO:0002694	regulation of leukocyte activation	0.00525813	1
biological_process	GO:0010822	positive regulation of mitochondrion organization	0.00525859	1
biological_process	GO:0018212	peptidyl-tyrosine modification	0.00533011	1
biological_process	GO:0001878	response to yeast	0.00533693	1
biological_process	GO:0002439	chronic inflammatory response to antigenic stimulus	0.00533693	1
biological_process	GO:0034124	regulation of MyD88-dependent toll-like receptor signaling pathway	0.00533693	1
biological_process	GO:0036146	cellular response to mycotoxin	0.00533693	1
biological_process	GO:0051790	short-chain fatty acid biosynthetic process	0.00533693	1
biological_process	GO:0071733	transcriptional activation by promoter-enhancer looping	0.00533693	1
biological_process	GO:0090202	gene looping	0.00533693	1
biological_process	GO:0090579	dsDNA loop formation	0.00533693	1
biological_process	GO:0097167	circadian regulation of translation	0.00533693	1
biological_process	GO:1900138	negative regulation of phospholipase A2 activity	0.00533693	1
biological_process	GO:1990168	protein K33-linked deubiquitination	0.00533693	1
biological_process	GO:2000351	regulation of endothelial cell apoptotic process	0.00537623	1
biological_process	GO:0051186	cofactor metabolic process	0.00538504	1
biological_process	GO:0006090	pyruvate metabolic process	0.00542581	1
biological_process	GO:0050777	negative regulation of immune response	0.00542581	1
molecular_function	GO:0008429	phosphatidylethanolamine binding	0.00543406	1
molecular_function	GO:0043422	protein kinase B binding	0.00543406	1
biological_process	GO:0002755	MyD88-dependent toll-like receptor signaling pathway	0.00546965	1
biological_process	GO:0006007	glucose catabolic process	0.00546965	1
biological_process	GO:0033762	response to glucagon	0.00546965	1
molecular_function	GO:0005102	signaling receptor binding	0.00551136	1
biological_process	GO:0071560	cellular response to transforming growth factor beta stimulus	0.00555494	1
biological_process	GO:0007179	transforming growth factor beta receptor signaling pathway	0.00556404	1
biological_process	GO:0043405	regulation of MAP kinase activity	0.0055808	1
biological_process	GO:0046390	ribose phosphate biosynthetic process	0.00558686	1
biological_process	GO:0044093	positive regulation of molecular function	0.00579962	1
molecular_function	GO:0030060	L-malate dehydrogenase activity	0.0058013	1
molecular_function	GO:0047655	allyl-alcohol dehydrogenase activity	0.0058013	1
biological_process	GO:0051347	positive regulation of transferase activity	0.00585406	1
biological_process	GO:0045089	positive regulation of innate immune response	0.00592899	1
biological_process	GO:1902903	regulation of supramolecular fiber organization	0.00596582	1
biological_process	GO:0001503	ossification	0.00597115	1
biological_process	GO:0006979	response to oxidative stress	0.00597499	1
biological_process	GO:0002064	epithelial cell development	0.0059829	1
biological_process	GO:0060333	interferon-gamma-mediated signaling pathway	0.00600775	1
biological_process	GO:0002675	positive regulation of acute inflammatory response	0.00602713	1
biological_process	GO:0002724	regulation of T cell cytokine production	0.00602713	1
molecular_function	GO:0005126	cytokine receptor binding	0.00609021	1
biological_process	GO:0043269	regulation of ion transport	0.00612606	1
biological_process	GO:0001780	neutrophil homeostasis	0.00618364	1
biological_process	GO:0006957	complement activation, alternative pathway	0.00618364	1
biological_process	GO:0030033	microvillus assembly	0.00618364	1
biological_process	GO:0032225	regulation of synaptic transmission, dopaminergic	0.00618364	1
biological_process	GO:0034116	positive regulation of heterotypic cell-cell adhesion	0.00618364	1
biological_process	GO:0045618	positive regulation of keratinocyte differentiation	0.00618364	1
biological_process	GO:0045623	negative regulation of T-helper cell differentiation	0.00618364	1
biological_process	GO:0090335	regulation of brown fat cell differentiation	0.00618364	1
biological_process	GO:0030850	prostate gland development	0.00620501	1
biological_process	GO:0043966	histone H3 acetylation	0.00629655	1
biological_process	GO:0051851	modulation by host of symbiont process	0.00629655	1
biological_process	GO:0035384	thioester biosynthetic process	0.00631108	1
biological_process	GO:0071616	acyl-CoA biosynthetic process	0.00631108	1
biological_process	GO:0019886	antigen processing and presentation of exogenous peptide antigen via MHC class II	0.00639175	1
biological_process	GO:0045637	regulation of myeloid cell differentiation	0.00639669	1
biological_process	GO:0060765	regulation of androgen receptor signaling pathway	0.00645627	1
biological_process	GO:0007612	learning	0.00645654	1
biological_process	GO:0007417	central nervous system development	0.00649268	1
biological_process	GO:0019318	hexose metabolic process	0.00650768	1
biological_process	GO:0061564	axon development	0.00653613	1
biological_process	GO:0032682	negative regulation of chemokine production	0.00659844	1
biological_process	GO:0035743	CD4-positive, alpha-beta T cell cytokine production	0.00659844	1
biological_process	GO:0072010	glomerular epithelium development	0.00659844	1
biological_process	GO:1901739	regulation of myoblast fusion	0.00659844	1
biological_process	GO:2000316	regulation of T-helper 17 type immune response	0.00659844	1
biological_process	GO:0007050	cell cycle arrest	0.00661439	1
biological_process	GO:0010565	regulation of cellular ketone metabolic process	0.00662413	1
biological_process	GO:0071346	cellular response to interferon-gamma	0.00662413	1
biological_process	GO:1901575	organic substance catabolic process	0.00668533	1
biological_process	GO:0009746	response to hexose	0.00705176	1
biological_process	GO:0042542	response to hydrogen peroxide	0.00708739	1
biological_process	GO:0051384	response to glucocorticoid	0.00708739	1
biological_process	GO:2000377	regulation of reactive oxygen species metabolic process	0.00711212	1
biological_process	GO:0019693	ribose phosphate metabolic process	0.00712803	1
biological_process	GO:0030168	platelet activation	0.00715351	1
biological_process	GO:0050729	positive regulation of inflammatory response	0.00715351	1
biological_process	GO:0032760	positive regulation of tumor necrosis factor production	0.00717898	1
biological_process	GO:0007178	transmembrane receptor protein serine/threonine kinase signaling pathway	0.00730045	1
biological_process	GO:0045604	regulation of epidermal cell differentiation	0.00733859	1
biological_process	GO:0045860	positive regulation of protein kinase activity	0.00737819	1
biological_process	GO:0008347	glial cell migration	0.00738766	1
biological_process	GO:0032757	positive regulation of interleukin-8 production	0.00738766	1
biological_process	GO:0044273	sulfur compound catabolic process	0.00742554	1
biological_process	GO:0050920	regulation of chemotaxis	0.00743367	1
biological_process	GO:0051346	negative regulation of hydrolase activity	0.00745217	1
biological_process	GO:0006069	ethanol oxidation	0.00745513	1
biological_process	GO:0032429	regulation of phospholipase A2 activity	0.00745513	1
biological_process	GO:0060670	branching involved in labyrinthine layer morphogenesis	0.00745513	1
biological_process	GO:0072540	T-helper 17 cell lineage commitment	0.00745513	1
biological_process	GO:0042180	cellular ketone metabolic process	0.00748411	1
biological_process	GO:1904062	regulation of cation transmembrane transport	0.00750689	1
biological_process	GO:0007163	establishment or maintenance of cell polarity	0.00752949	1
biological_process	GO:0045907	positive regulation of vasoconstriction	0.0075575	1
biological_process	GO:0051968	positive regulation of synaptic transmission, glutamatergic	0.0075575	1
biological_process	GO:0055094	response to lipoprotein particle	0.0075575	1
biological_process	GO:0071295	cellular response to vitamin	0.0075575	1
biological_process	GO:1903955	positive regulation of protein targeting to mitochondrion	0.0075575	1
biological_process	GO:0007589	body fluid secretion	0.0076439	1
biological_process	GO:0051952	regulation of amine transport	0.0076439	1
biological_process	GO:0007154	cell communication	0.00768776	1
biological_process	GO:0043244	regulation of protein-containing complex disassembly	0.00778577	1
biological_process	GO:0023052	signaling	0.007814	1
biological_process	GO:0009132	nucleoside diphosphate metabolic process	0.00782176	1
molecular_function	GO:0016922	nuclear receptor binding	0.00783693	1
biological_process	GO:0032677	regulation of interleukin-8 production	0.00792422	1
biological_process	GO:0001701	in utero embryonic development	0.00792524	1
biological_process	GO:0003062	regulation of heart rate by chemical signal	0.00792917	1
biological_process	GO:0014908	myotube differentiation involved in skeletal muscle regeneration	0.00792917	1
biological_process	GO:0043320	natural killer cell degranulation	0.00792917	1
biological_process	GO:0045916	negative regulation of complement activation	0.00792917	1
biological_process	GO:0110095	cellular detoxification of aldehyde	0.00792917	1
biological_process	GO:1905456	regulation of lymphoid progenitor cell differentiation	0.00792917	1
biological_process	GO:2001182	regulation of interleukin-12 secretion	0.00792917	1
biological_process	GO:0001101	response to acid chemical	0.00795283	1
biological_process	GO:0010001	glial cell differentiation	0.0080011	1
biological_process	GO:0002698	negative regulation of immune effector process	0.00801221	1
biological_process	GO:0001568	blood vessel development	0.00803228	1
biological_process	GO:0015837	amine transport	0.00803912	1
biological_process	GO:0070498	interleukin-1-mediated signaling pathway	0.00803912	1
biological_process	GO:0042176	regulation of protein catabolic process	0.00812333	1
biological_process	GO:0072358	cardiovascular system development	0.00814471	1
biological_process	GO:0033674	positive regulation of kinase activity	0.00815987	1
biological_process	GO:0007596	blood coagulation	0.00817916	1
biological_process	GO:0006473	protein acetylation	0.00821739	1
biological_process	GO:1901135	carbohydrate derivative metabolic process	0.0082374	1
molecular_function	GO:0043014	alpha-tubulin binding	0.00824102	1
biological_process	GO:0048246	macrophage chemotaxis	0.00824658	1
biological_process	GO:1905898	positive regulation of response to endoplasmic reticulum stress	0.00824658	1
biological_process	GO:0033866	nucleoside bisphosphate biosynthetic process	0.00824832	1
biological_process	GO:0034030	ribonucleoside bisphosphate biosynthetic process	0.00824832	1
biological_process	GO:0034033	purine nucleoside bisphosphate biosynthetic process	0.00824832	1
biological_process	GO:0035924	cellular response to vascular endothelial growth factor stimulus	0.00824832	1
biological_process	GO:0000188	inactivation of MAPK activity	0.00827889	1
biological_process	GO:0002021	response to dietary excess	0.00827889	1
biological_process	GO:0002825	regulation of T-helper 1 type immune response	0.00827889	1
biological_process	GO:0060143	positive regulation of syncytium formation by plasma membrane fusion	0.00827889	1
biological_process	GO:0046683	response to organophosphorus	0.00833191	1
biological_process	GO:0030330	DNA damage response, signal transduction by p53 class mediator	0.00836974	1
biological_process	GO:0071559	response to transforming growth factor beta	0.00840485	1
molecular_function	GO:0004859	phospholipase inhibitor activity	0.00842846	1
molecular_function	GO:0042975	peroxisome proliferator activated receptor binding	0.00842846	1
biological_process	GO:0002683	negative regulation of immune system process	0.00847599	1
biological_process	GO:0061041	regulation of wound healing	0.00850209	1
biological_process	GO:0040007	growth	0.00851297	1
biological_process	GO:0070059	intrinsic apoptotic signaling pathway in response to endoplasmic reticulum stress	0.00851312	1
biological_process	GO:0140056	organelle localization by membrane tethering	0.00854104	1
biological_process	GO:0031960	response to corticosteroid	0.0085526	1
biological_process	GO:0008652	cellular amino acid biosynthetic process	0.00858506	1
biological_process	GO:0034109	homotypic cell-cell adhesion	0.00858506	1
biological_process	GO:0008104	protein localization	0.00860919	1
biological_process	GO:0014002	astrocyte development	0.00861403	1
biological_process	GO:0045446	endothelial cell differentiation	0.00864115	1
biological_process	GO:0035729	cellular response to hepatocyte growth factor stimulus	0.00865186	1
biological_process	GO:0043923	positive regulation by host of viral transcription	0.00865186	1
biological_process	GO:0061318	renal filtration cell differentiation	0.00865186	1
biological_process	GO:0072112	glomerular visceral epithelial cell differentiation	0.00865186	1
biological_process	GO:1903975	regulation of glial cell migration	0.00865186	1
biological_process	GO:0000768	syncytium formation by plasma membrane fusion	0.00868982	1
biological_process	GO:0031295	T cell costimulation	0.00868982	1
biological_process	GO:0140253	cell-cell fusion	0.00868982	1
biological_process	GO:0014009	glial cell proliferation	0.00874019	1
biological_process	GO:0042359	vitamin D metabolic process	0.00874571	1
biological_process	GO:0044321	response to leptin	0.00874571	1
biological_process	GO:0051457	maintenance of protein location in nucleus	0.00874571	1
biological_process	GO:0030522	intracellular receptor signaling pathway	0.00894169	1
biological_process	GO:0048661	positive regulation of smooth muscle cell proliferation	0.00898314	1
biological_process	GO:0046879	hormone secretion	0.00912708	1
biological_process	GO:1903557	positive regulation of tumor necrosis factor superfamily cytokine production	0.00914911	1
biological_process	GO:0043484	regulation of RNA splicing	0.0091534	1
biological_process	GO:0071331	cellular response to hexose stimulus	0.0091534	1
biological_process	GO:0052547	regulation of peptidase activity	0.00921592	1
biological_process	GO:0043433	negative regulation of DNA-binding transcription factor activity	0.00927646	1
biological_process	GO:0014074	response to purine-containing compound	0.0092918	1
biological_process	GO:0030856	regulation of epithelial cell differentiation	0.00931285	1
molecular_function	GO:0008092	cytoskeletal protein binding	0.00934791	1
biological_process	GO:0036314	response to sterol	0.00936709	1
biological_process	GO:2000352	negative regulation of endothelial cell apoptotic process	0.00936709	1
biological_process	GO:0002460	adaptive immune response based on somatic recombination of immune receptors built from immunoglobulin superfamily domains	0.009388	1
biological_process	GO:0051051	negative regulation of transport	0.00947163	1
biological_process	GO:0007409	axonogenesis	0.00950154	1
biological_process	GO:0044282	small molecule catabolic process	0.00952253	1
biological_process	GO:0002253	activation of immune response	0.00953332	1
biological_process	GO:0034341	response to interferon-gamma	0.00967132	1
biological_process	GO:0032868	response to insulin	0.00975876	1
biological_process	GO:0046031	ADP metabolic process	0.00977663	1
biological_process	GO:1903409	reactive oxygen species biosynthetic process	0.00977663	1
biological_process	GO:0050767	regulation of neurogenesis	0.00979684	1
biological_process	GO:0044255	cellular lipid metabolic process	0.00980823	1
molecular_function	GO:0046875	ephrin receptor binding	0.00980999	1
biological_process	GO:0009260	ribonucleotide biosynthetic process	0.00989939	1
biological_process	GO:0033574	response to testosterone	0.00998783	1
biological_process	GO:0009914	hormone transport	0.00998955	1
biological_process	GO:0042692	muscle cell differentiation	0.0100533	1
biological_process	GO:0007254	JNK cascade	0.0100968	1
biological_process	GO:0006633	fatty acid biosynthetic process	0.0101144	1
biological_process	GO:0031294	lymphocyte costimulation	0.0101169	1
biological_process	GO:1903428	positive regulation of reactive oxygen species biosynthetic process	0.0101169	1
biological_process	GO:0060537	muscle tissue development	0.0101348	1
biological_process	GO:0001505	regulation of neurotransmitter levels	0.0102182	1
biological_process	GO:0021545	cranial nerve development	0.0102781	1
biological_process	GO:1904994	regulation of leukocyte adhesion to vascular endothelial cell	0.0104609	1
biological_process	GO:0001944	vasculature development	0.0104758	1
biological_process	GO:0001525	angiogenesis	0.0106382	1
biological_process	GO:0050867	positive regulation of cell activation	0.010804	1
biological_process	GO:0051099	positive regulation of binding	0.0108071	1
biological_process	GO:0048858	cell projection morphogenesis	0.0108148	1
biological_process	GO:0007599	hemostasis	0.0108515	1
biological_process	GO:0001818	negative regulation of cytokine production	0.0108541	1
biological_process	GO:0009152	purine ribonucleotide biosynthetic process	0.0109034	1
molecular_function	GO:0043621	protein self-association	0.010955	1
biological_process	GO:0042509	regulation of tyrosine phosphorylation of STAT protein	0.010961	1
biological_process	GO:0001765	membrane raft assembly	0.0109967	1
biological_process	GO:0002829	negative regulation of type 2 immune response	0.0109967	1
biological_process	GO:0035589	G protein-coupled purinergic nucleotide receptor signaling pathway	0.0109967	1
biological_process	GO:0035745	T-helper 2 cell cytokine production	0.0109967	1
biological_process	GO:0043301	negative regulation of leukocyte degranulation	0.0109967	1
biological_process	GO:0047484	regulation of response to osmotic stress	0.0109967	1
biological_process	GO:2001171	positive regulation of ATP biosynthetic process	0.0109967	1
biological_process	GO:0071322	cellular response to carbohydrate stimulus	0.0110411	1
biological_process	GO:0080135	regulation of cellular response to stress	0.0111553	1
cellular_component	GO:0033093	Weibel-Palade body	0.0112887	1
cellular_component	GO:0099146	intrinsic component of postsynaptic density membrane	0.0113327	1
biological_process	GO:0072331	signal transduction by p53 class mediator	0.0113428	1
biological_process	GO:0071305	cellular response to vitamin D	0.011364	1
biological_process	GO:0050817	coagulation	0.0114649	1
biological_process	GO:0043368	positive T cell selection	0.0114854	1
biological_process	GO:0043516	regulation of DNA damage response, signal transduction by p53 class mediator	0.0114854	1
biological_process	GO:0071402	cellular response to lipoprotein particle stimulus	0.0114854	1
biological_process	GO:2000273	positive regulation of signaling receptor activity	0.0114854	1
biological_process	GO:0009792	embryo development ending in birth or egg hatching	0.0115423	1
biological_process	GO:0016485	protein processing	0.0116286	1
biological_process	GO:0051702	interaction with symbiont	0.011641	1
biological_process	GO:0051937	catecholamine transport	0.011641	1
biological_process	GO:0007613	memory	0.0116738	1
biological_process	GO:0051153	regulation of striated muscle cell differentiation	0.0116738	1
biological_process	GO:2001257	regulation of cation channel activity	0.0116773	1
biological_process	GO:0006949	syncytium formation	0.0117202	1
biological_process	GO:0032722	positive regulation of chemokine production	0.0117202	1
molecular_function	GO:0048029	monosaccharide binding	0.0117515	1
biological_process	GO:0035994	response to muscle stretch	0.0117526	1
biological_process	GO:0036035	osteoclast development	0.0117526	1
biological_process	GO:0043011	myeloid dendritic cell differentiation	0.0117526	1
biological_process	GO:0060192	negative regulation of lipase activity	0.0117526	1
biological_process	GO:0072311	glomerular epithelial cell differentiation	0.0117526	1
biological_process	GO:0072574	hepatocyte proliferation	0.0117526	1
biological_process	GO:0072575	epithelial cell proliferation involved in liver morphogenesis	0.0117526	1
biological_process	GO:0090196	regulation of chemokine secretion	0.0117526	1
biological_process	GO:2000319	regulation of T-helper 17 cell differentiation	0.0117526	1
biological_process	GO:0032944	regulation of mononuclear cell proliferation	0.0118447	1
biological_process	GO:0006998	nuclear envelope organization	0.0120171	1
biological_process	GO:0015872	dopamine transport	0.0120171	1
biological_process	GO:0032653	regulation of interleukin-10 production	0.0120171	1
biological_process	GO:1900024	regulation of substrate adhesion-dependent cell spreading	0.0120171	1
biological_process	GO:0001678	cellular glucose homeostasis	0.012027	1
biological_process	GO:0001504	neurotransmitter uptake	0.0121359	1
cellular_component	GO:0002945	cyclin K-CDK13 complex	0.0121635	1
cellular_component	GO:0017177	glucosidase II complex	0.0121635	1
cellular_component	GO:0033257	Bcl3/NF-kappaB2 complex	0.0121635	1
cellular_component	GO:0034515	proteasome storage granule	0.0121635	1
cellular_component	GO:0036488	CHOP-C/EBP complex	0.0121635	1
cellular_component	GO:1990589	ATF4-CREB1 transcription factor complex	0.0121635	1
cellular_component	GO:1990617	CHOP-ATF4 complex	0.0121635	1
cellular_component	GO:1990622	CHOP-ATF3 complex	0.0121635	1
cellular_component	GO:1990730	VCP-NSFL1C complex	0.0121635	1
biological_process	GO:0002925	positive regulation of humoral immune response mediated by circulating immunoglobulin	0.0122155	1
biological_process	GO:0019541	propionate metabolic process	0.0122155	1
biological_process	GO:0022614	membrane to membrane docking	0.0122155	1
biological_process	GO:0035442	dipeptide transmembrane transport	0.0122155	1
biological_process	GO:0035523	protein K29-linked deubiquitination	0.0122155	1
biological_process	GO:0035617	stress granule disassembly	0.0122155	1
biological_process	GO:0036476	neuron death in response to hydrogen peroxide	0.0122155	1
biological_process	GO:0036481	intrinsic apoptotic signaling pathway in response to hydrogen peroxide	0.0122155	1
biological_process	GO:0042938	dipeptide transport	0.0122155	1
biological_process	GO:0043435	response to corticotropin-releasing hormone	0.0122155	1
biological_process	GO:0045338	farnesyl diphosphate metabolic process	0.0122155	1
biological_process	GO:0060676	ureteric bud formation	0.0122155	1
biological_process	GO:0071376	cellular response to corticotropin-releasing hormone stimulus	0.0122155	1
biological_process	GO:0097350	neutrophil clearance	0.0122155	1
biological_process	GO:0097368	establishment of Sertoli cell barrier	0.0122155	1
biological_process	GO:1903207	regulation of hydrogen peroxide-induced neuron death	0.0122155	1
biological_process	GO:1903208	negative regulation of hydrogen peroxide-induced neuron death	0.0122155	1
biological_process	GO:1903297	regulation of hypoxia-induced intrinsic apoptotic signaling pathway	0.0122155	1
biological_process	GO:1903298	negative regulation of hypoxia-induced intrinsic apoptotic signaling pathway	0.0122155	1
biological_process	GO:0032990	cell part morphogenesis	0.0122277	1
cellular_component	GO:0012506	vesicle membrane	0.0122532	1
biological_process	GO:0042531	positive regulation of tyrosine phosphorylation of STAT protein	0.0123093	1
biological_process	GO:0045445	myoblast differentiation	0.0123297	1
biological_process	GO:0097756	negative regulation of blood vessel diameter	0.0123297	1
biological_process	GO:1905897	regulation of response to endoplasmic reticulum stress	0.0123297	1
molecular_function	GO:0004629	phospholipase C activity	0.0123583	1
biological_process	GO:0003002	regionalization	0.0123879	1
molecular_function	GO:0016208	AMP binding	0.0123966	1
molecular_function	GO:0045159	myosin II binding	0.0123966	1
cellular_component	GO:0070821	tertiary granule membrane	0.0124379	1
cellular_component	GO:0010008	endosome membrane	0.0124501	1
biological_process	GO:0044403	symbiotic process	0.0124677	1
biological_process	GO:0048667	cell morphogenesis involved in neuron differentiation	0.0124694	1
molecular_function	GO:0002020	protease binding	0.0126112	1
biological_process	GO:0050707	regulation of cytokine secretion	0.0127077	1
molecular_function	GO:0050840	extracellular matrix binding	0.0127146	1
biological_process	GO:0009056	catabolic process	0.0127272	1
biological_process	GO:0051960	regulation of nervous system development	0.0127775	1
biological_process	GO:0001743	optic placode formation	0.0128642	1
biological_process	GO:0002268	follicular dendritic cell differentiation	0.0128642	1
biological_process	GO:0002384	hepatic immune response	0.0128642	1
biological_process	GO:0002876	positive regulation of chronic inflammatory response to antigenic stimulus	0.0128642	1
biological_process	GO:0019413	acetate biosynthetic process	0.0128642	1
biological_process	GO:0019427	acetyl-CoA biosynthetic process from acetate	0.0128642	1
biological_process	GO:0019542	propionate biosynthetic process	0.0128642	1
biological_process	GO:0034146	toll-like receptor 5 signaling pathway	0.0128642	1
biological_process	GO:0036482	neuron intrinsic apoptotic signaling pathway in response to hydrogen peroxide	0.0128642	1
biological_process	GO:0036496	regulation of translational initiation by eIF2 alpha dephosphorylation	0.0128642	1
biological_process	GO:0042539	hypotonic salinity response	0.0128642	1
biological_process	GO:0043449	cellular alkene metabolic process	0.0128642	1
biological_process	GO:0044033	multi-organism metabolic process	0.0128642	1
biological_process	GO:0044035	multi-organism catabolic process	0.0128642	1
biological_process	GO:0044115	development of symbiont involved in interaction with host	0.0128642	1
biological_process	GO:0044145	modulation of development of symbiont involved in interaction with host	0.0128642	1
biological_process	GO:0044147	negative regulation of development of symbiont involved in interaction with host	0.0128642	1
biological_process	GO:0045168	cell-cell signaling involved in cell fate commitment	0.0128642	1
biological_process	GO:0045957	negative regulation of complement activation, alternative pathway	0.0128642	1
biological_process	GO:0045994	positive regulation of translational initiation by iron	0.0128642	1
biological_process	GO:0046331	lateral inhibition	0.0128642	1
biological_process	GO:0046619	optic placode formation involved in camera-type eye formation	0.0128642	1
biological_process	GO:0051134	negative regulation of NK T cell activation	0.0128642	1
biological_process	GO:0052214	metabolism of substance in other organism involved in symbiotic interaction	0.0128642	1
biological_process	GO:0052227	catabolism of substance in other organism involved in symbiotic interaction	0.0128642	1
biological_process	GO:0052229	metabolism of macromolecule in other organism involved in symbiotic interaction	0.0128642	1
biological_process	GO:0052360	catabolism by host of symbiont macromolecule	0.0128642	1
biological_process	GO:0052361	catabolism by organism of macromolecule in other organism involved in symbiotic interaction	0.0128642	1
biological_process	GO:0052362	catabolism by host of symbiont protein	0.0128642	1
biological_process	GO:0052363	catabolism by organism of protein in other organism involved in symbiotic interaction	0.0128642	1
biological_process	GO:0052364	catabolism by host of substance in symbiont	0.0128642	1
biological_process	GO:0052416	metabolism by host of symbiont macromolecule	0.0128642	1
biological_process	GO:0052417	metabolism by host of symbiont protein	0.0128642	1
biological_process	GO:0052418	metabolism by organism of protein in other organism involved in symbiotic interaction	0.0128642	1
biological_process	GO:0052419	metabolism by host of substance in symbiont	0.0128642	1
biological_process	GO:0060567	negative regulation of DNA-templated transcription, termination	0.0128642	1
biological_process	GO:0060844	arterial endothelial cell fate commitment	0.0128642	1
biological_process	GO:0061394	regulation of transcription from RNA polymerase II promoter in response to arsenic-containing substance	0.0128642	1
biological_process	GO:0071477	cellular hypotonic salinity response	0.0128642	1
biological_process	GO:0071505	response to mycophenolic acid	0.0128642	1
biological_process	GO:0071506	cellular response to mycophenolic acid	0.0128642	1
biological_process	GO:0072554	blood vessel lumenization	0.0128642	1
biological_process	GO:0072566	chemokine (C-X-C motif) ligand 1 production	0.0128642	1
biological_process	GO:0090088	regulation of oligopeptide transport	0.0128642	1
biological_process	GO:0090089	regulation of dipeptide transport	0.0128642	1
biological_process	GO:0097238	cellular response to methylglyoxal	0.0128642	1
biological_process	GO:0120191	negative regulation of termination of RNA polymerase II transcription	0.0128642	1
biological_process	GO:1900756	protein processing in phagocytic vesicle	0.0128642	1
biological_process	GO:1901898	negative regulation of relaxation of cardiac muscle	0.0128642	1
biological_process	GO:1902257	negative regulation of apoptotic process involved in outflow tract morphogenesis	0.0128642	1
biological_process	GO:1902396	protein localization to bicellular tight junction	0.0128642	1
biological_process	GO:1902567	negative regulation of eosinophil activation	0.0128642	1
biological_process	GO:1902960	negative regulation of aspartic-type endopeptidase activity involved in amyloid precursor protein catabolic process	0.0128642	1
biological_process	GO:1902996	regulation of neurofibrillary tangle assembly	0.0128642	1
biological_process	GO:1903378	positive regulation of oxidative stress-induced neuron intrinsic apoptotic signaling pathway	0.0128642	1
biological_process	GO:1903383	regulation of hydrogen peroxide-induced neuron intrinsic apoptotic signaling pathway	0.0128642	1
biological_process	GO:1903384	negative regulation of hydrogen peroxide-induced neuron intrinsic apoptotic signaling pathway	0.0128642	1
biological_process	GO:1903433	regulation of constitutive secretory pathway	0.0128642	1
biological_process	GO:1903537	meiotic cell cycle process involved in oocyte maturation	0.0128642	1
biological_process	GO:1903538	regulation of meiotic cell cycle process involved in oocyte maturation	0.0128642	1
biological_process	GO:1903921	regulation of protein processing in phagocytic vesicle	0.0128642	1
biological_process	GO:1903923	positive regulation of protein processing in phagocytic vesicle	0.0128642	1
biological_process	GO:1904245	regulation of polynucleotide adenylyltransferase activity	0.0128642	1
biological_process	GO:1904881	cellular response to hydrogen sulfide	0.0128642	1
biological_process	GO:1905429	response to glycine	0.0128642	1
biological_process	GO:1905597	positive regulation of low-density lipoprotein particle receptor binding	0.0128642	1
biological_process	GO:1905599	positive regulation of low-density lipoprotein receptor activity	0.0128642	1
biological_process	GO:1990708	conditioned place preference	0.0128642	1
biological_process	GO:2000338	regulation of chemokine (C-X-C motif) ligand 1 production	0.0128642	1
biological_process	GO:2000340	positive regulation of chemokine (C-X-C motif) ligand 1 production	0.0128642	1
biological_process	GO:2000349	negative regulation of CD40 signaling pathway	0.0128642	1
biological_process	GO:2000639	negative regulation of SREBP signaling pathway	0.0128642	1
biological_process	GO:2000805	negative regulation of termination of RNA polymerase II transcription, poly(A)-coupled	0.0128642	1
biological_process	GO:2000878	positive regulation of oligopeptide transport	0.0128642	1
biological_process	GO:2000880	positive regulation of dipeptide transport	0.0128642	1
biological_process	GO:2001148	regulation of dipeptide transmembrane transport	0.0128642	1
biological_process	GO:2001150	positive regulation of dipeptide transmembrane transport	0.0128642	1
biological_process	GO:0072593	reactive oxygen species metabolic process	0.0129138	1
biological_process	GO:0000381	regulation of alternative mRNA splicing, via spliceosome	0.0129437	1
biological_process	GO:0072577	endothelial cell apoptotic process	0.0129437	1
biological_process	GO:0006002	fructose 6-phosphate metabolic process	0.0130013	1
biological_process	GO:0021612	facial nerve structural organization	0.0130013	1
biological_process	GO:0032933	SREBP signaling pathway	0.0130013	1
biological_process	GO:0042090	interleukin-12 biosynthetic process	0.0130013	1
biological_process	GO:0044341	sodium-dependent phosphate transport	0.0130013	1
biological_process	GO:0045075	regulation of interleukin-12 biosynthetic process	0.0130013	1
biological_process	GO:1902959	regulation of aspartic-type endopeptidase activity involved in amyloid precursor protein catabolic process	0.0130013	1
biological_process	GO:2000674	regulation of type B pancreatic cell apoptotic process	0.0130013	1
biological_process	GO:0021602	cranial nerve morphogenesis	0.0130411	1
biological_process	GO:0060142	regulation of syncytium formation by plasma membrane fusion	0.0130411	1
biological_process	GO:0070723	response to cholesterol	0.0130411	1
biological_process	GO:0006165	nucleoside diphosphate phosphorylation	0.0130869	1
biological_process	GO:0045598	regulation of fat cell differentiation	0.0130869	1
biological_process	GO:0008306	associative learning	0.0131456	1
biological_process	GO:0043407	negative regulation of MAP kinase activity	0.0131456	1
biological_process	GO:0015850	organic hydroxy compound transport	0.0131759	1
molecular_function	GO:0001851	complement component C3b binding	0.013243	1
molecular_function	GO:0022849	glutamate-gated calcium ion channel activity	0.013243	1
molecular_function	GO:0031698	beta-2 adrenergic receptor binding	0.013243	1
molecular_function	GO:0043426	MRF binding	0.013243	1
biological_process	GO:0090287	regulation of cellular response to growth factor stimulus	0.0133163	1
biological_process	GO:0050663	cytokine secretion	0.0133317	1
cellular_component	GO:0030016	myofibril	0.013336	1
biological_process	GO:0050764	regulation of phagocytosis	0.0133403	1
biological_process	GO:0032989	cellular component morphogenesis	0.0134054	1
molecular_function	GO:0005201	extracellular matrix structural constituent	0.0134982	1
biological_process	GO:0001885	endothelial cell development	0.013513	1
biological_process	GO:0043388	positive regulation of DNA binding	0.013513	1
molecular_function	GO:0001791	IgM binding	0.0136246	1
molecular_function	GO:0004315	3-oxoacyl-[acyl-carrier-protein] synthase activity	0.0136246	1
molecular_function	GO:0005298	proline:sodium symporter activity	0.0136246	1
molecular_function	GO:0019144	ADP-sugar diphosphatase activity	0.0136246	1
molecular_function	GO:0042008	interleukin-18 receptor activity	0.0136246	1
molecular_function	GO:0044730	bone sialoprotein binding	0.0136246	1
molecular_function	GO:0047389	glycerophosphocholine phosphodiesterase activity	0.0136246	1
molecular_function	GO:0052593	tryptamine:oxygen oxidoreductase (deaminating) activity	0.0136246	1
molecular_function	GO:0052594	aminoacetone:oxygen oxidoreductase(deaminating) activity	0.0136246	1
molecular_function	GO:0052595	aliphatic-amine oxidase activity	0.0136246	1
molecular_function	GO:0052596	phenethylamine:oxygen oxidoreductase (deaminating) activity	0.0136246	1
molecular_function	GO:0070052	collagen V binding	0.0136246	1
molecular_function	GO:0072590	N-acetyl-L-aspartate-L-glutamate ligase activity	0.0136246	1
biological_process	GO:0009259	ribonucleotide metabolic process	0.0136413	1
cellular_component	GO:0005667	transcription factor complex	0.0136438	1
biological_process	GO:0006637	acyl-CoA metabolic process	0.0136887	1
biological_process	GO:0035383	thioester metabolic process	0.0136887	1
cellular_component	GO:0002102	podosome	0.0137012	1
biological_process	GO:0043543	protein acylation	0.013867	1
cellular_component	GO:0030665	clathrin-coated vesicle membrane	0.0138742	1
biological_process	GO:0009150	purine ribonucleotide metabolic process	0.0138841	1
biological_process	GO:0032801	receptor catabolic process	0.0139421	1
biological_process	GO:0033144	negative regulation of intracellular steroid hormone receptor signaling pathway	0.0139421	1
biological_process	GO:1990748	cellular detoxification	0.0139486	1
biological_process	GO:0038066	p38MAPK cascade	0.0139732	1
biological_process	GO:0045661	regulation of myoblast differentiation	0.0139732	1
biological_process	GO:0050704	regulation of interleukin-1 secretion	0.0139732	1
biological_process	GO:0072001	renal system development	0.0141101	1
biological_process	GO:0009749	response to glucose	0.0141505	1
biological_process	GO:0048514	blood vessel morphogenesis	0.0141705	1
biological_process	GO:0008380	RNA splicing	0.0142365	1
biological_process	GO:0043370	regulation of CD4-positive, alpha-beta T cell differentiation	0.0142621	1
biological_process	GO:1903580	positive regulation of ATP metabolic process	0.0142621	1
biological_process	GO:2001239	regulation of extrinsic apoptotic signaling pathway in absence of ligand	0.0142621	1
biological_process	GO:0045616	regulation of keratinocyte differentiation	0.0142926	1
biological_process	GO:0061028	establishment of endothelial barrier	0.0142926	1
biological_process	GO:0071333	cellular response to glucose stimulus	0.0143013	1
biological_process	GO:0031329	regulation of cellular catabolic process	0.0143428	1
molecular_function	GO:0004579	dolichyl-diphosphooligosaccharide-protein glycotransferase activity	0.0143771	1
molecular_function	GO:0005131	growth hormone receptor binding	0.0143771	1
molecular_function	GO:0061575	cyclin-dependent protein serine/threonine kinase activator activity	0.0143771	1
biological_process	GO:0007611	learning or memory	0.0143855	1
biological_process	GO:0002861	regulation of inflammatory response to antigenic stimulus	0.0145053	1
biological_process	GO:0009110	vitamin biosynthetic process	0.0145053	1
biological_process	GO:0021895	cerebral cortex neuron differentiation	0.0145053	1
biological_process	GO:0031579	membrane raft organization	0.0145053	1
biological_process	GO:0051249	regulation of lymphocyte activation	0.0145295	1
molecular_function	GO:0016491	oxidoreductase activity	0.0145662	1
biological_process	GO:0002833	positive regulation of response to biotic stimulus	0.0147646	1
biological_process	GO:0070301	cellular response to hydrogen peroxide	0.0148041	1
biological_process	GO:1901570	fatty acid derivative biosynthetic process	0.0148041	1
biological_process	GO:0002703	regulation of leukocyte mediated immunity	0.0148909	1
biological_process	GO:0043009	chordate embryonic development	0.0149748	1
biological_process	GO:0010469	regulation of signaling receptor activity	0.0150542	1
biological_process	GO:0006096	glycolytic process	0.0153553	1
biological_process	GO:0043200	response to amino acid	0.0153553	1
molecular_function	GO:0043236	laminin binding	0.0153603	1
biological_process	GO:0005996	monosaccharide metabolic process	0.0153865	1
biological_process	GO:0007260	tyrosine phosphorylation of STAT protein	0.0154678	1
biological_process	GO:0048013	ephrin receptor signaling pathway	0.0154678	1
biological_process	GO:0032688	negative regulation of interferon-beta production	0.0155328	1
biological_process	GO:0032802	low-density lipoprotein particle receptor catabolic process	0.0155328	1
biological_process	GO:0045064	T-helper 2 cell differentiation	0.0155328	1
biological_process	GO:0002544	chronic inflammatory response	0.0155598	1
biological_process	GO:0032026	response to magnesium ion	0.0155598	1
biological_process	GO:0035728	response to hepatocyte growth factor	0.0155598	1
biological_process	GO:0042789	mRNA transcription by RNA polymerase II	0.0155598	1
biological_process	GO:0045063	T-helper 1 cell differentiation	0.0155598	1
biological_process	GO:0048486	parasympathetic nervous system development	0.0155598	1
biological_process	GO:0071243	cellular response to arsenic-containing substance	0.0155598	1
biological_process	GO:0071800	podosome assembly	0.0155598	1
biological_process	GO:0072576	liver morphogenesis	0.0155598	1
biological_process	GO:0044409	entry into host	0.0156037	1
biological_process	GO:0046939	nucleotide phosphorylation	0.0156037	1
cellular_component	GO:0043292	contractile fiber	0.015623	1
biological_process	GO:0007165	signal transduction	0.0156396	1
biological_process	GO:0010951	negative regulation of endopeptidase activity	0.015709	1
biological_process	GO:0030072	peptide hormone secretion	0.015709	1
biological_process	GO:0060350	endochondral bone morphogenesis	0.0157842	1
biological_process	GO:0046634	regulation of alpha-beta T cell activation	0.0159927	1
biological_process	GO:0002828	regulation of type 2 immune response	0.0160571	1
biological_process	GO:0019098	reproductive behavior	0.0160571	1
biological_process	GO:0032743	positive regulation of interleukin-2 production	0.0160571	1
biological_process	GO:0043372	positive regulation of CD4-positive, alpha-beta T cell differentiation	0.0160571	1
cellular_component	GO:0030662	coated vesicle membrane	0.016151	1
biological_process	GO:0030042	actin filament depolymerization	0.0161624	1
biological_process	GO:0071772	response to BMP	0.0162425	1
biological_process	GO:0071773	cellular response to BMP stimulus	0.0162425	1
cellular_component	GO:0012507	ER to Golgi transport vesicle membrane	0.0163065	1
biological_process	GO:0007420	brain development	0.0164987	1
cellular_component	GO:1902562	H4 histone acetyltransferase complex	0.0165781	1
biological_process	GO:0050731	positive regulation of peptidyl-tyrosine phosphorylation	0.0166085	1
biological_process	GO:0001774	microglial cell activation	0.0166575	1
biological_process	GO:0002269	leukocyte activation involved in inflammatory response	0.0166575	1
biological_process	GO:0007595	lactation	0.0166575	1
biological_process	GO:0055010	ventricular cardiac muscle tissue morphogenesis	0.0166575	1
biological_process	GO:0072604	interleukin-6 secretion	0.0166575	1
cellular_component	GO:0099055	integral component of postsynaptic membrane	0.016693	1
biological_process	GO:0097242	amyloid-beta clearance	0.0167663	1
biological_process	GO:1901099	negative regulation of signal transduction in absence of ligand	0.0167663	1
biological_process	GO:2000516	positive regulation of CD4-positive, alpha-beta T cell activation	0.0167663	1
biological_process	GO:2001240	negative regulation of extrinsic apoptotic signaling pathway in absence of ligand	0.0167663	1
biological_process	GO:0030858	positive regulation of epithelial cell differentiation	0.0167687	1
biological_process	GO:0002706	regulation of lymphocyte mediated immunity	0.0168049	1
biological_process	GO:0051251	positive regulation of lymphocyte activation	0.0168243	1
biological_process	GO:0006757	ATP generation from ADP	0.0168714	1
biological_process	GO:0051154	negative regulation of striated muscle cell differentiation	0.0169029	1
biological_process	GO:1903146	regulation of autophagy of mitochondrion	0.0169029	1
biological_process	GO:0002696	positive regulation of leukocyte activation	0.0169173	1
biological_process	GO:1902275	regulation of chromatin organization	0.0169226	1
biological_process	GO:0072006	nephron development	0.0169239	1
biological_process	GO:0120039	plasma membrane bounded cell projection morphogenesis	0.0169413	1
biological_process	GO:0001704	formation of primary germ layer	0.0169814	1
biological_process	GO:0046718	viral entry into host cell	0.0169814	1
biological_process	GO:0070663	regulation of leukocyte proliferation	0.0173973	1
molecular_function	GO:0045028	G protein-coupled purinergic nucleotide receptor activity	0.0174603	1
molecular_function	GO:0046935	1-phosphatidylinositol-3-kinase regulator activity	0.0174603	1
biological_process	GO:0010634	positive regulation of epithelial cell migration	0.0175045	1
biological_process	GO:0034762	regulation of transmembrane transport	0.0176267	1
biological_process	GO:0030855	epithelial cell differentiation	0.0176511	1
biological_process	GO:0050701	interleukin-1 secretion	0.0177219	1
cellular_component	GO:0071682	endocytic vesicle lumen	0.0177226	1
biological_process	GO:0045621	positive regulation of lymphocyte differentiation	0.0177465	1
molecular_function	GO:0070577	lysine-acetylated histone binding	0.0177706	1
molecular_function	GO:0140033	acetylation-dependent protein binding	0.0177706	1
biological_process	GO:0031670	cellular response to nutrient	0.0177825	1
cellular_component	GO:0043256	laminin complex	0.017942	1
cellular_component	GO:0072588	box H/ACA RNP complex	0.017942	1
cellular_component	GO:0098981	cholinergic synapse	0.017942	1
biological_process	GO:0043271	negative regulation of ion transport	0.0179993	1
biological_process	GO:0009743	response to carbohydrate	0.018083	1
biological_process	GO:1903426	regulation of reactive oxygen species biosynthetic process	0.0181074	1
biological_process	GO:0001562	response to protozoan	0.0182195	1
biological_process	GO:0002335	mature B cell differentiation	0.0182195	1
biological_process	GO:2000311	regulation of AMPA receptor activity	0.0182195	1
biological_process	GO:0050670	regulation of lymphocyte proliferation	0.0182462	1
biological_process	GO:0008285	negative regulation of cell population proliferation	0.0182846	1
biological_process	GO:0043270	positive regulation of ion transport	0.0183025	1
biological_process	GO:0010506	regulation of autophagy	0.0183055	1
biological_process	GO:0071156	regulation of cell cycle arrest	0.0183539	1
biological_process	GO:0031056	regulation of histone modification	0.018368	1
biological_process	GO:0009185	ribonucleoside diphosphate metabolic process	0.0184894	1
biological_process	GO:0016999	antibiotic metabolic process	0.0185665	1
biological_process	GO:0022617	extracellular matrix disassembly	0.0185812	1
biological_process	GO:1903533	regulation of protein targeting	0.0185812	1
biological_process	GO:0032613	interleukin-10 production	0.0186005	1
biological_process	GO:0032874	positive regulation of stress-activated MAPK cascade	0.0188432	1
biological_process	GO:0022898	regulation of transmembrane transporter activity	0.0188522	1
cellular_component	GO:0005662	DNA replication factor A complex	0.018919	1
cellular_component	GO:0070382	exocytic vesicle	0.0192247	1
biological_process	GO:0002704	negative regulation of leukocyte mediated immunity	0.0193409	1
biological_process	GO:0043124	negative regulation of I-kappaB kinase/NF-kappaB signaling	0.0193409	1
cellular_component	GO:0030669	clathrin-coated endocytic vesicle membrane	0.019393	1
biological_process	GO:0110053	regulation of actin filament organization	0.0194136	1
biological_process	GO:0071229	cellular response to acid chemical	0.0194899	1
biological_process	GO:0009416	response to light stimulus	0.0195225	1
biological_process	GO:0030431	sleep	0.0195458	1
biological_process	GO:0043457	regulation of cellular respiration	0.0195458	1
biological_process	GO:0045737	positive regulation of cyclin-dependent protein serine/threonine kinase activity	0.0195458	1
biological_process	GO:0051482	positive regulation of cytosolic calcium ion concentration involved in phospholipase C-activating G protein-coupled signaling pathway	0.0195458	1
biological_process	GO:1902895	positive regulation of pri-miRNA transcription by RNA polymerase II	0.0195458	1
biological_process	GO:0048589	developmental growth	0.0196022	1
biological_process	GO:0042102	positive regulation of T cell proliferation	0.0196455	1
biological_process	GO:0055088	lipid homeostasis	0.0196898	1
biological_process	GO:0001660	fever generation	0.0197476	1
biological_process	GO:0007191	adenylate cyclase-activating dopamine receptor signaling pathway	0.0197476	1
biological_process	GO:0035090	maintenance of apical/basal cell polarity	0.0197476	1
biological_process	GO:0035672	oligopeptide transmembrane transport	0.0197476	1
biological_process	GO:0036500	ATF6-mediated unfolded protein response	0.0197476	1
biological_process	GO:0042428	serotonin metabolic process	0.0197476	1
biological_process	GO:0045199	maintenance of epithelial cell apical/basal polarity	0.0197476	1
biological_process	GO:0048102	autophagic cell death	0.0197476	1
biological_process	GO:0048570	notochord morphogenesis	0.0197476	1
biological_process	GO:0051014	actin filament severing	0.0197476	1
biological_process	GO:0051133	regulation of NK T cell activation	0.0197476	1
biological_process	GO:0051956	negative regulation of amino acid transport	0.0197476	1
biological_process	GO:0070816	phosphorylation of RNA polymerase II C-terminal domain	0.0197476	1
biological_process	GO:0071501	cellular response to sterol depletion	0.0197476	1
biological_process	GO:0072610	interleukin-12 secretion	0.0197476	1
biological_process	GO:0097050	type B pancreatic cell apoptotic process	0.0197476	1
biological_process	GO:1900122	positive regulation of receptor binding	0.0197476	1
biological_process	GO:1902237	positive regulation of endoplasmic reticulum stress-induced intrinsic apoptotic signaling pathway	0.0197476	1
biological_process	GO:1903862	positive regulation of oxidative phosphorylation	0.0197476	1
biological_process	GO:2000665	regulation of interleukin-13 secretion	0.0197476	1
biological_process	GO:0045429	positive regulation of nitric oxide biosynthetic process	0.0198491	1
biological_process	GO:0051293	establishment of spindle localization	0.0198491	1
cellular_component	GO:0098552	side of membrane	0.019881	1
cellular_component	GO:0015030	Cajal body	0.0198856	1
biological_process	GO:0060562	epithelial tube morphogenesis	0.0199177	1
biological_process	GO:0033002	muscle cell proliferation	0.0199245	1
biological_process	GO:2000116	regulation of cysteine-type endopeptidase activity	0.0199245	1
biological_process	GO:1900026	positive regulation of substrate adhesion-dependent cell spreading	0.0199864	1
biological_process	GO:0016137	glycoside metabolic process	0.0201416	1
biological_process	GO:0030220	platelet formation	0.0201416	1
biological_process	GO:0030903	notochord development	0.0201416	1
biological_process	GO:0043369	CD4-positive or CD8-positive, alpha-beta T cell lineage commitment	0.0201416	1
biological_process	GO:0043371	negative regulation of CD4-positive, alpha-beta T cell differentiation	0.0201416	1
biological_process	GO:0051580	regulation of neurotransmitter uptake	0.0201416	1
biological_process	GO:0060602	branch elongation of an epithelium	0.0201416	1
biological_process	GO:1901881	positive regulation of protein depolymerization	0.0201416	1
biological_process	GO:1905523	positive regulation of macrophage migration	0.0201416	1
biological_process	GO:0010830	regulation of myotube differentiation	0.0201651	1
biological_process	GO:0032835	glomerulus development	0.0201651	1
biological_process	GO:0032922	circadian regulation of gene expression	0.0201651	1
biological_process	GO:0003231	cardiac ventricle development	0.0202037	1
biological_process	GO:0002220	innate immune response activating cell surface receptor signaling pathway	0.0202534	1
biological_process	GO:0070304	positive regulation of stress-activated protein kinase signaling cascade	0.0202616	1
biological_process	GO:0000086	G2/M transition of mitotic cell cycle	0.0205704	1
biological_process	GO:0043687	post-translational protein modification	0.0206255	1
biological_process	GO:0002764	immune response-regulating signaling pathway	0.0206984	1
cellular_component	GO:0044300	cerebellar mossy fiber	0.0207342	1
biological_process	GO:0002697	regulation of immune effector process	0.0207422	1
biological_process	GO:0017144	drug metabolic process	0.0207697	1
biological_process	GO:0070372	regulation of ERK1 and ERK2 cascade	0.020813	1
biological_process	GO:0051604	protein maturation	0.0210015	1
biological_process	GO:0002831	regulation of response to biotic stimulus	0.021005	1
biological_process	GO:0001649	osteoblast differentiation	0.0210408	1
molecular_function	GO:0045503	dynein light chain binding	0.0210722	1
biological_process	GO:0009109	coenzyme catabolic process	0.0211642	1
biological_process	GO:0010759	positive regulation of macrophage chemotaxis	0.0211642	1
biological_process	GO:0015936	coenzyme A metabolic process	0.0211642	1
biological_process	GO:0018158	protein oxidation	0.0211642	1
biological_process	GO:0042976	activation of Janus kinase activity	0.0211642	1
biological_process	GO:0043518	negative regulation of DNA damage response, signal transduction by p53 class mediator	0.0211642	1
biological_process	GO:0045073	regulation of chemokine biosynthetic process	0.0211642	1
biological_process	GO:0090197	positive regulation of chemokine secretion	0.0211642	1
biological_process	GO:1900037	regulation of cellular response to hypoxia	0.0211642	1
biological_process	GO:0006732	coenzyme metabolic process	0.0211896	1
biological_process	GO:0046427	positive regulation of receptor signaling pathway via JAK-STAT	0.021297	1
biological_process	GO:0055008	cardiac muscle tissue morphogenesis	0.0213999	1
biological_process	GO:0042632	cholesterol homeostasis	0.0216969	1
biological_process	GO:1990823	response to leukemia inhibitory factor	0.0216969	1
biological_process	GO:1990830	cellular response to leukemia inhibitory factor	0.0216969	1
molecular_function	GO:0002162	dystroglycan binding	0.0217771	1
molecular_function	GO:0004576	oligosaccharyl transferase activity	0.0217771	1
molecular_function	GO:0005436	sodium:phosphate symporter activity	0.0217771	1
molecular_function	GO:0046790	virion binding	0.0217771	1
biological_process	GO:0010389	regulation of G2/M transition of mitotic cell cycle	0.0218361	1
biological_process	GO:0032535	regulation of cellular component size	0.0219483	1
biological_process	GO:0018958	phenol-containing compound metabolic process	0.0219552	1
biological_process	GO:0035601	protein deacylation	0.0219552	1
biological_process	GO:0032946	positive regulation of mononuclear cell proliferation	0.02196	1
biological_process	GO:0014013	regulation of gliogenesis	0.0220812	1
biological_process	GO:0002758	innate immune response-activating signal transduction	0.0221302	1
biological_process	GO:0033209	tumor necrosis factor-mediated signaling pathway	0.0221816	1
biological_process	GO:0009314	response to radiation	0.0222477	1
cellular_component	GO:0042470	melanosome	0.0223228	1
cellular_component	GO:0048770	pigment granule	0.0223228	1
biological_process	GO:0001706	endoderm formation	0.0223308	1
cellular_component	GO:0098978	glutamatergic synapse	0.0223382	1
biological_process	GO:0000380	alternative mRNA splicing, via spliceosome	0.0223519	1
biological_process	GO:0000422	autophagy of mitochondrion	0.0223519	1
biological_process	GO:0042310	vasoconstriction	0.0223519	1
biological_process	GO:0061726	mitochondrion disassembly	0.0223519	1
biological_process	GO:0016255	attachment of GPI anchor to protein	0.0223808	1
biological_process	GO:0019401	alditol biosynthetic process	0.0223808	1
biological_process	GO:0038145	macrophage colony-stimulating factor signaling pathway	0.0223808	1
biological_process	GO:0042091	interleukin-10 biosynthetic process	0.0223808	1
biological_process	GO:0045074	regulation of interleukin-10 biosynthetic process	0.0223808	1
biological_process	GO:0046543	development of secondary female sexual characteristics	0.0223808	1
biological_process	GO:0046958	nonassociative learning	0.0223808	1
biological_process	GO:0052405	negative regulation by host of symbiont molecular function	0.0223808	1
biological_process	GO:0055009	atrial cardiac muscle tissue morphogenesis	0.0223808	1
biological_process	GO:0060526	prostate glandular acinus morphogenesis	0.0223808	1
biological_process	GO:0060527	prostate epithelial cord arborization involved in prostate glandular acinus morphogenesis	0.0223808	1
biological_process	GO:0060842	arterial endothelial cell differentiation	0.0223808	1
biological_process	GO:0072126	positive regulation of glomerular mesangial cell proliferation	0.0223808	1
biological_process	GO:0072679	thymocyte migration	0.0223808	1
biological_process	GO:1902177	positive regulation of oxidative stress-induced intrinsic apoptotic signaling pathway	0.0223808	1
biological_process	GO:1903121	regulation of TRAIL-activated apoptotic signaling pathway	0.0223808	1
biological_process	GO:1904783	positive regulation of NMDA glutamate receptor activity	0.0223808	1
biological_process	GO:2000348	regulation of CD40 signaling pathway	0.0223808	1
biological_process	GO:2000675	negative regulation of type B pancreatic cell apoptotic process	0.0223808	1
cellular_component	GO:0000123	histone acetyltransferase complex	0.0224502	1
biological_process	GO:0010758	regulation of macrophage chemotaxis	0.0225533	1
biological_process	GO:0060669	embryonic placenta morphogenesis	0.0225533	1
biological_process	GO:0060706	cell differentiation involved in embryonic placenta development	0.0225533	1
biological_process	GO:0071711	basement membrane organization	0.0225533	1
biological_process	GO:0097066	response to thyroid hormone	0.0225533	1
biological_process	GO:1900120	regulation of receptor binding	0.0225533	1
biological_process	GO:1903203	regulation of oxidative stress-induced neuron death	0.0225533	1
cellular_component	GO:0035577	azurophil granule membrane	0.0226798	1
biological_process	GO:0070371	ERK1 and ERK2 cascade	0.0228166	1
biological_process	GO:0046637	regulation of alpha-beta T cell differentiation	0.0228519	1
biological_process	GO:0043401	steroid hormone mediated signaling pathway	0.0228546	1
molecular_function	GO:0005164	tumor necrosis factor receptor binding	0.0228855	1
molecular_function	GO:0042288	MHC class I protein binding	0.022937	1
biological_process	GO:0042133	neurotransmitter metabolic process	0.0229497	1
biological_process	GO:0007584	response to nutrient	0.0230021	1
biological_process	GO:0006970	response to osmotic stress	0.0230635	1
biological_process	GO:0045582	positive regulation of T cell differentiation	0.0230635	1
biological_process	GO:2000106	regulation of leukocyte apoptotic process	0.0230635	1
biological_process	GO:0035307	positive regulation of protein dephosphorylation	0.0231535	1
biological_process	GO:0042987	amyloid precursor protein catabolic process	0.0231535	1
biological_process	GO:0061756	leukocyte adhesion to vascular endothelial cell	0.0231535	1
biological_process	GO:1904407	positive regulation of nitric oxide metabolic process	0.0231535	1
biological_process	GO:0002695	negative regulation of leukocyte activation	0.0233498	1
biological_process	GO:0046685	response to arsenic-containing substance	0.0235419	1
biological_process	GO:0046949	fatty-acyl-CoA biosynthetic process	0.0235419	1
biological_process	GO:1901661	quinone metabolic process	0.0235419	1
biological_process	GO:1902235	regulation of endoplasmic reticulum stress-induced intrinsic apoptotic signaling pathway	0.0235419	1
biological_process	GO:2000778	positive regulation of interleukin-6 secretion	0.0235419	1
biological_process	GO:0001656	metanephros development	0.0235716	1
biological_process	GO:0045580	regulation of T cell differentiation	0.0235844	1
biological_process	GO:0060416	response to growth hormone	0.0236297	1
biological_process	GO:1904037	positive regulation of epithelial cell apoptotic process	0.0236297	1
molecular_function	GO:0000900	translation repressor activity, mRNA regulatory element binding	0.0237231	1
molecular_function	GO:0001222	transcription corepressor binding	0.0237231	1
molecular_function	GO:0019215	intermediate filament binding	0.0237231	1
molecular_function	GO:0042809	vitamin D receptor binding	0.0237231	1
biological_process	GO:0033673	negative regulation of kinase activity	0.0237683	1
biological_process	GO:0050803	regulation of synapse structure or activity	0.0237889	1
biological_process	GO:0055092	sterol homeostasis	0.0239079	1
cellular_component	GO:0032281	AMPA glutamate receptor complex	0.0240005	1
biological_process	GO:0048666	neuron development	0.0240154	1
biological_process	GO:0045471	response to ethanol	0.0240209	1
biological_process	GO:0002709	regulation of T cell mediated immunity	0.0240468	1
biological_process	GO:0034121	regulation of toll-like receptor signaling pathway	0.0240468	1
biological_process	GO:0051966	regulation of synaptic transmission, glutamatergic	0.0240468	1
biological_process	GO:1903532	positive regulation of secretion by cell	0.0240667	1
biological_process	GO:0071887	leukocyte apoptotic process	0.0240997	1
biological_process	GO:0098732	macromolecule deacylation	0.0240997	1
biological_process	GO:0048812	neuron projection morphogenesis	0.0241886	1
molecular_function	GO:0003988	acetyl-CoA C-acyltransferase activity	0.0241995	1
molecular_function	GO:0004064	arylesterase activity	0.0241995	1
molecular_function	GO:0004704	NF-kappaB-inducing kinase activity	0.0241995	1
molecular_function	GO:0043878	glyceraldehyde-3-phosphate dehydrogenase (NAD+) (non-phosphorylating) activity	0.0241995	1
biological_process	GO:0030100	regulation of endocytosis	0.024261	1
biological_process	GO:0072522	purine-containing compound biosynthetic process	0.024261	1
cellular_component	GO:0042383	sarcolemma	0.0245364	1
biological_process	GO:0006469	negative regulation of protein kinase activity	0.02454	1
biological_process	GO:1902532	negative regulation of intracellular signal transduction	0.0246371	1
biological_process	GO:0032970	regulation of actin filament-based process	0.0246677	1
biological_process	GO:0019725	cellular homeostasis	0.024712	1
cellular_component	GO:0030134	COPII-coated ER to Golgi transport vesicle	0.0248392	1
biological_process	GO:1901224	positive regulation of NIK/NF-kappaB signaling	0.0249433	1
biological_process	GO:0072359	circulatory system development	0.0250028	1
biological_process	GO:0033036	macromolecule localization	0.0250183	1
biological_process	GO:0032501	multicellular organismal process	0.0251503	1
biological_process	GO:0002768	immune response-regulating cell surface receptor signaling pathway	0.0251714	1
biological_process	GO:0033865	nucleoside bisphosphate metabolic process	0.0255041	1
biological_process	GO:0033875	ribonucleoside bisphosphate metabolic process	0.0255041	1
biological_process	GO:0034032	purine nucleoside bisphosphate metabolic process	0.0255041	1
biological_process	GO:0002438	acute inflammatory response to antigenic stimulus	0.0255588	1
biological_process	GO:0006067	ethanol metabolic process	0.0255588	1
biological_process	GO:0006907	pinocytosis	0.0255588	1
biological_process	GO:0030728	ovulation	0.0255588	1
biological_process	GO:0032332	positive regulation of chondrocyte differentiation	0.0255588	1
biological_process	GO:0035357	peroxisome proliferator activated receptor signaling pathway	0.0255588	1
biological_process	GO:0036344	platelet morphogenesis	0.0255588	1
biological_process	GO:0042403	thyroid hormone metabolic process	0.0255588	1
biological_process	GO:0043153	entrainment of circadian clock by photoperiod	0.0255588	1
biological_process	GO:2001014	regulation of skeletal muscle cell differentiation	0.0255588	1
biological_process	GO:0045619	regulation of lymphocyte differentiation	0.0255734	1
biological_process	GO:0030834	regulation of actin filament depolymerization	0.0256453	1
biological_process	GO:0051496	positive regulation of stress fiber assembly	0.0256453	1
biological_process	GO:0097366	response to bronchodilator	0.0256453	1
cellular_component	GO:0098936	intrinsic component of postsynaptic membrane	0.0257093	1
biological_process	GO:0043297	apical junction assembly	0.0257954	1
biological_process	GO:0045669	positive regulation of osteoblast differentiation	0.0257954	1
biological_process	GO:0046579	positive regulation of Ras protein signal transduction	0.0257954	1
biological_process	GO:1901607	alpha-amino acid biosynthetic process	0.0257954	1
biological_process	GO:0045787	positive regulation of cell cycle	0.0258092	1
biological_process	GO:0034765	regulation of ion transmembrane transport	0.0258458	1
molecular_function	GO:0004435	phosphatidylinositol phospholipase C activity	0.0260085	1
molecular_function	GO:0016628	oxidoreductase activity, acting on the CH-CH group of donors, NAD or NADP as acceptor	0.0260085	1
molecular_function	GO:0016684	oxidoreductase activity, acting on peroxide as acceptor	0.0260665	1
biological_process	GO:0032479	regulation of type I interferon production	0.0260887	1
biological_process	GO:0071900	regulation of protein serine/threonine kinase activity	0.0262762	1
biological_process	GO:0048024	regulation of mRNA splicing, via spliceosome	0.0262856	1
biological_process	GO:0045596	negative regulation of cell differentiation	0.0263456	1
biological_process	GO:0006109	regulation of carbohydrate metabolic process	0.0265461	1
biological_process	GO:0050866	negative regulation of cell activation	0.0265461	1
biological_process	GO:0031334	positive regulation of protein-containing complex assembly	0.0267505	1
biological_process	GO:0001974	blood vessel remodeling	0.0268375	1
biological_process	GO:0002820	negative regulation of adaptive immune response	0.0268375	1
biological_process	GO:0035987	endodermal cell differentiation	0.0268375	1
biological_process	GO:0014706	striated muscle tissue development	0.0269924	1
biological_process	GO:1901565	organonitrogen compound catabolic process	0.0271921	1
biological_process	GO:0006164	purine nucleotide biosynthetic process	0.0272494	1
molecular_function	GO:0072341	modified amino acid binding	0.0273098	1
biological_process	GO:0036475	neuron death in response to oxidative stress	0.0275494	1
biological_process	GO:0046885	regulation of hormone biosynthetic process	0.0275494	1
biological_process	GO:1902175	regulation of oxidative stress-induced intrinsic apoptotic signaling pathway	0.0275494	1
biological_process	GO:0061900	glial cell activation	0.0275647	1
biological_process	GO:0032872	regulation of stress-activated MAPK cascade	0.0275814	1
biological_process	GO:0072330	monocarboxylic acid biosynthetic process	0.0275814	1
biological_process	GO:0072595	maintenance of protein localization in organelle	0.0277223	1
biological_process	GO:0007568	aging	0.0278819	1
molecular_function	GO:0043531	ADP binding	0.0279191	1
biological_process	GO:0009135	purine nucleoside diphosphate metabolic process	0.0279431	1
biological_process	GO:0009179	purine ribonucleoside diphosphate metabolic process	0.0279431	1
biological_process	GO:0007369	gastrulation	0.0279539	1
biological_process	GO:0046328	regulation of JNK cascade	0.0279539	1
biological_process	GO:0002295	T-helper cell lineage commitment	0.0279736	1
biological_process	GO:0031958	corticosteroid receptor signaling pathway	0.0279736	1
biological_process	GO:0034975	protein folding in endoplasmic reticulum	0.0279736	1
biological_process	GO:0042033	chemokine biosynthetic process	0.0279736	1
biological_process	GO:0042447	hormone catabolic process	0.0279736	1
biological_process	GO:0043031	negative regulation of macrophage activation	0.0279736	1
biological_process	GO:0050755	chemokine metabolic process	0.0279736	1
biological_process	GO:0090493	catecholamine uptake	0.0279736	1
biological_process	GO:1900451	positive regulation of glutamate receptor signaling pathway	0.0279736	1
biological_process	GO:1990000	amyloid fibril formation	0.0279736	1
biological_process	GO:0014072	response to isoquinoline alkaloid	0.0280779	1
biological_process	GO:0018279	protein N-linked glycosylation via asparagine	0.0280779	1
biological_process	GO:0043278	response to morphine	0.0280779	1
biological_process	GO:0048011	neurotrophin TRK receptor signaling pathway	0.0280779	1
biological_process	GO:0032412	regulation of ion transmembrane transporter activity	0.0280943	1
biological_process	GO:0000185	activation of MAPKKK activity	0.0282933	1
biological_process	GO:0002887	negative regulation of myeloid leukocyte mediated immunity	0.0282933	1
biological_process	GO:0019042	viral latency	0.0282933	1
biological_process	GO:0021561	facial nerve development	0.0282933	1
biological_process	GO:0021604	cranial nerve structural organization	0.0282933	1
biological_process	GO:0021610	facial nerve morphogenesis	0.0282933	1
biological_process	GO:0021892	cerebral cortex GABAergic interneuron differentiation	0.0282933	1
biological_process	GO:0045351	type I interferon biosynthetic process	0.0282933	1
biological_process	GO:0046185	aldehyde catabolic process	0.0282933	1
biological_process	GO:0051583	dopamine uptake involved in synaptic transmission	0.0282933	1
biological_process	GO:0051934	catecholamine uptake involved in synaptic transmission	0.0282933	1
biological_process	GO:0072584	caveolin-mediated endocytosis	0.0282933	1
biological_process	GO:0072611	interleukin-13 secretion	0.0282933	1
biological_process	GO:0090193	positive regulation of glomerulus development	0.0282933	1
biological_process	GO:1902065	response to L-glutamate	0.0282933	1
biological_process	GO:1905245	regulation of aspartic-type peptidase activity	0.0282933	1
biological_process	GO:1990440	positive regulation of transcription from RNA polymerase II promoter in response to endoplasmic reticulum stress	0.0282933	1
biological_process	GO:2000318	positive regulation of T-helper 17 type immune response	0.0282933	1
biological_process	GO:2000551	regulation of T-helper 2 cell cytokine production	0.0282933	1
biological_process	GO:0048864	stem cell development	0.028316	1
biological_process	GO:0042129	regulation of T cell proliferation	0.0286076	1
cellular_component	GO:0098576	lumenal side of membrane	0.0286318	1
biological_process	GO:1904894	positive regulation of receptor signaling pathway via STAT	0.0286653	1
biological_process	GO:0002223	stimulatory C-type lectin receptor signaling pathway	0.0287654	1
biological_process	GO:0006996	organelle organization	0.0288163	1
biological_process	GO:0034340	response to type I interferon	0.0288371	1
biological_process	GO:0051817	modulation of process of other organism involved in symbiotic interaction	0.0288371	1
biological_process	GO:0007041	lysosomal transport	0.0288619	1
biological_process	GO:2001023	regulation of response to drug	0.0288619	1
biological_process	GO:0002548	monocyte chemotaxis	0.0290083	1
biological_process	GO:0050854	regulation of antigen receptor-mediated signaling pathway	0.0290083	1
biological_process	GO:0009267	cellular response to starvation	0.0291706	1
biological_process	GO:0051048	negative regulation of secretion	0.0292084	1
biological_process	GO:0031175	neuron projection development	0.0292485	1
cellular_component	GO:0098852	lytic vacuole membrane	0.0295647	1
cellular_component	GO:0008021	synaptic vesicle	0.0295649	1
cellular_component	GO:0031252	cell leading edge	0.0295905	1
biological_process	GO:0051091	positive regulation of DNA-binding transcription factor activity	0.0296654	1
biological_process	GO:0002218	activation of innate immune response	0.0297012	1
molecular_function	GO:0050662	coenzyme binding	0.0298185	1
cellular_component	GO:0031248	protein acetyltransferase complex	0.0299648	1
cellular_component	GO:0043202	lysosomal lumen	0.0299648	1
cellular_component	GO:1902493	acetyltransferase complex	0.0299648	1
biological_process	GO:0061035	regulation of cartilage development	0.0300596	1
cellular_component	GO:0005811	lipid droplet	0.0303057	1
biological_process	GO:0006325	chromatin organization	0.0303457	1
biological_process	GO:0048771	tissue remodeling	0.0306173	1
biological_process	GO:1903034	regulation of response to wounding	0.0306173	1
biological_process	GO:0032606	type I interferon production	0.0306285	1
biological_process	GO:0034763	negative regulation of transmembrane transport	0.0306285	1
biological_process	GO:0051924	regulation of calcium ion transport	0.0306433	1
biological_process	GO:0060322	head development	0.0306503	1
biological_process	GO:0030509	BMP signaling pathway	0.030713	1
biological_process	GO:0021675	nerve development	0.0307885	1
biological_process	GO:0042590	antigen processing and presentation of exogenous peptide antigen via MHC class I	0.0307885	1
biological_process	GO:0045913	positive regulation of carbohydrate metabolic process	0.0307885	1
biological_process	GO:0071260	cellular response to mechanical stimulus	0.0307885	1
biological_process	GO:0048705	skeletal system morphogenesis	0.0309089	1
biological_process	GO:0070302	regulation of stress-activated protein kinase signaling cascade	0.0309089	1
biological_process	GO:0002673	regulation of acute inflammatory response	0.0309213	1
biological_process	GO:0043277	apoptotic cell clearance	0.0309213	1
biological_process	GO:0050706	regulation of interleukin-1 beta secretion	0.0309213	1
biological_process	GO:0016043	cellular component organization	0.0309679	1
biological_process	GO:1903578	regulation of ATP metabolic process	0.031002	1
biological_process	GO:0031331	positive regulation of cellular catabolic process	0.0310739	1
molecular_function	GO:0004312	fatty acid synthase activity	0.0311159	1
molecular_function	GO:0048407	platelet-derived growth factor binding	0.0311159	1
biological_process	GO:0071214	cellular response to abiotic stimulus	0.0311261	1
biological_process	GO:0104004	cellular response to environmental stimulus	0.0311261	1
biological_process	GO:0033619	membrane protein proteolysis	0.0311524	1
biological_process	GO:2000756	regulation of peptidyl-lysine acetylation	0.0311524	1
biological_process	GO:0051093	negative regulation of developmental process	0.0312291	1
biological_process	GO:0008625	extrinsic apoptotic signaling pathway via death domain receptors	0.0312528	1
biological_process	GO:0030101	natural killer cell activation	0.0312528	1
biological_process	GO:0042446	hormone biosynthetic process	0.0312528	1
biological_process	GO:0034329	cell junction assembly	0.0312562	1
molecular_function	GO:0030169	low-density lipoprotein particle binding	0.0312679	1
molecular_function	GO:0035259	glucocorticoid receptor binding	0.0312679	1
molecular_function	GO:0050780	dopamine receptor binding	0.0312679	1
biological_process	GO:0010466	negative regulation of peptidase activity	0.0313041	1
biological_process	GO:0034504	protein localization to nucleus	0.0313041	1
biological_process	GO:0046883	regulation of hormone secretion	0.0313041	1
biological_process	GO:0051348	negative regulation of transferase activity	0.0314385	1
biological_process	GO:0051341	regulation of oxidoreductase activity	0.0314923	1
biological_process	GO:0006476	protein deacetylation	0.0315	1
biological_process	GO:0033273	response to vitamin	0.0315	1
biological_process	GO:1901655	cellular response to ketone	0.0315	1
biological_process	GO:0009896	positive regulation of catabolic process	0.0316512	1
cellular_component	GO:0045335	phagocytic vesicle	0.0317556	1
biological_process	GO:0006085	acetyl-CoA biosynthetic process	0.0318637	1
biological_process	GO:0045624	positive regulation of T-helper cell differentiation	0.0318637	1
biological_process	GO:0046058	cAMP metabolic process	0.0318637	1
biological_process	GO:0071404	cellular response to low-density lipoprotein particle stimulus	0.0318637	1
biological_process	GO:1901984	negative regulation of protein acetylation	0.0318637	1
biological_process	GO:0035296	regulation of tube diameter	0.0319869	1
biological_process	GO:0097746	regulation of blood vessel diameter	0.0319869	1
biological_process	GO:0043393	regulation of protein binding	0.0320273	1
biological_process	GO:0002823	negative regulation of adaptive immune response based on somatic recombination of immune receptors built from immunoglobulin superfamily domains	0.0322882	1
biological_process	GO:0014046	dopamine secretion	0.0322882	1
biological_process	GO:0014059	regulation of dopamine secretion	0.0322882	1
biological_process	GO:0050832	defense response to fungus	0.0322882	1
cellular_component	GO:0031143	pseudopodium	0.0323737	1
cellular_component	GO:0097440	apical dendrite	0.0323737	1
biological_process	GO:0045428	regulation of nitric oxide biosynthetic process	0.0325029	1
biological_process	GO:0001822	kidney development	0.0325195	1
cellular_component	GO:0101003	ficolin-1-rich granule membrane	0.0326196	1
cellular_component	GO:0005789	endoplasmic reticulum membrane	0.0326281	1
biological_process	GO:0015980	energy derivation by oxidation of organic compounds	0.0330769	1
biological_process	GO:0050673	epithelial cell proliferation	0.0331548	1
biological_process	GO:0006099	tricarboxylic acid cycle	0.0331833	1
biological_process	GO:0010574	regulation of vascular endothelial growth factor production	0.0331833	1
biological_process	GO:0018196	peptidyl-asparagine modification	0.0331833	1
biological_process	GO:0045920	negative regulation of exocytosis	0.0331833	1
biological_process	GO:0001773	myeloid dendritic cell activation	0.0332456	1
biological_process	GO:0001958	endochondral ossification	0.0332456	1
biological_process	GO:0033137	negative regulation of peptidyl-serine phosphorylation	0.0332456	1
biological_process	GO:0036075	replacement ossification	0.0332456	1
biological_process	GO:0042730	fibrinolysis	0.0332456	1
biological_process	GO:0051647	nucleus localization	0.0332456	1
biological_process	GO:0095500	acetylcholine receptor signaling pathway	0.0332456	1
biological_process	GO:2000108	positive regulation of leukocyte apoptotic process	0.0332456	1
biological_process	GO:0035065	regulation of histone acetylation	0.0333162	1
biological_process	GO:0050702	interleukin-1 beta secretion	0.0333162	1
cellular_component	GO:0042587	glycogen granule	0.0333413	1
biological_process	GO:0003208	cardiac ventricle morphogenesis	0.0334469	1
biological_process	GO:1903524	positive regulation of blood circulation	0.0334469	1
molecular_function	GO:0016627	oxidoreductase activity, acting on the CH-CH group of donors	0.0335253	1
biological_process	GO:0003018	vascular process in circulatory system	0.0335475	1
biological_process	GO:1905477	positive regulation of protein localization to membrane	0.0335876	1
biological_process	GO:0048878	chemical homeostasis	0.0336495	1
biological_process	GO:0007049	cell cycle	0.0337064	1
cellular_component	GO:0005606	laminin-1 complex	0.0338092	1
cellular_component	GO:0005896	interleukin-6 receptor complex	0.0338092	1
cellular_component	GO:0005944	phosphatidylinositol 3-kinase complex, class IB	0.0338092	1
cellular_component	GO:0005945	6-phosphofructokinase complex	0.0338092	1
cellular_component	GO:0020016	ciliary pocket	0.0338092	1
cellular_component	GO:0020018	ciliary pocket membrane	0.0338092	1
cellular_component	GO:0031523	Myb complex	0.0338092	1
cellular_component	GO:0032937	SREBP-SCAP-Insig complex	0.0338092	1
cellular_component	GO:0043259	laminin-10 complex	0.0338092	1
cellular_component	GO:0043260	laminin-11 complex	0.0338092	1
cellular_component	GO:0045092	interleukin-18 receptor complex	0.0338092	1
cellular_component	GO:0070743	interleukin-23 complex	0.0338092	1
cellular_component	GO:0097454	Schwann cell microvillus	0.0338092	1
biological_process	GO:0071248	cellular response to metal ion	0.0338893	1
biological_process	GO:0032271	regulation of protein polymerization	0.0339526	1
biological_process	GO:1900542	regulation of purine nucleotide metabolic process	0.0339894	1
biological_process	GO:0016042	lipid catabolic process	0.0341838	1
biological_process	GO:0006790	sulfur compound metabolic process	0.0342713	1
biological_process	GO:0009062	fatty acid catabolic process	0.0342972	1
biological_process	GO:0035150	regulation of tube size	0.0344029	1
biological_process	GO:0014068	positive regulation of phosphatidylinositol 3-kinase signaling	0.0344076	1
biological_process	GO:0031532	actin cytoskeleton reorganization	0.0344886	1
biological_process	GO:0032507	maintenance of protein location in cell	0.0350632	1
biological_process	GO:0042267	natural killer cell mediated cytotoxicity	0.0350632	1
biological_process	GO:0046425	regulation of receptor signaling pathway via JAK-STAT	0.0350926	1
biological_process	GO:0098754	detoxification	0.0350926	1
molecular_function	GO:0004601	peroxidase activity	0.0352312	1
cellular_component	GO:0005793	endoplasmic reticulum-Golgi intermediate compartment	0.035273	1
biological_process	GO:0007259	receptor signaling pathway via JAK-STAT	0.0352748	1
cellular_component	GO:0019908	nuclear cyclin-dependent protein kinase holoenzyme complex	0.0353544	1
biological_process	GO:0045023	G0 to G1 transition	0.0354238	1
biological_process	GO:0120163	negative regulation of cold-induced thermogenesis	0.0354238	1
biological_process	GO:0001905	activation of membrane attack complex	0.0356762	1
biological_process	GO:0001951	intestinal D-glucose absorption	0.0356762	1
biological_process	GO:0001969	regulation of activation of membrane attack complex	0.0356762	1
biological_process	GO:0002266	follicular dendritic cell activation	0.0356762	1
biological_process	GO:0002434	immune complex clearance	0.0356762	1
biological_process	GO:0002874	regulation of chronic inflammatory response to antigenic stimulus	0.0356762	1
biological_process	GO:0003275	apoptotic process involved in outflow tract morphogenesis	0.0356762	1
biological_process	GO:0006083	acetate metabolic process	0.0356762	1
biological_process	GO:0006211	5-methylcytosine catabolic process	0.0356762	1
biological_process	GO:0006447	regulation of translational initiation by iron	0.0356762	1
biological_process	GO:0006452	translational frameshifting	0.0356762	1
biological_process	GO:0007231	osmosensory signaling pathway	0.0356762	1
biological_process	GO:0010979	regulation of vitamin D 24-hydroxylase activity	0.0356762	1
biological_process	GO:0010980	positive regulation of vitamin D 24-hydroxylase activity	0.0356762	1
biological_process	GO:0016095	polyprenol catabolic process	0.0356762	1
biological_process	GO:0016128	phytosteroid metabolic process	0.0356762	1
biological_process	GO:0016129	phytosteroid biosynthetic process	0.0356762	1
biological_process	GO:0019249	lactate biosynthetic process	0.0356762	1
biological_process	GO:0019857	5-methylcytosine metabolic process	0.0356762	1
biological_process	GO:0021569	rhombomere 3 development	0.0356762	1
biological_process	GO:0021586	pons maturation	0.0356762	1
biological_process	GO:0030450	regulation of complement activation, classical pathway	0.0356762	1
biological_process	GO:0030846	termination of RNA polymerase II transcription, poly(A)-coupled	0.0356762	1
biological_process	GO:0030910	olfactory placode formation	0.0356762	1
biological_process	GO:0032765	positive regulation of mast cell cytokine production	0.0356762	1
biological_process	GO:0032804	negative regulation of low-density lipoprotein particle receptor catabolic process	0.0356762	1
biological_process	GO:0033058	directional locomotion	0.0356762	1
biological_process	GO:0035633	maintenance of permeability of blood-brain barrier	0.0356762	1
biological_process	GO:0035684	helper T cell extravasation	0.0356762	1
biological_process	GO:0035697	CD8-positive, alpha-beta T cell extravasation	0.0356762	1
biological_process	GO:0036369	transcription factor catabolic process	0.0356762	1
biological_process	GO:0042374	phylloquinone metabolic process	0.0356762	1
biological_process	GO:0042376	phylloquinone catabolic process	0.0356762	1
biological_process	GO:0042427	serotonin biosynthetic process	0.0356762	1
biological_process	GO:0042478	regulation of eye photoreceptor cell development	0.0356762	1
biological_process	GO:0043321	regulation of natural killer cell degranulation	0.0356762	1
biological_process	GO:0043323	positive regulation of natural killer cell degranulation	0.0356762	1
biological_process	GO:0044111	development involved in symbiotic interaction	0.0356762	1
biological_process	GO:0045079	negative regulation of chemokine biosynthetic process	0.0356762	1
biological_process	GO:0045959	negative regulation of complement activation, classical pathway	0.0356762	1
biological_process	GO:0051025	negative regulation of immunoglobulin secretion	0.0356762	1
biological_process	GO:0051365	cellular response to potassium ion starvation	0.0356762	1
biological_process	GO:0060086	circadian temperature homeostasis	0.0356762	1
biological_process	GO:0060671	epithelial cell differentiation involved in embryonic placenta development	0.0356762	1
biological_process	GO:0060672	epithelial cell morphogenesis involved in placental branching	0.0356762	1
biological_process	GO:0060846	blood vessel endothelial cell fate commitment	0.0356762	1
biological_process	GO:0060847	endothelial cell fate specification	0.0356762	1
biological_process	GO:0071641	negative regulation of macrophage inflammatory protein 1 alpha production	0.0356762	1
biological_process	GO:0071698	olfactory placode development	0.0356762	1
biological_process	GO:0071699	olfactory placode morphogenesis	0.0356762	1
biological_process	GO:0090258	negative regulation of mitochondrial fission	0.0356762	1
biological_process	GO:0097101	blood vessel endothelial cell fate specification	0.0356762	1
biological_process	GO:1900623	regulation of monocyte aggregation	0.0356762	1
biological_process	GO:1900625	positive regulation of monocyte aggregation	0.0356762	1
biological_process	GO:1900673	olefin metabolic process	0.0356762	1
biological_process	GO:1901662	quinone catabolic process	0.0356762	1
biological_process	GO:1901671	positive regulation of superoxide dismutase activity	0.0356762	1
biological_process	GO:1901858	regulation of mitochondrial DNA metabolic process	0.0356762	1
biological_process	GO:1902226	regulation of macrophage colony-stimulating factor signaling pathway	0.0356762	1
biological_process	GO:1902256	regulation of apoptotic process involved in outflow tract morphogenesis	0.0356762	1
biological_process	GO:1902856	negative regulation of non-motile cilium assembly	0.0356762	1
biological_process	GO:1902896	terminal web assembly	0.0356762	1
biological_process	GO:1902958	positive regulation of mitochondrial electron transport, NADH to ubiquinone	0.0356762	1
biological_process	GO:1902988	neurofibrillary tangle assembly	0.0356762	1
biological_process	GO:1903027	regulation of opsonization	0.0356762	1
biological_process	GO:1903412	response to bile acid	0.0356762	1
biological_process	GO:1903413	cellular response to bile acid	0.0356762	1
biological_process	GO:1903842	response to arsenite ion	0.0356762	1
biological_process	GO:1903843	cellular response to arsenite ion	0.0356762	1
biological_process	GO:1903984	positive regulation of TRAIL-activated apoptotic signaling pathway	0.0356762	1
biological_process	GO:1904383	response to sodium phosphate	0.0356762	1
biological_process	GO:1904594	regulation of termination of RNA polymerase II transcription	0.0356762	1
biological_process	GO:1904640	response to methionine	0.0356762	1
biological_process	GO:1904825	protein localization to microtubule plus-end	0.0356762	1
biological_process	GO:1904833	positive regulation of removal of superoxide radicals	0.0356762	1
biological_process	GO:1904880	response to hydrogen sulfide	0.0356762	1
biological_process	GO:1905246	negative regulation of aspartic-type peptidase activity	0.0356762	1
biological_process	GO:1905581	positive regulation of low-density lipoprotein particle clearance	0.0356762	1
biological_process	GO:1905602	positive regulation of receptor-mediated endocytosis involved in cholesterol transport	0.0356762	1
biological_process	GO:1905725	protein localization to microtubule end	0.0356762	1
biological_process	GO:1990108	protein linear deubiquitination	0.0356762	1
biological_process	GO:1990418	response to insulin-like growth factor stimulus	0.0356762	1
biological_process	GO:1990442	intrinsic apoptotic signaling pathway in response to nitrosative stress	0.0356762	1
biological_process	GO:2000120	positive regulation of sodium-dependent phosphate transport	0.0356762	1
biological_process	GO:2000449	regulation of CD8-positive, alpha-beta T cell extravasation	0.0356762	1
biological_process	GO:2000721	positive regulation of transcription from RNA polymerase II promoter involved in smooth muscle cell differentiation	0.0356762	1
biological_process	GO:2000804	regulation of termination of RNA polymerase II transcription, poly(A)-coupled	0.0356762	1
biological_process	GO:2001170	negative regulation of ATP biosynthetic process	0.0356762	1
biological_process	GO:2001183	negative regulation of interleukin-12 secretion	0.0356762	1
biological_process	GO:2001190	positive regulation of T cell activation via T cell receptor contact with antigen bound to MHC molecule on antigen presenting cell	0.0356762	1
biological_process	GO:2001293	malonyl-CoA metabolic process	0.0356762	1
biological_process	GO:0030518	intracellular steroid hormone receptor signaling pathway	0.0357393	1
biological_process	GO:0050671	positive regulation of lymphocyte proliferation	0.0357393	1
biological_process	GO:0048568	embryonic organ development	0.0357849	1
biological_process	GO:0051047	positive regulation of secretion	0.0357849	1
biological_process	GO:0003228	atrial cardiac muscle tissue development	0.0359008	1
biological_process	GO:0021546	rhombomere development	0.0359008	1
biological_process	GO:0031622	positive regulation of fever generation	0.0359008	1
biological_process	GO:0032226	positive regulation of synaptic transmission, dopaminergic	0.0359008	1
biological_process	GO:0032532	regulation of microvillus length	0.0359008	1
biological_process	GO:0032988	ribonucleoprotein complex disassembly	0.0359008	1
biological_process	GO:0043307	eosinophil activation	0.0359008	1
biological_process	GO:0045084	positive regulation of interleukin-12 biosynthetic process	0.0359008	1
[truncated: 20,752 more rows]
