# Supplementary material for: Rapid Identification of Druggable Targets and the Power of the PHENotype SIMulator for Effective Drug Repurposing in COVID-19
Source: Research Square preprint supplement (doi:10.21203/rs.3.rs-287183/v1), 2021-04-14
Supplement: Supplementary file 6 [file A549-ACE2_MOI_2.xlsx]

## Sheet: MITHrIL
Pathway.Id	Pathway.Name	Impact.Factor	Probability.Pi	Probability.Network	Corrected.Accumulator	pValue	Adjusted.pValue
path:hsa01100	Metabolic pathways	35.0265	5.9601e-15	4.9975e-06	-848.189	0	0
path:hsa01200	Carbon metabolism	21.1744	7.7227e-09	4.9975e-06	-152.948	5.26912e-13	6.5864e-11
path:hsa01230	Biosynthesis of amino acids	19.5922	2.88596e-08	4.9975e-06	-84.6766	1.70064e-12	1.4172e-10
path:hsa00280	Valine, leucine and isoleucine degradation	17.1574	4.29404e-07	4.9975e-06	-76.7841	2.00754e-11	1.25471e-09
path:hsa00010	Glycolysis / Gluconeogenesis	15.3177	1.48547e-06	4.9975e-06	-57.7757	6.47866e-11	3.23933e-09
path:hsa00480	Glutathione metabolism	13.4634	9.05064e-06	4.9975e-06	-50.0358	3.75543e-10	1.34123e-08
path:hsa00270	Cysteine and methionine metabolism	13.8517	7.75616e-06	4.9975e-06	-37.4083	3.22341e-10	1.34123e-08
path:hsa00410	beta-Alanine metabolism	12.3628	3.28692e-05	4.9975e-06	-32.7818	1.37641e-09	4.30127e-08
path:hsa00020	Citrate cycle (TCA cycle)	12.0751	7.84107e-05	4.9975e-06	-41.7135	3.38846e-09	9.4124e-08
path:hsa00030	Pentose phosphate pathway	10.9676	0.00014266	4.9975e-06	-39.2568	6.38672e-09	1.59668e-07
path:hsa00620	Pyruvate metabolism	10.6903	0.000194826	4.9975e-06	-40.0391	8.92758e-09	2.029e-07
path:hsa00983	Drug metabolism - other enzymes	9.97033	0.000233371	4.9975e-06	-33.2259	1.08568e-08	2.26183e-07
path:hsa04622	RIG-I-like receptor signaling pathway	10.0557	0.000462197	4.9975e-06	52.691	2.30363e-08	4.43005e-07
path:hsa01212	Fatty acid metabolism	10.0072	0.00101961	4.9975e-06	-80.6099	5.64811e-08	1.00859e-06
path:hsa00062	Fatty acid elongation	9.46713	0.00229058	4.9975e-06	-59.1422	1.46257e-07	1.92444e-06
path:hsa00640	Propanoate metabolism	8.75632	0.00211694	4.9975e-06	-48.1453	1.33086e-07	1.92444e-06
path:hsa00650	Butanoate metabolism	9.28341	0.00219704	4.9975e-06	-45.2228	1.3913e-07	1.92444e-06
path:hsa00350	Tyrosine metabolism	8.16678	0.00226421	4.9975e-06	-43.8826	1.4424e-07	1.92444e-06
path:hsa00260	Glycine, serine and threonine metabolism	8.59308	0.00226421	4.9975e-06	-43.6912	1.4424e-07	1.92444e-06
path:hsa00071	Fatty acid degradation	8.64111	0.00311126	4.9975e-06	-70.9518	2.11832e-07	2.64789e-06
path:hsa00860	Porphyrin and chlorophyll metabolism	8.34711	0.003877	4.9975e-06	-50.397	2.77531e-07	3.30394e-06
path:hsa00330	Arginine and proline metabolism	7.46347	0.00417731	4.9975e-06	-43.9273	3.04395e-07	3.45903e-06
path:hsa00310	Lysine degradation	7.08689	0.0097799	4.9975e-06	-39.4707	9.01387e-07	9.79769e-06
path:hsa00052	Galactose metabolism	6.56951	0.0130625	4.9975e-06	-29.1514	1.32431e-06	1.37949e-05
path:hsa01040	Biosynthesis of unsaturated fatty acids	6.76624	0.0137197	4.9975e-06	-20.1248	1.41486e-06	1.41486e-05
path:hsa00100	Steroid biosynthesis	7.68177	0.0152845	4.9975e-06	-43.1208	1.63803e-06	1.51669e-05
path:hsa00340	Histidine metabolism	6.07882	0.0152845	4.9975e-06	-19.1667	1.63803e-06	1.51669e-05
path:hsa00230	Purine metabolism	6.1222	0.0178353	4.9975e-06	-63.9765	2.02419e-06	1.74499e-05
path:hsa00051	Fructose and mannose metabolism	6.17021	0.0176279	4.9975e-06	-33.178	1.99178e-06	1.74499e-05
path:hsa04064	NF-kappa B signaling pathway	6.06854	0.0187506	4.9975e-06	49.5367	2.16937e-06	1.80781e-05
path:hsa00980	Metabolism of xenobiotics by cytochrome P450	5.62642	0.0195959	4.9975e-06	-35.1095	2.30647e-06	1.86006e-05
path:hsa04658	Th1 and Th2 cell differentiation	6.46683	0.0304757	4.9975e-06	69.5857	4.3236e-06	3.37781e-05
path:hsa00471	D-Glutamine and D-glutamate metabolism	0	1	4.9975e-06	-8.23935	4.9975e-06	3.67463e-05
path:hsa04217	Necroptosis	9.14073	0.000844375	0.0009995	58.094	5.27375e-06	3.76696e-05
path:hsa00380	Tryptophan metabolism	5.36245	0.0382667	4.9975e-06	-31.7178	6.04684e-06	4.19919e-05
path:hsa04630	JAK-STAT signaling pathway	5.81959	0.0432774	4.9975e-06	141.778	7.27574e-06	4.91604e-05
path:hsa04620	Toll-like receptor signaling pathway	5.78852	0.0454573	4.9975e-06	74.9524	7.83974e-06	5.02547e-05
path:hsa00630	Glyoxylate and dicarboxylate metabolism	6.21911	0.0451638	4.9975e-06	-54.7217	7.76277e-06	5.02547e-05
path:hsa01210	2-Oxocarboxylic acid metabolism	5.55415	0.0481095	4.9975e-06	-22.97	8.54999e-06	5.34374e-05
path:hsa04723	Retrograde endocannabinoid signaling	9.99086	0.000394506	0.00549725	38.6809	1.51252e-05	9.22271e-05
path:hsa00982	Drug metabolism - cytochrome P450	4.15482	0.0724211	4.9975e-06	-21.2737	1.63037e-05	9.70461e-05
path:hsa00561	Glycerolipid metabolism	4.56175	0.0771815	4.9975e-06	-32.2469	1.80898e-05	0.000105173
path:hsa00053	Ascorbate and aldarate metabolism	4.31372	0.0816278	4.9975e-06	-16.3819	1.98394e-05	0.000112724
path:hsa00790	Folate biosynthesis	5.33809	0.0860385	4.9975e-06	-30.663	2.16537e-05	0.000117683
path:hsa00040	Pentose and glucuronate interconversions	4.60527	0.0860385	4.9975e-06	-27.3919	2.16537e-05	0.000117683
path:hsa04380	Osteoclast differentiation	4.87171	0.0901764	4.9975e-06	74.6071	2.34281e-05	0.00012204
path:hsa00450	Selenocompound metabolism	4.98619	0.0901846	4.9975e-06	-18.748	2.34317e-05	0.00012204
path:hsa00970	Aminoacyl-tRNA biosynthesis	5.5163	0.106847	4.9975e-06	-54.3765	3.13041e-05	0.000159715
path:hsa00510	N-Glycan biosynthesis	5.76114	0.108525	4.9975e-06	-80.2033	3.21635e-05	0.000160818
path:hsa00520	Amino sugar and nucleotide sugar metabolism	4.50826	0.119461	4.9975e-06	-38.253	3.80694e-05	0.000185791
path:hsa00072	Synthesis and degradation of ketone bodies	5.24763	0.120475	4.9975e-06	-15.5376	3.86445e-05	0.000185791
path:hsa04210	Apoptosis	7.23053	0.011605	0.00049975	53.8568	4.21285e-05	0.000198719
path:hsa00240	Pyrimidine metabolism	4.00235	0.131977	4.9975e-06	-31.4155	4.55035e-05	0.000210664
path:hsa00590	Arachidonic acid metabolism	3.66485	0.173345	4.9975e-06	-25.0048	7.56582e-05	0.000343901
path:hsa00250	Alanine, aspartate and glutamate metabolism	4.52067	0.176655	4.9975e-06	-43.0556	7.84716e-05	0.00035032
path:hsa00920	Sulfur metabolism	7.16526	0.0137197	0.0009995	-19.5025	9.03596e-05	0.000396314
path:hsa00531	Glycosaminoglycan degradation	6.5156	0.0291061	0.00049975	-24.9574	0.000123099	0.000530601
path:hsa04151	PI3K-Akt signaling pathway	3.72151	0.227192	4.9975e-06	114.226	0.000129853	0.000550224
path:hsa00670	One carbon pool by folate	3.73455	0.244932	4.9975e-06	-17.1718	0.00015206	0.000633582
path:hsa04657	IL-17 signaling pathway	11.5425	0.000203524	0.0714643	13.1544	0.000203234	0.000832927
path:hsa04623	Cytosolic DNA-sensing pathway	6.85902	0.0176279	0.001999	39.0324	0.00021252	0.000856934
path:hsa04621	NOD-like receptor signaling pathway	5.81541	0.0315531	0.0009995	67.7091	0.0002332	0.000925398
path:hsa04010	MAPK signaling pathway	5.90627	0.0206413	0.00249875	73.0336	0.000304061	0.00118774
path:hsa04727	GABAergic synapse	6.08425	0.0449946	0.0009995	30.0895	0.000357064	0.00137332
path:hsa04061	Viral protein interaction with cytokine and cytokine receptor	2.88805	0.392846	4.9975e-06	51.8099	0.000456974	0.00173096
path:hsa04115	p53 signaling pathway	9.04417	0.00112575	0.0614693	-16.0582	0.000575245	0.00214644
path:hsa04710	Circadian rhythm	3.71204	0.123759	0.00049975	-20.0023	0.000831709	0.00305775
path:hsa04935	Growth hormone synthesis, secretion and action	6.12376	0.101554	0.0009995	77.827	0.00101709	0.0036851
path:hsa04668	TNF signaling pathway	5.59132	0.0705721	0.001999	50.0366	0.00104963	0.00374868
path:hsa04659	Th17 cell differentiation	5.76658	0.0913281	0.00149925	59.4437	0.00117928	0.00415238
path:hsa04926	Relaxin signaling pathway	4.66628	0.583919	4.9975e-06	76.2815	0.00147148	0.00510932
path:hsa00563	Glycosylphosphatidylinositol (GPI)-anchor biosynthesis	8.5293	0.00229058	0.0929535	-12.7845	0.0016407	0.00561885
path:hsa00130	Ubiquinone and other terpenoid-quinone biosynthesis	4.74475	0.109763	0.001999	-14.4397	0.00184534	0.00623425
path:hsa04962	Vasopressin-regulated water reabsorption	8.07259	0.00204382	0.117941	-6.89859	0.00206217	0.00687389
path:hsa04014	Ras signaling pathway	3.32533	0.676683	4.9975e-06	87.9907	0.00256051	0.00842274
path:hsa00061	Fatty acid biosynthesis	4.97275	0.277681	0.00049975	-21.9888	0.00303602	0.00985722
path:hsa04721	Synaptic vesicle cycle	7.83736	0.00204382	0.168916	6.64309	0.00338387	0.0107085
path:hsa00290	Valine, leucine and isoleucine biosynthesis	5.58645	0.0171652	0.0429785	-2.98767	0.00335862	0.0107085
path:hsa04060	Cytokine-cytokine receptor interaction	2.20308	0.728891	4.9975e-06	118.852	0.00354555	0.0110798
path:hsa03320	PPAR signaling pathway	3.34252	0.324067	0.00049975	-18.3732	0.00403	0.0124383
path:hsa00500	Starch and sucrose metabolism	4.55922	0.0497836	0.021989	-13.0123	0.00481417	0.0146773
path:hsa04062	Chemokine signaling pathway	3.85643	0.79688	4.9975e-06	127.075	0.00560285	0.0168761
path:hsa00360	Phenylalanine metabolism	6.91316	0.00415126	0.174913	-2.86244	0.0057437	0.0170943
path:hsa04625	C-type lectin receptor signaling pathway	4.77896	0.14504	0.00649675	53.6949	0.00613128	0.0180332
path:hsa00780	Biotin metabolism	5.01183	0.0474306	0.0314843	-3.33768	0.00628225	0.0182623
path:hsa04672	Intestinal immune network for IgA production	3.66204	0.335744	0.0009995	18.1338	0.00647543	0.0186076
path:hsa04066	HIF-1 signaling pathway	5.12867	0.14504	0.00749625	38.8639	0.00679047	0.0192911
path:hsa00600	Sphingolipid metabolism	3.16151	0.409928	0.0009995	-28.0375	0.00948146	0.0266333
path:hsa00900	Terpenoid backbone biosynthesis	3.4276	0.335744	0.001999	-16.9706	0.00976733	0.0268333
path:hsa00830	Retinol metabolism	3.29785	0.159336	0.0104948	-13.6374	0.00971324	0.0268333
path:hsa04216	Ferroptosis	6.21504	0.0816278	0.0294853	-11.6213	0.0101391	0.027475
path:hsa00190	Oxidative phosphorylation	3.11187	0.175504	0.00949525	-9.26888	0.0102207	0.027475
path:hsa04110	Cell cycle	4.81918	0.0731152	0.0569715	-20.5578	0.0159707	0.0424752
path:hsa00472	D-Arginine and D-ornithine metabolism	0	1	0.0164918	-0.161785	0.0164918	0.0433994
path:hsa00140	Steroid hormone biosynthesis	2.83787	0.53841	0.0009995	-31.1109	0.0171281	0.0446044
path:hsa04917	Prolactin signaling pathway	5.67433	0.385868	0.003998	51.8345	0.0187375	0.0482925
path:hsa04922	Glucagon signaling pathway	5.42138	0.0333435	0.141429	-15.6442	0.0198887	0.0507365
path:hsa04141	Protein processing in endoplasmic reticulum	6.67458	0.00823278	0.311344	-3.89182	0.0204831	0.0517249
path:hsa04145	Phagosome	3.14446	0.175504	0.031984	5.35492	0.0244582	0.0611455
path:hsa00604	Glycosphingolipid biosynthesis - ganglio series	4.04092	0.396097	0.005997	-15.5365	0.0248362	0.0614756
path:hsa04971	Gastric acid secretion	4.67878	0.237826	0.021989	28.4481	0.0268832	0.0658902
path:hsa04920	Adipocytokine signaling pathway	4.22244	0.649926	0.0009995	36.603	0.0278799	0.0676697
path:hsa00564	Glycerophospholipid metabolism	3.3763	0.208956	0.0304848	-22.5798	0.0288673	0.0693925
path:hsa04662	B cell receptor signaling pathway	4.29087	0.618774	0.00149925	57.1354	0.0297228	0.0701009
path:hsa04910	Insulin signaling pathway	4.38178	0.200194	0.033983	31.4164	0.0296974	0.0701009
path:hsa04218	Cellular senescence	5.81572	0.0492343	0.163418	18.7248	0.0313233	0.0731852
path:hsa04713	Circadian entrainment	3.68368	0.388898	0.0114943	36.515	0.0353627	0.0818582
path:hsa00750	Vitamin B6 metabolism	3.57346	0.377315	0.0134933	-8.62088	0.0371374	0.0851776
path:hsa00400	Phenylalanine, tyrosine and tryptophan biosynthesis	4.00847	0.0609803	0.169915	-2.07868	0.0384851	0.0874661
path:hsa04722	Neurotrophin signaling pathway	4.68661	0.328878	0.025987	48.7736	0.0457619	0.103067
path:hsa04960	Aldosterone-regulated sodium reabsorption	4.99227	0.583154	0.0049975	21.4776	0.0471598	0.105267
path:hsa04660	T cell receptor signaling pathway	4.38331	0.796783	0.0009995	65.3423	0.0549994	0.12168
path:hsa04610	Complement and coagulation cascades	2.17433	0.479748	0.0144928	-16.3669	0.0570524	0.124405
path:hsa04976	Bile secretion	4.13387	0.130927	0.133433	-6.98214	0.0572263	0.124405
path:hsa04540	Gap junction	4.67516	0.651009	0.00449775	46.3323	0.0578903	0.124764
path:hsa04923	Regulation of lipolysis in adipocytes	6.34458	0.53841	0.0109945	28.8768	0.060393	0.129045
path:hsa04725	Cholinergic synapse	4.85853	0.744126	0.00249875	52.7261	0.0641248	0.134992
path:hsa04068	FoxO signaling pathway	4.7731	0.238914	0.0749625	28.9818	0.0642562	0.134992
path:hsa04211	Longevity regulating pathway	5.54895	0.382506	0.0344828	27.8277	0.0671531	0.139902
path:hsa00592	alpha-Linolenic acid metabolism	2.34499	0.886358	0.00049975	-9.40857	0.0703617	0.145375
path:hsa03015	mRNA surveillance pathway	2.11046	0.423337	0.0309845	-5.63248	0.0726195	0.14881
path:hsa04977	Vitamin digestion and absorption	0	1	0.077961	-2.10809	0.077961	0.158457
path:hsa04966	Collecting duct acid secretion	0	1	0.0834583	4.85697	0.0834583	0.168263
path:hsa00603	Glycosphingolipid biosynthesis - globo and isoglobo series	2.85264	0.614159	0.013993	-8.39745	0.0887215	0.177443
path:hsa00532	Glycosaminoglycan biosynthesis - chondroitin sulfate / dermatan sulfate	2.89624	0.239843	0.122939	-4.5985	0.0933623	0.185243
path:hsa00512	Mucin type O-glycan biosynthesis	2.53965	0.689898	0.00949525	-16.513	0.0953929	0.187781
path:hsa00730	Thiamine metabolism	2.50347	0.53628	0.0269865	-5.35477	0.0971026	0.189653
path:hsa04928	Parathyroid hormone synthesis, secretion and action	4.27877	0.258675	0.122939	22.8533	0.100563	0.19489
path:hsa04512	ECM-receptor interaction	1.98697	0.59784	0.0224888	-15.2836	0.107033	0.205833
path:hsa04726	Serotonergic synapse	4.41202	0.780726	0.005997	39.3741	0.109588	0.209138
path:hsa04371	Apelin signaling pathway	4.19156	0.416914	0.065967	31.1943	0.112447	0.212968
path:hsa04914	Progesterone-mediated oocyte maturation	4.56083	0.714481	0.013993	36.8744	0.124401	0.233837
path:hsa04979	Cholesterol metabolism	4.18847	0.0697913	0.449275	0.352051	0.128231	0.239237
path:hsa04650	Natural killer cell mediated cytotoxicity	3.36549	0.955767	0.00049975	68.3088	0.130874	0.24236
path:hsa04664	Fc epsilon RI signaling pathway	5.08524	0.748588	0.0154923	40.5724	0.146486	0.269276
path:hsa00120	Primary bile acid biosynthesis	4.16764	0.210503	0.253373	-5.73477	0.14953	0.272866
path:hsa00524	Neomycin, kanamycin and gentamicin biosynthesis	2.69725	0.834373	0.00849575	-3.00477	0.158469	0.287082
path:hsa04140	Autophagy - animal	4.12405	0.645994	0.0409795	37.6603	0.167239	0.30079
path:hsa04260	Cardiac muscle contraction	3.40151	0.277681	0.224388	5.54241	0.170392	0.304272
path:hsa04913	Ovarian steroidogenesis	3.652	0.689898	0.0354823	-12.9445	0.177116	0.314036
path:hsa04740	Olfactory transduction	3.08598	0.479344	0.109945	11.7068	0.182966	0.322122
path:hsa04614	Renin-angiotensin system	2.76904	0.74036	0.0284858	-2.10435	0.186652	0.326315
path:hsa04213	Longevity regulating pathway - multiple species	5.07506	0.429432	0.143928	13.3847	0.190168	0.330153
path:hsa04728	Dopaminergic synapse	3.69118	0.471501	0.122939	20.9972	0.19185	0.330301
path:hsa00760	Nicotinate and nicotinamide metabolism	3.18033	0.901928	0.005997	-20.8739	0.194217	0.330301
path:hsa04340	Hedgehog signaling pathway	3.34158	0.627528	0.0604698	-10.9169	0.193086	0.330301
path:hsa04152	AMPK signaling pathway	4.06001	0.4332	0.149425	15.9028	0.196671	0.332215
path:hsa04550	Signaling pathways regulating pluripotency of stem cells	4.08909	0.883934	0.00949525	43.208	0.207891	0.34881
path:hsa04150	mTOR signaling pathway	3.37113	0.651628	0.0649675	31.0236	0.213237	0.353288
path:hsa04137	Mitophagy - animal	5.105	0.225748	0.355322	5.07909	0.213386	0.353288
path:hsa03013	RNA transport	1.52062	0.840307	0.0189905	-9.16414	0.222669	0.366233
path:hsa04015	Rap1 signaling pathway	3.08769	0.840426	0.01999	56.0404	0.227249	0.36653
path:hsa04071	Sphingolipid signaling pathway	5.37282	0.817092	0.0244878	43.0551	0.225818	0.36653
path:hsa00220	Arginine biosynthesis	6.0705	0.986968	0.00049975	-22.0289	0.225615	0.36653
path:hsa04122	Sulfur relay system	1.9345	0.600573	0.10045	-1.96372	0.234474	0.37576
path:hsa04350	TGF-beta signaling pathway	2.7955	0.832992	0.023988	-24.0245	0.237226	0.377748
path:hsa03018	RNA degradation	1.64712	0.751377	0.0484758	-3.17833	0.243947	0.385992
path:hsa04915	Estrogen signaling pathway	4.74915	0.884093	0.015992	46.6941	0.251117	0.39237
path:hsa00770	Pantothenate and CoA biosynthesis	3.05643	0.422056	0.224888	-6.28199	0.250325	0.39237
path:hsa04924	Renin secretion	5.39939	0.744806	0.0569715	20.7045	0.257106	0.398171
path:hsa04919	Thyroid hormone signaling pathway	4.59477	0.486154	0.188406	17.4098	0.258015	0.398171
path:hsa04261	Adrenergic signaling in cardiomyocytes	3.07317	0.609704	0.11944	22.1002	0.262434	0.402505
path:hsa04927	Cortisol synthesis and secretion	4.45066	0.228418	0.454273	1.91683	0.271805	0.414337
path:hsa04070	Phosphatidylinositol signaling system	4.062	0.4795	0.235882	12.1124	0.29281	0.443652
path:hsa04012	ErbB signaling pathway	4.27321	0.85142	0.035982	37.58	0.296276	0.444997
path:hsa04975	Fat digestion and absorption	5.05723	0.834373	0.0429785	-4.24396	0.299038	0.444997
path:hsa00910	Nitrogen metabolism	2.92909	0.53628	0.1994	-4.05145	0.29728	0.444997
path:hsa04964	Proximal tubule bicarbonate reclamation	2.09166	0.786171	0.0674663	-3.33828	0.309878	0.4584
path:hsa04114	Oocyte meiosis	2.57653	0.67138	0.128436	-15.9865	0.312786	0.45998
path:hsa04330	Notch signaling pathway	2.09587	0.805381	0.0634683	-14.5802	0.319022	0.466407
path:hsa00232	Caffeine metabolism	2.1498	0.458321	0.292854	0.629652	0.322963	0.469422
path:hsa04724	Glutamatergic synapse	4.26764	0.947746	0.0129935	34.5973	0.334908	0.483971
path:hsa04916	Melanogenesis	4.1199	0.833662	0.0609695	28.4407	0.341391	0.490504
path:hsa00740	Riboflavin metabolism	2.67055	0.600573	0.205397	-2.48356	0.344063	0.491518
path:hsa04144	Endocytosis	3.71777	0.258675	0.547226	-1.06577	0.354238	0.50318
path:hsa04730	Long-term depression	7.3051	0.971485	0.00849575	36.6057	0.366135	0.51714
path:hsa04714	Thermogenesis	3.48166	0.520388	0.302349	6.77053	0.370743	0.520706
path:hsa00785	Lipoic acid metabolism	4.51392	0.834373	0.089955	-3.88861	0.396956	0.554407
path:hsa04612	Antigen processing and presentation	2.47139	0.547833	0.317341	-2.19923	0.400909	0.556819
path:hsa04072	Phospholipase D signaling pathway	4.50146	0.909072	0.0464768	36.9519	0.403646	0.557523
path:hsa04360	Axon guidance	3.17618	0.983523	0.0069965	52.873	0.409177	0.559347
path:hsa00513	Various types of N-glycan biosynthesis	5.88301	0.9739	0.011994	-19.4973	0.41164	0.559347
path:hsa04666	Fc gamma R-mediated phagocytosis	3.65498	0.693597	0.205897	15.476	0.411961	0.559347
path:hsa04970	Salivary secretion	3.10539	0.591614	0.294853	7.2365	0.413917	0.559347
path:hsa04215	Apoptosis - multiple species	3.64144	0.436236	0.447776	-0.963308	0.418265	0.562184
path:hsa04514	Cell adhesion molecules (CAMs)	1.74383	0.807647	0.125437	8.52572	0.421812	0.563919
path:hsa04024	cAMP signaling pathway	3.0436	0.935226	0.0374813	40.2429	0.425733	0.566135
path:hsa03460	Fanconi anemia pathway	2.14429	0.654565	0.269865	-5.57815	0.43943	0.578197
path:hsa04925	Aldosterone synthesis and secretion	3.41939	0.412501	0.501249	-0.0283514	0.438751	0.578197
path:hsa00440	Phosphonate and phosphinate metabolism	1.8569	0.59447	0.328336	-0.706217	0.442246	0.578856
path:hsa03440	Homologous recombination	3.56828	0.867968	0.0989505	-4.62001	0.451958	0.588486
path:hsa04130	SNARE interactions in vesicular transport	1.67843	0.583154	0.358821	1.18892	0.457304	0.592362
path:hsa00534	Glycosaminoglycan biosynthesis - heparan sulfate / heparin	2.00717	0.458321	0.488256	0.0977174	0.462226	0.595651
path:hsa04370	VEGF signaling pathway	6.35088	0.89405	0.085957	25.8835	0.466829	0.596832
path:hsa00430	Taurine and hypotaurine metabolism	2.06278	0.690174	0.270865	-1.35137	0.467916	0.596832
path:hsa04972	Pancreatic secretion	4.03114	0.692564	0.298351	6.46908	0.492661	0.625204
path:hsa04020	Calcium signaling pathway	2.49927	0.615807	0.378311	4.92656	0.495646	0.625816
path:hsa04921	Oxytocin signaling pathway	3.40501	0.908638	0.097951	27.1591	0.511028	0.641995
path:hsa04520	Adherens junction	4.38493	0.969731	0.0344828	-26.0858	0.516416	0.645521
path:hsa04961	Endocrine and other factor-regulated calcium reabsorption	5.31367	0.776246	0.254873	8.38008	0.528282	0.657067
path:hsa04912	GnRH signaling pathway	4.03987	0.59784	0.447276	2.45843	0.532465	0.658992
path:hsa04670	Leukocyte transendothelial migration	4.13832	0.995585	0.0089955	39.2739	0.570931	0.703117
path:hsa03008	Ribosome biogenesis in eukaryotes	1.52256	0.592998	1	0	0.592998	0.726713
path:hsa00515	Mannose type O-glycan biosynthesis	4.0302	0.963374	0.073963	-7.39107	0.596193	0.727064
path:hsa04022	cGMP-PKG signaling pathway	3.24595	0.955171	0.0989505	24.9865	0.613963	0.745101
path:hsa04611	Platelet activation	4.4336	0.946157	0.127936	25.7167	0.630845	0.761891
path:hsa04911	Insulin secretion	3.33393	0.522869	0.686157	-6.6622	0.649323	0.780436
path:hsa04136	Autophagy - other	5.92386	0.942853	0.158421	8.95309	0.658677	0.787892
path:hsa00565	Ether lipid metabolism	2.20048	0.950479	0.144928	-7.41628	0.662011	0.788108
path:hsa04973	Carbohydrate digestion and absorption	22.8012	0.963374	0.117941	10.2987	0.665838	0.788908
path:hsa04392	Hippo signaling pathway - multiple species	2.17399	0.884915	0.295852	3.39682	0.680537	0.80252
path:hsa04390	Hippo signaling pathway	2.26322	0.954911	0.177911	-15.7302	0.707211	0.83006
path:hsa04530	Tight junction	2.92735	0.471268	0.813093	-12.4011	0.718333	0.839175
path:hsa04918	Thyroid hormone synthesis	3.34292	0.575795	0.761119	-8.0175	0.737984	0.853571
path:hsa04810	Regulation of actin cytoskeleton	2.48818	0.886808	0.386307	7.20168	0.742503	0.853571
path:hsa04744	Phototransduction	3.55905	0.935859	0.276862	4.91726	0.744314	0.853571
path:hsa04978	Mineral absorption	2.66458	0.924981	0.294353	4.3009	0.737437	0.853571
path:hsa04750	Inflammatory mediator regulation of TRP channels	4.71201	0.993009	0.0809595	25.5764	0.773031	0.882455
path:hsa04720	Long-term potentiation	3.47332	0.90659	0.455772	1.54112	0.803686	0.91328
path:hsa04080	Neuroactive ligand-receptor interaction	1.93781	0.999999	0.00049975	-42.0868	0.840009	0.940486
path:hsa04510	Focal adhesion	2.75904	0.966641	0.34033	11.6112	0.842675	0.940486
path:hsa00562	Inositol phosphate metabolism	4.20037	0.808811	0.687156	-7.43246	0.832127	0.940486
path:hsa00601	Glycosphingolipid biosynthesis - lacto and neolacto series	2.17646	0.96754	0.333333	2.96379	0.841493	0.940486
path:hsa04742	Taste transduction	4.94699	0.780076	0.816092	-9.10645	0.881596	0.979552
path:hsa04310	Wnt signaling pathway	2.68979	0.935332	0.581709	-3.34673	0.888453	0.982802
path:hsa04270	Vascular smooth muscle contraction	2.85151	0.994631	0.457271	1.96682	0.958009	1
path:hsa00591	Linoleic acid metabolism	1.65988	0.935859	0.683158	-1.60486	0.921086	1
path:hsa02010	ABC transporters	0	1	1	0	1	1
path:hsa00514	Other types of O-glycan biosynthesis	0	1	1	0	1	1
path:hsa00511	Other glycan degradation	0	1	1	0	1	1
remaining	remaining	1	1	1	0	1	1
path:hsa03450	Non-homologous end-joining	0	1	1	0	1	1
path:hsa03420	Nucleotide excision repair	0	1	1	0	1	1
path:hsa04640	Hematopoietic cell lineage	0	1	1	0	1	1
path:hsa03430	Mismatch repair	0	1	1	0	1	1
path:hsa04974	Protein digestion and absorption	0	1	1	0	1	1
path:hsa03410	Base excision repair	0	1	1	0	1	1
path:hsa03060	Protein export	0	1	1	0	1	1
path:hsa03040	Spliceosome	0	1	1	0	1	1
path:hsa03050	Proteasome	0	1	1	0	1	1
path:hsa04146	Peroxisome	0	1	1	0	1	1
path:hsa04142	Lysosome	0	1	1	0	1	1
path:hsa03020	RNA polymerase	0	1	1	0	1	1
path:hsa03022	Basal transcription factors	0	1	1	0	1	1
path:hsa03030	DNA replication	0	1	1	0	1	1
path:hsa04120	Ubiquitin mediated proteolysis	0	1	1	0	1	1
path:hsa04929	GnRH secretion	0	1	1	0	1	1
path:hsa00533	Glycosaminoglycan biosynthesis - keratan sulfate	0	1	1	0	1	1
path:hsa03010	Ribosome	0	1	1	0	1	1

## Sheet: SPIA
Name	ID	pSize	NDE	pNDE	tA	pPERT	pG	pGFdr	pGFWER	Status
Parkinson's disease	05012	97	70	5.51257e-13	-11.5268	0.412	6.83928e-12	9.36981e-10	9.36981e-10	Inhibited
Huntington's disease	05016	158	96	2.58662e-10	1.51635	0.798	4.80965e-09	3.29461e-07	6.58921e-07	Activated
Alzheimer's disease	05010	142	87	9.74299e-10	-10.5303	0.337	7.49826e-09	3.42421e-07	1.02726e-06	Inhibited
Herpes simplex infection	05168	161	88	1.23821e-06	47.628	0.009	2.15215e-07	7.3711e-06	2.94844e-05	Activated
Circadian rhythm - mammal	04710	22	11	0.130927	-27.671	5e-06	9.97614e-06	0.000273346	0.00136673	Inhibited
Cytokine-cytokine receptor interaction	04060	202	74	0.475544	124.496	5e-06	3.31677e-05	0.000757328	0.00454397	Activated
RIG-I-like receptor signaling pathway	04622	55	33	0.00027396	21.6209	0.042	0.000142363	0.00278625	0.0195038	Activated
Protein processing in endoplasmic reticulum	04141	155	80	5.85467e-05	-8.15901	0.325	0.000225851	0.00386771	0.0309416	Inhibited
Influenza A	05164	151	72	0.00238637	34.9798	0.015	0.000402259	0.00612328	0.0551095	Activated
Lysosome	04142	118	60	0.000766215	-1.71945	0.072	0.000596092	0.00816647	0.0816647	Inhibited
Measles	05162	116	56	0.00494111	32.2286	0.028	0.0013677	0.0170341	0.187375	Activated
Hepatitis C	05160	114	54	0.0091465	29.4127	0.025	0.0021456	0.0244956	0.293947	Activated
NF-kappa B signaling pathway	04064	85	38	0.0653303	49.1985	0.005	0.00294856	0.0310733	0.403953	Activated
Small cell lung cancer	05222	82	36	0.0913281	-44.0889	0.005	0.00396894	0.038839	0.543745	Inhibited
Bile secretion	04976	54	24	0.131763	-9.34735	0.005	0.00548467	0.0500933	0.7514	Inhibited
Epstein-Barr virus infection	05169	193	87	0.00662476	20.3658	0.118	0.00637417	0.0545788	0.873261	Activated
Apoptosis	04210	80	36	0.0650772	50.9885	0.015	0.00774277	0.0623976	1	Activated
Cytosolic DNA-sensing pathway	04623	49	26	0.0115837	8.70426	0.1	0.0089898	0.0663567	1	Activated
NOD-like receptor signaling pathway	04621	54	30	0.00284194	8.69354	0.427	0.00936129	0.0663567	1	Activated
MAPK signaling pathway	04010	234	94	0.114743	42.2682	0.011	0.00968711	0.0663567	1	Activated
Jak-STAT signaling pathway	04630	121	56	0.0141163	-10.0959	0.115	0.0120507	0.0786167	1	Inhibited
Pathogenic Escherichia coli infection	05130	52	21	0.310767	-35.5605	0.008	0.0173955	0.108327	1	Inhibited
Osteoclast differentiation	04380	127	52	0.152998	37.17	0.026	0.025964	0.150064	1	Activated
p53 signaling pathway	04115	64	34	0.00411493	-0.239355	0.981	0.0262886	0.150064	1	Inhibited
Chemokine signaling pathway	04062	160	53	0.814647	68.41	0.007	0.0351666	0.192713	1	Activated
Tuberculosis	05152	162	68	0.0738803	40.2219	0.107	0.0461682	0.22773	1	Activated
Viral carcinogenesis	05203	189	84	0.0115524	-1.0228	0.694	0.0467102	0.22773	1	Inhibited
Amyotrophic lateral sclerosis (ALS)	05014	50	22	0.15817	23.6621	0.051	0.0469481	0.22773	1	Activated
Vibrio cholerae infection	05110	51	24	0.0724211	-4.15828	0.115	0.0482056	0.22773	1	Inhibited
Prostate cancer	05215	86	38	0.0773044	-29.5226	0.128	0.0555674	0.253758	1	Inhibited
Toll-like receptor signaling pathway	04620	87	38	0.090721	26.3389	0.161	0.076336	0.334673	1	Activated
Sulfur relay system	04122	10	4	0.518688	-5.08413	0.029	0.0781717	0.334673	1	Inhibited
Cocaine addiction	05030	43	20	0.106847	11.5206	0.153	0.083596	0.346994	1	Activated
Cell cycle	04110	121	52	0.0731152	22.1351	0.232	0.0861153	0.346994	1	Activated
Intestinal immune network for IgA production	04672	37	14	0.479344	6.13338	0.038	0.0911756	0.356887	1	Activated
Mineral absorption	04978	45	20	0.159336	2.21671	0.12	0.0947796	0.360689	1	Activated
Antigen processing and presentation	04612	59	25	0.196107	7.25244	0.112	0.10583	0.391857	1	Activated
ECM-receptor interaction	04512	79	29	0.505035	-13.6769	0.049	0.116286	0.419243	1	Inhibited
Olfactory transduction	04740	31	11	0.600018	13.7541	0.043	0.120163	0.422112	1	Activated
Type I diabetes mellitus	04940	36	17	0.115364	2.05329	0.283	0.144369	0.494463	1	Activated
Rheumatoid arthritis	05323	83	36	0.106801	3.21582	0.332	0.153867	0.51414	1	Activated
RNA degradation	03018	62	28	0.0916414	-1.3723	0.429	0.166541	0.531947	1	Inhibited
Insulin signaling pathway	04910	127	48	0.385924	-54.0356	0.106	0.171668	0.531947	1	Inhibited
Amphetamine addiction	05031	62	29	0.0561056	-2.33542	0.788	0.182096	0.531947	1	Inhibited
Type II diabetes mellitus	04930	41	12	0.862414	-18.756	0.052	0.18407	0.531947	1	Inhibited
Salmonella infection	05132	79	30	0.412416	-13.8601	0.11	0.185682	0.531947	1	Inhibited
Colorectal cancer	05210	61	19	0.830321	12.0706	0.055	0.186615	0.531947	1	Activated
Graft-versus-host disease	05332	30	14	0.157697	2.05329	0.291	0.1873	0.531947	1	Activated
Legionellosis	05134	53	25	0.065805	-2.9221	0.712	0.190258	0.531947	1	Inhibited
Viral myocarditis	05416	61	24	0.34893	10.9139	0.149	0.205711	0.560698	1	Activated
Thyroid cancer	05216	27	13	0.137857	6.9033	0.41	0.218915	0.560698	1	Activated
Dilated cardiomyopathy	05414	77	30	0.346418	-3.71374	0.167	0.222722	0.560698	1	Inhibited
Pertussis	05133	69	31	0.0841972	5.50451	0.688	0.222938	0.560698	1	Activated
Transcriptional misregulation in cancer	05202	155	66	0.0585727	0	1	0.224772	0.560698	1	Inhibited
Staphylococcus aureus infection	05150	48	13	0.931549	20.0366	0.063	0.225098	0.560698	1	Activated
HTLV-I infection	05166	245	98	0.119498	11.0981	0.504	0.229443	0.561315	1	Activated
GABAergic synapse	04727	66	27	0.24981	4.19283	0.256	0.239794	0.576347	1	Activated
Arrhythmogenic right ventricular cardiomyopathy (ARVC)	05412	66	28	0.176872	-1.12902	0.383	0.250107	0.59077	1	Inhibited
RNA transport	03013	140	57	0.152163	-1.71368	0.485	0.26615	0.609802	1	Inhibited
Melanoma	05218	60	14	0.988683	33.4741	0.075	0.267067	0.609802	1	Activated
African trypanosomiasis	05143	32	13	0.362664	4.10731	0.21	0.272264	0.611479	1	Activated
Vasopressin-regulated water reabsorption	04962	40	18	0.159861	-3.03368	0.491	0.278234	0.614808	1	Inhibited
Axon guidance	04360	122	38	0.897349	22.1665	0.091	0.286231	0.622438	1	Activated
Allograft rejection	05330	30	13	0.263314	2.05329	0.381	0.331001	0.708549	1	Activated
Epithelial cell signaling in Helicobacter pylori infection	05120	65	27	0.219972	6.35698	0.484	0.344943	0.727034	1	Activated
Shigellosis	05131	59	26	0.131085	2.75371	0.843	0.353913	0.734638	1	Activated
ErbB signaling pathway	04012	86	26	0.898835	35.0847	0.13	0.367708	0.75188	1	Activated
Maturity onset diabetes of the young	04950	16	3	0.963374	-5.38259	0.124	0.373282	0.752054	1	Inhibited
mTOR signaling pathway	04150	61	21	0.659829	5.85732	0.201	0.400559	0.795313	1	Activated
B cell receptor signaling pathway	04662	73	29	0.303705	10.6906	0.501	0.438643	0.858488	1	Activated
Prion diseases	05020	30	14	0.157697	-0.130662	0.988	0.44547	0.859569	1	Inhibited
Autoimmune thyroid disease	05320	32	12	0.505578	2.05329	0.335	0.470113	0.863114	1	Activated
Chagas disease (American trypanosomiasis)	05142	98	40	0.197506	1.90401	0.922	0.492253	0.863114	1	Activated
Endocrine and other factor-regulated calcium reabsorption	04961	43	18	0.266754	-2.35801	0.684	0.492865	0.863114	1	Inhibited
Focal adhesion	04510	192	61	0.914265	-32.1707	0.201	0.495085	0.863114	1	Inhibited
Melanogenesis	04916	88	28	0.833662	-33.6325	0.222	0.497292	0.863114	1	Inhibited
Leishmaniasis	05140	68	27	0.313993	5.2176	0.594	0.499714	0.863114	1	Activated
Dopaminergic synapse	04728	115	44	0.355268	-4.43511	0.526	0.500317	0.863114	1	Inhibited
Adipocytokine signaling pathway	04920	61	22	0.557045	6.98884	0.337	0.501745	0.863114	1	Activated
Gastric acid secretion	04971	62	25	0.290445	-2.44347	0.651	0.504008	0.863114	1	Inhibited
Taste transduction	04742	24	7	0.823058	5.25669	0.265	0.550239	0.89683	1	Activated
SNARE interactions in vesicular transport	04130	36	15	0.30138	0.968702	0.725	0.550833	0.89683	1	Activated
Dorso-ventral axis formation	04320	22	8	0.573525	1.31234	0.385	0.554329	0.89683	1	Activated
Neurotrophin signaling pathway	04722	117	45	0.336916	8.88437	0.659	0.556169	0.89683	1	Activated
Systemic lupus erythematosus	05322	106	34	0.838489	5.39746	0.265	0.556427	0.89683	1	Activated
Pancreatic cancer	05212	69	26	0.443606	8.01691	0.523	0.570965	0.909561	1	Activated
Alcoholism	05034	149	56	0.392031	-9.68471	0.689	0.623663	0.98209	1	Inhibited
Phototransduction	04744	20	4	0.964919	-5.25877	0.294	0.641099	0.998074	1	Inhibited
PPAR signaling pathway	03320	55	22	0.324067	0.425292	0.905	0.653026	0.999926	1	Activated
Toxoplasmosis	05145	121	47	0.302253	-0.203417	0.988	0.659534	0.999926	1	Inhibited
Complement and coagulation cascades	04610	58	22	0.440476	-8.17669	0.7	0.67111	0.999926	1	Inhibited
Retrograde endocannabinoid signaling	04723	74	28	0.427468	-0.482365	0.732	0.676457	0.999926	1	Inhibited
Regulation of autophagy	04140	22	5	0.942853	5.57824	0.334	0.678782	0.999926	1	Activated
Acute myeloid leukemia	05221	57	22	0.40114	1.53514	0.851	0.708271	1	1	Activated
Pancreatic secretion	04972	72	18	0.984482	-1.47123	0.394	0.755231	1	1	Inhibited
Bladder cancer	05219	40	14	0.621236	4.00006	0.669	0.780516	1	1	Activated
Notch signaling pathway	04330	45	15	0.707317	6.6869	0.615	0.797098	1	1	Activated
Regulation of actin cytoskeleton	04810	190	63	0.829889	-14.6961	0.532	0.802461	1	1	Inhibited
Calcium signaling pathway	04020	151	48	0.889404	7.91205	0.5	0.805067	1	1	Activated
Pathways in cancer	05200	296	108	0.481214	-2.4697	0.944	0.812715	1	1	Inhibited
Hedgehog signaling pathway	04340	47	9	0.99666	4.22406	0.467	0.821396	1	1	Activated
Renal cell carcinoma	05211	65	16	0.983412	5.0108	0.476	0.823425	1	1	Activated
GnRH signaling pathway	04912	85	27	0.832992	13.2551	0.564	0.824715	1	1	Activated
Tight junction	04530	110	37	0.744096	-3.67717	0.651	0.835519	1	1	Inhibited
Salivary secretion	04970	66	23	0.635665	-1.31235	0.79	0.848076	1	1	Inhibited
Chronic myeloid leukemia	05220	73	26	0.585316	1.87995	0.858	0.848094	1	1	Activated
Long-term depression	04730	54	11	0.996276	5.4358	0.528	0.863952	1	1	Activated
Fanconi anemia pathway	03460	46	15	0.74303	-1.19122	0.71	0.864925	1	1	Inhibited
Gap junction	04540	76	26	0.681852	-4.34957	0.789	0.871493	1	1	Inhibited
Cholinergic synapse	04725	95	32	0.730014	-5.37702	0.74	0.87287	1	1	Inhibited
Bacterial invasion of epithelial cells	05100	68	19	0.94145	-9.44526	0.579	0.875859	1	1	Inhibited
Morphine addiction	05032	68	24	0.607005	0.562609	0.902	0.877321	1	1	Activated
Aldosterone-regulated sodium reabsorption	04960	34	10	0.842234	1.70593	0.666	0.885236	1	1	Activated
Glutamatergic synapse	04724	93	26	0.963553	3.20411	0.585	0.886819	1	1	Activated
Non-small cell lung cancer	05223	53	16	0.854868	-6.36599	0.677	0.895257	1	1	Inhibited
Glioma	05214	65	17	0.968127	-8.42407	0.611	0.902106	1	1	Inhibited
Endometrial cancer	05213	51	17	0.713325	2.84167	0.832	0.903133	1	1	Activated
Wnt signaling pathway	04310	138	47	0.729099	-2.38942	0.83	0.909105	1	1	Inhibited
Progesterone-mediated oocyte maturation	04914	80	24	0.900035	-2.82366	0.673	0.909392	1	1	Inhibited
Oocyte meiosis	04114	100	34	0.711298	-2.15103	0.877	0.918191	1	1	Inhibited
Amoebiasis	05146	98	31	0.853324	-1.64422	0.784	0.937921	1	1	Inhibited
Asthma	05310	21	7	0.68546	0	1	0.944334	1	1	Inhibited
Basal cell carcinoma	05217	49	12	0.971485	4.55962	0.708	0.945218	1	1	Activated
Malaria	05144	45	15	0.707317	0	1	0.952244	1	1	Inhibited
Leukocyte transendothelial migration	04670	104	25	0.997203	-4.65914	0.766	0.969621	1	1	Inhibited
Phosphatidylinositol signaling system	04070	79	26	0.764859	0	1	0.96989	1	1	Inhibited
Carbohydrate digestion and absorption	04973	32	7	0.9735	0.0419624	0.798	0.973012	1	1	Activated
Vascular smooth muscle contraction	04270	96	24	0.993019	-3.57692	0.789	0.97466	1	1	Inhibited
VEGF signaling pathway	04370	66	16	0.98653	2.93583	0.8	0.976037	1	1	Activated
Fc epsilon RI signaling pathway	04664	67	21	0.830384	0.877414	0.96	0.977878	1	1	Activated
Fc gamma R-mediated phagocytosis	04666	89	28	0.852012	-1.23504	0.937	0.978142	1	1	Inhibited
TGF-beta signaling pathway	04350	79	25	0.831818	0.375336	0.975	0.980899	1	1	Activated
Long-term potentiation	04720	64	18	0.932564	-2.30758	0.895	0.985506	1	1	Inhibited
T cell receptor signaling pathway	04660	102	32	0.86958	0.431802	0.977	0.988073	1	1	Activated
Serotonergic synapse	04726	89	25	0.958307	0.699116	0.903	0.990498	1	1	Activated
Natural killer cell mediated cytotoxicity	04650	107	30	0.970769	3.63982	0.913	0.993278	1	1	Activated
Neuroactive ligand-receptor interaction	04080	166	37	0.999964	0	1	1	1	1	Inhibited

## Sheet: Reactome
ID	Description	setSize	enrichmentScore	NES	pvalue	p.adjust	qvalues
R-HSA-1280215	Cytokine Signaling in Immune system	348	0.448381	2.46612	0.001	0.0244955	0.0163374
R-HSA-449147	Signaling by Interleukins	191	0.386393	2.04915	0.00101729	0.0244955	0.0163374
R-HSA-3247509	Chromatin modifying enzymes	104	0.381082	1.87811	0.00107759	0.0244955	0.0163374
R-HSA-4839726	Chromatin organization	104	0.381082	1.87811	0.00107759	0.0244955	0.0163374
R-HSA-913531	Interferon Signaling	102	0.561647	2.76093	0.00107991	0.0244955	0.0163374
R-HSA-2559583	Cellular Senescence	73	0.445947	2.07676	0.00111235	0.0244955	0.0163374
R-HSA-500792	GPCR ligand binding	67	0.421245	1.92034	0.00113122	0.0244955	0.0163374
R-HSA-3214847	HATs acetylate histones	51	0.517143	2.25394	0.00117096	0.0244955	0.0163374
R-HSA-6785807	Interleukin-4 and Interleukin-13 signaling	50	0.495705	2.15078	0.00117925	0.0244955	0.0163374
R-HSA-373076	Class A/1 (Rhodopsin-like receptors)	48	0.533998	2.28573	0.00119332	0.0244955	0.0163374
R-HSA-2559580	Oxidative Stress Induced Senescence	48	0.500154	2.14087	0.00119332	0.0244955	0.0163374
R-HSA-877300	Interferon gamma signaling	46	0.572948	2.44154	0.00119474	0.0244955	0.0163374
R-HSA-168928	DDX58/IFIH1-mediated induction of interferon-alpha/beta	42	0.572261	2.39623	0.0011976	0.0244955	0.0163374
R-HSA-909733	Interferon alpha/beta signaling	45	0.746212	3.16652	0.00120048	0.0244955	0.0163374
R-HSA-1912422	Pre-NOTCH Expression and Processing	37	0.562743	2.29827	0.00121065	0.0244955	0.0163374
R-HSA-2559582	Senescence-Associated Secretory Phenotype (SASP)	38	0.601841	2.48119	0.00121065	0.0244955	0.0163374
R-HSA-1169410	Antiviral mechanism by IFN-stimulated genes	40	0.58789	2.42698	0.001221	0.0244955	0.0163374
R-HSA-1169408	ISG15 antiviral mechanism	35	0.547426	2.19442	0.00124224	0.0244955	0.0163374
R-HSA-73772	RNA Polymerase I Promoter Escape	32	0.535643	2.08884	0.00124844	0.0244955	0.0163374
R-HSA-5250924	B-WICH complex positively regulates rRNA expression	32	0.536998	2.09413	0.00124844	0.0244955	0.0163374
R-HSA-1474165	Reproduction	34	0.601552	2.38685	0.00125	0.0244955	0.0163374
R-HSA-375276	Peptide ligand-binding receptors	31	0.550817	2.12407	0.00126103	0.0244955	0.0163374
R-HSA-1912408	Pre-NOTCH Transcription and Translation	31	0.607553	2.34286	0.00126103	0.0244955	0.0163374
R-HSA-3214815	HDACs deacetylate histones	30	0.707241	2.71522	0.00126103	0.0244955	0.0163374
R-HSA-9616222	Transcriptional regulation of granulopoiesis	28	0.612901	2.31532	0.00127065	0.0244955	0.0163374
R-HSA-201722	Formation of the beta-catenin:TCF transactivating complex	28	0.57342	2.16617	0.00127065	0.0244955	0.0163374
R-HSA-8936459	RUNX1 regulates genes involved in megakaryocyte differentiation and platelet function	28	0.630443	2.38158	0.00127065	0.0244955	0.0163374
R-HSA-1500620	Meiosis	29	0.599628	2.27988	0.00127226	0.0244955	0.0163374
R-HSA-5625740	RHO GTPases activate PKNs	27	0.611632	2.27561	0.00128535	0.0244955	0.0163374
R-HSA-212300	PRC2 methylates histones and DNA	24	0.674836	2.44277	0.00129702	0.0244955	0.0163374
R-HSA-606279	Deposition of new CENPA-containing nucleosomes at the centromere	23	0.628746	2.23181	0.00131062	0.0244955	0.0163374
R-HSA-774815	Nucleosome assembly	23	0.628746	2.23181	0.00131062	0.0244955	0.0163374
R-HSA-2559586	DNA Damage/Telomere Stress Induced Senescence	23	0.66405	2.35713	0.00131062	0.0244955	0.0163374
R-HSA-1221632	Meiotic synapsis	22	0.652686	2.29546	0.00131752	0.0244955	0.0163374
R-HSA-427389	ERCC6 (CSB) and EHMT2 (G9a) positively regulate rRNA expression	22	0.692871	2.43679	0.00131752	0.0244955	0.0163374
R-HSA-6783783	Interleukin-10 signaling	22	0.713141	2.50808	0.00131752	0.0244955	0.0163374
R-HSA-2299718	Condensation of Prophase Chromosomes	21	0.69287	2.40395	0.00133156	0.0244955	0.0163374
R-HSA-912446	Meiotic recombination	21	0.698041	2.42189	0.00133156	0.0244955	0.0163374
R-HSA-427359	SIRT1 negatively regulates rRNA expression	21	0.732689	2.5421	0.00133156	0.0244955	0.0163374
R-HSA-936440	Negative regulators of DDX58/IFIH1 signaling	21	0.625236	2.16929	0.00133156	0.0244955	0.0163374
R-HSA-110330	Recognition and association of DNA glycosylase with site containing an affected purine	18	0.675271	2.26057	0.00136612	0.0244955	0.0163374
R-HSA-110331	Cleavage of the damaged purine	18	0.675271	2.26057	0.00136612	0.0244955	0.0163374
R-HSA-5625886	Activated PKN1 stimulates transcription of AR (androgen receptor) regulated genes KLK2 and KLK3	18	0.756017	2.53088	0.00136612	0.0244955	0.0163374
R-HSA-73728	RNA Polymerase I Promoter Opening	18	0.761984	2.55086	0.00136612	0.0244955	0.0163374
R-HSA-73927	Depurination	18	0.675271	2.26057	0.00136612	0.0244955	0.0163374
R-HSA-5334118	DNA methylation	17	0.764513	2.52199	0.00138504	0.0244955	0.0163374
R-HSA-3214842	HDMs demethylate histones	17	0.662671	2.18603	0.00138504	0.0244955	0.0163374
R-HSA-171306	Packaging Of Telomere Ends	15	0.768003	2.4455	0.00140056	0.0244955	0.0163374
R-HSA-380108	Chemokine receptors bind chemokines	15	0.850025	2.70667	0.00140056	0.0244955	0.0163374
R-HSA-5617472	Activation of anterior HOX genes in hindbrain development during early embryogenesis	48	0.474515	2.03112	0.00238663	0.0367653	0.0245208
R-HSA-5619507	Activation of HOX genes during differentiation	48	0.474515	2.03112	0.00238663	0.0367653	0.0245208
R-HSA-427413	NoRC negatively regulates rRNA expression	37	0.505383	2.064	0.00242131	0.0367653	0.0245208
R-HSA-5250941	Negative epigenetic regulation of rRNA expression	39	0.491069	2.02332	0.00243013	0.0367653	0.0245208
R-HSA-977225	Amyloid fiber formation	39	0.496118	2.04413	0.00243013	0.0367653	0.0245208
R-HSA-3214858	RMTs methylate histone arginines	28	0.571274	2.15806	0.0025413	0.0367653	0.0245208
R-HSA-5693565	Recruitment and ATM-mediated phosphorylation of repair and signaling proteins at DNA double strand breaks	22	0.598642	2.10539	0.00263505	0.0367653	0.0245208
R-HSA-5693606	DNA Double Strand Break Response	22	0.598642	2.10539	0.00263505	0.0367653	0.0245208
R-HSA-73929	Base-Excision Repair, AP Site Formation	21	0.610306	2.11749	0.00266312	0.0367653	0.0245208
R-HSA-198933	Immunoregulatory interactions between a Lymphoid and a non-Lymphoid cell	19	0.591549	2.01214	0.00269906	0.0367653	0.0245208
R-HSA-5693571	Nonhomologous End-Joining (NHEJ)	20	0.607896	2.08063	0.0027027	0.0367653	0.0245208
R-HSA-110328	Recognition and association of DNA glycosylase with site containing an affected pyrimidine	20	0.632702	2.16553	0.0027027	0.0367653	0.0245208
R-HSA-110329	Cleavage of the damaged pyrimidine	20	0.632702	2.16553	0.0027027	0.0367653	0.0245208
R-HSA-73928	Depyrimidination	20	0.632702	2.16553	0.0027027	0.0367653	0.0245208
R-HSA-933541	TRAF6 mediated IRF7 activation	12	0.708005	2.0954	0.0028777	0.0381058	0.0254148
R-HSA-8854691	Interleukin-20 family signaling	11	0.760197	2.20029	0.00289017	0.0381058	0.0254148
R-HSA-918233	TRAF3-dependent IRF activation pathway	10	0.729668	2.03509	0.00293686	0.0381347	0.025434
R-HSA-212436	Generic Transcription Pathway	493	0.260675	1.44901	0.002997	0.0383348	0.0255675
R-HSA-69186	Lagging Strand Synthesis	11	-0.589486	-2.09369	0.00322581	0.0393173	0.0262228
R-HSA-8851708	Signaling by FGFR2 IIIa TM	11	-0.594466	-2.11138	0.00322581	0.0393173	0.0262228
R-HSA-3000157	Laminin interactions	12	-0.592822	-2.18761	0.00325733	0.0393173	0.0262228
R-HSA-210991	Basigin interactions	12	-0.569244	-2.10061	0.00325733	0.0393173	0.0262228
R-HSA-390918	Peroxisomal lipid metabolism	15	-0.601704	-2.43372	0.00347222	0.0399534	0.026647
R-HSA-389661	Glyoxylate metabolism and glycine degradation	15	-0.637999	-2.58052	0.00347222	0.0399534	0.026647
R-HSA-163841	Gamma carboxylation, hypusine formation and arylsulfatase activation	15	-0.636904	-2.57609	0.00347222	0.0399534	0.026647
R-HSA-499943	Interconversion of nucleotide di- and triphosphates	16	-0.599342	-2.49894	0.0034965	0.0399534	0.026647
R-HSA-8939236	RUNX1 regulates transcription of genes involved in differentiation of HSCs	46	0.45606	1.94344	0.00358423	0.0404169	0.0269562
R-HSA-156590	Glutathione conjugation	19	-0.621946	-2.7716	0.00383142	0.0420965	0.0280764
R-HSA-69190	DNA strand elongation	19	-0.617778	-2.75302	0.00383142	0.0420965	0.0280764
R-HSA-1660662	Glycosphingolipid metabolism	21	-0.592016	-2.72416	0.00398406	0.0428329	0.0285675
R-HSA-72695	Formation of the ternary complex, and subsequently, the 43S complex	22	-0.539252	-2.48848	0.00411523	0.0428329	0.0285675
R-HSA-3299685	Detoxification of Reactive Oxygen Species	22	-0.643386	-2.96903	0.00411523	0.0428329	0.0285675
R-HSA-5689901	Metalloprotease DUBs	15	0.614515	1.95675	0.00420168	0.0428329	0.0285675
R-HSA-77289	Mitochondrial Fatty Acid Beta-Oxidation	24	-0.563634	-2.65022	0.004329	0.0428329	0.0285675
R-HSA-72662	Activation of the mRNA upon binding of the cap-binding complex and eIFs, and subsequent binding to 43S	25	-0.466593	-2.24472	0.00434783	0.0428329	0.0285675
R-HSA-446193	Biosynthesis of the N-glycan precursor (dolichol lipid-linked oligosaccharide, LLO) and transfer to a nascent protein	29	-0.453181	-2.31482	0.00462963	0.0428329	0.0285675
R-HSA-917937	Iron uptake and transport	28	-0.41751	-2.09729	0.00465116	0.0428329	0.0285675
R-HSA-1268020	Mitochondrial protein import	30	-0.439297	-2.29284	0.00478469	0.0428329	0.0285675
R-HSA-5250913	Positive epigenetic regulation of rRNA expression	38	0.480023	1.97897	0.00484262	0.0428329	0.0285675
R-HSA-9033241	Peroxisomal protein import	35	-0.449019	-2.44627	0.00507614	0.0428329	0.0285675
R-HSA-156580	Phase II - Conjugation of compounds	36	-0.499219	-2.73558	0.00543478	0.0428329	0.0285675
R-HSA-68949	Orc1 removal from chromatin	36	-0.393143	-2.15432	0.00543478	0.0428329	0.0285675
R-HSA-1474228	Degradation of the extracellular matrix	39	-0.391999	-2.24676	0.00558659	0.0428329	0.0285675
R-HSA-373760	L1CAM interactions	38	-0.338922	-1.91484	0.00568182	0.0428329	0.0285675
R-HSA-2132295	MHC class II antigen presentation	38	-0.32758	-1.85076	0.00568182	0.0428329	0.0285675
R-HSA-428157	Sphingolipid metabolism	38	-0.406473	-2.29649	0.00568182	0.0428329	0.0285675
R-HSA-6799198	Complex I biogenesis	38	-0.502213	-2.8374	0.00568182	0.0428329	0.0285675
R-HSA-1606322	ZBP1(DAI) mediated induction of type I IFNs	14	0.588494	1.82203	0.00573066	0.0428329	0.0285675
R-HSA-69052	Switching of origins to a post-replicative state	44	-0.382113	-2.29764	0.00574713	0.0428329	0.0285675
R-HSA-72689	Formation of a pool of free 40S subunits	44	-0.476024	-2.86233	0.00574713	0.0428329	0.0285675
R-HSA-156842	Eukaryotic Translation Elongation	44	-0.476615	-2.86588	0.00574713	0.0428329	0.0285675
R-HSA-2408557	Selenocysteine synthesis	44	-0.476718	-2.8665	0.00574713	0.0428329	0.0285675
R-HSA-72764	Eukaryotic Translation Termination	44	-0.457699	-2.75214	0.00574713	0.0428329	0.0285675
R-HSA-9018519	Estrogen-dependent gene expression	59	0.402424	1.79737	0.00577367	0.0428329	0.0285675
R-HSA-975956	Nonsense Mediated Decay (NMD) independent of the Exon Junction Complex (EJC)	43	-0.455695	-2.72006	0.00578035	0.0428329	0.0285675
R-HSA-15869	Metabolism of nucleotides	45	-0.364523	-2.19476	0.00591716	0.0428329	0.0285675
R-HSA-69002	DNA Replication Pre-Initiation	45	-0.350234	-2.10873	0.00591716	0.0428329	0.0285675
R-HSA-381340	Transcriptional regulation of white adipocyte differentiation	42	0.465297	1.94834	0.00598802	0.0428329	0.0285675
R-HSA-70326	Glucose metabolism	42	-0.35863	-2.12348	0.00598802	0.0428329	0.0285675
R-HSA-202733	Cell surface interactions at the vascular wall	42	-0.326739	-1.93465	0.00598802	0.0428329	0.0285675
R-HSA-156902	Peptide chain elongation	42	-0.474822	-2.81146	0.00598802	0.0428329	0.0285675
R-HSA-192823	Viral mRNA Translation	42	-0.45749	-2.70884	0.00598802	0.0428329	0.0285675
R-HSA-73864	RNA Polymerase I Transcription	38	0.473646	1.95269	0.00605327	0.0428329	0.0285675
R-HSA-73854	RNA Polymerase I Promoter Clearance	38	0.473646	1.95269	0.00605327	0.0428329	0.0285675
R-HSA-5578749	Transcriptional regulation by small RNAs	37	0.482387	1.97009	0.00605327	0.0428329	0.0285675
R-HSA-5368286	Mitochondrial translation initiation	46	-0.429389	-2.59097	0.00606061	0.0428329	0.0285675
R-HSA-5628897	TP53 Regulates Metabolic Genes	48	-0.37677	-2.29144	0.00609756	0.0428329	0.0285675
R-HSA-3781865	Diseases of glycosylation	47	-0.328943	-2.00251	0.00609756	0.0428329	0.0285675
R-HSA-5389840	Mitochondrial translation elongation	48	-0.434785	-2.64428	0.00609756	0.0428329	0.0285675
R-HSA-5419276	Mitochondrial translation termination	47	-0.416829	-2.53754	0.00609756	0.0428329	0.0285675
R-HSA-156827	L13a-mediated translational silencing of Ceruloplasmin expression	47	-0.436823	-2.65926	0.00609756	0.0428329	0.0285675
R-HSA-72706	GTP hydrolysis and joining of the 60S ribosomal subunit	48	-0.420766	-2.55902	0.00609756	0.0428329	0.0285675
R-HSA-5668914	Diseases of metabolism	47	-0.38898	-2.368	0.00609756	0.0428329	0.0285675
R-HSA-5368287	Mitochondrial translation	49	-0.422631	-2.59343	0.00621118	0.043139	0.0287717
R-HSA-157579	Telomere Maintenance	32	0.474789	1.85153	0.0062422	0.043139	0.0287717
R-HSA-69473	G2/M DNA damage checkpoint	30	0.462464	1.77548	0.00630517	0.043139	0.0287717
R-HSA-189445	Metabolism of porphyrins	11	-0.553683	-1.96653	0.00645161	0.043139	0.0287717
R-HSA-71336	Pentose phosphate pathway	11	-0.551163	-1.95758	0.00645161	0.043139	0.0287717
R-HSA-72613	Eukaryotic Translation Initiation	50	-0.425989	-2.6089	0.00649351	0.043139	0.0287717
R-HSA-72737	Cap-dependent Translation Initiation	50	-0.425989	-2.6089	0.00649351	0.043139	0.0287717
R-HSA-114608	Platelet degranulation	51	-0.296008	-1.84148	0.00675676	0.0438677	0.0292577
R-HSA-927802	Nonsense-Mediated Decay (NMD)	51	-0.305258	-1.89903	0.00675676	0.0438677	0.0292577
R-HSA-975957	Nonsense Mediated Decay (NMD) enhanced by the Exon Junction Complex (EJC)	51	-0.305258	-1.89903	0.00675676	0.0438677	0.0292577
R-HSA-75105	Fatty acyl-CoA biosynthesis	15	-0.547603	-2.21489	0.00694444	0.0447473	0.0298443
R-HSA-445355	Smooth Muscle Contraction	17	-0.514609	-2.18439	0.00714286	0.0453439	0.0302423
R-HSA-71403	Citric acid cycle (TCA cycle)	17	-0.523304	-2.2213	0.00714286	0.0453439	0.0302423
R-HSA-68877	Mitotic Prometaphase	59	-0.294357	-1.94993	0.00735294	0.0453439	0.0302423
R-HSA-69239	Synthesis of DNA	59	-0.423326	-2.80426	0.00735294	0.0453439	0.0302423
R-HSA-1799339	SRP-dependent cotranslational protein targeting to membrane	57	-0.469831	-3.07943	0.00735294	0.0453439	0.0302423
R-HSA-70263	Gluconeogenesis	18	-0.517262	-2.2479	0.00740741	0.0453439	0.0302423
R-HSA-176187	Activation of ATR in response to replication stress	18	-0.502628	-2.1843	0.00740741	0.0453439	0.0302423
R-HSA-162909	Host Interactions of HIV factors	56	-0.285584	-1.82657	0.00763359	0.0457481	0.0305119
R-HSA-6806667	Metabolism of fat-soluble vitamins	20	-0.491418	-2.25639	0.00763359	0.0457481	0.0305119
R-HSA-2408522	Selenoamino acid metabolism	56	-0.489975	-3.13385	0.00763359	0.0457481	0.0305119
R-HSA-69306	DNA Replication	61	-0.379808	-2.53551	0.00769231	0.0457799	0.0305331
R-HSA-379724	tRNA Aminoacylation	21	-0.494953	-2.27752	0.00796813	0.0470944	0.0314098
R-HSA-212165	Epigenetic regulation of gene expression	58	0.385099	1.72204	0.00804598	0.0472288	0.0314994
R-HSA-199977	ER to Golgi Anterograde Transport	65	-0.250899	-1.7421	0.00833333	0.0482545	0.0321835
R-HSA-168273	Influenza Viral RNA Transcription and Replication	65	-0.379131	-2.63246	0.00833333	0.0482545	0.0321835
R-HSA-211000	Gene Silencing by RNA	45	0.440484	1.86918	0.00840336	0.0483334	0.0322361
R-HSA-2467813	Separation of Sister Chromatids	67	-0.275518	-1.93488	0.00847458	0.0484181	0.0322926
R-HSA-72649	Translation initiation complex formation	24	-0.462154	-2.17306	0.00865801	0.0486158	0.0324245
R-HSA-5693607	Processing of DNA double-strand break ends	33	0.445848	1.75154	0.00877193	0.0486158	0.0324245
R-HSA-69206	G1/S Transition	70	-0.283618	-1.98096	0.00884956	0.0486158	0.0324245
R-HSA-5617833	Cilium Assembly	70	-0.320018	-2.23519	0.00884956	0.0486158	0.0324245
R-HSA-163200	Respiratory electron transport, ATP synthesis by chemiosmotic coupling, and heat production by uncoupling proteins.	70	-0.495947	-3.46398	0.00884956	0.0486158	0.0324245
R-HSA-168255	Influenza Life Cycle	70	-0.371869	-2.59735	0.00884956	0.0486158	0.0324245
R-HSA-611105	Respiratory electron transport	69	-0.492965	-3.45015	0.00909091	0.0493096	0.0328872
R-HSA-168254	Influenza Infection	75	-0.282584	-2.0068	0.00909091	0.0493096	0.0328872
R-HSA-166016	Toll Like Receptor 4 (TLR4) Cascade	58	0.381464	1.70579	0.0091954	0.0495376	0.0330392
R-HSA-196854	Metabolism of vitamins and cofactors	77	-0.321278	-2.30843	0.00925926	0.0495376	0.0330392
R-HSA-202131	Metabolism of nitric oxide: eNOS activation and regulation	10	-0.55324	-1.86678	0.00934579	0.0495376	0.0330392
R-HSA-174417	Telomere C-strand (Lagging Strand) Synthesis	13	-0.576121	-2.21797	0.00949367	0.0495376	0.0330392
R-HSA-9010553	Regulation of expression of SLITs and ROBOs	74	-0.321643	-2.24048	0.00952381	0.0495376	0.0330392
R-HSA-6791226	Major pathway of rRNA processing in the nucleolus and cytosol	73	-0.284204	-1.98759	0.00970874	0.0495376	0.0330392
R-HSA-400253	Circadian Clock	39	0.44345	1.82712	0.00972053	0.0495376	0.0330392
R-HSA-191273	Cholesterol biosynthesis	12	-0.557255	-2.05636	0.00977199	0.0495376	0.0330392
R-HSA-453279	Mitotic G1-G1/S phases	78	-0.261953	-1.86147	0.00980392	0.0495376	0.0330392
R-HSA-8868773	rRNA processing in the nucleus and cytosol	78	-0.286059	-2.03276	0.00980392	0.0495376	0.0330392
R-HSA-68867	Assembly of the pre-replicative complex	34	-0.364824	-1.97913	0.00990099	0.0495376	0.0330392
R-HSA-211859	Biological oxidations	79	-0.410213	-2.91388	0.01	0.0495376	0.0330392
R-HSA-69242	S Phase	79	-0.287408	-2.04156	0.01	0.0495376	0.0330392
R-HSA-8978868	Fatty acid metabolism	85	-0.440686	-3.28632	0.01	0.0495376	0.0330392
R-HSA-376176	Signaling by ROBO receptors	85	-0.295513	-2.20372	0.01	0.0495376	0.0330392
R-HSA-9609507	Protein localization	80	-0.383362	-2.74658	0.010101	0.0497172	0.033159
R-HSA-5620912	Anchoring of the basal body to the plasma membrane	35	-0.357051	-1.94522	0.0101523	0.0497172	0.033159
R-HSA-72312	rRNA processing	82	-0.27282	-1.97865	0.0103093	0.0501992	0.0334805
R-HSA-975634	Retinoid metabolism and transport	17	-0.504397	-2.14104	0.0107143	0.0515851	0.0344048
R-HSA-180786	Extension of Telomeres	17	-0.474644	-2.01475	0.0107143	0.0515851	0.0344048
R-HSA-211945	Phase I - Functionalization of compounds	40	-0.32086	-1.88346	0.010929	0.0523247	0.0348981
R-HSA-68962	Activation of the pre-replicative complex	20	-0.434981	-1.99725	0.0114504	0.0538372	0.0359069
R-HSA-1474244	Extracellular matrix organization	89	-0.272233	-2.05749	0.0114943	0.0538372	0.0359069
R-HSA-3214841	PKMTs methylate histone lysines	27	0.463619	1.72492	0.0115681	0.0538372	0.0359069
R-HSA-5260271	Diseases of Immune System	13	0.57975	1.75319	0.0116618	0.0538372	0.0359069
R-HSA-5602358	Diseases associated with the TLR signaling cascade	13	0.57975	1.75319	0.0116618	0.0538372	0.0359069
R-HSA-1810476	RIP-mediated NFkB activation via ZBP1	13	0.57752	1.74645	0.0116618	0.0538372	0.0359069
R-HSA-8856688	Golgi-to-ER retrograde transport	41	-0.315935	-1.8542	0.0116959	0.0538372	0.0359069
R-HSA-6783589	Interleukin-6 family signaling	10	0.64618	1.80224	0.0117474	0.0538372	0.0359069
R-HSA-73886	Chromosome Maintenance	40	0.429484	1.77303	0.01221	0.0556595	0.0371223
R-HSA-72702	Ribosomal scanning and start codon recognition	25	-0.432962	-2.08293	0.0130435	0.0590899	0.0394102
R-HSA-8939211	ESR-mediated signaling	90	0.331385	1.59913	0.0131004	0.0590899	0.0394102
R-HSA-1428517	The citric acid (TCA) cycle and respiratory electron transport	103	-0.446491	-3.45648	0.0135135	0.0604138	0.0402932
R-HSA-76005	Response to elevated platelet cytosolic Ca2+	52	-0.289744	-1.8055	0.0136054	0.0604138	0.0402932
R-HSA-168898	Toll-like Receptor Cascades	65	0.360148	1.63523	0.0136054	0.0604138	0.0402932
R-HSA-1614635	Sulfur amino acid metabolism	15	-0.465831	-1.88415	0.0138889	0.0613545	0.0409206
R-HSA-157118	Signaling by NOTCH	88	0.329362	1.57831	0.01427	0.062715	0.041828
R-HSA-437239	Recycling pathway of L1	19	-0.43467	-1.93703	0.0153257	0.0670107	0.044693
R-HSA-5688426	Deubiquitination	125	0.301557	1.5398	0.0156413	0.0680436	0.0453819
R-HSA-193368	Synthesis of bile acids and bile salts via 7alpha-hydroxycholesterol	12	-0.527283	-1.94576	0.0162866	0.069837	0.046578
R-HSA-379716	Cytosolic tRNA aminoacylation	12	-0.516931	-1.90756	0.0162866	0.069837	0.046578
R-HSA-68875	Mitotic Prophase	53	0.375877	1.65188	0.016298	0.069837	0.046578
R-HSA-73933	Resolution of Abasic Sites (AP sites)	22	-0.429654	-1.98272	0.0164609	0.0701841	0.0468095
R-HSA-71406	Pyruvate metabolism and Citric Acid (TCA) cycle	37	-0.327939	-1.80309	0.0170455	0.0723166	0.0482318
R-HSA-5663220	RHO GTPases Activate Formins	43	-0.279049	-1.66566	0.017341	0.0728494	0.0485871
R-HSA-9617828	FOXO-mediated transcription of cell cycle genes	11	0.586685	1.69808	0.017341	0.0728494	0.0485871
R-HSA-8950505	Gene and protein expression by JAK-STAT signaling after Interleukin-12 stimulation	16	-0.453562	-1.89112	0.0174825	0.0730855	0.0487446
R-HSA-425397	Transport of vitamins, nucleosides, and related molecules	17	-0.42061	-1.78539	0.0178571	0.0742892	0.0495474
R-HSA-2555396	Mitotic Metaphase and Anaphase	76	-0.239967	-1.7073	0.0181818	0.0749126	0.0499632
R-HSA-68882	Mitotic Anaphase	75	-0.248278	-1.76317	0.0181818	0.0749126	0.0499632
R-HSA-5627123	RHO GTPases activate PAKs	10	-0.535869	-1.80817	0.0186916	0.0766445	0.0511183
R-HSA-380320	Recruitment of NuMA to mitotic centrosomes	30	-0.339125	-1.77001	0.0191388	0.0777342	0.0518451
R-HSA-5387390	Hh mutants abrogate ligand secretion	30	-0.360799	-1.88313	0.0191388	0.0777342	0.0518451
R-HSA-5689880	Ub-specific processing proteases	92	0.316928	1.53104	0.0196721	0.0786239	0.0524384
R-HSA-73887	Death Receptor Signalling	54	0.365296	1.61244	0.0197216	0.0786239	0.0524384
R-HSA-5626467	RHO GTPases activate IQGAPs	14	-0.452248	-1.79077	0.0197368	0.0786239	0.0524384
R-HSA-5696397	Gap-filling DNA repair synthesis and ligation in GG-NER	14	-0.450384	-1.78339	0.0197368	0.0786239	0.0524384
R-HSA-8878171	Transcriptional regulation by RUNX1	82	0.331034	1.57	0.0198895	0.0786239	0.0524384
R-HSA-1793185	Chondroitin sulfate/dermatan sulfate metabolism	21	-0.411418	-1.89314	0.0199203	0.0786239	0.0524384
R-HSA-71387	Metabolism of carbohydrates	124	-0.309742	-2.47869	0.02	0.0786239	0.0524384
R-HSA-5610787	Hedgehog 'off' state	52	-0.250328	-1.55988	0.0204082	0.0798621	0.0532643
R-HSA-110373	Resolution of AP sites via the multiple-nucleotide patch replacement pathway	16	-0.431913	-1.80085	0.020979	0.0812707	0.0542038
R-HSA-190828	Gap junction trafficking	16	-0.427157	-1.78102	0.020979	0.0812707	0.0542038
R-HSA-168164	Toll Like Receptor 3 (TLR3) Cascade	52	0.366374	1.60153	0.0210526	0.0812707	0.0542038
R-HSA-2219528	PI3K/AKT Signaling in Cancer	33	0.408266	1.60389	0.0213033	0.0818695	0.0546031
R-HSA-3371453	Regulation of HSF1-mediated heat shock response	27	-0.364111	-1.82525	0.0223214	0.0846436	0.0564534
R-HSA-380270	Recruitment of mitotic centrosome proteins and complexes	27	-0.359742	-1.80334	0.0223214	0.0846436	0.0564534
R-HSA-380287	Centrosome maturation	27	-0.359742	-1.80334	0.0223214	0.0846436	0.0564534
R-HSA-6807878	COPI-mediated anterograde transport	43	-0.26997	-1.61146	0.0231214	0.0872909	0.0582189
R-HSA-372790	Signaling by GPCR	164	0.278408	1.45613	0.0235656	0.0885776	0.0590771
R-HSA-446203	Asparagine N-linked glycosylation	129	-0.306523	-2.50975	0.0238095	0.0891038	0.059428
R-HSA-196849	Metabolism of water-soluble vitamins and cofactors	48	-0.266462	-1.62057	0.0243902	0.0908031	0.0605614
R-HSA-6811436	COPI-independent Golgi-to-ER retrograde traffic	16	-0.402329	-1.6775	0.0244755	0.0908031	0.0605614
R-HSA-113510	E2F mediated regulation of DNA replication	10	-0.514678	-1.73667	0.0249221	0.0920614	0.0614007
R-HSA-432720	Lysosome Vesicle Biogenesis	13	-0.444572	-1.71153	0.0253165	0.0923243	0.061576
R-HSA-70895	Branched-chain amino acid catabolism	13	-0.443135	-1.706	0.0253165	0.0923243	0.061576
R-HSA-6803529	FGFR2 alternative splicing	13	-0.452082	-1.74044	0.0253165	0.0923243	0.061576
R-HSA-8964038	LDL clearance	12	-0.495917	-1.83002	0.0260586	0.0943313	0.0629146
R-HSA-9614085	FOXO-mediated transcription	35	0.394031	1.57952	0.026087	0.0943313	0.0629146
R-HSA-948021	Transport to the Golgi and subsequent modification	70	-0.249441	-1.74224	0.0265487	0.0955975	0.0637591
R-HSA-1852241	Organelle biogenesis and maintenance	104	-0.189083	-1.46787	0.027027	0.0969128	0.0646363
R-HSA-72766	Translation	142	-0.439331	-3.79172	0.0277778	0.0983555	0.0655986
R-HSA-5362768	Hh mutants that don't undergo autocatalytic processing are degraded by ERAD	29	-0.349141	-1.78339	0.0277778	0.0983555	0.0655986
R-HSA-446219	Synthesis of substrates in N-glycan biosythesis	21	-0.401632	-1.84811	0.0278884	0.0983555	0.0655986
R-HSA-168325	Viral Messenger RNA Synthesis	21	-0.394883	-1.81705	0.0278884	0.0983555	0.0655986
R-HSA-203927	MicroRNA (miRNA) biogenesis	11	-0.49419	-1.75523	0.0290323	0.101637	0.0677869
R-HSA-166166	MyD88-independent TLR4 cascade	51	0.36115	1.57405	0.029274	0.101637	0.0677869
R-HSA-937061	TRIF(TICAM1)-mediated TLR4 signaling	51	0.36115	1.57405	0.029274	0.101637	0.0677869
R-HSA-379726	Mitochondrial tRNA aminoacylation	12	-0.494179	-1.8236	0.029316	0.101637	0.0677869
R-HSA-70171	Glycolysis	33	-0.305714	-1.65271	0.0294118	0.101637	0.0677869
R-HSA-69017	CDK-mediated phosphorylation and removal of Cdc6	34	-0.304442	-1.65157	0.029703	0.102171	0.068143
R-HSA-388396	GPCR downstream signalling	153	0.280997	1.45776	0.0298047	0.102171	0.068143
R-HSA-72165	mRNA Splicing - Minor Pathway	25	-0.364021	-1.75126	0.0304348	0.103827	0.0692477
R-HSA-3371497	HSP90 chaperone cycle for steroid hormone receptors (SHR)	20	-0.396791	-1.8219	0.0305344	0.103827	0.0692477
R-HSA-1650814	Collagen biosynthesis and modifying enzymes	19	-0.378229	-1.68551	0.0306513	0.103827	0.0692477
R-HSA-1368108	BMAL1:CLOCK,NPAS2 activates circadian gene expression	14	0.523821	1.62179	0.0315186	0.106344	0.0709267
R-HSA-5651801	PCNA-Dependent Long Patch Base Excision Repair	12	-0.470901	-1.7377	0.0325733	0.109163	0.0728064
R-HSA-2500257	Resolution of Sister Chromatid Cohesion	36	-0.295792	-1.62086	0.0326087	0.109163	0.0728064
R-HSA-5620924	Intraflagellar transport	23	-0.378395	-1.77263	0.0334728	0.110824	0.0739143
R-HSA-69618	Mitotic Spindle Checkpoint	31	-0.311224	-1.66244	0.0334928	0.110824	0.0739143
R-HSA-5678895	Defective CFTR causes cystic fibrosis	30	-0.319324	-1.66666	0.0334928	0.110824	0.0739143
R-HSA-73884	Base Excision Repair	38	0.383214	1.57986	0.0338983	0.111511	0.0743727
R-HSA-381426	Regulation of Insulin-like Growth Factor (IGF) transport and uptake by Insulin-like Growth Factor Binding Proteins (IGFBPs)	52	-0.242552	-1.51143	0.0340136	0.111511	0.0743727
R-HSA-933542	TRAF6 mediated NF-kB activation	18	0.481953	1.61341	0.034153	0.111511	0.0743727
R-HSA-6811434	COPI-dependent Golgi-to-ER retrograde traffic	33	-0.288591	-1.56014	0.0343137	0.111511	0.0743727
R-HSA-6809371	Formation of the cornified envelope	20	-0.376921	-1.73066	0.0343511	0.111511	0.0743727
R-HSA-2142753	Arachidonic acid metabolism	25	-0.33079	-1.59139	0.0347826	0.112202	0.0748336
R-HSA-199992	trans-Golgi Network Vesicle Budding	32	-0.304728	-1.62365	0.0348259	0.112202	0.0748336
R-HSA-168643	Nucleotide-binding domain, leucine rich repeat containing receptor (NLR) signaling pathways	31	0.402297	1.55135	0.035309	0.113332	0.0755875
R-HSA-5619084	ABC transporter disorders	35	-0.294279	-1.60324	0.035533	0.11336	0.0756057
R-HSA-71291	Metabolism of amino acids and derivatives	159	-0.36807	-3.23979	0.0357143	0.11336	0.0756057
R-HSA-157858	Gap junction trafficking and regulation	17	-0.383329	-1.62714	0.0357143	0.11336	0.0756057
R-HSA-2219530	Constitutive Signaling by Aberrant PI3K in Cancer	18	0.478966	1.60341	0.0368852	0.115915	0.0773096
R-HSA-6805567	Keratinization	22	-0.364204	-1.68069	0.037037	0.115915	0.0773096
R-HSA-8854518	AURKA Activation by TPX2	23	-0.353708	-1.65698	0.0376569	0.115915	0.0773096
R-HSA-5693567	HDR through Homologous Recombination (HRR) or Single Strand Annealing (SSA)	39	0.383714	1.58099	0.0376671	0.115915	0.0773096
R-HSA-5357956	TNFR1-induced NFkappaB signaling pathway	20	0.472447	1.61703	0.0378378	0.115915	0.0773096
R-HSA-389960	Formation of tubulin folding intermediates by CCT/TriC	13	-0.424434	-1.634	0.0379747	0.115915	0.0773096
R-HSA-8852276	The role of GTSE1 in G2/M progression after G2 checkpoint	36	-0.290131	-1.58984	0.0380435	0.115915	0.0773096
R-HSA-8957322	Metabolism of steroids	56	-0.231775	-1.48241	0.0381679	0.115915	0.0773096
R-HSA-4615885	SUMOylation of DNA replication proteins	15	-0.394471	-1.59552	0.0381944	0.115915	0.0773096
R-HSA-176033	Interactions of Vpr with host cellular proteins	15	-0.394471	-1.59552	0.0381944	0.115915	0.0773096
R-HSA-174184	Cdc20:Phospho-APC/C mediated degradation of Cyclin A	31	-0.297032	-1.58664	0.0382775	0.115915	0.0773096
R-HSA-176409	APC/C:Cdc20 mediated degradation of mitotic proteins	31	-0.297032	-1.58664	0.0382775	0.115915	0.0773096
R-HSA-179419	APC:Cdc20 mediated degradation of cell cycle proteins prior to satisfation of the cell cycle checkpoint	31	-0.297032	-1.58664	0.0382775	0.115915	0.0773096
R-HSA-4086400	PCP/CE pathway	39	-0.269324	-1.54364	0.0391061	0.118007	0.0787051
R-HSA-164952	The role of Nef in HIV-1 replication and disease pathogenesis	10	-0.473682	-1.59834	0.0404984	0.121354	0.0809373
R-HSA-8949215	Mitochondrial calcium ion transport	10	-0.471769	-1.59188	0.0404984	0.121354	0.0809373
R-HSA-532668	N-glycan trimming in the ER and Calnexin/Calreticulin cycle	22	-0.351749	-1.62322	0.0411523	0.122883	0.0819574
R-HSA-383280	Nuclear Receptor transcription pathway	19	0.475435	1.61718	0.0418354	0.124133	0.0827909
R-HSA-68827	CDT1 association with the CDC6:ORC:origin complex	28	-0.322263	-1.61883	0.0418605	0.124133	0.0827909
R-HSA-382556	ABC-family proteins mediated transport	48	-0.24828	-1.50999	0.0426829	0.125938	0.0839949
R-HSA-5579029	Metabolic disorders of biological oxidation enzymes	14	-0.395951	-1.56785	0.0427632	0.125938	0.0839949
R-HSA-174154	APC/C:Cdc20 mediated degradation of Securin	30	-0.308911	-1.61231	0.0430622	0.126385	0.0842926
R-HSA-201681	TCF dependent signaling in response to WNT	83	0.311762	1.47926	0.0432373	0.126465	0.0843464
R-HSA-166058	MyD88:MAL(TIRAP) cascade initiated on plasma membrane	47	0.357004	1.52515	0.0441527	0.127404	0.0849723
R-HSA-168179	Toll Like Receptor TLR1:TLR2 Cascade	47	0.357004	1.52515	0.0441527	0.127404	0.0849723
R-HSA-168188	Toll Like Receptor TLR6:TLR2 Cascade	47	0.357004	1.52515	0.0441527	0.127404	0.0849723
R-HSA-181438	Toll Like Receptor 2 (TLR2) Cascade	47	0.357004	1.52515	0.0441527	0.127404	0.0849723
R-HSA-3371556	Cellular response to heat stress	37	-0.281519	-1.54786	0.0454545	0.130707	0.0871756
R-HSA-167242	Abortive elongation of HIV-1 transcript in the absence of Tat	12	-0.446871	-1.64903	0.0456026	0.130707	0.0871756
R-HSA-381070	IRE1alpha activates chaperones	29	-0.308788	-1.57726	0.0462963	0.13112	0.0874509
R-HSA-381038	XBP1(S) activates chaperone genes	28	-0.305114	-1.53269	0.0465116	0.13112	0.0874509
R-HSA-5610780	Degradation of GLI1 by the proteasome	28	-0.317276	-1.59378	0.0465116	0.13112	0.0874509
R-HSA-5610783	Degradation of GLI2 by the proteasome	28	-0.316576	-1.59027	0.0465116	0.13112	0.0874509
R-HSA-1445148	Translocation of SLC2A4 (GLUT4) to the plasma membrane	28	-0.293258	-1.47313	0.0465116	0.13112	0.0874509
R-HSA-187577	SCF(Skp2)-mediated degradation of p27/p21	31	-0.295154	-1.5766	0.0478469	0.134003	0.0893734
R-HSA-174084	Autodegradation of Cdh1 by Cdh1:APC/C	30	-0.305582	-1.59494	0.0478469	0.134003	0.0893734
R-HSA-5601884	PIWI-interacting RNA (piRNA) biogenesis	12	-0.43644	-1.61054	0.0488599	0.135942	0.090667
R-HSA-351202	Metabolism of polyamines	27	-0.318159	-1.59489	0.0491071	0.135942	0.090667
R-HSA-450408	AUF1 (hnRNP D0) binds and destabilizes mRNA	27	-0.314226	-1.57518	0.0491071	0.135942	0.090667
R-HSA-380259	Loss of Nlp from mitotic centrosomes	22	-0.341396	-1.57544	0.0493827	0.135942	0.090667
R-HSA-380284	Loss of proteins required for interphase microtubule organization from the centrosome	22	-0.341396	-1.57544	0.0493827	0.135942	0.090667
R-HSA-8957275	Post-translational protein phosphorylation	49	-0.240283	-1.47447	0.0496894	0.135942	0.090667
R-HSA-5358346	Hedgehog ligand biogenesis	32	-0.285112	-1.51914	0.0497512	0.135942	0.090667
R-HSA-901042	Calnexin/calreticulin cycle	19	-0.339032	-1.51084	0.0498084	0.135942	0.090667
R-HSA-9006931	Signaling by Nuclear Receptors	121	0.279673	1.41554	0.0507937	0.138191	0.0921669
R-HSA-1971475	A tetrasaccharide linker sequence is required for GAG synthesis	11	-0.444023	-1.57705	0.0516129	0.139976	0.0933571
R-HSA-350562	Regulation of ornithine decarboxylase (ODC)	24	-0.315331	-1.48269	0.0519481	0.14044	0.0936669
R-HSA-180534	Vpu mediated degradation of CD4	25	-0.314781	-1.51437	0.0521739	0.140607	0.0937783
R-HSA-109582	Hemostasis	191	-0.152323	-1.36012	0.0526316	0.140954	0.0940097
R-HSA-6782210	Gap-filling DNA repair synthesis and ligation in TC-NER	31	-0.286379	-1.52973	0.0526316	0.140954	0.0940097
R-HSA-5609975	Diseases associated with glycosylation precursor biosynthesis	10	-0.457651	-1.54424	0.0529595	0.14139	0.0943007
R-HSA-174178	APC/C:Cdh1 mediated degradation of Cdc20 and other APC/C:Cdh1 targeted proteins in late mitosis/early G1	33	-0.27632	-1.49381	0.0539216	0.143512	0.0957156
R-HSA-6798695	Neutrophil degranulation	190	-0.300321	-2.64635	0.0555556	0.146512	0.0977169
R-HSA-5663084	Diseases of carbohydrate metabolism	21	-0.33994	-1.56423	0.0557769	0.146512	0.0977169
R-HSA-180746	Nuclear import of Rev protein	14	-0.394403	-1.56172	0.0559211	0.146512	0.0977169
R-HSA-3301854	Nuclear Pore Complex (NPC) Disassembly	14	-0.394403	-1.56172	0.0559211	0.146512	0.0977169
R-HSA-194068	Bile acid and bile salt metabolism	16	-0.368068	-1.53465	0.0559441	0.146512	0.0977169
R-HSA-8978934	Metabolism of cofactors	10	-0.454165	-1.53248	0.0560748	0.146512	0.0977169
R-HSA-2187338	Visual phototransduction	30	-0.29013	-1.51429	0.0574163	0.148658	0.0991478
R-HSA-6782135	Dual incision in TC-NER	30	-0.292887	-1.52868	0.0574163	0.148658	0.0991478
R-HSA-174824	Plasma lipoprotein assembly, remodeling, and clearance	30	-0.286499	-1.49534	0.0574163	0.148658	0.0991478
R-HSA-211897	Cytochrome P450 - arranged by substrate type	19	0.449548	1.52913	0.0580297	0.149794	0.0999053
R-HSA-192105	Synthesis of bile acids and bile salts	15	-0.374825	-1.51606	0.0590278	0.151912	0.101318
R-HSA-2029482	Regulation of actin dynamics for phagocytic cup formation	21	-0.33137	-1.5248	0.059761	0.153339	0.10227
R-HSA-9613829	Chaperone Mediated Autophagy	11	-0.433708	-1.54041	0.0612903	0.156275	0.104228
R-HSA-6811440	Retrograde transport at the Trans-Golgi-Network	19	-0.330202	-1.47149	0.0613027	0.156275	0.104228
R-HSA-9615017	FOXO-mediated transcription of oxidative stress, metabolic and neuronal genes	16	0.465838	1.50439	0.0614525	0.156275	0.104228
R-HSA-4085001	Sialic acid metabolism	10	-0.435126	-1.46824	0.0623053	0.156859	0.104618
R-HSA-6781827	Transcription-Coupled Nucleotide Excision Repair (TC-NER)	37	-0.263124	-1.44672	0.0625	0.156859	0.104618
R-HSA-75815	Ubiquitin-dependent degradation of Cyclin D	26	-0.302561	-1.48611	0.0627803	0.156859	0.104618
R-HSA-69601	Ubiquitin Mediated Degradation of Phosphorylated Cdc25A	26	-0.302365	-1.48515	0.0627803	0.156859	0.104618
R-HSA-69610	p53-Independent DNA Damage Response	26	-0.302365	-1.48515	0.0627803	0.156859	0.104618
R-HSA-69613	p53-Independent G1/S DNA damage checkpoint	26	-0.302365	-1.48515	0.0627803	0.156859	0.104618
R-HSA-2024096	HS-GAG degradation	11	-0.428034	-1.52026	0.0645161	0.160373	0.106961
R-HSA-169911	Regulation of Apoptosis	24	-0.304145	-1.4301	0.0649351	0.160373	0.106961
R-HSA-180585	Vif-mediated degradation of APOBEC3G	24	-0.304145	-1.4301	0.0649351	0.160373	0.106961
R-HSA-211733	Regulation of activated PAK-2p34 by proteasome mediated degradation	24	-0.304145	-1.4301	0.0649351	0.160373	0.106961
R-HSA-6811558	PI5P, PP2A and IER3 Regulate PI3K/AKT Signaling	31	0.382297	1.47422	0.0655738	0.161485	0.107703
R-HSA-389977	Post-chaperonin tubulin folding pathway	13	-0.405002	-1.55919	0.0664557	0.163188	0.108839
R-HSA-168181	Toll Like Receptor 7/8 (TLR7/8) Cascade	46	0.342087	1.45776	0.0669056	0.163356	0.108951
R-HSA-975155	MyD88 dependent cascade initiated on endosome	46	0.342087	1.45776	0.0669056	0.163356	0.108951
R-HSA-168638	NOD1/2 Signaling Pathway	22	0.424815	1.49405	0.0671937	0.163594	0.109109
R-HSA-389958	Cooperation of Prefoldin and TriC/CCT in actin and tubulin folding	17	-0.33773	-1.43358	0.0678571	0.164527	0.109732
R-HSA-69275	G2/M Transition	73	-0.214272	-1.49852	0.0679612	0.164527	0.109732
R-HSA-349425	Autodegradation of the E3 ubiquitin ligase COP1	25	-0.300318	-1.44479	0.0695652	0.167628	0.1118
R-HSA-2565942	Regulation of PLK1 Activity at G2/M Transition	28	-0.285969	-1.43652	0.0697674	0.167628	0.1118
R-HSA-75893	TNF signaling	22	0.423042	1.48782	0.0698287	0.167628	0.1118
R-HSA-422475	Axon guidance	199	-0.183824	-1.59388	0.0714286	0.170513	0.113724
R-HSA-9604323	Negative regulation of NOTCH4 signaling	27	-0.285387	-1.43061	0.0714286	0.170513	0.113724
R-HSA-186712	Regulation of beta-cell development	11	0.52611	1.52276	0.0722543	0.171204	0.114185
R-HSA-5693538	Homology Directed Repair	43	0.348655	1.46349	0.0723764	0.171204	0.114185
R-HSA-191859	snRNP Assembly	20	-0.317768	-1.45906	0.0725191	0.171204	0.114185
R-HSA-194441	Metabolism of non-coding RNA	20	-0.317768	-1.45906	0.0725191	0.171204	0.114185
R-HSA-5358351	Signaling by Hedgehog	69	-0.216991	-1.51867	0.0727273	0.171204	0.114185
R-HSA-5694530	Cargo concentration in the ER	15	-0.369693	-1.4953	0.0729167	0.171204	0.114185
R-HSA-5689896	Ovarian tumor domain proteases	23	0.413282	1.467	0.0733945	0.171855	0.11462
R-HSA-5696400	Dual Incision in GG-NER	18	-0.33835	-1.47039	0.0740741	0.172974	0.115366
R-HSA-449836	Other interleukin signaling	11	0.524358	1.51769	0.0751445	0.174218	0.116195
R-HSA-2980766	Nuclear Envelope Breakdown	23	-0.304984	-1.42873	0.0753138	0.174218	0.116195
R-HSA-425393	Transport of inorganic cations/anions and amino acids/oligopeptides	36	0.359393	1.45344	0.0757946	0.174218	0.116195
R-HSA-432040	Vasopressin regulates renal water homeostasis via Aquaporins	13	-0.393337	-1.51429	0.0759494	0.174218	0.116195
R-HSA-445717	Aquaporin-mediated transport	13	-0.393337	-1.51429	0.0759494	0.174218	0.116195
R-HSA-180910	Vpr-mediated nuclear import of PICs	13	-0.394334	-1.51812	0.0759494	0.174218	0.116195
R-HSA-453274	Mitotic G2-G2/M phases	74	-0.205637	-1.43241	0.0761905	0.174218	0.116195
R-HSA-1234176	Oxygen-dependent proline hydroxylation of Hypoxia-inducible Factor Alpha	26	-0.291284	-1.43072	0.0762332	0.174218	0.116195
R-HSA-3000171	Non-integrin membrane-ECM interactions	24	-0.29363	-1.38066	0.0779221	0.176965	0.118027
R-HSA-1474290	Collagen formation	24	-0.293992	-1.38236	0.0779221	0.176965	0.118027
R-HSA-141424	Amplification of signal from the kinetochores	25	-0.290294	-1.39657	0.0782609	0.176965	0.118027
R-HSA-141444	Amplification of signal from unattached kinetochores via a MAD2 inhibitory signal	25	-0.290294	-1.39657	0.0782609	0.176965	0.118027
R-HSA-176814	Activation of APC/C and APC/C:Cdc20 mediated degradation of mitotic proteins	32	-0.262372	-1.39797	0.079602	0.179165	0.119495
R-HSA-180024	DARPP-32 events	15	-0.365013	-1.47637	0.0798611	0.179165	0.119495
R-HSA-110314	Recognition of DNA damage by PCNA-containing replication complex	15	-0.363885	-1.47181	0.0798611	0.179165	0.119495
R-HSA-5620920	Cargo trafficking to the periciliary membrane	16	-0.351604	-1.466	0.0804196	0.179947	0.120016
R-HSA-6811442	Intra-Golgi and retrograde Golgi-to-ER traffic	66	-0.201909	-1.41186	0.0806452	0.179982	0.120039
R-HSA-1442490	Collagen degradation	15	-0.362835	-1.46756	0.0833333	0.185498	0.123718
R-HSA-8854050	FBXL7 down-regulates AURKA during mitotic entry and in early mitosis	26	-0.28652	-1.40732	0.0852018	0.189166	0.126165
R-HSA-888590	GABA synthesis, release, reuptake and degradation	10	0.530671	1.48007	0.0866373	0.191856	0.127959
R-HSA-112409	RAF-independent MAPK1/3 activation	12	0.497759	1.47316	0.0892086	0.197041	0.131417
R-HSA-199991	Membrane Trafficking	222	-0.14282	-1.3064	0.0909091	0.198888	0.132649
R-HSA-5653656	Vesicle-mediated transport	236	-0.141731	-1.26215	0.0909091	0.198888	0.132649
R-HSA-168271	Transport of Ribonucleoproteins into the Host Nucleus	12	-0.394266	-1.45491	0.0912052	0.198888	0.132649
R-HSA-170822	Regulation of Glucokinase by Glucokinase Regulatory Protein	12	-0.394266	-1.45491	0.0912052	0.198888	0.132649
R-HSA-5619107	Defective TPR may confer susceptibility towards thyroid papillary carcinoma (TPC)	12	-0.394266	-1.45491	0.0912052	0.198888	0.132649
R-HSA-1630316	Glycosaminoglycan metabolism	43	-0.230476	-1.37572	0.0924855	0.201168	0.13417
R-HSA-3560782	Diseases associated with glycosaminoglycan metabolism	16	-0.344151	-1.43493	0.0944056	0.204824	0.136608
R-HSA-109704	PI3K Cascade	13	0.483325	1.4616	0.0947522	0.205028	0.136744
R-HSA-418594	G alpha (i) signalling events	90	0.283382	1.36749	0.0949782	0.205028	0.136744
R-HSA-5685942	HDR through Homologous Recombination (HRR)	18	-0.322677	-1.40228	0.0962963	0.207352	0.138294
R-HSA-8948216	Collagen chain trimerization	11	-0.402397	-1.4292	0.0967742	0.207686	0.138517
R-HSA-445989	TAK1 activates NFkB by phosphorylation and activation of IKKs complex	21	0.410751	1.42512	0.0972037	0.207686	0.138517
R-HSA-69205	G1/S-Specific Transcription	15	-0.358024	-1.4481	0.0972222	0.207686	0.138517
R-HSA-9634638	Estrogen-dependent nuclear events downstream of ESR-membrane signaling	14	0.469389	1.45327	0.0974212	0.207686	0.138517
R-HSA-5357905	Regulation of TNFR1 signaling	20	0.411603	1.40878	0.0986486	0.209781	0.139914
R-HSA-3858494	Beta-catenin independent WNT signaling	54	-0.210166	-1.33338	0.1	0.212129	0.14148
R-HSA-168138	Toll Like Receptor 9 (TLR9) Cascade	48	0.323437	1.38445	0.101432	0.214185	0.142851
R-HSA-112399	IRS-mediated signalling	14	0.462194	1.43099	0.101719	0.214185	0.142851
R-HSA-2428928	IRS-related events triggered by IGF1R	14	0.462194	1.43099	0.101719	0.214185	0.142851
R-HSA-451927	Interleukin-2 family signaling	13	0.472885	1.43003	0.106414	0.223522	0.149078
R-HSA-5696398	Nucleotide Excision Repair	52	-0.209543	-1.30573	0.108844	0.22779	0.151926
R-HSA-2404192	Signaling by Type 1 Insulin-like Growth Factor 1 Receptor (IGF1R)	15	0.446124	1.42056	0.109244	0.22779	0.151926
R-HSA-2428924	IGF1R signaling cascade	15	0.446124	1.42056	0.109244	0.22779	0.151926
R-HSA-6814122	Cooperation of PDCL (PhLP1) and TRiC/CCT in G-protein beta folding	13	-0.369302	-1.42175	0.110759	0.229278	0.152917
R-HSA-76061	RNA Polymerase III Transcription Initiation From Type 1 Promoter	13	-0.371123	-1.42877	0.110759	0.229278	0.152917
R-HSA-76066	RNA Polymerase III Transcription Initiation From Type 2 Promoter	13	-0.371123	-1.42877	0.110759	0.229278	0.152917
R-HSA-8964043	Plasma lipoprotein clearance	18	-0.319335	-1.38775	0.111111	0.229451	0.153033
R-HSA-9619483	Activation of AMPK downstream of NMDARs	12	-0.37119	-1.36975	0.114007	0.233263	0.155575
R-HSA-168142	Toll Like Receptor 10 (TLR10) Cascade	45	0.323037	1.37079	0.114046	0.233263	0.155575
R-HSA-168176	Toll Like Receptor 5 (TLR5) Cascade	45	0.323037	1.37079	0.114046	0.233263	0.155575
R-HSA-975871	MyD88 cascade initiated on plasma membrane	45	0.323037	1.37079	0.114046	0.233263	0.155575
R-HSA-917977	Transferrin endocytosis and recycling	15	-0.352277	-1.42486	0.114583	0.233805	0.155937
R-HSA-199418	Negative regulation of the PI3K/AKT network	35	0.343584	1.3773	0.115528	0.234775	0.156584
R-HSA-391251	Protein folding	43	-0.224982	-1.34293	0.115607	0.234775	0.156584
R-HSA-975138	TRAF6 mediated induction of NFkB and MAP kinases upon TLR7/8 or 9 activation	45	0.320927	1.36184	0.117647	0.238353	0.158971
R-HSA-163359	Glucagon signaling in metabolic regulation	11	-0.392381	-1.39363	0.119355	0.24046	0.160376
R-HSA-72202	Transport of Mature Transcript to Cytoplasm	36	-0.240098	-1.31567	0.119565	0.24046	0.160376
R-HSA-9006934	Signaling by Receptor Tyrosine Kinases	166	-0.136092	-1.18846	0.12	0.24046	0.160376
R-HSA-167160	RNA Pol II CTD phosphorylation and interaction with CE during HIV infection	13	-0.358783	-1.38126	0.120253	0.24046	0.160376
R-HSA-77075	RNA Pol II CTD phosphorylation and interaction with CE	13	-0.358783	-1.38126	0.120253	0.24046	0.160376
R-HSA-5610785	GLI3 is processed to GLI3R by the proteasome	29	-0.258802	-1.32194	0.12037	0.24046	0.160376
R-HSA-4641257	Degradation of AXIN	25	-0.272641	-1.31164	0.121739	0.242629	0.161822
R-HSA-159234	Transport of Mature mRNAs Derived from Intronless Transcripts	18	-0.315492	-1.37105	0.122222	0.243027	0.162087
R-HSA-382551	Transport of small molecules	249	-0.17872	-1.5556	0.125	0.247402	0.165005
R-HSA-5362517	Signaling by Retinoic Acid	17	-0.317899	-1.34941	0.125	0.247402	0.165005
R-HSA-1834949	Cytosolic sensors of pathogen-associated DNA	34	0.337953	1.34094	0.1325	0.261534	0.174431
R-HSA-1839126	FGFR2 mutant receptor activation	13	-0.346426	-1.33368	0.132911	0.261534	0.174431
R-HSA-70268	Pyruvate metabolism	20	-0.290739	-1.33495	0.133588	0.261534	0.174431
R-HSA-174113	SCF-beta-TrCP mediated degradation of Emi1	27	-0.261628	-1.31151	0.133929	0.261534	0.174431
R-HSA-8948751	Regulation of PTEN stability and activity	30	-0.24352	-1.27101	0.133971	0.261534	0.174431
R-HSA-4608870	Asymmetric localization of PCP proteins	31	-0.244402	-1.30551	0.133971	0.261534	0.174431
R-HSA-5578775	Ion homeostasis	12	-0.359663	-1.32722	0.136808	0.266373	0.177658
R-HSA-3000170	Syndecan interactions	10	-0.397955	-1.34281	0.137072	0.266373	0.177658
R-HSA-5218920	VEGFR2 mediated vascular permeability	14	-0.339073	-1.34263	0.138158	0.267272	0.178258
R-HSA-72086	mRNA Capping	14	-0.339587	-1.34466	0.138158	0.267272	0.178258
R-HSA-432722	Golgi Associated Vesicle Biogenesis	25	-0.264462	-1.27229	0.13913	0.268547	0.179108
R-HSA-3899300	SUMOylation of transcription cofactors	24	0.370407	1.3408	0.145266	0.279595	0.186477
R-HSA-113418	Formation of the Early Elongation Complex	15	-0.337271	-1.36416	0.145833	0.279595	0.186477
R-HSA-167158	Formation of the HIV-1 Early Elongation Complex	15	-0.337271	-1.36416	0.145833	0.279595	0.186477
R-HSA-159231	Transport of Mature mRNA Derived from an Intronless Transcript	17	-0.311478	-1.32215	0.146429	0.28011	0.18682
R-HSA-190236	Signaling by FGFR	34	-0.235486	-1.27749	0.148515	0.283468	0.18906
R-HSA-389957	Prefoldin mediated transfer of substrate to CCT/TriC	16	-0.317392	-1.32336	0.15035	0.286333	0.19097
R-HSA-1638091	Heparan sulfate/heparin (HS-GAG) metabolism	21	-0.285483	-1.31365	0.151394	0.287683	0.191871
R-HSA-2029480	Fcgamma receptor (FCGR) dependent phagocytosis	25	-0.261034	-1.2558	0.152174	0.288524	0.192432
R-HSA-1483206	Glycerophospholipid biosynthesis	40	-0.221229	-1.29862	0.153005	0.288949	0.192715
R-HSA-174143	APC/C-mediated degradation of cell cycle proteins	38	-0.220355	-1.24496	0.153409	0.288949	0.192715
R-HSA-453276	Regulation of mitotic cell cycle	38	-0.220355	-1.24496	0.153409	0.288949	0.192715
R-HSA-190861	Gap junction assembly	10	-0.391356	-1.32054	0.155763	0.292739	0.195243
R-HSA-400206	Regulation of lipid metabolism by Peroxisome proliferator-activated receptor alpha (PPARalpha)	49	0.300952	1.29709	0.161712	0.303224	0.202236
R-HSA-74751	Insulin receptor signalling cascade	17	0.402314	1.32716	0.16205	0.303224	0.202236
R-HSA-8873719	RAB geranylgeranylation	18	-0.29788	-1.29452	0.162963	0.303757	0.202592
R-HSA-176408	Regulation of APC/C activators between G1/S and early anaphase	36	-0.227201	-1.245	0.163043	0.303757	0.202592
R-HSA-556833	Metabolism of lipids	279	-0.224431	-2.03629	0.166667	0.309834	0.206645
R-HSA-72187	mRNA 3'-end processing	25	0.355779	1.29833	0.168394	0.312367	0.208334
R-HSA-380994	ATF4 activates genes in response to endoplasmic reticulum stress	14	0.428971	1.32813	0.169054	0.312915	0.2087
R-HSA-4085377	SUMOylation of SUMOylation proteins	14	-0.325743	-1.28985	0.171053	0.315083	0.210146
R-HSA-6804115	TP53 regulates transcription of additional cell cycle genes whose exact role in the p53 pathway remain uncertain	12	0.449348	1.32989	0.171223	0.315083	0.210146
R-HSA-159230	Transport of the SLBP Dependant Mature mRNA	16	-0.310902	-1.2963	0.171329	0.315083	0.210146
R-HSA-159236	Transport of Mature mRNA derived from an Intron-Containing Transcript	32	-0.23993	-1.2784	0.174129	0.319548	0.213123
R-HSA-112310	Neurotransmitter release cycle	22	0.369066	1.29799	0.176548	0.322581	0.215147
R-HSA-3000178	ECM proteoglycans	21	0.37303	1.29425	0.177097	0.322581	0.215147
R-HSA-418555	G alpha (s) signalling events	34	0.32783	1.30077	0.1775	0.322581	0.215147
R-HSA-5693532	DNA Double-Strand Break Repair	52	0.294308	1.28651	0.177778	0.322581	0.215147
R-HSA-6781823	Formation of TC-NER Pre-Incision Complex	25	-0.257236	-1.23753	0.178261	0.322581	0.215147
R-HSA-177243	Interactions of Rev with host cellular proteins	16	-0.305488	-1.27372	0.178322	0.322581	0.215147
R-HSA-182971	EGFR downregulation	12	0.445362	1.31809	0.178417	0.322581	0.215147
R-HSA-193639	p75NTR signals via NF-kB	11	0.454421	1.31526	0.184971	0.333663	0.222537
R-HSA-76002	Platelet activation, signaling and aggregation	82	-0.166856	-1.21014	0.185567	0.333663	0.222537
R-HSA-72203	Processing of Capped Intron-Containing Pre-mRNA	106	-0.151025	-1.17369	0.185714	0.333663	0.222537
R-HSA-446652	Interleukin-1 family signaling	60	0.278715	1.24742	0.188222	0.33746	0.22507
R-HSA-429947	Deadenylation of mRNA	10	0.467605	1.30418	0.190896	0.34154	0.227791
R-HSA-8941858	Regulation of RUNX3 expression and activity	26	-0.248944	-1.22275	0.192825	0.343479	0.229084
R-HSA-5696399	Global Genome Nucleotide Excision Repair (GG-NER)	38	-0.21434	-1.21097	0.193182	0.343479	0.229084
R-HSA-390466	Chaperonin-mediated protein folding	38	-0.21497	-1.21454	0.193182	0.343479	0.229084
R-HSA-1660499	Synthesis of PIPs at the plasma membrane	15	0.409409	1.30365	0.194678	0.345422	0.23038
R-HSA-977606	Regulation of Complement cascade	16	-0.298752	-1.24564	0.195804	0.346274	0.230949
R-HSA-6783310	Fanconi Anemia Pathway	11	-0.349027	-1.23965	0.196774	0.346274	0.230949
R-HSA-5693579	Homologous DNA Pairing and Strand Exchange	11	-0.350733	-1.24571	0.196774	0.346274	0.230949
R-HSA-5693616	Presynaptic phase of homologous DNA pairing and strand exchange	11	-0.350733	-1.24571	0.196774	0.346274	0.230949
R-HSA-1989781	PPARA activates gene expression	48	0.294713	1.2615	0.198091	0.347876	0.232017
R-HSA-5656169	Termination of translesion DNA synthesis	20	0.366989	1.25608	0.201351	0.35288	0.235354
R-HSA-8848021	Signaling by PTK6	18	0.37521	1.25607	0.202186	0.352899	0.235367
R-HSA-9006927	Signaling by Non-Receptor Tyrosine Kinases	18	0.37521	1.25607	0.202186	0.352899	0.235367
R-HSA-6790901	rRNA modification in the nucleus and cytosol	24	-0.260143	-1.2232	0.203463	0.354406	0.236373
R-HSA-5658442	Regulation of RAS by GAPs	32	-0.228266	-1.21625	0.20398	0.354586	0.236492
R-HSA-419037	NCAM1 interactions	11	0.44292	1.28198	0.208092	0.36069	0.240564
R-HSA-159227	Transport of the SLBP independent Mature mRNA	15	-0.310848	-1.25729	0.208333	0.36069	0.240564
R-HSA-5685938	HDR through Single Strand Annealing (SSA)	11	-0.345402	-1.22677	0.209677	0.362285	0.241627
R-HSA-167238	Pausing and recovery of Tat-mediated HIV elongation	14	-0.303271	-1.20086	0.210526	0.362291	0.241631
R-HSA-167243	Tat-mediated HIV elongation arrest and recovery	14	-0.303271	-1.20086	0.210526	0.362291	0.241631
R-HSA-165054	Rev-mediated nuclear export of HIV RNA	15	-0.301641	-1.22005	0.215278	0.369485	0.246429
R-HSA-72306	tRNA processing	42	-0.207336	-1.22766	0.215569	0.369485	0.246429
R-HSA-5684996	MAPK1/MAPK3 signaling	97	0.248876	1.21102	0.219193	0.374947	0.250072
R-HSA-5654733	Negative regulation of FGFR4 signaling	12	0.423159	1.25238	0.221583	0.37828	0.252295
R-HSA-4641258	Degradation of DVL	27	-0.240163	-1.20391	0.223214	0.380307	0.253647
R-HSA-112314	Neurotransmitter receptors and postsynaptic signal transmission	66	-0.171516	-1.19934	0.225806	0.383961	0.256084
R-HSA-6784531	tRNA processing in the nucleus	24	-0.255015	-1.19909	0.229437	0.389362	0.259686
R-HSA-5654727	Negative regulation of FGFR2 signaling	12	0.419311	1.24099	0.230216	0.389911	0.260052
R-HSA-112040	G-protein mediated events	17	-0.281862	-1.19644	0.232143	0.392399	0.261712
R-HSA-3108232	SUMO E3 ligases SUMOylate target proteins	72	0.25698	1.19822	0.233333	0.393635	0.262536
R-HSA-5683057	MAPK family signaling cascades	111	0.237572	1.18885	0.236111	0.397539	0.26514
R-HSA-2173782	Binding and Uptake of Ligands by Scavenger Receptors	16	-0.290049	-1.20935	0.237762	0.398959	0.266087
R-HSA-8940973	RUNX2 regulates osteoblast differentiation	10	0.440398	1.2283	0.237885	0.398959	0.266087
R-HSA-179409	APC-Cdc20 mediated degradation of Nek2A	10	-0.359747	-1.21389	0.239875	0.40151	0.267789
R-HSA-1483249	Inositol phosphate metabolism	18	-0.269786	-1.17243	0.240741	0.402173	0.268231
R-HSA-422356	Regulation of insulin secretion	21	0.352546	1.22318	0.243675	0.406283	0.270972
R-HSA-5673001	RAF/MAP kinase cascade	95	0.242762	1.18086	0.247557	0.411954	0.274754
R-HSA-2151201	Transcriptional activation of mitochondrial biogenesis	24	0.335359	1.21393	0.249027	0.413119	0.275531
R-HSA-110320	Translesion Synthesis by POLH	10	-0.357107	-1.20498	0.249221	0.413119	0.275531
R-HSA-1433557	Signaling by SCF-KIT	15	0.382373	1.21756	0.252101	0.417086	0.278177
R-HSA-216083	Integrin cell surface interactions	26	0.326624	1.2056	0.254172	0.419377	0.279705
R-HSA-69541	Stabilization of p53	27	-0.234304	-1.17454	0.254464	0.419377	0.279705
R-HSA-2990846	SUMOylation	75	0.25212	1.17463	0.255605	0.420449	0.28042
R-HSA-73856	RNA Polymerase II Transcription Termination	28	0.31955	1.20714	0.257942	0.423479	0.282441
R-HSA-9020591	Interleukin-12 signaling	21	-0.249716	-1.14907	0.258964	0.424018	0.2828
R-HSA-446728	Cell junction organization	18	-0.264487	-1.1494	0.259259	0.424018	0.2828
R-HSA-168274	Export of Viral Ribonucleoproteins from Nucleus	14	-0.28899	-1.14431	0.259868	0.424204	0.282924
R-HSA-1251985	Nuclear signaling by ERBB4	13	0.400541	1.21126	0.260933	0.425132	0.283543
R-HSA-4570464	SUMOylation of RNA binding proteins	18	-0.259349	-1.12707	0.266667	0.43365	0.289224
R-HSA-9607240	FLT3 Signaling	100	0.236924	1.15888	0.268266	0.435424	0.290408
R-HSA-983231	Factors involved in megakaryocyte development and platelet production	46	0.271441	1.15671	0.268817	0.435494	0.290454
R-HSA-8876198	RAB GEFs exchange GTP for GDP on RABs	21	-0.247036	-1.13673	0.2749	0.444509	0.296467
R-HSA-5654743	Signaling by FGFR4	15	0.371531	1.18304	0.281513	0.454343	0.303026
R-HSA-2172127	DAP12 interactions	13	0.390826	1.18188	0.282799	0.455561	0.303838
R-HSA-5654732	Negative regulation of FGFR3 signaling	12	0.395187	1.16959	0.283453	0.455759	0.30397
R-HSA-1368082	RORA activates gene expression	10	0.416097	1.16052	0.28928	0.464257	0.309638
R-HSA-110313	Translesion synthesis by Y family DNA polymerases bypasses lesions on DNA template	22	0.332947	1.17096	0.289855	0.46431	0.309673
R-HSA-193648	NRAGE signals death through JNK	11	0.401689	1.16264	0.291908	0.465847	0.310698
R-HSA-1280218	Adaptive Immune System	243	0.205918	1.11158	0.292634	0.465847	0.310698
R-HSA-204174	Regulation of pyruvate dehydrogenase (PDH) complex	10	-0.341211	-1.15134	0.292835	0.465847	0.310698
R-HSA-166208	mTORC1-mediated signalling	12	-0.304477	-1.12357	0.29316	0.465847	0.310698
R-HSA-111885	Opioid Signalling	32	-0.212901	-1.13438	0.293532	0.465847	0.310698
R-HSA-2980736	Peptide hormone metabolism	27	-0.226179	-1.13381	0.294643	0.466745	0.311297
R-HSA-194840	Rho GTPase cycle	37	0.28693	1.17183	0.2954	0.46708	0.311521
R-HSA-112043	PLC beta mediated events	16	-0.267409	-1.11495	0.297203	0.468018	0.312146
R-HSA-168333	NEP/NS2 Interacts with the Cellular Export Machinery	13	-0.287105	-1.10531	0.297468	0.468018	0.312146
R-HSA-69620	Cell Cycle Checkpoints	101	-0.135393	-1.06628	0.3	0.468018	0.312146
R-HSA-381042	PERK regulates gene expression	17	0.355776	1.17364	0.300554	0.468018	0.312146
R-HSA-2644602	Signaling by NOTCH1 PEST Domain Mutants in Cancer	24	0.323133	1.16968	0.300908	0.468018	0.312146
R-HSA-2644603	Signaling by NOTCH1 in Cancer	24	0.323133	1.16968	0.300908	0.468018	0.312146
R-HSA-2644606	Constitutive Signaling by NOTCH1 PEST Domain Mutants	24	0.323133	1.16968	0.300908	0.468018	0.312146
R-HSA-2894858	Signaling by NOTCH1 HD+PEST Domain Mutants in Cancer	24	0.323133	1.16968	0.300908	0.468018	0.312146
R-HSA-2894862	Constitutive Signaling by NOTCH1 HD+PEST Domain Mutants	24	0.323133	1.16968	0.300908	0.468018	0.312146
R-HSA-3928662	EPHB-mediated forward signaling	12	-0.302369	-1.11579	0.302932	0.470312	0.313676
R-HSA-5655302	Signaling by FGFR1 in disease	12	0.385484	1.14087	0.305036	0.472723	0.315284
R-HSA-901032	ER Quality Control Compartment (ERQC)	14	-0.280049	-1.10891	0.305921	0.473239	0.315628
R-HSA-210500	Glutamate Neurotransmitter Release Cycle	11	0.389522	1.12742	0.319364	0.493144	0.328904
R-HSA-2173793	Transcriptional activity of SMAD2/SMAD3:SMAD4 heterotrimer	30	0.29602	1.13647	0.320303	0.493704	0.329277
R-HSA-5696395	Formation of Incision Complex in GG-NER	19	-0.245651	-1.0947	0.321839	0.495181	0.330263
R-HSA-195721	Signaling by WNT	112	0.222671	1.11644	0.324786	0.498585	0.332533
R-HSA-1980145	Signaling by NOTCH2	14	0.369389	1.14366	0.325215	0.498585	0.332533
R-HSA-983189	Kinesins	13	-0.277186	-1.06712	0.338608	0.517732	0.345303
R-HSA-1236978	Cross-presentation of soluble exogenous antigens (endosomes)	23	-0.236534	-1.10807	0.338912	0.517732	0.345303
R-HSA-9020702	Interleukin-1 signaling	50	0.253435	1.09961	0.341981	0.521491	0.34781
R-HSA-1638074	Keratan sulfate/keratin metabolism	11	0.383891	1.11112	0.343931	0.523532	0.349171
R-HSA-212676	Dopamine Neurotransmitter Release Cycle	10	0.396305	1.10532	0.345081	0.524351	0.349718
R-HSA-1483191	Synthesis of PC	10	-0.321981	-1.08645	0.345794	0.524506	0.349821
R-HSA-196807	Nicotinate metabolism	11	0.380858	1.10234	0.346821	0.524927	0.350102
R-HSA-2122947	NOTCH1 Intracellular Domain Regulates Transcription	20	0.325916	1.1155	0.347297	0.524927	0.350102
R-HSA-8866654	E3 ubiquitin ligases ubiquitinate target proteins	21	0.319983	1.1102	0.354194	0.53441	0.356426
R-HSA-195253	Degradation of beta-catenin by the destruction complex	37	-0.192468	-1.05824	0.357955	0.539073	0.359537
R-HSA-5654741	Signaling by FGFR3	15	0.349036	1.11141	0.358543	0.539073	0.359537
R-HSA-350054	Notch-HLH transcription pathway	10	0.389522	1.0864	0.359765	0.539963	0.36013
R-HSA-2424491	DAP12 signaling	11	0.375324	1.08633	0.362717	0.543073	0.362205
R-HSA-8862803	Deregulated CDK5 triggers multiple neurodegenerative pathways in Alzheimer's disease models	13	-0.271557	-1.04545	0.363924	0.543073	0.362205
R-HSA-8863678	Neurodegenerative Diseases	13	-0.271557	-1.04545	0.363924	0.543073	0.362205
R-HSA-166658	Complement cascade	19	0.326676	1.11118	0.364372	0.543073	0.362205
R-HSA-69615	G1/S DNA Damage Checkpoints	33	-0.200814	-1.08562	0.367647	0.546306	0.36436
R-HSA-5696394	DNA Damage Recognition in GG-NER	19	-0.238708	-1.06376	0.367816	0.546306	0.36436
R-HSA-204005	COPII-mediated vesicle transport	28	-0.213643	-1.0732	0.372093	0.551609	0.367897
R-HSA-5655862	Translesion synthesis by POLK	10	-0.312489	-1.05442	0.373832	0.551609	0.367897
R-HSA-5656121	Translesion synthesis by POLI	10	-0.312489	-1.05442	0.373832	0.551609	0.367897
R-HSA-375165	NCAM signaling for neurite out-growth	17	0.330662	1.09079	0.373961	0.551609	0.367897
R-HSA-69278	Cell Cycle, Mitotic	209	-0.124303	-1.10426	0.375	0.552191	0.368285
R-HSA-5576892	Phase 0 - rapid depolarisation	11	0.370397	1.07207	0.375723	0.552306	0.368362
R-HSA-6794361	Neurexins and neuroligins	15	-0.257765	-1.04258	0.378472	0.555395	0.370423
R-HSA-195258	RHO GTPase Effectors	97	0.219333	1.06726	0.38277	0.560742	0.373988
R-HSA-194315	Signaling by Rho GTPases	132	0.208597	1.06931	0.385417	0.563655	0.375932
R-HSA-5339562	Uptake and actions of bacterial toxins	19	0.319227	1.08584	0.391363	0.571377	0.381082
R-HSA-416476	G alpha (q) signalling events	44	0.251078	1.05837	0.39372	0.57384	0.382724
R-HSA-5668541	TNFR2 non-canonical NF-kB pathway	38	0.259099	1.06818	0.399516	0.580034	0.386855
R-HSA-8953854	Metabolism of RNA	281	-0.121017	-1.09611	0.4	0.580034	0.386855
R-HSA-425407	SLC-mediated transmembrane transport	78	0.222499	1.04544	0.4	0.580034	0.386855
R-HSA-1500931	Cell-Cell communication	27	-0.207563	-1.04049	0.401786	0.580401	0.3871
R-HSA-69563	p53-Dependent G1 DNA Damage Response	32	-0.197819	-1.05402	0.402985	0.580401	0.3871
R-HSA-69580	p53-Dependent G1/S DNA damage checkpoint	32	-0.197819	-1.05402	0.402985	0.580401	0.3871
R-HSA-73893	DNA Damage Bypass	26	0.292085	1.07812	0.403081	0.580401	0.3871
R-HSA-3769402	Deactivation of the beta-catenin transactivating complex	20	0.311467	1.06605	0.404054	0.580401	0.3871
R-HSA-352230	Amino acid transport across the plasma membrane	12	0.356988	1.05654	0.404317	0.580401	0.3871
R-HSA-9006936	Signaling by TGF-beta family members	53	0.238442	1.04789	0.407451	0.583876	0.389418
R-HSA-1222556	ROS and RNS production in phagocytes	10	-0.303582	-1.02437	0.4081	0.583876	0.389418
R-HSA-5654736	Signaling by FGFR1	17	0.320733	1.05804	0.411357	0.587555	0.391872
R-HSA-397795	G-protein beta:gamma signalling	11	0.353801	1.02403	0.416185	0.593162	0.395611
R-HSA-2682334	EPH-Ephrin signaling	33	-0.195927	-1.0592	0.416667	0.593162	0.395611
R-HSA-193704	p75 NTR receptor-mediated signalling	31	0.27335	1.0541	0.418663	0.595016	0.396848
R-HSA-438064	Post NMDA receptor activation events	29	-0.206426	-1.05441	0.425926	0.60178	0.401359
R-HSA-1257604	PIP3 activates AKT signaling	102	0.211512	1.03975	0.426566	0.60178	0.401359
R-HSA-167287	HIV elongation arrest and recovery	16	-0.240814	-1.00407	0.426573	0.60178	0.401359
R-HSA-167290	Pausing and recovery of HIV elongation	16	-0.240814	-1.00407	0.426573	0.60178	0.401359
R-HSA-2022090	Assembly of collagen fibrils and other multimeric structures	14	0.333954	1.03395	0.426934	0.60178	0.401359
R-HSA-168927	TICAM1, RIP1-mediated IKK complex recruitment	11	0.351831	1.01833	0.427746	0.601934	0.401462
R-HSA-373755	Semaphorin interactions	27	-0.203521	-1.02023	0.428571	0.602108	0.401578
R-HSA-8941326	RUNX2 regulates bone development	12	0.347639	1.02887	0.430216	0.602206	0.401643
R-HSA-1234174	Cellular response to hypoxia	29	-0.205822	-1.05132	0.430556	0.602206	0.401643
R-HSA-4551638	SUMOylation of chromatin organization proteins	28	0.275957	1.04246	0.43075	0.602206	0.401643
R-HSA-1538133	G0 and Early G1	14	-0.25604	-1.01384	0.434211	0.605052	0.403541
R-HSA-8943724	Regulation of PTEN gene transcription	27	0.278813	1.03734	0.434447	0.605052	0.403541
R-HSA-8939243	RUNX1 interacts with co-factors whose precise effect on RUNX1 targets is not known	17	0.314465	1.03736	0.434903	0.605052	0.403541
R-HSA-5654726	Negative regulation of FGFR1 signaling	10	0.367717	1.02558	0.436123	0.605766	0.404018
R-HSA-8863795	Downregulation of ERBB2 signaling	13	0.339803	1.02758	0.440233	0.610485	0.407165
R-HSA-5619115	Disorders of transmembrane transporters	65	-0.149002	-1.03458	0.441667	0.610528	0.407194
R-HSA-69481	G2/M Checkpoints	65	0.227508	1.03299	0.442177	0.610528	0.407194
R-HSA-194138	Signaling by VEGF	32	-0.190584	-1.01547	0.442786	0.610528	0.407194
R-HSA-69202	Cyclin E associated events during G1/S transition	42	-0.16649	-0.985804	0.443114	0.610528	0.407194
R-HSA-5619102	SLC transporter disorders	30	0.268015	1.02896	0.443884	0.610608	0.407247
R-HSA-1980143	Signaling by NOTCH1	28	0.271839	1.02691	0.447268	0.614277	0.409694
R-HSA-917729	Endosomal Sorting Complex Required For Transport (ESCRT)	14	0.324353	1.00422	0.452722	0.620295	0.413708
R-HSA-5654738	Signaling by FGFR2	29	-0.202273	-1.0332	0.453704	0.620295	0.413708
R-HSA-140877	Formation of Fibrin Clot (Clotting Cascade)	14	0.323231	1.00075	0.454155	0.620295	0.413708
R-HSA-1640170	Cell Cycle	236	-0.115259	-1.02641	0.454545	0.620295	0.413708
R-HSA-1169091	Activation of NF-kappaB in B cells	34	0.258185	1.02443	0.4575	0.623335	0.415735
R-HSA-8854214	TBC/RABGAPs	18	0.30214	1.01146	0.468579	0.637417	0.425127
R-HSA-5655253	Signaling by FGFR2 in disease	17	0.306764	1.01196	0.473684	0.639813	0.426726
R-HSA-447115	Interleukin-12 family signaling	25	-0.206324	-0.992598	0.473913	0.639813	0.426726
R-HSA-167169	HIV Transcription Elongation	18	-0.223876	-0.97291	0.474074	0.639813	0.426726
R-HSA-167200	Formation of HIV-1 elongation complex containing HIV-1 Tat	18	-0.223876	-0.97291	0.474074	0.639813	0.426726
R-HSA-167246	Tat-mediated elongation of the HIV-1 transcript	18	-0.223876	-0.97291	0.474074	0.639813	0.426726
R-HSA-74752	Signaling by Insulin receptor	27	0.268933	1.00058	0.479434	0.64603	0.430872
R-HSA-420092	Glucagon-type ligand receptors	10	-0.288766	-0.974378	0.482866	0.649633	0.433275
R-HSA-198725	Nuclear Events (kinase and transcription factor activation)	11	-0.272759	-0.968764	0.483871	0.649965	0.433496
R-HSA-1660661	Sphingolipid de novo biosynthesis	17	-0.228221	-0.968744	0.485714	0.650759	0.434026
R-HSA-77387	Insulin receptor recycling	10	-0.286289	-0.966018	0.485981	0.650759	0.434026
R-HSA-450321	JNK (c-Jun kinases) phosphorylation and activation mediated by activated human TAK1	13	0.326648	0.987801	0.488338	0.651413	0.434462
R-HSA-5676590	NIK-->noncanonical NF-kB signaling	28	-0.197445	-0.991831	0.488372	0.651413	0.434462
R-HSA-450294	MAP kinase activation	34	0.251227	0.996827	0.48875	0.651413	0.434462
R-HSA-2173796	SMAD2/SMAD3:SMAD4 heterotrimer regulates transcription	22	0.280622	0.986933	0.492754	0.65573	0.437341
R-HSA-162588	Budding and maturation of HIV virion	13	0.324296	0.980688	0.494169	0.656594	0.437917
R-HSA-450513	Tristetraprolin (TTP, ZFP36) binds and destabilizes mRNA	10	0.349912	0.975927	0.499266	0.662339	0.441749
R-HSA-5674400	Constitutive Signaling by AKT1 E17K in Cancer	14	0.310832	0.962362	0.501433	0.664185	0.44298
R-HSA-4420097	VEGFA-VEGFR2 Pathway	30	-0.190518	-0.994377	0.502392	0.664429	0.443143
R-HSA-9609523	Insertion of tail-anchored proteins into the endoplasmic reticulum membrane	10	-0.281643	-0.950343	0.504673	0.665511	0.443865
R-HSA-9617324	Negative regulation of NMDA receptor-mediated neuronal transmission	10	0.343788	0.958847	0.50514	0.665511	0.443865
R-HSA-9024446	NR1H2 and NR1H3-mediated signaling	17	0.297925	0.982801	0.50554	0.665511	0.443865
R-HSA-442755	Activation of NMDA receptors and postsynaptic events	34	-0.18023	-0.977731	0.509901	0.66934	0.446418
R-HSA-2173788	Downregulation of TGF-beta receptor signaling	19	0.284847	0.9689	0.510121	0.66934	0.446418
R-HSA-1643713	Signaling by EGFR in Cancer	12	0.32424	0.959616	0.510791	0.66934	0.446418
R-HSA-983705	Signaling by the B Cell Receptor (BCR)	50	0.222562	0.965659	0.516509	0.675799	0.450727
R-HSA-8955332	Carboxyterminal post-translational modifications of tubulin	17	-0.223204	-0.947446	0.517857	0.67653	0.451214
R-HSA-162710	Synthesis of glycosylphosphatidylinositol (GPI)	11	-0.263664	-0.936463	0.525806	0.683603	0.455931
R-HSA-2173795	Downregulation of SMAD2/3:SMAD4 transcriptional activity	16	0.292622	0.945	0.526536	0.683603	0.455931
R-HSA-111933	Calmodulin induced events	12	-0.255491	-0.942804	0.527687	0.683603	0.455931
R-HSA-111996	Ca-dependent events	12	-0.255491	-0.942804	0.527687	0.683603	0.455931
R-HSA-111997	CaM pathway	12	-0.255491	-0.942804	0.527687	0.683603	0.455931
R-HSA-3906995	Diseases associated with O-glycosylation of proteins	12	0.318443	0.94246	0.528058	0.683603	0.455931
R-HSA-1483255	PI Metabolism	24	0.264733	0.958281	0.531777	0.68738	0.45845
R-HSA-416482	G alpha (12/13) signalling events	18	0.285147	0.954573	0.534153	0.689411	0.459805
R-HSA-9012852	Signaling by NOTCH3	20	0.278671	0.953799	0.535135	0.68964	0.459958
R-HSA-69656	Cyclin A:Cdk2-associated events at S phase entry	43	-0.156221	-0.93249	0.537572	0.691016	0.460875
R-HSA-1296071	Potassium Channels	15	0.29241	0.9311	0.537815	0.691016	0.460875
R-HSA-421270	Cell-cell junction organization	11	-0.260689	-0.925894	0.541935	0.695268	0.463711
R-HSA-177929	Signaling by EGFR	17	0.283116	0.933946	0.549861	0.704382	0.46979
R-HSA-4791275	Signaling by WNT in cancer	14	-0.23101	-0.91473	0.552632	0.706874	0.471452
R-HSA-937041	IKK complex recruitment mediated by RIP1	10	0.324127	0.904011	0.562408	0.718307	0.479077
R-HSA-6807505	RNA polymerase II transcribes snRNA genes	34	0.235024	0.932534	0.565	0.719749	0.480039
R-HSA-448424	Interleukin-17 signaling	35	0.230949	0.925786	0.565217	0.719749	0.480039
R-HSA-8852135	Protein ubiquitination	27	0.25002	0.930213	0.569409	0.724011	0.482881
R-HSA-936837	Ion transport by P-type ATPases	18	-0.212317	-0.92268	0.574074	0.728562	0.485917
R-HSA-2022928	HS-GAG biosynthesis	13	-0.236003	-0.908573	0.575949	0.728562	0.485917
R-HSA-2262752	Cellular responses to stress	187	0.180998	0.959155	0.576375	0.728562	0.485917
R-HSA-3232142	SUMOylation of ubiquitinylation proteins	15	-0.222269	-0.899012	0.576389	0.728562	0.485917
R-HSA-5632684	Hedgehog 'on' state	35	-0.172638	-0.940539	0.57868	0.730381	0.48713
R-HSA-913709	O-linked glycosylation of mucins	15	-0.221753	-0.896928	0.579861	0.730796	0.487406
R-HSA-8953897	Cellular responses to external stimuli	188	0.17948	0.951516	0.582485	0.733016	0.488887
R-HSA-5607761	Dectin-1 mediated noncanonical NF-kB signaling	29	-0.177037	-0.90429	0.583333	0.733016	0.488887
R-HSA-9006925	Intracellular signaling by second messengers	115	0.18473	0.928344	0.584845	0.73384	0.489437
R-HSA-6782315	tRNA modification in the nucleus and cytosol	13	-0.232186	-0.89388	0.591772	0.741446	0.49451
R-HSA-3108214	SUMOylation of DNA damage response and repair proteins	30	-0.170821	-0.891573	0.598086	0.748262	0.499056
R-HSA-451326	Activation of kainate receptors upon glutamate binding	10	-0.261782	-0.883326	0.601246	0.751119	0.500962
R-HSA-5663213	RHO GTPases Activate WASPs and WAVEs	11	-0.248343	-0.882047	0.606452	0.75652	0.504563
R-HSA-450385	Butyrate Response Factor 1 (BRF1) binds and destabilizes mRNA	10	0.311856	0.869787	0.609398	0.75909	0.506278
R-HSA-8866652	Synthesis of active ubiquitin: roles of E1 and E2 enzymes	11	-0.246352	-0.874973	0.612903	0.762348	0.508451
R-HSA-75067	Processing of Capped Intronless Pre-mRNA	11	0.297429	0.86087	0.615607	0.764602	0.509954
R-HSA-170834	Signaling by TGF-beta Receptor Complex	45	0.212885	0.90337	0.619448	0.766647	0.511318
R-HSA-4641262	Disassembly of the destruction complex and recruitment of AXIN to the membrane	10	-0.256384	-0.865109	0.619938	0.766647	0.511318
R-HSA-1362277	Transcription of E2F targets under negative control by DREAM complex	10	-0.255862	-0.863351	0.619938	0.766647	0.511318
R-HSA-165159	mTOR signalling	21	-0.190555	-0.876837	0.621514	0.767489	0.511879
R-HSA-8986944	Transcriptional Regulation by MECP2	22	0.247487	0.870399	0.624506	0.770074	0.513604
R-HSA-5621481	C-type lectin receptors (CLRs)	51	0.203896	0.888669	0.626464	0.771378	0.514473
R-HSA-9007101	Rab regulation of trafficking	36	0.215258	0.870538	0.632029	0.777115	0.518299
R-HSA-1168372	Downstream signaling events of B Cell Receptor (BCR)	43	0.210088	0.88185	0.634499	0.779034	0.51958
R-HSA-425366	Transport of bile salts and organic acids, metal ions and amine compounds	22	0.243595	0.85671	0.636364	0.780205	0.520361
R-HSA-1227986	Signaling by ERBB2	19	0.253232	0.861362	0.638327	0.781494	0.52122
R-HSA-3229121	Glycogen storage diseases	10	-0.248619	-0.83891	0.647975	0.791264	0.527736
R-HSA-388841	Costimulation by the CD28 family	17	0.255416	0.84257	0.648199	0.791264	0.527736
R-HSA-450302	activated TAK1 mediates p38 MAPK activation	16	0.257835	0.832658	0.649441	0.791264	0.527736
R-HSA-373080	Class B/2 (Secretin family receptors)	17	-0.204554	-0.868284	0.65	0.791264	0.527736
R-HSA-3371571	HSF1-dependent transactivation	10	-0.248296	-0.837819	0.65109	0.791467	0.527872
R-HSA-6803204	TP53 Regulates Transcription of Genes Involved in Cytochrome C Release	11	0.284399	0.823156	0.660405	0.801653	0.534665
R-HSA-1266738	Developmental Biology	343	0.166784	0.917661	0.668669	0.810536	0.54059
R-HSA-167152	Formation of HIV elongation complex in the absence of HIV Tat	20	-0.179279	-0.823175	0.671756	0.813128	0.542318
R-HSA-6804757	Regulation of TP53 Degradation	19	0.239736	0.815454	0.676113	0.816529	0.544586
R-HSA-8856828	Clathrin-mediated endocytosis	60	-0.132785	-0.876125	0.676471	0.816529	0.544586
R-HSA-73894	DNA Repair	121	0.173159	0.876433	0.679365	0.818869	0.546147
R-HSA-2871796	FCERI mediated MAPK activation	13	0.268974	0.813391	0.686589	0.826414	0.551179
R-HSA-6806003	Regulation of TP53 Expression and Degradation	20	0.239777	0.820678	0.689189	0.827537	0.551929
R-HSA-76071	RNA Polymerase III Transcription Initiation From Type 3 Promoter	12	-0.222704	-0.821815	0.690554	0.827537	0.551929
R-HSA-2129379	Molecules associated with elastic fibres	12	-0.22184	-0.818629	0.690554	0.827537	0.551929
R-HSA-8874081	MET activates PTK2 signaling	10	0.28813	0.803613	0.69163	0.827537	0.551929
R-HSA-4086398	Ca2+ pathway	18	-0.193251	-0.839823	0.692593	0.827537	0.551929
R-HSA-1236394	Signaling by ERBB4	23	0.230917	0.81967	0.693316	0.827537	0.551929
R-HSA-512988	Interleukin-3, Interleukin-5 and GM-CSF signaling	14	0.25539	0.79071	0.703438	0.83837	0.559153
R-HSA-6794362	Protein-protein interactions at synapses	25	-0.170194	-0.818783	0.704348	0.83837	0.559153
R-HSA-187687	Signalling to ERKs	13	0.258538	0.781832	0.71137	0.845554	0.563945
R-HSA-163125	Post-translational modification: synthesis of GPI-anchored proteins	30	0.20972	0.805151	0.712484	0.845705	0.564046
R-HSA-5663205	Infectious disease	176	-0.105288	-0.94775	0.72	0.85142	0.567858
R-HSA-168253	Host Interactions with Influenza Factors	17	0.236747	0.780984	0.720222	0.85142	0.567858
R-HSA-9609736	Assembly and cell surface presentation of NMDA receptors	16	-0.192978	-0.804616	0.72028	0.85142	0.567858
R-HSA-168276	NS1 Mediated Effects on Host Pathways	16	0.244118	0.788358	0.723464	0.854006	0.569582
R-HSA-2454202	Fc epsilon receptor (FCERI) signaling	57	0.182823	0.813083	0.725173	0.854291	0.569772
R-HSA-2173789	TGF-beta receptor signaling activates SMADs	21	0.225148	0.781164	0.725699	0.854291	0.569772
R-HSA-72163	mRNA Splicing - Major Pathway	79	0.174025	0.821316	0.727273	0.854969	0.570225
R-HSA-983168	Antigen processing: Ubiquitination & Proteasome degradation	110	0.167158	0.834453	0.732334	0.858053	0.572281
R-HSA-977444	GABA B receptor activation	12	-0.212335	-0.783551	0.732899	0.858053	0.572281
R-HSA-991365	Activation of GABAB receptors	12	-0.212335	-0.783551	0.732899	0.858053	0.572281
R-HSA-983169	Class I MHC mediated antigen processing & presentation	143	0.162848	0.840145	0.73499	0.858733	0.572735
R-HSA-8982491	Glycogen metabolism	17	-0.190477	-0.808531	0.735714	0.858733	0.572735
R-HSA-3928665	EPH-ephrin mediated repulsion of cells	20	0.22466	0.768936	0.736486	0.858733	0.572735
R-HSA-6802957	Oncogenic MAPK signaling	23	-0.166539	-0.780169	0.740586	0.86234	0.57514
R-HSA-187037	Signaling by NTRK1 (TRKA)	31	-0.149312	-0.797571	0.741627	0.86238	0.575167
R-HSA-6804758	Regulation of TP53 Activity through Acetylation	16	-0.18988	-0.791699	0.744755	0.864845	0.576811
R-HSA-9013507	NOTCH3 Activation and Transmission of Signal to the Nucleus	11	0.260181	0.753061	0.748555	0.868081	0.578969
R-HSA-5223345	Miscellaneous transport and binding events	11	-0.215693	-0.766081	0.751613	0.869556	0.579953
R-HSA-373752	Netrin-1 signaling	12	-0.207646	-0.766247	0.752443	0.869556	0.579953
R-HSA-5684264	MAP3K8 (TPL2)-dependent MAPK1/3 activation	10	0.268022	0.747529	0.753304	0.869556	0.579953
R-HSA-429914	Deadenylation-dependent mRNA decay	25	0.208044	0.759207	0.753886	0.869556	0.579953
R-HSA-390471	Association of TriC/CCT with target proteins during biosynthesis	18	-0.181589	-0.789144	0.759259	0.872656	0.58202
R-HSA-9639288	Amino acids regulate mTORC1	20	-0.164189	-0.753887	0.759542	0.872656	0.58202
R-HSA-9009391	Extra-nuclear estrogen signaling	34	0.192256	0.76284	0.76	0.872656	0.58202
R-HSA-2979096	NOTCH2 Activation and Transmission of Signal to the Nucleus	10	0.266126	0.742243	0.760646	0.872656	0.58202
R-HSA-168249	Innate Immune System	383	0.160281	0.880413	0.763	0.874186	0.583041
R-HSA-2426168	Activation of gene expression by SREBF (SREBP)	21	-0.163653	-0.753047	0.76494	0.875239	0.583743
R-HSA-9013694	Signaling by NOTCH4	39	-0.135062	-0.774112	0.77095	0.878938	0.58621
R-HSA-5173105	O-linked glycosylation	27	0.203355	0.756592	0.771208	0.878938	0.58621
R-HSA-1592230	Mitochondrial biogenesis	34	0.18909	0.750277	0.77125	0.878938	0.58621
R-HSA-8875878	MET promotes cell motility	13	0.24099	0.728765	0.772595	0.879301	0.586453
R-HSA-2672351	Stimuli-sensing channels	26	0.20269	0.748149	0.775353	0.88127	0.587766
R-HSA-8951664	Neddylation	89	-0.110825	-0.837598	0.781609	0.887204	0.591724
R-HSA-1489509	DAG and IP3 signaling	14	-0.194764	-0.771209	0.782895	0.887488	0.591913
R-HSA-5633008	TP53 Regulates Transcription of Cell Death Genes	23	0.205432	0.729206	0.794233	0.89839	0.599184
R-HSA-1226099	Signaling by FGFR in disease	26	0.199741	0.737263	0.794608	0.89839	0.599184
R-HSA-186797	Signaling by PDGF	14	0.229468	0.710452	0.796562	0.899411	0.599865
R-HSA-1566948	Elastic fibre formation	14	-0.191058	-0.756533	0.802632	0.905073	0.603641
R-HSA-983170	Antigen Presentation: Folding, assembly and peptide loading of class I MHC	19	0.207988	0.707464	0.804318	0.905783	0.604115
R-HSA-72172	mRNA Splicing	84	0.159619	0.757722	0.809313	0.910211	0.607068
R-HSA-2122948	Activated NOTCH1 Transmits Signal to the Nucleus	12	0.234575	0.694246	0.811511	0.911487	0.607919
R-HSA-5674135	MAP2K and MAPK activation	11	0.243207	0.703932	0.813584	0.91262	0.608675
R-HSA-167172	Transcription of the HIV genome	34	0.177252	0.703307	0.825	0.924216	0.616409
R-HSA-5607764	CLEC7A (Dectin-1) signaling	44	0.16932	0.713739	0.827295	0.924702	0.616733
R-HSA-6811438	Intra-Golgi traffic	17	-0.173565	-0.736743	0.828571	0.924702	0.616733
R-HSA-380972	Energy dependent regulation of mTOR by LKB1-AMPK	16	-0.170231	-0.709774	0.828671	0.924702	0.616733
R-HSA-5675221	Negative regulation of MAPK pathway	20	0.201086	0.68825	0.831081	0.925067	0.616977
R-HSA-399719	Trafficking of AMPA receptors	14	-0.1813	-0.717896	0.832237	0.925067	0.616977
R-HSA-399721	Glutamate binding, activation of AMPA receptors and synaptic plasticity	14	-0.1813	-0.717896	0.832237	0.925067	0.616977
R-HSA-3322077	Glycogen synthesis	10	0.239708	0.668561	0.837004	0.929162	0.619707
R-HSA-2871837	FCERI mediated NF-kB activation	36	0.166887	0.674918	0.841076	0.932473	0.621916
R-HSA-8878166	Transcriptional regulation by RUNX2	58	0.159746	0.714335	0.844828	0.935423	0.623883
R-HSA-418346	Platelet homeostasis	23	-0.146936	-0.688337	0.849372	0.938879	0.626188
R-HSA-2559585	Oncogene Induced Senescence	15	0.20516	0.653274	0.85014	0.938879	0.626188
R-HSA-8864260	Transcriptional regulation by the AP-2 (TFAP2) family of transcription factors	11	-0.200834	-0.713307	0.851613	0.939295	0.626466
R-HSA-6791312	TP53 Regulates Transcription of Cell Cycle Genes	24	0.180742	0.65425	0.859922	0.947241	0.631765
R-HSA-5689603	UCH proteinases	47	0.159759	0.682501	0.863962	0.949739	0.633432
R-HSA-109581	Apoptosis	67	-0.105486	-0.740796	0.864407	0.949739	0.633432
R-HSA-9022692	Regulation of MECP2 expression and activity	14	-0.170298	-0.674331	0.868421	0.952928	0.635559
R-HSA-111465	Apoptotic cleavage of cellular proteins	13	-0.177268	-0.682454	0.870253	0.953717	0.636085
R-HSA-5633007	Regulation of TP53 Activity	72	-0.103248	-0.708213	0.872549	0.955012	0.636948
R-HSA-6796648	TP53 Regulates Transcription of DNA Repair Genes	25	0.176853	0.645381	0.874352	0.955765	0.637451
R-HSA-74158	RNA Polymerase III Transcription	18	-0.155841	-0.677248	0.877778	0.956761	0.638115
R-HSA-749476	RNA Polymerase III Abortive And Retractive Initiation	18	-0.155841	-0.677248	0.877778	0.956761	0.638115
R-HSA-450531	Regulation of mRNA stability by proteins that bind AU-rich elements	43	-0.122021	-0.72835	0.878613	0.956761	0.638115
R-HSA-3700989	Transcriptional Regulation by TP53	174	-0.0933956	-0.8299	0.884615	0.958061	0.638982
R-HSA-983712	Ion channel transport	52	0.149249	0.65241	0.88538	0.958061	0.638982
R-HSA-76046	RNA Polymerase III Transcription Initiation	17	-0.154718	-0.656741	0.885714	0.958061	0.638982
R-HSA-6802946	Signaling by moderate kinase activity BRAF mutants	15	0.193993	0.617716	0.887955	0.958061	0.638982
R-HSA-6802949	Signaling by RAS mutants	15	0.193993	0.617716	0.887955	0.958061	0.638982
R-HSA-6802955	Paradoxical activation of RAF signaling by kinase inactive BRAF	15	0.193993	0.617716	0.887955	0.958061	0.638982
R-HSA-9649948	Signaling downstream of RAS mutants	15	0.193993	0.617716	0.887955	0.958061	0.638982
R-HSA-163685	Integration of energy metabolism	34	0.156735	0.621897	0.88875	0.958061	0.638982
R-HSA-8956319	Nucleobase catabolism	12	-0.172513	-0.636602	0.895765	0.962433	0.641898
R-HSA-5673000	RAF activation	12	-0.174791	-0.645008	0.895765	0.962433	0.641898
R-HSA-8939902	Regulation of RUNX2 expression and activity	40	-0.114074	-0.669621	0.896175	0.962433	0.641898
R-HSA-1655829	Regulation of cholesterol biosynthesis by SREBP (SREBF)	29	-0.127623	-0.65189	0.902778	0.967178	0.645062
R-HSA-5576891	Cardiac conduction	25	0.167385	0.610832	0.90285	0.967178	0.645062
R-HSA-73762	RNA Polymerase I Transcription Initiation	20	-0.144945	-0.665528	0.90458	0.967226	0.645095
R-HSA-381119	Unfolded Protein Response (UPR)	51	0.144411	0.629404	0.905152	0.967226	0.645095
R-HSA-418597	G alpha (z) signalling events	16	0.191271	0.617695	0.907821	0.96887	0.646191
R-HSA-2871809	FCERI mediated Ca+2 mobilization	12	0.201634	0.596752	0.910791	0.970831	0.647499
R-HSA-5687128	MAPK6/MAPK4 signaling	38	-0.119098	-0.672877	0.914773	0.973401	0.649213
R-HSA-202403	TCR signaling	39	0.148607	0.612295	0.91616	0.973401	0.649213
R-HSA-69231	Cyclin D associated events in G1	20	-0.139417	-0.640144	0.919847	0.973401	0.649213
R-HSA-69236	G1 Phase	20	-0.139417	-0.640144	0.919847	0.973401	0.649213
R-HSA-9615710	Microautophagy	14	0.192595	0.596291	0.921203	0.973401	0.649213
R-HSA-112315	Transmission across Chemical Synapses	94	0.128568	0.625215	0.925081	0.973401	0.649213
R-HSA-112382	Formation of RNA Pol II elongation complex	25	-0.130791	-0.629217	0.926087	0.973401	0.649213
R-HSA-75955	RNA Polymerase II Transcription Elongation	25	-0.130791	-0.629217	0.926087	0.973401	0.649213
R-HSA-204998	Cell death signalling via NRAGE, NRIF and NADE	20	0.173221	0.592878	0.927027	0.973401	0.649213
R-HSA-4090294	SUMOylation of intracellular receptors	12	0.193465	0.572577	0.928058	0.973401	0.649213
R-HSA-73863	RNA Polymerase I Transcription Termination	16	-0.144844	-0.603924	0.93007	0.973401	0.649213
R-HSA-9612973	Autophagy	49	-0.109642	-0.672808	0.931677	0.973401	0.649213
R-HSA-442742	CREB1 phosphorylation through NMDA receptor-mediated activation of RAS signaling	12	0.19053	0.563889	0.933813	0.973401	0.649213
R-HSA-167161	HIV Transcription Initiation	25	-0.126811	-0.610074	0.934783	0.973401	0.649213
R-HSA-167162	RNA Polymerase II HIV Promoter Escape	25	-0.126811	-0.610074	0.934783	0.973401	0.649213
R-HSA-73776	RNA Polymerase II Promoter Escape	25	-0.126811	-0.610074	0.934783	0.973401	0.649213
R-HSA-73779	RNA Polymerase II Transcription Pre-Initiation And Promoter Opening	25	-0.126811	-0.610074	0.934783	0.973401	0.649213
R-HSA-75953	RNA Polymerase II Transcription Initiation	25	-0.126811	-0.610074	0.934783	0.973401	0.649213
R-HSA-76042	RNA Polymerase II Transcription Initiation And Promoter Clearance	25	-0.126811	-0.610074	0.934783	0.973401	0.649213
R-HSA-977443	GABA receptor activation	16	-0.140008	-0.583758	0.940559	0.977287	0.651804
R-HSA-114452	Activation of BH3-only proteins	15	0.171965	0.547574	0.941176	0.977287	0.651804
R-HSA-381676	Glucagon-like Peptide-1 (GLP1) regulates insulin secretion	11	-0.16728	-0.594131	0.941935	0.977287	0.651804
R-HSA-6806834	Signaling by MET	27	0.143723	0.534729	0.946015	0.980333	0.653836
R-HSA-8856825	Cargo recognition for clathrin-mediated endocytosis	42	0.138025	0.577954	0.949701	0.982963	0.65559
R-HSA-202424	Downstream TCR signaling	36	0.133152	0.538489	0.9511	0.983161	0.655722
R-HSA-75153	Apoptotic execution phase	18	0.154354	0.516722	0.952186	0.983161	0.655722
R-HSA-674695	RNA Polymerase II Pre-transcription Events	38	0.128387	0.529296	0.955206	0.983819	0.656161
R-HSA-389356	CD28 co-stimulation	10	0.188627	0.526091	0.955947	0.983819	0.656161
R-HSA-6804756	Regulation of TP53 Activity through Phosphorylation	40	-0.102672	-0.602687	0.956284	0.983819	0.656161
R-HSA-9029569	NR1H3 & NR1H2 regulate gene expression linked to cholesterol transport and efflux	10	0.187673	0.523432	0.957416	0.983819	0.656161
R-HSA-8953750	Transcriptional Regulation by E2F6	20	0.152972	0.523572	0.960811	0.986126	0.6577
R-HSA-8853659	RET signaling	14	0.163438	0.506016	0.964183	0.987222	0.658431
R-HSA-450282	MAPK targets/ Nuclear events mediated by MAP kinases	14	0.165698	0.513013	0.964183	0.987222	0.658431
R-HSA-397014	Muscle contraction	44	0.131346	0.553666	0.967391	0.989325	0.659834
R-HSA-5663202	Diseases of signal transduction	147	0.114209	0.591056	0.970072	0.990331	0.660505
R-HSA-112316	Neuronal System	120	0.11411	0.577441	0.971459	0.990331	0.660505
R-HSA-162906	HIV Infection	103	-0.0797996	-0.617763	0.972973	0.990331	0.660505
R-HSA-4641263	Regulation of FZD by ubiquitination	10	0.174815	0.487571	0.973568	0.990331	0.660505
R-HSA-162587	HIV Life Cycle	68	0.115535	0.529619	0.974157	0.990331	0.660505
R-HSA-6802952	Signaling by BRAF and RAF fusions	22	-0.1233	-0.568992	0.975309	0.990331	0.660505
R-HSA-166520	Signaling by NTRKs	37	-0.0944675	-0.519404	0.977273	0.990614	0.660693
R-HSA-68886	M Phase	139	0.109925	0.565599	0.979275	0.990614	0.660693
R-HSA-162599	Late Phase of HIV Life Cycle	62	0.115854	0.521438	0.980571	0.990614	0.660693
R-HSA-1483257	Phospholipid metabolism	64	0.110975	0.503976	0.980813	0.990614	0.660693
R-HSA-8878159	Transcriptional regulation by RUNX3	49	-0.0972571	-0.596807	0.981366	0.990614	0.660693
R-HSA-109606	Intrinsic Pathway for Apoptosis	21	0.135623	0.470553	0.985353	0.993468	0.662596
R-HSA-1236975	Antigen processing-Cross presentation	48	0.104138	0.445755	0.990453	0.997437	0.665244
R-HSA-1632852	Macroautophagy	40	0.096127	0.396839	0.996337	1	0.666953
R-HSA-1643685	Disease	424	0.100652	0.556234	0.997003	1	0.666953
R-HSA-1236974	ER-Phagosome pathway	44	0.087423	0.368516	0.997585	1	0.666953
R-HSA-5357801	Programmed Cell Death	69	0.092675	0.426174	0.997758	1	0.666953
R-HSA-6807070	PTEN Regulation	60	0.0867207	0.388128	1	1	0.666953
R-HSA-264876	Insulin processing	11	0.11145	0.322578	1	1	0.666953

## Sheet: GO
ontology	node_id	node_name	raw_p_overrep	FWER_overrep
cellular_component	GO:0043227	membrane-bounded organelle	6.83567e-147	0
cellular_component	GO:0005622	intracellular	2.64721e-138	0
cellular_component	GO:0043226	organelle	2.19917e-136	0
cellular_component	GO:0043231	intracellular membrane-bounded organelle	2.35953e-121	0
cellular_component	GO:0043229	intracellular organelle	6.49971e-116	0
cellular_component	GO:0005737	cytoplasm	4.72442e-114	0
biological_process	GO:0044237	cellular metabolic process	9.70277e-81	0
cellular_component	GO:0031974	membrane-enclosed lumen	5.94672e-77	0
cellular_component	GO:0043233	organelle lumen	5.94672e-77	0
cellular_component	GO:0070013	intracellular organelle lumen	5.94672e-77	0
cellular_component	GO:0005654	nucleoplasm	3.60961e-67	0
biological_process	GO:0044238	primary metabolic process	5.68346e-61	0
cellular_component	GO:0005829	cytosol	3.26022e-56	0
biological_process	GO:0006807	nitrogen compound metabolic process	9.26537e-54	0
biological_process	GO:0044260	cellular macromolecule metabolic process	1.6398e-53	0
biological_process	GO:0008152	metabolic process	1.04972e-51	0
biological_process	GO:1901576	organic substance biosynthetic process	8.80592e-50	0
biological_process	GO:0009058	biosynthetic process	6.90129e-49	0
biological_process	GO:1901564	organonitrogen compound metabolic process	1.37505e-47	0
cellular_component	GO:0005739	mitochondrion	4.38843e-46	0
biological_process	GO:0044249	cellular biosynthetic process	3.08245e-45	0
molecular_function	GO:0005515	protein binding	2.14712e-44	0
cellular_component	GO:0005634	nucleus	2.39316e-44	0
cellular_component	GO:0031090	organelle membrane	8.6004e-44	0
cellular_component	GO:0031981	nuclear lumen	2.20633e-41	0
biological_process	GO:0071704	organic substance metabolic process	3.06735e-41	0
biological_process	GO:0055114	oxidation-reduction process	4.16726e-39	0
biological_process	GO:0033554	cellular response to stress	1.80619e-38	0
cellular_component	GO:0012505	endomembrane system	2.07976e-38	0
molecular_function	GO:0003824	catalytic activity	4.27988e-35	0
biological_process	GO:0044267	cellular protein metabolic process	6.33656e-35	0
biological_process	GO:0044271	cellular nitrogen compound biosynthetic process	1.32817e-34	0
cellular_component	GO:1902494	catalytic complex	8.01207e-34	0
biological_process	GO:0009059	macromolecule biosynthetic process	1.09792e-32	0
biological_process	GO:0009056	catabolic process	1.55051e-32	0
biological_process	GO:0034645	cellular macromolecule biosynthetic process	3.98858e-32	0
biological_process	GO:0044281	small molecule metabolic process	1.55416e-31	0
biological_process	GO:0044248	cellular catabolic process	2.12457e-31	0
biological_process	GO:1901575	organic substance catabolic process	2.34818e-31	0
biological_process	GO:0019538	protein metabolic process	2.50008e-31	0
biological_process	GO:1901362	organic cyclic compound biosynthetic process	4.53877e-31	0
biological_process	GO:0034641	cellular nitrogen compound metabolic process	6.20927e-31	0
biological_process	GO:0018130	heterocycle biosynthetic process	3.17928e-30	0
biological_process	GO:1901360	organic cyclic compound metabolic process	5.8248e-30	0
biological_process	GO:0031323	regulation of cellular metabolic process	7.85307e-30	0
cellular_component	GO:0043230	extracellular organelle	1.57631e-29	0
cellular_component	GO:0070062	extracellular exosome	3.15819e-29	0
cellular_component	GO:1903561	extracellular vesicle	3.4667e-29	0
biological_process	GO:0019438	aromatic compound biosynthetic process	6.35202e-29	0
biological_process	GO:0080090	regulation of primary metabolic process	1.24532e-28	0
biological_process	GO:0010033	response to organic substance	2.57747e-28	0
biological_process	GO:0006793	phosphorus metabolic process	5.86569e-28	0
biological_process	GO:0034654	nucleobase-containing compound biosynthetic process	6.01744e-28	0
biological_process	GO:0071840	cellular component organization or biogenesis	6.06503e-28	0
molecular_function	GO:0005488	binding	7.46975e-28	0
cellular_component	GO:0031982	vesicle	1.06962e-27	0
biological_process	GO:0006796	phosphate-containing compound metabolic process	2.09085e-27	0
biological_process	GO:0006725	cellular aromatic compound metabolic process	5.61193e-27	0
biological_process	GO:0043412	macromolecule modification	5.63007e-27	0
biological_process	GO:0051171	regulation of nitrogen compound metabolic process	7.36417e-27	0
biological_process	GO:0046483	heterocycle metabolic process	9.10242e-27	0
biological_process	GO:0006464	cellular protein modification process	2.8354e-26	0
biological_process	GO:0036211	protein modification process	2.8354e-26	0
molecular_function	GO:0016491	oxidoreductase activity	5.00112e-26	0
cellular_component	GO:0031967	organelle envelope	5.28749e-26	0
cellular_component	GO:0031975	envelope	5.28749e-26	0
cellular_component	GO:0005759	mitochondrial matrix	1.22422e-25	0
biological_process	GO:0016032	viral process	1.31124e-25	0
biological_process	GO:0070887	cellular response to chemical stimulus	2.02639e-25	0
cellular_component	GO:0110165	cellular anatomical entity	2.03458e-25	0
biological_process	GO:0006950	response to stress	2.1555e-25	0
biological_process	GO:0016043	cellular component organization	4.31298e-25	0
biological_process	GO:0044403	symbiotic process	1.24595e-24	0
biological_process	GO:0051641	cellular localization	1.41121e-24	0
biological_process	GO:0006139	nucleobase-containing compound metabolic process	8.6735e-24	0
biological_process	GO:0070727	cellular macromolecule localization	1.16096e-23	0
biological_process	GO:0051252	regulation of RNA metabolic process	1.94595e-23	0
biological_process	GO:0043436	oxoacid metabolic process	2.1561e-23	0
biological_process	GO:0019219	regulation of nucleobase-containing compound metabolic process	2.6401e-23	0
biological_process	GO:0034613	cellular protein localization	4.98864e-23	0
biological_process	GO:0019752	carboxylic acid metabolic process	9.42448e-23	0
biological_process	GO:0033036	macromolecule localization	1.24611e-22	0
biological_process	GO:0006082	organic acid metabolic process	2.11661e-22	0
biological_process	GO:0034097	response to cytokine	3.6414e-22	0
biological_process	GO:0009889	regulation of biosynthetic process	5.39386e-22	0
biological_process	GO:0009057	macromolecule catabolic process	8.49917e-22	0
biological_process	GO:0032774	RNA biosynthetic process	1.26462e-21	0
biological_process	GO:0006996	organelle organization	1.34736e-21	0
biological_process	GO:0097659	nucleic acid-templated transcription	2.85532e-21	0
biological_process	GO:0008104	protein localization	3.71819e-21	0
biological_process	GO:0006351	transcription, DNA-templated	3.7919e-21	0
cellular_component	GO:0005740	mitochondrial envelope	6.56992e-21	0
biological_process	GO:0031326	regulation of cellular biosynthetic process	7.41941e-21	0
biological_process	GO:0071310	cellular response to organic substance	2.90566e-20	0
biological_process	GO:2001141	regulation of RNA biosynthetic process	4.05338e-20	0
biological_process	GO:0010556	regulation of macromolecule biosynthetic process	4.46485e-20	0
biological_process	GO:1903506	regulation of nucleic acid-templated transcription	4.91122e-20	0
biological_process	GO:0071345	cellular response to cytokine stimulus	5.64915e-20	0
biological_process	GO:0044265	cellular macromolecule catabolic process	6.0051e-20	0
molecular_function	GO:1901363	heterocyclic compound binding	8.81644e-20	0
biological_process	GO:2000112	regulation of cellular macromolecule biosynthetic process	1.17681e-19	0
cellular_component	GO:0031966	mitochondrial membrane	1.28223e-19	0
biological_process	GO:0006355	regulation of transcription, DNA-templated	2.06878e-19	0
biological_process	GO:0051649	establishment of localization in cell	2.99221e-19	0
biological_process	GO:0006091	generation of precursor metabolites and energy	3.32696e-19	0
biological_process	GO:0043170	macromolecule metabolic process	6.66115e-19	0
molecular_function	GO:0097159	organic cyclic compound binding	7.23223e-19	0
cellular_component	GO:0005789	endoplasmic reticulum membrane	1.0467e-18	0
biological_process	GO:0090304	nucleic acid metabolic process	1.46576e-18	0
cellular_component	GO:0042175	nuclear outer membrane-endoplasmic reticulum membrane network	1.96862e-18	0
cellular_component	GO:0005783	endoplasmic reticulum	3.28827e-18	0
biological_process	GO:0019222	regulation of metabolic process	3.3962e-18	0
cellular_component	GO:0098588	bounding membrane of organelle	3.5257e-18	0
biological_process	GO:1901565	organonitrogen compound catabolic process	4.71997e-18	0
cellular_component	GO:0005743	mitochondrial inner membrane	7.01708e-18	0
biological_process	GO:0016310	phosphorylation	8.01869e-18	0
cellular_component	GO:1990234	transferase complex	9.60819e-18	0
biological_process	GO:0045333	cellular respiration	2.56737e-17	0
cellular_component	GO:0019866	organelle inner membrane	2.58674e-17	0
biological_process	GO:0006886	intracellular protein transport	5.60095e-17	0
biological_process	GO:0006366	transcription by RNA polymerase II	5.62956e-17	0
biological_process	GO:1901566	organonitrogen compound biosynthetic process	6.41689e-17	0
biological_process	GO:0046907	intracellular transport	1.43268e-16	0
biological_process	GO:0016070	RNA metabolic process	2.61527e-16	0
cellular_component	GO:0098798	mitochondrial protein complex	2.84431e-16	0
biological_process	GO:0006357	regulation of transcription by RNA polymerase II	2.92944e-16	0
biological_process	GO:0009987	cellular process	3.01122e-16	0
biological_process	GO:0006974	cellular response to DNA damage stimulus	4.0501e-16	0
biological_process	GO:0048523	negative regulation of cellular process	7.00411e-16	0
biological_process	GO:0045184	establishment of protein localization	7.87326e-16	0
biological_process	GO:0015980	energy derivation by oxidation of organic compounds	8.06796e-16	0
biological_process	GO:0044283	small molecule biosynthetic process	1.6693e-15	0
biological_process	GO:0032787	monocarboxylic acid metabolic process	1.75923e-15	0
molecular_function	GO:0048037	cofactor binding	1.96023e-15	0
biological_process	GO:0031325	positive regulation of cellular metabolic process	2.15357e-15	0
biological_process	GO:0044419	interspecies interaction between organisms	2.54143e-15	0
biological_process	GO:1901700	response to oxygen-containing compound	3.06026e-15	0
biological_process	GO:0015031	protein transport	3.31292e-15	0
cellular_component	GO:0097708	intracellular vesicle	3.57025e-15	0
cellular_component	GO:0005773	vacuole	3.66596e-15	0
cellular_component	GO:0031410	cytoplasmic vesicle	3.71928e-15	0
biological_process	GO:1901135	carbohydrate derivative metabolic process	4.45193e-15	0
cellular_component	GO:0098805	whole membrane	5.75936e-15	0
biological_process	GO:0071705	nitrogen compound transport	6.64987e-15	0
biological_process	GO:0051173	positive regulation of nitrogen compound metabolic process	6.96112e-15	0
biological_process	GO:0043933	protein-containing complex subunit organization	7.32485e-15	0
biological_process	GO:0007049	cell cycle	7.33547e-15	0
biological_process	GO:0044257	cellular protein catabolic process	8.88872e-15	0
molecular_function	GO:0043167	ion binding	8.91124e-15	0
molecular_function	GO:0019899	enzyme binding	9.6417e-15	0
biological_process	GO:0009893	positive regulation of metabolic process	1.03567e-14	0
biological_process	GO:0009615	response to virus	1.11323e-14	0
biological_process	GO:0042886	amide transport	1.25466e-14	0
biological_process	GO:0051186	cofactor metabolic process	1.37322e-14	0
biological_process	GO:0033365	protein localization to organelle	1.4197e-14	0
biological_process	GO:0030163	protein catabolic process	1.49657e-14	0
biological_process	GO:0015833	peptide transport	1.56362e-14	0
biological_process	GO:0016071	mRNA metabolic process	1.84827e-14	0
biological_process	GO:0022900	electron transport chain	2.52698e-14	0
biological_process	GO:0051179	localization	2.82324e-14	0
biological_process	GO:0048522	positive regulation of cellular process	3.01269e-14	0
biological_process	GO:0072594	establishment of protein localization to organelle	3.34914e-14	0
biological_process	GO:0071702	organic substance transport	4.6404e-14	0
biological_process	GO:0009894	regulation of catabolic process	5.89855e-14	0
molecular_function	GO:0000166	nucleotide binding	6.00607e-14	0
molecular_function	GO:1901265	nucleoside phosphate binding	6.75718e-14	0
molecular_function	GO:0042802	identical protein binding	7.13769e-14	0
biological_process	GO:0097190	apoptotic signaling pathway	9.20305e-14	0
biological_process	GO:0018193	peptidyl-amino acid modification	1.10773e-13	0
biological_process	GO:0060255	regulation of macromolecule metabolic process	1.16724e-13	0
biological_process	GO:0006629	lipid metabolic process	1.35829e-13	0
cellular_component	GO:0000323	lytic vacuole	1.36203e-13	0
biological_process	GO:0050792	regulation of viral process	1.53018e-13	0
cellular_component	GO:0005764	lysosome	2.05252e-13	0
biological_process	GO:0043903	regulation of symbiosis, encompassing mutualism through parasitism	2.28567e-13	0
biological_process	GO:0000122	negative regulation of transcription by RNA polymerase II	2.36229e-13	0
biological_process	GO:0007005	mitochondrion organization	2.50733e-13	0
biological_process	GO:0051254	positive regulation of RNA metabolic process	3.14369e-13	0
biological_process	GO:0010604	positive regulation of macromolecule metabolic process	3.58523e-13	0
biological_process	GO:0051234	establishment of localization	4.12356e-13	0
biological_process	GO:0043603	cellular amide metabolic process	4.45295e-13	0
biological_process	GO:0019439	aromatic compound catabolic process	5.02294e-13	0
biological_process	GO:0045935	positive regulation of nucleobase-containing compound metabolic process	5.20901e-13	0
biological_process	GO:1901361	organic cyclic compound catabolic process	5.23191e-13	0
biological_process	GO:0006810	transport	6.81767e-13	0
biological_process	GO:0048518	positive regulation of biological process	7.13965e-13	0
biological_process	GO:0051726	regulation of cell cycle	7.62597e-13	0
biological_process	GO:0051128	regulation of cellular component organization	1.07854e-12	0
biological_process	GO:0010557	positive regulation of macromolecule biosynthetic process	1.09481e-12	0
biological_process	GO:0006915	apoptotic process	1.59397e-12	0
biological_process	GO:0031324	negative regulation of cellular metabolic process	1.70365e-12	0
biological_process	GO:0051253	negative regulation of RNA metabolic process	2.18515e-12	0
biological_process	GO:0044255	cellular lipid metabolic process	2.37988e-12	0
biological_process	GO:1903507	negative regulation of nucleic acid-templated transcription	2.41189e-12	0
biological_process	GO:0051172	negative regulation of nitrogen compound metabolic process	2.78347e-12	0
biological_process	GO:1902679	negative regulation of RNA biosynthetic process	3.16961e-12	0
biological_process	GO:0051246	regulation of protein metabolic process	3.21492e-12	0
molecular_function	GO:0036094	small molecule binding	3.37541e-12	0
biological_process	GO:1902680	positive regulation of RNA biosynthetic process	3.65592e-12	0
biological_process	GO:0045892	negative regulation of transcription, DNA-templated	4.47499e-12	0
biological_process	GO:1903508	positive regulation of nucleic acid-templated transcription	4.79033e-12	0
biological_process	GO:0019637	organophosphate metabolic process	5.96772e-12	0
molecular_function	GO:0008134	transcription factor binding	5.97968e-12	0
biological_process	GO:0046700	heterocycle catabolic process	7.25213e-12	0
cellular_component	GO:0016604	nuclear body	7.40525e-12	0
biological_process	GO:0051603	proteolysis involved in cellular protein catabolic process	1.01441e-11	0
biological_process	GO:0019083	viral transcription	1.02924e-11	0
cellular_component	GO:0005746	mitochondrial respirasome	1.11384e-11	0
cellular_component	GO:0005925	focal adhesion	1.11408e-11	0
biological_process	GO:0080134	regulation of response to stress	1.16922e-11	0
biological_process	GO:0031329	regulation of cellular catabolic process	1.24506e-11	0
biological_process	GO:0045786	negative regulation of cell cycle	1.24778e-11	0
biological_process	GO:0070647	protein modification by small protein conjugation or removal	1.30255e-11	0
cellular_component	GO:0070469	respirasome	1.31007e-11	0
biological_process	GO:0035556	intracellular signal transduction	1.31977e-11	0
cellular_component	GO:0016607	nuclear speck	1.35692e-11	0
biological_process	GO:0065003	protein-containing complex assembly	1.35933e-11	0
biological_process	GO:0034340	response to type I interferon	1.84734e-11	0
biological_process	GO:0031328	positive regulation of cellular biosynthetic process	1.96991e-11	0
biological_process	GO:2001233	regulation of apoptotic signaling pathway	2.13666e-11	0
biological_process	GO:0009719	response to endogenous stimulus	2.53919e-11	0
biological_process	GO:0051607	defense response to virus	2.721e-11	0
biological_process	GO:0002252	immune effector process	2.74949e-11	0
biological_process	GO:0044270	cellular nitrogen compound catabolic process	2.94228e-11	0
biological_process	GO:0045055	regulated exocytosis	3.47583e-11	0
molecular_function	GO:0016740	transferase activity	3.62669e-11	0
biological_process	GO:0009628	response to abiotic stimulus	3.63783e-11	0
biological_process	GO:0022904	respiratory electron transport chain	3.72482e-11	0
biological_process	GO:0019221	cytokine-mediated signaling pathway	4.02911e-11	0
biological_process	GO:0051090	regulation of DNA-binding transcription factor activity	4.05759e-11	0
molecular_function	GO:0016655	oxidoreductase activity, acting on NAD(P)H, quinone or similar compound as acceptor	4.14212e-11	0
biological_process	GO:0009891	positive regulation of biosynthetic process	4.25333e-11	0
biological_process	GO:0044085	cellular component biogenesis	4.37203e-11	0
biological_process	GO:0006631	fatty acid metabolic process	4.479e-11	0
biological_process	GO:0065009	regulation of molecular function	4.79097e-11	0
biological_process	GO:1901698	response to nitrogen compound	5.24812e-11	0
biological_process	GO:0009636	response to toxic substance	5.40071e-11	0
biological_process	GO:0034655	nucleobase-containing compound catabolic process	5.4084e-11	0
cellular_component	GO:0030055	cell-substrate junction	5.85879e-11	0
biological_process	GO:0010243	response to organonitrogen compound	6.8071e-11	0
biological_process	GO:0045934	negative regulation of nucleobase-containing compound metabolic process	7.35445e-11	0
biological_process	GO:0019058	viral life cycle	8.13755e-11	0
biological_process	GO:0048519	negative regulation of biological process	8.65333e-11	0
biological_process	GO:0042775	mitochondrial ATP synthesis coupled electron transport	8.86494e-11	0
biological_process	GO:0002444	myeloid leukocyte mediated immunity	9.81504e-11	0
biological_process	GO:0044282	small molecule catabolic process	1.04471e-10	0
biological_process	GO:0060337	type I interferon signaling pathway	1.09142e-10	0
biological_process	GO:0071357	cellular response to type I interferon	1.09142e-10	0
cellular_component	GO:0005766	primary lysosome	1.35901e-10	0
cellular_component	GO:0042582	azurophil granule	1.35901e-10	0
biological_process	GO:0002274	myeloid leukocyte activation	1.37242e-10	0
biological_process	GO:0008219	cell death	1.39182e-10	0
biological_process	GO:0006887	exocytosis	1.41829e-10	0
biological_process	GO:0009966	regulation of signal transduction	1.48041e-10	0
biological_process	GO:0034976	response to endoplasmic reticulum stress	1.49412e-10	0
biological_process	GO:1903047	mitotic cell cycle process	1.51787e-10	0
biological_process	GO:0042773	ATP synthesis coupled electron transport	1.5544e-10	0
biological_process	GO:0002263	cell activation involved in immune response	1.79464e-10	0
molecular_function	GO:0003723	RNA binding	1.85043e-10	0
biological_process	GO:0009890	negative regulation of biosynthetic process	1.85244e-10	0
cellular_component	GO:0005794	Golgi apparatus	1.88131e-10	0
biological_process	GO:0006979	response to oxidative stress	2.03066e-10	0
biological_process	GO:0080135	regulation of cellular response to stress	2.09461e-10	0
molecular_function	GO:0050662	coenzyme binding	2.1184e-10	0
biological_process	GO:0042981	regulation of apoptotic process	2.22025e-10	0
molecular_function	GO:0003676	nucleic acid binding	2.22176e-10	0
biological_process	GO:0031327	negative regulation of cellular biosynthetic process	2.3872e-10	0
molecular_function	GO:0016651	oxidoreductase activity, acting on NAD(P)H	2.53862e-10	0
biological_process	GO:0002366	leukocyte activation involved in immune response	2.58635e-10	0
cellular_component	GO:0010008	endosome membrane	2.64171e-10	0
biological_process	GO:0045893	positive regulation of transcription, DNA-templated	2.71033e-10	0
biological_process	GO:0032268	regulation of cellular protein metabolic process	2.7591e-10	0
biological_process	GO:0042221	response to chemical	2.79868e-10	0
biological_process	GO:0019080	viral gene expression	2.84704e-10	0
biological_process	GO:0000278	mitotic cell cycle	3.01373e-10	0
biological_process	GO:0045944	positive regulation of transcription by RNA polymerase II	3.01681e-10	0
biological_process	GO:0043067	regulation of programmed cell death	3.42476e-10	0
biological_process	GO:0010941	regulation of cell death	3.75538e-10	0
cellular_component	GO:0101002	ficolin-1-rich granule	4.13386e-10	0
cellular_component	GO:1904813	ficolin-1-rich granule lumen	4.13386e-10	0
biological_process	GO:0006508	proteolysis	4.27552e-10	0
biological_process	GO:0012501	programmed cell death	4.38016e-10	0
biological_process	GO:0009060	aerobic respiration	4.43782e-10	0
biological_process	GO:0033993	response to lipid	4.90609e-10	0
biological_process	GO:0051716	cellular response to stimulus	5.26469e-10	0
cellular_component	GO:0098803	respiratory chain complex	5.44759e-10	0
biological_process	GO:0005975	carbohydrate metabolic process	5.47485e-10	0
biological_process	GO:0048585	negative regulation of response to stimulus	6.72991e-10	0
biological_process	GO:0002275	myeloid cell activation involved in immune response	6.85457e-10	0
biological_process	GO:0016570	histone modification	7.16835e-10	0
biological_process	GO:0065008	regulation of biological quality	7.40127e-10	0
cellular_component	GO:0032991	protein-containing complex	7.60679e-10	0
molecular_function	GO:0009055	electron transfer activity	8.03706e-10	0
biological_process	GO:0006732	coenzyme metabolic process	9.33973e-10	0
biological_process	GO:0097193	intrinsic apoptotic signaling pathway	9.71959e-10	0
biological_process	GO:0010558	negative regulation of macromolecule biosynthetic process	1.01146e-09	0
biological_process	GO:0002009	morphogenesis of an epithelium	1.01552e-09	0
biological_process	GO:0043299	leukocyte degranulation	1.02192e-09	0
molecular_function	GO:0046872	metal ion binding	1.03778e-09	0
biological_process	GO:0006401	RNA catabolic process	1.16887e-09	0
biological_process	GO:0070646	protein modification by small protein removal	1.41879e-09	0
cellular_component	GO:1990204	oxidoreductase complex	1.42509e-09	0
biological_process	GO:0022402	cell cycle process	1.44324e-09	0
cellular_component	GO:0005747	mitochondrial respiratory chain complex I	1.45736e-09	0
cellular_component	GO:0030964	NADH dehydrogenase complex	1.45736e-09	0
cellular_component	GO:0045271	respiratory chain complex I	1.45736e-09	0
biological_process	GO:0019941	modification-dependent protein catabolic process	1.82826e-09	0
biological_process	GO:0010498	proteasomal protein catabolic process	1.97132e-09	0
biological_process	GO:0032606	type I interferon production	2.0065e-09	0
molecular_function	GO:0017076	purine nucleotide binding	2.09307e-09	0
biological_process	GO:0140053	mitochondrial gene expression	2.13181e-09	0
biological_process	GO:0062197	cellular response to chemical stress	2.23534e-09	0
biological_process	GO:2000113	negative regulation of cellular macromolecule biosynthetic process	2.25317e-09	0
biological_process	GO:0008380	RNA splicing	2.41075e-09	0
biological_process	GO:0072331	signal transduction by p53 class mediator	2.5095e-09	0
biological_process	GO:0033108	mitochondrial respiratory chain complex assembly	2.52036e-09	0
biological_process	GO:0005996	monosaccharide metabolic process	2.56586e-09	0
cellular_component	GO:0034708	methyltransferase complex	2.87558e-09	0
biological_process	GO:0051188	cofactor biosynthetic process	2.91119e-09	0
molecular_function	GO:0140297	DNA-binding transcription factor binding	3.07104e-09	0
biological_process	GO:0006790	sulfur compound metabolic process	3.12742e-09	0
biological_process	GO:0042176	regulation of protein catabolic process	3.23807e-09	0
molecular_function	GO:0043169	cation binding	3.27557e-09	0
biological_process	GO:0014070	response to organic cyclic compound	3.31626e-09	0
biological_process	GO:0006518	peptide metabolic process	3.46413e-09	0
biological_process	GO:1902531	regulation of intracellular signal transduction	3.5128e-09	0
cellular_component	GO:0005768	endosome	3.56247e-09	0
biological_process	GO:0006402	mRNA catabolic process	3.757e-09	0
biological_process	GO:0010646	regulation of cell communication	4.0425e-09	0
biological_process	GO:0043632	modification-dependent macromolecule catabolic process	4.06532e-09	0
biological_process	GO:0044093	positive regulation of molecular function	4.15545e-09	0
biological_process	GO:0023051	regulation of signaling	4.15632e-09	0
biological_process	GO:0032940	secretion by cell	4.24242e-09	0
biological_process	GO:0009888	tissue development	4.31105e-09	0
biological_process	GO:0010628	positive regulation of gene expression	4.49947e-09	0
biological_process	GO:0010257	NADH dehydrogenase complex assembly	4.60582e-09	0
biological_process	GO:0032981	mitochondrial respiratory chain complex I assembly	4.60582e-09	0
biological_process	GO:0016054	organic acid catabolic process	4.6358e-09	0
biological_process	GO:0046395	carboxylic acid catabolic process	4.6358e-09	0
biological_process	GO:0032446	protein modification by small protein conjugation	5.00909e-09	0
cellular_component	GO:0044391	ribosomal subunit	6.24141e-09	0
biological_process	GO:0016569	covalent chromatin modification	6.31764e-09	0
biological_process	GO:0022607	cellular component assembly	7.40311e-09	0
biological_process	GO:0032479	regulation of type I interferon production	7.45352e-09	0
biological_process	GO:0009968	negative regulation of signal transduction	7.56964e-09	0
biological_process	GO:0006468	protein phosphorylation	7.62517e-09	0
biological_process	GO:0046903	secretion	7.79725e-09	0
molecular_function	GO:0061629	RNA polymerase II-specific DNA-binding transcription factor binding	8.2331e-09	0
cellular_component	GO:0005788	endoplasmic reticulum lumen	8.48624e-09	0
biological_process	GO:1990823	response to leukemia inhibitory factor	8.5776e-09	0
biological_process	GO:1990830	cellular response to leukemia inhibitory factor	8.5776e-09	0
biological_process	GO:0006511	ubiquitin-dependent protein catabolic process	8.73817e-09	0
biological_process	GO:0043312	neutrophil degranulation	9.01837e-09	0
molecular_function	GO:0032555	purine ribonucleotide binding	9.63772e-09	0
molecular_function	GO:0003712	transcription coregulator activity	1.00426e-08	0
biological_process	GO:0046034	ATP metabolic process	1.00503e-08	0
biological_process	GO:0036230	granulocyte activation	1.03092e-08	0
biological_process	GO:0072329	monocarboxylic acid catabolic process	1.03583e-08	0
biological_process	GO:0042119	neutrophil activation	1.0494e-08	0
biological_process	GO:1901701	cellular response to oxygen-containing compound	1.05158e-08	0
biological_process	GO:0097237	cellular response to toxic substance	1.10756e-08	0
biological_process	GO:0044770	cell cycle phase transition	1.14309e-08	0
biological_process	GO:0002446	neutrophil mediated immunity	1.25695e-08	0
molecular_function	GO:0032553	ribonucleotide binding	1.29612e-08	0
cellular_component	GO:0035097	histone methyltransferase complex	1.30337e-08	0
biological_process	GO:0031399	regulation of protein modification process	1.32765e-08	0
biological_process	GO:0140352	export from cell	1.40563e-08	0
biological_process	GO:0048729	tissue morphogenesis	1.45372e-08	0
cellular_component	GO:0000139	Golgi membrane	1.53104e-08	0
biological_process	GO:0002283	neutrophil activation involved in immune response	1.5602e-08	0
biological_process	GO:0040007	growth	1.69285e-08	0
cellular_component	GO:0034774	secretory granule lumen	1.72859e-08	0
biological_process	GO:0050896	response to stimulus	1.85021e-08	0
biological_process	GO:0006006	glucose metabolic process	1.91308e-08	0
biological_process	GO:0050790	regulation of catalytic activity	1.99347e-08	0
molecular_function	GO:0140110	transcription regulator activity	2.1525e-08	0
biological_process	GO:0006120	mitochondrial electron transport, NADH to ubiquinone	2.15492e-08	0
cellular_component	GO:0060205	cytoplasmic vesicle lumen	2.1674e-08	0
biological_process	GO:0050794	regulation of cellular process	2.20694e-08	0
biological_process	GO:0009725	response to hormone	2.2268e-08	0
biological_process	GO:0072657	protein localization to membrane	2.26472e-08	0
biological_process	GO:0010468	regulation of gene expression	2.57958e-08	0
cellular_component	GO:0099503	secretory vesicle	2.58886e-08	0
biological_process	GO:0048525	negative regulation of viral process	2.77437e-08	0
molecular_function	GO:0035639	purine ribonucleoside triphosphate binding	2.97271e-08	0
molecular_function	GO:0016627	oxidoreductase activity, acting on the CH-CH group of donors	3.02739e-08	0
biological_process	GO:0007166	cell surface receptor signaling pathway	3.09765e-08	0
molecular_function	GO:0030554	adenyl nucleotide binding	3.20858e-08	0
cellular_component	GO:0031983	vesicle lumen	3.35893e-08	0
biological_process	GO:0016579	protein deubiquitination	3.41304e-08	0
molecular_function	GO:0051287	NAD binding	3.46097e-08	0
biological_process	GO:0043604	amide biosynthetic process	3.48978e-08	0
biological_process	GO:0006635	fatty acid beta-oxidation	3.50668e-08	0
molecular_function	GO:0044389	ubiquitin-like protein ligase binding	3.59283e-08	0
biological_process	GO:0016567	protein ubiquitination	3.67002e-08	0
biological_process	GO:0006520	cellular amino acid metabolic process	3.74786e-08	0
biological_process	GO:0071495	cellular response to endogenous stimulus	4.14846e-08	0
biological_process	GO:0042770	signal transduction in response to DNA damage	4.1526e-08	0
biological_process	GO:1903900	regulation of viral life cycle	4.17896e-08	0
cellular_component	GO:0035578	azurophil granule lumen	4.39662e-08	0
biological_process	GO:0006066	alcohol metabolic process	4.75821e-08	0
biological_process	GO:0019318	hexose metabolic process	4.76382e-08	0
biological_process	GO:0023057	negative regulation of signaling	5.42454e-08	0
biological_process	GO:0009605	response to external stimulus	5.6047e-08	0
biological_process	GO:0045069	regulation of viral genome replication	5.60671e-08	0
cellular_component	GO:0005775	vacuolar lumen	5.70261e-08	0
biological_process	GO:0055086	nucleobase-containing small molecule metabolic process	5.78745e-08	0
cellular_component	GO:0005774	vacuolar membrane	5.99591e-08	0
molecular_function	GO:0003954	NADH dehydrogenase activity	6.10423e-08	0
molecular_function	GO:0008137	NADH dehydrogenase (ubiquinone) activity	6.10423e-08	0
molecular_function	GO:0050136	NADH dehydrogenase (quinone) activity	6.10423e-08	0
biological_process	GO:0009062	fatty acid catabolic process	6.3398e-08	0
cellular_component	GO:0030141	secretory granule	6.59538e-08	0
biological_process	GO:0006119	oxidative phosphorylation	6.72131e-08	0
biological_process	GO:0010648	negative regulation of cell communication	7.00732e-08	0
biological_process	GO:0070125	mitochondrial translational elongation	7.09585e-08	0
cellular_component	GO:0000313	organellar ribosome	7.20807e-08	0
cellular_component	GO:0005761	mitochondrial ribosome	7.20807e-08	0
biological_process	GO:0009991	response to extracellular stimulus	7.57727e-08	0
biological_process	GO:0046782	regulation of viral transcription	8.1338e-08	0
biological_process	GO:0030522	intracellular receptor signaling pathway	8.22684e-08	0
biological_process	GO:0090407	organophosphate biosynthetic process	8.54639e-08	0
biological_process	GO:0032543	mitochondrial translation	8.61709e-08	0
biological_process	GO:1903827	regulation of cellular protein localization	8.77253e-08	0
biological_process	GO:0044772	mitotic cell cycle phase transition	8.88232e-08	0
biological_process	GO:0034599	cellular response to oxidative stress	9.37208e-08	0
biological_process	GO:0042493	response to drug	9.52347e-08	0
biological_process	GO:0043161	proteasome-mediated ubiquitin-dependent protein catabolic process	9.88549e-08	0
biological_process	GO:0006415	translational termination	1.02049e-07	0
biological_process	GO:0035966	response to topologically incorrect protein	1.13502e-07	0
biological_process	GO:0006605	protein targeting	1.13868e-07	0
biological_process	GO:0062012	regulation of small molecule metabolic process	1.15895e-07	0
biological_process	GO:1901137	carbohydrate derivative biosynthetic process	1.23752e-07	0
molecular_function	GO:0032559	adenyl ribonucleotide binding	1.32578e-07	0
biological_process	GO:1901615	organic hydroxy compound metabolic process	1.39323e-07	0
biological_process	GO:0051247	positive regulation of protein metabolic process	1.52958e-07	0
biological_process	GO:0001101	response to acid chemical	1.56739e-07	0
molecular_function	GO:1990837	sequence-specific double-stranded DNA binding	1.78265e-07	0
biological_process	GO:0006753	nucleoside phosphate metabolic process	1.83772e-07	0
biological_process	GO:0030162	regulation of proteolysis	1.87269e-07	0
biological_process	GO:0043065	positive regulation of apoptotic process	1.92806e-07	0
biological_process	GO:0006099	tricarboxylic acid cycle	1.99388e-07	0
biological_process	GO:0097191	extrinsic apoptotic signaling pathway	2.08766e-07	0
biological_process	GO:0046685	response to arsenic-containing substance	2.12327e-07	0
biological_process	GO:0006986	response to unfolded protein	2.12847e-07	0
biological_process	GO:0006081	cellular aldehyde metabolic process	2.20104e-07	0
biological_process	GO:0006403	RNA localization	2.22814e-07	0
biological_process	GO:2001235	positive regulation of apoptotic signaling pathway	2.26335e-07	0
biological_process	GO:0034504	protein localization to nucleus	2.29736e-07	0
biological_process	GO:0046677	response to antibiotic	2.31806e-07	0
biological_process	GO:0061008	hepaticobiliary system development	2.44578e-07	0
cellular_component	GO:0098800	inner mitochondrial membrane protein complex	2.44766e-07	0
biological_process	GO:0034440	lipid oxidation	2.48755e-07	0
biological_process	GO:0048583	regulation of response to stimulus	2.57629e-07	0
biological_process	GO:0002474	antigen processing and presentation of peptide antigen via MHC class I	2.64525e-07	0
biological_process	GO:0009117	nucleotide metabolic process	2.64769e-07	0
biological_process	GO:0006414	translational elongation	2.79767e-07	0
molecular_function	GO:0043168	anion binding	2.86928e-07	0
biological_process	GO:0008610	lipid biosynthetic process	2.98383e-07	0
biological_process	GO:0007050	cell cycle arrest	3.01847e-07	0
cellular_component	GO:0042470	melanosome	3.13416e-07	0
cellular_component	GO:0048770	pigment granule	3.13416e-07	0
biological_process	GO:0044242	cellular lipid catabolic process	3.13765e-07	0
biological_process	GO:0019395	fatty acid oxidation	3.15884e-07	0
biological_process	GO:0031647	regulation of protein stability	3.19211e-07	0
biological_process	GO:0035967	cellular response to topologically incorrect protein	3.49132e-07	0
biological_process	GO:0070126	mitochondrial translational termination	3.5138e-07	0
biological_process	GO:0051091	positive regulation of DNA-binding transcription factor activity	3.57529e-07	0
biological_process	GO:0006397	mRNA processing	3.66521e-07	0
molecular_function	GO:0031625	ubiquitin protein ligase binding	3.7533e-07	0
biological_process	GO:1901652	response to peptide	4.18771e-07	0
cellular_component	GO:0005635	nuclear envelope	4.41418e-07	0
cellular_component	GO:0048471	perinuclear region of cytoplasm	4.42653e-07	0
biological_process	GO:0018205	peptidyl-lysine modification	4.5751e-07	0
biological_process	GO:0030968	endoplasmic reticulum unfolded protein response	4.57886e-07	0
biological_process	GO:0032481	positive regulation of type I interferon production	4.59203e-07	0
biological_process	GO:0006281	DNA repair	4.6652e-07	0
biological_process	GO:0034620	cellular response to unfolded protein	4.74453e-07	0
molecular_function	GO:0016667	oxidoreductase activity, acting on a sulfur group of donors	5.1712e-07	0
molecular_function	GO:0003690	double-stranded DNA binding	5.34507e-07	0
biological_process	GO:0016192	vesicle-mediated transport	5.35157e-07	0
biological_process	GO:0043068	positive regulation of programmed cell death	5.70123e-07	0
molecular_function	GO:0005524	ATP binding	5.71441e-07	0
biological_process	GO:0048545	response to steroid hormone	5.72481e-07	0
biological_process	GO:0019079	viral genome replication	6.51067e-07	0
biological_process	GO:0017144	drug metabolic process	7.24837e-07	0
biological_process	GO:0072401	signal transduction involved in DNA integrity checkpoint	7.31113e-07	0
biological_process	GO:0072422	signal transduction involved in DNA damage checkpoint	7.31113e-07	0
biological_process	GO:0042325	regulation of phosphorylation	7.31267e-07	0
cellular_component	GO:0044798	nuclear transcription factor complex	7.40908e-07	0
biological_process	GO:0019220	regulation of phosphate metabolic process	7.50427e-07	0
biological_process	GO:0031667	response to nutrient levels	7.72391e-07	0
biological_process	GO:0032270	positive regulation of cellular protein metabolic process	7.77481e-07	0
biological_process	GO:0060548	negative regulation of cell death	8.04491e-07	0
biological_process	GO:1903362	regulation of cellular protein catabolic process	8.05698e-07	0
molecular_function	GO:0045296	cadherin binding	8.16781e-07	0
biological_process	GO:0046364	monosaccharide biosynthetic process	8.22041e-07	0
biological_process	GO:0051174	regulation of phosphorus metabolic process	8.79554e-07	0
biological_process	GO:0046394	carboxylic acid biosynthetic process	8.89748e-07	0
biological_process	GO:2001234	negative regulation of apoptotic signaling pathway	9.08391e-07	0
biological_process	GO:0048524	positive regulation of viral process	9.31044e-07	0
biological_process	GO:0060562	epithelial tube morphogenesis	9.3412e-07	0
molecular_function	GO:0003677	DNA binding	9.41782e-07	0
biological_process	GO:0000077	DNA damage checkpoint	9.68757e-07	0
cellular_component	GO:0005681	spliceosomal complex	1.02967e-06	0
biological_process	GO:0045071	negative regulation of viral genome replication	1.03335e-06	0
biological_process	GO:1902532	negative regulation of intracellular signal transduction	1.05778e-06	0
molecular_function	GO:0003714	transcription corepressor activity	1.05867e-06	0
biological_process	GO:0016053	organic acid biosynthetic process	1.06905e-06	0
biological_process	GO:0071347	cellular response to interleukin-1	1.0932e-06	0
biological_process	GO:0010942	positive regulation of cell death	1.10373e-06	0
biological_process	GO:2001242	regulation of intrinsic apoptotic signaling pathway	1.12622e-06	0
biological_process	GO:0072395	signal transduction involved in cell cycle checkpoint	1.17118e-06	0
biological_process	GO:0009792	embryo development ending in birth or egg hatching	1.17232e-06	0
biological_process	GO:0018196	peptidyl-asparagine modification	1.18465e-06	0
molecular_function	GO:0016620	oxidoreductase activity, acting on the aldehyde or oxo group of donors, NAD or NADP as acceptor	1.19369e-06	0
molecular_function	GO:0016616	oxidoreductase activity, acting on the CH-OH group of donors, NAD or NADP as acceptor	1.22275e-06	0
biological_process	GO:0031570	DNA integrity checkpoint	1.26429e-06	0
molecular_function	GO:0000976	transcription regulatory region sequence-specific DNA binding	1.29107e-06	0
molecular_function	GO:0097367	carbohydrate derivative binding	1.30496e-06	0
biological_process	GO:0001889	liver development	1.32534e-06	0
biological_process	GO:0051092	positive regulation of NF-kappaB transcription factor activity	1.40565e-06	0
molecular_function	GO:0042803	protein homodimerization activity	1.51007e-06	0
biological_process	GO:0015931	nucleobase-containing compound transport	1.51518e-06	0
biological_process	GO:0043009	chordate embryonic development	1.55336e-06	0
biological_process	GO:0001933	negative regulation of protein phosphorylation	1.60774e-06	0
molecular_function	GO:0044212	transcription regulatory region DNA binding	1.61902e-06	0
molecular_function	GO:0008144	drug binding	1.67091e-06	0
biological_process	GO:0045595	regulation of cell differentiation	1.67734e-06	0
molecular_function	GO:0016829	lyase activity	1.67858e-06	0
biological_process	GO:1903901	negative regulation of viral life cycle	1.68589e-06	0
biological_process	GO:0009790	embryo development	1.68929e-06	0
biological_process	GO:0006457	protein folding	1.75659e-06	0
biological_process	GO:0051851	modulation by host of symbiont process	1.75749e-06	0
biological_process	GO:0032880	regulation of protein localization	1.76307e-06	0
biological_process	GO:0010467	gene expression	1.77516e-06	0
molecular_function	GO:0016614	oxidoreductase activity, acting on CH-OH group of donors	1.82224e-06	0
molecular_function	GO:0001067	regulatory region nucleic acid binding	1.82262e-06	0
molecular_function	GO:0140096	catalytic activity, acting on a protein	1.87374e-06	0
biological_process	GO:0022411	cellular component disassembly	1.91545e-06	0
biological_process	GO:0000956	nuclear-transcribed mRNA catabolic process	1.91714e-06	0
cellular_component	GO:0030176	integral component of endoplasmic reticulum membrane	1.92705e-06	0
biological_process	GO:0010035	response to inorganic substance	1.96455e-06	0
biological_process	GO:0090150	establishment of protein localization to membrane	1.97574e-06	0
biological_process	GO:0007167	enzyme linked receptor protein signaling pathway	1.99702e-06	0
biological_process	GO:0007249	I-kappaB kinase/NF-kappaB signaling	2.0395e-06	0
biological_process	GO:0006984	ER-nucleus signaling pathway	2.05634e-06	0
biological_process	GO:0060429	epithelium development	2.08938e-06	0
biological_process	GO:0060333	interferon-gamma-mediated signaling pathway	2.33635e-06	0
biological_process	GO:0042180	cellular ketone metabolic process	2.38147e-06	0
cellular_component	GO:0005840	ribosome	2.43833e-06	0
biological_process	GO:0045732	positive regulation of protein catabolic process	2.5425e-06	0
biological_process	GO:0006367	transcription initiation from RNA polymerase II promoter	2.57782e-06	0
biological_process	GO:0043687	post-translational protein modification	2.60728e-06	0
biological_process	GO:0042594	response to starvation	2.65806e-06	0
biological_process	GO:0033043	regulation of organelle organization	2.9143e-06	0
biological_process	GO:0018279	protein N-linked glycosylation via asparagine	2.95424e-06	0
biological_process	GO:0009108	coenzyme biosynthetic process	2.99299e-06	0
cellular_component	GO:0005667	transcription factor complex	3.00347e-06	0
cellular_component	GO:0031970	organelle envelope lumen	3.07083e-06	0
cellular_component	GO:0031227	intrinsic component of endoplasmic reticulum membrane	3.63687e-06	0
cellular_component	GO:0070161	anchoring junction	3.68316e-06	0
cellular_component	GO:0098852	lytic vacuole membrane	4.06217e-06	0
cellular_component	GO:0005765	lysosomal membrane	5.81049e-06	0
cellular_component	GO:0005782	peroxisomal matrix	5.86399e-06	0
cellular_component	GO:0031907	microbody lumen	5.86399e-06	0
cellular_component	GO:0005793	endoplasmic reticulum-Golgi intermediate compartment	6.78738e-06	0
molecular_function	GO:0000977	RNA polymerase II regulatory region sequence-specific DNA binding	2.29232e-06	0.01
molecular_function	GO:0001012	RNA polymerase II regulatory region DNA binding	2.29232e-06	0.01
molecular_function	GO:0016772	transferase activity, transferring phosphorus-containing groups	2.64535e-06	0.01
biological_process	GO:0060341	regulation of cellular localization	3.1763e-06	0.01
biological_process	GO:0043043	peptide biosynthetic process	3.26473e-06	0.01
biological_process	GO:0042326	negative regulation of phosphorylation	3.34467e-06	0.01
biological_process	GO:0051276	chromosome organization	3.49504e-06	0.01
molecular_function	GO:0016903	oxidoreductase activity, acting on the aldehyde or oxo group of donors	3.51898e-06	0.01
biological_process	GO:0006473	protein acetylation	3.74575e-06	0.01
biological_process	GO:0009896	positive regulation of catabolic process	3.74721e-06	0.01
molecular_function	GO:0004576	oligosaccharyl transferase activity	3.82184e-06	0.01
biological_process	GO:0070555	response to interleukin-1	3.82259e-06	0.01
biological_process	GO:0040008	regulation of growth	3.83576e-06	0.01
biological_process	GO:0031400	negative regulation of protein modification process	3.84466e-06	0.01
molecular_function	GO:0046914	transition metal ion binding	3.88659e-06	0.01
biological_process	GO:0009607	response to biotic stimulus	4.046e-06	0.01
biological_process	GO:0001701	in utero embryonic development	4.18611e-06	0.01
biological_process	GO:0051098	regulation of binding	4.18611e-06	0.01
biological_process	GO:1903311	regulation of mRNA metabolic process	4.22551e-06	0.01
biological_process	GO:0032386	regulation of intracellular transport	4.24447e-06	0.01
biological_process	GO:0071243	cellular response to arsenic-containing substance	4.37685e-06	0.01
biological_process	GO:0042254	ribosome biogenesis	4.4875e-06	0.01
biological_process	GO:0006352	DNA-templated transcription, initiation	4.5038e-06	0.01
biological_process	GO:0051248	negative regulation of protein metabolic process	4.58295e-06	0.01
biological_process	GO:0051169	nuclear transport	4.69796e-06	0.01
biological_process	GO:0043066	negative regulation of apoptotic process	4.74653e-06	0.01
biological_process	GO:0006913	nucleocytoplasmic transport	4.75199e-06	0.01
biological_process	GO:0002753	cytoplasmic pattern recognition receptor signaling pathway	4.7779e-06	0.01
biological_process	GO:0006611	protein export from nucleus	4.83487e-06	0.01
biological_process	GO:0043069	negative regulation of programmed cell death	4.88488e-06	0.01
molecular_function	GO:0044877	protein-containing complex binding	4.90281e-06	0.01
biological_process	GO:0017015	regulation of transforming growth factor beta receptor signaling pathway	5.01599e-06	0.01
biological_process	GO:0019693	ribose phosphate metabolic process	5.20476e-06	0.01
biological_process	GO:0000302	response to reactive oxygen species	5.34098e-06	0.01
biological_process	GO:0044843	cell cycle G1/S phase transition	5.41384e-06	0.01
biological_process	GO:0071396	cellular response to lipid	5.49733e-06	0.01
biological_process	GO:0051168	nuclear export	5.51474e-06	0.01
molecular_function	GO:0050839	cell adhesion molecule binding	7.84579e-06	0.01
molecular_function	GO:0019900	kinase binding	7.99423e-06	0.01
molecular_function	GO:0051082	unfolded protein binding	1.08196e-05	0.01
cellular_component	GO:0043232	intracellular non-membrane-bounded organelle	1.19795e-05	0.01
molecular_function	GO:0016301	kinase activity	1.24918e-05	0.01
molecular_function	GO:0004579	dolichyl-diphosphooligosaccharide-protein glycotransferase activity	1.33143e-05	0.01
cellular_component	GO:0043228	non-membrane-bounded organelle	1.52787e-05	0.01
cellular_component	GO:0005758	mitochondrial intermembrane space	1.60893e-05	0.01
molecular_function	GO:0035257	nuclear hormone receptor binding	1.85136e-05	0.01
cellular_component	GO:0015934	large ribosomal subunit	1.88926e-05	0.01
molecular_function	GO:0003713	transcription coactivator activity	2.01883e-05	0.01
molecular_function	GO:0019901	protein kinase binding	2.06815e-05	0.01
cellular_component	GO:0005615	extracellular space	2.23828e-05	0.01
cellular_component	GO:0061695	transferase complex, transferring phosphorus-containing groups	2.23851e-05	0.01
cellular_component	GO:0008250	oligosaccharyltransferase complex	2.31319e-05	0.01
cellular_component	GO:0031301	integral component of organelle membrane	2.32299e-05	0.01
cellular_component	GO:0015935	small ribosomal subunit	2.3634e-05	0.01
cellular_component	GO:0090575	RNA polymerase II transcription factor complex	2.69154e-05	0.01
biological_process	GO:0032984	protein-containing complex disassembly	6.0983e-06	0.02
biological_process	GO:0030330	DNA damage response, signal transduction by p53 class mediator	6.17224e-06	0.02
biological_process	GO:0009967	positive regulation of signal transduction	6.30809e-06	0.02
biological_process	GO:0051817	modulation of process of other organism involved in symbiotic interaction	6.36383e-06	0.02
biological_process	GO:0006475	internal protein amino acid acetylation	6.81694e-06	0.02
biological_process	GO:0050434	positive regulation of viral transcription	6.9398e-06	0.02
biological_process	GO:0043484	regulation of RNA splicing	7.09629e-06	0.02
biological_process	GO:0001655	urogenital system development	7.1173e-06	0.02
biological_process	GO:0043200	response to amino acid	7.40357e-06	0.02
biological_process	GO:0043085	positive regulation of catalytic activity	7.50104e-06	0.02
biological_process	GO:0006412	translation	7.69584e-06	0.02
biological_process	GO:0043434	response to peptide hormone	7.7316e-06	0.02
biological_process	GO:0071453	cellular response to oxygen levels	8.1615e-06	0.02
biological_process	GO:0000082	G1/S transition of mitotic cell cycle	8.17135e-06	0.02
biological_process	GO:0006260	DNA replication	8.23573e-06	0.02
cellular_component	GO:0005798	Golgi-associated vesicle	2.7845e-05	0.02
cellular_component	GO:0000151	ubiquitin ligase complex	2.81302e-05	0.02
molecular_function	GO:0000287	magnesium ion binding	2.8856e-05	0.02
cellular_component	GO:0000315	organellar large ribosomal subunit	3.17863e-05	0.02
cellular_component	GO:0005762	mitochondrial large ribosomal subunit	3.17863e-05	0.02
molecular_function	GO:0003857	3-hydroxyacyl-CoA dehydrogenase activity	4.63773e-05	0.02
molecular_function	GO:0000987	cis-regulatory region sequence-specific DNA binding	4.89032e-05	0.02
molecular_function	GO:0035326	cis-regulatory region binding	4.89032e-05	0.02
cellular_component	GO:0031300	intrinsic component of organelle membrane	5.23478e-05	0.02
molecular_function	GO:0000978	RNA polymerase II cis-regulatory region sequence-specific DNA binding	5.24509e-05	0.02
molecular_function	GO:0004029	aldehyde dehydrogenase (NAD+) activity	5.70325e-05	0.02
cellular_component	GO:0030662	coated vesicle membrane	6.63036e-05	0.02
biological_process	GO:0050657	nucleic acid transport	8.64613e-06	0.04
biological_process	GO:0050658	RNA transport	8.64613e-06	0.04
biological_process	GO:0032392	DNA geometric change	8.67665e-06	0.04
biological_process	GO:0070498	interleukin-1-mediated signaling pathway	9.00196e-06	0.04
biological_process	GO:0071407	cellular response to organic cyclic compound	9.05789e-06	0.04
biological_process	GO:0043433	negative regulation of DNA-binding transcription factor activity	9.07152e-06	0.04
biological_process	GO:0006090	pyruvate metabolic process	9.13326e-06	0.04
biological_process	GO:1903844	regulation of cellular response to transforming growth factor beta stimulus	9.32137e-06	0.04
biological_process	GO:0070482	response to oxygen levels	1.01303e-05	0.04
biological_process	GO:0001932	regulation of protein phosphorylation	1.07367e-05	0.04
biological_process	GO:0034614	cellular response to reactive oxygen species	1.12992e-05	0.04
biological_process	GO:0071158	positive regulation of cell cycle arrest	1.14773e-05	0.04
biological_process	GO:0072001	renal system development	1.15324e-05	0.04
biological_process	GO:0006289	nucleotide-excision repair	1.18835e-05	0.04
biological_process	GO:0044783	G1 DNA damage checkpoint	1.20413e-05	0.04
biological_process	GO:0009259	ribonucleotide metabolic process	1.22365e-05	0.04
biological_process	GO:0045862	positive regulation of proteolysis	1.24544e-05	0.04
biological_process	GO:0051702	interaction with symbiont	1.26336e-05	0.04
biological_process	GO:0008283	cell population proliferation	1.26746e-05	0.04
biological_process	GO:0034612	response to tumor necrosis factor	1.29748e-05	0.04
biological_process	GO:0016137	glycoside metabolic process	1.30398e-05	0.04
biological_process	GO:0019319	hexose biosynthetic process	1.31207e-05	0.04
biological_process	GO:0023056	positive regulation of signaling	1.33905e-05	0.04
biological_process	GO:0008202	steroid metabolic process	1.42571e-05	0.04
biological_process	GO:0018394	peptidyl-lysine acetylation	1.44515e-05	0.04
biological_process	GO:0048732	gland development	1.44813e-05	0.04
biological_process	GO:0016072	rRNA metabolic process	1.4943e-05	0.04
biological_process	GO:1903320	regulation of protein modification by small protein conjugation or removal	1.504e-05	0.04
biological_process	GO:0045321	leukocyte activation	1.52811e-05	0.04
biological_process	GO:0002479	antigen processing and presentation of exogenous peptide antigen via MHC class I, TAP-dependent	1.60911e-05	0.04
biological_process	GO:0051707	response to other organism	1.62839e-05	0.04
biological_process	GO:0032508	DNA duplex unwinding	1.62941e-05	0.04
biological_process	GO:0032269	negative regulation of cellular protein metabolic process	1.65381e-05	0.04
biological_process	GO:0008637	apoptotic mitochondrial changes	1.68582e-05	0.04
biological_process	GO:1902652	secondary alcohol metabolic process	1.70287e-05	0.04
biological_process	GO:0006163	purine nucleotide metabolic process	1.70857e-05	0.04
biological_process	GO:0001763	morphogenesis of a branching structure	1.70938e-05	0.04
biological_process	GO:0051236	establishment of RNA localization	1.70938e-05	0.04
biological_process	GO:0043574	peroxisomal transport	1.74638e-05	0.04
biological_process	GO:0000375	RNA splicing, via transesterification reactions	1.76395e-05	0.04
biological_process	GO:0000377	RNA splicing, via transesterification reactions with bulged adenosine as nucleophile	1.79756e-05	0.04
biological_process	GO:0000398	mRNA splicing, via spliceosome	1.79756e-05	0.04
biological_process	GO:0006364	rRNA processing	1.80444e-05	0.04
biological_process	GO:0006259	DNA metabolic process	1.85137e-05	0.04
biological_process	GO:0048513	animal organ development	1.86011e-05	0.04
biological_process	GO:0071236	cellular response to antibiotic	1.86443e-05	0.04
biological_process	GO:0043207	response to external biotic stimulus	1.89648e-05	0.04
biological_process	GO:0006778	porphyrin-containing compound metabolic process	1.92309e-05	0.04
molecular_function	GO:0003700	DNA-binding transcription factor activity	8.88619e-05	0.04
molecular_function	GO:0008270	zinc ion binding	9.24478e-05	0.04
molecular_function	GO:0016628	oxidoreductase activity, acting on the CH-CH group of donors, NAD or NADP as acceptor	0.000113137	0.05
molecular_function	GO:0016773	phosphotransferase activity, alcohol group as acceptor	0.000117848	0.05
molecular_function	GO:0019904	protein domain specific binding	0.000122446	0.05
biological_process	GO:0010948	negative regulation of cell cycle process	2.00611e-05	0.06
biological_process	GO:0009653	anatomical structure morphogenesis	2.01085e-05	0.06
biological_process	GO:0022613	ribonucleoprotein complex biogenesis	2.02041e-05	0.06
biological_process	GO:0016049	cell growth	2.05015e-05	0.06
biological_process	GO:0031503	protein-containing complex localization	2.06765e-05	0.06
biological_process	GO:0010647	positive regulation of cell communication	2.10075e-05	0.06
biological_process	GO:0007568	aging	2.10561e-05	0.06
biological_process	GO:0065007	biological regulation	2.12986e-05	0.06
biological_process	GO:0009150	purine ribonucleotide metabolic process	2.15748e-05	0.06
biological_process	GO:0031960	response to corticosteroid	2.1782e-05	0.06
biological_process	GO:0006625	protein targeting to peroxisome	2.22432e-05	0.06
biological_process	GO:0072662	protein localization to peroxisome	2.22432e-05	0.06
biological_process	GO:0072663	establishment of protein localization to peroxisome	2.22432e-05	0.06
biological_process	GO:0045597	positive regulation of cell differentiation	2.29076e-05	0.06
biological_process	GO:0031331	positive regulation of cellular catabolic process	2.34393e-05	0.06
cellular_component	GO:0005769	early endosome	9.64957e-05	0.06
molecular_function	GO:0015036	disulfide oxidoreductase activity	0.000133164	0.06
biological_process	GO:0031571	mitotic G1 DNA damage checkpoint	2.36999e-05	0.07
biological_process	GO:0044819	mitotic G1/S transition checkpoint	2.36999e-05	0.07
biological_process	GO:0000188	inactivation of MAPK activity	2.41015e-05	0.07
biological_process	GO:0002520	immune system development	2.43086e-05	0.07
biological_process	GO:0044092	negative regulation of molecular function	2.43192e-05	0.07
biological_process	GO:0044272	sulfur compound biosynthetic process	2.59613e-05	0.07
biological_process	GO:0032870	cellular response to hormone stimulus	2.6306e-05	0.07
biological_process	GO:1901605	alpha-amino acid metabolic process	2.68422e-05	0.07
biological_process	GO:0042590	antigen processing and presentation of exogenous peptide antigen via MHC class I	2.70954e-05	0.07
biological_process	GO:0043122	regulation of I-kappaB kinase/NF-kappaB signaling	2.72936e-05	0.07
biological_process	GO:0009314	response to radiation	2.73138e-05	0.07
biological_process	GO:0000075	cell cycle checkpoint	2.73142e-05	0.07
biological_process	GO:0001817	regulation of cytokine production	2.74605e-05	0.07
biological_process	GO:0009069	serine family amino acid metabolic process	2.79273e-05	0.08
biological_process	GO:0072073	kidney epithelium development	2.81051e-05	0.08
biological_process	GO:0048511	rhythmic process	2.81124e-05	0.08
biological_process	GO:2001243	negative regulation of intrinsic apoptotic signaling pathway	2.82106e-05	0.08
molecular_function	GO:0043565	sequence-specific DNA binding	0.000147078	0.08
cellular_component	GO:0030133	transport vesicle	0.000150163	0.08
cellular_component	GO:0022626	cytosolic ribosome	0.00018007	0.08
cellular_component	GO:1905368	peptidase complex	0.000180359	0.08
cellular_component	GO:0015630	microtubule cytoskeleton	0.000195927	0.08
cellular_component	GO:0043202	lysosomal lumen	0.00019681	0.08
biological_process	GO:0045936	negative regulation of phosphate metabolic process	2.91259e-05	0.1
biological_process	GO:1990748	cellular detoxification	2.99441e-05	0.1
biological_process	GO:0051338	regulation of transferase activity	2.99786e-05	0.1
biological_process	GO:0051384	response to glucocorticoid	3.0127e-05	0.1
biological_process	GO:2000514	regulation of CD4-positive, alpha-beta T cell activation	3.0166e-05	0.1
biological_process	GO:0050821	protein stabilization	3.04497e-05	0.1
biological_process	GO:0006094	gluconeogenesis	3.06015e-05	0.1
biological_process	GO:0010564	regulation of cell cycle process	3.08484e-05	0.1
biological_process	GO:0006749	glutathione metabolic process	3.13535e-05	0.1
biological_process	GO:0000731	DNA synthesis involved in DNA repair	3.15941e-05	0.1
biological_process	GO:0034622	cellular protein-containing complex assembly	3.2186e-05	0.11
biological_process	GO:0033157	regulation of intracellular protein transport	3.24259e-05	0.11
biological_process	GO:0010563	negative regulation of phosphorus metabolic process	3.27747e-05	0.11
biological_process	GO:2001236	regulation of extrinsic apoptotic signaling pathway	3.2848e-05	0.11
biological_process	GO:0051701	interaction with host	3.29358e-05	0.11
biological_process	GO:0032496	response to lipopolysaccharide	3.32748e-05	0.11
biological_process	GO:0032388	positive regulation of intracellular transport	3.33806e-05	0.11
biological_process	GO:1903706	regulation of hemopoiesis	3.36273e-05	0.11
biological_process	GO:1903322	positive regulation of protein modification by small protein conjugation or removal	3.38604e-05	0.11
biological_process	GO:1903829	positive regulation of cellular protein localization	3.43946e-05	0.12
biological_process	GO:0018393	internal peptidyl-lysine acetylation	3.44399e-05	0.12
biological_process	GO:0046718	viral entry into host cell	3.55407e-05	0.12
biological_process	GO:0001822	kidney development	3.58688e-05	0.12
biological_process	GO:0002237	response to molecule of bacterial origin	3.63169e-05	0.12
cellular_component	GO:0043596	nuclear replication fork	0.000246408	0.13
biological_process	GO:0070972	protein localization to endoplasmic reticulum	3.87389e-05	0.14
biological_process	GO:0071363	cellular response to growth factor stimulus	3.91967e-05	0.14
biological_process	GO:0043543	protein acylation	3.92896e-05	0.14
biological_process	GO:0008203	cholesterol metabolic process	3.9825e-05	0.14
biological_process	GO:0002221	pattern recognition receptor signaling pathway	4.01855e-05	0.14
biological_process	GO:0070848	response to growth factor	4.12847e-05	0.15
cellular_component	GO:0043601	nuclear replisome	0.00026473	0.15
biological_process	GO:0016573	histone acetylation	4.18267e-05	0.16
molecular_function	GO:0004030	aldehyde dehydrogenase [NAD(P)+] activity	0.000168105	0.16
molecular_function	GO:0043021	ribonucleoprotein complex binding	0.000173255	0.16
molecular_function	GO:0004722	protein serine/threonine phosphatase activity	0.000182478	0.16
cellular_component	GO:0000228	nuclear chromosome	0.000285731	0.16
biological_process	GO:0006353	DNA-templated transcription, termination	4.39907e-05	0.18
biological_process	GO:0001959	regulation of cytokine-mediated signaling pathway	4.70072e-05	0.18
biological_process	GO:0043488	regulation of mRNA stability	4.70072e-05	0.18
biological_process	GO:0010565	regulation of cellular ketone metabolic process	4.75195e-05	0.18
biological_process	GO:1901796	regulation of signal transduction by p53 class mediator	4.75195e-05	0.18
biological_process	GO:0071156	regulation of cell cycle arrest	4.77229e-05	0.18
biological_process	GO:0036293	response to decreased oxygen levels	4.88003e-05	0.18
biological_process	GO:0072431	signal transduction involved in mitotic G1 DNA damage checkpoint	4.89005e-05	0.18
biological_process	GO:1902400	intracellular signal transduction involved in G1 DNA damage checkpoint	4.89005e-05	0.18
biological_process	GO:0051403	stress-activated MAPK cascade	4.92977e-05	0.18
biological_process	GO:0031396	regulation of protein ubiquitination	4.97666e-05	0.18
biological_process	GO:0006643	membrane lipid metabolic process	4.98375e-05	0.18
biological_process	GO:0007346	regulation of mitotic cell cycle	5.01172e-05	0.18
biological_process	GO:0043549	regulation of kinase activity	5.02273e-05	0.18
cellular_component	GO:0036464	cytoplasmic ribonucleoprotein granule	0.000329777	0.18
biological_process	GO:0043370	regulation of CD4-positive, alpha-beta T cell differentiation	5.05935e-05	0.19
biological_process	GO:0071496	cellular response to external stimulus	5.13081e-05	0.19
biological_process	GO:0070423	nucleotide-binding oligomerization domain containing signaling pathway	5.32577e-05	0.2
biological_process	GO:0044409	entry into host	5.49505e-05	0.2
biological_process	GO:1901699	cellular response to nitrogen compound	5.51696e-05	0.2
biological_process	GO:0031398	positive regulation of protein ubiquitination	5.62155e-05	0.2
biological_process	GO:0045859	regulation of protein kinase activity	5.75223e-05	0.2
biological_process	GO:0035710	CD4-positive, alpha-beta T cell activation	5.75728e-05	0.2
biological_process	GO:0030258	lipid modification	5.84402e-05	0.2
biological_process	GO:1903364	positive regulation of cellular protein catabolic process	5.84853e-05	0.2
biological_process	GO:0009892	negative regulation of metabolic process	5.86564e-05	0.2
molecular_function	GO:0000979	RNA polymerase II core promoter sequence-specific DNA binding	0.000238521	0.2
biological_process	GO:0045444	fat cell differentiation	6.01217e-05	0.22
biological_process	GO:0060759	regulation of response to cytokine stimulus	6.01604e-05	0.22
biological_process	GO:0042127	regulation of cell population proliferation	6.06562e-05	0.22
biological_process	GO:1903050	regulation of proteolysis involved in cellular protein catabolic process	6.06964e-05	0.22
biological_process	GO:0061013	regulation of mRNA catabolic process	6.07555e-05	0.22
biological_process	GO:0016051	carbohydrate biosynthetic process	6.08652e-05	0.22
biological_process	GO:0071900	regulation of protein serine/threonine kinase activity	6.10597e-05	0.22
biological_process	GO:0032101	regulation of response to external stimulus	6.18935e-05	0.22
biological_process	GO:0001558	regulation of cell growth	6.25292e-05	0.22
biological_process	GO:0033866	nucleoside bisphosphate biosynthetic process	6.26636e-05	0.22
biological_process	GO:0034030	ribonucleoside bisphosphate biosynthetic process	6.26636e-05	0.22
biological_process	GO:0034033	purine nucleoside bisphosphate biosynthetic process	6.26636e-05	0.22
biological_process	GO:0006325	chromatin organization	6.57779e-05	0.23
biological_process	GO:0051240	positive regulation of multicellular organismal process	6.58593e-05	0.23
biological_process	GO:0071356	cellular response to tumor necrosis factor	6.77073e-05	0.23
biological_process	GO:0071383	cellular response to steroid hormone stimulus	6.83156e-05	0.23
cellular_component	GO:0031968	organelle outer membrane	0.000427051	0.23
molecular_function	GO:0070412	R-SMAD binding	0.000302153	0.24
cellular_component	GO:0005777	peroxisome	0.000483346	0.24
cellular_component	GO:0042579	microbody	0.000483346	0.24
cellular_component	GO:1902562	H4 histone acetyltransferase complex	0.000592598	0.25
cellular_component	GO:0030135	coated vesicle	0.000595901	0.25
cellular_component	GO:0005741	mitochondrial outer membrane	0.000599377	0.25
cellular_component	GO:0019867	outer membrane	0.000599805	0.25
biological_process	GO:0010821	regulation of mitochondrion organization	7.25721e-05	0.26
biological_process	GO:0045185	maintenance of protein location	7.30347e-05	0.26
biological_process	GO:0061138	morphogenesis of a branching epithelium	7.30449e-05	0.26
biological_process	GO:1903708	positive regulation of hemopoiesis	7.34397e-05	0.26
biological_process	GO:0045047	protein targeting to ER	7.39482e-05	0.26
biological_process	GO:0009411	response to UV	7.48427e-05	0.26
molecular_function	GO:0016670	oxidoreductase activity, acting on a sulfur group of donors, oxygen as acceptor	0.000310881	0.26
biological_process	GO:0046822	regulation of nucleocytoplasmic transport	7.60208e-05	0.27
biological_process	GO:0048856	anatomical structure development	7.67725e-05	0.27
biological_process	GO:0009410	response to xenobiotic stimulus	7.96514e-05	0.27
biological_process	GO:0006513	protein monoubiquitination	7.99516e-05	0.27
biological_process	GO:0042168	heme metabolic process	8.05431e-05	0.28
molecular_function	GO:0051427	hormone receptor binding	0.000358822	0.28
molecular_function	GO:0003678	DNA helicase activity	0.000388872	0.28
molecular_function	GO:0003995	acyl-CoA dehydrogenase activity	0.000403286	0.28
biological_process	GO:0035295	tube development	8.44659e-05	0.29
biological_process	GO:0048534	hematopoietic or lymphoid organ development	8.45553e-05	0.29
biological_process	GO:0072330	monocarboxylic acid biosynthetic process	8.48453e-05	0.29
biological_process	GO:1901532	regulation of hematopoietic progenitor cell differentiation	8.52813e-05	0.29
biological_process	GO:0051130	positive regulation of cellular component organization	8.58764e-05	0.29
biological_process	GO:0002443	leukocyte mediated immunity	8.69982e-05	0.29
biological_process	GO:0050793	regulation of developmental process	8.85564e-05	0.29
cellular_component	GO:0031965	nuclear membrane	0.000641442	0.29
cellular_component	GO:0030054	cell junction	0.0006509	0.29
cellular_component	GO:0005694	chromosome	0.000650954	0.29
cellular_component	GO:0000314	organellar small ribosomal subunit	0.000690306	0.3
cellular_component	GO:0005763	mitochondrial small ribosomal subunit	0.000690306	0.3
biological_process	GO:0006563	L-serine metabolic process	8.92372e-05	0.31
biological_process	GO:0061136	regulation of proteasomal protein catabolic process	9.00631e-05	0.31
biological_process	GO:0016052	carbohydrate catabolic process	9.07519e-05	0.31
biological_process	GO:1900180	regulation of protein localization to nucleus	9.28204e-05	0.31
molecular_function	GO:0001046	core promoter sequence-specific DNA binding	0.000451476	0.31
molecular_function	GO:0001047	core promoter binding	0.000451476	0.31
biological_process	GO:0035872	nucleotide-binding domain, leucine rich repeat containing receptor signaling pathway	9.48426e-05	0.32
biological_process	GO:0030097	hemopoiesis	9.52155e-05	0.32
biological_process	GO:0006977	DNA damage response, signal transduction by p53 class mediator resulting in cell cycle arrest	9.54973e-05	0.32
biological_process	GO:0072521	purine-containing compound metabolic process	9.57622e-05	0.32
biological_process	GO:0031098	stress-activated protein kinase signaling cascade	9.63397e-05	0.32
biological_process	GO:0061024	membrane organization	9.7994e-05	0.33
biological_process	GO:0072599	establishment of protein localization to endoplasmic reticulum	0.000100301	0.33
biological_process	GO:0019216	regulation of lipid metabolic process	0.000100463	0.33
cellular_component	GO:0008540	proteasome regulatory particle, base subcomplex	0.000697477	0.34
cellular_component	GO:0005838	proteasome regulatory particle	0.000784738	0.34
biological_process	GO:0036498	IRE1-mediated unfolded protein response	0.000102045	0.35
biological_process	GO:0000096	sulfur amino acid metabolic process	0.000102205	0.35
biological_process	GO:0035970	peptidyl-threonine dephosphorylation	0.000102365	0.35
biological_process	GO:0009301	snRNA transcription	0.000102683	0.35
cellular_component	GO:0000502	proteasome complex	0.000832112	0.35
cellular_component	GO:0030894	replisome	0.000885216	0.36
cellular_component	GO:0034399	nuclear periphery	0.000918641	0.36
biological_process	GO:0036294	cellular response to decreased oxygen levels	0.000107579	0.38
biological_process	GO:0043624	cellular protein complex disassembly	0.000107579	0.38
cellular_component	GO:0030120	vesicle coat	0.00100456	0.38
molecular_function	GO:0000981	DNA-binding transcription factor activity, RNA polymerase II-specific	0.000576001	0.39
molecular_function	GO:0016922	nuclear receptor binding	0.000592585	0.39
biological_process	GO:0001836	release of cytochrome c from mitochondria	0.000112555	0.41
biological_process	GO:0072413	signal transduction involved in mitotic cell cycle checkpoint	0.000112555	0.41
biological_process	GO:1902402	signal transduction involved in mitotic DNA damage checkpoint	0.000112555	0.41
biological_process	GO:1902403	signal transduction involved in mitotic DNA integrity checkpoint	0.000112555	0.41
molecular_function	GO:0046332	SMAD binding	0.000648506	0.41
molecular_function	GO:0016835	carbon-oxygen lyase activity	0.00073245	0.41
cellular_component	GO:1905369	endopeptidase complex	0.00113518	0.41
cellular_component	GO:0005776	autophagosome	0.00115151	0.41
cellular_component	GO:0030134	COPII-coated ER to Golgi transport vesicle	0.00115151	0.41
cellular_component	GO:0035770	ribonucleoprotein granule	0.00115752	0.41
cellular_component	GO:0044665	MLL1/2 complex	0.00115786	0.41
cellular_component	GO:0071339	MLL1 complex	0.00115786	0.41
cellular_component	GO:0030117	membrane coat	0.00116322	0.42
cellular_component	GO:0048475	coated membrane	0.00116322	0.42
molecular_function	GO:0035258	steroid hormone receptor binding	0.000867442	0.43
biological_process	GO:1901293	nucleoside phosphate biosynthetic process	0.000117365	0.44
molecular_function	GO:0003735	structural constituent of ribosome	0.000919776	0.44
molecular_function	GO:0016853	isomerase activity	0.000954651	0.44
biological_process	GO:0033865	nucleoside bisphosphate metabolic process	0.000118364	0.45
biological_process	GO:0033875	ribonucleoside bisphosphate metabolic process	0.000118364	0.45
biological_process	GO:0034032	purine nucleoside bisphosphate metabolic process	0.000118364	0.45
biological_process	GO:0010638	positive regulation of organelle organization	0.000123784	0.45
biological_process	GO:0072332	intrinsic apoptotic signaling pathway by p53 class mediator	0.000126001	0.45
biological_process	GO:0042592	homeostatic process	0.000126977	0.45
biological_process	GO:0051094	positive regulation of developmental process	0.000135239	0.45
biological_process	GO:0032502	developmental process	0.000136879	0.45
biological_process	GO:0006914	autophagy	0.000137498	0.45
biological_process	GO:0061919	process utilizing autophagic mechanism	0.000137498	0.45
biological_process	GO:0007031	peroxisome organization	0.000137636	0.45
biological_process	GO:0030512	negative regulation of transforming growth factor beta receptor signaling pathway	0.000137636	0.45
biological_process	GO:0034470	ncRNA processing	0.000142961	0.45
biological_process	GO:0002831	regulation of response to biotic stimulus	0.000144297	0.45
biological_process	GO:0023014	signal transduction by protein phosphorylation	0.000147343	0.45
biological_process	GO:0071353	cellular response to interleukin-4	0.000147353	0.46
cellular_component	GO:0005770	late endosome	0.00131159	0.46
cellular_component	GO:0045171	intercellular bridge	0.00138314	0.46
biological_process	GO:1905897	regulation of response to endoplasmic reticulum stress	0.000149144	0.47
biological_process	GO:0031668	cellular response to extracellular stimulus	0.000149704	0.47
biological_process	GO:0001666	response to hypoxia	0.000150926	0.47
molecular_function	GO:0001758	retinal dehydrogenase activity	0.000967531	0.47
molecular_function	GO:0034046	poly(G) binding	0.000967531	0.47
molecular_function	GO:0051920	peroxiredoxin activity	0.000967531	0.47
biological_process	GO:0010212	response to ionizing radiation	0.000154423	0.48
biological_process	GO:0007584	response to nutrient	0.000155286	0.48
molecular_function	GO:0001228	DNA-binding transcription activator activity, RNA polymerase II-specific	0.00104674	0.48
biological_process	GO:0007275	multicellular organism development	0.000158651	0.49
biological_process	GO:1901653	cellular response to peptide	0.00016331	0.5
biological_process	GO:0031401	positive regulation of protein modification process	0.000163762	0.5
biological_process	GO:0045023	G0 to G1 transition	0.000164245	0.5
biological_process	GO:0016241	regulation of macroautophagy	0.000164736	0.5
biological_process	GO:0043487	regulation of RNA stability	0.000165443	0.5
biological_process	GO:0001816	cytokine production	0.000165482	0.5
biological_process	GO:0009887	animal organ morphogenesis	0.000165662	0.5
biological_process	GO:0034660	ncRNA metabolic process	0.000166422	0.5
biological_process	GO:0008630	intrinsic apoptotic signaling pathway in response to DNA damage	0.000168642	0.5
biological_process	GO:0098781	ncRNA transcription	0.000176116	0.51
biological_process	GO:0045930	negative regulation of mitotic cell cycle	0.000177158	0.51
biological_process	GO:0000165	MAPK cascade	0.000179799	0.51
biological_process	GO:0002828	regulation of type 2 immune response	0.000182877	0.51
biological_process	GO:0032607	interferon-alpha production	0.000182877	0.51
biological_process	GO:0044788	modulation by host of viral process	0.000182877	0.51
biological_process	GO:0006664	glycolipid metabolic process	0.000183228	0.51
biological_process	GO:0042795	snRNA transcription by RNA polymerase II	0.000185517	0.51
biological_process	GO:0043393	regulation of protein binding	0.000187646	0.52
biological_process	GO:2001020	regulation of response to DNA damage stimulus	0.000189437	0.52
biological_process	GO:0034394	protein localization to cell surface	0.000189592	0.52
biological_process	GO:0010605	negative regulation of macromolecule metabolic process	0.000193395	0.53
biological_process	GO:0050789	regulation of biological process	0.000194062	0.53
biological_process	GO:0007179	transforming growth factor beta receptor signaling pathway	0.000196984	0.53
biological_process	GO:0034341	response to interferon-gamma	0.000196984	0.53
biological_process	GO:0002376	immune system process	0.000200826	0.53
biological_process	GO:0007035	vacuolar acidification	0.000200843	0.54
biological_process	GO:0009081	branched-chain amino acid metabolic process	0.000200843	0.54
biological_process	GO:0009083	branched-chain amino acid catabolic process	0.000200843	0.54
biological_process	GO:0035455	response to interferon-alpha	0.000200843	0.54
biological_process	GO:0043153	entrainment of circadian clock by photoperiod	0.000200843	0.54
biological_process	GO:0016125	sterol metabolic process	0.000201322	0.54
biological_process	GO:0046165	alcohol biosynthetic process	0.00020227	0.55
biological_process	GO:0043648	dicarboxylic acid metabolic process	0.000202536	0.55
biological_process	GO:0043367	CD4-positive, alpha-beta T cell differentiation	0.000203991	0.55
biological_process	GO:0070316	regulation of G0 to G1 transition	0.000209436	0.55
biological_process	GO:1901988	negative regulation of cell cycle phase transition	0.000209772	0.55
molecular_function	GO:0016787	hydrolase activity	0.0011285	0.55
molecular_function	GO:0046983	protein dimerization activity	0.00113057	0.55
cellular_component	GO:0042765	GPI-anchor transamidase complex	0.00139616	0.55
cellular_component	GO:0000123	histone acetyltransferase complex	0.00141649	0.55
biological_process	GO:0030638	polyketide metabolic process	0.000217265	0.56
biological_process	GO:0044597	daunorubicin metabolic process	0.000217265	0.56
biological_process	GO:0044598	doxorubicin metabolic process	0.000217265	0.56
biological_process	GO:0071166	ribonucleoprotein complex localization	0.00021776	0.56
biological_process	GO:0006637	acyl-CoA metabolic process	0.000221115	0.56
biological_process	GO:0035383	thioester metabolic process	0.000221115	0.56
biological_process	GO:0006888	endoplasmic reticulum to Golgi vesicle-mediated transport	0.000228889	0.56
biological_process	GO:0098754	detoxification	0.000229732	0.56
cellular_component	GO:0031461	cullin-RING ubiquitin ligase complex	0.00143546	0.56
cellular_component	GO:0005662	DNA replication factor A complex	0.00145493	0.56
cellular_component	GO:0030137	COPI-coated vesicle	0.00149963	0.56
cellular_component	GO:0033116	endoplasmic reticulum-Golgi intermediate compartment membrane	0.00164524	0.56
biological_process	GO:0038066	p38MAPK cascade	0.000234821	0.57
biological_process	GO:0001775	cell activation	0.000236834	0.57
biological_process	GO:1903509	liposaccharide metabolic process	0.000237781	0.57
biological_process	GO:0009267	cellular response to starvation	0.000240545	0.57
biological_process	GO:0051028	mRNA transport	0.000242396	0.57
biological_process	GO:0006575	cellular modified amino acid metabolic process	0.000243373	0.57
biological_process	GO:1901568	fatty acid derivative metabolic process	0.000247131	0.57
biological_process	GO:0001659	temperature homeostasis	0.000247149	0.57
biological_process	GO:0032259	methylation	0.000252801	0.57
biological_process	GO:0044773	mitotic DNA damage checkpoint	0.00025501	0.57
biological_process	GO:1903845	negative regulation of cellular response to transforming growth factor beta stimulus	0.000257561	0.57
cellular_component	GO:0001931	uropod	0.00172495	0.58
cellular_component	GO:0031254	cell trailing edge	0.00172495	0.58
cellular_component	GO:0055029	nuclear DNA-directed RNA polymerase complex	0.00183746	0.58
cellular_component	GO:0030663	COPI-coated vesicle membrane	0.00184416	0.58
cellular_component	GO:0035267	NuA4 histone acetyltransferase complex	0.00184416	0.58
cellular_component	GO:0043189	H4/H2A histone acetyltransferase complex	0.00184416	0.58
cellular_component	GO:0031248	protein acetyltransferase complex	0.00184902	0.58
cellular_component	GO:1902493	acetyltransferase complex	0.00184902	0.58
biological_process	GO:0000963	mitochondrial RNA processing	0.000260805	0.59
biological_process	GO:0009070	serine family amino acid biosynthetic process	0.000260805	0.59
biological_process	GO:0043923	positive regulation by host of viral transcription	0.000260805	0.59
biological_process	GO:0031347	regulation of defense response	0.000268081	0.6
molecular_function	GO:0001216	DNA-binding transcription activator activity	0.00116792	0.6
biological_process	GO:0018209	peptidyl-serine modification	0.000268968	0.61
biological_process	GO:0009165	nucleotide biosynthetic process	0.000270647	0.61
biological_process	GO:0007169	transmembrane receptor protein tyrosine kinase signaling pathway	0.00027067	0.61
biological_process	GO:0006360	transcription by RNA polymerase I	0.000271833	0.61
molecular_function	GO:0004672	protein kinase activity	0.00120349	0.62
biological_process	GO:0000185	activation of MAPKKK activity	0.000273285	0.64
biological_process	GO:0071417	cellular response to organonitrogen compound	0.000276179	0.64
biological_process	GO:0002483	antigen processing and presentation of endogenous peptide antigen	0.00028311	0.65
biological_process	GO:0019885	antigen processing and presentation of endogenous peptide antigen via MHC class I	0.00028311	0.65
biological_process	GO:1902969	mitotic DNA replication	0.00028311	0.65
biological_process	GO:1902533	positive regulation of intracellular signal transduction	0.000284232	0.65
biological_process	GO:0006405	RNA export from nucleus	0.000284349	0.65
biological_process	GO:0031099	regeneration	0.000287227	0.65
cellular_component	GO:0034663	endoplasmic reticulum chaperone complex	0.00197373	0.65
biological_process	GO:0051336	regulation of hydrolase activity	0.000291455	0.66
biological_process	GO:0046390	ribose phosphate biosynthetic process	0.00029183	0.66
biological_process	GO:1901617	organic hydroxy compound biosynthetic process	0.000292213	0.66
biological_process	GO:0000209	protein polyubiquitination	0.000294346	0.66
biological_process	GO:0006613	cotranslational protein targeting to membrane	0.000297514	0.66
biological_process	GO:0071346	cellular response to interferon-gamma	0.000298839	0.66
biological_process	GO:0046365	monosaccharide catabolic process	0.000301374	0.66
biological_process	GO:0098727	maintenance of cell number	0.000301707	0.66
biological_process	GO:0051604	protein maturation	0.000302193	0.66
biological_process	GO:0048589	developmental growth	0.000308498	0.67
biological_process	GO:0045824	negative regulation of innate immune response	0.000309439	0.68
biological_process	GO:0045785	positive regulation of cell adhesion	0.000317072	0.68
biological_process	GO:0001505	regulation of neurotransmitter levels	0.000318485	0.68
biological_process	GO:0061326	renal tubule development	0.000321003	0.68
biological_process	GO:0030155	regulation of cell adhesion	0.000321258	0.68
biological_process	GO:0006506	GPI anchor biosynthetic process	0.00032457	0.68
molecular_function	GO:1990841	promoter-specific chromatin binding	0.00149909	0.68
molecular_function	GO:0016836	hydro-lyase activity	0.00156832	0.69
molecular_function	GO:0043621	protein self-association	0.00156832	0.69
biological_process	GO:0019985	translesion synthesis	0.000340811	0.7
biological_process	GO:0070317	negative regulation of G0 to G1 transition	0.000340811	0.7
biological_process	GO:0071426	ribonucleoprotein complex export from nucleus	0.000341918	0.7
biological_process	GO:2000116	regulation of cysteine-type endopeptidase activity	0.000342474	0.7
biological_process	GO:0032922	circadian regulation of gene expression	0.000347039	0.7
biological_process	GO:0006694	steroid biosynthetic process	0.000347527	0.7
biological_process	GO:0032663	regulation of interleukin-2 production	0.00034776	0.7
biological_process	GO:0035384	thioester biosynthetic process	0.00034776	0.7
biological_process	GO:0071616	acyl-CoA biosynthetic process	0.00034776	0.7
biological_process	GO:0071216	cellular response to biotic stimulus	0.000348085	0.7
biological_process	GO:0006413	translational initiation	0.000350701	0.7
biological_process	GO:0006283	transcription-coupled nucleotide-excision repair	0.000359032	0.7
biological_process	GO:0072006	nephron development	0.000362174	0.7
biological_process	GO:0006261	DNA-dependent DNA replication	0.000368001	0.7
biological_process	GO:0002244	hematopoietic progenitor cell differentiation	0.000369006	0.7
biological_process	GO:0019827	stem cell population maintenance	0.000369601	0.7
biological_process	GO:0046486	glycerolipid metabolic process	0.000373045	0.7
biological_process	GO:0070201	regulation of establishment of protein localization	0.000378356	0.7
biological_process	GO:0043281	regulation of cysteine-type endopeptidase activity involved in apoptotic process	0.000386328	0.7
biological_process	GO:0035821	modulation of process of other organism	0.000392615	0.7
biological_process	GO:0010506	regulation of autophagy	0.000397148	0.7
biological_process	GO:2000736	regulation of stem cell differentiation	0.000401624	0.7
biological_process	GO:0032727	positive regulation of interferon-alpha production	0.000412848	0.7
biological_process	GO:0010952	positive regulation of peptidase activity	0.000415724	0.7
molecular_function	GO:0004602	glutathione peroxidase activity	0.00157292	0.7
molecular_function	GO:0070530	K63-linked polyubiquitin modification-dependent protein binding	0.00157292	0.7
biological_process	GO:0016055	Wnt signaling pathway	0.000417365	0.71
biological_process	GO:0002292	T cell differentiation involved in immune response	0.000420851	0.71
biological_process	GO:0006805	xenobiotic metabolic process	0.00042381	0.71
biological_process	GO:0009063	cellular amino acid catabolic process	0.00042381	0.71
molecular_function	GO:0001221	transcription cofactor binding	0.0015919	0.71
molecular_function	GO:0003725	double-stranded RNA binding	0.00161842	0.71
molecular_function	GO:0043531	ADP binding	0.00164663	0.71
molecular_function	GO:0060090	molecular adaptor activity	0.00165563	0.72
cellular_component	GO:0042612	MHC class I protein complex	0.00212318	0.72
cellular_component	GO:0012506	vesicle membrane	0.00224925	0.72
cellular_component	GO:0000428	DNA-directed RNA polymerase complex	0.00227081	0.72
cellular_component	GO:0005813	centrosome	0.00227108	0.72
cellular_component	GO:0035577	azurophil granule membrane	0.00241682	0.72
molecular_function	GO:0042393	histone binding	0.00176605	0.73
cellular_component	GO:0098796	membrane protein complex	0.00261316	0.73
biological_process	GO:0009597	detection of virus	0.000424951	0.74
biological_process	GO:0016255	attachment of GPI anchor to protein	0.000424951	0.74
biological_process	GO:1901987	regulation of cell cycle phase transition	0.000425685	0.74
biological_process	GO:1990778	protein localization to cell periphery	0.000426852	0.74
biological_process	GO:0009260	ribonucleotide biosynthetic process	0.000432032	0.74
biological_process	GO:0042769	DNA damage response, detection of DNA damage	0.000434933	0.74
biological_process	GO:0072595	maintenance of protein localization in organelle	0.000434933	0.74
biological_process	GO:0070670	response to interleukin-4	0.000435457	0.74
biological_process	GO:0070301	cellular response to hydrogen peroxide	0.000436732	0.74
biological_process	GO:2000027	regulation of animal organ morphogenesis	0.000437532	0.74
biological_process	GO:0090316	positive regulation of intracellular protein transport	0.000441737	0.74
biological_process	GO:0002294	CD4-positive, alpha-beta T cell differentiation involved in immune response	0.000443227	0.74
biological_process	GO:0033260	nuclear DNA replication	0.000443227	0.74
biological_process	GO:0044706	multi-multicellular organism process	0.000443847	0.74
biological_process	GO:0048731	system development	0.000447401	0.74
biological_process	GO:0106106	cold-induced thermogenesis	0.000448377	0.74
biological_process	GO:0120161	regulation of cold-induced thermogenesis	0.000448377	0.74
biological_process	GO:0051239	regulation of multicellular organismal process	0.000449663	0.74
biological_process	GO:0002224	toll-like receptor signaling pathway	0.000450211	0.74
biological_process	GO:0042542	response to hydrogen peroxide	0.000450211	0.74
biological_process	GO:0098869	cellular oxidant detoxification	0.000451491	0.74
biological_process	GO:0044786	cell cycle DNA replication	0.000456439	0.74
biological_process	GO:0071479	cellular response to ionizing radiation	0.000456439	0.74
cellular_component	GO:0031901	early endosome membrane	0.00264581	0.74
cellular_component	GO:0030880	RNA polymerase complex	0.00275675	0.74
biological_process	GO:0006614	SRP-dependent cotranslational protein targeting to membrane	0.00046516	0.75
biological_process	GO:0034404	nucleobase-containing small molecule biosynthetic process	0.00046516	0.75
biological_process	GO:0044839	cell cycle G2/M phase transition	0.000470213	0.75
biological_process	GO:0071456	cellular response to hypoxia	0.000477131	0.75
biological_process	GO:0072659	protein localization to plasma membrane	0.000489837	0.75
biological_process	GO:0042982	amyloid precursor protein metabolic process	0.000490173	0.75
biological_process	GO:0046637	regulation of alpha-beta T cell differentiation	0.000490173	0.75
biological_process	GO:1900182	positive regulation of protein localization to nucleus	0.000490817	0.75
biological_process	GO:0090151	establishment of protein localization to mitochondrial membrane	0.000492096	0.75
biological_process	GO:0070262	peptidyl-serine dephosphorylation	0.000495707	0.75
biological_process	GO:0016042	lipid catabolic process	0.000505732	0.75
biological_process	GO:0043112	receptor metabolic process	0.000507367	0.75
biological_process	GO:0009649	entrainment of circadian clock	0.000509388	0.75
biological_process	GO:1902175	regulation of oxidative stress-induced intrinsic apoptotic signaling pathway	0.000509388	0.75
biological_process	GO:0198738	cell-cell signaling by wnt	0.000514347	0.75
biological_process	GO:0000184	nuclear-transcribed mRNA catabolic process, nonsense-mediated decay	0.000517538	0.75
biological_process	GO:0071466	cellular response to xenobiotic stimulus	0.000527837	0.76
biological_process	GO:0051289	protein homotetramerization	0.000528606	0.76
biological_process	GO:0006284	base-excision repair	0.000531436	0.76
biological_process	GO:0006165	nucleoside diphosphate phosphorylation	0.000541739	0.76
biological_process	GO:0045088	regulation of innate immune response	0.000551354	0.76
biological_process	GO:0006505	GPI anchor metabolic process	0.000552421	0.76
biological_process	GO:0006739	NADP metabolic process	0.000552421	0.76
biological_process	GO:1902107	positive regulation of leukocyte differentiation	0.000552544	0.76
biological_process	GO:0006270	DNA replication initiation	0.000555201	0.76
biological_process	GO:0043405	regulation of MAP kinase activity	0.000561785	0.76
biological_process	GO:0007623	circadian rhythm	0.00056523	0.76
biological_process	GO:0042093	T-helper cell differentiation	0.000566316	0.76
molecular_function	GO:0140030	modification-dependent protein binding	0.00187854	0.76
cellular_component	GO:0090734	site of DNA damage	0.00279549	0.76
cellular_component	GO:0030659	cytoplasmic vesicle membrane	0.00282633	0.76
biological_process	GO:0032608	interferon-beta production	0.000569895	0.77
biological_process	GO:0042398	cellular modified amino acid biosynthetic process	0.000569895	0.77
biological_process	GO:0006839	mitochondrial transport	0.00058075	0.77
biological_process	GO:0006612	protein targeting to membrane	0.000581503	0.77
biological_process	GO:0051301	cell division	0.000582941	0.77
biological_process	GO:0051223	regulation of protein transport	0.000585526	0.77
biological_process	GO:0044774	mitotic DNA integrity checkpoint	0.000595969	0.79
biological_process	GO:0045787	positive regulation of cell cycle	0.000604619	0.79
biological_process	GO:0072009	nephron epithelium development	0.000609341	0.79
biological_process	GO:0071560	cellular response to transforming growth factor beta stimulus	0.000617526	0.79
biological_process	GO:0002287	alpha-beta T cell activation involved in immune response	0.000625444	0.79
biological_process	GO:0002293	alpha-beta T cell differentiation involved in immune response	0.000625444	0.79
biological_process	GO:0071384	cellular response to corticosteroid stimulus	0.000625444	0.79
biological_process	GO:0032535	regulation of cellular component size	0.000630244	0.79
cellular_component	GO:0035098	ESC/E(Z) complex	0.00294739	0.79
biological_process	GO:0043618	regulation of transcription from RNA polymerase II promoter in response to stress	0.000649833	0.8
biological_process	GO:0009152	purine ribonucleotide biosynthetic process	0.000650602	0.8
biological_process	GO:0006650	glycerophospholipid metabolic process	0.000653672	0.8
biological_process	GO:0032879	regulation of localization	0.000656152	0.8
biological_process	GO:0019218	regulation of steroid metabolic process	0.000656915	0.8
biological_process	GO:0043620	regulation of DNA-templated transcription in response to stress	0.000662875	0.8
cellular_component	GO:0005815	microtubule organizing center	0.00303625	0.8
biological_process	GO:0006695	cholesterol biosynthetic process	0.000663607	0.81
biological_process	GO:0071229	cellular response to acid chemical	0.000667692	0.81
biological_process	GO:0042157	lipoprotein metabolic process	0.000667761	0.81
biological_process	GO:0070997	neuron death	0.00067061	0.81
biological_process	GO:1990845	adaptive thermogenesis	0.000674165	0.81
biological_process	GO:2000008	regulation of protein localization to cell surface	0.000680473	0.81
cellular_component	GO:0030867	rough endoplasmic reticulum membrane	0.00317573	0.81
cellular_component	GO:0005856	cytoskeleton	0.00319375	0.81
biological_process	GO:0002830	positive regulation of type 2 immune response	0.000680749	0.82
biological_process	GO:0034975	protein folding in endoplasmic reticulum	0.000680749	0.82
biological_process	GO:0060135	maternal process involved in female pregnancy	0.000682827	0.82
biological_process	GO:1901607	alpha-amino acid biosynthetic process	0.000682827	0.82
biological_process	GO:0006487	protein N-linked glycosylation	0.000702108	0.82
biological_process	GO:0048024	regulation of mRNA splicing, via spliceosome	0.000706968	0.82
biological_process	GO:0072163	mesonephric epithelium development	0.000706968	0.82
biological_process	GO:0072164	mesonephric tubule development	0.000706968	0.82
cellular_component	GO:0016020	membrane	0.0034138	0.84
cellular_component	GO:0000177	cytoplasmic exosome (RNase complex)	0.00367959	0.85
cellular_component	GO:0036020	endolysosome membrane	0.00367959	0.85
cellular_component	GO:0031463	Cul3-RING ubiquitin ligase complex	0.00374444	0.85
cellular_component	GO:0030667	secretory granule membrane	0.00413901	0.85
cellular_component	GO:0022624	proteasome accessory complex	0.00414905	0.85
cellular_component	GO:0044322	endoplasmic reticulum quality control compartment	0.00414905	0.85
cellular_component	GO:0042788	polysomal ribosome	0.00437479	0.85
molecular_function	GO:0003923	GPI-anchor transamidase activity	0.00195838	0.86
molecular_function	GO:0036033	mediator complex binding	0.00195838	0.86
molecular_function	GO:0050733	RS domain binding	0.00195838	0.86
cellular_component	GO:0016605	PML body	0.00438932	0.86
molecular_function	GO:0043022	ribosome binding	0.00217298	0.87
cellular_component	GO:0005684	U2-type spliceosomal complex	0.00452208	0.87
biological_process	GO:0006107	oxaloacetate metabolic process	0.0007083	0.88
biological_process	GO:0007042	lysosomal lumen acidification	0.0007083	0.88
biological_process	GO:0042092	type 2 immune response	0.000708915	0.88
biological_process	GO:0032868	response to insulin	0.000712351	0.88
biological_process	GO:0032648	regulation of interferon-beta production	0.000730216	0.88
biological_process	GO:0090199	regulation of release of cytochrome c from mitochondria	0.000730216	0.88
biological_process	GO:0008652	cellular amino acid biosynthetic process	0.000738352	0.88
biological_process	GO:0016126	sterol biosynthetic process	0.000738352	0.88
biological_process	GO:0031145	anaphase-promoting complex-dependent catabolic process	0.000738352	0.88
biological_process	GO:1901800	positive regulation of proteasomal protein catabolic process	0.000743045	0.88
biological_process	GO:0035690	cellular response to drug	0.000747442	0.88
biological_process	GO:0032802	low-density lipoprotein particle receptor catabolic process	0.0007669	0.88
biological_process	GO:0043558	regulation of translational initiation in response to stress	0.0007669	0.88
biological_process	GO:0006644	phospholipid metabolic process	0.000768888	0.88
biological_process	GO:0006297	nucleotide-excision repair, DNA gap filling	0.000789158	0.88
biological_process	GO:0032799	low-density lipoprotein receptor particle metabolic process	0.000789158	0.88
biological_process	GO:0033209	tumor necrosis factor-mediated signaling pathway	0.00079547	0.88
biological_process	GO:0048863	stem cell differentiation	0.000796278	0.88
biological_process	GO:0016236	macroautophagy	0.00079675	0.88
molecular_function	GO:0048038	quinone binding	0.00220496	0.88
molecular_function	GO:0003688	DNA replication origin binding	0.00231929	0.88
molecular_function	GO:0016741	transferase activity, transferring one-carbon groups	0.00234036	0.88
molecular_function	GO:0004386	helicase activity	0.00238173	0.88
molecular_function	GO:0070491	repressing transcription factor binding	0.00245385	0.88
cellular_component	GO:0017053	transcriptional repressor complex	0.00457264	0.88
cellular_component	GO:0005811	lipid droplet	0.00458347	0.88
cellular_component	GO:0031984	organelle subcompartment	0.00498961	0.88
cellular_component	GO:0016363	nuclear matrix	0.00509755	0.88
biological_process	GO:0035239	tube morphogenesis	0.000811999	0.89
molecular_function	GO:0002020	protease binding	0.00252349	0.89
molecular_function	GO:0035035	histone acetyltransferase binding	0.00252408	0.89
molecular_function	GO:0046966	thyroid hormone receptor binding	0.00252408	0.89
molecular_function	GO:0051059	NF-kappaB binding	0.00252408	0.89
molecular_function	GO:0001222	transcription corepressor binding	0.00255825	0.89
molecular_function	GO:0015037	peptide disulfide oxidoreductase activity	0.00255825	0.89
molecular_function	GO:0051536	iron-sulfur cluster binding	0.00260931	0.89
molecular_function	GO:0051540	metal cluster binding	0.00260931	0.89
biological_process	GO:0030647	aminoglycoside antibiotic metabolic process	0.000822816	0.9
biological_process	GO:0036500	ATF6-mediated unfolded protein response	0.000822816	0.9
biological_process	GO:0110096	cellular response to aldehyde	0.000822816	0.9
biological_process	GO:0006534	cysteine metabolic process	0.000825428	0.9
biological_process	GO:0035751	regulation of lysosomal lumen pH	0.000825428	0.9
biological_process	GO:0090085	regulation of protein deubiquitination	0.000825428	0.9
biological_process	GO:0006766	vitamin metabolic process	0.000828531	0.9
biological_process	GO:0046939	nucleotide phosphorylation	0.000828531	0.9
biological_process	GO:0031103	axon regeneration	0.00082909	0.9
biological_process	GO:1901991	negative regulation of mitotic cell cycle phase transition	0.000849724	0.9
biological_process	GO:1901990	regulation of mitotic cell cycle phase transition	0.000853873	0.9
biological_process	GO:0072080	nephron tubule development	0.000859655	0.9
biological_process	GO:0006164	purine nucleotide biosynthetic process	0.00086398	0.9
biological_process	GO:0007565	female pregnancy	0.00086398	0.9
biological_process	GO:0017038	protein import	0.00086398	0.9
biological_process	GO:0071902	positive regulation of protein serine/threonine kinase activity	0.000866824	0.9
biological_process	GO:0006521	regulation of cellular amino acid metabolic process	0.000870103	0.9
biological_process	GO:0032623	interleukin-2 production	0.000870103	0.9
biological_process	GO:0030111	regulation of Wnt signaling pathway	0.00087024	0.9
biological_process	GO:0046825	regulation of protein export from nucleus	0.000871842	0.9
biological_process	GO:0032647	regulation of interferon-alpha production	0.000887102	0.9
biological_process	GO:0051123	RNA polymerase II preinitiation complex assembly	0.000887102	0.9
biological_process	GO:1902653	secondary alcohol biosynthetic process	0.000887749	0.9
biological_process	GO:0018105	peptidyl-serine phosphorylation	0.000888561	0.9
biological_process	GO:0071214	cellular response to abiotic stimulus	0.000889916	0.9
biological_process	GO:0104004	cellular response to environmental stimulus	0.000889916	0.9
biological_process	GO:0048598	embryonic morphogenesis	0.000895099	0.9
biological_process	GO:0038061	NIK/NF-kappaB signaling	0.000900407	0.9
biological_process	GO:0043123	positive regulation of I-kappaB kinase/NF-kappaB signaling	0.000900407	0.9
biological_process	GO:0001818	negative regulation of cytokine production	0.000910956	0.9
biological_process	GO:1905330	regulation of morphogenesis of an epithelium	0.000911996	0.9
biological_process	GO:0051353	positive regulation of oxidoreductase activity	0.000925828	0.9
biological_process	GO:0002367	cytokine production involved in immune response	0.000925885	0.9
biological_process	GO:0002683	negative regulation of immune system process	0.000930253	0.9
biological_process	GO:0032480	negative regulation of type I interferon production	0.000936276	0.9
biological_process	GO:0071559	response to transforming growth factor beta	0.000940698	0.9
biological_process	GO:0097305	response to alcohol	0.000943472	0.9
biological_process	GO:0010634	positive regulation of epithelial cell migration	0.000944558	0.91
biological_process	GO:0072522	purine-containing compound biosynthetic process	0.000956733	0.91
biological_process	GO:0051260	protein homooligomerization	0.000969981	0.91
molecular_function	GO:0000062	fatty-acyl-CoA binding	0.00283791	0.91
molecular_function	GO:0016289	CoA hydrolase activity	0.00283791	0.91
molecular_function	GO:0016423	tRNA (guanine) methyltransferase activity	0.00290195	0.91
molecular_function	GO:0051117	ATPase binding	0.00292588	0.91
molecular_function	GO:0016765	transferase activity, transferring alkyl or aryl (other than methyl) groups	0.00296591	0.91
biological_process	GO:0036499	PERK-mediated unfolded protein response	0.000974861	0.92
biological_process	GO:0007259	receptor signaling pathway via JAK-STAT	0.000981127	0.92
biological_process	GO:0030856	regulation of epithelial cell differentiation	0.000988701	0.92
biological_process	GO:1903052	positive regulation of proteolysis involved in cellular protein catabolic process	0.00100139	0.92
biological_process	GO:0048754	branching morphogenesis of an epithelial tube	0.00100156	0.92
biological_process	GO:0071897	DNA biosynthetic process	0.00100558	0.92
biological_process	GO:0042177	negative regulation of protein catabolic process	0.00101684	0.92
biological_process	GO:1903039	positive regulation of leukocyte cell-cell adhesion	0.00104201	0.92
biological_process	GO:0032088	negative regulation of NF-kappaB transcription factor activity	0.00104492	0.92
biological_process	GO:0048468	cell development	0.00104884	0.92
biological_process	GO:1905475	regulation of protein localization to membrane	0.00105329	0.92
biological_process	GO:0051259	protein complex oligomerization	0.00106703	0.92
biological_process	GO:0043409	negative regulation of MAPK cascade	0.00106878	0.92
biological_process	GO:0031669	cellular response to nutrient levels	0.00107278	0.92
cellular_component	GO:0005862	muscle thin filament tropomyosin	0.00520078	0.92
cellular_component	GO:0033256	I-kappaB/NF-kappaB complex	0.00520078	0.92
cellular_component	GO:0035976	transcription factor AP-1 complex	0.00520078	0.92
cellular_component	GO:0070044	synaptobrevin 2-SNAP-25-syntaxin-1a complex	0.00520078	0.92
biological_process	GO:0051640	organelle localization	0.00108365	0.93
biological_process	GO:0033013	tetrapyrrole metabolic process	0.00110905	0.93
biological_process	GO:2000516	positive regulation of CD4-positive, alpha-beta T cell activation	0.00111778	0.93
biological_process	GO:0006779	porphyrin-containing compound biosynthetic process	0.00112232	0.93
biological_process	GO:0032897	negative regulation of viral transcription	0.00112232	0.93
biological_process	GO:0001657	ureteric bud development	0.00113038	0.93
biological_process	GO:0006363	termination of RNA polymerase I transcription	0.00115664	0.93
biological_process	GO:0048678	response to axon injury	0.00117553	0.93
biological_process	GO:0006301	postreplication repair	0.00118468	0.93
biological_process	GO:0016082	synaptic vesicle priming	0.00119535	0.93
biological_process	GO:0042987	amyloid precursor protein catabolic process	0.00120138	0.93
biological_process	GO:1903573	negative regulation of response to endoplasmic reticulum stress	0.00120138	0.93
biological_process	GO:0006354	DNA-templated transcription, elongation	0.00121708	0.93
cellular_component	GO:0101031	chaperone complex	0.0054273	0.93
biological_process	GO:0000041	transition metal ion transport	0.00124447	0.94
biological_process	GO:0060218	hematopoietic stem cell differentiation	0.00126949	0.94
biological_process	GO:0046777	protein autophosphorylation	0.00126983	0.94
biological_process	GO:0022407	regulation of cell-cell adhesion	0.00127303	0.94
biological_process	GO:0030178	negative regulation of Wnt signaling pathway	0.00128949	0.94
biological_process	GO:0051099	positive regulation of binding	0.00130362	0.94
biological_process	GO:1903363	negative regulation of cellular protein catabolic process	0.00131033	0.94
biological_process	GO:0046890	regulation of lipid biosynthetic process	0.00139034	0.94
biological_process	GO:0050810	regulation of steroid biosynthetic process	0.00140935	0.94
biological_process	GO:0071385	cellular response to glucocorticoid stimulus	0.00141404	0.94
molecular_function	GO:0000099	sulfur amino acid transmembrane transporter activity	0.00296812	0.94
molecular_function	GO:0004723	calcium-dependent protein serine/threonine phosphatase activity	0.00296812	0.94
molecular_function	GO:0016530	metallochaperone activity	0.00296812	0.94
molecular_function	GO:0031386	protein tag	0.00317577	0.94
molecular_function	GO:0140104	molecular carrier activity	0.00317577	0.94
molecular_function	GO:0016209	antioxidant activity	0.00320704	0.94
molecular_function	GO:0048306	calcium-dependent protein binding	0.00322667	0.94
cellular_component	GO:0030014	CCR4-NOT complex	0.00544342	0.94
cellular_component	GO:0099524	postsynaptic cytosol	0.00544342	0.94
cellular_component	GO:1902554	serine/threonine protein kinase complex	0.0056374	0.94
cellular_component	GO:0005791	rough endoplasmic reticulum	0.00568637	0.94
cellular_component	GO:0030670	phagocytic vesicle membrane	0.00576479	0.94
cellular_component	GO:0022627	cytosolic small ribosomal subunit	0.00609249	0.94
cellular_component	GO:0019898	extrinsic component of membrane	0.00617676	0.94
cellular_component	GO:0001650	fibrillar center	0.00618529	0.94
biological_process	GO:0034162	toll-like receptor 9 signaling pathway	0.00141763	0.95
biological_process	GO:0046639	negative regulation of alpha-beta T cell differentiation	0.00141763	0.95
biological_process	GO:0051220	cytoplasmic sequestering of protein	0.00141763	0.95
biological_process	GO:1902036	regulation of hematopoietic stem cell differentiation	0.00141874	0.95
biological_process	GO:0006740	NADPH regeneration	0.00145065	0.95
biological_process	GO:0042994	cytoplasmic sequestering of transcription factor	0.00145065	0.95
biological_process	GO:0043968	histone H2A acetylation	0.00145065	0.95
biological_process	GO:0048002	antigen processing and presentation of peptide antigen	0.00146631	0.95
biological_process	GO:2000058	regulation of ubiquitin-dependent protein catabolic process	0.00146983	0.95
biological_process	GO:2001237	negative regulation of extrinsic apoptotic signaling pathway	0.00147589	0.95
biological_process	GO:0015949	nucleobase-containing small molecule interconversion	0.00147786	0.95
biological_process	GO:0033014	tetrapyrrole biosynthetic process	0.00147786	0.95
biological_process	GO:0006606	protein import into nucleus	0.00149316	0.95
biological_process	GO:0007034	vacuolar transport	0.00149316	0.95
biological_process	GO:0030879	mammary gland development	0.00149316	0.95
biological_process	GO:0033559	unsaturated fatty acid metabolic process	0.00150431	0.95
biological_process	GO:0034605	cellular response to heat	0.00151143	0.95
biological_process	GO:0050684	regulation of mRNA processing	0.00151143	0.95
biological_process	GO:0072655	establishment of protein localization to mitochondrion	0.00151143	0.95
cellular_component	GO:0000790	nuclear chromatin	0.00648049	0.95
biological_process	GO:0007040	lysosome organization	0.00151939	0.96
biological_process	GO:0080171	lytic vacuole organization	0.00151939	0.96
biological_process	GO:2001244	positive regulation of intrinsic apoptotic signaling pathway	0.00151939	0.96
biological_process	GO:1905477	positive regulation of protein localization to membrane	0.00152877	0.96
biological_process	GO:0045926	negative regulation of growth	0.0015409	0.96
molecular_function	GO:0017116	single-stranded DNA helicase activity	0.00346142	0.96
molecular_function	GO:0016788	hydrolase activity, acting on ester bonds	0.00382893	0.96
molecular_function	GO:0004674	protein serine/threonine kinase activity	0.00385552	0.96
molecular_function	GO:0048027	mRNA 5'-UTR binding	0.00388684	0.96
molecular_function	GO:0140098	catalytic activity, acting on RNA	0.00418039	0.96
molecular_function	GO:0023026	MHC class II protein complex binding	0.00507037	0.98
molecular_function	GO:0003755	peptidyl-prolyl cis-trans isomerase activity	0.00519262	0.98
cellular_component	GO:0035748	myelin sheath abaxonal region	0.00650322	0.98
cellular_component	GO:0042824	MHC class I peptide loading complex	0.00650322	0.98
cellular_component	GO:0071986	Ragulator complex	0.00650322	0.98
cellular_component	GO:0030057	desmosome	0.00653961	0.98
cellular_component	GO:1905354	exoribonuclease complex	0.00653961	0.98
cellular_component	GO:0015629	actin cytoskeleton	0.00657335	0.98
biological_process	GO:0000965	mitochondrial RNA 3'-end processing	0.00155037	0.99
biological_process	GO:0006565	L-serine catabolic process	0.00155037	0.99
biological_process	GO:0009438	methylglyoxal metabolic process	0.00155037	0.99
biological_process	GO:0051029	rRNA transport	0.00155037	0.99
biological_process	GO:1903297	regulation of hypoxia-induced intrinsic apoptotic signaling pathway	0.00155037	0.99
biological_process	GO:1903298	negative regulation of hypoxia-induced intrinsic apoptotic signaling pathway	0.00155037	0.99
biological_process	GO:2000563	positive regulation of CD4-positive, alpha-beta T cell proliferation	0.00155037	0.99
biological_process	GO:0055072	iron ion homeostasis	0.00159452	0.99
biological_process	GO:0051656	establishment of organelle localization	0.00162741	0.99
biological_process	GO:0007178	transmembrane receptor protein serine/threonine kinase signaling pathway	0.00164352	0.99
biological_process	GO:0010823	negative regulation of mitochondrion organization	0.00166431	0.99
biological_process	GO:0045661	regulation of myoblast differentiation	0.00166431	0.99
biological_process	GO:1903037	regulation of leukocyte cell-cell adhesion	0.00168669	0.99
biological_process	GO:1901654	response to ketone	0.00169057	0.99
biological_process	GO:0009263	deoxyribonucleotide biosynthetic process	0.00173448	0.99
biological_process	GO:0015936	coenzyme A metabolic process	0.00173448	0.99
biological_process	GO:1904874	positive regulation of telomerase RNA localization to Cajal body	0.00173448	0.99
biological_process	GO:2001185	regulation of CD8-positive, alpha-beta T cell activation	0.00173448	0.99
biological_process	GO:0001819	positive regulation of cytokine production	0.00173726	0.99
biological_process	GO:0051348	negative regulation of transferase activity	0.00174359	0.99
biological_process	GO:0042771	intrinsic apoptotic signaling pathway in response to DNA damage by p53 class mediator	0.00174745	0.99
biological_process	GO:0051204	protein insertion into mitochondrial membrane	0.00174745	0.99
biological_process	GO:0006903	vesicle targeting	0.00175605	0.99
biological_process	GO:0046634	regulation of alpha-beta T cell activation	0.00175605	0.99
biological_process	GO:0031123	RNA 3'-end processing	0.00176505	0.99
biological_process	GO:0097327	response to antineoplastic agent	0.00178457	0.99
biological_process	GO:0006085	acetyl-CoA biosynthetic process	0.00178666	0.99
biological_process	GO:0006783	heme biosynthetic process	0.00178666	0.99
biological_process	GO:0032069	regulation of nuclease activity	0.00178666	0.99
biological_process	GO:0034311	diol metabolic process	0.00178666	0.99
biological_process	GO:0071359	cellular response to dsRNA	0.00178666	0.99
biological_process	GO:0090312	positive regulation of protein deacetylation	0.00178666	0.99
biological_process	GO:1901685	glutathione derivative metabolic process	0.00178666	0.99
biological_process	GO:1901687	glutathione derivative biosynthetic process	0.00178666	0.99
biological_process	GO:0006901	vesicle coating	0.00179314	0.99
biological_process	GO:0010256	endomembrane system organization	0.00179609	0.99
biological_process	GO:0000086	G2/M transition of mitotic cell cycle	0.00181234	0.99
biological_process	GO:0070585	protein localization to mitochondrion	0.00181563	0.99
biological_process	GO:0001823	mesonephros development	0.00182889	0.99
biological_process	GO:0046434	organophosphate catabolic process	0.00185323	0.99
biological_process	GO:0006406	mRNA export from nucleus	0.00186696	0.99
biological_process	GO:0071427	mRNA-containing ribonucleoprotein complex export from nucleus	0.00186696	0.99
biological_process	GO:0002698	negative regulation of immune effector process	0.00187623	0.99
biological_process	GO:0022612	gland morphogenesis	0.00187623	0.99
biological_process	GO:0002478	antigen processing and presentation of exogenous peptide antigen	0.00187904	0.99
biological_process	GO:0006955	immune response	0.00188253	0.99
biological_process	GO:0031102	neuron projection regeneration	0.00193355	0.99
biological_process	GO:0061448	connective tissue development	0.00193495	0.99
biological_process	GO:0048871	multicellular organismal homeostasis	0.00195004	0.99
biological_process	GO:0002369	T cell cytokine production	0.00198302	0.99
biological_process	GO:0016485	protein processing	0.00198502	0.99
biological_process	GO:0030099	myeloid cell differentiation	0.00198777	0.99
biological_process	GO:0051170	import into nucleus	0.00199991	0.99
biological_process	GO:0007183	SMAD protein complex assembly	0.00202802	0.99
biological_process	GO:0032530	regulation of microvillus organization	0.00202802	0.99
biological_process	GO:0048711	positive regulation of astrocyte differentiation	0.00202802	0.99
biological_process	GO:0090646	mitochondrial tRNA processing	0.00202802	0.99
biological_process	GO:0016050	vesicle organization	0.00205442	0.99
biological_process	GO:1902275	regulation of chromatin organization	0.00209489	0.99
biological_process	GO:0045639	positive regulation of myeloid cell differentiation	0.00218657	0.99
biological_process	GO:0008284	positive regulation of cell population proliferation	0.00218844	0.99
biological_process	GO:0009262	deoxyribonucleotide metabolic process	0.00220198	0.99
biological_process	GO:0032801	receptor catabolic process	0.00220198	0.99
biological_process	GO:0045622	regulation of T-helper cell differentiation	0.00220198	0.99
biological_process	GO:0000959	mitochondrial RNA metabolic process	0.00224388	0.99
biological_process	GO:0008631	intrinsic apoptotic signaling pathway in response to oxidative stress	0.00224388	0.99
molecular_function	GO:0050661	NADP binding	0.00565415	0.99
molecular_function	GO:0042578	phosphoric ester hydrolase activity	0.00574201	0.99
molecular_function	GO:0050750	low-density lipoprotein particle receptor binding	0.00597943	0.99
molecular_function	GO:0005095	GTPase inhibitor activity	0.0060577	0.99
molecular_function	GO:0016290	palmitoyl-CoA hydrolase activity	0.0060577	0.99
molecular_function	GO:0061659	ubiquitin-like protein ligase activity	0.00614943	0.99
molecular_function	GO:0070325	lipoprotein particle receptor binding	0.00621522	0.99
molecular_function	GO:0016860	intramolecular oxidoreductase activity	0.00643807	0.99
molecular_function	GO:0008168	methyltransferase activity	0.00648314	0.99
biological_process	GO:0032495	response to muramyl dipeptide	0.00224482	1
biological_process	GO:0032816	positive regulation of natural killer cell activation	0.00224482	1
biological_process	GO:0043371	negative regulation of CD4-positive, alpha-beta T cell differentiation	0.00224482	1
biological_process	GO:0043408	regulation of MAPK cascade	0.00225417	1
biological_process	GO:0022409	positive regulation of cell-cell adhesion	0.00225762	1
biological_process	GO:1901657	glycosyl compound metabolic process	0.00225951	1
biological_process	GO:0000101	sulfur amino acid transport	0.00227589	1
biological_process	GO:0006105	succinate metabolic process	0.00227589	1
biological_process	GO:0006267	pre-replicative complex assembly involved in nuclear cell cycle DNA replication	0.00227589	1
biological_process	GO:0006564	L-serine biosynthetic process	0.00227589	1
biological_process	GO:0010807	regulation of synaptic vesicle priming	0.00227589	1
biological_process	GO:0036388	pre-replicative complex assembly	0.00227589	1
biological_process	GO:1900038	negative regulation of cellular response to hypoxia	0.00227589	1
biological_process	GO:1902299	pre-replicative complex assembly involved in cell cycle DNA replication	0.00227589	1
biological_process	GO:1990144	intrinsic apoptotic signaling pathway in response to hypoxia	0.00227589	1
biological_process	GO:2000553	positive regulation of T-helper 2 cell cytokine production	0.00227589	1
biological_process	GO:0046501	protoporphyrinogen IX metabolic process	0.00228823	1
biological_process	GO:0051791	medium-chain fatty acid metabolic process	0.00228823	1
biological_process	GO:0071372	cellular response to follicle-stimulating hormone stimulus	0.00228823	1
biological_process	GO:1905146	lysosomal protein catabolic process	0.00228823	1
biological_process	GO:1990440	positive regulation of transcription from RNA polymerase II promoter in response to endoplasmic reticulum stress	0.00228823	1
biological_process	GO:2000551	regulation of T-helper 2 cell cytokine production	0.00228823	1
biological_process	GO:2001241	positive regulation of extrinsic apoptotic signaling pathway in absence of ligand	0.00228823	1
biological_process	GO:0002456	T cell mediated immunity	0.00229223	1
biological_process	GO:0042440	pigment metabolic process	0.0023574	1
biological_process	GO:0006517	protein deglycosylation	0.00236644	1
biological_process	GO:0032728	positive regulation of interferon-beta production	0.00236644	1
biological_process	GO:0006633	fatty acid biosynthetic process	0.0023678	1
biological_process	GO:0009648	photoperiodism	0.00241326	1
biological_process	GO:0001672	regulation of chromatin assembly or disassembly	0.00242692	1
biological_process	GO:0002428	antigen processing and presentation of peptide antigen via MHC class Ib	0.00242692	1
biological_process	GO:0016139	glycoside catabolic process	0.00242692	1
biological_process	GO:0060700	regulation of ribonuclease activity	0.00242692	1
biological_process	GO:0072642	interferon-alpha secretion	0.00242692	1
biological_process	GO:1902739	regulation of interferon-alpha secretion	0.00242692	1
biological_process	GO:1902741	positive regulation of interferon-alpha secretion	0.00242692	1
biological_process	GO:0048199	vesicle targeting, to, from or within Golgi	0.00243942	1
biological_process	GO:0018208	peptidyl-proline modification	0.00246108	1
biological_process	GO:0031648	protein destabilization	0.00249104	1
biological_process	GO:0060443	mammary gland morphogenesis	0.00249104	1
biological_process	GO:0000288	nuclear-transcribed mRNA catabolic process, deadenylation-dependent decay	0.00251235	1
biological_process	GO:0061418	regulation of transcription from RNA polymerase II promoter in response to hypoxia	0.00251235	1
biological_process	GO:0048194	Golgi vesicle budding	0.00257653	1
biological_process	GO:0032507	maintenance of protein location in cell	0.00260814	1
biological_process	GO:0006970	response to osmotic stress	0.00263236	1
biological_process	GO:0007159	leukocyte cell-cell adhesion	0.00266177	1
biological_process	GO:0044262	cellular carbohydrate metabolic process	0.00267869	1
biological_process	GO:0043124	negative regulation of I-kappaB kinase/NF-kappaB signaling	0.00272238	1
biological_process	GO:0071375	cellular response to peptide hormone stimulus	0.00273946	1
biological_process	GO:2000060	positive regulation of ubiquitin-dependent protein catabolic process	0.00278082	1
biological_process	GO:0090287	regulation of cellular response to growth factor stimulus	0.00278642	1
biological_process	GO:0032434	regulation of proteasomal ubiquitin-dependent protein catabolic process	0.00279063	1
biological_process	GO:0031124	mRNA 3'-end processing	0.00280139	1
biological_process	GO:0031065	positive regulation of histone deacetylation	0.00280818	1
biological_process	GO:0031293	membrane protein intracellular domain proteolysis	0.00280818	1
biological_process	GO:0043555	regulation of translation in response to stress	0.00280818	1
biological_process	GO:0046632	alpha-beta T cell differentiation	0.00281621	1
biological_process	GO:0051341	regulation of oxidoreductase activity	0.00283016	1
biological_process	GO:0002888	positive regulation of myeloid leukocyte mediated immunity	0.00283595	1
biological_process	GO:0090087	regulation of peptide transport	0.00284368	1
biological_process	GO:0008654	phospholipid biosynthetic process	0.00285176	1
biological_process	GO:1904951	positive regulation of establishment of protein localization	0.002877	1
biological_process	GO:0090092	regulation of transmembrane receptor protein serine/threonine kinase signaling pathway	0.0029278	1
biological_process	GO:0050777	negative regulation of immune response	0.00303038	1
biological_process	GO:0090090	negative regulation of canonical Wnt signaling pathway	0.00303911	1
biological_process	GO:0033598	mammary gland epithelial cell proliferation	0.00304395	1
biological_process	GO:0035456	response to interferon-beta	0.00304395	1
biological_process	GO:0061615	glycolytic process through fructose-6-phosphate	0.00304395	1
biological_process	GO:0061620	glycolytic process through glucose-6-phosphate	0.00304395	1
biological_process	GO:0048584	positive regulation of response to stimulus	0.00306595	1
biological_process	GO:0006469	negative regulation of protein kinase activity	0.00308099	1
biological_process	GO:0016578	histone deubiquitination	0.00308341	1
biological_process	GO:0033143	regulation of intracellular steroid hormone receptor signaling pathway	0.00315135	1
biological_process	GO:0048193	Golgi vesicle transport	0.00316627	1
biological_process	GO:0003416	endochondral bone growth	0.00319574	1
biological_process	GO:0009124	nucleoside monophosphate biosynthetic process	0.00319574	1
biological_process	GO:1901028	regulation of mitochondrial outer membrane permeabilization involved in apoptotic signaling pathway	0.00319574	1
biological_process	GO:0097696	receptor signaling pathway via STAT	0.00322267	1
biological_process	GO:0030433	ubiquitin-dependent ERAD pathway	0.00322441	1
biological_process	GO:0043407	negative regulation of MAP kinase activity	0.00322441	1
biological_process	GO:0061333	renal tubule morphogenesis	0.00322441	1
biological_process	GO:0000725	recombinational repair	0.00324234	1
biological_process	GO:0071478	cellular response to radiation	0.00325174	1
biological_process	GO:0045598	regulation of fat cell differentiation	0.00327969	1
biological_process	GO:0006361	transcription initiation from RNA polymerase I promoter	0.00328619	1
biological_process	GO:0001510	RNA methylation	0.00328691	1
biological_process	GO:0032436	positive regulation of proteasomal ubiquitin-dependent protein catabolic process	0.00328691	1
biological_process	GO:0033238	regulation of cellular amine metabolic process	0.00328691	1
biological_process	GO:0110110	positive regulation of animal organ morphogenesis	0.00328691	1
biological_process	GO:0045087	innate immune response	0.00331856	1
biological_process	GO:0002718	regulation of cytokine production involved in immune response	0.00333946	1
biological_process	GO:0010038	response to metal ion	0.00335622	1
biological_process	GO:2000026	regulation of multicellular organismal development	0.00337619	1
biological_process	GO:0051402	neuron apoptotic process	0.00342694	1
biological_process	GO:0002573	myeloid leukocyte differentiation	0.00343225	1
biological_process	GO:0032092	positive regulation of protein binding	0.00344359	1
biological_process	GO:0006690	icosanoid metabolic process	0.0034471	1
biological_process	GO:0042752	regulation of circadian rhythm	0.0034471	1
biological_process	GO:0043401	steroid hormone mediated signaling pathway	0.00347029	1
biological_process	GO:0006900	vesicle budding from membrane	0.00347981	1
biological_process	GO:0060351	cartilage development involved in endochondral bone morphogenesis	0.00348463	1
biological_process	GO:0044794	positive regulation by host of viral process	0.0034907	1
biological_process	GO:0009132	nucleoside diphosphate metabolic process	0.00352799	1
biological_process	GO:0002833	positive regulation of response to biotic stimulus	0.00360231	1
biological_process	GO:0002521	leukocyte differentiation	0.00360263	1
biological_process	GO:0045737	positive regulation of cyclin-dependent protein serine/threonine kinase activity	0.00365689	1
biological_process	GO:0052547	regulation of peptidase activity	0.00368066	1
biological_process	GO:0009100	glycoprotein metabolic process	0.00372373	1
biological_process	GO:0042274	ribosomal small subunit biogenesis	0.00374348	1
biological_process	GO:0070671	response to interleukin-12	0.00374937	1
biological_process	GO:0016571	histone methylation	0.00381787	1
biological_process	GO:0090068	positive regulation of cell cycle process	0.00385373	1
biological_process	GO:0055076	transition metal ion homeostasis	0.00392424	1
biological_process	GO:0035743	CD4-positive, alpha-beta T cell cytokine production	0.0039381	1
biological_process	GO:0042135	neurotransmitter catabolic process	0.0039381	1
biological_process	GO:0030308	negative regulation of cell growth	0.00394175	1
biological_process	GO:0006470	protein dephosphorylation	0.00394746	1
biological_process	GO:0050688	regulation of defense response to virus	0.0039508	1
biological_process	GO:0071222	cellular response to lipopolysaccharide	0.00395224	1
biological_process	GO:0030518	intracellular steroid hormone receptor signaling pathway	0.0039744	1
biological_process	GO:0098586	cellular response to virus	0.00398958	1
biological_process	GO:0000422	autophagy of mitochondrion	0.00403275	1
biological_process	GO:0006826	iron ion transport	0.00403275	1
biological_process	GO:0045454	cell redox homeostasis	0.00403275	1
biological_process	GO:0061726	mitochondrion disassembly	0.00403275	1
biological_process	GO:0072088	nephron epithelium morphogenesis	0.00403275	1
biological_process	GO:0007399	nervous system development	0.0040798	1
biological_process	GO:1900034	regulation of cellular response to heat	0.0041014	1
biological_process	GO:0042149	cellular response to glucose starvation	0.00410304	1
biological_process	GO:0006767	water-soluble vitamin metabolic process	0.0042363	1
biological_process	GO:0042558	pteridine-containing compound metabolic process	0.00423778	1
biological_process	GO:0001676	long-chain fatty acid metabolic process	0.00423811	1
biological_process	GO:0002286	T cell activation involved in immune response	0.00425839	1
biological_process	GO:1905269	positive regulation of chromatin organization	0.00427286	1
biological_process	GO:0120162	positive regulation of cold-induced thermogenesis	0.004282	1
biological_process	GO:0036295	cellular response to increased oxygen levels	0.00429804	1
biological_process	GO:0045064	T-helper 2 cell differentiation	0.00429804	1
biological_process	GO:2001252	positive regulation of chromosome organization	0.00430537	1
biological_process	GO:2001056	positive regulation of cysteine-type endopeptidase activity	0.00430778	1
biological_process	GO:0033673	negative regulation of kinase activity	0.00437883	1
biological_process	GO:0033619	membrane protein proteolysis	0.00439768	1
biological_process	GO:0043414	macromolecule methylation	0.00443062	1
biological_process	GO:0031056	regulation of histone modification	0.00445795	1
biological_process	GO:0022603	regulation of anatomical structure morphogenesis	0.00452836	1
biological_process	GO:0006952	defense response	0.00456588	1
biological_process	GO:0046824	positive regulation of nucleocytoplasmic transport	0.00456711	1
biological_process	GO:0070059	intrinsic apoptotic signaling pathway in response to endoplasmic reticulum stress	0.00456711	1
biological_process	GO:0007093	mitotic cell cycle checkpoint	0.00458784	1
biological_process	GO:0000724	double-strand break repair via homologous recombination	0.00467459	1
biological_process	GO:0009166	nucleotide catabolic process	0.00471486	1
biological_process	GO:0000083	regulation of transcription involved in G1/S transition of mitotic cell cycle	0.0047219	1
biological_process	GO:0035666	TRIF-dependent toll-like receptor signaling pathway	0.0047219	1
biological_process	GO:2000515	negative regulation of CD4-positive, alpha-beta T cell activation	0.0047219	1
biological_process	GO:0030154	cell differentiation	0.00472804	1
biological_process	GO:1902807	negative regulation of cell cycle G1/S phase transition	0.00474344	1
biological_process	GO:0051193	regulation of cofactor metabolic process	0.0047779	1
biological_process	GO:0052372	modulation by symbiont of entry into host	0.0047779	1
biological_process	GO:0007595	lactation	0.00478897	1
biological_process	GO:2000134	negative regulation of G1/S transition of mitotic cell cycle	0.00487419	1
biological_process	GO:0046031	ADP metabolic process	0.00493536	1
biological_process	GO:1901292	nucleoside phosphate catabolic process	0.00495023	1
biological_process	GO:0019184	nonribosomal peptide biosynthetic process	0.00502581	1
biological_process	GO:0032780	negative regulation of ATPase activity	0.00502581	1
biological_process	GO:0034312	diol biosynthetic process	0.00502581	1
biological_process	GO:0046112	nucleobase biosynthetic process	0.00502581	1
biological_process	GO:0090201	negative regulation of release of cytochrome c from mitochondria	0.00502581	1
biological_process	GO:0090670	RNA localization to Cajal body	0.00502581	1
biological_process	GO:0090671	telomerase RNA localization to Cajal body	0.00502581	1
biological_process	GO:0090672	telomerase RNA localization	0.00502581	1
biological_process	GO:0090685	RNA localization to nucleus	0.00502581	1
biological_process	GO:1902176	negative regulation of oxidative stress-induced intrinsic apoptotic signaling pathway	0.00502581	1
biological_process	GO:0006661	phosphatidylinositol biosynthetic process	0.00504718	1
biological_process	GO:0031579	membrane raft organization	0.00505206	1
biological_process	GO:0019882	antigen processing and presentation	0.00506808	1
biological_process	GO:0006096	glycolytic process	0.0050969	1
biological_process	GO:0090263	positive regulation of canonical Wnt signaling pathway	0.00516514	1
biological_process	GO:0043462	regulation of ATPase activity	0.00517205	1
biological_process	GO:0006983	ER overload response	0.00521385	1
biological_process	GO:0060742	epithelial cell differentiation involved in prostate gland development	0.00521385	1
biological_process	GO:0031532	actin cytoskeleton reorganization	0.00524141	1
biological_process	GO:1903008	organelle disassembly	0.00524141	1
biological_process	GO:0045807	positive regulation of endocytosis	0.0052607	1
biological_process	GO:0006497	protein lipidation	0.00526578	1
biological_process	GO:0002832	negative regulation of response to biotic stimulus	0.00527176	1
biological_process	GO:0006734	NADH metabolic process	0.00527252	1
biological_process	GO:0071470	cellular response to osmotic stress	0.00527252	1
biological_process	GO:0090184	positive regulation of kidney development	0.00527252	1
biological_process	GO:0051347	positive regulation of transferase activity	0.00530888	1
biological_process	GO:0097345	mitochondrial outer membrane permeabilization	0.00534051	1
biological_process	GO:0009308	amine metabolic process	0.00545088	1
biological_process	GO:0046631	alpha-beta T cell activation	0.00545088	1
biological_process	GO:0007033	vacuole organization	0.00546273	1
biological_process	GO:0006356	regulation of transcription by RNA polymerase I	0.00547235	1
biological_process	GO:0032814	regulation of natural killer cell activation	0.00547235	1
biological_process	GO:0046949	fatty-acyl-CoA biosynthetic process	0.00547235	1
biological_process	GO:1901661	quinone metabolic process	0.00547235	1
biological_process	GO:1902235	regulation of endoplasmic reticulum stress-induced intrinsic apoptotic signaling pathway	0.00547235	1
biological_process	GO:0019884	antigen processing and presentation of exogenous antigen	0.00552113	1
biological_process	GO:0019320	hexose catabolic process	0.00556829	1
biological_process	GO:1901799	negative regulation of proteasomal protein catabolic process	0.00556829	1
biological_process	GO:0021915	neural tube development	0.00558126	1
biological_process	GO:1902105	regulation of leukocyte differentiation	0.00558748	1
biological_process	GO:0051222	positive regulation of protein transport	0.00560761	1
biological_process	GO:0043280	positive regulation of cysteine-type endopeptidase activity involved in apoptotic process	0.00563596	1
biological_process	GO:0000960	regulation of mitochondrial RNA catabolic process	0.00565552	1
biological_process	GO:0006121	mitochondrial electron transport, succinate to ubiquinone	0.00565552	1
biological_process	GO:0009753	response to jasmonic acid	0.00565552	1
biological_process	GO:0010847	regulation of chromatin assembly	0.00565552	1
biological_process	GO:0019322	pentose biosynthetic process	0.00565552	1
biological_process	GO:0030043	actin filament fragmentation	0.00565552	1
biological_process	GO:0030423	targeting of mRNA for destruction involved in RNA interference	0.00565552	1
biological_process	GO:0031554	regulation of DNA-templated transcription, termination	0.00565552	1
biological_process	GO:0035549	positive regulation of interferon-beta secretion	0.00565552	1
biological_process	GO:0061009	common bile duct development	0.00565552	1
biological_process	GO:0071211	protein targeting to vacuole involved in autophagy	0.00565552	1
biological_process	GO:0071395	cellular response to jasmonic acid stimulus	0.00565552	1
biological_process	GO:1902292	cell cycle DNA replication initiation	0.00565552	1
biological_process	GO:1902315	nuclear cell cycle DNA replication initiation	0.00565552	1
biological_process	GO:1902975	mitotic DNA replication initiation	0.00565552	1
biological_process	GO:2001200	positive regulation of dendritic cell differentiation	0.00565552	1
biological_process	GO:0043467	regulation of generation of precursor metabolites and energy	0.0057007	1
biological_process	GO:0000413	protein peptidyl-prolyl isomerization	0.0057197	1
biological_process	GO:0044106	cellular amine metabolic process	0.00572594	1
biological_process	GO:0090101	negative regulation of transmembrane receptor protein serine/threonine kinase signaling pathway	0.00581371	1
biological_process	GO:0090501	RNA phosphodiester bond hydrolysis	0.00582092	1
biological_process	GO:0042255	ribosome assembly	0.00593591	1
biological_process	GO:0051235	maintenance of location	0.00595523	1
biological_process	GO:0048869	cellular developmental process	0.00596558	1
biological_process	GO:0090305	nucleic acid phosphodiester bond hydrolysis	0.00601703	1
biological_process	GO:0051345	positive regulation of hydrolase activity	0.00605052	1
biological_process	GO:0048207	vesicle targeting, rough ER to cis-Golgi	0.00607943	1
biological_process	GO:0048208	COPII vesicle coating	0.00607943	1
biological_process	GO:0006735	NADH regeneration	0.00610645	1
biological_process	GO:0039528	cytoplasmic pattern recognition receptor signaling pathway in response to virus	0.00610645	1
biological_process	GO:0061621	canonical glycolysis	0.00610645	1
biological_process	GO:0061718	glucose catabolic process to pyruvate	0.00610645	1
biological_process	GO:0001504	neurotransmitter uptake	0.00611942	1
biological_process	GO:0032527	protein exit from endoplasmic reticulum	0.00611942	1
biological_process	GO:0006757	ATP generation from ADP	0.00613391	1
biological_process	GO:0060349	bone morphogenesis	0.00613391	1
biological_process	GO:0001893	maternal placenta development	0.00616048	1
biological_process	GO:1904031	positive regulation of cyclin-dependent protein kinase activity	0.00616048	1
biological_process	GO:0007084	mitotic nuclear envelope reassembly	0.00616984	1
biological_process	GO:0010998	regulation of translational initiation by eIF2 alpha phosphorylation	0.00616984	1
biological_process	GO:0032070	regulation of deoxyribonuclease activity	0.00616984	1
biological_process	GO:0035871	protein K11-linked deubiquitination	0.00616984	1
biological_process	GO:0044359	modulation of molecular function in other organism	0.00616984	1
biological_process	GO:0052205	modulation of molecular function in other organism involved in symbiotic interaction	0.00616984	1
biological_process	GO:0070862	negative regulation of protein exit from endoplasmic reticulum	0.00616984	1
biological_process	GO:0071501	cellular response to sterol depletion	0.00616984	1
biological_process	GO:0072641	type I interferon secretion	0.00616984	1
biological_process	GO:0002822	regulation of adaptive immune response based on somatic recombination of immune receptors built from immunoglobulin superfamily domains	0.00618441	1
biological_process	GO:0060828	regulation of canonical Wnt signaling pathway	0.00624052	1
biological_process	GO:1902806	regulation of cell cycle G1/S phase transition	0.00626036	1
biological_process	GO:0090114	COPII-coated vesicle budding	0.00629531	1
biological_process	GO:1903051	negative regulation of proteolysis involved in cellular protein catabolic process	0.00629531	1
biological_process	GO:0046467	membrane lipid biosynthetic process	0.00630582	1
biological_process	GO:0000079	regulation of cyclin-dependent protein serine/threonine kinase activity	0.00637793	1
biological_process	GO:2000379	positive regulation of reactive oxygen species metabolic process	0.00637793	1
biological_process	GO:0006750	glutathione biosynthetic process	0.00640506	1
biological_process	GO:0016254	preassembly of GPI anchor in ER membrane	0.00640506	1
biological_process	GO:0033599	regulation of mammary gland epithelial cell proliferation	0.00640506	1
biological_process	GO:0071360	cellular response to exogenous dsRNA	0.00640506	1
biological_process	GO:1904380	endoplasmic reticulum mannose trimming	0.00640506	1
biological_process	GO:0045860	positive regulation of protein kinase activity	0.00642686	1
biological_process	GO:0072028	nephron morphogenesis	0.00642837	1
biological_process	GO:0006836	neurotransmitter transport	0.00644785	1
biological_process	GO:2001021	negative regulation of response to DNA damage stimulus	0.00646809	1
biological_process	GO:0002448	mast cell mediated immunity	0.00647286	1
biological_process	GO:0071349	cellular response to interleukin-12	0.00647286	1
biological_process	GO:2001238	positive regulation of extrinsic apoptotic signaling pathway	0.00647286	1
biological_process	GO:0006476	protein deacetylation	0.00648297	1
biological_process	GO:1901655	cellular response to ketone	0.00648297	1
biological_process	GO:0045445	myoblast differentiation	0.00649202	1
biological_process	GO:0001656	metanephros development	0.00649817	1
biological_process	GO:0031629	synaptic vesicle fusion to presynaptic active zone membrane	0.00651983	1
biological_process	GO:0051457	maintenance of protein location in nucleus	0.00651983	1
biological_process	GO:0022408	negative regulation of cell-cell adhesion	0.00652038	1
biological_process	GO:0071219	cellular response to molecule of bacterial origin	0.00659148	1
biological_process	GO:0046636	negative regulation of alpha-beta T cell activation	0.00678177	1
biological_process	GO:0006997	nucleus organization	0.00678551	1
biological_process	GO:1901214	regulation of neuron death	0.00681329	1
molecular_function	GO:0005173	stem cell factor receptor binding	0.00681773	1
molecular_function	GO:0008309	double-stranded DNA exodeoxyribonuclease activity	0.00681773	1
molecular_function	GO:0009019	tRNA (guanine-N1-)-methyltransferase activity	0.00681773	1
molecular_function	GO:0016508	long-chain-enoyl-CoA hydratase activity	0.00681773	1
molecular_function	GO:0033743	peptide-methionine (R)-S-oxide reductase activity	0.00681773	1
molecular_function	GO:1903135	cupric ion binding	0.00681773	1
molecular_function	GO:0030674	protein-macromolecule adaptor activity	0.00685822	1
biological_process	GO:0007507	heart development	0.00696881	1
biological_process	GO:0002476	antigen processing and presentation of endogenous peptide antigen via MHC class Ib	0.00697867	1
biological_process	GO:0006348	chromatin silencing at telomere	0.00697867	1
biological_process	GO:0006729	tetrahydrobiopterin biosynthetic process	0.00697867	1
biological_process	GO:0009304	tRNA transcription	0.00697867	1
biological_process	GO:0010966	regulation of phosphate transport	0.00697867	1
biological_process	GO:0019682	glyceraldehyde-3-phosphate metabolic process	0.00697867	1
biological_process	GO:0032071	regulation of endodeoxyribonuclease activity	0.00697867	1
biological_process	GO:0033601	positive regulation of mammary gland epithelial cell proliferation	0.00697867	1
biological_process	GO:0036480	neuron intrinsic apoptotic signaling pathway in response to oxidative stress	0.00697867	1
biological_process	GO:0042780	tRNA 3'-end processing	0.00697867	1
biological_process	GO:0044362	negative regulation of molecular function in other organism	0.00697867	1
biological_process	GO:0044387	negative regulation of protein kinase activity by regulation of protein phosphorylation	0.00697867	1
biological_process	GO:0046146	tetrahydrobiopterin metabolic process	0.00697867	1
biological_process	GO:0052204	negative regulation of molecular function in other organism involved in symbiotic interaction	0.00697867	1
biological_process	GO:0072718	response to cisplatin	0.00697867	1
biological_process	GO:0110095	cellular detoxification of aldehyde	0.00697867	1
biological_process	GO:1901029	negative regulation of mitochondrial outer membrane permeabilization involved in apoptotic signaling pathway	0.00697867	1
biological_process	GO:1902949	positive regulation of tau-protein kinase activity	0.00697867	1
biological_process	GO:1903376	regulation of oxidative stress-induced neuron intrinsic apoptotic signaling pathway	0.00697867	1
biological_process	GO:0001736	establishment of planar polarity	0.00701691	1
biological_process	GO:0007164	establishment of tissue polarity	0.00701691	1
biological_process	GO:0006302	double-strand break repair	0.00702169	1
biological_process	GO:0044273	sulfur compound catabolic process	0.00704943	1
biological_process	GO:0001844	protein insertion into mitochondrial membrane involved in apoptotic signaling pathway	0.00707736	1
biological_process	GO:0006362	transcription elongation from RNA polymerase I promoter	0.00707736	1
biological_process	GO:0043372	positive regulation of CD4-positive, alpha-beta T cell differentiation	0.00707736	1
biological_process	GO:0046596	regulation of viral entry into host cell	0.00707736	1
molecular_function	GO:0019902	phosphatase binding	0.00708198	1
molecular_function	GO:0001054	RNA polymerase I activity	0.00712857	1
molecular_function	GO:0016668	oxidoreductase activity, acting on a sulfur group of donors, NAD(P) as acceptor	0.00712857	1
molecular_function	GO:1990825	sequence-specific mRNA binding	0.00712857	1
biological_process	GO:0048675	axon extension	0.00712902	1
biological_process	GO:0006102	isocitrate metabolic process	0.00717749	1
biological_process	GO:0006573	valine metabolic process	0.00717749	1
biological_process	GO:0030091	protein repair	0.00717749	1
biological_process	GO:0032534	regulation of microvillus assembly	0.00717749	1
biological_process	GO:0033869	nucleoside bisphosphate catabolic process	0.00717749	1
biological_process	GO:0034031	ribonucleoside bisphosphate catabolic process	0.00717749	1
biological_process	GO:0034034	purine nucleoside bisphosphate catabolic process	0.00717749	1
biological_process	GO:0035964	COPI-coated vesicle budding	0.00717749	1
biological_process	GO:0048200	Golgi transport vesicle coating	0.00717749	1
biological_process	GO:0048205	COPI coating of Golgi vesicle	0.00717749	1
biological_process	GO:0061419	positive regulation of transcription from RNA polymerase II promoter in response to hypoxia	0.00717749	1
biological_process	GO:1902525	regulation of protein monoubiquitination	0.00717749	1
biological_process	GO:2001188	regulation of T cell activation via T cell receptor contact with antigen bound to MHC molecule on antigen presenting cell	0.00717749	1
cellular_component	GO:0030660	Golgi-associated vesicle membrane	0.0071898	1
biological_process	GO:0043406	positive regulation of MAP kinase activity	0.00723655	1
biological_process	GO:0051250	negative regulation of lymphocyte activation	0.0072416	1
molecular_function	GO:0008094	DNA-dependent ATPase activity	0.00724388	1
molecular_function	GO:0140296	general transcription initiation factor binding	0.00727238	1
biological_process	GO:0032869	cellular response to insulin stimulus	0.00728709	1
biological_process	GO:0007520	myoblast fusion	0.00733543	1
biological_process	GO:0044344	cellular response to fibroblast growth factor stimulus	0.00739402	1
biological_process	GO:0002065	columnar/cuboidal epithelial cell differentiation	0.00744447	1
biological_process	GO:0051050	positive regulation of transport	0.00746864	1
biological_process	GO:0010803	regulation of tumor necrosis factor-mediated signaling pathway	0.00746984	1
biological_process	GO:0044766	multi-organism transport	0.00746984	1
biological_process	GO:0045604	regulation of epidermal cell differentiation	0.00746984	1
biological_process	GO:1902579	multi-organism localization	0.00746984	1
biological_process	GO:1903902	positive regulation of viral life cycle	0.00746984	1
biological_process	GO:0009416	response to light stimulus	0.00755752	1
biological_process	GO:1905114	cell surface receptor signaling pathway involved in cell-cell signaling	0.0075809	1
molecular_function	GO:0016675	oxidoreductase activity, acting on a heme group of donors	0.00759129	1
molecular_function	GO:0003682	chromatin binding	0.00760197	1
biological_process	GO:1904029	regulation of cyclin-dependent protein kinase activity	0.00763082	1
biological_process	GO:0006665	sphingolipid metabolic process	0.00771118	1
biological_process	GO:0035601	protein deacylation	0.00771449	1
biological_process	GO:0043967	histone H4 acetylation	0.00775652	1
biological_process	GO:0036503	ERAD pathway	0.00779059	1
biological_process	GO:0035850	epithelial cell differentiation involved in kidney development	0.00782301	1
biological_process	GO:0070897	transcription preinitiation complex assembly	0.00782301	1
biological_process	GO:0007006	mitochondrial membrane organization	0.00785315	1
biological_process	GO:0002709	regulation of T cell mediated immunity	0.00785652	1
biological_process	GO:0070988	demethylation	0.00785652	1
biological_process	GO:0002719	negative regulation of cytokine production involved in immune response	0.00791076	1
biological_process	GO:0009299	mRNA transcription	0.00791076	1
biological_process	GO:0045672	positive regulation of osteoclast differentiation	0.00791076	1
biological_process	GO:0051156	glucose 6-phosphate metabolic process	0.00791076	1
biological_process	GO:0060330	regulation of response to interferon-gamma	0.00791076	1
biological_process	GO:0060334	regulation of interferon-gamma-mediated signaling pathway	0.00791076	1
biological_process	GO:0060444	branching involved in mammary gland duct morphogenesis	0.00791076	1
biological_process	GO:0042158	lipoprotein biosynthetic process	0.00791597	1
biological_process	GO:0060993	kidney morphogenesis	0.00791597	1
biological_process	GO:0043627	response to estrogen	0.00793101	1
biological_process	GO:0002756	MyD88-independent toll-like receptor signaling pathway	0.00795366	1
biological_process	GO:0009156	ribonucleoside monophosphate biosynthetic process	0.00795366	1
biological_process	GO:0019692	deoxyribose phosphate metabolic process	0.00795366	1
biological_process	GO:0060603	mammary gland duct morphogenesis	0.00795366	1
biological_process	GO:0046902	regulation of mitochondrial membrane permeability	0.00798233	1
molecular_function	GO:0016859	cis-trans isomerase activity	0.00801328	1
biological_process	GO:0034644	cellular response to UV	0.00802411	1
molecular_function	GO:0016684	oxidoreductase activity, acting on peroxide as acceptor	0.00807089	1
molecular_function	GO:0016790	thiolester hydrolase activity	0.00812169	1
biological_process	GO:0000098	sulfur amino acid catabolic process	0.00814338	1
biological_process	GO:0006098	pentose-phosphate shunt	0.00814338	1
biological_process	GO:0007039	protein catabolic process in the vacuole	0.00814338	1
biological_process	GO:0019321	pentose metabolic process	0.00814338	1
biological_process	GO:0033008	positive regulation of mast cell activation involved in immune response	0.00814338	1
biological_process	GO:0042762	regulation of sulfur metabolic process	0.00814338	1
biological_process	GO:0043306	positive regulation of mast cell degranulation	0.00814338	1
biological_process	GO:0072160	nephron tubule epithelial cell differentiation	0.00814338	1
biological_process	GO:0010595	positive regulation of endothelial cell migration	0.00815754	1
molecular_function	GO:0030957	Tat protein binding	0.00818071	1
biological_process	GO:0035722	interleukin-12-mediated signaling pathway	0.00824751	1
biological_process	GO:0043303	mast cell degranulation	0.00824751	1
biological_process	GO:0098868	bone growth	0.00824751	1
biological_process	GO:1900744	regulation of p38MAPK cascade	0.00824751	1
biological_process	GO:2001239	regulation of extrinsic apoptotic signaling pathway in absence of ligand	0.00824751	1
biological_process	GO:0050920	regulation of chemotaxis	0.00825632	1
molecular_function	GO:0005525	GTP binding	0.00837491	1
cellular_component	GO:1902555	endoribonuclease complex	0.00838671	1
biological_process	GO:0042276	error-prone translesion synthesis	0.0084248	1
biological_process	GO:0050860	negative regulation of T cell receptor signaling pathway	0.0084248	1
biological_process	GO:0070987	error-free translesion synthesis	0.0084248	1
biological_process	GO:0002262	myeloid cell homeostasis	0.00844729	1
biological_process	GO:0016999	antibiotic metabolic process	0.00845676	1
biological_process	GO:0007254	JNK cascade	0.00849004	1
biological_process	GO:0060070	canonical Wnt signaling pathway	0.00854132	1
cellular_component	GO:0031902	late endosome membrane	0.00854504	1
biological_process	GO:0002931	response to ischemia	0.00861275	1
biological_process	GO:0032873	negative regulation of stress-activated MAPK cascade	0.00861275	1
biological_process	GO:0070303	negative regulation of stress-activated protein kinase signaling cascade	0.00861275	1
biological_process	GO:0007162	negative regulation of cell adhesion	0.00863288	1
biological_process	GO:0032103	positive regulation of response to external stimulus	0.00869916	1
biological_process	GO:0006007	glucose catabolic process	0.00873221	1
biological_process	GO:0009112	nucleobase metabolic process	0.00873221	1
biological_process	GO:0030224	monocyte differentiation	0.00873221	1
biological_process	GO:0033572	transferrin transport	0.00873221	1
biological_process	GO:1903131	mononuclear cell differentiation	0.00873221	1
cellular_component	GO:0030427	site of polarized growth	0.00873931	1
molecular_function	GO:0016462	pyrophosphatase activity	0.00877844	1
cellular_component	GO:0098791	Golgi subcompartment	0.00880068	1
biological_process	GO:0008361	regulation of cell size	0.00882168	1
molecular_function	GO:0017111	nucleoside-triphosphatase activity	0.0089152	1
biological_process	GO:0002819	regulation of adaptive immune response	0.00892231	1
biological_process	GO:1903307	positive regulation of regulated secretory pathway	0.00892293	1
molecular_function	GO:0004301	epoxide hydrolase activity	0.00893798	1
molecular_function	GO:0016635	oxidoreductase activity, acting on the CH-CH group of donors, quinone or related compound as acceptor	0.00893798	1
molecular_function	GO:0032552	deoxyribonucleotide binding	0.00893798	1
molecular_function	GO:0043878	glyceraldehyde-3-phosphate dehydrogenase (NAD+) (non-phosphorylating) activity	0.00893798	1
molecular_function	GO:0004300	enoyl-CoA hydratase activity	0.00896987	1
molecular_function	GO:0003924	GTPase activity	0.00900335	1
cellular_component	GO:0005736	RNA polymerase I complex	0.00900826	1
biological_process	GO:0046916	cellular transition metal ion homeostasis	0.00902212	1
biological_process	GO:0090175	regulation of establishment of planar polarity	0.00902212	1
molecular_function	GO:0008013	beta-catenin binding	0.00905543	1
cellular_component	GO:0005844	polysome	0.00909175	1
cellular_component	GO:0010494	cytoplasmic stress granule	0.00915556	1
molecular_function	GO:0004724	magnesium-dependent protein serine/threonine phosphatase activity	0.00916382	1
biological_process	GO:0000904	cell morphogenesis involved in differentiation	0.00916441	1
biological_process	GO:0000768	syncytium formation by plasma membrane fusion	0.0091824	1
biological_process	GO:0046148	pigment biosynthetic process	0.0091824	1
biological_process	GO:0140253	cell-cell fusion	0.0091824	1
biological_process	GO:1903078	positive regulation of protein localization to plasma membrane	0.0091824	1
biological_process	GO:1903825	organic acid transmembrane transport	0.00921138	1
biological_process	GO:1905039	carboxylic acid transmembrane transport	0.00921138	1
biological_process	GO:0034248	regulation of cellular amide metabolic process	0.00924773	1
biological_process	GO:0098732	macromolecule deacylation	0.00927686	1
biological_process	GO:0051146	striated muscle cell differentiation	0.00930529	1
molecular_function	GO:0016830	carbon-carbon lyase activity	0.00935962	1
biological_process	GO:0033683	nucleotide-excision repair, DNA incision	0.00941472	1
biological_process	GO:0050856	regulation of T cell receptor signaling pathway	0.00941472	1
biological_process	GO:0050870	positive regulation of T cell activation	0.00948961	1
biological_process	GO:0051205	protein insertion into membrane	0.00956626	1
cellular_component	GO:0030027	lamellipodium	0.00957177	1
biological_process	GO:1903076	regulation of protein localization to plasma membrane	0.00960279	1
molecular_function	GO:0003730	mRNA 3'-UTR binding	0.00961998	1
biological_process	GO:0060627	regulation of vesicle-mediated transport	0.009652	1
cellular_component	GO:0016592	mediator complex	0.00973195	1
molecular_function	GO:0051537	2 iron, 2 sulfur cluster binding	0.00974925	1
biological_process	GO:0071230	cellular response to amino acid stimulus	0.00979659	1
biological_process	GO:0035148	tube formation	0.00981701	1
biological_process	GO:0090559	regulation of membrane permeability	0.00983071	1
biological_process	GO:0070373	negative regulation of ERK1 and ERK2 cascade	0.00990188	1
biological_process	GO:0072078	nephron tubule morphogenesis	0.00990188	1
biological_process	GO:0016575	histone deacetylation	0.00991539	1
molecular_function	GO:0015932	nucleobase-containing compound transmembrane transporter activity	0.00998039	1
cellular_component	GO:0070820	tertiary granule	0.00999409	1
biological_process	GO:0030182	neuron differentiation	0.0101606	1
biological_process	GO:0060560	developmental growth involved in morphogenesis	0.0102365	1
biological_process	GO:0000715	nucleotide-excision repair, DNA damage recognition	0.0102687	1
biological_process	GO:0009251	glucan catabolic process	0.0102687	1
biological_process	GO:0032703	negative regulation of interleukin-2 production	0.0102687	1
biological_process	GO:0089718	amino acid import across plasma membrane	0.0102687	1
biological_process	GO:0097150	neuronal stem cell population maintenance	0.0102687	1
biological_process	GO:0099500	vesicle fusion to plasma membrane	0.0102687	1
biological_process	GO:0002724	regulation of T cell cytokine production	0.0102841	1
biological_process	GO:0070306	lens fiber cell differentiation	0.0102841	1
cellular_component	GO:0045335	phagocytic vesicle	0.0102899	1
biological_process	GO:0001765	membrane raft assembly	0.0103112	1
biological_process	GO:0035745	T-helper 2 cell cytokine production	0.0103112	1
biological_process	GO:0042178	xenobiotic catabolic process	0.0103112	1
biological_process	GO:0042532	negative regulation of tyrosine phosphorylation of STAT protein	0.0103112	1
biological_process	GO:0046831	regulation of RNA export from nucleus	0.0103112	1
biological_process	GO:0072182	regulation of nephron tubule epithelial cell differentiation	0.0103112	1
biological_process	GO:0098712	L-glutamate import across plasma membrane	0.0103112	1
biological_process	GO:1903960	negative regulation of anion transmembrane transport	0.0103112	1
biological_process	GO:0045581	negative regulation of T cell differentiation	0.010511	1
molecular_function	GO:0050840	extracellular matrix binding	0.0105191	1
biological_process	GO:0045580	regulation of T cell differentiation	0.0105206	1
biological_process	GO:0002699	positive regulation of immune effector process	0.0105246	1
biological_process	GO:0050863	regulation of T cell activation	0.0105314	1
biological_process	GO:0030218	erythrocyte differentiation	0.0105537	1
biological_process	GO:0034968	histone lysine methylation	0.0105537	1
molecular_function	GO:0016817	hydrolase activity, acting on acid anhydrides	0.0105569	1
molecular_function	GO:0016818	hydrolase activity, acting on acid anhydrides, in phosphorus-containing anhydrides	0.0105569	1
biological_process	GO:0061458	reproductive system development	0.0105947	1
biological_process	GO:0046488	phosphatidylinositol metabolic process	0.0106435	1
cellular_component	GO:0030426	growth cone	0.0106992	1
molecular_function	GO:0005048	signal sequence binding	0.0108167	1
biological_process	GO:0045780	positive regulation of bone resorption	0.0109012	1
biological_process	GO:0046852	positive regulation of bone remodeling	0.0109012	1
biological_process	GO:0071371	cellular response to gonadotropin stimulus	0.0109012	1
biological_process	GO:1904872	regulation of telomerase RNA localization to Cajal body	0.0109012	1
biological_process	GO:0048608	reproductive structure development	0.0109117	1
biological_process	GO:0060071	Wnt signaling pathway, planar cell polarity pathway	0.0109177	1
molecular_function	GO:0004721	phosphoprotein phosphatase activity	0.010921	1
biological_process	GO:0002279	mast cell activation involved in immune response	0.0109375	1
biological_process	GO:0002711	positive regulation of T cell mediated immunity	0.0109375	1
biological_process	GO:0033674	positive regulation of kinase activity	0.011088	1
biological_process	GO:1902750	negative regulation of cell cycle G2/M phase transition	0.0110925	1
biological_process	GO:1902749	regulation of cell cycle G2/M phase transition	0.0111477	1
biological_process	GO:2000045	regulation of G1/S transition of mitotic cell cycle	0.0111992	1
cellular_component	GO:0008021	synaptic vesicle	0.0112457	1
cellular_component	GO:0018995	host cellular component	0.0112858	1
cellular_component	GO:0043657	host cell	0.0112858	1
biological_process	GO:0048260	positive regulation of receptor-mediated endocytosis	0.0112919	1
molecular_function	GO:0033549	MAP kinase phosphatase activity	0.0113069	1
molecular_function	GO:0042809	vitamin D receptor binding	0.0113069	1
cellular_component	GO:0005657	replication fork	0.0113975	1
biological_process	GO:0009611	response to wounding	0.0114063	1
biological_process	GO:0072527	pyrimidine-containing compound metabolic process	0.0114227	1
cellular_component	GO:0098589	membrane region	0.0114463	1
biological_process	GO:0007163	establishment or maintenance of cell polarity	0.0114727	1
biological_process	GO:0009612	response to mechanical stimulus	0.0114727	1
cellular_component	GO:0019774	proteasome core complex, beta-subunit complex	0.0114839	1
cellular_component	GO:1904724	tertiary granule lumen	0.0114886	1
biological_process	GO:0052548	regulation of endopeptidase activity	0.011575	1
biological_process	GO:0002763	positive regulation of myeloid leukocyte differentiation	0.0115809	1
biological_process	GO:0061005	cell differentiation involved in kidney development	0.0115809	1
biological_process	GO:0003007	heart morphogenesis	0.0116211	1
biological_process	GO:0033273	response to vitamin	0.0117181	1
biological_process	GO:0090066	regulation of anatomical structure size	0.0117197	1
biological_process	GO:0051101	regulation of DNA binding	0.0117352	1
biological_process	GO:0048872	homeostasis of number of cells	0.0117399	1
biological_process	GO:0042692	muscle cell differentiation	0.0117603	1
biological_process	GO:0002064	epithelial cell development	0.0118071	1
biological_process	GO:0051055	negative regulation of lipid biosynthetic process	0.0118108	1
biological_process	GO:0010950	positive regulation of endopeptidase activity	0.0118297	1
biological_process	GO:0031058	positive regulation of histone modification	0.011849	1
biological_process	GO:1900120	regulation of receptor binding	0.0119021	1
biological_process	GO:1900739	regulation of protein insertion into mitochondrial membrane involved in apoptotic signaling pathway	0.0119021	1
biological_process	GO:1900740	positive regulation of protein insertion into mitochondrial membrane involved in apoptotic signaling pathway	0.0119021	1
molecular_function	GO:0032549	ribonucleoside binding	0.0119394	1
biological_process	GO:0043966	histone H3 acetylation	0.0119878	1
biological_process	GO:0046794	transport of virus	0.0119878	1
cellular_component	GO:0045121	membrane raft	0.0120186	1
biological_process	GO:0006368	transcription elongation from RNA polymerase II promoter	0.0120681	1
biological_process	GO:0042307	positive regulation of protein import into nucleus	0.0120934	1
biological_process	GO:2000142	regulation of DNA-templated transcription, initiation	0.0120934	1
biological_process	GO:0006879	cellular iron ion homeostasis	0.0121173	1
biological_process	GO:0090181	regulation of cholesterol metabolic process	0.0121173	1
biological_process	GO:0033044	regulation of chromosome organization	0.0121243	1
molecular_function	GO:0032550	purine ribonucleoside binding	0.0121545	1
biological_process	GO:0046474	glycerophospholipid biosynthetic process	0.012192	1
biological_process	GO:1902108	regulation of mitochondrial membrane permeability involved in apoptotic process	0.0122044	1
molecular_function	GO:0001091	RNA polymerase II general transcription initiation factor binding	0.0122315	1
molecular_function	GO:0003746	translation elongation factor activity	0.0122315	1
[truncated: 20,752 more rows]
