# Supplementary material for: Rapid Identification of Druggable Targets and the Power of the PHENotype SIMulator for Effective Drug Repurposing in COVID-19
Source: Research Square preprint supplement (doi:10.21203/rs.3.rs-287183/v1), 2021-04-14
Supplement: Supplementary file 11 [file A549_MOI_0.2.xlsx]

## Sheet: MITHrIL
Pathway.Id	Pathway.Name	Impact.Factor	Probability.Pi	Probability.Network	Corrected.Accumulator	pValue	Adjusted.pValue
path:hsa04622	RIG-I-like receptor signaling pathway	10.1196	0.000223182	0.00749625	5.90723	1.31842e-05	0.00329604
path:hsa04623	Cytosolic DNA-sensing pathway	8.15756	0.0019627	0.0129935	4.32718	0.000150946	0.0188683
path:hsa04630	JAK-STAT signaling pathway	7.4736	0.0307039	0.001999	9.74366	0.000392605	0.0245378
path:hsa04217	Necroptosis	8.16838	0.00287203	0.0184908	5.74216	0.000303952	0.0245378
path:hsa04621	NOD-like receptor signaling pathway	7.79008	0.00306331	0.0349825	5.90784	0.000642067	0.0321033
path:hsa04060	Cytokine-cytokine receptor interaction	0	1	0.00549725	6.64968	0.00549725	0.19633
path:hsa04620	Toll-like receptor signaling pathway	6.66286	0.0142768	0.0764618	3.47038	0.00524973	0.19633
path:hsa04141	Protein processing in endoplasmic reticulum	4.89381	0.100336	0.0329835	1.84505	0.0137283	0.429011
path:hsa04625	C-type lectin receptor signaling pathway	5.81301	0.019536	0.197401	1.87779	0.0196625	0.498966
path:hsa04610	Complement and coagulation cascades	4.32204	0.100336	0.051974	0.844244	0.0199586	0.498966
path:hsa00480	Glutathione metabolism	4.53727	0.102318	0.0829585	1.1738	0.0302874	0.688349
path:hsa04151	PI3K-Akt signaling pathway	0	1	0.0794603	4.90138	0.0794603	0.699067
path:hsa04650	Natural killer cell mediated cytotoxicity	0	1	0.116942	3.00818	0.116942	0.699067
path:hsa04064	NF-kappa B signaling pathway	4.1968	0.172765	0.0629685	2.24241	0.0401359	0.699067
path:hsa04659	Th17 cell differentiation	6.70612	0.165416	0.146427	2.18376	0.0761562	0.699067
path:hsa04024	cAMP signaling pathway	0	1	0.107446	-1.98978	0.107446	0.699067
path:hsa04920	Adipocytokine signaling pathway	0	1	0.077961	1.77427	0.077961	0.699067
path:hsa04921	Oxytocin signaling pathway	0	1	0.097951	-1.66896	0.097951	0.699067
path:hsa04713	Circadian entrainment	0	1	0.0549725	-1.44044	0.0549725	0.699067
path:hsa04380	Osteoclast differentiation	5.86226	0.0284803	0.268866	1.27971	0.03739	0.699067
path:hsa04728	Dopaminergic synapse	0	1	0.131434	-1.09104	0.131434	0.699067
path:hsa04928	Parathyroid hormone synthesis, secretion and action	0	1	0.128436	-1.07985	0.128436	0.699067
path:hsa04658	Th1 and Th2 cell differentiation	5.67123	0.163569	0.285357	0.986556	0.137017	0.699067
path:hsa04144	Endocytosis	0	1	0.103948	0.8795	0.103948	0.699067
path:hsa04061	Viral protein interaction with cytokine and cytokine receptor	0	1	0.118941	0.800359	0.118941	0.699067
path:hsa03013	RNA transport	0	1	0.0654673	0.391287	0.0654673	0.699067
path:hsa00330	Arginine and proline metabolism	3.72666	0.0923626	0.2009	0.317116	0.0629199	0.699067
path:hsa00430	Taurine and hypotaurine metabolism	0	1	0.041979	0.204635	0.041979	0.699067
path:hsa00120	Primary bile acid biosynthesis	0	1	0.093953	0.202232	0.093953	0.699067
path:hsa00770	Pantothenate and CoA biosynthesis	0	1	0.125437	0.202132	0.125437	0.699067
path:hsa00730	Thiamine metabolism	0	1	0.057971	0.201034	0.057971	0.699067
path:hsa00010	Glycolysis / Gluconeogenesis	0	1	0.111944	-0.0545398	0.111944	0.699067
path:hsa00670	One carbon pool by folate	0	1	0.103948	0.0365507	0.103948	0.699067
path:hsa00983	Drug metabolism - other enzymes	0	1	0.129435	-0.0239598	0.129435	0.699067
path:hsa00591	Linoleic acid metabolism	0	1	0.110445	-0.0189301	0.110445	0.699067
path:hsa00450	Selenocompound metabolism	0	1	0.122939	0.016864	0.122939	0.699067
path:hsa00052	Galactose metabolism	0	1	0.112944	-0.0147857	0.112944	0.699067
path:hsa00051	Fructose and mannose metabolism	0	1	0.0814593	-0.012764	0.0814593	0.699067
path:hsa04330	Notch signaling pathway	3.33154	0.106271	0.350825	0.0112388	0.124584	0.699067
path:hsa00040	Pentose and glucuronate interconversions	0	1	0.0684658	-0.00872148	0.0684658	0.699067
path:hsa00410	beta-Alanine metabolism	0	1	0.102449	-0.00775696	0.102449	0.699067
path:hsa00520	Amino sugar and nucleotide sugar metabolism	0	1	0.106447	-0.00740457	0.106447	0.699067
path:hsa00500	Starch and sucrose metabolism	0	1	0.129935	-0.0070161	0.129935	0.699067
path:hsa00524	Neomycin, kanamycin and gentamicin biosynthesis	0	1	0.128436	-0.00566021	0.128436	0.699067
path:hsa00515	Mannose type O-glycan biosynthesis	0	1	0.087956	-0.00200129	0.087956	0.699067
path:hsa04977	Vitamin digestion and absorption	0	1	0.127936	-0.00103286	0.127936	0.699067
path:hsa00601	Glycosphingolipid biosynthesis - lacto and neolacto series	0	1	0.136932	-0.000431169	0.136932	0.699067
path:hsa00472	D-Arginine and D-ornithine metabolism	0	1	0.0804598	2.96276e-05	0.0804598	0.699067
path:hsa00232	Caffeine metabolism	0	1	0.123438	-2.26499e-05	0.123438	0.699067
path:hsa00230	Purine metabolism	0	1	0.141929	-0.110013	0.141929	0.709645
path:hsa04611	Platelet activation	0	1	0.153923	-1.59454	0.153923	0.71516
path:hsa04917	Prolactin signaling pathway	5.76012	0.12771	0.374313	0.63309	0.151323	0.71516
path:hsa00860	Porphyrin and chlorophyll metabolism	0	1	0.162919	0.224727	0.162919	0.71516
path:hsa00400	Phenylalanine, tyrosine and tryptophan biosynthesis	0	1	0.157421	0.0235577	0.157421	0.71516
path:hsa00240	Pyrimidine metabolism	0	1	0.164918	-0.00838384	0.164918	0.71516
path:hsa00750	Vitamin B6 metabolism	0	1	0.161919	0.00526833	0.161919	0.71516
path:hsa00130	Ubiquinone and other terpenoid-quinone biosynthesis	0	1	0.165917	0.00327665	0.165917	0.71516
path:hsa00100	Steroid biosynthesis	0	1	0.164918	-0.0026961	0.164918	0.71516
path:hsa04670	Leukocyte transendothelial migration	0	1	0.170915	-0.929808	0.170915	0.724214
path:hsa00512	Mucin type O-glycan biosynthesis	0	1	0.174413	-0.00237364	0.174413	0.72672
path:hsa04672	Intestinal immune network for IgA production	0	1	0.182409	0.135234	0.182409	0.747577
path:hsa04210	Apoptosis	0	1	0.229885	1.42922	0.229885	0.748733
path:hsa04668	TNF signaling pathway	0	1	0.245377	1.19027	0.245377	0.748733
path:hsa04550	Signaling pathways regulating pluripotency of stem cells	0	1	0.272364	1.10854	0.272364	0.748733
path:hsa04066	HIF-1 signaling pathway	0	1	0.28036	0.900401	0.28036	0.748733
path:hsa04140	Autophagy - animal	0	1	0.330835	0.887882	0.330835	0.748733
path:hsa00970	Aminoacyl-tRNA biosynthesis	0	1	0.2004	0.730183	0.2004	0.748733
path:hsa01230	Biosynthesis of amino acids	0	1	0.296352	0.572111	0.296352	0.748733
path:hsa04068	FoxO signaling pathway	0	1	0.384308	0.513904	0.384308	0.748733
path:hsa04137	Mitophagy - animal	0	1	0.295852	0.509518	0.295852	0.748733
path:hsa04720	Long-term potentiation	0	1	0.204398	-0.489119	0.204398	0.748733
path:hsa04071	Sphingolipid signaling pathway	0	1	0.416292	0.462739	0.416292	0.748733
path:hsa04722	Neurotrophin signaling pathway	0	1	0.413793	0.462678	0.413793	0.748733
path:hsa04211	Longevity regulating pathway	0	1	0.370315	0.459275	0.370315	0.748733
path:hsa04530	Tight junction	0	1	0.22089	-0.443024	0.22089	0.748733
path:hsa04012	ErbB signaling pathway	0	1	0.416792	0.427197	0.416792	0.748733
path:hsa00260	Glycine, serine and threonine metabolism	0	1	0.188406	0.414913	0.188406	0.748733
path:hsa04218	Cellular senescence	0	1	0.3993	0.412036	0.3993	0.748733
path:hsa04960	Aldosterone-regulated sodium reabsorption	0	1	0.285357	0.374917	0.285357	0.748733
path:hsa04918	Thyroid hormone synthesis	0	1	0.31934	0.358412	0.31934	0.748733
path:hsa04935	Growth hormone synthesis, secretion and action	5.37824	0.203303	0.548226	-0.343185	0.308141	0.748733
path:hsa04150	mTOR signaling pathway	0	1	0.41929	0.334453	0.41929	0.748733
path:hsa04927	Cortisol synthesis and secretion	0	1	0.377811	0.327839	0.377811	0.748733
path:hsa04080	Neuroactive ligand-receptor interaction	0	1	0.350325	0.310134	0.350325	0.748733
path:hsa04922	Glucagon signaling pathway	0	1	0.402799	0.267445	0.402799	0.748733
path:hsa04911	Insulin secretion	0	1	0.401299	0.255097	0.401299	0.748733
path:hsa04925	Aldosterone synthesis and secretion	0	1	0.401799	0.244294	0.401799	0.748733
path:hsa04973	Carbohydrate digestion and absorption	0	1	0.375312	0.236778	0.375312	0.748733
path:hsa04213	Longevity regulating pathway - multiple species	0	1	0.402799	0.223689	0.402799	0.748733
path:hsa00270	Cysteine and methionine metabolism	0	1	0.211394	0.21614	0.211394	0.748733
path:hsa00630	Glyoxylate and dicarboxylate metabolism	0	1	0.283358	0.198239	0.283358	0.748733
path:hsa04114	Oocyte meiosis	2.67646	0.210328	0.604698	-0.114212	0.351354	0.748733
path:hsa04392	Hippo signaling pathway - multiple species	0	1	0.202399	0.0691688	0.202399	0.748733
path:hsa04727	GABAergic synapse	0	1	0.212394	-0.0688496	0.212394	0.748733
path:hsa04657	IL-17 signaling pathway	0	1	0.265867	-0.0680586	0.265867	0.748733
path:hsa04913	Ovarian steroidogenesis	0	1	0.237881	-0.0630154	0.237881	0.748733
path:hsa00140	Steroid hormone biosynthesis	0	1	0.35932	0.0410497	0.35932	0.748733
path:hsa04390	Hippo signaling pathway	0	1	0.416792	0.0395946	0.416792	0.748733
path:hsa04512	ECM-receptor interaction	0	1	0.234383	-0.0345512	0.234383	0.748733
path:hsa04216	Ferroptosis	0	1	0.237381	-0.0318842	0.237381	0.748733
path:hsa04215	Apoptosis - multiple species	0	1	0.389305	0.0313804	0.389305	0.748733
path:hsa04976	Bile secretion	0	1	0.201399	-0.0305816	0.201399	0.748733
path:hsa04062	Chemokine signaling pathway	4.73305	0.291644	0.497251	0.0296786	0.34724	0.748733
path:hsa04612	Antigen processing and presentation	0	1	0.241879	-0.0278269	0.241879	0.748733
path:hsa04340	Hedgehog signaling pathway	0	1	0.383808	-0.0253998	0.383808	0.748733
path:hsa00310	Lysine degradation	0	1	0.409295	0.0215283	0.409295	0.748733
path:hsa04962	Vasopressin-regulated water reabsorption	0	1	0.23988	-0.0214855	0.23988	0.748733
path:hsa04919	Thyroid hormone signaling pathway	3.43822	0.208577	0.494753	0.0207665	0.279938	0.748733
path:hsa00600	Sphingolipid metabolism	0	1	0.356322	0.0205174	0.356322	0.748733
path:hsa00830	Retinol metabolism	0	1	0.358321	0.0201111	0.358321	0.748733
path:hsa00790	Folate biosynthesis	0	1	0.349825	0.0200472	0.349825	0.748733
path:hsa00360	Phenylalanine metabolism	0	1	0.252374	0.0183367	0.252374	0.748733
path:hsa00220	Arginine biosynthesis	0	1	0.377311	0.0177888	0.377311	0.748733
path:hsa01210	2-Oxocarboxylic acid metabolism	0	1	0.278861	0.0172938	0.278861	0.748733
path:hsa04514	Cell adhesion molecules (CAMs)	0	1	0.416292	0.0169852	0.416292	0.748733
path:hsa04260	Cardiac muscle contraction	0	1	0.387306	0.0161846	0.387306	0.748733
path:hsa03015	mRNA surveillance pathway	0	1	0.244878	0.0155371	0.244878	0.748733
path:hsa01212	Fatty acid metabolism	0	1	0.396802	0.0145402	0.396802	0.748733
path:hsa00760	Nicotinate and nicotinamide metabolism	0	1	0.275362	-0.0115436	0.275362	0.748733
path:hsa04115	p53 signaling pathway	0	1	0.402799	-0.00974007	0.402799	0.748733
path:hsa00620	Pyruvate metabolism	0	1	0.274863	-0.00685347	0.274863	0.748733
path:hsa04710	Circadian rhythm	0	1	0.412294	0.0061017	0.412294	0.748733
path:hsa03018	RNA degradation	0	1	0.229385	-0.00505946	0.229385	0.748733
path:hsa00471	D-Glutamine and D-glutamate metabolism	0	1	0.306847	0.00376258	0.306847	0.748733
path:hsa03460	Fanconi anemia pathway	0	1	0.310345	0.00368702	0.310345	0.748733
path:hsa00340	Histidine metabolism	0	1	0.218391	-0.00350254	0.218391	0.748733
path:hsa04964	Proximal tubule bicarbonate reclamation	0	1	0.305347	0.00337247	0.305347	0.748733
path:hsa00910	Nitrogen metabolism	0	1	0.354823	0.00314632	0.354823	0.748733
path:hsa00020	Citrate cycle (TCA cycle)	0	1	0.217891	-0.0031367	0.217891	0.748733
path:hsa03440	Homologous recombination	0	1	0.392804	-0.00184125	0.392804	0.748733
path:hsa04979	Cholesterol metabolism	0	1	0.331334	0.00165043	0.331334	0.748733
path:hsa00900	Terpenoid backbone biosynthesis	0	1	0.255372	-0.00100294	0.255372	0.748733
path:hsa00604	Glycosphingolipid biosynthesis - ganglio series	0	1	0.326837	-0.000792348	0.326837	0.748733
path:hsa04614	Renin-angiotensin system	0	1	0.376312	-0.000662643	0.376312	0.748733
path:hsa00510	N-Glycan biosynthesis	0	1	0.312844	0.00036029	0.312844	0.748733
path:hsa04130	SNARE interactions in vesicular transport	0	1	0.295352	-9.21255e-05	0.295352	0.748733
path:hsa00740	Riboflavin metabolism	0	1	0.192404	-3.82168e-05	0.192404	0.748733
path:hsa04145	Phagosome	0	1	0.356822	-2.81359e-05	0.356822	0.748733
path:hsa00513	Various types of N-glycan biosynthesis	0	1	0.381309	-2.46368e-05	0.381309	0.748733
path:hsa00290	Valine, leucine and isoleucine biosynthesis	0	1	0.354323	3.50171e-07	0.354323	0.748733
path:hsa04152	AMPK signaling pathway	0	1	0.431284	0.182615	0.431284	0.753994
path:hsa04978	Mineral absorption	0	1	0.427286	0.0291852	0.427286	0.753994
path:hsa00350	Tyrosine metabolism	0	1	0.429285	0.0130439	0.429285	0.753994
path:hsa00980	Metabolism of xenobiotics by cytochrome P450	0	1	0.436282	0.00932461	0.436282	0.757434
path:hsa00982	Drug metabolism - cytochrome P450	0	1	0.44078	0.0122546	0.44078	0.759965
path:hsa00380	Tryptophan metabolism	0	1	0.448276	0.0106444	0.448276	0.763224
path:hsa00062	Fatty acid elongation	0	1	0.448776	0.00321023	0.448776	0.763224
path:hsa04910	Insulin signaling pathway	0	1	0.452274	0.229217	0.452274	0.763976
path:hsa00250	Alanine, aspartate and glutamate metabolism	0	1	0.45977	0.0105505	0.45977	0.766284
path:hsa00071	Fatty acid degradation	0	1	0.45977	0.00668254	0.45977	0.766284
path:hsa01200	Carbon metabolism	0	1	0.473763	0.0663276	0.473763	0.774123
path:hsa00061	Fatty acid biosynthesis	0	1	0.472264	0.00115736	0.472264	0.774123
path:hsa00650	Butanoate metabolism	0	1	0.471764	0.000691784	0.471764	0.774123
path:hsa04664	Fc epsilon RI signaling pathway	0	1	0.478761	0.101295	0.478761	0.774294
path:hsa04020	Calcium signaling pathway	0	1	0.486257	0.0283735	0.486257	0.774294
path:hsa01040	Biosynthesis of unsaturated fatty acids	0	1	0.482259	0.000811364	0.482259	0.774294
path:hsa04721	Synaptic vesicle cycle	0	1	0.486257	0.000396063	0.486257	0.774294
path:hsa04810	Regulation of actin cytoskeleton	0	1	0.512744	-0.098152	0.512744	0.775062
path:hsa04912	GnRH signaling pathway	0	1	0.512744	-0.0872744	0.512744	0.775062
path:hsa04022	cGMP-PKG signaling pathway	0	1	0.517741	-0.0869671	0.517741	0.775062
path:hsa04072	Phospholipase D signaling pathway	0	1	0.493753	0.0516955	0.493753	0.775062
path:hsa04070	Phosphatidylinositol signaling system	0	1	0.514743	-0.0453291	0.514743	0.775062
path:hsa04261	Adrenergic signaling in cardiomyocytes	0	1	0.511744	-0.0420886	0.511744	0.775062
path:hsa04923	Regulation of lipolysis in adipocytes	0	1	0.496252	0.00844948	0.496252	0.775062
path:hsa04914	Progesterone-mediated oocyte maturation	0	1	0.503248	-0.00773648	0.503248	0.775062
path:hsa04110	Cell cycle	0	1	0.507746	-0.00115282	0.507746	0.775062
path:hsa04370	VEGF signaling pathway	0	1	0.527736	-0.126087	0.527736	0.776083
path:hsa04350	TGF-beta signaling pathway	0	1	0.527236	-0.012035	0.527236	0.776083
path:hsa03320	PPAR signaling pathway	0	1	0.524738	-0.0058503	0.524738	0.776083
path:hsa00280	Valine, leucine and isoleucine degradation	0	1	0.532234	-0.0022847	0.532234	0.77812
path:hsa00190	Oxidative phosphorylation	0	1	0.543728	-2.82184e-05	0.543728	0.790303
path:hsa04520	Adherens junction	0	1	0.549225	-0.093038	0.549225	0.793678
path:hsa04015	Rap1 signaling pathway	4.94482	0.335874	0.742629	-1.6629	0.563963	0.79639
path:hsa04010	MAPK signaling pathway	0	1	0.556722	-0.351121	0.556722	0.79639
path:hsa04666	Fc gamma R-mediated phagocytosis	0	1	0.564718	-0.252184	0.564718	0.79639
path:hsa04750	Inflammatory mediator regulation of TRP channels	0	1	0.570215	-0.240025	0.570215	0.79639
path:hsa00562	Inositol phosphate metabolism	0	1	0.561719	-0.150684	0.561719	0.79639
path:hsa04136	Autophagy - other	0	1	0.567216	-0.0105265	0.567216	0.79639
path:hsa04014	Ras signaling pathway	0	1	0.583708	-0.488115	0.583708	0.797415
path:hsa04360	Axon guidance	0	1	0.58021	-0.36399	0.58021	0.797415
path:hsa04540	Gap junction	0	1	0.582209	-0.286932	0.582209	0.797415
path:hsa04740	Olfactory transduction	0	1	0.577711	-0.0114112	0.577711	0.797415
path:hsa04961	Endocrine and other factor-regulated calcium reabsorption	0	1	0.591704	-0.142498	0.591704	0.797729
path:hsa00564	Glycerophospholipid metabolism	0	1	0.596702	-0.0557117	0.596702	0.797729
path:hsa00640	Propanoate metabolism	0	1	0.587706	-0.00137673	0.587706	0.797729
path:hsa00920	Sulfur metabolism	0	1	0.596702	-0.00062605	0.596702	0.797729
path:hsa04926	Relaxin signaling pathway	0	1	0.637181	-0.806536	0.637181	0.81022
path:hsa04510	Focal adhesion	0	1	0.627686	-0.68345	0.627686	0.81022
path:hsa04660	T cell receptor signaling pathway	0	1	0.648176	-0.60955	0.648176	0.81022
path:hsa04662	B cell receptor signaling pathway	0	1	0.633683	-0.458789	0.633683	0.81022
path:hsa04916	Melanogenesis	0	1	0.634183	-0.381513	0.634183	0.81022
path:hsa04714	Thermogenesis	0	1	0.617191	-0.250543	0.617191	0.81022
path:hsa04310	Wnt signaling pathway	0	1	0.613693	-0.233228	0.613693	0.81022
path:hsa04970	Salivary secretion	0	1	0.647676	-0.138746	0.647676	0.81022
path:hsa04972	Pancreatic secretion	0	1	0.642679	-0.102129	0.642679	0.81022
path:hsa00590	Arachidonic acid metabolism	0	1	0.615692	-0.0234454	0.615692	0.81022
path:hsa04744	Phototransduction	0	1	0.648176	-0.0163133	0.648176	0.81022
path:hsa04975	Fat digestion and absorption	0	1	0.631684	-0.00362943	0.631684	0.81022
path:hsa00030	Pentose phosphate pathway	0	1	0.622689	-0.00266938	0.622689	0.81022
path:hsa04725	Cholinergic synapse	0	1	0.655672	-0.713968	0.655672	0.811475
path:hsa00440	Phosphonate and phosphinate metabolism	0	1	0.655672	-0.000205848	0.655672	0.811475
path:hsa00563	Glycosylphosphatidylinositol (GPI)-anchor biosynthesis	0	1	0.672164	-0.0130312	0.672164	0.827788
path:hsa04371	Apelin signaling pathway	0	1	0.681159	-0.65506	0.681159	0.830682
path:hsa04726	Serotonergic synapse	0	1	0.681159	-0.417292	0.681159	0.830682
path:hsa04270	Vascular smooth muscle contraction	0	1	0.685157	-0.378253	0.685157	0.831502
path:hsa04915	Estrogen signaling pathway	0	1	0.688656	-0.959382	0.688656	0.83171
path:hsa04730	Long-term depression	0	1	0.693153	-0.544718	0.693153	0.833117
path:hsa04723	Retrograde endocannabinoid signaling	0	1	0.702149	-0.448191	0.702149	0.836487
path:hsa00592	alpha-Linolenic acid metabolism	0	1	0.702649	-0.0127549	0.702649	0.836487
path:hsa04971	Gastric acid secretion	0	1	0.712644	-0.325299	0.712644	0.844365
path:hsa00785	Lipoic acid metabolism	0	1	0.717641	-7.19586e-08	0.717641	0.846275
path:hsa04924	Renin secretion	0	1	0.735632	-0.345285	0.735632	0.859383
path:hsa00565	Ether lipid metabolism	0	1	0.734633	-0.0174402	0.734633	0.859383
path:hsa04724	Glutamatergic synapse	0	1	0.744128	-0.494185	0.744128	0.861259
path:hsa04742	Taste transduction	0	1	0.742129	-0.143325	0.742129	0.861259
path:hsa00780	Biotin metabolism	0	1	0.750125	-2.35412e-07	0.750125	0.864199
path:hsa00072	Synthesis and degradation of ketone bodies	0	1	0.763118	-1.00623e-06	0.763118	0.875136
path:hsa00053	Ascorbate and aldarate metabolism	0	1	0.774113	-0.00699686	0.774113	0.883691
remaining	remaining	1.22577	0.797904	1	0	0.797904	0.906709
path:hsa00561	Glycerolipid metabolism	0	1	0.814093	-0.0399532	0.814093	0.92092
path:hsa01100	Metabolic pathways	3.23947	0.924258	0.895552	-6.54546	0.971464	1
path:hsa02010	ABC transporters	0	1	1	0	1	1
path:hsa00514	Other types of O-glycan biosynthesis	0	1	1	0	1	1
path:hsa00511	Other glycan degradation	0	1	1	0	1	1
path:hsa03450	Non-homologous end-joining	0	1	1	0	1	1
path:hsa03420	Nucleotide excision repair	0	1	1	0	1	1
path:hsa04640	Hematopoietic cell lineage	0	1	1	0	1	1
path:hsa03430	Mismatch repair	0	1	1	0	1	1
path:hsa00603	Glycosphingolipid biosynthesis - globo and isoglobo series	0	1	1	0	1	1
path:hsa04974	Protein digestion and absorption	0	1	1	0	1	1
path:hsa03410	Base excision repair	0	1	1	0	1	1
path:hsa03060	Protein export	0	1	1	0	1	1
path:hsa04966	Collecting duct acid secretion	0	1	1	0	1	1
path:hsa03040	Spliceosome	0	1	1	0	1	1
path:hsa03050	Proteasome	0	1	1	0	1	1
path:hsa04146	Peroxisome	0	1	1	0	1	1
path:hsa04142	Lysosome	0	1	1	0	1	1
path:hsa03020	RNA polymerase	0	1	1	0	1	1
path:hsa03022	Basal transcription factors	0	1	1	0	1	1
path:hsa04122	Sulfur relay system	0	1	1	0	1	1
path:hsa03030	DNA replication	0	1	1	0	1	1
path:hsa04120	Ubiquitin mediated proteolysis	0	1	1	0	1	1
path:hsa04929	GnRH secretion	0	1	1	0	1	1
path:hsa00531	Glycosaminoglycan degradation	0	1	1	0	1	1
path:hsa00532	Glycosaminoglycan biosynthesis - chondroitin sulfate / dermatan sulfate	0	1	1	0	1	1
path:hsa00533	Glycosaminoglycan biosynthesis - keratan sulfate	0	1	1	0	1	1
path:hsa00534	Glycosaminoglycan biosynthesis - heparan sulfate / heparin	0	1	1	0	1	1
path:hsa03008	Ribosome biogenesis in eukaryotes	0	1	1	0	1	1
path:hsa03010	Ribosome	0	1	1	0	1	1

## Sheet: SPIA
Name	ID	pSize	NDE	pNDE	tA	pPERT	pG	pGFdr	pGFWER	Status
Herpes simplex infection	05168	161	10	1.23965e-12	7.19765	0.412	1.4966e-11	3.18314e-10	3.89116e-10	Activated
Hepatitis C	05160	114	9	2.15838e-12	-4.5052	0.394	2.44857e-11	3.18314e-10	6.36628e-10	Inhibited
Measles	05162	116	9	2.53111e-12	-0.237475	0.973	6.8292e-11	5.91864e-10	1.77559e-09	Inhibited
Influenza A	05164	151	9	2.78078e-11	8.16591	0.243	1.80558e-10	1.17363e-09	4.6945e-09	Activated
RIG-I-like receptor signaling pathway	04622	55	3	0.000235703	0.375062	0.902	0.0020104	0.0104541	0.0522704	Activated
Viral carcinogenesis	05203	189	4	0.000753763	0	1	0.00617364	0.025962	0.160515	Inhibited
Cytosolic DNA-sensing pathway	04623	49	2	0.00516916	3.50671	0.168	0.00698976	0.025962	0.181734	Activated
Osteoclast differentiation	04380	127	2	0.0316122	-7.43682	0.056	0.0129879	0.0422106	0.337685	Inhibited
Jak-STAT signaling pathway	04630	121	2	0.0289195	0.597635	0.224	0.0391228	0.113021	1	Activated
Toll-like receptor signaling pathway	04620	87	2	0.0156093	2.38459	0.6	0.0531094	0.138084	1	Activated
Epstein-Barr virus infection	05169	193	2	0.0669495	3.50671	0.208	0.0734436	0.173594	1	Activated
Protein processing in endoplasmic reticulum	04141	155	1	0.290069	2.44008	0.09	0.121279	0.249874	1	Activated
Systemic lupus erythematosus	05322	106	1	0.208577	1.72526	0.13	0.124937	0.249874	1	Activated
Staphylococcus aureus infection	05150	48	1	0.100336	3.01921	0.338	0.148675	0.27611	1	Activated
NF-kappa B signaling pathway	04064	85	1	0.170934	5.00071	0.269	0.187581	0.325141	1	Activated
Complement and coagulation cascades	04610	58	1	0.119972	3.66618	0.495	0.227075	0.368996	1	Activated
Notch signaling pathway	04330	45	1	0.0943623	-1.46158	0.942	0.304034	0.448955	1	Inhibited
Pertussis	05133	69	1	0.141091	1.72526	0.65	0.310815	0.448955	1	Activated
Toxoplasmosis	05145	121	1	0.234443	1.3148	0.441	0.338006	0.462535	1	Activated
Pancreatic cancer	05212	69	1	0.141091	1.3148	0.842	0.371879	0.483443	1	Activated
Leishmaniasis	05140	68	1	0.139192	0	1	0.413665	0.510543	1	Inhibited
B cell receptor signaling pathway	04662	73	1	0.148648	0	1	0.431998	0.510543	1	Inhibited
Tuberculosis	05152	162	1	0.301024	2.6296	0.621	0.500425	0.539396	1	Activated
Chemokine signaling pathway	04062	160	1	0.297911	-2.27273	0.64	0.506639	0.539396	1	Inhibited
Oocyte meiosis	04114	100	1	0.197995	0	1	0.51865	0.539396	1	Inhibited
Pathways in cancer	05200	296	1	0.481685	0.578885	0.861	0.779746	0.779746	1	Activated

## Sheet: Reactome
ID	Description	setSize	enrichmentScore	NES	pvalue	p.adjust	qvalues
R-HSA-909733	Interferon alpha/beta signaling	15	0.744051	1.79629	0.00322928	0.0129171	0.00339924
R-HSA-1280215	Cytokine Signaling in Immune system	19	0.653196	1.57427	0.0267666	0.0356888	0.00939179
R-HSA-913531	Interferon Signaling	19	0.653196	1.57427	0.0267666	0.0356888	0.00939179
R-HSA-168256	Immune System	23	0.576105	1.35989	0.124597	0.124597	0.0327887

## Sheet: GO
ontology	node_id	node_name	raw_p_overrep	FWER_overrep
biological_process	GO:0051607	defense response to virus	6.79276e-30	0
biological_process	GO:0009615	response to virus	3.93692e-29	0
biological_process	GO:0060337	type I interferon signaling pathway	1.09375e-28	0
biological_process	GO:0071357	cellular response to type I interferon	1.09375e-28	0
biological_process	GO:0034340	response to type I interferon	2.23239e-28	0
biological_process	GO:0045087	innate immune response	6.79299e-26	0
biological_process	GO:0051707	response to other organism	3.731e-24	0
biological_process	GO:0043207	response to external biotic stimulus	3.86905e-24	0
biological_process	GO:0009607	response to biotic stimulus	6.75121e-24	0
biological_process	GO:0098542	defense response to other organism	8.32046e-24	0
biological_process	GO:0044419	interspecies interaction between organisms	2.51981e-23	0
biological_process	GO:0048525	negative regulation of viral process	1.58973e-19	0
biological_process	GO:0006952	defense response	1.82267e-19	0
biological_process	GO:0009605	response to external stimulus	4.68245e-18	0
biological_process	GO:0045071	negative regulation of viral genome replication	5.49918e-18	0
biological_process	GO:0006955	immune response	5.50202e-18	0
biological_process	GO:0045069	regulation of viral genome replication	8.46461e-18	0
biological_process	GO:0050792	regulation of viral process	2.10927e-17	0
biological_process	GO:0043903	regulation of symbiosis, encompassing mutualism through parasitism	4.96786e-17	0
biological_process	GO:0002252	immune effector process	9.82836e-17	0
biological_process	GO:0019079	viral genome replication	1.4753e-16	0
biological_process	GO:1903901	negative regulation of viral life cycle	2.65661e-16	0
biological_process	GO:0034097	response to cytokine	8.67527e-16	0
biological_process	GO:1903900	regulation of viral life cycle	1.40634e-15	0
biological_process	GO:0002376	immune system process	2.00828e-15	0
biological_process	GO:0019221	cytokine-mediated signaling pathway	5.29138e-15	0
biological_process	GO:0016032	viral process	1.03011e-14	0
biological_process	GO:0044403	symbiotic process	2.49181e-14	0
biological_process	GO:0006950	response to stress	1.12556e-12	0
biological_process	GO:0071345	cellular response to cytokine stimulus	1.28572e-12	0
biological_process	GO:0060333	interferon-gamma-mediated signaling pathway	3.80774e-12	0
biological_process	GO:0019058	viral life cycle	8.30868e-12	0
biological_process	GO:0034341	response to interferon-gamma	6.17119e-11	0
biological_process	GO:0071346	cellular response to interferon-gamma	9.36191e-10	0
biological_process	GO:0050688	regulation of defense response to virus	3.57338e-09	0
molecular_function	GO:0003725	double-stranded RNA binding	4.78117e-09	0
molecular_function	GO:0001730	2'-5'-oligoadenylate synthetase activity	5.90845e-09	0
biological_process	GO:0071310	cellular response to organic substance	3.15914e-08	0
biological_process	GO:0010033	response to organic substance	1.13795e-07	0
biological_process	GO:0002230	positive regulation of defense response to virus by host	1.33173e-07	0
biological_process	GO:0035456	response to interferon-beta	1.81921e-07	0
biological_process	GO:0007166	cell surface receptor signaling pathway	1.93001e-07	0
cellular_component	GO:0005829	cytosol	3.60779e-07	0
biological_process	GO:0060700	regulation of ribonuclease activity	4.60057e-07	0
biological_process	GO:0002831	regulation of response to biotic stimulus	4.61437e-07	0
biological_process	GO:0050691	regulation of defense response to virus by host	5.80057e-07	0
biological_process	GO:0070887	cellular response to chemical stimulus	7.48424e-07	0
biological_process	GO:0098586	cellular response to virus	2.51943e-06	0
biological_process	GO:0050896	response to stimulus	2.94435e-06	0
biological_process	GO:0035455	response to interferon-alpha	7.17616e-06	0.02
molecular_function	GO:0003950	NAD+ ADP-ribosyltransferase activity	8.88174e-06	0.02
molecular_function	GO:0070566	adenylyltransferase activity	2.08872e-05	0.02
biological_process	GO:0007165	signal transduction	7.9603e-06	0.03
biological_process	GO:0032069	regulation of nuclease activity	8.29889e-06	0.03
biological_process	GO:0032727	positive regulation of interferon-alpha production	8.29889e-06	0.03
biological_process	GO:0042221	response to chemical	1.09476e-05	0.05
biological_process	GO:0002682	regulation of immune system process	1.22455e-05	0.05
biological_process	GO:0039528	cytoplasmic pattern recognition receptor signaling pathway in response to virus	1.56647e-05	0.05
biological_process	GO:0002697	regulation of immune effector process	1.63709e-05	0.05
biological_process	GO:0032647	regulation of interferon-alpha production	1.75226e-05	0.05
cellular_component	GO:0005737	cytoplasm	0.000493908	0.05
biological_process	GO:0032607	interferon-alpha production	2.1662e-05	0.06
molecular_function	GO:0016763	transferase activity, transferring pentosyl groups	9.05932e-05	0.06
biological_process	GO:0051716	cellular response to stimulus	2.52717e-05	0.07
biological_process	GO:0031347	regulation of defense response	2.83722e-05	0.07
biological_process	GO:0006471	protein ADP-ribosylation	2.90019e-05	0.07
molecular_function	GO:0097677	STAT family protein binding	0.000120417	0.07
biological_process	GO:0023052	signaling	3.73734e-05	0.08
biological_process	GO:0007154	cell communication	4.01053e-05	0.09
cellular_component	GO:0005634	nucleus	0.0011204	0.1
biological_process	GO:0048519	negative regulation of biological process	6.65113e-05	0.15
biological_process	GO:0046719	regulation by virus of viral protein levels in host cell	6.72147e-05	0.15
biological_process	GO:0032479	regulation of type I interferon production	7.84035e-05	0.15
biological_process	GO:0032606	type I interferon production	8.33501e-05	0.15
biological_process	GO:0051252	regulation of RNA metabolic process	0.000115966	0.16
molecular_function	GO:1990404	protein ADP-ribosylase activity	0.000348765	0.17
cellular_component	GO:0043231	intracellular membrane-bounded organelle	0.00170391	0.17
biological_process	GO:0039530	MDA-5 signaling pathway	0.000143539	0.2
biological_process	GO:0060760	positive regulation of response to cytokine stimulus	0.000150959	0.2
molecular_function	GO:0003724	RNA helicase activity	0.000408635	0.2
biological_process	GO:0070213	protein auto-ADP-ribosylation	0.000175236	0.23
biological_process	GO:0002753	cytoplasmic pattern recognition receptor signaling pathway	0.000193912	0.24
molecular_function	GO:0003727	single-stranded RNA binding	0.000727627	0.27
biological_process	GO:0035563	positive regulation of chromatin binding	0.000247949	0.31
biological_process	GO:2001034	positive regulation of double-strand break repair via nonhomologous end joining	0.000247949	0.31
biological_process	GO:0019219	regulation of nucleobase-containing compound metabolic process	0.000270213	0.31
biological_process	GO:0034356	NAD biosynthesis via nicotinamide riboside salvage pathway	0.000288944	0.32
biological_process	GO:0031397	negative regulation of protein ubiquitination	0.00036813	0.39
biological_process	GO:0032481	positive regulation of type I interferon production	0.00036813	0.39
biological_process	GO:0060759	regulation of response to cytokine stimulus	0.000379526	0.39
biological_process	GO:0065009	regulation of molecular function	0.000403735	0.41
biological_process	GO:0032101	regulation of response to external stimulus	0.00041654	0.41
biological_process	GO:0071360	cellular response to exogenous dsRNA	0.000430351	0.43
biological_process	GO:0002684	positive regulation of immune system process	0.000534163	0.45
biological_process	GO:1903321	negative regulation of protein modification by small protein conjugation or removal	0.000544756	0.49
biological_process	GO:0039529	RIG-I signaling pathway	0.00059917	0.51
biological_process	GO:0071359	cellular response to dsRNA	0.000726804	0.56
biological_process	GO:2001032	regulation of double-strand break repair via nonhomologous end joining	0.000726804	0.56
biological_process	GO:0006974	cellular response to DNA damage stimulus	0.000744189	0.56
biological_process	GO:0035561	regulation of chromatin binding	0.000795116	0.58
biological_process	GO:0060330	regulation of response to interferon-gamma	0.000940676	0.64
biological_process	GO:0060334	regulation of interferon-gamma-mediated signaling pathway	0.000940676	0.64
biological_process	GO:0080134	regulation of response to stress	0.000962951	0.65
biological_process	GO:0051090	regulation of DNA-binding transcription factor activity	0.00103677	0.67
biological_process	GO:0002833	positive regulation of response to biotic stimulus	0.00104574	0.69
biological_process	GO:0009435	NAD biosynthetic process	0.00126725	0.72
biological_process	GO:0032728	positive regulation of interferon-beta production	0.00135623	0.72
cellular_component	GO:0043229	intracellular organelle	0.00349128	0.72
biological_process	GO:0001819	positive regulation of cytokine production	0.00142397	0.73
biological_process	GO:0045648	positive regulation of erythrocyte differentiation	0.00144811	0.73
biological_process	GO:2000781	positive regulation of double-strand break repair	0.00144811	0.73
biological_process	GO:0019359	nicotinamide nucleotide biosynthetic process	0.00154289	0.74
biological_process	GO:0019363	pyridine nucleotide biosynthetic process	0.00154289	0.74
biological_process	GO:0019362	pyridine nucleotide metabolic process	0.00164056	0.74
biological_process	GO:0046496	nicotinamide nucleotide metabolic process	0.00164056	0.74
biological_process	GO:0001817	regulation of cytokine production	0.00170807	0.74
cellular_component	GO:0005739	mitochondrion	0.00447959	0.74
biological_process	GO:0051336	regulation of hydrolase activity	0.00179246	0.76
biological_process	GO:0090304	nucleic acid metabolic process	0.00180451	0.76
cellular_component	GO:0005622	intracellular	0.00508716	0.77
molecular_function	GO:0003676	nucleic acid binding	0.00201113	0.91
molecular_function	GO:0016779	nucleotidyltransferase activity	0.00208962	0.91
cellular_component	GO:0043226	organelle	0.00577541	0.91
molecular_function	GO:0003723	RNA binding	0.0021964	0.93
molecular_function	GO:0044389	ubiquitin-like protein ligase binding	0.00247353	0.93
cellular_component	GO:0031981	nuclear lumen	0.00587685	0.93
biological_process	GO:0046725	negative regulation by virus of viral protein levels in host cell	0.0018211	0.94
biological_process	GO:0072308	negative regulation of metanephric nephron tubule epithelial cell differentiation	0.0018211	0.94
biological_process	GO:1903697	negative regulation of microvillus assembly	0.0018211	0.94
biological_process	GO:0072525	pyridine-containing compound biosynthetic process	0.00184452	0.94
biological_process	GO:0050776	regulation of immune response	0.00188744	0.94
biological_process	GO:0006355	regulation of transcription, DNA-templated	0.00204808	0.94
molecular_function	GO:0004386	helicase activity	0.00341761	0.94
cellular_component	GO:0000798	nuclear cohesin complex	0.0068803	0.95
cellular_component	GO:0034991	nuclear meiotic cohesin complex	0.0068803	0.95
cellular_component	GO:0048471	perinuclear region of cytoplasm	0.00702869	0.95
biological_process	GO:0046825	regulation of protein export from nucleus	0.00217189	0.96
biological_process	GO:0006915	apoptotic process	0.00219186	0.96
biological_process	GO:0045088	regulation of innate immune response	0.0022008	0.96
biological_process	GO:0072524	pyridine-containing compound metabolic process	0.00228668	0.96
biological_process	GO:0000209	protein polyubiquitination	0.00233444	0.97
biological_process	GO:1903506	regulation of nucleic acid-templated transcription	0.00242788	0.97
biological_process	GO:2001141	regulation of RNA biosynthetic process	0.00246149	0.97
biological_process	GO:0019985	translesion synthesis	0.00252472	0.97
biological_process	GO:0001816	cytokine production	0.00274508	0.97
biological_process	GO:0051171	regulation of nitrogen compound metabolic process	0.00303466	0.97
biological_process	GO:0006281	DNA repair	0.00303717	0.97
biological_process	GO:0032480	negative regulation of type I interferon production	0.0031686	0.97
biological_process	GO:0043330	response to exogenous dsRNA	0.0031686	0.97
biological_process	GO:0006351	transcription, DNA-templated	0.00322128	0.97
biological_process	GO:0045646	regulation of erythrocyte differentiation	0.00330566	0.97
biological_process	GO:0032648	regulation of interferon-beta production	0.00344546	0.97
molecular_function	GO:0072570	ADP-D-ribose binding	0.00372628	0.97
cellular_component	GO:0043227	membrane-bounded organelle	0.0102839	0.98
biological_process	GO:0019060	intracellular transport of viral protein in host cell	0.00363899	0.99
biological_process	GO:0030581	symbiont intracellular protein transport in host	0.00363899	0.99
biological_process	GO:0072183	negative regulation of nephron tubule epithelial cell differentiation	0.00363899	0.99
biological_process	GO:1902044	regulation of Fas signaling pathway	0.00363899	0.99
biological_process	GO:0097659	nucleic acid-templated transcription	0.00365085	0.99
biological_process	GO:0012501	programmed cell death	0.00369292	0.99
biological_process	GO:0001961	positive regulation of cytokine-mediated signaling pathway	0.00373324	0.99
biological_process	GO:0032608	interferon-beta production	0.00373324	0.99
biological_process	GO:0032774	RNA biosynthetic process	0.00377513	0.99
biological_process	GO:0000731	DNA synthesis involved in DNA repair	0.0038812	0.99
biological_process	GO:0006733	oxidoreduction coenzyme metabolic process	0.0038812	0.99
biological_process	GO:0006301	postreplication repair	0.00403186	0.99
biological_process	GO:0001959	regulation of cytokine-mediated signaling pathway	0.00403943	0.99
biological_process	GO:0034654	nucleobase-containing compound biosynthetic process	0.00409717	0.99
biological_process	GO:0043331	response to dsRNA	0.0041852	0.99
biological_process	GO:0080090	regulation of primary metabolic process	0.0043794	0.99
biological_process	GO:0051098	regulation of binding	0.0045285	0.99
biological_process	GO:0070936	protein K48-linked ubiquitination	0.00466129	0.99
biological_process	GO:0050794	regulation of cellular process	0.00468988	0.99
biological_process	GO:0018130	heterocycle biosynthetic process	0.00475976	0.99
biological_process	GO:0019438	aromatic compound biosynthetic process	0.00487278	0.99
biological_process	GO:0031349	positive regulation of defense response	0.005018	0.99
biological_process	GO:0016070	RNA metabolic process	0.00501963	0.99
biological_process	GO:0045893	positive regulation of transcription, DNA-templated	0.00533178	0.99
biological_process	GO:0002221	pattern recognition receptor signaling pathway	0.0054427	0.99
molecular_function	GO:0042393	histone binding	0.00579835	0.99
cellular_component	GO:0032587	ruffle membrane	0.0114249	0.99
cellular_component	GO:0005654	nucleoplasm	0.0114308	0.99
cellular_component	GO:0030870	Mre11 complex	0.0120104	0.99
cellular_component	GO:0030893	meiotic cohesin complex	0.0120104	0.99
biological_process	GO:0003340	negative regulation of mesenchymal to epithelial transition involved in metanephros morphogenesis	0.00545366	1
biological_process	GO:0030683	mitigation of host immune response by virus	0.00545366	1
biological_process	GO:0034343	type III interferon production	0.00545366	1
biological_process	GO:0034344	regulation of type III interferon production	0.00545366	1
biological_process	GO:0072135	kidney mesenchymal cell proliferation	0.00545366	1
biological_process	GO:0072136	metanephric mesenchymal cell proliferation involved in metanephros development	0.00545366	1
biological_process	GO:1901664	regulation of NAD+ ADP-ribosyltransferase activity	0.00545366	1
biological_process	GO:1901666	positive regulation of NAD+ ADP-ribosyltransferase activity	0.00545366	1
biological_process	GO:0048583	regulation of response to stimulus	0.00551004	1
biological_process	GO:0006139	nucleobase-containing compound metabolic process	0.00558512	1
biological_process	GO:0008219	cell death	0.00569734	1
biological_process	GO:0051701	interaction with host	0.00583381	1
biological_process	GO:0031396	regulation of protein ubiquitination	0.00599486	1
biological_process	GO:0006259	DNA metabolic process	0.00607313	1
biological_process	GO:0045739	positive regulation of DNA repair	0.00623171	1
biological_process	GO:0031323	regulation of cellular metabolic process	0.00645448	1
biological_process	GO:0050790	regulation of catalytic activity	0.0067953	1
biological_process	GO:0045089	positive regulation of innate immune response	0.00684018	1
biological_process	GO:1901362	organic cyclic compound biosynthetic process	0.00685696	1
biological_process	GO:0050789	regulation of biological process	0.00706621	1
biological_process	GO:2000112	regulation of cellular macromolecule biosynthetic process	0.00719308	1
biological_process	GO:0006659	phosphatidylserine biosynthetic process	0.00726512	1
biological_process	GO:0010847	regulation of chromatin assembly	0.00726512	1
biological_process	GO:0034124	regulation of MyD88-dependent toll-like receptor signaling pathway	0.00726512	1
biological_process	GO:0035549	positive regulation of interferon-beta secretion	0.00726512	1
biological_process	GO:0036337	Fas signaling pathway	0.00726512	1
biological_process	GO:1900245	positive regulation of MDA-5 signaling pathway	0.00726512	1
biological_process	GO:1903487	regulation of lactation	0.00726512	1
biological_process	GO:1903508	positive regulation of nucleic acid-templated transcription	0.00738766	1
biological_process	GO:1902680	positive regulation of RNA biosynthetic process	0.00741469	1
molecular_function	GO:0004694	eukaryotic translation initiation factor 2alpha kinase activity	0.0074391	1
molecular_function	GO:0003690	double-stranded DNA binding	0.00762038	1
biological_process	GO:0097191	extrinsic apoptotic signaling pathway	0.00775324	1
biological_process	GO:0046483	heterocycle metabolic process	0.00776684	1
biological_process	GO:1900182	positive regulation of protein localization to nucleus	0.00800996	1
biological_process	GO:0006725	cellular aromatic compound metabolic process	0.0083861	1
biological_process	GO:1903320	regulation of protein modification by small protein conjugation or removal	0.00843338	1
biological_process	GO:2000779	regulation of double-strand break repair	0.00864772	1
biological_process	GO:0003373	dynamin family protein polymerization involved in membrane fission	0.00907338	1
biological_process	GO:0003374	dynamin family protein polymerization involved in mitochondrial fission	0.00907338	1
biological_process	GO:0019049	mitigation of host defenses by virus	0.00907338	1
biological_process	GO:0030682	mitigation of host defenses by symbiont	0.00907338	1
biological_process	GO:0035546	interferon-beta secretion	0.00907338	1
biological_process	GO:0035547	regulation of interferon-beta secretion	0.00907338	1
biological_process	GO:0051097	negative regulation of helicase activity	0.00907338	1
biological_process	GO:0052173	response to defenses of other organism	0.00907338	1
biological_process	GO:0052200	response to host defenses	0.00907338	1
biological_process	GO:0072162	metanephric mesenchymal cell differentiation	0.00907338	1
biological_process	GO:0075136	response to host	0.00907338	1
biological_process	GO:2000646	positive regulation of receptor catabolic process	0.00907338	1
biological_process	GO:2000697	negative regulation of epithelial cell differentiation involved in kidney development	0.00907338	1
biological_process	GO:0043462	regulation of ATPase activity	0.00930758	1
biological_process	GO:0010556	regulation of macromolecule biosynthetic process	0.00977721	1
biological_process	GO:0051172	negative regulation of nitrogen compound metabolic process	0.00984629	1
biological_process	GO:0051254	positive regulation of RNA metabolic process	0.00997026	1
biological_process	GO:0006302	double-strand break repair	0.0102284	1
biological_process	GO:1903706	regulation of hemopoiesis	0.0104893	1
biological_process	GO:0045637	regulation of myeloid cell differentiation	0.0105665	1
biological_process	GO:0006303	double-strand break repair via nonhomologous end joining	0.0106926	1
molecular_function	GO:0003677	DNA binding	0.0107558	1
biological_process	GO:0002372	myeloid dendritic cell cytokine production	0.0108784	1
biological_process	GO:0002733	regulation of myeloid dendritic cell cytokine production	0.0108784	1
biological_process	GO:0002735	positive regulation of myeloid dendritic cell cytokine production	0.0108784	1
biological_process	GO:0009597	detection of virus	0.0108784	1
biological_process	GO:0032020	ISG15-protein conjugation	0.0108784	1
biological_process	GO:0032534	regulation of microvillus assembly	0.0108784	1
biological_process	GO:0046826	negative regulation of protein export from nucleus	0.0108784	1
biological_process	GO:0051902	negative regulation of mitochondrial depolarization	0.0108784	1
biological_process	GO:0060332	positive regulation of response to interferon-gamma	0.0108784	1
biological_process	GO:0060335	positive regulation of interferon-gamma-mediated signaling pathway	0.0108784	1
biological_process	GO:2000110	negative regulation of macrophage apoptotic process	0.0108784	1
biological_process	GO:2000371	regulation of DNA topoisomerase (ATP-hydrolyzing) activity	0.0108784	1
biological_process	GO:2000373	positive regulation of DNA topoisomerase (ATP-hydrolyzing) activity	0.0108784	1
molecular_function	GO:0070087	chromo shadow domain binding	0.0111385	1
biological_process	GO:0008285	negative regulation of cell population proliferation	0.0115264	1
biological_process	GO:0050778	positive regulation of immune response	0.0115264	1
biological_process	GO:0045778	positive regulation of ossification	0.0116635	1
biological_process	GO:0051091	positive regulation of DNA-binding transcription factor activity	0.0117403	1
biological_process	GO:0034504	protein localization to nucleus	0.0118617	1
biological_process	GO:0045639	positive regulation of myeloid cell differentiation	0.0119121	1
biological_process	GO:0062207	regulation of pattern recognition receptor signaling pathway	0.0124163	1
biological_process	GO:0000726	non-recombinational repair	0.0126718	1
biological_process	GO:0002732	positive regulation of dendritic cell cytokine production	0.0126803	1
biological_process	GO:0039533	regulation of MDA-5 signaling pathway	0.0126803	1
biological_process	GO:0070212	protein poly-ADP-ribosylation	0.0126803	1
biological_process	GO:0072257	metanephric nephron tubule epithelial cell differentiation	0.0126803	1
biological_process	GO:0072307	regulation of metanephric nephron tubule epithelial cell differentiation	0.0126803	1
biological_process	GO:1904180	negative regulation of membrane depolarization	0.0126803	1
biological_process	GO:1901360	organic cyclic compound metabolic process	0.0127103	1
molecular_function	GO:0031730	CCR5 chemokine receptor binding	0.0129832	1
biological_process	GO:0031326	regulation of cellular biosynthetic process	0.0132346	1
biological_process	GO:0060255	regulation of macromolecule metabolic process	0.0133197	1
biological_process	GO:2001022	positive regulation of response to DNA damage stimulus	0.0134523	1
biological_process	GO:0070647	protein modification by small protein conjugation or removal	0.0138734	1
biological_process	GO:0030522	intracellular receptor signaling pathway	0.013903	1
biological_process	GO:0051817	modulation of process of other organism involved in symbiotic interaction	0.013984	1
biological_process	GO:0032103	positive regulation of response to external stimulus	0.0141484	1
biological_process	GO:0003339	regulation of mesenchymal to epithelial transition involved in metanephros morphogenesis	0.014479	1
biological_process	GO:0034127	regulation of MyD88-independent toll-like receptor signaling pathway	0.014479	1
biological_process	GO:0038114	interleukin-21-mediated signaling pathway	0.014479	1
biological_process	GO:0072161	mesenchymal cell differentiation involved in kidney development	0.014479	1
biological_process	GO:0098756	response to interleukin-21	0.014479	1
biological_process	GO:0098757	cellular response to interleukin-21	0.014479	1
biological_process	GO:1900045	negative regulation of protein K63-linked ubiquitination	0.014479	1
biological_process	GO:1900246	positive regulation of RIG-I signaling pathway	0.014479	1
biological_process	GO:1902965	regulation of protein localization to early endosome	0.014479	1
biological_process	GO:1902966	positive regulation of protein localization to early endosome	0.014479	1
biological_process	GO:2001012	mesenchymal cell differentiation involved in renal system development	0.014479	1
molecular_function	GO:0042609	CD4 receptor binding	0.0148245	1
molecular_function	GO:0016757	transferase activity, transferring glycosyl groups	0.0150648	1
biological_process	GO:0046822	regulation of nucleocytoplasmic transport	0.0153527	1
cellular_component	GO:0008385	IkappaB kinase complex	0.0154161	1
biological_process	GO:0009889	regulation of biosynthetic process	0.0155924	1
biological_process	GO:1903827	regulation of cellular protein localization	0.015658	1
biological_process	GO:0016567	protein ubiquitination	0.0157567	1
molecular_function	GO:1901363	heterocyclic compound binding	0.0159127	1
molecular_function	GO:0035639	purine ribonucleoside triphosphate binding	0.016068	1
biological_process	GO:0001672	regulation of chromatin assembly or disassembly	0.0162745	1
biological_process	GO:0010911	regulation of isomerase activity	0.0162745	1
biological_process	GO:0010912	positive regulation of isomerase activity	0.0162745	1
biological_process	GO:0019043	establishment of viral latency	0.0162745	1
biological_process	GO:0038113	interleukin-9-mediated signaling pathway	0.0162745	1
biological_process	GO:0071355	cellular response to interleukin-9	0.0162745	1
biological_process	GO:0072217	negative regulation of metanephros development	0.0162745	1
biological_process	GO:0072642	interferon-alpha secretion	0.0162745	1
biological_process	GO:1902739	regulation of interferon-alpha secretion	0.0162745	1
biological_process	GO:1902741	positive regulation of interferon-alpha secretion	0.0162745	1
molecular_function	GO:0017111	nucleoside-triphosphatase activity	0.0164031	1
biological_process	GO:0031324	negative regulation of cellular metabolic process	0.0164223	1
biological_process	GO:0045935	positive regulation of nucleobase-containing compound metabolic process	0.0166691	1
molecular_function	GO:0005524	ATP binding	0.0170582	1
biological_process	GO:0000122	negative regulation of transcription by RNA polymerase II	0.0170782	1
biological_process	GO:0044092	negative regulation of molecular function	0.017211	1
biological_process	GO:0010557	positive regulation of macromolecule biosynthetic process	0.0173269	1
molecular_function	GO:0097367	carbohydrate derivative binding	0.0174893	1
biological_process	GO:0035821	modulation of process of other organism	0.0179552	1
biological_process	GO:0006357	regulation of transcription by RNA polymerase II	0.0179964	1
biological_process	GO:0010998	regulation of translational initiation by eIF2 alpha phosphorylation	0.0180668	1
biological_process	GO:0071104	response to interleukin-9	0.0180668	1
biological_process	GO:0072203	cell proliferation involved in metanephros development	0.0180668	1
biological_process	GO:0072641	type I interferon secretion	0.0180668	1
biological_process	GO:1902033	regulation of hematopoietic stem cell proliferation	0.0180668	1
biological_process	GO:1902915	negative regulation of protein polyubiquitination	0.0180668	1
biological_process	GO:2000109	regulation of macrophage apoptotic process	0.0180668	1
biological_process	GO:2000644	regulation of receptor catabolic process	0.0180668	1
biological_process	GO:0030218	erythrocyte differentiation	0.0182552	1
molecular_function	GO:0017128	phospholipid scramblase activity	0.0184972	1
molecular_function	GO:0097159	organic cyclic compound binding	0.0185201	1
biological_process	GO:1900180	regulation of protein localization to nucleus	0.0188616	1
molecular_function	GO:0032555	purine ribonucleotide binding	0.0195462	1
biological_process	GO:0002730	regulation of dendritic cell cytokine production	0.019856	1
biological_process	GO:0019042	viral latency	0.019856	1
biological_process	GO:0035457	cellular response to interferon-alpha	0.019856	1
biological_process	GO:0045351	type I interferon biosynthetic process	0.019856	1
biological_process	GO:0070106	interleukin-27-mediated signaling pathway	0.019856	1
biological_process	GO:0070757	interleukin-35-mediated signaling pathway	0.019856	1
biological_process	GO:0072608	interleukin-10 secretion	0.019856	1
biological_process	GO:1902946	protein localization to early endosome	0.019856	1
biological_process	GO:1905668	positive regulation of protein localization to endosome	0.019856	1
biological_process	GO:0044271	cellular nitrogen compound biosynthetic process	0.0199939	1
biological_process	GO:0034645	cellular macromolecule biosynthetic process	0.0202493	1
molecular_function	GO:0017076	purine nucleotide binding	0.0203032	1
molecular_function	GO:0031386	protein tag	0.0203286	1
molecular_function	GO:0032553	ribonucleotide binding	0.0204809	1
molecular_function	GO:0016462	pyrophosphatase activity	0.0206205	1
molecular_function	GO:0032559	adenyl ribonucleotide binding	0.0207005	1
biological_process	GO:0006282	regulation of DNA repair	0.0207312	1
biological_process	GO:0034101	erythrocyte homeostasis	0.0207312	1
molecular_function	GO:0016817	hydrolase activity, acting on acid anhydrides	0.0208999	1
molecular_function	GO:0016818	hydrolase activity, acting on acid anhydrides, in phosphorus-containing anhydrides	0.0208999	1
molecular_function	GO:0016740	transferase activity	0.0210958	1
biological_process	GO:0030097	hemopoiesis	0.0212071	1
biological_process	GO:0065007	biological regulation	0.0213724	1
molecular_function	GO:0030554	adenyl nucleotide binding	0.0214493	1
biological_process	GO:0034641	cellular nitrogen compound metabolic process	0.0215753	1
biological_process	GO:0002371	dendritic cell cytokine production	0.021642	1
biological_process	GO:0003337	mesenchymal to epithelial transition involved in metanephros morphogenesis	0.021642	1
biological_process	GO:0033523	histone H2B ubiquitination	0.021642	1
biological_process	GO:0051095	regulation of helicase activity	0.021642	1
biological_process	GO:0060368	regulation of Fc receptor mediated stimulatory signaling pathway	0.021642	1
biological_process	GO:0071888	macrophage apoptotic process	0.021642	1
biological_process	GO:0072520	seminiferous tubule development	0.021642	1
biological_process	GO:0090148	membrane fission	0.021642	1
biological_process	GO:1900044	regulation of protein K63-linked ubiquitination	0.021642	1
biological_process	GO:1905666	regulation of protein localization to endosome	0.021642	1
cellular_component	GO:0000800	lateral element	0.0221934	1
biological_process	GO:0031328	positive regulation of cellular biosynthetic process	0.0229803	1
biological_process	GO:0032446	protein modification by small protein conjugation	0.0230093	1
biological_process	GO:0032530	regulation of microvillus organization	0.0234248	1
biological_process	GO:0032725	positive regulation of granulocyte macrophage colony-stimulating factor production	0.0234248	1
biological_process	GO:0060340	positive regulation of type I interferon-mediated signaling pathway	0.0234248	1
biological_process	GO:0072182	regulation of nephron tubule epithelial cell differentiation	0.0234248	1
biological_process	GO:1900225	regulation of NLRP3 inflammasome complex assembly	0.0234248	1
biological_process	GO:0006366	transcription by RNA polymerase II	0.0247262	1
biological_process	GO:0010628	positive regulation of gene expression	0.0248635	1
biological_process	GO:0009891	positive regulation of biosynthetic process	0.025199	1
biological_process	GO:0043558	regulation of translational initiation in response to stress	0.0252045	1
biological_process	GO:0044546	NLRP3 inflammasome complex assembly	0.0252045	1
biological_process	GO:0048534	hematopoietic or lymphoid organ development	0.0253223	1
cellular_component	GO:0000778	condensed nuclear chromosome kinetochore	0.0255651	1
cellular_component	GO:0001673	male germ cell nucleus	0.0255651	1
biological_process	GO:0009059	macromolecule biosynthetic process	0.0263735	1
biological_process	GO:0032645	regulation of granulocyte macrophage colony-stimulating factor production	0.026981	1
biological_process	GO:0033689	negative regulation of osteoblast proliferation	0.026981	1
biological_process	GO:0051770	positive regulation of nitric-oxide synthase biosynthetic process	0.026981	1
biological_process	GO:0072075	metanephric mesenchyme development	0.026981	1
biological_process	GO:0072160	nephron tubule epithelial cell differentiation	0.026981	1
biological_process	GO:0072283	metanephric renal vesicle morphogenesis	0.026981	1
biological_process	GO:0048584	positive regulation of response to stimulus	0.0272116	1
cellular_component	GO:0008278	cohesin complex	0.0272467	1
biological_process	GO:0010605	negative regulation of macromolecule metabolic process	0.0282837	1
biological_process	GO:0030033	microvillus assembly	0.0287544	1
biological_process	GO:0032604	granulocyte macrophage colony-stimulating factor production	0.0287544	1
biological_process	GO:0033033	negative regulation of myeloid cell apoptotic process	0.0287544	1
biological_process	GO:0044827	modulation by host of viral genome replication	0.0287544	1
biological_process	GO:0051444	negative regulation of ubiquitin-protein transferase activity	0.0287544	1
biological_process	GO:0009108	coenzyme biosynthetic process	0.0289368	1
biological_process	GO:0033554	cellular response to stress	0.0292578	1
biological_process	GO:0002262	myeloid cell homeostasis	0.0293029	1
molecular_function	GO:0005521	lamin binding	0.0294359	1
biological_process	GO:0051092	positive regulation of NF-kappaB transcription factor activity	0.0300407	1
biological_process	GO:0006978	DNA damage response, signal transduction by p53 class mediator resulting in transcription of p21 class mediator	0.0305247	1
biological_process	GO:0017121	plasma membrane phospholipid scrambling	0.0305247	1
biological_process	GO:0090185	negative regulation of kidney development	0.0305247	1
biological_process	GO:1905331	negative regulation of morphogenesis of an epithelium	0.0305247	1
biological_process	GO:0019222	regulation of metabolic process	0.0306279	1
cellular_component	GO:0031966	mitochondrial membrane	0.0311395	1
molecular_function	GO:0140110	transcription regulator activity	0.0314527	1
biological_process	GO:0002520	immune system development	0.0315746	1
molecular_function	GO:0046872	metal ion binding	0.0321065	1
cellular_component	GO:0043073	germ cell nucleus	0.0322746	1
biological_process	GO:0007221	positive regulation of transcription of Notch receptor target	0.0322918	1
biological_process	GO:0039535	regulation of RIG-I signaling pathway	0.0322918	1
biological_process	GO:0042772	DNA damage response, signal transduction resulting in transcription	0.0322918	1
biological_process	GO:0043555	regulation of translation in response to stress	0.0322918	1
biological_process	GO:0072077	renal vesicle morphogenesis	0.0322918	1
biological_process	GO:2001236	regulation of extrinsic apoptotic signaling pathway	0.0322986	1
biological_process	GO:0007259	receptor signaling pathway via JAK-STAT	0.0338401	1
biological_process	GO:0032780	negative regulation of ATPase activity	0.0340558	1
biological_process	GO:0046597	negative regulation of viral entry into host cell	0.0340558	1
biological_process	GO:0060231	mesenchymal to epithelial transition	0.0340558	1
biological_process	GO:0061081	positive regulation of myeloid leukocyte cytokine production involved in immune response	0.0340558	1
biological_process	GO:0072074	kidney mesenchyme development	0.0340558	1
biological_process	GO:0072087	renal vesicle development	0.0340558	1
biological_process	GO:2000696	regulation of epithelial cell differentiation involved in kidney development	0.0340558	1
cellular_component	GO:0031256	leading edge membrane	0.0346184	1
molecular_function	GO:0140098	catalytic activity, acting on RNA	0.0346619	1
molecular_function	GO:0000339	RNA cap binding	0.0348607	1
molecular_function	GO:0140303	intramembrane lipid transporter activity	0.0348607	1
cellular_component	GO:0001726	ruffle	0.0353648	1
biological_process	GO:0007130	synaptonemal complex assembly	0.0358167	1
biological_process	GO:0035458	cellular response to interferon-beta	0.0358167	1
biological_process	GO:0045655	regulation of monocyte differentiation	0.0358167	1
biological_process	GO:0046823	negative regulation of nucleocytoplasmic transport	0.0358167	1
biological_process	GO:0051767	nitric-oxide synthase biosynthetic process	0.0358167	1
biological_process	GO:0051769	regulation of nitric-oxide synthase biosynthetic process	0.0358167	1
biological_process	GO:0072234	metanephric nephron tubule development	0.0358167	1
molecular_function	GO:0003824	catalytic activity	0.0358415	1
biological_process	GO:0032880	regulation of protein localization	0.0364646	1
biological_process	GO:0002244	hematopoietic progenitor cell differentiation	0.0366061	1
molecular_function	GO:0008144	drug binding	0.0370797	1
biological_process	GO:0009617	response to bacterium	0.0371264	1
molecular_function	GO:0042802	identical protein binding	0.0371807	1
cellular_component	GO:0005740	mitochondrial envelope	0.03726	1
biological_process	GO:0039531	regulation of viral-induced cytoplasmic pattern recognition receptor signaling pathway	0.0375745	1
biological_process	GO:0051900	regulation of mitochondrial depolarization	0.0375745	1
biological_process	GO:0072111	cell proliferation involved in kidney development	0.0375745	1
biological_process	GO:1904469	positive regulation of tumor necrosis factor secretion	0.0375745	1
biological_process	GO:0044093	positive regulation of molecular function	0.0375957	1
cellular_component	GO:0005741	mitochondrial outer membrane	0.0376416	1
molecular_function	GO:0043169	cation binding	0.0377177	1
biological_process	GO:0051100	negative regulation of binding	0.0378176	1
biological_process	GO:0097696	receptor signaling pathway via STAT	0.0378176	1
molecular_function	GO:0000166	nucleotide binding	0.0378509	1
molecular_function	GO:1901265	nucleoside phosphate binding	0.0379431	1
biological_process	GO:0043433	negative regulation of DNA-binding transcription factor activity	0.0382248	1
biological_process	GO:0006508	proteolysis	0.0382965	1
molecular_function	GO:0070530	K63-linked polyubiquitin modification-dependent protein binding	0.038461	1
molecular_function	GO:0043167	ion binding	0.0390161	1
biological_process	GO:0006925	inflammatory cell apoptotic process	0.0393291	1
biological_process	GO:0051457	maintenance of protein location in nucleus	0.0393291	1
biological_process	GO:0072643	interferon-gamma secretion	0.0393291	1
biological_process	GO:0030099	myeloid cell differentiation	0.0394756	1
biological_process	GO:0051882	mitochondrial depolarization	0.0410807	1
biological_process	GO:0070193	synaptonemal complex organization	0.0410807	1
biological_process	GO:0071425	hematopoietic stem cell proliferation	0.0410807	1
biological_process	GO:0072170	metanephric tubule development	0.0410807	1
biological_process	GO:0072215	regulation of metanephros development	0.0410807	1
biological_process	GO:0072243	metanephric nephron epithelium development	0.0410807	1
biological_process	GO:0051240	positive regulation of multicellular organismal process	0.0417193	1
biological_process	GO:0006611	protein export from nucleus	0.0419659	1
biological_process	GO:0051099	positive regulation of binding	0.0419659	1
biological_process	GO:0007141	male meiosis I	0.0428291	1
biological_process	GO:0032528	microvillus organization	0.0428291	1
biological_process	GO:0036010	protein localization to endosome	0.0428291	1
biological_process	GO:1902914	regulation of protein polyubiquitination	0.0428291	1
cellular_component	GO:0000780	condensed nuclear chromosome, centromeric region	0.0439084	1
biological_process	GO:0009892	negative regulation of metabolic process	0.0444692	1
biological_process	GO:1903708	positive regulation of hemopoiesis	0.044534	1
biological_process	GO:0002053	positive regulation of mesenchymal cell proliferation	0.0445744	1
biological_process	GO:0033522	histone H2A ubiquitination	0.0445744	1
biological_process	GO:0072202	cell differentiation involved in metanephros development	0.0445744	1
biological_process	GO:0072273	metanephric nephron morphogenesis	0.0445744	1
cellular_component	GO:0031974	membrane-enclosed lumen	0.0446457	1
cellular_component	GO:0043233	organelle lumen	0.0446457	1
cellular_component	GO:0070013	intracellular organelle lumen	0.0446457	1
biological_process	GO:0001556	oocyte maturation	0.0463167	1
biological_process	GO:0032897	negative regulation of viral transcription	0.0463167	1
molecular_function	GO:0016887	ATPase activity	0.0464436	1
cellular_component	GO:0031968	organelle outer membrane	0.0468698	1
biological_process	GO:0051054	positive regulation of DNA metabolic process	0.0471595	1
molecular_function	GO:0005488	binding	0.0474572	1
cellular_component	GO:0019867	outer membrane	0.0477082	1
biological_process	GO:0007219	Notch signaling pathway	0.0480472	1
biological_process	GO:0072207	metanephric epithelium development	0.0480559	1
biological_process	GO:0051168	nuclear export	0.0484933	1
biological_process	GO:0071897	DNA biosynthetic process	0.0493902	1
biological_process	GO:0032269	negative regulation of cellular protein metabolic process	0.0494898	1
biological_process	GO:0010468	regulation of gene expression	0.0497466	1
biological_process	GO:0033688	regulation of osteoblast proliferation	0.049792	1
biological_process	GO:2000113	negative regulation of cellular macromolecule biosynthetic process	0.0499582	1
biological_process	GO:0009966	regulation of signal transduction	0.051071	1
biological_process	GO:0010390	histone monoubiquitination	0.051525	1
biological_process	GO:0033032	regulation of myeloid cell apoptotic process	0.051525	1
biological_process	GO:0035666	TRIF-dependent toll-like receptor signaling pathway	0.051525	1
biological_process	GO:0070102	interleukin-6-mediated signaling pathway	0.051525	1
biological_process	GO:0120033	negative regulation of plasma membrane bounded cell projection assembly	0.051525	1
biological_process	GO:0030278	regulation of ossification	0.052577	1
biological_process	GO:0010646	regulation of cell communication	0.0526101	1
molecular_function	GO:0035035	histone acetyltransferase binding	0.0527322	1
biological_process	GO:0044788	modulation by host of viral process	0.053255	1
biological_process	GO:0046596	regulation of viral entry into host cell	0.053255	1
biological_process	GO:0048147	negative regulation of fibroblast proliferation	0.053255	1
biological_process	GO:0050690	regulation of defense response to virus by virus	0.053255	1
biological_process	GO:0061082	myeloid leukocyte cytokine production	0.053255	1
biological_process	GO:0043170	macromolecule metabolic process	0.0536694	1
molecular_function	GO:0008266	poly(U) RNA binding	0.0545016	1
biological_process	GO:0006658	phosphatidylserine metabolic process	0.0549819	1
biological_process	GO:0019048	modulation by virus of host process	0.0549819	1
biological_process	GO:0033687	osteoblast proliferation	0.0549819	1
molecular_function	GO:0005164	tumor necrosis factor receptor binding	0.0562678	1
biological_process	GO:0023051	regulation of signaling	0.0565255	1
biological_process	GO:0003338	metanephros morphogenesis	0.0567057	1
biological_process	GO:1904467	regulation of tumor necrosis factor secretion	0.0567057	1
biological_process	GO:2000778	positive regulation of interleukin-6 secretion	0.0567057	1
biological_process	GO:2001020	regulation of response to DNA damage stimulus	0.0577301	1
biological_process	GO:0044265	cellular macromolecule catabolic process	0.057799	1
molecular_function	GO:0051721	protein phosphatase 2A binding	0.0580307	1
biological_process	GO:0002756	MyD88-independent toll-like receptor signaling pathway	0.0584265	1
biological_process	GO:0002888	positive regulation of myeloid leukocyte mediated immunity	0.0584265	1
biological_process	GO:0010464	regulation of mesenchymal cell proliferation	0.0584265	1
biological_process	GO:0033028	myeloid cell apoptotic process	0.0584265	1
biological_process	GO:0043086	negative regulation of catalytic activity	0.058865	1
biological_process	GO:0043393	regulation of protein binding	0.0591653	1
biological_process	GO:0016064	immunoglobulin mediated immune response	0.0596465	1
molecular_function	GO:0005154	epidermal growth factor receptor binding	0.0597905	1
molecular_function	GO:0008187	poly-pyrimidine tract binding	0.0597905	1
biological_process	GO:0002699	positive regulation of immune effector process	0.060129	1
biological_process	GO:0062208	positive regulation of pattern recognition receptor signaling pathway	0.0601442	1
biological_process	GO:0019724	B cell mediated immunity	0.0610983	1
biological_process	GO:0051248	negative regulation of protein metabolic process	0.0611597	1
molecular_function	GO:0000979	RNA polymerase II core promoter sequence-specific DNA binding	0.0615471	1
biological_process	GO:0000266	mitochondrial fission	0.0618589	1
biological_process	GO:0032801	receptor catabolic process	0.0618589	1
biological_process	GO:0045070	positive regulation of viral genome replication	0.0618589	1
biological_process	GO:0060338	regulation of type I interferon-mediated signaling pathway	0.0618589	1
biological_process	GO:0110111	negative regulation of animal organ morphogenesis	0.0618589	1
biological_process	GO:1990774	tumor necrosis factor secretion	0.0618589	1
molecular_function	GO:0043168	anion binding	0.0623989	1
biological_process	GO:0010558	negative regulation of macromolecule biosynthetic process	0.0628598	1
biological_process	GO:0002755	MyD88-dependent toll-like receptor signaling pathway	0.0635706	1
biological_process	GO:0010742	macrophage derived foam cell differentiation	0.0635706	1
biological_process	GO:0030224	monocyte differentiation	0.0635706	1
biological_process	GO:0090077	foam cell differentiation	0.0635706	1
biological_process	GO:1901099	negative regulation of signal transduction in absence of ligand	0.0635706	1
biological_process	GO:1903131	mononuclear cell differentiation	0.0635706	1
biological_process	GO:2001240	negative regulation of extrinsic apoptotic signaling pathway in absence of ligand	0.0635706	1
biological_process	GO:0042981	regulation of apoptotic process	0.064284	1
biological_process	GO:0045944	positive regulation of transcription by RNA polymerase II	0.0646325	1
biological_process	GO:0052372	modulation by symbiont of entry into host	0.0652792	1
biological_process	GO:0035556	intracellular signal transduction	0.0656076	1
biological_process	GO:0051188	cofactor biosynthetic process	0.0660251	1
biological_process	GO:0006807	nitrogen compound metabolic process	0.0666656	1
cellular_component	GO:0000795	synaptonemal complex	0.0667704	1
cellular_component	GO:0099086	synaptonemal structure	0.0667704	1
biological_process	GO:0045892	negative regulation of transcription, DNA-templated	0.0670732	1
biological_process	GO:0010629	negative regulation of gene expression	0.0672638	1
biological_process	GO:0048518	positive regulation of biological process	0.0677117	1
biological_process	GO:0043067	regulation of programmed cell death	0.0686738	1
biological_process	GO:0030501	positive regulation of bone mineralization	0.0686874	1
biological_process	GO:0072595	maintenance of protein localization in organelle	0.0686874	1
biological_process	GO:0043122	regulation of I-kappaB kinase/NF-kappaB signaling	0.069044	1
biological_process	GO:0044260	cellular macromolecule metabolic process	0.069174	1
biological_process	GO:0044003	modulation by symbiont of host process	0.070387	1
biological_process	GO:0072210	metanephric nephron development	0.070387	1
biological_process	GO:0050663	cytokine secretion	0.0705705	1
biological_process	GO:0090317	negative regulation of intracellular protein transport	0.0720835	1
molecular_function	GO:0000981	DNA-binding transcription factor activity, RNA polymerase II-specific	0.0724933	1
biological_process	GO:0031327	negative regulation of cellular biosynthetic process	0.0725524	1
biological_process	GO:0048872	homeostasis of number of cells	0.0736571	1
biological_process	GO:0033003	regulation of mast cell activation	0.0737771	1
biological_process	GO:0034198	cellular response to amino acid starvation	0.0754676	1
biological_process	GO:0045332	phospholipid translocation	0.0754676	1
biological_process	GO:0033157	regulation of intracellular protein transport	0.075739	1
biological_process	GO:0009890	negative regulation of biosynthetic process	0.0767364	1
biological_process	GO:0010463	mesenchymal cell proliferation	0.0771552	1
biological_process	GO:0034204	lipid translocation	0.0771552	1
biological_process	GO:0035850	epithelial cell differentiation involved in kidney development	0.0771552	1
molecular_function	GO:0048020	CCR chemokine receptor binding	0.077214	1
biological_process	GO:1903507	negative regulation of nucleic acid-templated transcription	0.0775655	1
biological_process	GO:1902679	negative regulation of RNA biosynthetic process	0.0779784	1
biological_process	GO:0006732	coenzyme metabolic process	0.0783682	1
biological_process	GO:0016574	histone ubiquitination	0.0788397	1
molecular_function	GO:0000978	RNA polymerase II cis-regulatory region sequence-specific DNA binding	0.0798984	1
biological_process	GO:0007129	synapsis	0.0805213	1
biological_process	GO:0048599	oocyte development	0.0805213	1
biological_process	GO:0071354	cellular response to interleukin-6	0.0805213	1
biological_process	GO:1990928	response to amino acid starvation	0.0805213	1
molecular_function	GO:0001046	core promoter sequence-specific DNA binding	0.080661	1
molecular_function	GO:0001047	core promoter binding	0.080661	1
biological_process	GO:0006953	acute-phase response	0.0821999	1
biological_process	GO:0070169	positive regulation of biomineral tissue development	0.0821999	1
biological_process	GO:0110151	positive regulation of biomineralization	0.0821999	1
biological_process	GO:2000107	negative regulation of leukocyte apoptotic process	0.0821999	1
biological_process	GO:2001239	regulation of extrinsic apoptotic signaling pathway in absence of ligand	0.0821999	1
biological_process	GO:0043066	negative regulation of apoptotic process	0.0823124	1
molecular_function	GO:0004715	non-membrane spanning protein tyrosine kinase activity	0.0823797	1
molecular_function	GO:0032813	tumor necrosis factor receptor superfamily binding	0.0823797	1
biological_process	GO:0007140	male meiotic nuclear division	0.0838756	1
biological_process	GO:0007595	lactation	0.0838756	1
biological_process	GO:0072604	interleukin-6 secretion	0.0838756	1
molecular_function	GO:0036094	small molecule binding	0.0846283	1
biological_process	GO:0003254	regulation of membrane depolarization	0.0855482	1
biological_process	GO:0030857	negative regulation of epithelial cell differentiation	0.0855482	1
biological_process	GO:0032757	positive regulation of interleukin-8 production	0.0855482	1
biological_process	GO:0043124	negative regulation of I-kappaB kinase/NF-kappaB signaling	0.0855482	1
cellular_component	GO:0000228	nuclear chromosome	0.0856964	1
molecular_function	GO:0004177	aminopeptidase activity	0.085808	1
molecular_function	GO:1990841	promoter-specific chromatin binding	0.085808	1
biological_process	GO:0007249	I-kappaB kinase/NF-kappaB signaling	0.0858815	1
molecular_function	GO:0000987	cis-regulatory region sequence-specific DNA binding	0.0861705	1
molecular_function	GO:0035326	cis-regulatory region binding	0.0861705	1
biological_process	GO:0042398	cellular modified amino acid biosynthetic process	0.0872179	1
biological_process	GO:0070534	protein K63-linked ubiquitination	0.0872179	1
biological_process	GO:0070741	response to interleukin-6	0.0872179	1
biological_process	GO:0097035	regulation of membrane lipid distribution	0.0872179	1
biological_process	GO:0043069	negative regulation of programmed cell death	0.0875491	1
biological_process	GO:0009994	oocyte differentiation	0.0888846	1
biological_process	GO:0008333	endosome to lysosome transport	0.0905484	1
biological_process	GO:0051438	regulation of ubiquitin-protein transferase activity	0.0905484	1
biological_process	GO:0009165	nucleotide biosynthetic process	0.0908242	1
biological_process	GO:0010941	regulation of cell death	0.0909051	1
molecular_function	GO:0031593	polyubiquitin modification-dependent protein binding	0.090927	1
biological_process	GO:0048523	negative regulation of cellular process	0.0911066	1
molecular_function	GO:0003700	DNA-binding transcription factor activity	0.0911179	1
cellular_component	GO:0031965	nuclear membrane	0.0920984	1
biological_process	GO:0000186	activation of MAPKK activity	0.0922093	1
biological_process	GO:0007131	reciprocal meiotic recombination	0.0922093	1
biological_process	GO:0031638	zymogen activation	0.0922093	1
molecular_function	GO:0005548	phospholipid transporter activity	0.0926272	1
biological_process	GO:0090407	organophosphate biosynthetic process	0.0927748	1
biological_process	GO:1901293	nucleoside phosphate biosynthetic process	0.093048	1
biological_process	GO:0002720	positive regulation of cytokine production involved in immune response	0.0938671	1
biological_process	GO:0035825	homologous recombination	0.0938671	1
biological_process	GO:0043392	negative regulation of DNA binding	0.0938671	1
biological_process	GO:0061005	cell differentiation involved in kidney development	0.0938671	1
molecular_function	GO:0061629	RNA polymerase II-specific DNA-binding transcription factor binding	0.0939313	1
molecular_function	GO:0001102	RNA polymerase II activating transcription factor binding	0.0943243	1
molecular_function	GO:0016772	transferase activity, transferring phosphorus-containing groups	0.094562	1
cellular_component	GO:0005637	nuclear inner membrane	0.0953857	1
biological_process	GO:0032613	interleukin-10 production	0.0955221	1
biological_process	GO:0032781	positive regulation of ATPase activity	0.0955221	1
biological_process	GO:0097190	apoptotic signaling pathway	0.0956518	1
molecular_function	GO:0005515	protein binding	0.0956757	1
biological_process	GO:0051253	negative regulation of RNA metabolic process	0.0971192	1
biological_process	GO:0090183	regulation of kidney development	0.0971741	1
biological_process	GO:0002886	regulation of myeloid leukocyte mediated immunity	0.0988232	1
biological_process	GO:0045143	homologous chromosome segregation	0.0988232	1
biological_process	GO:0071407	cellular response to organic cyclic compound	0.0993004	1
biological_process	GO:0032722	positive regulation of chemokine production	0.100469	1
biological_process	GO:1902041	regulation of extrinsic apoptotic signaling pathway via death domain receptors	0.100469	1
molecular_function	GO:0140096	catalytic activity, acting on a protein	0.10052	1
biological_process	GO:0001818	negative regulation of cytokine production	0.100957	1
biological_process	GO:0031400	negative regulation of protein modification process	0.101517	1
biological_process	GO:0001836	release of cytochrome c from mitochondria	0.102113	1
biological_process	GO:0060341	regulation of cellular localization	0.102782	1
biological_process	GO:0032507	maintenance of protein location in cell	0.103753	1
biological_process	GO:0045576	mast cell activation	0.103753	1
biological_process	GO:0051851	modulation by host of symbiont process	0.103753	1
biological_process	GO:0019941	modification-dependent protein catabolic process	0.104504	1
biological_process	GO:0044766	multi-organism transport	0.10539	1
biological_process	GO:1902579	multi-organism localization	0.10539	1
biological_process	GO:1903902	positive regulation of viral life cycle	0.10539	1
molecular_function	GO:0000049	tRNA binding	0.106118	1
biological_process	GO:0009057	macromolecule catabolic process	0.106435	1
biological_process	GO:0032387	negative regulation of intracellular transport	0.107025	1
cellular_component	GO:0031253	cell projection membrane	0.108291	1
biological_process	GO:0007062	sister chromatid cohesion	0.108656	1
biological_process	GO:0043632	modification-dependent macromolecule catabolic process	0.10867	1
molecular_function	GO:0008235	metalloexopeptidase activity	0.10946	1
molecular_function	GO:0030145	manganese ion binding	0.10946	1
biological_process	GO:0045669	positive regulation of osteoblast differentiation	0.110285	1
biological_process	GO:0046782	regulation of viral transcription	0.110285	1
biological_process	GO:0051173	positive regulation of nitrogen compound metabolic process	0.110405	1
molecular_function	GO:0019899	enzyme binding	0.110703	1
biological_process	GO:0044249	cellular biosynthetic process	0.111054	1
cellular_component	GO:0005694	chromosome	0.111589	1
biological_process	GO:0070192	chromosome organization involved in meiotic cell cycle	0.111911	1
biological_process	GO:0060548	negative regulation of cell death	0.113391	1
biological_process	GO:0006513	protein monoubiquitination	0.113534	1
molecular_function	GO:0042379	chemokine receptor binding	0.116108	1
biological_process	GO:0044238	primary metabolic process	0.116284	1
biological_process	GO:1903829	positive regulation of cellular protein localization	0.117312	1
molecular_function	GO:0030374	nuclear receptor transcription coactivator activity	0.117763	1
biological_process	GO:0051865	protein autoubiquitination	0.118386	1
cellular_component	GO:0018995	host cellular component	0.11858	1
cellular_component	GO:0043657	host cell	0.11858	1
cellular_component	GO:0090734	site of DNA damage	0.11858	1
biological_process	GO:0034121	regulation of toll-like receptor signaling pathway	0.119997	1
biological_process	GO:0072091	regulation of stem cell proliferation	0.119997	1
cellular_component	GO:0098687	chromosomal region	0.120052	1
biological_process	GO:0045934	negative regulation of nucleobase-containing compound metabolic process	0.120843	1
biological_process	GO:0042531	positive regulation of tyrosine phosphorylation of STAT protein	0.121606	1
molecular_function	GO:0003924	GTPase activity	0.121931	1
biological_process	GO:1901576	organic substance biosynthetic process	0.122593	1
biological_process	GO:0038034	signal transduction in absence of ligand	0.123211	1
biological_process	GO:0051881	regulation of mitochondrial membrane potential	0.123211	1
biological_process	GO:0097192	extrinsic apoptotic signaling pathway in absence of ligand	0.123211	1
biological_process	GO:1902036	regulation of hematopoietic stem cell differentiation	0.123211	1
biological_process	GO:0030336	negative regulation of cell migration	0.12331	1
molecular_function	GO:0030234	enzyme regulator activity	0.123602	1
molecular_function	GO:0070491	repressing transcription factor binding	0.124351	1
biological_process	GO:0051239	regulation of multicellular organismal process	0.125348	1
biological_process	GO:0032677	regulation of interleukin-8 production	0.126414	1
biological_process	GO:0006913	nucleocytoplasmic transport	0.128774	1
biological_process	GO:0001937	negative regulation of endothelial cell proliferation	0.129606	1
biological_process	GO:0030500	regulation of bone mineralization	0.129606	1
biological_process	GO:0072088	nephron epithelium morphogenesis	0.129606	1
biological_process	GO:0010647	positive regulation of cell communication	0.129931	1
biological_process	GO:0042592	homeostatic process	0.130169	1
biological_process	GO:0051169	nuclear transport	0.130609	1
biological_process	GO:0051702	interaction with symbiont	0.131198	1
biological_process	GO:1901224	positive regulation of NIK/NF-kappaB signaling	0.131198	1
biological_process	GO:0023056	positive regulation of signaling	0.131599	1
biological_process	GO:2000146	negative regulation of cell motility	0.132449	1
biological_process	GO:0072028	nephron morphogenesis	0.132786	1
biological_process	GO:0051052	regulation of DNA metabolic process	0.13368	1
biological_process	GO:0002449	lymphocyte mediated immunity	0.134296	1
biological_process	GO:0006446	regulation of translational initiation	0.134372	1
biological_process	GO:1901699	cellular response to nitrogen compound	0.136236	1
biological_process	GO:0009058	biosynthetic process	0.13651	1
biological_process	GO:0031325	positive regulation of cellular metabolic process	0.136622	1
molecular_function	GO:0140297	DNA-binding transcription factor binding	0.138855	1
biological_process	GO:0032637	interleukin-8 production	0.139113	1
biological_process	GO:0032642	regulation of chemokine production	0.139113	1
biological_process	GO:0002460	adaptive immune response based on somatic recombination of immune receptors built from immunoglobulin superfamily domains	0.139872	1
biological_process	GO:0051603	proteolysis involved in cellular protein catabolic process	0.140423	1
biological_process	GO:0042509	regulation of tyrosine phosphorylation of STAT protein	0.140688	1
biological_process	GO:0048145	regulation of fibroblast proliferation	0.140688	1
biological_process	GO:0060218	hematopoietic stem cell differentiation	0.140688	1
biological_process	GO:2000106	regulation of leukocyte apoptotic process	0.140688	1
biological_process	GO:0018108	peptidyl-tyrosine phosphorylation	0.141119	1
molecular_function	GO:0046914	transition metal ion binding	0.141144	1
cellular_component	GO:1902554	serine/threonine protein kinase complex	0.141196	1
molecular_function	GO:0019888	protein phosphatase regulator activity	0.142222	1
biological_process	GO:0002718	regulation of cytokine production involved in immune response	0.14226	1
biological_process	GO:0043154	negative regulation of cysteine-type endopeptidase activity involved in apoptotic process	0.14226	1
biological_process	GO:0048144	fibroblast proliferation	0.14226	1
biological_process	GO:0018212	peptidyl-tyrosine modification	0.142993	1
biological_process	GO:1901532	regulation of hematopoietic progenitor cell differentiation	0.143829	1
cellular_component	GO:0031967	organelle envelope	0.144069	1
cellular_component	GO:0031975	envelope	0.144069	1
biological_process	GO:0010604	positive regulation of macromolecule metabolic process	0.144509	1
biological_process	GO:0007260	tyrosine phosphorylation of STAT protein	0.145395	1
biological_process	GO:0008625	extrinsic apoptotic signaling pathway via death domain receptors	0.145395	1
biological_process	GO:0032760	positive regulation of tumor necrosis factor production	0.145395	1
biological_process	GO:0042058	regulation of epidermal growth factor receptor signaling pathway	0.145395	1
biological_process	GO:0032386	regulation of intracellular transport	0.145501	1
biological_process	GO:0051223	regulation of protein transport	0.146787	1
biological_process	GO:0048477	oogenesis	0.146959	1
molecular_function	GO:0033613	activating transcription factor binding	0.147035	1
biological_process	GO:0032088	negative regulation of NF-kappaB transcription factor activity	0.148519	1
biological_process	GO:1903557	positive regulation of tumor necrosis factor superfamily cytokine production	0.148519	1
biological_process	GO:0032602	chemokine production	0.150077	1
biological_process	GO:0046427	positive regulation of receptor signaling pathway via JAK-STAT	0.150077	1
biological_process	GO:0001656	metanephros development	0.151632	1
biological_process	GO:0045132	meiotic chromosome segregation	0.151632	1
biological_process	GO:0045185	maintenance of protein location	0.151632	1
biological_process	GO:0040013	negative regulation of locomotion	0.152445	1
cellular_component	GO:0031252	cell leading edge	0.152832	1
biological_process	GO:0015914	phospholipid transport	0.153185	1
biological_process	GO:0051899	membrane depolarization	0.153185	1
biological_process	GO:0080135	regulation of cellular response to stress	0.153249	1
biological_process	GO:0045765	regulation of angiogenesis	0.153715	1
molecular_function	GO:0004857	enzyme inhibitor activity	0.154316	1
biological_process	GO:0051271	negative regulation of cellular component movement	0.154351	1
biological_process	GO:1904894	positive regulation of receptor signaling pathway via STAT	0.154735	1
biological_process	GO:2000117	negative regulation of cysteine-type endopeptidase activity	0.154735	1
cellular_component	GO:0098805	whole membrane	0.155425	1
biological_process	GO:0007589	body fluid secretion	0.156282	1
biological_process	GO:0032092	positive regulation of protein binding	0.156282	1
biological_process	GO:0072080	nephron tubule development	0.156282	1
biological_process	GO:1901184	regulation of ERBB signaling pathway	0.156282	1
cellular_component	GO:0000794	condensed nuclear chromosome	0.157422	1
cellular_component	GO:0016605	PML body	0.157422	1
biological_process	GO:0070201	regulation of establishment of protein localization	0.157609	1
biological_process	GO:0060993	kidney morphogenesis	0.157826	1
biological_process	GO:0070167	regulation of biomineral tissue development	0.157826	1
biological_process	GO:0110149	regulation of biomineralization	0.157826	1
molecular_function	GO:0004842	ubiquitin-protein transferase activity	0.15889	1
biological_process	GO:0002702	positive regulation of production of molecular mediator of immune response	0.159367	1
biological_process	GO:0061326	renal tubule development	0.159367	1
biological_process	GO:0090087	regulation of peptide transport	0.159804	1
biological_process	GO:0032755	positive regulation of interleukin-6 production	0.160906	1
biological_process	GO:0010596	negative regulation of endothelial cell migration	0.162442	1
biological_process	GO:0051591	response to cAMP	0.162442	1
biological_process	GO:0006401	RNA catabolic process	0.162665	1
biological_process	GO:0001503	ossification	0.163308	1
molecular_function	GO:0019208	phosphatase regulator activity	0.164457	1
biological_process	GO:0044257	cellular protein catabolic process	0.165112	1
biological_process	GO:0010467	gene expression	0.165542	1
cellular_component	GO:0000777	condensed chromosome kinetochore	0.166147	1
biological_process	GO:0048878	chemical homeostasis	0.168207	1
biological_process	GO:2001233	regulation of apoptotic signaling pathway	0.168471	1
biological_process	GO:0032649	regulation of interferon-gamma production	0.168559	1
biological_process	GO:0048661	positive regulation of smooth muscle cell proliferation	0.168559	1
molecular_function	GO:0000977	RNA polymerase II regulatory region sequence-specific DNA binding	0.168722	1
molecular_function	GO:0001012	RNA polymerase II regulatory region DNA binding	0.168722	1
biological_process	GO:0002367	cytokine production involved in immune response	0.170081	1
biological_process	GO:0015031	protein transport	0.170954	1
biological_process	GO:0007229	integrin-mediated signaling pathway	0.171601	1
biological_process	GO:0032091	negative regulation of protein binding	0.171601	1
molecular_function	GO:0016787	hydrolase activity	0.171813	1
cellular_component	GO:1902911	protein kinase complex	0.171915	1
biological_process	GO:0071887	leukocyte apoptotic process	0.173118	1
biological_process	GO:2001237	negative regulation of extrinsic apoptotic signaling pathway	0.173118	1
biological_process	GO:0007009	plasma membrane organization	0.174632	1
molecular_function	GO:0019787	ubiquitin-like protein transferase activity	0.175435	1
biological_process	GO:0007041	lysosomal transport	0.176143	1
cellular_component	GO:0022626	cytosolic ribosome	0.176215	1
biological_process	GO:0030330	DNA damage response, signal transduction by p53 class mediator	0.177652	1
biological_process	GO:0048524	positive regulation of viral process	0.177652	1
biological_process	GO:1901342	regulation of vasculature development	0.178882	1
biological_process	GO:0002526	acute inflammatory response	0.179159	1
biological_process	GO:0072009	nephron epithelium development	0.180662	1
biological_process	GO:0015833	peptide transport	0.180847	1
biological_process	GO:0051276	chromosome organization	0.183064	1
cellular_component	GO:0000779	condensed chromosome, centromeric region	0.184751	1
biological_process	GO:1903828	negative regulation of cellular protein localization	0.185157	1
biological_process	GO:0032609	interferon-gamma production	0.18665	1
biological_process	GO:0007127	meiosis I	0.18814	1
biological_process	GO:0010633	negative regulation of epithelial cell migration	0.18814	1
biological_process	GO:0030282	bone mineralization	0.18814	1
biological_process	GO:0009967	positive regulation of signal transduction	0.188342	1
biological_process	GO:0042886	amide transport	0.189561	1
biological_process	GO:0030449	regulation of complement activation	0.189627	1
cellular_component	GO:0005635	nuclear envelope	0.190299	1
molecular_function	GO:0008238	exopeptidase activity	0.190706	1
biological_process	GO:2000736	regulation of stem cell differentiation	0.191112	1
molecular_function	GO:0000976	transcription regulatory region sequence-specific DNA binding	0.191162	1
cellular_component	GO:0000784	nuclear chromosome, telomeric region	0.191799	1
cellular_component	GO:0005923	bicellular tight junction	0.191799	1
molecular_function	GO:0004540	ribonuclease activity	0.192225	1
biological_process	GO:0002761	regulation of myeloid leukocyte differentiation	0.192594	1
biological_process	GO:0043666	regulation of phosphoprotein phosphatase activity	0.192594	1
biological_process	GO:1901222	regulation of NIK/NF-kappaB signaling	0.192594	1
biological_process	GO:2000026	regulation of multicellular organismal development	0.192696	1
biological_process	GO:0042127	regulation of cell population proliferation	0.193143	1
molecular_function	GO:0008270	zinc ion binding	0.193546	1
molecular_function	GO:0044212	transcription regulatory region DNA binding	0.193546	1
molecular_function	GO:0001067	regulatory region nucleic acid binding	0.194024	1
biological_process	GO:0007173	epidermal growth factor receptor signaling pathway	0.195551	1
biological_process	GO:0061982	meiosis I cell cycle process	0.195551	1
biological_process	GO:0048285	organelle fission	0.196678	1
biological_process	GO:0051186	cofactor metabolic process	0.196678	1
biological_process	GO:0045184	establishment of protein localization	0.197005	1
molecular_function	GO:0001228	DNA-binding transcription activator activity, RNA polymerase II-specific	0.197009	1
biological_process	GO:0000184	nuclear-transcribed mRNA catabolic process, nonsense-mediated decay	0.197026	1
biological_process	GO:0072089	stem cell proliferation	0.197026	1
molecular_function	GO:0001216	DNA-binding transcription activator activity	0.197689	1
biological_process	GO:0015748	organophosphate ester transport	0.198497	1
biological_process	GO:0030968	endoplasmic reticulum unfolded protein response	0.198497	1
biological_process	GO:0046718	viral entry into host cell	0.198497	1
cellular_component	GO:0070160	tight junction	0.198787	1
cellular_component	GO:0010008	endosome membrane	0.199715	1
biological_process	GO:0048522	positive regulation of cellular process	0.20084	1
biological_process	GO:0042089	cytokine biosynthetic process	0.201433	1
biological_process	GO:0008637	apoptotic mitochondrial changes	0.202897	1
biological_process	GO:0042107	cytokine metabolic process	0.202897	1
biological_process	GO:0051101	regulation of DNA binding	0.202897	1
biological_process	GO:0009893	positive regulation of metabolic process	0.204245	1
biological_process	GO:0045667	regulation of osteoblast differentiation	0.205817	1
biological_process	GO:0051346	negative regulation of hydrolase activity	0.206	1
cellular_component	GO:0000776	kinetochore	0.208473	1
biological_process	GO:0033036	macromolecule localization	0.208621	1
biological_process	GO:0050793	regulation of developmental process	0.211614	1
biological_process	GO:0002443	leukocyte mediated immunity	0.212714	1
cellular_component	GO:0015629	actin cytoskeleton	0.214266	1
molecular_function	GO:1990837	sequence-specific double-stranded DNA binding	0.214851	1
biological_process	GO:0051241	negative regulation of multicellular organismal process	0.215628	1
biological_process	GO:0042770	signal transduction in response to DNA damage	0.215955	1
molecular_function	GO:0017124	SH3 domain binding	0.216155	1
biological_process	GO:0000724	double-strand break repair via homologous recombination	0.217394	1
biological_process	GO:0002920	regulation of humoral immune response	0.217394	1
biological_process	GO:0044409	entry into host	0.217394	1
biological_process	GO:0046683	response to organophosphorus	0.217394	1
molecular_function	GO:0005319	lipid transporter activity	0.217627	1
biological_process	GO:0000725	recombinational repair	0.218829	1
molecular_function	GO:0005178	integrin binding	0.219097	1
cellular_component	GO:0043296	apical junction complex	0.219403	1
biological_process	GO:0002705	positive regulation of leukocyte mediated immunity	0.220262	1
biological_process	GO:0007292	female gamete generation	0.220262	1
biological_process	GO:0006958	complement activation, classical pathway	0.221692	1
biological_process	GO:0046425	regulation of receptor signaling pathway via JAK-STAT	0.221692	1
molecular_function	GO:0004713	protein tyrosine kinase activity	0.222029	1
molecular_function	GO:0070851	growth factor receptor binding	0.222029	1
biological_process	GO:0008584	male gonad development	0.22312	1
biological_process	GO:0002700	regulation of production of molecular mediator of immune response	0.224546	1
biological_process	GO:0035304	regulation of protein dephosphorylation	0.224546	1
biological_process	GO:0046546	development of primary male sexual characteristics	0.224546	1
biological_process	GO:0050715	positive regulation of cytokine secretion	0.224546	1
cellular_component	GO:0072562	blood microparticle	0.224813	1
biological_process	GO:0034620	cellular response to unfolded protein	0.225968	1
biological_process	GO:0072073	kidney epithelium development	0.225968	1
cellular_component	GO:0031901	early endosome membrane	0.227504	1
biological_process	GO:0038127	ERBB signaling pathway	0.228806	1
biological_process	GO:0072006	nephron development	0.228806	1
biological_process	GO:0031667	response to nutrient levels	0.230193	1
biological_process	GO:0007034	vacuolar transport	0.230221	1
biological_process	GO:0030879	mammary gland development	0.230221	1
molecular_function	GO:0019903	protein phosphatase binding	0.23076	1
biological_process	GO:0050878	regulation of body fluid levels	0.231545	1
molecular_function	GO:0045182	translation regulator activity	0.232206	1
biological_process	GO:0002431	Fc receptor mediated stimulatory signaling pathway	0.233044	1
cellular_component	GO:0019866	organelle inner membrane	0.233406	1
biological_process	GO:0002224	toll-like receptor signaling pathway	0.234452	1
biological_process	GO:0042542	response to hydrogen peroxide	0.234452	1
biological_process	GO:1904892	regulation of receptor signaling pathway via STAT	0.234452	1
molecular_function	GO:0140030	modification-dependent protein binding	0.236528	1
molecular_function	GO:0050839	cell adhesion molecule binding	0.238285	1
biological_process	GO:0009267	cellular response to starvation	0.23866	1
biological_process	GO:0014074	response to purine-containing compound	0.23866	1
biological_process	GO:0030163	protein catabolic process	0.239339	1
cellular_component	GO:0000781	chromosome, telomeric region	0.239503	1
biological_process	GO:0044087	regulation of cellular component biogenesis	0.239829	1
biological_process	GO:0002455	humoral immune response mediated by circulating immunoglobulin	0.240057	1
biological_process	GO:0008104	protein localization	0.242026	1
biological_process	GO:0007286	spermatid development	0.242845	1
biological_process	GO:0032675	regulation of interleukin-6 production	0.242845	1
biological_process	GO:0019538	protein metabolic process	0.242885	1
biological_process	GO:0030168	platelet activation	0.244235	1
biological_process	GO:0033365	protein localization to organelle	0.245234	1
biological_process	GO:0061025	membrane fusion	0.245623	1
biological_process	GO:0090501	RNA phosphodiester bond hydrolysis	0.245623	1
molecular_function	GO:0035257	nuclear hormone receptor binding	0.247938	1
biological_process	GO:0030856	regulation of epithelial cell differentiation	0.248391	1
biological_process	GO:0030334	regulation of cell migration	0.248685	1
biological_process	GO:1902531	regulation of intracellular signal transduction	0.249117	1
biological_process	GO:0007005	mitochondrion organization	0.249165	1
biological_process	GO:0031399	regulation of protein modification process	0.249469	1
biological_process	GO:0048515	spermatid differentiation	0.251149	1
biological_process	GO:0009991	response to extracellular stimulus	0.251882	1
molecular_function	GO:0008047	enzyme activator activity	0.252187	1
biological_process	GO:0045595	regulation of cell differentiation	0.253341	1
biological_process	GO:0002819	regulation of adaptive immune response	0.253898	1
biological_process	GO:0032680	regulation of tumor necrosis factor production	0.253898	1
biological_process	GO:0046661	male sex differentiation	0.253898	1
biological_process	GO:0034655	nucleobase-containing compound catabolic process	0.253921	1
biological_process	GO:0071704	organic substance metabolic process	0.25487	1
biological_process	GO:0032635	interleukin-6 production	0.255268	1
biological_process	GO:0035967	cellular response to topologically incorrect protein	0.255268	1
biological_process	GO:0032879	regulation of localization	0.255906	1
biological_process	GO:0000723	telomere maintenance	0.256636	1
biological_process	GO:0043085	positive regulation of catalytic activity	0.257091	1
biological_process	GO:0031214	biomineral tissue development	0.258002	1
biological_process	GO:0032640	tumor necrosis factor production	0.258002	1
biological_process	GO:0110148	biomineralization	0.258002	1
biological_process	GO:1903555	regulation of tumor necrosis factor superfamily cytokine production	0.258002	1
biological_process	GO:0014070	response to organic cyclic compound	0.258591	1
cellular_component	GO:0030496	midbody	0.2591	1
molecular_function	GO:0004252	serine-type endopeptidase activity	0.259183	1
biological_process	GO:0009117	nucleotide metabolic process	0.259361	1
biological_process	GO:0031497	chromatin assembly	0.260725	1
biological_process	GO:0050680	negative regulation of epithelial cell proliferation	0.260725	1
biological_process	GO:0033209	tumor necrosis factor-mediated signaling pathway	0.26344	1
biological_process	GO:0006753	nucleoside phosphate metabolic process	0.264124	1
biological_process	GO:0071702	organic substance transport	0.264717	1
biological_process	GO:0071706	tumor necrosis factor superfamily cytokine production	0.264793	1
biological_process	GO:0048660	regulation of smooth muscle cell proliferation	0.266144	1
biological_process	GO:0048659	smooth muscle cell proliferation	0.268839	1
biological_process	GO:0045597	positive regulation of cell differentiation	0.269059	1
biological_process	GO:0032874	positive regulation of stress-activated MAPK cascade	0.270183	1
biological_process	GO:0140013	meiotic nuclear division	0.270183	1
molecular_function	GO:0003682	chromatin binding	0.271006	1
biological_process	GO:0016525	negative regulation of angiogenesis	0.271524	1
biological_process	GO:0070304	positive regulation of stress-activated protein kinase signaling cascade	0.271524	1
biological_process	GO:0002253	activation of immune response	0.272293	1
biological_process	GO:0006956	complement activation	0.2742	1
biological_process	GO:0010921	regulation of phosphatase activity	0.2742	1
biological_process	GO:0032200	telomere organization	0.2742	1
biological_process	GO:0120032	regulation of plasma membrane bounded cell projection assembly	0.2742	1
biological_process	GO:2000181	negative regulation of blood vessel morphogenesis	0.2742	1
biological_process	GO:0001936	regulation of endothelial cell proliferation	0.275534	1
biological_process	GO:0006986	response to unfolded protein	0.275534	1
biological_process	GO:0019083	viral transcription	0.276866	1
biological_process	GO:0048469	cell maturation	0.276866	1
biological_process	GO:0060491	regulation of cell projection assembly	0.276866	1
biological_process	GO:0040011	locomotion	0.276921	1
biological_process	GO:2000145	regulation of cell motility	0.279585	1
cellular_component	GO:0098588	bounding membrane of organelle	0.280691	1
biological_process	GO:1905330	regulation of morphogenesis of an epithelium	0.280848	1
molecular_function	GO:0003712	transcription coregulator activity	0.282167	1
biological_process	GO:0071705	nitrogen compound transport	0.283451	1
biological_process	GO:0009566	fertilization	0.28349	1
biological_process	GO:1902533	positive regulation of intracellular signal transduction	0.284112	1
cellular_component	GO:0000775	chromosome, centromeric region	0.284469	1
biological_process	GO:0038061	NIK/NF-kappaB signaling	0.284808	1
biological_process	GO:0043123	positive regulation of I-kappaB kinase/NF-kappaB signaling	0.284808	1
biological_process	GO:0046700	heterocycle catabolic process	0.285909	1
biological_process	GO:0044270	cellular nitrogen compound catabolic process	0.286589	1
biological_process	GO:1902275	regulation of chromatin organization	0.287436	1
molecular_function	GO:0008237	metallopeptidase activity	0.287931	1
molecular_function	GO:0008236	serine-type peptidase activity	0.289273	1
biological_process	GO:0001525	angiogenesis	0.289992	1
biological_process	GO:1901343	negative regulation of vasculature development	0.290055	1
biological_process	GO:0019637	organophosphate metabolic process	0.29016	1
biological_process	GO:0006575	cellular modified amino acid metabolic process	0.291361	1
biological_process	GO:0031345	negative regulation of cell projection organization	0.291361	1
biological_process	GO:1903046	meiotic cell cycle process	0.291361	1
biological_process	GO:0000819	sister chromatid segregation	0.292665	1
biological_process	GO:0009306	protein secretion	0.292713	1
molecular_function	GO:0019902	phosphatase binding	0.293283	1
molecular_function	GO:0051427	hormone receptor binding	0.293283	1
biological_process	GO:0035592	establishment of protein localization to extracellular region	0.293393	1
molecular_function	GO:0016825	hydrolase activity, acting on acid phosphorus-nitrogen bonds	0.294615	1
molecular_function	GO:0017171	serine hydrolase activity	0.294615	1
biological_process	GO:0001935	endothelial cell proliferation	0.295265	1
biological_process	GO:0006333	chromatin assembly or disassembly	0.295265	1
biological_process	GO:0019080	viral gene expression	0.295265	1
biological_process	GO:0042594	response to starvation	0.295265	1
biological_process	GO:0043112	receptor metabolic process	0.296561	1
biological_process	GO:0050731	positive regulation of peptidyl-tyrosine phosphorylation	0.296561	1
biological_process	GO:0019439	aromatic compound catabolic process	0.297473	1
biological_process	GO:0006413	translational initiation	0.297856	1
biological_process	GO:0051224	negative regulation of protein transport	0.297856	1
biological_process	GO:0071692	protein localization to extracellular region	0.298153	1
cellular_component	GO:0043232	intracellular non-membrane-bounded organelle	0.298799	1
biological_process	GO:0040012	regulation of locomotion	0.300775	1
cellular_component	GO:0043228	non-membrane-bounded organelle	0.301015	1
biological_process	GO:1904950	negative regulation of establishment of protein localization	0.30301	1
biological_process	GO:0035966	response to topologically incorrect protein	0.305573	1
biological_process	GO:0008283	cell population proliferation	0.306916	1
molecular_function	GO:0070011	peptidase activity, acting on L-amino acid peptides	0.307941	1
biological_process	GO:0002573	myeloid leukocyte differentiation	0.311942	1
biological_process	GO:0006006	glucose metabolic process	0.311942	1
biological_process	GO:0006511	ubiquitin-dependent protein catabolic process	0.312409	1
biological_process	GO:0002703	regulation of leukocyte mediated immunity	0.313209	1
biological_process	GO:0002790	peptide secretion	0.315119	1
biological_process	GO:0000956	nuclear-transcribed mRNA catabolic process	0.315736	1
biological_process	GO:0017148	negative regulation of translation	0.318254	1
biological_process	GO:0035303	regulation of dephosphorylation	0.318254	1
biological_process	GO:0055086	nucleobase-containing small molecule metabolic process	0.318505	1
molecular_function	GO:0004518	nuclease activity	0.319462	1
biological_process	GO:0006323	DNA packaging	0.319509	1
biological_process	GO:0009612	response to mechanical stimulus	0.319509	1
biological_process	GO:0050707	regulation of cytokine secretion	0.319509	1
biological_process	GO:1901361	organic cyclic compound catabolic process	0.319858	1
cellular_component	GO:0000793	condensed chromosome	0.320948	1
biological_process	GO:0051270	regulation of cellular component movement	0.322598	1
molecular_function	GO:0008233	peptidase activity	0.324593	1
biological_process	GO:0043281	regulation of cysteine-type endopeptidase activity involved in apoptotic process	0.325754	1
biological_process	GO:0016485	protein processing	0.326996	1
biological_process	GO:0032869	cellular response to insulin stimulus	0.326996	1
biological_process	GO:0008406	gonad development	0.328236	1
biological_process	GO:0046474	glycerophospholipid biosynthetic process	0.328236	1
biological_process	GO:0016477	cell migration	0.328976	1
biological_process	GO:0035295	tube development	0.329209	1
biological_process	GO:0007584	response to nutrient	0.330709	1
biological_process	GO:0051651	maintenance of location in cell	0.330709	1
biological_process	GO:0048762	mesenchymal cell differentiation	0.331942	1
biological_process	GO:0051347	positive regulation of transferase activity	0.333361	1
biological_process	GO:0045137	development of primary sexual characteristics	0.335629	1
biological_process	GO:1901564	organonitrogen compound metabolic process	0.335677	1
cellular_component	GO:0005802	trans-Golgi network	0.33619	1
biological_process	GO:0001649	osteoblast differentiation	0.338076	1
biological_process	GO:0034249	negative regulation of cellular amide metabolic process	0.339296	1
biological_process	GO:0006464	cellular protein modification process	0.339739	1
biological_process	GO:0036211	protein modification process	0.339739	1
biological_process	GO:1901698	response to nitrogen compound	0.341422	1
biological_process	GO:0010594	regulation of endothelial cell migration	0.342943	1
biological_process	GO:2001234	negative regulation of apoptotic signaling pathway	0.344155	1
molecular_function	GO:0043565	sequence-specific DNA binding	0.34435	1
biological_process	GO:0000302	response to reactive oxygen species	0.346571	1
biological_process	GO:0071695	anatomical structure maturation	0.346571	1
molecular_function	GO:0008134	transcription factor binding	0.348034	1
biological_process	GO:0046777	protein autophosphorylation	0.350179	1
biological_process	GO:0002250	adaptive immune response	0.350816	1
biological_process	GO:0031669	cellular response to nutrient levels	0.352574	1
biological_process	GO:0032872	regulation of stress-activated MAPK cascade	0.352574	1
cellular_component	GO:0045111	intermediate filament cytoskeleton	0.353363	1
biological_process	GO:0048514	blood vessel morphogenesis	0.35349	1
biological_process	GO:0033002	muscle cell proliferation	0.35496	1
biological_process	GO:0070302	regulation of stress-activated protein kinase signaling cascade	0.35496	1
biological_process	GO:2000116	regulation of cysteine-type endopeptidase activity	0.35496	1
biological_process	GO:0042593	glucose homeostasis	0.357338	1
biological_process	GO:0033500	carbohydrate homeostasis	0.358524	1
biological_process	GO:0032268	regulation of cellular protein metabolic process	0.358591	1
molecular_function	GO:0003714	transcription corepressor activity	0.360615	1
biological_process	GO:0019318	hexose metabolic process	0.360889	1
cellular_component	GO:0061695	transferase complex, transferring phosphorus-containing groups	0.362345	1
biological_process	GO:1901575	organic substance catabolic process	0.362376	1
biological_process	GO:0051321	meiotic cell cycle	0.366764	1
biological_process	GO:0010951	negative regulation of endopeptidase activity	0.367933	1
biological_process	GO:0045017	glycerolipid biosynthetic process	0.3691	1
molecular_function	GO:0008017	microtubule binding	0.370222	1
biological_process	GO:2000027	regulation of animal organ morphogenesis	0.371427	1
biological_process	GO:0023061	signal release	0.37211	1
biological_process	GO:0044237	cellular metabolic process	0.374723	1
biological_process	GO:0050730	regulation of peptidyl-tyrosine phosphorylation	0.374902	1
biological_process	GO:0048863	stem cell differentiation	0.376056	1
cellular_component	GO:0005840	ribosome	0.376683	1
biological_process	GO:0043406	positive regulation of MAP kinase activity	0.377208	1
cellular_component	GO:0110165	cellular anatomical entity	0.378479	1
biological_process	GO:0006928	movement of cell or subcellular component	0.379429	1
biological_process	GO:0008654	phospholipid biosynthetic process	0.379506	1
molecular_function	GO:0005509	calcium ion binding	0.380711	1
biological_process	GO:0008152	metabolic process	0.38118	1
biological_process	GO:0007281	germ cell development	0.381796	1
biological_process	GO:0010466	negative regulation of peptidase activity	0.381796	1
biological_process	GO:0098813	nuclear chromosome segregation	0.381796	1
molecular_function	GO:0019904	protein domain specific binding	0.382734	1
cellular_component	GO:0070161	anchoring junction	0.384118	1
biological_process	GO:0072331	signal transduction by p53 class mediator	0.387485	1
biological_process	GO:0031668	cellular response to extracellular stimulus	0.388616	1
biological_process	GO:0050714	positive regulation of protein secretion	0.388616	1
biological_process	GO:0007548	sex differentiation	0.390874	1
biological_process	GO:0044248	cellular catabolic process	0.391955	1
biological_process	GO:0032868	response to insulin	0.393123	1
biological_process	GO:1902105	regulation of leukocyte differentiation	0.393123	1
cellular_component	GO:0031090	organelle membrane	0.394854	1
biological_process	GO:0043542	endothelial cell migration	0.395364	1
biological_process	GO:0048870	cell motility	0.396947	1
biological_process	GO:0051674	localization of cell	0.396947	1
biological_process	GO:0007411	axon guidance	0.397597	1
biological_process	GO:0097485	neuron projection guidance	0.39871	1
biological_process	GO:0001822	kidney development	0.399822	1
biological_process	GO:0043412	macromolecule modification	0.400787	1
biological_process	GO:0060485	mesenchyme development	0.400931	1
molecular_function	GO:0005096	GTPase activator activity	0.401623	1
biological_process	GO:0016579	protein deubiquitination	0.405349	1
biological_process	GO:0051258	protein polymerization	0.405349	1
biological_process	GO:0001568	blood vessel development	0.406158	1
biological_process	GO:0021700	developmental maturation	0.406449	1
biological_process	GO:0072593	reactive oxygen species metabolic process	0.406449	1
biological_process	GO:0034976	response to endoplasmic reticulum stress	0.407547	1
biological_process	GO:0051348	negative regulation of transferase activity	0.407547	1
biological_process	GO:0051604	protein maturation	0.407547	1
biological_process	GO:0002440	production of molecular mediator of immune response	0.408642	1
biological_process	GO:0051403	stress-activated MAPK cascade	0.408642	1
biological_process	GO:0051345	positive regulation of hydrolase activity	0.408744	1
molecular_function	GO:0001664	G protein-coupled receptor binding	0.409513	1
biological_process	GO:0005996	monosaccharide metabolic process	0.409736	1
biological_process	GO:0002793	positive regulation of peptide secretion	0.410828	1
biological_process	GO:0097193	intrinsic apoptotic signaling pathway	0.411917	1
biological_process	GO:0010632	regulation of epithelial cell migration	0.414091	1
biological_process	GO:0071356	cellular response to tumor necrosis factor	0.414091	1
biological_process	GO:0006310	DNA recombination	0.415175	1
molecular_function	GO:0005126	cytokine receptor binding	0.416195	1
biological_process	GO:0072001	renal system development	0.416257	1
biological_process	GO:0051246	regulation of protein metabolic process	0.417426	1
molecular_function	GO:0031625	ubiquitin protein ligase binding	0.420609	1
cellular_component	GO:0045121	membrane raft	0.421915	1
biological_process	GO:0070646	protein modification by small protein removal	0.422708	1
cellular_component	GO:0098857	membrane microdomain	0.422928	1
biological_process	GO:1901565	organonitrogen compound catabolic process	0.423285	1
biological_process	GO:0090305	nucleic acid phosphodiester bond hydrolysis	0.425907	1
biological_process	GO:0001944	vasculature development	0.426072	1
biological_process	GO:0006325	chromatin organization	0.431159	1
biological_process	GO:0072358	cardiovascular system development	0.431794	1
cellular_component	GO:0098589	membrane region	0.434951	1
molecular_function	GO:0030695	GTPase regulator activity	0.435805	1
biological_process	GO:0034612	response to tumor necrosis factor	0.436449	1
biological_process	GO:0051046	regulation of secretion	0.438119	1
biological_process	GO:0031098	stress-activated protein kinase signaling cascade	0.439574	1
biological_process	GO:0051235	maintenance of location	0.439574	1
molecular_function	GO:0098772	molecular function regulator	0.440667	1
biological_process	GO:0006650	glycerophospholipid metabolic process	0.443715	1
biological_process	GO:1901566	organonitrogen compound biosynthetic process	0.444139	1
biological_process	GO:0006470	protein dephosphorylation	0.445775	1
biological_process	GO:0007059	chromosome segregation	0.445775	1
biological_process	GO:0071375	cellular response to peptide hormone stimulus	0.445775	1
cellular_component	GO:0005730	nucleolus	0.447818	1
biological_process	GO:0051049	regulation of transport	0.450881	1
molecular_function	GO:0003713	transcription coactivator activity	0.451658	1
biological_process	GO:0046677	response to antibiotic	0.451909	1
biological_process	GO:0071103	DNA conformation change	0.451909	1
biological_process	GO:0001655	urogenital system development	0.454951	1
biological_process	GO:0042742	defense response to bacterium	0.454951	1
cellular_component	GO:0005769	early endosome	0.456364	1
molecular_function	GO:0046983	protein dimerization activity	0.456513	1
biological_process	GO:0032147	activation of protein kinase activity	0.457977	1
biological_process	GO:0071902	positive regulation of protein serine/threonine kinase activity	0.458982	1
cellular_component	GO:0005765	lysosomal membrane	0.460172	1
biological_process	GO:0007596	blood coagulation	0.460987	1
cellular_component	GO:0098852	lytic vacuole membrane	0.46112	1
biological_process	GO:0043405	regulation of MAP kinase activity	0.461986	1
biological_process	GO:0051056	regulation of small GTPase mediated signal transduction	0.462984	1
biological_process	GO:0034613	cellular protein localization	0.463464	1
biological_process	GO:0065008	regulation of biological quality	0.463874	1
biological_process	GO:0071496	cellular response to external stimulus	0.46398	1
molecular_function	GO:0045296	cadherin binding	0.464028	1
cellular_component	GO:0098791	Golgi subcompartment	0.464895	1
biological_process	GO:0007599	hemostasis	0.465967	1
cellular_component	GO:0005768	endosome	0.466705	1
biological_process	GO:0033044	regulation of chromosome organization	0.466957	1
biological_process	GO:0050817	coagulation	0.466957	1
biological_process	GO:0070727	cellular macromolecule localization	0.467641	1
molecular_function	GO:0015631	tubulin binding	0.469102	1
biological_process	GO:0010631	epithelial cell migration	0.476766	1
molecular_function	GO:0060589	nucleoside-triphosphatase regulator activity	0.477124	1
biological_process	GO:0061024	membrane organization	0.477125	1
biological_process	GO:0090132	epithelium migration	0.479674	1
biological_process	GO:0006959	humoral immune response	0.48064	1
cellular_component	GO:0000790	nuclear chromatin	0.480657	1
molecular_function	GO:0042803	protein homodimerization activity	0.480682	1
biological_process	GO:0045861	negative regulation of proteolysis	0.482567	1
biological_process	GO:0051094	positive regulation of developmental process	0.483034	1
cellular_component	GO:0031984	organelle subcompartment	0.484299	1
biological_process	GO:0022412	cellular process involved in reproduction in multicellular organism	0.485444	1
biological_process	GO:0090130	tissue migration	0.485444	1
biological_process	GO:0048513	animal organ development	0.486164	1
biological_process	GO:0031331	positive regulation of cellular catabolic process	0.486399	1
cellular_component	GO:0045177	apical part of cell	0.487917	1
biological_process	GO:0006402	mRNA catabolic process	0.488305	1
biological_process	GO:0050678	regulation of epithelial cell proliferation	0.501456	1
biological_process	GO:0006869	lipid transport	0.503307	1
biological_process	GO:0044267	cellular protein metabolic process	0.503576	1
biological_process	GO:0035239	tube morphogenesis	0.504619	1
molecular_function	GO:0005525	GTP binding	0.506171	1
cellular_component	GO:0005925	focal adhesion	0.50651	1
cellular_component	GO:0062023	collagen-containing extracellular matrix	0.507378	1
biological_process	GO:1901653	cellular response to peptide	0.507907	1
molecular_function	GO:0032550	purine ribonucleoside binding	0.509924	1
cellular_component	GO:0012505	endomembrane system	0.510621	1
cellular_component	GO:0005794	Golgi apparatus	0.511063	1
cellular_component	GO:0005774	vacuolar membrane	0.51256	1
cellular_component	GO:0030055	cell-substrate junction	0.51256	1
molecular_function	GO:0001883	purine nucleoside binding	0.51272	1
molecular_function	GO:0032549	ribonucleoside binding	0.51272	1
cellular_component	GO:0005911	cell-cell junction	0.515985	1
molecular_function	GO:0001882	nucleoside binding	0.519185	1
biological_process	GO:0030154	cell differentiation	0.521072	1
biological_process	GO:1903532	positive regulation of secretion by cell	0.524127	1
molecular_function	GO:0019001	guanyl nucleotide binding	0.52466	1
molecular_function	GO:0032561	guanyl ribonucleotide binding	0.52466	1
biological_process	GO:0043547	positive regulation of GTPase activity	0.525897	1
biological_process	GO:0009056	catabolic process	0.527165	1
biological_process	GO:0000280	nuclear division	0.527661	1
biological_process	GO:0019216	regulation of lipid metabolic process	0.530294	1
biological_process	GO:0046486	glycerolipid metabolic process	0.533783	1
biological_process	GO:0010876	lipid localization	0.534651	1
biological_process	GO:0051338	regulation of transferase activity	0.535755	1
biological_process	GO:0043161	proteasome-mediated ubiquitin-dependent protein catabolic process	0.538109	1
biological_process	GO:0006417	regulation of translation	0.542395	1
biological_process	GO:0009896	positive regulation of catabolic process	0.543248	1
biological_process	GO:0052548	regulation of endopeptidase activity	0.543248	1
biological_process	GO:0048869	cellular developmental process	0.544561	1
biological_process	GO:0051047	positive regulation of secretion	0.545797	1
biological_process	GO:0043254	regulation of protein-containing complex assembly	0.546644	1
biological_process	GO:0006644	phospholipid metabolic process	0.547489	1
biological_process	GO:0048608	reproductive structure development	0.548332	1
biological_process	GO:0042391	regulation of membrane potential	0.550853	1
biological_process	GO:0048732	gland development	0.550853	1
biological_process	GO:0050673	epithelial cell proliferation	0.550853	1
biological_process	GO:0061458	reproductive system development	0.550853	1
biological_process	GO:0043434	response to peptide hormone	0.552527	1
biological_process	GO:0060249	anatomical structure homeostasis	0.553361	1
molecular_function	GO:0004175	endopeptidase activity	0.553709	1
biological_process	GO:0010256	endomembrane system organization	0.554194	1
molecular_function	GO:0017016	Ras GTPase binding	0.555413	1
biological_process	GO:0051222	positive regulation of protein transport	0.555855	1
biological_process	GO:0048731	system development	0.558424	1
biological_process	GO:0001934	positive regulation of protein phosphorylation	0.55963	1
cellular_component	GO:0005789	endoplasmic reticulum membrane	0.561149	1
cellular_component	GO:0005743	mitochondrial inner membrane	0.562327	1
molecular_function	GO:0004674	protein serine/threonine kinase activity	0.56384	1
biological_process	GO:0006979	response to oxidative stress	0.564885	1
biological_process	GO:0052547	regulation of peptidase activity	0.565697	1
molecular_function	GO:0031267	small GTPase binding	0.567167	1
biological_process	GO:0016570	histone modification	0.567317	1
biological_process	GO:1904951	positive regulation of establishment of protein localization	0.56893	1
cellular_component	GO:0042175	nuclear outer membrane-endoplasmic reticulum membrane network	0.572388	1
biological_process	GO:0001667	ameboidal-type cell migration	0.573737	1
biological_process	GO:0007409	axonogenesis	0.578491	1
biological_process	GO:0050708	regulation of protein secretion	0.581632	1
biological_process	GO:0002429	immune response-activating cell surface receptor signaling pathway	0.582413	1
biological_process	GO:0002757	immune response-activating signal transduction	0.582413	1
biological_process	GO:0016569	covalent chromatin modification	0.583194	1
biological_process	GO:0034248	regulation of cellular amide metabolic process	0.58475	1
biological_process	GO:0010498	proteasomal protein catabolic process	0.585526	1
biological_process	GO:0016311	dephosphorylation	0.5863	1
biological_process	GO:0042327	positive regulation of phosphorylation	0.58686	1
biological_process	GO:0043087	regulation of GTPase activity	0.587074	1
biological_process	GO:0046903	secretion	0.593189	1
molecular_function	GO:0005102	signaling receptor binding	0.594378	1
biological_process	GO:0051704	multi-organism process	0.595156	1
biological_process	GO:0015711	organic anion transport	0.599255	1
cellular_component	GO:0031012	extracellular matrix	0.601534	1
biological_process	GO:0002791	regulation of peptide secretion	0.60299	1
biological_process	GO:0034622	cellular protein-containing complex assembly	0.605866	1
biological_process	GO:0002768	immune response-regulating cell surface receptor signaling pathway	0.607427	1
biological_process	GO:0002764	immune response-regulating signaling pathway	0.609628	1
biological_process	GO:0061564	axon development	0.613269	1
biological_process	GO:0002521	leukocyte differentiation	0.613993	1
biological_process	GO:0071900	regulation of protein serine/threonine kinase activity	0.613993	1
cellular_component	GO:0016020	membrane	0.616888	1
biological_process	GO:1901652	response to peptide	0.617594	1
biological_process	GO:0051051	negative regulation of transport	0.619026	1
biological_process	GO:0010562	positive regulation of phosphorus metabolic process	0.622281	1
biological_process	GO:0045937	positive regulation of phosphate metabolic process	0.622281	1
biological_process	GO:0009636	response to toxic substance	0.625403	1
biological_process	GO:0045860	positive regulation of protein kinase activity	0.626105	1
cellular_component	GO:0000785	chromatin	0.626861	1
biological_process	GO:0002009	morphogenesis of an epithelium	0.629597	1
biological_process	GO:0022603	regulation of anatomical structure morphogenesis	0.630541	1
cellular_component	GO:0098590	plasma membrane region	0.631543	1
biological_process	GO:0007283	spermatogenesis	0.633745	1
biological_process	GO:0008015	blood circulation	0.633745	1
biological_process	GO:1902532	negative regulation of intracellular signal transduction	0.635118	1
biological_process	GO:0043410	positive regulation of MAPK cascade	0.635802	1
biological_process	GO:0046907	intracellular transport	0.637008	1
biological_process	GO:0010608	posttranscriptional regulation of gene expression	0.637242	1
biological_process	GO:0072359	circulatory system development	0.637242	1
biological_process	GO:0048646	anatomical structure formation involved in morphogenesis	0.639613	1
biological_process	GO:0002444	myeloid leukocyte mediated immunity	0.639883	1
biological_process	GO:0003013	circulatory system process	0.640559	1
molecular_function	GO:0051020	GTPase binding	0.641403	1
biological_process	GO:0120031	plasma membrane bounded cell projection assembly	0.641907	1
biological_process	GO:0006886	intracellular protein transport	0.642444	1
cellular_component	GO:0030425	dendrite	0.645613	1
biological_process	GO:0048232	male gamete generation	0.645921	1
biological_process	GO:0010035	response to inorganic substance	0.646586	1
cellular_component	GO:0097447	dendritic tree	0.646872	1
biological_process	GO:0042060	wound healing	0.648573	1
biological_process	GO:0030031	cell projection assembly	0.649891	1
biological_process	GO:0002694	regulation of leukocyte activation	0.652514	1
biological_process	GO:0007264	small GTPase mediated signal transduction	0.652514	1
biological_process	GO:0033674	positive regulation of kinase activity	0.653819	1
cellular_component	GO:0030424	axon	0.654335	1
biological_process	GO:0048667	cell morphogenesis involved in neuron differentiation	0.66027	1
biological_process	GO:0031401	positive regulation of protein modification process	0.668503	1
molecular_function	GO:0004672	protein kinase activity	0.674991	1
biological_process	GO:0018193	peptidyl-amino acid modification	0.678163	1
biological_process	GO:0050865	regulation of cell activation	0.679534	1
biological_process	GO:0005975	carbohydrate metabolic process	0.682541	1
biological_process	GO:0022607	cellular component assembly	0.685614	1
biological_process	GO:0006820	anion transport	0.694871	1
cellular_component	GO:0005764	lysosome	0.696001	1
cellular_component	GO:0000323	lytic vacuole	0.696544	1
biological_process	GO:0006935	chemotaxis	0.697166	1
biological_process	GO:0042330	taxis	0.698307	1
biological_process	GO:0048812	neuron projection morphogenesis	0.699444	1
biological_process	GO:0002274	myeloid leukocyte activation	0.701142	1
biological_process	GO:0009968	negative regulation of signal transduction	0.701356	1
biological_process	GO:0071417	cellular response to organonitrogen compound	0.702269	1
biological_process	GO:0120039	plasma membrane bounded cell projection morphogenesis	0.707289	1
biological_process	GO:0007275	multicellular organism development	0.707418	1
biological_process	GO:0048858	cell projection morphogenesis	0.709493	1
biological_process	GO:0044281	small molecule metabolic process	0.710676	1
biological_process	GO:0032501	multicellular organismal process	0.711157	1
biological_process	GO:0048729	tissue morphogenesis	0.711682	1
biological_process	GO:0120035	regulation of plasma membrane bounded cell projection organization	0.71277	1
biological_process	GO:0009611	response to wounding	0.716547	1
cellular_component	GO:0120025	plasma membrane bounded cell projection	0.718137	1
biological_process	GO:0031344	regulation of cell projection organization	0.718152	1
biological_process	GO:0032990	cell part morphogenesis	0.719747	1
biological_process	GO:0007276	gamete generation	0.726559	1
biological_process	GO:0032870	cellular response to hormone stimulus	0.727076	1
biological_process	GO:0008610	lipid biosynthetic process	0.731181	1
molecular_function	GO:0016773	phosphotransferase activity, alcohol group as acceptor	0.733775	1
cellular_component	GO:0000139	Golgi membrane	0.734687	1
biological_process	GO:0006412	translation	0.734723	1
biological_process	GO:0051129	negative regulation of cellular component organization	0.735225	1
cellular_component	GO:0070062	extracellular exosome	0.73652	1
biological_process	GO:0007169	transmembrane receptor protein tyrosine kinase signaling pathway	0.737225	1
biological_process	GO:0006629	lipid metabolic process	0.73754	1
biological_process	GO:0006996	organelle organization	0.737596	1
cellular_component	GO:0042995	cell projection	0.740973	1
biological_process	GO:0030162	regulation of proteolysis	0.742161	1
cellular_component	GO:1903561	extracellular vesicle	0.743325	1
cellular_component	GO:0005773	vacuole	0.744045	1
cellular_component	GO:0043230	extracellular organelle	0.744787	1
cellular_component	GO:0005856	cytoskeleton	0.745079	1
cellular_component	GO:0016604	nuclear body	0.745878	1
cellular_component	GO:1990234	transferase complex	0.746334	1
biological_process	GO:0043043	peptide biosynthetic process	0.747007	1
biological_process	GO:0000904	cell morphogenesis involved in differentiation	0.749397	1
biological_process	GO:0006954	inflammatory response	0.750347	1
biological_process	GO:0044085	cellular component biogenesis	0.75094	1
molecular_function	GO:0019900	kinase binding	0.751294	1
biological_process	GO:0045596	negative regulation of cell differentiation	0.754578	1
biological_process	GO:1903530	regulation of secretion by cell	0.755972	1
molecular_function	GO:0016788	hydrolase activity, acting on ester bonds	0.756566	1
biological_process	GO:0010648	negative regulation of cell communication	0.756861	1
biological_process	GO:0001932	regulation of protein phosphorylation	0.758244	1
biological_process	GO:0023057	negative regulation of signaling	0.758244	1
biological_process	GO:0043408	regulation of MAPK cascade	0.760566	1
biological_process	GO:0030855	epithelial cell differentiation	0.763732	1
molecular_function	GO:0016301	kinase activity	0.76633	1
cellular_component	GO:0036477	somatodendritic compartment	0.766902	1
biological_process	GO:0032989	cellular component morphogenesis	0.7673	1
biological_process	GO:0045859	regulation of protein kinase activity	0.771252	1
biological_process	GO:0006810	transport	0.774988	1
biological_process	GO:0032940	secretion by cell	0.779505	1
biological_process	GO:0050801	ion homeostasis	0.78022	1
biological_process	GO:0031329	regulation of cellular catabolic process	0.785191	1
biological_process	GO:0048609	multicellular organismal reproductive process	0.790453	1
biological_process	GO:0140352	export from cell	0.793498	1
biological_process	GO:0019953	sexual reproduction	0.794415	1
biological_process	GO:0032504	multicellular organism reproduction	0.796369	1
biological_process	GO:0051234	establishment of localization	0.79938	1
biological_process	GO:0032502	developmental process	0.799554	1
biological_process	GO:0043549	regulation of kinase activity	0.802878	1
biological_process	GO:0032270	positive regulation of cellular protein metabolic process	0.803566	1
biological_process	GO:0043604	amide biosynthetic process	0.805127	1
biological_process	GO:0042325	regulation of phosphorylation	0.805299	1
biological_process	GO:0016071	mRNA metabolic process	0.805499	1
biological_process	GO:0006518	peptide metabolic process	0.806982	1
biological_process	GO:0048856	anatomical structure development	0.810338	1
biological_process	GO:0051128	regulation of cellular component organization	0.818936	1
biological_process	GO:0048585	negative regulation of response to stimulus	0.826924	1
cellular_component	GO:0031982	vesicle	0.827733	1
biological_process	GO:0008284	positive regulation of cell population proliferation	0.831218	1
biological_process	GO:0051247	positive regulation of protein metabolic process	0.831297	1
biological_process	GO:0000165	MAPK cascade	0.833473	1
cellular_component	GO:0005576	extracellular region	0.835953	1
biological_process	GO:0003006	developmental process involved in reproduction	0.836957	1
biological_process	GO:0023014	signal transduction by protein phosphorylation	0.836957	1
biological_process	GO:0031175	neuron projection development	0.839754	1
biological_process	GO:0009894	regulation of catabolic process	0.840062	1
biological_process	GO:0051179	localization	0.84018	1
biological_process	GO:0051050	positive regulation of transport	0.840676	1
biological_process	GO:0009725	response to hormone	0.841898	1
cellular_component	GO:0030054	cell junction	0.844563	1
molecular_function	GO:0008092	cytoskeletal protein binding	0.846784	1
biological_process	GO:0044703	multi-organism reproductive process	0.851061	1
biological_process	GO:0019220	regulation of phosphate metabolic process	0.855131	1
biological_process	GO:0051174	regulation of phosphorus metabolic process	0.855576	1
biological_process	GO:0000902	cell morphogenesis	0.856143	1
biological_process	GO:0007167	enzyme linked receptor protein signaling pathway	0.859166	1
biological_process	GO:0051093	negative regulation of developmental process	0.859437	1
biological_process	GO:0010243	response to organonitrogen compound	0.861325	1
biological_process	GO:0042493	response to drug	0.862923	1
biological_process	GO:0009887	animal organ morphogenesis	0.865287	1
biological_process	GO:0007267	cell-cell signaling	0.865486	1
biological_process	GO:0044255	cellular lipid metabolic process	0.866066	1
biological_process	GO:0006796	phosphate-containing compound metabolic process	0.873056	1
biological_process	GO:0016043	cellular component organization	0.8734	1
biological_process	GO:0065003	protein-containing complex assembly	0.874793	1
biological_process	GO:0048666	neuron development	0.875806	1
biological_process	GO:0006793	phosphorus metabolic process	0.877373	1
biological_process	GO:0009987	cellular process	0.879578	1
biological_process	GO:0043603	cellular amide metabolic process	0.883959	1
cellular_component	GO:0005615	extracellular space	0.8862	1
biological_process	GO:0051641	cellular localization	0.888301	1
biological_process	GO:0006468	protein phosphorylation	0.889801	1
molecular_function	GO:0044877	protein-containing complex binding	0.891552	1
biological_process	GO:0009653	anatomical structure morphogenesis	0.89317	1
biological_process	GO:0051649	establishment of localization in cell	0.893625	1
biological_process	GO:1901701	cellular response to oxygen-containing compound	0.894916	1
cellular_component	GO:0099080	supramolecular complex	0.895663	1
biological_process	GO:0071840	cellular component organization or biogenesis	0.896619	1
molecular_function	GO:0005215	transporter activity	0.89827	1
biological_process	GO:0009628	response to abiotic stimulus	0.90299	1
biological_process	GO:0009888	tissue development	0.903184	1
cellular_component	GO:0043005	neuron projection	0.903983	1
biological_process	GO:0033043	regulation of organelle organization	0.906888	1
cellular_component	GO:1902494	catalytic complex	0.911165	1
biological_process	GO:0045321	leukocyte activation	0.911505	1
biological_process	GO:0060429	epithelium development	0.91271	1
cellular_component	GO:0005783	endoplasmic reticulum	0.91519	1
biological_process	GO:0043933	protein-containing complex subunit organization	0.91822	1
biological_process	GO:0048468	cell development	0.919943	1
cellular_component	GO:0031410	cytoplasmic vesicle	0.920993	1
cellular_component	GO:0097708	intracellular vesicle	0.921361	1
cellular_component	GO:0032991	protein-containing complex	0.922097	1
biological_process	GO:0030182	neuron differentiation	0.924509	1
biological_process	GO:0022402	cell cycle process	0.928697	1
biological_process	GO:0001775	cell activation	0.934882	1
biological_process	GO:0071495	cellular response to endogenous stimulus	0.93603	1
biological_process	GO:0022414	reproductive process	0.936909	1
biological_process	GO:0000003	reproduction	0.937282	1
biological_process	GO:0120036	plasma membrane bounded cell projection organization	0.941827	1
biological_process	GO:0048699	generation of neurons	0.94486	1
biological_process	GO:0030030	cell projection organization	0.945944	1
biological_process	GO:0016310	phosphorylation	0.946005	1
cellular_component	GO:0005887	integral component of plasma membrane	0.947339	1
cellular_component	GO:0005886	plasma membrane	0.951894	1
cellular_component	GO:0031226	intrinsic component of plasma membrane	0.954629	1
biological_process	GO:0022008	neurogenesis	0.954723	1
cellular_component	GO:0071944	cell periphery	0.958973	1
biological_process	GO:1901700	response to oxygen-containing compound	0.959681	1
biological_process	GO:0009719	response to endogenous stimulus	0.962111	1
biological_process	GO:0006811	ion transport	0.962339	1
biological_process	GO:0007049	cell cycle	0.971656	1
biological_process	GO:0016192	vesicle-mediated transport	0.983391	1
biological_process	GO:0003008	system process	0.986542	1
biological_process	GO:0007399	nervous system development	0.990249	1
cellular_component	GO:0016021	integral component of membrane	0.991276	1
cellular_component	GO:0031224	intrinsic component of membrane	0.99339	1
biological_process	GO:0008150	biological_process	1	1
cellular_component	GO:0005575	cellular_component	1	1
molecular_function	GO:0003674	molecular_function	1	1
cellular_component	GO:0000111	nucleotide-excision repair factor 2 complex	1	1
cellular_component	GO:0000112	nucleotide-excision repair factor 3 complex	1	1
cellular_component	GO:0000262	mitochondrial chromosome	1	1
cellular_component	GO:0000274	mitochondrial proton-transporting ATP synthase, stator stalk	1	1
cellular_component	GO:0000324	fungal-type vacuole	1	1
cellular_component	GO:0000329	fungal-type vacuole membrane	1	1
cellular_component	GO:0000417	HIR complex	1	1
cellular_component	GO:0000789	cytoplasmic chromatin	1	1
cellular_component	GO:0000797	condensin core heterodimer	1	1
cellular_component	GO:0000802	transverse filament	1	1
cellular_component	GO:0002140	stereocilia tip link	1	1
cellular_component	GO:0002144	cytosolic tRNA wobble base thiouridylase complex	1	1
cellular_component	GO:0005582	collagen type XV trimer	1	1
cellular_component	GO:0005585	collagen type II trimer	1	1
cellular_component	GO:0005586	collagen type III trimer	1	1
cellular_component	GO:0005590	collagen type VII trimer	1	1
cellular_component	GO:0005591	collagen type VIII trimer	1	1
cellular_component	GO:0005595	collagen type XII trimer	1	1
cellular_component	GO:0005596	collagen type XIV trimer	1	1
cellular_component	GO:0005597	collagen type XVI trimer	1	1
cellular_component	GO:0005598	short-chain collagen trimer	1	1
cellular_component	GO:0005600	collagen type XIII trimer	1	1
cellular_component	GO:0005693	U12 snRNP	1	1
cellular_component	GO:0005715	late recombination nodule	1	1
cellular_component	GO:0005731	nucleolus organizer region	1	1
cellular_component	GO:0005754	mitochondrial proton-transporting ATP synthase, catalytic core	1	1
cellular_component	GO:0005848	mRNA cleavage stimulating factor complex	1	1
cellular_component	GO:0005880	nuclear microtubule	1	1
cellular_component	GO:0005889	potassium:proton exchanging ATPase complex	1	1
cellular_component	GO:0005895	interleukin-5 receptor complex	1	1
cellular_component	GO:0005898	interleukin-13 receptor complex	1	1
cellular_component	GO:0005914	spot adherens junction	1	1
cellular_component	GO:0005969	serine-pyruvate aminotransferase complex	1	1
cellular_component	GO:0008352	katanin complex	1	1
cellular_component	GO:0009346	citrate lyase complex	1	1
cellular_component	GO:0009353	mitochondrial oxoglutarate dehydrogenase complex	1	1
cellular_component	GO:0009360	DNA polymerase III complex	1	1
cellular_component	GO:0009841	mitochondrial endopeptidase Clp complex	1	1
cellular_component	GO:0014705	C zone	1	1
cellular_component	GO:0014801	longitudinal sarcoplasmic reticulum	1	1
cellular_component	GO:0014804	terminal cisterna lumen	1	1
cellular_component	GO:0016028	rhabdomere	1	1
cellular_component	GO:0016507	mitochondrial fatty acid beta-oxidation multienzyme complex	1	1
cellular_component	GO:0016590	ACF complex	1	1
cellular_component	GO:0016938	kinesin I complex	1	1
cellular_component	GO:0017054	negative cofactor 2 complex	1	1
cellular_component	GO:0017071	intracellular cyclic nucleotide activated cation channel complex	1	1
cellular_component	GO:0017122	protein N-acetylglucosaminyltransferase complex	1	1
cellular_component	GO:0030142	COPI-coated Golgi to ER transport vesicle	1	1
cellular_component	GO:0030312	external encapsulating structure	1	1
cellular_component	GO:0030526	granulocyte macrophage colony-stimulating factor receptor complex	1	1
cellular_component	GO:0030690	Noc1p-Noc2p complex	1	1
cellular_component	GO:0030691	Noc2p-Noc3p complex	1	1
cellular_component	GO:0030874	nucleolar chromatin	1	1
cellular_component	GO:0030892	mitotic cohesin complex	1	1
cellular_component	GO:0030935	sheet-forming collagen trimer	1	1
cellular_component	GO:0030936	transmembrane collagen trimer	1	1
cellular_component	GO:0031207	Sec62/Sec63 complex	1	1
cellular_component	GO:0031257	cell trailing edge membrane	1	1
cellular_component	GO:0031259	uropod membrane	1	1
cellular_component	GO:0031260	pseudopodium membrane	1	1
cellular_component	GO:0031308	intrinsic component of nuclear outer membrane	1	1
cellular_component	GO:0031309	integral component of nuclear outer membrane	1	1
cellular_component	GO:0031389	Rad17 RFC-like complex	1	1
cellular_component	GO:0031422	RecQ family helicase-topoisomerase III complex	1	1
cellular_component	GO:0031475	myosin V complex	1	1
cellular_component	GO:0031477	myosin VII complex	1	1
cellular_component	GO:0031511	Mis6-Sim4 complex	1	1
cellular_component	GO:0031592	centrosomal corona	1	1
cellular_component	GO:0031673	H zone	1	1
cellular_component	GO:0032144	4-aminobutyrate transaminase complex	1	1
cellular_component	GO:0032173	septin collar	1	1
cellular_component	GO:0032419	extrinsic component of lysosome membrane	1	1
cellular_component	GO:0032996	Bcl3-Bcl10 complex	1	1
cellular_component	GO:0033100	NuA3 histone acetyltransferase complex	1	1
cellular_component	GO:0033167	ARC complex	1	1
cellular_component	GO:0033193	Lsd1/2 complex	1	1
cellular_component	GO:0033291	eukaryotic 80S initiation complex	1	1
cellular_component	GO:0033593	BRCA2-MAGE-D1 complex	1	1
cellular_component	GO:0033597	mitotic checkpoint complex	1	1
cellular_component	GO:0033644	host cell membrane	1	1
cellular_component	GO:0033650	host cell mitochondrion	1	1
cellular_component	GO:0034245	mitochondrial DNA-directed RNA polymerase complex	1	1
cellular_component	GO:0034359	mature chylomicron	1	1
cellular_component	GO:0034360	chylomicron remnant	1	1
cellular_component	GO:0034423	autophagosome lumen	1	1
cellular_component	GO:0034466	chromaffin granule lumen	1	1
cellular_component	GO:0034506	chromosome, centromeric core domain	1	1
cellular_component	GO:0034592	synaptic vesicle lumen	1	1
cellular_component	GO:0034668	integrin alpha4-beta1 complex	1	1
cellular_component	GO:0034676	integrin alpha6-beta4 complex	1	1
cellular_component	GO:0034677	integrin alpha7-beta1 complex	1	1
cellular_component	GO:0034679	integrin alpha9-beta1 complex	1	1
cellular_component	GO:0034693	U11/U12 snRNP	1	1
cellular_component	GO:0034718	SMN-Gemin2 complex	1	1
cellular_component	GO:0034752	cytosolic aryl hydrocarbon receptor complex	1	1
cellular_component	GO:0034777	recycling endosome lumen	1	1
cellular_component	GO:0035000	oligosaccharyltransferase III complex	1	1
cellular_component	GO:0035003	subapical complex	1	1
cellular_component	GO:0035355	Toll-like receptor 2-Toll-like receptor 6 protein complex	1	1
cellular_component	GO:0035525	NF-kappaB p50/p65 complex	1	1
cellular_component	GO:0035657	eRF1 methyltransferase complex	1	1
cellular_component	GO:0035693	NOS2-CD74 complex	1	1
cellular_component	GO:0035805	egg coat	1	1
cellular_component	GO:0036024	protein C inhibitor-TMPRSS7 complex	1	1
cellular_component	GO:0036025	protein C inhibitor-TMPRSS11E complex	1	1
cellular_component	GO:0036026	protein C inhibitor-PLAT complex	1	1
cellular_component	GO:0036027	protein C inhibitor-PLAU complex	1	1
cellular_component	GO:0036028	protein C inhibitor-thrombin complex	1	1
cellular_component	GO:0036029	protein C inhibitor-KLK3 complex	1	1
cellular_component	GO:0036030	protein C inhibitor-plasma kallikrein complex	1	1
cellular_component	GO:0036053	glomerular endothelium fenestra	1	1
cellular_component	GO:0036125	fatty acid beta-oxidation multienzyme complex	1	1
cellular_component	GO:0036266	Cdc48p-Npl4p-Vms1p AAA ATPase complex	1	1
cellular_component	GO:0036398	TCR signalosome	1	1
cellular_component	GO:0038038	G protein-coupled receptor homodimeric complex	1	1
cellular_component	GO:0039713	viral factory	1	1
cellular_component	GO:0039714	cytoplasmic viral factory	1	1
cellular_component	GO:0042022	interleukin-12 receptor complex	1	1
cellular_component	GO:0042564	NLS-dependent protein nuclear import complex	1	1
cellular_component	GO:0042568	insulin-like growth factor binary complex	1	1
cellular_component	GO:0043033	isoamylase complex	1	1
cellular_component	GO:0043160	acrosomal lumen	1	1
cellular_component	GO:0043257	laminin-8 complex	1	1
cellular_component	GO:0043265	ectoplasm	1	1
cellular_component	GO:0043509	activin A complex	1	1
cellular_component	GO:0043513	inhibin B complex	1	1
cellular_component	GO:0043529	GET complex	1	1
cellular_component	GO:0043540	6-phosphofructo-2-kinase/fructose-2,6-biphosphatase complex	1	1
cellular_component	GO:0043626	PCNA complex	1	1
cellular_component	GO:0044190	host cell mitochondrial envelope	1	1
cellular_component	GO:0044207	translation initiation ternary complex	1	1
cellular_component	GO:0044220	host cell perinuclear region of cytoplasm	1	1
cellular_component	GO:0044221	host cell synapse	1	1
cellular_component	GO:0044228	host cell surface	1	1
cellular_component	GO:0044231	host cell presynaptic membrane	1	1
cellular_component	GO:0044284	mitochondrial crista junction	1	1
cellular_component	GO:0044317	rod spherule	1	1
cellular_component	GO:0044599	AP-5 adaptor complex	1	1
cellular_component	GO:0044796	DNA polymerase processivity factor complex	1	1
cellular_component	GO:0045244	succinate-CoA ligase complex (GDP-forming)	1	1
cellular_component	GO:0045265	proton-transporting ATP synthase, stator stalk	1	1
cellular_component	GO:0045267	proton-transporting ATP synthase, catalytic core	1	1
cellular_component	GO:0045272	plasma membrane respiratory chain complex I	1	1
cellular_component	GO:0045274	plasma membrane respiratory chain complex II	1	1
cellular_component	GO:0045282	plasma membrane succinate dehydrogenase complex	1	1
cellular_component	GO:0046611	lysosomal proton-transporting V-type ATPase complex	1	1
cellular_component	GO:0046691	intracellular canaliculus	1	1
cellular_component	GO:0048180	activin complex	1	1
cellular_component	GO:0055028	cortical microtubule	1	1
cellular_component	GO:0055120	striated muscle dense body	1	1
cellular_component	GO:0060473	cortical granule	1	1
cellular_component	GO:0060987	lipid tube	1	1
cellular_component	GO:0061474	phagolysosome membrane	1	1
cellular_component	GO:0061825	podosome core	1	1
cellular_component	GO:0061828	apical tubulobulbar complex	1	1
cellular_component	GO:0061829	basal tubulobulbar complex	1	1
cellular_component	GO:0061830	concave side of sperm head	1	1
cellular_component	GO:0061831	apical ectoplasmic specialization	1	1
cellular_component	GO:0061832	basal ectoplasmic specialization	1	1
cellular_component	GO:0061845	neuron projection branch point	1	1
cellular_component	GO:0061846	dendritic spine cytoplasm	1	1
cellular_component	GO:0061850	growth cone leading edge	1	1
cellular_component	GO:0070176	DRM complex	1	1
cellular_component	GO:0070274	RES complex	1	1
cellular_component	GO:0070421	DNA ligase III-XRCC1 complex	1	1
cellular_component	GO:0070442	integrin alphaIIb-beta3 complex	1	1
cellular_component	GO:0070516	CAK-ERCC2 complex	1	1
cellular_component	GO:0070618	Grb2-Sos complex	1	1
cellular_component	GO:0070685	macropinocytic cup	1	1
cellular_component	GO:0070702	inner mucus layer	1	1
cellular_component	GO:0070703	outer mucus layer	1	1
cellular_component	GO:0070762	nuclear pore transmembrane ring	1	1
cellular_component	GO:0070772	PAS complex	1	1
cellular_component	GO:0070826	paraferritin complex	1	1
cellular_component	GO:0070860	RNA polymerase I core factor complex	1	1
cellular_component	GO:0070931	Golgi-associated vesicle lumen	1	1
cellular_component	GO:0070992	translation initiation complex	1	1
cellular_component	GO:0071021	U2-type post-spliceosomal complex	1	1
cellular_component	GO:0071133	alpha9-beta1 integrin-ADAM8 complex	1	1
cellular_component	GO:0071561	nucleus-vacuole junction	1	1
cellular_component	GO:0071575	integral component of external side of plasma membrane	1	1
cellular_component	GO:0071665	gamma-catenin-TCF7L2 complex	1	1
cellular_component	GO:0071757	hexameric IgM immunoglobulin complex	1	1
cellular_component	GO:0072492	host cell mitochondrial intermembrane space	1	1
cellular_component	GO:0072517	host cell viral assembly compartment	1	1
cellular_component	GO:0075341	host cell PML body	1	1
cellular_component	GO:0090534	calcium ion-transporting ATPase complex	1	1
cellular_component	GO:0090619	meiotic spindle pole	1	1
cellular_component	GO:0090658	cone matrix sheath	1	1
cellular_component	GO:0090730	Las1 complex	1	1
cellular_component	GO:0097132	cyclin D2-CDK6 complex	1	1
cellular_component	GO:0097144	BAX complex	1	1
cellular_component	GO:0097145	BAK complex	1	1
cellular_component	GO:0097181	protein C inhibitor-coagulation factor V complex	1	1
cellular_component	GO:0097182	protein C inhibitor-coagulation factor Xa complex	1	1
cellular_component	GO:0097183	protein C inhibitor-coagulation factor XI complex	1	1
cellular_component	GO:0097226	sperm mitochondrial sheath	1	1
cellular_component	GO:0097356	perinucleolar compartment	1	1
cellular_component	GO:0097409	glial cytoplasmic inclusion	1	1
cellular_component	GO:0097414	classical Lewy body	1	1
cellular_component	GO:0097453	mesaxon	1	1
cellular_component	GO:0097462	Lewy neurite	1	1
cellular_component	GO:0097489	multivesicular body, internal vesicle lumen	1	1
cellular_component	GO:0097505	Rad6-Rad18 complex	1	1
cellular_component	GO:0097541	axonemal basal plate	1	1
cellular_component	GO:0097543	ciliary inversin compartment	1	1
cellular_component	GO:0097630	intrinsic component of omegasome membrane	1	1
cellular_component	GO:0097631	integral component of omegasome membrane	1	1
cellular_component	GO:0097649	A axonemal microtubule	1	1
cellular_component	GO:0097728	9+0 motile cilium	1	1
cellular_component	GO:0098547	lumenal side of Golgi membrane	1	1
cellular_component	GO:0098577	inactive sex chromosome	1	1
cellular_component	GO:0098594	mucin granule	1	1
cellular_component	GO:0098595	perivitelline space	1	1
cellular_component	GO:0098637	protein complex involved in cell-matrix adhesion	1	1
cellular_component	GO:0098646	collagen sheet	1	1
cellular_component	GO:0098648	collagen anchoring fibril	1	1
cellular_component	GO:0098652	collagen type VII anchoring fibril	1	1
cellular_component	GO:0098683	cochlear hair cell ribbon synapse	1	1
cellular_component	GO:0098745	Dcp1-Dcp2 complex	1	1
cellular_component	GO:0098753	anchored component of the cytoplasmic side of the plasma membrane	1	1
cellular_component	GO:0098830	presynaptic endosome	1	1
cellular_component	GO:0098875	epididymosome	1	1
cellular_component	GO:0098891	extrinsic component of presynaptic active zone membrane	1	1
cellular_component	GO:0098896	postsynaptic early endosome membrane	1	1
cellular_component	GO:0098897	spine apparatus membrane	1	1
cellular_component	GO:0098898	dense core granule lumen	1	1
cellular_component	GO:0098952	intrinsic component of spine apparatus membrane	1	1
cellular_component	GO:0098998	extrinsic component of postsynaptic early endosome membrane	1	1
cellular_component	GO:0099013	neuronal dense core vesicle lumen	1	1
cellular_component	GO:0099020	perinuclear endoplasmic reticulum lumen	1	1
cellular_component	GO:0099065	integral component of spine apparatus membrane	1	1
cellular_component	GO:0099115	chromosome, subtelomeric region	1	1
cellular_component	GO:0099182	presynaptic intermediate filament cytoskeleton	1	1
cellular_component	GO:0099189	postsynaptic spectrin-associated cytoskeleton	1	1
cellular_component	GO:0099192	cerebellar Golgi cell to granule cell synapse	1	1
cellular_component	GO:0099400	caveola neck	1	1
cellular_component	GO:0099617	matrix side of mitochondrial inner membrane	1	1
cellular_component	GO:0106003	amyloid-beta complex	1	1
cellular_component	GO:0110070	cellularization cleavage furrow	1	1
cellular_component	GO:0120003	hinge region between urothelial plaques of apical plasma membrane	1	1
cellular_component	GO:0120043	stereocilium shaft	1	1
cellular_component	GO:0120044	stereocilium base	1	1
cellular_component	GO:0120134	proximal portion of axoneme	1	1
cellular_component	GO:0120135	distal portion of axoneme	1	1
cellular_component	GO:0140261	BCOR complex	1	1
cellular_component	GO:0150002	distal dendrite	1	1
cellular_component	GO:0150014	apical distal dendrite	1	1
cellular_component	GO:1902773	GTPase activator complex	1	1
cellular_component	GO:1902912	pyruvate kinase complex	1	1
cellular_component	GO:1905370	serine-type endopeptidase complex	1	1
cellular_component	GO:1905720	cytoplasmic microtubule bundle	1	1
cellular_component	GO:1990008	neurosecretory vesicle	1	1
cellular_component	GO:1990015	ensheathing process	1	1
cellular_component	GO:1990031	pinceau fiber	1	1
cellular_component	GO:1990032	parallel fiber	1	1
cellular_component	GO:1990038	Lewy body corona	1	1
cellular_component	GO:1990047	spindle matrix	1	1
cellular_component	GO:1990070	TRAPPI protein complex	1	1
cellular_component	GO:1990221	L-cysteine desulfurase complex	1	1
cellular_component	GO:1990298	bub1-bub3 complex	1	1
cellular_component	GO:1990332	Ire1 complex	1	1
cellular_component	GO:1990356	sumoylated E2 ligase complex	1	1
cellular_component	GO:1990427	stereocilia tip-link density	1	1
cellular_component	GO:1990435	upper tip-link density	1	1
cellular_component	GO:1990467	NuA3a histone acetyltransferase complex	1	1
cellular_component	GO:1990468	NuA3b histone acetyltransferase complex	1	1
cellular_component	GO:1990512	Cry-Per complex	1	1
cellular_component	GO:1990673	intrinsic component of endoplasmic reticulum-Golgi intermediate compartment (ERGIC) membrane	1	1
cellular_component	GO:1990674	Golgi cis cisterna membrane	1	1
cellular_component	GO:1990701	integral component of endoplasmic reticulum-Golgi intermediate compartment (ERGIC) membrane	1	1
cellular_component	GO:1990707	nuclear subtelomeric heterochromatin	1	1
cellular_component	GO:1990718	axonemal central pair projection	1	1
cellular_component	GO:1990836	lysosomal matrix	1	1
cellular_component	GO:1990843	subsarcolemmal mitochondrion	1	1
cellular_component	GO:1990844	interfibrillar mitochondrion	1	1
cellular_component	GO:1990876	cytoplasmic side of nuclear pore	1	1
cellular_component	GO:1990917	ooplasm	1	1
cellular_component	GO:1990971	EMILIN complex	1	1
biological_process	GO:0000032	cell wall mannoprotein biosynthetic process	1	1
biological_process	GO:0000053	argininosuccinate metabolic process	1	1
biological_process	GO:0000160	phosphorelay signal transduction system	1	1
biological_process	GO:0000173	inactivation of MAPK activity involved in osmosensory signaling pathway	1	1
biological_process	GO:0000256	allantoin catabolic process	1	1
biological_process	GO:0000296	spermine transport	1	1
biological_process	GO:0000304	response to singlet oxygen	1	1
biological_process	GO:0000378	RNA exon ligation	1	1
biological_process	GO:0000388	spliceosome conformational change to release U4 (or U4atac) and U1 (or U11)	1	1
biological_process	GO:0000409	regulation of transcription by galactose	1	1
biological_process	GO:0000411	positive regulation of transcription by galactose	1	1
biological_process	GO:0000415	negative regulation of histone H3-K36 methylation	1	1
biological_process	GO:0000431	regulation of transcription from RNA polymerase II promoter by galactose	1	1
biological_process	GO:0000435	positive regulation of transcription from RNA polymerase II promoter by galactose	1	1
biological_process	GO:0000453	enzyme-directed rRNA 2'-O-methylation	1	1
biological_process	GO:0000461	endonucleolytic cleavage to generate mature 3'-end of SSU-rRNA from (SSU-rRNA, 5.8S rRNA, LSU-rRNA)	1	1
biological_process	GO:0000481	maturation of 5S rRNA	1	1
biological_process	GO:0000707	meiotic DNA recombinase assembly	1	1
biological_process	GO:0000718	nucleotide-excision repair, DNA damage removal	1	1
biological_process	GO:0000732	strand displacement	1	1
biological_process	GO:0000735	removal of nonhomologous ends	1	1
biological_process	GO:0000741	karyogamy	1	1
biological_process	GO:0000916	actomyosin contractile ring contraction	1	1
biological_process	GO:0000917	division septum assembly	1	1
biological_process	GO:0000921	septin ring assembly	1	1
biological_process	GO:0000968	tRNA exon ligation	1	1
biological_process	GO:0000971	tRNA exon ligation utilizing 2',3' cyclic phosphate of 5'-exon as source of linkage phosphate	1	1
biological_process	GO:0001080	nitrogen catabolite activation of transcription from RNA polymerase II promoter	1	1
biological_process	GO:0001081	nitrogen catabolite repression of transcription from RNA polymerase II promoter	1	1
biological_process	GO:0001100	negative regulation of exit from mitosis	1	1
biological_process	GO:0001112	DNA-templated transcriptional open complex formation	1	1
biological_process	GO:0001113	transcriptional open complex formation at RNA polymerase II promoter	1	1
biological_process	GO:0001120	protein-DNA complex remodeling	1	1
biological_process	GO:0001173	DNA-templated transcriptional start site selection	1	1
biological_process	GO:0001174	transcriptional start site selection at RNA polymerase II promoter	1	1
biological_process	GO:0001192	maintenance of transcriptional fidelity during DNA-templated transcription elongation	1	1
biological_process	GO:0001193	maintenance of transcriptional fidelity during DNA-templated transcription elongation from RNA polymerase II promoter	1	1
biological_process	GO:0001207	histone displacement	1	1
biological_process	GO:0001315	age-dependent response to reactive oxygen species	1	1
biological_process	GO:0001543	ovarian follicle rupture	1	1
biological_process	GO:0001545	primary ovarian follicle growth	1	1
biological_process	GO:0001552	ovarian follicle atresia	1	1
biological_process	GO:0001572	lactosylceramide biosynthetic process	1	1
biological_process	GO:0001576	globoside biosynthetic process	1	1
biological_process	GO:0001680	tRNA 3'-terminal CCA addition	1	1
biological_process	GO:0001695	histamine catabolic process	1	1
biological_process	GO:0001697	histamine-induced gastric acid secretion	1	1
biological_process	GO:0001715	ectodermal cell fate specification	1	1
biological_process	GO:0001770	establishment of natural killer cell polarity	1	1
biological_process	GO:0001797	negative regulation of type IIa hypersensitivity	1	1
biological_process	GO:0001808	negative regulation of type IV hypersensitivity	1	1
biological_process	GO:0001809	positive regulation of type IV hypersensitivity	1	1
biological_process	GO:0001811	negative regulation of type I hypersensitivity	1	1
biological_process	GO:0001814	negative regulation of antibody-dependent cellular cytotoxicity	1	1
biological_process	GO:0001815	positive regulation of antibody-dependent cellular cytotoxicity	1	1
biological_process	GO:0001897	cytolysis by symbiont of host cells	1	1
biological_process	GO:0001898	regulation of cytolysis by symbiont of host cells	1	1
biological_process	GO:0001899	negative regulation of cytolysis by symbiont of host cells	1	1
biological_process	GO:0001927	exocyst assembly	1	1
biological_process	GO:0001928	regulation of exocyst assembly	1	1
biological_process	GO:0001949	sebaceous gland cell differentiation	1	1
biological_process	GO:0001971	negative regulation of activation of membrane attack complex	1	1
biological_process	GO:0001978	regulation of systemic arterial blood pressure by carotid sinus baroreceptor feedback	1	1
biological_process	GO:0001979	regulation of systemic arterial blood pressure by chemoreceptor signaling	1	1
biological_process	GO:0001980	regulation of systemic arterial blood pressure by ischemic conditions	1	1
biological_process	GO:0001983	baroreceptor response to increased systemic arterial blood pressure	1	1
biological_process	GO:0001985	negative regulation of heart rate involved in baroreceptor response to increased systemic arterial blood pressure	1	1
biological_process	GO:0001998	angiotensin-mediated vasoconstriction involved in regulation of systemic arterial blood pressure	1	1
biological_process	GO:0002007	detection of hypoxic conditions in blood by chemoreceptor signaling	1	1
biological_process	GO:0002030	inhibitory G protein-coupled receptor phosphorylation	1	1
biological_process	GO:0002033	angiotensin-mediated vasodilation involved in regulation of systemic arterial blood pressure	1	1
biological_process	GO:0002037	negative regulation of L-glutamate import across plasma membrane	1	1
biological_process	GO:0002041	intussusceptive angiogenesis	1	1
biological_process	GO:0002077	acrosome matrix dispersal	1	1
biological_process	GO:0002127	tRNA wobble base cytosine methylation	1	1
biological_process	GO:0002128	tRNA nucleoside ribose methylation	1	1
biological_process	GO:0002148	hypochlorous acid metabolic process	1	1
biological_process	GO:0002149	hypochlorous acid biosynthetic process	1	1
biological_process	GO:0002152	bile acid conjugation	1	1
biological_process	GO:0002174	mammary stem cell proliferation	1	1
biological_process	GO:0002194	hepatocyte cell migration	1	1
biological_process	GO:0002264	endothelial cell activation involved in immune response	1	1
biological_process	GO:0002270	plasmacytoid dendritic cell activation	1	1
biological_process	GO:0002280	monocyte activation involved in immune response	1	1
biological_process	GO:0002290	gamma-delta T cell activation involved in immune response	1	1
biological_process	GO:0002299	alpha-beta intraepithelial T cell differentiation	1	1
biological_process	GO:0002300	CD8-positive, alpha-beta intraepithelial T cell differentiation	1	1
biological_process	GO:0002302	CD8-positive, alpha-beta T cell differentiation involved in immune response	1	1
biological_process	GO:0002332	transitional stage B cell differentiation	1	1
biological_process	GO:0002333	transitional one stage B cell differentiation	1	1
biological_process	GO:0002336	B-1 B cell lineage commitment	1	1
biological_process	GO:0002343	peripheral B cell selection	1	1
biological_process	GO:0002344	B cell affinity maturation	1	1
biological_process	GO:0002355	detection of tumor cell	1	1
biological_process	GO:0002362	CD4-positive, CD25-positive, alpha-beta regulatory T cell lineage commitment	1	1
biological_process	GO:0002373	plasmacytoid dendritic cell cytokine production	1	1
biological_process	GO:0002379	immunoglobulin biosynthetic process involved in immune response	1	1
biological_process	GO:0002380	immunoglobulin secretion involved in immune response	1	1
biological_process	GO:0002383	immune response in brain or nervous system	1	1
biological_process	GO:0002387	immune response in gut-associated lymphoid tissue	1	1
biological_process	GO:0002395	immune response in nasopharyngeal-associated lymphoid tissue	1	1
biological_process	GO:0002398	MHC class Ib protein complex assembly	1	1
biological_process	GO:0002413	tolerance induction to tumor cell	1	1
biological_process	GO:0002416	IgG immunoglobulin transcytosis in epithelial cells mediated by FcRn immunoglobulin receptor	1	1
biological_process	GO:0002432	granuloma formation	1	1
biological_process	GO:0002450	B cell antigen processing and presentation	1	1
biological_process	GO:0002451	peripheral B cell tolerance induction	1	1
biological_process	GO:0002470	plasmacytoid dendritic cell antigen processing and presentation	1	1
biological_process	GO:0002472	macrophage antigen processing and presentation	1	1
biological_process	GO:0002481	antigen processing and presentation of exogenous protein antigen via MHC class Ib, TAP-dependent	1	1
biological_process	GO:0002488	antigen processing and presentation of endogenous peptide antigen via MHC class Ib via ER pathway	1	1
biological_process	GO:0002489	antigen processing and presentation of endogenous peptide antigen via MHC class Ib via ER pathway, TAP-dependent	1	1
biological_process	GO:0002509	central tolerance induction to self antigen	1	1
biological_process	GO:0002510	central B cell tolerance induction	1	1
biological_process	GO:0002518	lymphocyte chemotaxis across high endothelial venule	1	1
biological_process	GO:0002545	chronic inflammatory response to non-antigenic stimulus	1	1
biological_process	GO:0002616	regulation of macrophage antigen processing and presentation	1	1
biological_process	GO:0002617	negative regulation of macrophage antigen processing and presentation	1	1
biological_process	GO:0002622	regulation of B cell antigen processing and presentation	1	1
biological_process	GO:0002626	negative regulation of T cell antigen processing and presentation	1	1
biological_process	GO:0002640	regulation of immunoglobulin biosynthetic process	1	1
biological_process	GO:0002642	positive regulation of immunoglobulin biosynthetic process	1	1
biological_process	GO:0002644	negative regulation of tolerance induction	1	1
biological_process	GO:0002646	regulation of central tolerance induction	1	1
biological_process	GO:0002648	positive regulation of central tolerance induction	1	1
biological_process	GO:0002649	regulation of tolerance induction to self antigen	1	1
biological_process	GO:0002651	positive regulation of tolerance induction to self antigen	1	1
biological_process	GO:0002721	regulation of B cell cytokine production	1	1
biological_process	GO:0002736	regulation of plasmacytoid dendritic cell cytokine production	1	1
biological_process	GO:0002737	negative regulation of plasmacytoid dendritic cell cytokine production	1	1
biological_process	GO:0002777	antimicrobial peptide biosynthetic process	1	1
biological_process	GO:0002780	antibacterial peptide biosynthetic process	1	1
biological_process	GO:0002785	negative regulation of antimicrobial peptide production	1	1
biological_process	GO:0002787	negative regulation of antibacterial peptide production	1	1
biological_process	GO:0002812	biosynthetic process of antibacterial peptides active against Gram-negative bacteria	1	1
biological_process	GO:0002843	regulation of tolerance induction to tumor cell	1	1
biological_process	GO:0002845	positive regulation of tolerance induction to tumor cell	1	1
biological_process	GO:0002849	regulation of peripheral T cell tolerance induction	1	1
biological_process	GO:0002851	positive regulation of peripheral T cell tolerance induction	1	1
biological_process	GO:0002875	negative regulation of chronic inflammatory response to antigenic stimulus	1	1
biological_process	GO:0002878	negative regulation of acute inflammatory response to non-antigenic stimulus	1	1
biological_process	GO:0002880	regulation of chronic inflammatory response to non-antigenic stimulus	1	1
biological_process	GO:0002882	positive regulation of chronic inflammatory response to non-antigenic stimulus	1	1
biological_process	GO:0002893	negative regulation of type II hypersensitivity	1	1
biological_process	GO:0002895	regulation of central B cell tolerance induction	1	1
biological_process	GO:0002897	positive regulation of central B cell tolerance induction	1	1
biological_process	GO:0002926	tRNA wobble base 5-methoxycarbonylmethyl-2-thiouridinylation	1	1
biological_process	GO:0002939	tRNA N1-guanine methylation	1	1
biological_process	GO:0003017	lymph circulation	1	1
biological_process	GO:0003026	regulation of systemic arterial blood pressure by aortic arch baroreceptor feedback	1	1
biological_process	GO:0003027	regulation of systemic arterial blood pressure by carotid body chemoreceptor signaling	1	1
biological_process	GO:0003029	detection of hypoxic conditions in blood by carotid body chemoreceptor signaling	1	1
biological_process	GO:0003058	hormonal regulation of the force of heart contraction	1	1
biological_process	GO:0003065	positive regulation of heart rate by epinephrine	1	1
biological_process	GO:0003068	regulation of systemic arterial blood pressure by acetylcholine	1	1
biological_process	GO:0003069	acetylcholine-mediated vasodilation involved in regulation of systemic arterial blood pressure	1	1
biological_process	GO:0003070	regulation of systemic arterial blood pressure by neurotransmitter	1	1
biological_process	GO:0003083	negative regulation of renal output by angiotensin	1	1
biological_process	GO:0003106	negative regulation of glomerular filtration by angiotensin	1	1
biological_process	GO:0003108	negative regulation of the force of heart contraction by chemical signal	1	1
biological_process	GO:0003131	mesodermal-endodermal cell signaling	1	1
biological_process	GO:0003136	negative regulation of heart induction by canonical Wnt signaling pathway	1	1
biological_process	GO:0003138	primary heart field specification	1	1
biological_process	GO:0003142	cardiogenic plate morphogenesis	1	1
biological_process	GO:0003144	embryonic heart tube formation	1	1
biological_process	GO:0003147	neural crest cell migration involved in heart formation	1	1
biological_process	GO:0003167	atrioventricular bundle cell differentiation	1	1
biological_process	GO:0003168	Purkinje myocyte differentiation	1	1
biological_process	GO:0003172	sinoatrial valve development	1	1
biological_process	GO:0003178	coronary sinus valve development	1	1
biological_process	GO:0003182	coronary sinus valve morphogenesis	1	1
biological_process	GO:0003185	sinoatrial valve morphogenesis	1	1
biological_process	GO:0003210	cardiac atrium formation	1	1
biological_process	GO:0003226	right ventricular compact myocardium morphogenesis	1	1
biological_process	GO:0003235	sinus venosus development	1	1
biological_process	GO:0003236	sinus venosus morphogenesis	1	1
biological_process	GO:0003247	post-embryonic cardiac muscle cell growth involved in heart morphogenesis	1	1
biological_process	GO:0003251	positive regulation of cell proliferation involved in heart valve morphogenesis	1	1
biological_process	GO:0003259	cardioblast anterior-lateral migration	1	1
biological_process	GO:0003260	cardioblast migration	1	1
biological_process	GO:0003270	Notch signaling pathway involved in regulation of secondary heart field cardioblast proliferation	1	1
biological_process	GO:0003271	smoothened signaling pathway involved in regulation of secondary heart field cardioblast proliferation	1	1
biological_process	GO:0003311	pancreatic D cell differentiation	1	1
biological_process	GO:0003318	cell migration to the midline involved in heart development	1	1
biological_process	GO:0003322	pancreatic A cell development	1	1
biological_process	GO:0003327	type B pancreatic cell fate commitment	1	1
biological_process	GO:0003336	corneocyte desquamation	1	1
biological_process	GO:0003345	proepicardium cell migration involved in pericardium morphogenesis	1	1
biological_process	GO:0003353	positive regulation of cilium movement	1	1
biological_process	GO:0003359	noradrenergic neuron fate commitment	1	1
biological_process	GO:0003363	lamellipodium assembly involved in ameboidal cell migration	1	1
biological_process	GO:0003409	optic cup structural organization	1	1
biological_process	GO:0003421	growth plate cartilage axis specification	1	1
biological_process	GO:0005982	starch metabolic process	1	1
biological_process	GO:0005983	starch catabolic process	1	1
biological_process	GO:0005993	trehalose catabolic process	1	1
biological_process	GO:0005998	xylulose catabolic process	1	1
biological_process	GO:0006049	UDP-N-acetylglucosamine catabolic process	1	1
biological_process	GO:0006055	CMP-N-acetylneuraminate biosynthetic process	1	1
biological_process	GO:0006056	mannoprotein metabolic process	1	1
biological_process	GO:0006057	mannoprotein biosynthetic process	1	1
biological_process	GO:0006061	sorbitol biosynthetic process	1	1
biological_process	GO:0006062	sorbitol catabolic process	1	1
biological_process	GO:0006117	acetaldehyde metabolic process	1	1
biological_process	GO:0006147	guanine catabolic process	1	1
biological_process	GO:0006148	inosine catabolic process	1	1
biological_process	GO:0006157	deoxyadenosine catabolic process	1	1
biological_process	GO:0006173	dADP biosynthetic process	1	1
biological_process	GO:0006174	dADP phosphorylation	1	1
biological_process	GO:0006175	dATP biosynthetic process	1	1
biological_process	GO:0006178	guanine salvage	1	1
biological_process	GO:0006185	dGDP biosynthetic process	1	1
biological_process	GO:0006186	dGDP phosphorylation	1	1
biological_process	GO:0006193	ITP catabolic process	1	1
biological_process	GO:0006214	thymidine catabolic process	1	1
biological_process	GO:0006218	uridine catabolic process	1	1
biological_process	GO:0006253	dCTP catabolic process	1	1
biological_process	GO:0006256	UDP catabolic process	1	1
biological_process	GO:0006274	DNA replication termination	1	1
biological_process	GO:0006386	termination of RNA polymerase III transcription	1	1
biological_process	GO:0006392	transcription elongation from mitochondrial promoter	1	1
biological_process	GO:0006422	aspartyl-tRNA aminoacylation	1	1
[truncated: 20,752 more rows]
