# Supplementary material for: Rapid Identification of Druggable Targets and the Power of the PHENotype SIMulator for Effective Drug Repurposing in COVID-19
Source: Research Square preprint supplement (doi:10.21203/rs.3.rs-287183/v1), 2021-04-14
Supplement: Supplementary file 16 [file A549_MOI_2.xlsx]

## Sheet: MITHrIL
Pathway.Id	Pathway.Name	Impact.Factor	Probability.Pi	Probability.Network	Corrected.Accumulator	pValue	Adjusted.pValue
path:hsa04151	PI3K-Akt signaling pathway	8.503	0.00108486	4.9975e-06	64.9203	6.0675e-08	1.51688e-05
path:hsa01100	Metabolic pathways	7.17173	0.00717301	4.9975e-06	-140.285	6.0246e-07	4.29933e-05
path:hsa04630	JAK-STAT signaling pathway	6.93899	0.00794959	4.9975e-06	51.8947	6.87892e-07	4.29933e-05
path:hsa00100	Steroid biosynthesis	9.21673	0.00479768	4.9975e-06	-32.0933	3.61739e-07	4.29933e-05
path:hsa04213	Longevity regulating pathway - multiple species	11.5952	6.76981e-05	0.00549725	19.7302	3.4507e-06	0.000172535
path:hsa04010	MAPK signaling pathway	9.65995	0.0003814	0.0049975	45.1298	1.3252e-05	0.000552167
path:hsa00970	Aminoacyl-tRNA biosynthesis	9.24605	0.00174003	0.00349825	17.2083	3.54709e-05	0.00126682
path:hsa00900	Terpenoid backbone biosynthesis	6.67451	0.0116037	0.00049975	-16.538	4.21231e-05	0.00131635
path:hsa04072	Phospholipase D signaling pathway	4.58573	0.158755	4.9975e-06	48.2153	6.39926e-05	0.00152708
path:hsa04917	Prolactin signaling pathway	5.93423	0.165542	4.9975e-06	44.1386	6.9273e-05	0.00152708
path:hsa04910	Insulin signaling pathway	3.99771	0.184636	4.9975e-06	41.4945	8.55164e-05	0.00152708
path:hsa04068	FoxO signaling pathway	6.46783	0.0196343	0.00049975	37.6139	7.70225e-05	0.00152708
path:hsa04540	Gap junction	11.9703	4.70448e-05	0.0614693	18.0087	5.85186e-05	0.00152708
path:hsa00360	Phenylalanine metabolism	3.42976	0.178241	4.9975e-06	-9.29206	7.98416e-05	0.00152708
path:hsa04150	mTOR signaling pathway	5.35945	0.0312446	0.00049975	42.89	0.000134187	0.00223645
path:hsa00052	Galactose metabolism	6.33807	0.0164519	0.00149925	-14.7437	0.000154846	0.00241947
path:hsa04014	Ras signaling pathway	5.78708	0.0262995	0.00149925	51.4855	0.000261074	0.00362602
path:hsa04012	ErbB signaling pathway	5.73734	0.0515601	0.00049975	46.3584	0.000251293	0.00362602
path:hsa04210	Apoptosis	7.80452	0.0035885	0.0149925	26.0468	0.000295518	0.0038884
path:hsa04550	Signaling pathways regulating pluripotency of stem cells	5.41675	0.0412564	0.0009995	32.3629	0.000321295	0.00401618
path:hsa04668	TNF signaling pathway	7.19176	0.0101085	0.00749625	29.49	0.000386632	0.00460276
path:hsa04510	Focal adhesion	6.08094	0.0141103	0.00649675	43.6201	0.000469903	0.0053398
path:hsa04211	Longevity regulating pathway	8.53187	0.00253198	0.0364818	17.7007	0.00057731	0.00627511
path:hsa00330	Arginine and proline metabolism	6.34788	0.0146498	0.0124938	-12.7188	0.000885592	0.00922491
path:hsa04064	NF-kappa B signaling pathway	6.66796	0.00840048	0.023988	16.6488	0.00100389	0.0100389
path:hsa04620	Toll-like receptor signaling pathway	3.31196	0.556527	4.9975e-06	35.7181	0.00125157	0.0115886
path:hsa04973	Carbohydrate digestion and absorption	7.66232	0.00417386	0.0494753	9.27642	0.00121544	0.0115886
path:hsa04935	Growth hormone synthesis, secretion and action	5.52415	0.0906276	0.001999	49.4384	0.00143837	0.0122482
path:hsa04380	Osteoclast differentiation	4.67317	0.103763	0.00149925	37.1433	0.00139557	0.0122482
path:hsa00350	Tyrosine metabolism	3.8822	0.132324	0.0009995	-18.8854	0.00146978	0.0122482
path:hsa04664	Fc epsilon RI signaling pathway	4.81443	0.112239	0.00149925	33.1881	0.00155051	0.0125041
path:hsa04140	Autophagy - animal	4.97616	0.135013	0.00149925	42.6727	0.00199749	0.0156054
path:hsa04810	Regulation of actin cytoskeleton	5.61569	0.0211822	0.0244878	33.16	0.00234545	0.0177469
path:hsa00750	Vitamin B6 metabolism	10.5216	0.000149539	0.355822	-0.883797	0.00241358	0.0177469
path:hsa00630	Glyoxylate and dicarboxylate metabolism	4.97795	0.0897402	0.00449775	-15.7307	0.00258448	0.0184606
path:hsa04625	C-type lectin receptor signaling pathway	4.7892	0.172667	0.00149925	41.6885	0.00283833	0.0197106
path:hsa04060	Cytokine-cytokine receptor interaction	2.21122	0.719072	4.9975e-06	35.2795	0.00333078	0.021913
path:hsa04217	Necroptosis	5.59997	0.0400617	0.017991	23.8164	0.00326102	0.021913
path:hsa04218	Cellular senescence	5.5738	0.0381295	0.0209895	25.3273	0.00355514	0.0227894
path:hsa04666	Fc gamma R-mediated phagocytosis	5.20002	0.0668151	0.0144928	25.5685	0.00459754	0.0287346
path:hsa04926	Relaxin signaling pathway	4.56973	0.249647	0.00149925	42.3596	0.00499265	0.030443
path:hsa04621	NOD-like receptor signaling pathway	5.20406	0.0552672	0.0214893	29.8863	0.00524077	0.031195
path:hsa04914	Progesterone-mediated oocyte maturation	4.63908	0.0916613	0.0114943	23.9598	0.0054083	0.0312766
path:hsa04110	Cell cycle	8.44426	0.00122289	0.285857	4.45073	0.00550469	0.0312766
path:hsa04920	Adipocytokine signaling pathway	4.76404	0.385899	0.00049975	21.8826	0.00567181	0.03151
path:hsa04071	Sphingolipid signaling pathway	4.45333	0.204223	0.00349825	35.3409	0.0063586	0.0345576
path:hsa04650	Natural killer cell mediated cytotoxicity	3.86274	0.172667	0.00649675	32.0034	0.00768172	0.0403864
path:hsa04923	Regulation of lipolysis in adipocytes	4.91988	0.0706315	0.0254873	15.5084	0.00775419	0.0403864
path:hsa00240	Pyrimidine metabolism	4.71595	0.0802066	0.0229885	-11.0287	0.00811595	0.0414079
path:hsa04657	IL-17 signaling pathway	6.70452	0.0250308	0.077961	7.76551	0.00845037	0.0422518
path:hsa04960	Aldosterone-regulated sodium reabsorption	3.56666	0.349308	0.00149925	16.5845	0.00883646	0.043316
path:hsa04722	Neurotrophin signaling pathway	4.55441	0.233135	0.00449775	40.4207	0.00908113	0.0436593
path:hsa00980	Metabolism of xenobiotics by cytochrome P450	3.41799	0.142305	0.0134933	-9.78311	0.010156	0.0479054
path:hsa04659	Th17 cell differentiation	4.42774	0.428568	0.0009995	38.0199	0.0103745	0.0480299
path:hsa04015	Rap1 signaling pathway	3.87904	0.152022	0.0144928	38.7104	0.0115777	0.0526258
path:hsa04915	Estrogen signaling pathway	4.09437	0.172673	0.0124938	33.2698	0.0121513	0.0542468
path:hsa04152	AMPK signaling pathway	5.01383	0.0638471	0.0514743	15.125	0.012867	0.0545213
path:hsa04144	Endocytosis	3.98821	0.117878	0.023988	11.8227	0.0126513	0.0545213
path:hsa04145	Phagosome	7.44687	0.00165521	0.413293	-0.291582	0.0128099	0.0545213
path:hsa04750	Inflammatory mediator regulation of TRP channels	4.15203	0.171856	0.0174913	26.1712	0.0153668	0.0640282
path:hsa04122	Sulfur relay system	3.93531	0.0885489	0.0449775	-2.25608	0.0156433	0.0641118
path:hsa00310	Lysine degradation	4.98748	0.0634966	0.0704648	-8.00289	0.0169949	0.0685278
path:hsa03320	PPAR signaling pathway	3.00321	0.273312	0.0089955	-8.47314	0.0179023	0.0710409
path:hsa03460	Fanconi anemia pathway	5.50101	0.0425051	0.121439	6.11187	0.0204943	0.0788244
path:hsa01040	Biosynthesis of unsaturated fatty acids	4.24233	0.131194	0.037981	-5.27756	0.0203124	0.0788244
path:hsa04360	Axon guidance	3.97346	0.144532	0.0349825	25.1871	0.0211258	0.0800221
path:hsa00051	Fructose and mannose metabolism	4.29224	0.132324	0.0414793	-8.43985	0.0219669	0.0819662
path:hsa04137	Mitophagy - animal	5.07561	0.297187	0.0114943	18.4241	0.0236148	0.0851312
path:hsa04066	HIF-1 signaling pathway	4.50506	0.120095	0.051974	16.8195	0.0238367	0.0851312
path:hsa00983	Drug metabolism - other enzymes	3.61856	0.147714	0.0389805	-8.35287	0.0235048	0.0851312
path:hsa04610	Complement and coagulation cascades	4.34058	0.068028	0.09995	6.09278	0.0249724	0.0879309
path:hsa00010	Glycolysis / Gluconeogenesis	4.11939	0.101068	0.069965	-9.13236	0.0258495	0.0897551
path:hsa04966	Collecting duct acid secretion	0	1	0.027986	3.87757	0.027986	0.0958425
path:hsa00400	Phenylalanine, tyrosine and tryptophan biosynthesis	3.19768	0.730265	0.00049975	-5.98316	0.0291814	0.0985859
path:hsa04370	VEGF signaling pathway	4.43239	0.385899	0.0089955	27.2282	0.0301937	0.100646
path:hsa00290	Valine, leucine and isoleucine biosynthesis	3.02868	0.229276	0.029985	2.49744	0.0318546	0.104785
path:hsa04660	T cell receptor signaling pathway	4.08395	0.433218	0.00849575	34.6782	0.0354035	0.114947
path:hsa00532	Glycosaminoglycan biosynthesis - chondroitin sulfate / dermatan sulfate	4.75078	0.0376905	0.236382	1.75024	0.0387794	0.124293
path:hsa00561	Glycerolipid metabolism	4.07573	0.304824	0.0274863	-9.09542	0.042895	0.135744
path:hsa04912	GnRH signaling pathway	5.13662	0.187617	0.0654673	20.5448	0.0450345	0.139914
path:hsa04928	Parathyroid hormone synthesis, secretion and action	4.96061	0.0772221	0.168416	11.5194	0.0458919	0.139914
path:hsa00920	Sulfur metabolism	4.24432	0.344822	0.0234883	-8.95243	0.0457968	0.139914
path:hsa04061	Viral protein interaction with cytokine and cytokine receptor	2.19653	0.822146	0.00049975	18.6145	0.0470861	0.140704
path:hsa00480	Glutathione metabolism	3.64274	0.13888	0.10045	-6.30792	0.0472765	0.140704
path:hsa04662	B cell receptor signaling pathway	3.96295	0.55162	0.00649675	29.6472	0.0479897	0.141146
path:hsa00670	One carbon pool by folate	5.39648	0.025361	0.347826	1.11836	0.0486406	0.141397
path:hsa04062	Chemokine signaling pathway	3.20828	0.742521	0.00149925	60.4706	0.0506908	0.145663
path:hsa01212	Fatty acid metabolism	3.57941	0.546458	0.007996	-17.9239	0.0525133	0.149186
path:hsa00785	Lipoic acid metabolism	4.16989	0.229276	0.0674663	3.18508	0.0569153	0.159875
path:hsa00061	Fatty acid biosynthesis	3.95817	0.251033	0.0629685	-6.41062	0.059766	0.166017
path:hsa04136	Autophagy - other	4.11301	0.397265	0.0314843	9.92799	0.0669422	0.183907
path:hsa01200	Carbon metabolism	4.0047	0.187843	0.113943	-11.6496	0.0695633	0.187802
path:hsa00120	Primary bile acid biosynthesis	3.79517	0.409387	0.0314843	-10.9129	0.0698622	0.187802
path:hsa00072	Synthesis and degradation of ketone bodies	3.42663	0.273613	0.069965	-3.804	0.070869	0.188481
path:hsa03018	RNA degradation	3.29103	0.159595	0.150425	1.26732	0.0755086	0.198707
path:hsa04024	cAMP signaling pathway	2.71992	0.608848	0.0109945	32.0548	0.0771824	0.198924
path:hsa04512	ECM-receptor interaction	3.05006	0.187617	0.128936	5.92418	0.0767831	0.198924
path:hsa00260	Glycine, serine and threonine metabolism	6.08769	0.02829	0.465267	-0.421981	0.0793041	0.202306
path:hsa04919	Thyroid hormone signaling pathway	3.80975	0.485679	0.0269865	24.8653	0.0825653	0.206413
path:hsa04115	p53 signaling pathway	5.24535	0.0430371	0.4003	-1.64857	0.0819114	0.206413
path:hsa00790	Folate biosynthesis	4.19735	0.443228	0.0354823	-10.2704	0.0841334	0.208251
path:hsa04979	Cholesterol metabolism	3.5197	0.149022	0.2004	-1.54554	0.0917677	0.224921
path:hsa00620	Pyruvate metabolism	3.48725	0.454054	0.03998	-8.56586	0.0934669	0.226861
path:hsa04350	TGF-beta signaling pathway	3.70823	0.223448	0.14093	-8.15791	0.0970097	0.230975
path:hsa00030	Pentose phosphate pathway	5.28875	0.0566336	0.3998	-1.26204	0.096914	0.230975
path:hsa04658	Th1 and Th2 cell differentiation	4.07917	0.711517	0.00849575	26.7651	0.0979456	0.231004
path:hsa00982	Drug metabolism - cytochrome P450	1.83283	0.652651	0.0134933	-7.12081	0.0991539	0.231668
path:hsa04530	Tight junction	6.0511	0.0143471	0.652674	3.77575	0.10216	0.236482
path:hsa00062	Fatty acid elongation	4.4397	0.596659	0.021989	-13.1089	0.105414	0.241776
path:hsa04725	Cholinergic synapse	3.90306	0.3759	0.0754623	18.2557	0.10763	0.24424
path:hsa00232	Caffeine metabolism	2.93939	0.229276	0.157421	0.59632	0.108443	0.24424
path:hsa04371	Apelin signaling pathway	3.78406	0.506249	0.0409795	22.8368	0.111444	0.244394
path:hsa04611	Platelet activation	3.87322	0.218187	0.171914	13.7763	0.111283	0.244394
path:hsa00190	Oxidative phosphorylation	2.23892	0.475469	0.0469765	-5.0198	0.109753	0.244394
path:hsa04141	Protein processing in endoplasmic reticulum	4.86848	0.068028	0.411794	-1.16443	0.112818	0.245256
path:hsa00860	Porphyrin and chlorophyll metabolism	3.68522	0.425182	0.0674663	-10.1361	0.11693	0.252004
path:hsa00230	Purine metabolism	2.66842	0.657106	0.01999	-21.6251	0.12175	0.260149
path:hsa00524	Neomycin, kanamycin and gentamicin biosynthesis	2.61535	0.229276	0.193403	-0.715903	0.127962	0.271106
path:hsa00071	Fatty acid degradation	2.6576	0.706213	0.017991	-12.9518	0.135798	0.285291
path:hsa00650	Butanoate metabolism	3.20257	0.503668	0.0614693	-6.2914	0.139127	0.289848
path:hsa00520	Amino sugar and nucleotide sugar metabolism	3.36401	0.366094	0.11944	-7.84236	0.141231	0.291799
path:hsa04623	Cytosolic DNA-sensing pathway	4.23661	0.385978	0.117941	9.67283	0.148452	0.304205
path:hsa04714	Thermogenesis	2.73397	0.500369	0.0754623	12.5956	0.155066	0.315175
path:hsa01230	Biosynthesis of amino acids	6.02006	0.0259986	0.69965	4.21298	0.157708	0.315505
path:hsa04927	Cortisol synthesis and secretion	4.47368	0.150637	0.349825	-3.1551	0.157753	0.315505
path:hsa04670	Leukocyte transendothelial migration	2.43545	0.626257	0.0429785	18.9377	0.161936	0.321302
path:hsa04925	Aldosterone synthesis and secretion	4.03529	0.131007	0.396302	-2.48184	0.16378	0.322401
path:hsa04390	Hippo signaling pathway	2.90654	0.391287	0.156422	10.4007	0.181728	0.353228
path:hsa03440	Homologous recombination	3.90951	0.291825	0.231384	1.63491	0.182266	0.353228
path:hsa00770	Pantothenate and CoA biosynthesis	3.68806	0.351868	0.186407	4.33982	0.184304	0.35443
path:hsa00410	beta-Alanine metabolism	3.76469	0.308423	0.222889	-3.13439	0.185946	0.354859
path:hsa04918	Thyroid hormone synthesis	3.31457	0.275194	0.268866	3.80969	0.19544	0.370021
path:hsa00910	Nitrogen metabolism	3.51807	0.350593	0.205397	2.30982	0.196851	0.370021
path:hsa00601	Glycosphingolipid biosynthesis - lacto and neolacto series	2.5773	0.837934	0.0149925	9.72194	0.201179	0.375335
path:hsa00450	Selenocompound metabolism	3.35362	0.409387	0.175912	3.07846	0.206002	0.381486
path:hsa04978	Mineral absorption	3.37847	0.191185	0.398301	-1.28531	0.211873	0.389472
path:hsa00565	Ether lipid metabolism	2.65319	0.805803	0.0249875	8.75914	0.21883	0.399325
path:hsa04742	Taste transduction	4.317	0.57461	0.101449	-8.01414	0.221433	0.401147
path:hsa04977	Vitamin digestion and absorption	0	1	0.238381	0.671741	0.238381	0.428742
path:hsa00270	Cysteine and methionine metabolism	3.89159	0.172753	0.48076	-0.247057	0.241601	0.431431
path:hsa00130	Ubiquinone and other terpenoid-quinone biosynthesis	2.74852	0.709269	0.067966	-5.27411	0.253159	0.448863
path:hsa04672	Intestinal immune network for IgA production	2.46668	0.747893	0.0569715	3.86345	0.259309	0.455113
path:hsa00380	Tryptophan metabolism	3.38863	0.275194	0.377811	-1.31404	0.260324	0.455113
path:hsa04922	Glucagon signaling pathway	3.90046	0.187617	0.496752	-0.137251	0.263446	0.457371
path:hsa04020	Calcium signaling pathway	2.62418	0.4862	0.203398	8.2649	0.270586	0.466528
path:hsa04724	Glutamatergic synapse	2.82956	0.576409	0.152424	10.2718	0.277834	0.472528
path:hsa04976	Bile secretion	3.04056	0.397265	0.283358	2.40039	0.277846	0.472528
path:hsa04740	Olfactory transduction	2.66877	0.644665	0.118441	-6.82321	0.282959	0.474518
path:hsa00280	Valine, leucine and isoleucine degradation	3.1075	0.469326	0.233383	-5.00946	0.284672	0.474518
path:hsa00600	Sphingolipid metabolism	2.74259	0.479316	0.225887	4.75018	0.284764	0.474518
path:hsa00140	Steroid hormone biosynthesis	2.85514	0.479316	0.229885	-4.46725	0.287948	0.474518
path:hsa00603	Glycosphingolipid biosynthesis - globo and isoglobo series	2.3443	0.409387	0.287856	1.32071	0.288507	0.474518
path:hsa04216	Ferroptosis	3.52282	0.52236	0.204398	-3.21042	0.293073	0.478878
path:hsa00250	Alanine, aspartate and glutamate metabolism	3.41302	0.344202	0.363818	-1.81275	0.298115	0.483952
path:hsa04723	Retrograde endocannabinoid signaling	2.84205	0.48503	0.244878	7.58299	0.303298	0.489191
path:hsa00053	Ascorbate and aldarate metabolism	2.74913	0.749897	0.0824588	-3.03228	0.306685	0.491483
path:hsa04721	Synaptic vesicle cycle	3.56367	0.403259	0.325837	-2.07967	0.311218	0.495571
path:hsa00534	Glycosaminoglycan biosynthesis - heparan sulfate / heparin	4.29031	0.649437	0.144428	2.23976	0.316113	0.497034
path:hsa00500	Starch and sucrose metabolism	2.62556	0.391499	0.342329	-1.75925	0.314933	0.497034
path:hsa04622	RIG-I-like receptor signaling pathway	5.02624	0.829455	0.053973	15.1878	0.321505	0.499231
path:hsa04970	Salivary secretion	3.76703	0.221352	0.543728	0.812344	0.320917	0.499231
path:hsa00471	D-Glutamine and D-glutamate metabolism	0	1	0.331334	0.753628	0.331334	0.511318
path:hsa04215	Apoptosis - multiple species	3.89578	0.475469	0.296852	2.1728	0.336975	0.516833
path:hsa00340	Histidine metabolism	2.85536	0.454106	0.323838	-1.52815	0.342861	0.519486
path:hsa00472	D-Arginine and D-ornithine metabolism	0	1	0.341329	-0.02029	0.341329	0.519486
path:hsa01210	2-Oxocarboxylic acid metabolism	2.92234	0.574819	0.226387	2.59214	0.345501	0.520317
path:hsa00440	Phosphonate and phosphinate metabolism	2.44216	0.730265	0.121439	-1.71435	0.347572	0.520317
path:hsa04392	Hippo signaling pathway - multiple species	2.92842	0.881596	0.0424788	7.0779	0.351392	0.522905
path:hsa04022	cGMP-PKG signaling pathway	2.79281	0.493033	0.341829	-5.12654	0.381906	0.56495
path:hsa04070	Phosphatidylinositol signaling system	3.23719	0.797211	0.106947	12.5265	0.385608	0.567071
path:hsa04614	Renin-angiotensin system	0	1	0.388306	0.148399	0.388306	0.567699
path:hsa03015	mRNA surveillance pathway	1.7225	0.610756	0.252874	1.10442	0.392942	0.571136
path:hsa04744	Phototransduction	6.34811	0.942909	0.0264868	-9.60874	0.400771	0.578028
path:hsa04911	Insulin secretion	3.79118	0.595165	0.277361	-5.11553	0.402307	0.578028
path:hsa03008	Ribosome biogenesis in eukaryotes	1.89675	0.407894	1	0	0.407894	0.582706
path:hsa04913	Ovarian steroidogenesis	3.70087	0.270903	0.621689	1.27547	0.415957	0.590847
path:hsa00020	Citrate cycle (TCA cycle)	3.10636	0.688499	0.232884	-3.64467	0.433237	0.611917
path:hsa04921	Oxytocin signaling pathway	3.05708	0.847059	0.110445	15.8636	0.443694	0.619685
path:hsa04710	Circadian rhythm	2.14809	0.688499	0.242879	2.17572	0.44224	0.619685
path:hsa00040	Pentose and glucuronate interconversions	2.90242	0.926301	0.053973	-4.99968	0.455322	0.632392
path:hsa00830	Retinol metabolism	1.86153	0.610063	0.363818	-1.37106	0.480603	0.663816
path:hsa00510	N-Glycan biosynthesis	3.03892	0.80875	0.190905	-10.2559	0.499642	0.669654
path:hsa04080	Neuroactive ligand-receptor interaction	1.80142	0.846199	0.151424	-8.30561	0.497157	0.669654
path:hsa04728	Dopaminergic synapse	3.07658	0.754087	0.242879	7.94611	0.497273	0.669654
path:hsa03013	RNA transport	1.37619	0.954344	0.0474763	-5.07319	0.505271	0.669654
path:hsa04730	Long-term depression	4.81679	0.332072	0.672664	4.85938	0.50369	0.669654
path:hsa00512	Mucin type O-glycan biosynthesis	2.42499	0.779744	0.224388	-3.34552	0.503913	0.669654
path:hsa00564	Glycerophospholipid metabolism	3.16603	0.361478	0.632684	2.80088	0.495616	0.669654
path:hsa04975	Fat digestion and absorption	4.91559	0.649437	0.358821	-0.546144	0.506259	0.669654
path:hsa04310	Wnt signaling pathway	2.45357	0.80808	0.2009	8.89305	0.509147	0.669931
path:hsa00780	Biotin metabolism	4.83859	0.544397	0.482259	-0.0185931	0.518902	0.679191
path:hsa00220	Arginine biosynthesis	3.65794	0.454106	0.578711	0.697775	0.523485	0.681621
path:hsa04260	Cardiac muscle contraction	4.46117	0.892243	0.146427	-5.0379	0.552504	0.701385
path:hsa04924	Renin secretion	3.16788	0.46015	0.606697	2.21395	0.548027	0.701385
path:hsa00730	Thiamine metabolism	2.99112	0.837804	0.212394	-1.51592	0.552691	0.701385
path:hsa04114	Oocyte meiosis	2.67881	0.506907	0.565717	1.44813	0.551422	0.701385
path:hsa00430	Taurine and hypotaurine metabolism	2.01292	0.650471	0.415292	-0.269993	0.54858	0.701385
path:hsa00591	Linoleic acid metabolism	2.35667	0.942909	0.0834583	3.15715	0.555531	0.701428
path:hsa00590	Arachidonic acid metabolism	2.46153	0.893121	0.161419	-4.79572	0.571451	0.717904
path:hsa04720	Long-term potentiation	2.83495	0.584336	0.525737	0.604052	0.577797	0.722247
path:hsa04726	Serotonergic synapse	3.59445	0.464162	0.65917	4.17332	0.589574	0.729671
path:hsa04972	Pancreatic secretion	3.77813	0.556055	0.568216	1.34208	0.587527	0.729671
path:hsa00760	Nicotinate and nicotinamide metabolism	2.90692	0.854169	0.250875	3.76831	0.606666	0.742271
path:hsa04964	Proximal tubule bicarbonate reclamation	1.77919	0.840318	0.272364	0.899909	0.608662	0.742271
path:hsa04270	Vascular smooth muscle contraction	2.46437	0.627524	0.524738	0.624119	0.607919	0.742271
path:hsa04340	Hedgehog signaling pathway	3.03952	0.896129	0.222889	3.01628	0.637454	0.769872
path:hsa00592	alpha-Linolenic acid metabolism	2.31993	0.52236	0.666667	0.849049	0.634661	0.769872
path:hsa00740	Riboflavin metabolism	3.28221	0.877142	0.281359	0.972696	0.659663	0.792865
path:hsa00513	Various types of N-glycan biosynthesis	2.02111	0.787413	0.422789	1.0871	0.665013	0.79547
path:hsa04962	Vasopressin-regulated water reabsorption	3.12797	0.942909	0.184408	3.67898	0.684928	0.81539
path:hsa04514	Cell adhesion molecules (CAMs)	1.78859	0.684442	0.610195	1.168	0.704501	0.834716
path:hsa04961	Endocrine and other factor-regulated calcium reabsorption	4.10164	0.630648	0.674163	3.61777	0.710581	0.83795
path:hsa04916	Melanogenesis	3.39144	0.962225	0.172414	11.3338	0.721943	0.84236
path:hsa04330	Notch signaling pathway	2.89934	0.92732	0.271864	-3.75609	0.725842	0.84236
path:hsa00604	Glycosphingolipid biosynthesis - ganglio series	2.96286	0.867575	0.398301	-0.886629	0.727799	0.84236
path:hsa04520	Adherens junction	3.73784	0.698912	0.648676	3.35323	0.738436	0.846831
path:hsa04130	SNARE interactions in vesicular transport	1.57639	0.861229	0.422789	-0.376358	0.735685	0.846831
path:hsa04971	Gastric acid secretion	2.83312	0.624467	0.726637	5.33499	0.742306	0.847382
path:hsa04261	Adrenergic signaling in cardiomyocytes	2.48539	0.692059	0.672664	4.90742	0.748899	0.851021
path:hsa00563	Glycosylphosphatidylinositol (GPI)-anchor biosynthesis	3.25598	0.911319	0.351324	-2.67722	0.75298	0.851787
path:hsa04612	Antigen processing and presentation	1.83393	0.909105	0.364318	-0.981868	0.757677	0.85324
path:hsa00640	Propanoate metabolism	4.37957	0.991732	0.136432	-5.28779	0.821085	0.917049
path:hsa00531	Glycosaminoglycan degradation	2.76953	0.912578	0.486757	-0.196518	0.825345	0.917049
path:hsa00515	Mannose type O-glycan biosynthesis	2.16517	0.912578	0.486257	-0.105626	0.825116	0.917049
path:hsa04713	Circadian entrainment	2.75706	0.918159	0.516242	0.441234	0.844625	0.93432
path:hsa04727	GABAergic synapse	2.69671	0.955039	0.692654	3.00538	0.940035	1
path:hsa00562	Inositol phosphate metabolism	4.87043	0.981587	0.626687	3.00333	0.955872	1
path:hsa02010	ABC transporters	0	1	1	0	1	1
path:hsa00514	Other types of O-glycan biosynthesis	0	1	1	0	1	1
path:hsa00511	Other glycan degradation	0	1	1	0	1	1
remaining	remaining	1	1	1	0	1	1
path:hsa03450	Non-homologous end-joining	0	1	1	0	1	1
path:hsa03420	Nucleotide excision repair	0	1	1	0	1	1
path:hsa04640	Hematopoietic cell lineage	0	1	1	0	1	1
path:hsa03430	Mismatch repair	0	1	1	0	1	1
path:hsa04974	Protein digestion and absorption	0	1	1	0	1	1
path:hsa03410	Base excision repair	0	1	1	0	1	1
path:hsa03060	Protein export	0	1	1	0	1	1
path:hsa03040	Spliceosome	0	1	1	0	1	1
path:hsa03050	Proteasome	0	1	1	0	1	1
path:hsa04146	Peroxisome	0	1	1	0	1	1
path:hsa04142	Lysosome	0	1	1	0	1	1
path:hsa03020	RNA polymerase	0	1	1	0	1	1
path:hsa03022	Basal transcription factors	0	1	1	0	1	1
path:hsa03030	DNA replication	0	1	1	0	1	1
path:hsa04120	Ubiquitin mediated proteolysis	0	1	1	0	1	1
path:hsa04929	GnRH secretion	0	1	1	0	1	1
path:hsa00533	Glycosaminoglycan biosynthesis - keratan sulfate	0	1	1	0	1	1
path:hsa03010	Ribosome	0	1	1	0	1	1

## Sheet: SPIA
Name	ID	pSize	NDE	pNDE	tA	pPERT	pG	pGFdr	pGFWER	Status
MAPK signaling pathway	04010	234	70	0.00876686	52.4444	5e-06	7.86512e-07	0.000107752	0.000107752	Activated
Small cell lung cancer	05222	82	34	0.000153309	40.6683	0.004	9.38528e-06	0.000546167	0.00128578	Activated
Cytokine-cytokine receptor interaction	04060	202	53	0.158988	45.6284	5e-06	1.19599e-05	0.000546167	0.0016385	Activated
Gap junction	04540	76	33	6.49049e-05	26.4	0.078	6.67939e-05	0.00228769	0.00915076	Activated
Pathways in cancer	05200	296	88	0.0044032	74.6826	0.01	0.000485699	0.0133082	0.0665408	Activated
Focal adhesion	04510	192	56	0.0285963	63.4229	0.002	0.000615912	0.0140633	0.0843799	Activated
Pathogenic Escherichia coli infection	05130	52	20	0.00900394	-26.2791	0.014	0.00125788	0.0246185	0.172329	Inhibited
Melanoma	05218	60	22	0.0119082	44.7387	0.013	0.00151298	0.0259097	0.207278	Activated
Cell cycle	04110	121	43	0.00122289	18.7384	0.146	0.00171948	0.0261744	0.235569	Activated
Carbohydrate digestion and absorption	04973	32	14	0.00759128	-4.8948	0.066	0.00430823	0.0590228	0.590228	Inhibited
NF-kappa B signaling pathway	04064	85	29	0.0131646	19.3195	0.074	0.00772906	0.0962619	1	Activated
ErbB signaling pathway	04012	86	26	0.0755158	38.7409	0.017	0.00983104	0.104286	1	Activated
Pancreatic cancer	05212	69	23	0.0331425	18.8563	0.042	0.0105471	0.104286	1	Activated
Prostate cancer	05215	86	32	0.00212473	7.4613	0.663	0.0106569	0.104286	1	Activated
Toxoplasmosis	05145	121	38	0.0212573	-13.1315	0.168	0.0236945	0.207446	1	Inhibited
Glioma	05214	65	20	0.094	28.7625	0.039	0.0242273	0.207446	1	Activated
Fanconi anemia pathway	03460	46	18	0.0105485	-1.97115	0.432	0.029124	0.234705	1	Inhibited
Non-small cell lung cancer	05223	53	18	0.0464448	20.6018	0.135	0.0380715	0.289767	1	Activated
Prion diseases	05020	30	13	0.0109311	2.38457	0.718	0.0458936	0.315414	1	Activated
ECM-receptor interaction	04512	79	22	0.187617	10.3202	0.042	0.0460458	0.315414	1	Activated
Rheumatoid arthritis	05323	83	27	0.0304741	2.15668	0.286	0.0500505	0.326216	1	Activated
Axon guidance	04360	122	35	0.0866432	15.0468	0.11	0.0538795	0.326216	1	Activated
HTLV-I infection	05166	245	71	0.0177728	7.21233	0.547	0.0547662	0.326216	1	Activated
Measles	05162	116	36	0.0291734	7.82071	0.363	0.0587514	0.335373	1	Activated
Osteoclast differentiation	04380	127	35	0.135199	18.2545	0.09	0.0658156	0.360669	1	Activated
Regulation of actin cytoskeleton	04810	190	54	0.0487512	17.7468	0.275	0.0712159	0.375253	1	Activated
Tight junction	04530	110	34	0.0352161	4.85575	0.439	0.0799199	0.40206	1	Activated
Mineral absorption	04978	45	12	0.335177	1.4158	0.052	0.0880107	0.40206	1	Activated
GnRH signaling pathway	04912	85	21	0.399095	32.1544	0.045	0.0901492	0.40206	1	Activated
Dorso-ventral axis formation	04320	22	9	0.047209	1.12026	0.387	0.0913951	0.40206	1	Activated
p53 signaling pathway	04115	64	21	0.0476376	-4.03337	0.413	0.0969637	0.40206	1	Inhibited
Apoptosis	04210	80	25	0.0569084	10.513	0.353	0.0985871	0.40206	1	Activated
Salivary secretion	04970	66	21	0.0644307	-3.8907	0.326	0.102145	0.40206	1	Inhibited
Staphylococcus aureus infection	05150	48	9	0.80875	14.5487	0.027	0.105342	0.40206	1	Activated
African trypanosomiasis	05143	32	11	0.0980963	2.37264	0.229	0.107734	0.40206	1	Activated
Sulfur relay system	04122	10	4	0.180425	-3.2252	0.126	0.108755	0.40206	1	Inhibited
mTOR signaling pathway	04150	61	19	0.0910969	4.14069	0.256	0.11097	0.40206	1	Activated
Chronic myeloid leukemia	05220	73	22	0.0989429	10.0077	0.242	0.113305	0.40206	1	Activated
Chemokine signaling pathway	04062	160	34	0.734938	32.4306	0.033	0.114455	0.40206	1	Activated
Tuberculosis	05152	162	42	0.215917	24.3336	0.118	0.118982	0.407512	1	Activated
Viral myocarditis	05416	61	13	0.674888	9.61723	0.042	0.129348	0.422525	1	Activated
Progesterone-mediated oocyte maturation	04914	80	25	0.0569084	-4.00509	0.499	0.129533	0.422525	1	Inhibited
Epstein-Barr virus infection	05169	193	56	0.0314781	0.330122	0.968	0.136844	0.435991	1	Activated
Amoebiasis	05146	98	30	0.0514567	-1.97396	0.668	0.150227	0.458724	1	Inhibited
Pertussis	05133	69	14	0.750138	13.4893	0.046	0.150676	0.458724	1	Activated
Cocaine addiction	05030	43	13	0.172753	5.75747	0.209	0.156022	0.464675	1	Activated
Systemic lupus erythematosus	05322	106	22	0.747753	6.28839	0.05	0.160259	0.467138	1	Activated
Leukocyte transendothelial migration	04670	104	22	0.713399	-24.1263	0.056	0.168595	0.48018	1	Inhibited
Epithelial cell signaling in Helicobacter pylori infection	05120	65	17	0.319779	8.9828	0.128	0.171743	0.48018	1	Activated
Bacterial invasion of epithelial cells	05100	68	18	0.292895	-20.2139	0.149	0.180315	0.494063	1	Inhibited
Arrhythmogenic right ventricular cardiomyopathy (ARVC)	05412	66	19	0.167209	-1.00639	0.289	0.194735	0.511863	1	Inhibited
Jak-STAT signaling pathway	04630	121	36	0.0525677	0.291109	0.933	0.196918	0.511863	1	Activated
NOD-like receptor signaling pathway	04621	54	18	0.0551467	-0.685084	0.896	0.19802	0.511863	1	Inhibited
Chagas disease (American trypanosomiasis)	05142	98	29	0.0802265	-5.01454	0.666	0.209949	0.532649	1	Inhibited
Alzheimer's disease	05010	142	39	0.125164	-3.52508	0.548	0.252384	0.628391	1	Inhibited
Malaria	05144	45	12	0.335177	-1.93895	0.21	0.257177	0.628391	1	Inhibited
Bile secretion	04976	54	15	0.248184	-2.17039	0.296	0.265271	0.628391	1	Inhibited
Oocyte meiosis	04114	100	26	0.275233	12.8453	0.27	0.267487	0.628391	1	Activated
Influenza A	05164	151	42	0.0986503	-2.32967	0.777	0.273529	0.628391	1	Inhibited
Maturity onset diabetes of the young	04950	16	5	0.300801	-4.23373	0.257	0.275208	0.628391	1	Inhibited
T cell receptor signaling pathway	04660	102	24	0.492719	13.9909	0.171	0.292694	0.639289	1	Activated
Regulation of autophagy	04140	22	3	0.911319	4.4433	0.094	0.296168	0.639289	1	Activated
Cytosolic DNA-sensing pathway	04623	49	15	0.13888	1.13742	0.651	0.307703	0.639289	1	Activated
Legionellosis	05134	53	16	0.142305	2.32851	0.643	0.31032	0.639289	1	Activated
Neurotrophin signaling pathway	04722	117	32	0.15894	-7.71569	0.583	0.313086	0.639289	1	Inhibited
Adipocytokine signaling pathway	04920	61	16	0.322812	-4.518	0.289	0.314584	0.639289	1	Inhibited
Salmonella infection	05132	79	21	0.265057	6.1428	0.354	0.315857	0.639289	1	Activated
Natural killer cell mediated cytotoxicity	04650	107	27	0.330229	29.0598	0.286	0.317312	0.639289	1	Activated
Renal cell carcinoma	05211	65	19	0.149835	-2.70919	0.658	0.327005	0.641243	1	Inhibited
RNA degradation	03018	62	15	0.464162	1.33671	0.213	0.327642	0.641243	1	Activated
Parkinson's disease	05012	97	27	0.158183	-2.54105	0.656	0.338865	0.653866	1	Inhibited
Protein processing in endoplasmic reticulum	04141	155	40	0.232466	-3.40915	0.471	0.351677	0.669163	1	Inhibited
Transcriptional misregulation in cancer	05202	155	38	0.361585	-0.82249	0.309	0.356605	0.669245	1	Inhibited
Endometrial cancer	05213	51	12	0.521981	10.4745	0.233	0.377859	0.694524	1	Activated
Hepatitis C	05160	114	31	0.172353	2.61853	0.713	0.380521	0.694524	1	Activated
Huntington's disease	05016	158	43	0.12517	0	1	0.385283	0.694524	1	Inhibited
Complement and coagulation cascades	04610	58	17	0.163533	3.28249	0.815	0.401879	0.712836	1	Activated
VEGF signaling pathway	04370	66	13	0.783709	10.0787	0.173	0.406498	0.712836	1	Activated
Fc gamma R-mediated phagocytosis	04666	89	25	0.157148	1.63311	0.887	0.414055	0.712836	1	Activated
Cholinergic synapse	04725	95	23	0.433218	10.576	0.325	0.416819	0.712836	1	Activated
Herpes simplex infection	05168	161	42	0.203079	3.42151	0.716	0.425779	0.712836	1	Activated
Insulin signaling pathway	04910	127	34	0.184636	-5.38408	0.79	0.426661	0.712836	1	Inhibited
Aldosterone-regulated sodium reabsorption	04960	34	8	0.540021	2.22423	0.284	0.440916	0.722469	1	Activated
Acute myeloid leukemia	05221	57	15	0.325876	3.62524	0.474	0.442973	0.722469	1	Activated
B cell receptor signaling pathway	04662	73	17	0.52637	8.66748	0.31	0.459	0.730806	1	Activated
Circadian rhythm - mammal	04710	22	4	0.7815	3.75929	0.21	0.460702	0.730806	1	Activated
Fc epsilon RI signaling pathway	04664	67	19	0.185597	1.49794	0.901	0.466289	0.730806	1	Activated
Viral carcinogenesis	05203	189	46	0.363399	-0.662532	0.465	0.469423	0.730806	1	Inhibited
Bladder cancer	05219	40	11	0.30632	3.42887	0.578	0.483586	0.744397	1	Activated
Thyroid cancer	05216	27	2	0.992345	2.39879	0.201	0.52102	0.793108	1	Activated
Long-term depression	04730	54	12	0.610059	7.03636	0.361	0.553458	0.824744	1	Activated
Type II diabetes mellitus	04930	41	10	0.479316	-4.70942	0.46	0.553842	0.824744	1	Inhibited
Endocrine and other factor-regulated calcium reabsorption	04961	43	12	0.275244	0.636196	0.871	0.582133	0.857551	1	Activated
TGF-beta signaling pathway	04350	79	18	0.566209	-5.22762	0.499	0.63965	0.909583	1	Inhibited
Long-term potentiation	04720	64	14	0.636371	10.4503	0.446	0.641269	0.909583	1	Activated
Serotonergic synapse	04726	89	16	0.900113	4.08302	0.317	0.643172	0.909583	1	Activated
Amyotrophic lateral sclerosis (ALS)	05014	50	11	0.624467	-3.62114	0.458	0.644012	0.909583	1	Inhibited
Amphetamine addiction	05031	62	11	0.876253	4.03161	0.346	0.665008	0.924608	1	Activated
Olfactory transduction	04740	31	5	0.873782	-3.00489	0.35	0.668147	0.924608	1	Inhibited
Colorectal cancer	05210	61	15	0.436292	1.49301	0.715	0.675343	0.925219	1	Activated
Toll-like receptor signaling pathway	04620	87	20	0.547311	5.1106	0.605	0.697102	0.928088	1	Activated
Leishmaniasis	05140	68	17	0.396568	1.01918	0.849	0.703204	0.928088	1	Activated
Morphine addiction	05032	68	11	0.937338	2.19983	0.363	0.707069	0.928088	1	Activated
Shigellosis	05131	59	14	0.501202	-2.49003	0.679	0.707136	0.928088	1	Inhibited
RIG-I-like receptor signaling pathway	04622	55	10	0.846511	-3.38861	0.419	0.722328	0.928088	1	Inhibited
Calcium signaling pathway	04020	151	36	0.43985	1.87765	0.809	0.723519	0.928088	1	Activated
Phosphatidylinositol signaling system	04070	79	20	0.357136	0	1	0.724857	0.928088	1	Inhibited
Basal cell carcinoma	05217	49	9	0.828214	-6.13366	0.448	0.738906	0.934635	1	Inhibited
Alcoholism	05034	149	30	0.827799	9.87225	0.454	0.743615	0.934635	1	Activated
Antigen processing and presentation	04612	59	13	0.62373	-1.02727	0.618	0.752931	0.935837	1	Inhibited
Pancreatic secretion	04972	72	18	0.39107	0	1	0.758233	0.935837	1	Inhibited
Wnt signaling pathway	04310	138	27	0.860297	4.70648	0.495	0.789382	0.959859	1	Activated
Vasopressin-regulated water reabsorption	04962	40	8	0.734227	1.10526	0.591	0.796205	0.959859	1	Activated
Vibrio cholerae infection	05110	51	11	0.652651	0.139237	0.671	0.799526	0.959859	1	Activated
Melanogenesis	04916	88	14	0.962225	-12.2295	0.463	0.805721	0.959859	1	Inhibited
Lysosome	04142	118	28	0.466057	0	1	0.821867	0.968958	1	Inhibited
Dilated cardiomyopathy	05414	77	17	0.62429	-0.600477	0.76	0.828207	0.968958	1	Inhibited
Phototransduction	04744	20	4	0.710454	1.30433	0.68	0.834577	0.968958	1	Activated
Dopaminergic synapse	04728	115	23	0.812408	1.73778	0.655	0.867832	0.9991	1	Activated
Glutamatergic synapse	04724	93	18	0.834365	1.49015	0.657	0.877718	0.999921	1	Activated
Gastric acid secretion	04971	62	13	0.698912	0.588448	0.841	0.90013	0.999921	1	Activated
PPAR signaling pathway	03320	55	12	0.637646	0	1	0.924569	0.999921	1	Inhibited
Intestinal immune network for IgA production	04672	37	8	0.644665	0	1	0.927689	0.999921	1	Inhibited
Vascular smooth muscle contraction	04270	96	20	0.734252	-1.46066	0.885	0.929928	0.999921	1	Inhibited
Taste transduction	04742	24	5	0.678978	-0.0382135	0.99	0.939193	0.999921	1	Inhibited
SNARE interactions in vesicular transport	04130	36	6	0.86869	-0.653923	0.779	0.940973	0.999921	1	Inhibited
Graft-versus-host disease	05332	30	6	0.72161	0	1	0.95705	0.999921	1	Inhibited
Type I diabetes mellitus	04940	36	7	0.75603	0	1	0.967472	0.999921	1	Inhibited
GABAergic synapse	04727	66	10	0.958505	0.465429	0.8	0.970409	0.999921	1	Activated
Hedgehog signaling pathway	04340	47	7	0.939999	0.841608	0.834	0.974774	0.999921	1	Activated
RNA transport	03013	140	28	0.831638	0	1	0.984957	0.999921	1	Inhibited
Notch signaling pathway	04330	45	6	0.965119	-1.082	0.869	0.986227	0.999921	1	Inhibited
Neuroactive ligand-receptor interaction	04080	166	33	0.857866	0	1	0.989383	0.999921	1	Inhibited
Retrograde endocannabinoid signaling	04723	74	11	0.970394	-0.00495397	0.977	0.998628	0.999921	1	Inhibited
Asthma	05310	21	2	0.970355	0	1	0.999556	0.999921	1	Inhibited
Allograft rejection	05330	30	3	0.981179	0	1	0.999822	0.999921	1	Inhibited
Autoimmune thyroid disease	05320	32	3	0.987485	0	1	0.999921	0.999921	1	Inhibited

## Sheet: Reactome
ID	Description	setSize	enrichmentScore	NES	pvalue	p.adjust	qvalues
R-HSA-69278	Cell Cycle, Mitotic	184	-0.39774	-2.65376	0.0017331	0.0165945	0.0125968
R-HSA-1640170	Cell Cycle	209	-0.380366	-2.60543	0.00174216	0.0165945	0.0125968
R-HSA-8953854	Metabolism of RNA	162	-0.278434	-1.81849	0.00177305	0.0165945	0.0125968
R-HSA-68886	M Phase	109	-0.391982	-2.38139	0.00178891	0.0165945	0.0125968
R-HSA-1500620	Meiosis	23	-0.486377	-1.9902	0.00179211	0.0165945	0.0125968
R-HSA-176187	Activation of ATR in response to replication stress	23	-0.593904	-2.43019	0.00179211	0.0165945	0.0125968
R-HSA-73772	RNA Polymerase I Promoter Escape	23	-0.532105	-2.17731	0.00179211	0.0165945	0.0125968
R-HSA-5617472	Activation of anterior HOX genes in hindbrain development during early embryogenesis	23	-0.538927	-2.20523	0.00179211	0.0165945	0.0125968
R-HSA-5619507	Activation of HOX genes during differentiation	23	-0.538927	-2.20523	0.00179211	0.0165945	0.0125968
R-HSA-5693567	HDR through Homologous Recombination (HRR) or Single Strand Annealing (SSA)	46	-0.429578	-2.13748	0.00179533	0.0165945	0.0125968
R-HSA-375276	Peptide ligand-binding receptors	24	-0.516387	-2.12097	0.00179856	0.0165945	0.0125968
R-HSA-68867	Assembly of the pre-replicative complex	24	-0.502855	-2.06539	0.00179856	0.0165945	0.0125968
R-HSA-5250913	Positive epigenetic regulation of rRNA expression	24	-0.545034	-2.23863	0.00179856	0.0165945	0.0125968
R-HSA-5693532	DNA Double-Strand Break Repair	52	-0.419735	-2.14579	0.00180505	0.0165945	0.0125968
R-HSA-69481	G2/M Checkpoints	52	-0.47395	-2.42295	0.00180505	0.0165945	0.0125968
R-HSA-5693538	Homology Directed Repair	48	-0.436548	-2.184	0.00180832	0.0165945	0.0125968
R-HSA-201681	TCF dependent signaling in response to WNT	45	-0.398624	-1.95932	0.00181488	0.0165945	0.0125968
R-HSA-211000	Gene Silencing by RNA	26	-0.528848	-2.21855	0.00182149	0.0165945	0.0125968
R-HSA-69190	DNA strand elongation	26	-0.586048	-2.45851	0.00182149	0.0165945	0.0125968
R-HSA-211859	Biological oxidations	42	-0.44229	-2.13458	0.00182482	0.0165945	0.0125968
R-HSA-8957322	Metabolism of steroids	42	-0.431156	-2.08085	0.00182482	0.0165945	0.0125968
R-HSA-5578749	Transcriptional regulation by small RNAs	22	-0.566295	-2.29084	0.00182482	0.0165945	0.0125968
R-HSA-3214847	HATs acetylate histones	22	-0.502589	-2.03313	0.00182482	0.0165945	0.0125968
R-HSA-180786	Extension of Telomeres	22	-0.532427	-2.15384	0.00182482	0.0165945	0.0125968
R-HSA-69242	S Phase	69	-0.388709	-2.14294	0.00182815	0.0165945	0.0125968
R-HSA-68877	Mitotic Prometaphase	64	-0.412352	-2.23455	0.0018315	0.0165945	0.0125968
R-HSA-72203	Processing of Capped Intron-Containing Pre-mRNA	64	-0.397035	-2.15155	0.0018315	0.0165945	0.0125968
R-HSA-69206	G1/S Transition	54	-0.383061	-1.96987	0.00183486	0.0165945	0.0125968
R-HSA-72163	mRNA Splicing - Major Pathway	54	-0.386129	-1.98565	0.00183486	0.0165945	0.0125968
R-HSA-69306	DNA Replication	59	-0.464714	-2.44363	0.00183486	0.0165945	0.0125968
R-HSA-212300	PRC2 methylates histones and DNA	15	-0.685561	-2.43094	0.00183486	0.0165945	0.0125968
R-HSA-427359	SIRT1 negatively regulates rRNA expression	15	-0.627727	-2.22587	0.00183486	0.0165945	0.0125968
R-HSA-5625740	RHO GTPases activate PKNs	15	-0.67479	-2.39275	0.00183486	0.0165945	0.0125968
R-HSA-8936459	RUNX1 regulates genes involved in megakaryocyte differentiation and platelet function	15	-0.673048	-2.38657	0.00183486	0.0165945	0.0125968
R-HSA-453279	Mitotic G1-G1/S phases	62	-0.406872	-2.17589	0.00183824	0.0165945	0.0125968
R-HSA-73933	Resolution of Abasic Sites (AP sites)	20	-0.497223	-1.94908	0.00183824	0.0165945	0.0125968
R-HSA-1912422	Pre-NOTCH Expression and Processing	20	-0.57684	-2.26117	0.00183824	0.0165945	0.0125968
R-HSA-2555396	Mitotic Metaphase and Anaphase	62	-0.399505	-2.1365	0.00183824	0.0165945	0.0125968
R-HSA-5663220	RHO GTPases Activate Formins	43	-0.43807	-2.12952	0.00183824	0.0165945	0.0125968
R-HSA-68882	Mitotic Anaphase	62	-0.399505	-2.1365	0.00183824	0.0165945	0.0125968
R-HSA-68962	Activation of the pre-replicative complex	21	-0.601708	-2.39127	0.00184162	0.0165945	0.0125968
R-HSA-5250924	B-WICH complex positively regulates rRNA expression	21	-0.571002	-2.26924	0.00184162	0.0165945	0.0125968
R-HSA-141424	Amplification of signal from the kinetochores	27	-0.525868	-2.23392	0.00184502	0.0165945	0.0125968
R-HSA-141444	Amplification of signal from unattached kinetochores via a MAD2 inhibitory signal	27	-0.525868	-2.23392	0.00184502	0.0165945	0.0125968
R-HSA-2467813	Separation of Sister Chromatids	55	-0.4238	-2.18577	0.00184502	0.0165945	0.0125968
R-HSA-2559580	Oxidative Stress Induced Senescence	27	-0.562325	-2.38879	0.00184502	0.0165945	0.0125968
R-HSA-72172	mRNA Splicing	55	-0.388212	-2.00222	0.00184502	0.0165945	0.0125968
R-HSA-5250941	Negative epigenetic regulation of rRNA expression	27	-0.493675	-2.09716	0.00184502	0.0165945	0.0125968
R-HSA-73864	RNA Polymerase I Transcription	27	-0.499343	-2.12124	0.00184502	0.0165945	0.0125968
R-HSA-69239	Synthesis of DNA	55	-0.453112	-2.33695	0.00184502	0.0165945	0.0125968
R-HSA-73854	RNA Polymerase I Promoter Clearance	27	-0.499343	-2.12124	0.00184502	0.0165945	0.0125968
R-HSA-195258	RHO GTPase Effectors	76	-0.399234	-2.24451	0.00184843	0.0165945	0.0125968
R-HSA-69620	Cell Cycle Checkpoints	89	-0.440929	-2.55036	0.00184843	0.0165945	0.0125968
R-HSA-201722	Formation of the beta-catenin:TCF transactivating complex	14	-0.68547	-2.3564	0.00184843	0.0165945	0.0125968
R-HSA-427389	ERCC6 (CSB) and EHMT2 (G9a) positively regulate rRNA expression	14	-0.666656	-2.29172	0.00184843	0.0165945	0.0125968
R-HSA-5334118	DNA methylation	14	-0.692999	-2.38228	0.00184843	0.0165945	0.0125968
R-HSA-69618	Mitotic Spindle Checkpoint	32	-0.484371	-2.17681	0.00185185	0.0165945	0.0125968
R-HSA-157579	Telomere Maintenance	32	-0.525749	-2.36277	0.00185185	0.0165945	0.0125968
R-HSA-73884	Base Excision Repair	31	-0.492841	-2.18178	0.00185874	0.0165945	0.0125968
R-HSA-9018519	Estrogen-dependent gene expression	31	-0.488569	-2.16287	0.00185874	0.0165945	0.0125968
R-HSA-2500257	Resolution of Sister Chromatid Cohesion	39	-0.508694	-2.41029	0.00186567	0.0165945	0.0125968
R-HSA-73886	Chromosome Maintenance	41	-0.528652	-2.50619	0.0018797	0.0165945	0.0125968
R-HSA-2299718	Condensation of Prophase Chromosomes	16	-0.655381	-2.36624	0.00188324	0.0165945	0.0125968
R-HSA-191273	Cholesterol biosynthesis	16	-0.651944	-2.35383	0.00188324	0.0165945	0.0125968
R-HSA-73894	DNA Repair	91	-0.359926	-2.07919	0.00189036	0.0165945	0.0125968
R-HSA-5625886	Activated PKN1 stimulates transcription of AR (androgen receptor) regulated genes KLK2 and KLK3	11	-0.76192	-2.3817	0.00189036	0.0165945	0.0125968
R-HSA-73728	RNA Polymerase I Promoter Opening	11	-0.76192	-2.3817	0.00189036	0.0165945	0.0125968
R-HSA-176974	Unwinding of DNA	11	-0.757928	-2.36922	0.00189036	0.0165945	0.0125968
R-HSA-212165	Epigenetic regulation of gene expression	35	-0.491697	-2.23764	0.00189394	0.0165945	0.0125968
R-HSA-606279	Deposition of new CENPA-containing nucleosomes at the centromere	18	-0.607846	-2.29494	0.0019084	0.0165945	0.0125968
R-HSA-774815	Nucleosome assembly	18	-0.607846	-2.29494	0.0019084	0.0165945	0.0125968
R-HSA-174417	Telomere C-strand (Lagging Strand) Synthesis	18	-0.526142	-1.98647	0.0019084	0.0165945	0.0125968
R-HSA-1912408	Pre-NOTCH Transcription and Translation	19	-0.598393	-2.28705	0.00191205	0.0165945	0.0125968
R-HSA-9616222	Transcriptional regulation of granulopoiesis	19	-0.575859	-2.20093	0.00191205	0.0165945	0.0125968
R-HSA-977225	Amyloid fiber formation	17	-0.616784	-2.27102	0.00191571	0.0165945	0.0125968
R-HSA-912446	Meiotic recombination	17	-0.621239	-2.28742	0.00191571	0.0165945	0.0125968
R-HSA-3214815	HDACs deacetylate histones	17	-0.612304	-2.25452	0.00191571	0.0165945	0.0125968
R-HSA-198933	Immunoregulatory interactions between a Lymphoid and a non-Lymphoid cell	19	0.601777	2.34761	0.00208768	0.0176633	0.0134081
R-HSA-9614085	FOXO-mediated transcription	18	0.53301	2.03408	0.00209205	0.0176633	0.0134081
R-HSA-6783783	Interleukin-10 signaling	13	0.72176	2.48552	0.0021322	0.0177772	0.0134946
R-HSA-3000171	Non-integrin membrane-ECM interactions	20	0.555964	2.18194	0.00218341	0.0179794	0.0136481
R-HSA-1474290	Collagen formation	23	0.491825	2.0183	0.00225225	0.018264	0.0138641
R-HSA-449147	Signaling by Interleukins	115	0.349803	2.22922	0.00227273	0.018264	0.0138641
R-HSA-1280215	Cytokine Signaling in Immune system	208	0.31791	2.28427	0.00235849	0.0187275	0.014216
R-HSA-168256	Immune System	469	0.24143	1.93717	0.00265957	0.0208698	0.0158422
R-HSA-500792	GPCR ligand binding	51	-0.363178	-1.84616	0.00356506	0.0239712	0.0181964
R-HSA-5419276	Mitochondrial translation termination	24	-0.47807	-1.96359	0.00359712	0.0239712	0.0181964
R-HSA-427413	NoRC negatively regulates rRNA expression	26	-0.480848	-2.01719	0.00364299	0.0239712	0.0181964
R-HSA-194315	Signaling by Rho GTPases	104	-0.314848	-1.88256	0.003663	0.0239712	0.0181964
R-HSA-110328	Recognition and association of DNA glycosylase with site containing an affected pyrimidine	15	-0.583986	-2.07076	0.00366972	0.0239712	0.0181964
R-HSA-110329	Cleavage of the damaged pyrimidine	15	-0.583986	-2.07076	0.00366972	0.0239712	0.0181964
R-HSA-1221632	Meiotic synapsis	15	-0.552176	-1.95797	0.00366972	0.0239712	0.0181964
R-HSA-73928	Depyrimidination	15	-0.583986	-2.07076	0.00366972	0.0239712	0.0181964
R-HSA-73929	Base-Excision Repair, AP Site Formation	15	-0.583986	-2.07076	0.00366972	0.0239712	0.0181964
R-HSA-69205	G1/S-Specific Transcription	14	-0.621787	-2.13748	0.00369686	0.0239712	0.0181964
R-HSA-373076	Class A/1 (Rhodopsin-like receptors)	37	-0.438387	-2.04207	0.0037037	0.0239712	0.0181964
R-HSA-5693571	Nonhomologous End-Joining (NHEJ)	12	-0.628718	-2.04053	0.00371058	0.0239712	0.0181964
R-HSA-110330	Recognition and association of DNA glycosylase with site containing an affected purine	12	-0.684973	-2.22311	0.00371058	0.0239712	0.0181964
R-HSA-110331	Cleavage of the damaged purine	12	-0.684973	-2.22311	0.00371058	0.0239712	0.0181964
R-HSA-73927	Depurination	12	-0.684973	-2.22311	0.00371058	0.0239712	0.0181964
R-HSA-68875	Mitotic Prophase	31	-0.45938	-2.03365	0.00371747	0.0239712	0.0181964
R-HSA-5693565	Recruitment and ATM-mediated phosphorylation of repair and signaling proteins at DNA double strand breaks	13	-0.60135	-2.00419	0.00375235	0.0239712	0.0181964
R-HSA-69002	DNA Replication Pre-Initiation	34	-0.462146	-2.09455	0.0037594	0.0239712	0.0181964
R-HSA-2426168	Activation of gene expression by SREBF (SREBP)	16	-0.570585	-2.06009	0.00376648	0.0239712	0.0181964
R-HSA-3214858	RMTs methylate histone arginines	10	-0.653505	-1.97783	0.00380952	0.0239712	0.0181964
R-HSA-171306	Packaging Of Telomere Ends	10	-0.754622	-2.28386	0.00380952	0.0239712	0.0181964
R-HSA-1474244	Extracellular matrix organization	73	0.381628	2.18586	0.00431965	0.0267356	0.0202948
R-HSA-6785807	Interleukin-4 and Interleukin-13 signaling	32	0.480557	2.17727	0.004329	0.0267356	0.0202948
R-HSA-877300	Interferon gamma signaling	24	0.465597	1.94536	0.0044843	0.0274407	0.02083
R-HSA-168249	Innate Immune System	214	0.231907	1.68179	0.00460829	0.027943	0.0212114
R-HSA-611105	Respiratory electron transport	24	-0.445724	-1.83073	0.00539568	0.0307383	0.0233332
R-HSA-1474165	Reproduction	25	-0.440041	-1.82441	0.00548446	0.0307383	0.0233332
R-HSA-5389840	Mitochondrial translation elongation	25	-0.462572	-1.91782	0.00548446	0.0307383	0.0233332
R-HSA-69473	G2/M DNA damage checkpoint	25	-0.437217	-1.8127	0.00548446	0.0307383	0.0233332
R-HSA-3247509	Chromatin modifying enzymes	47	-0.367199	-1.81905	0.00548446	0.0307383	0.0233332
R-HSA-4839726	Chromatin organization	47	-0.367199	-1.81905	0.00548446	0.0307383	0.0233332
R-HSA-2559586	DNA Damage/Telomere Stress Induced Senescence	20	-0.470133	-1.84289	0.00551471	0.0307383	0.0233332
R-HSA-3371497	HSP90 chaperone cycle for steroid hormone receptors (SHR)	20	-0.471976	-1.85011	0.00551471	0.0307383	0.0233332
R-HSA-73856	RNA Polymerase II Transcription Termination	21	-0.455492	-1.81019	0.00552486	0.0307383	0.0233332
R-HSA-5693606	DNA Double Strand Break Response	14	-0.556159	-1.91187	0.00554529	0.0307383	0.0233332
R-HSA-5693607	Processing of DNA double-strand break ends	31	-0.405438	-1.79486	0.00557621	0.0307383	0.0233332
R-HSA-1538133	G0 and Early G1	11	-0.590492	-1.84583	0.00567108	0.031005	0.0235357
R-HSA-1655829	Regulation of cholesterol biosynthesis by SREBP (SREBF)	19	-0.482927	-1.84574	0.00573614	0.0311057	0.0236122
R-HSA-2022090	Assembly of collagen fibrils and other multimeric structures	15	0.557692	1.97999	0.00656455	0.0353109	0.0268043
R-HSA-5368286	Mitochondrial translation initiation	26	-0.40818	-1.71234	0.00728597	0.038878	0.029512
R-HSA-8939236	RUNX1 regulates transcription of genes involved in differentiation of HSCs	28	-0.423098	-1.82092	0.00740741	0.0392122	0.0297658
R-HSA-168643	Nucleotide-binding domain, leucine rich repeat containing receptor (NLR) signaling pathways	19	0.496951	1.93867	0.00835073	0.0438527	0.0332883
R-HSA-177929	Signaling by EGFR	16	0.507422	1.86718	0.00849257	0.0438527	0.0332883
R-HSA-202733	Cell surface interactions at the vascular wall	36	0.376311	1.80623	0.00851064	0.0438527	0.0332883
R-HSA-1500931	Cell-Cell communication	30	0.409491	1.83467	0.00854701	0.0438527	0.0332883
R-HSA-110373	Resolution of AP sites via the multiple-nucleotide patch replacement pathway	15	-0.519916	-1.84358	0.00917431	0.0457476	0.0347267
R-HSA-5651801	PCNA-Dependent Long Patch Base Excision Repair	15	-0.519916	-1.84358	0.00917431	0.0457476	0.0347267
R-HSA-69186	Lagging Strand Synthesis	15	-0.5203	-1.84494	0.00917431	0.0457476	0.0347267
R-HSA-5685942	HDR through Homologous Recombination (HRR)	32	-0.389015	-1.74828	0.00925926	0.0457476	0.0347267
R-HSA-69052	Switching of origins to a post-replicative state	32	-0.392593	-1.76435	0.00925926	0.0457476	0.0347267
R-HSA-5683057	MAPK family signaling cascades	77	0.283066	1.64458	0.0106838	0.0523976	0.0397747
R-HSA-8939211	ESR-mediated signaling	47	-0.342257	-1.69549	0.0127971	0.0621936	0.0472108
R-HSA-195721	Signaling by WNT	62	-0.314872	-1.68389	0.0128676	0.0621936	0.0472108
R-HSA-5684996	MAPK1/MAPK3 signaling	69	0.286682	1.6162	0.0131868	0.0632777	0.0480338
R-HSA-76046	RNA Polymerase III Transcription Initiation	10	-0.575384	-1.7414	0.0133333	0.0635238	0.0482206
R-HSA-9006934	Signaling by Receptor Tyrosine Kinases	145	0.22492	1.51092	0.0135135	0.0639256	0.0485256
R-HSA-68949	Orc1 removal from chromatin	24	-0.41978	-1.72417	0.0143885	0.0675854	0.0513037
R-HSA-5620924	Intraflagellar transport	15	-0.494295	-1.75273	0.0146789	0.0676098	0.0513222
R-HSA-5368287	Mitochondrial translation	27	-0.394549	-1.67607	0.0147601	0.0676098	0.0513222
R-HSA-3000157	Laminin interactions	11	0.58973	1.91302	0.0147992	0.0676098	0.0513222
R-HSA-380994	ATF4 activates genes in response to endoplasmic reticulum stress	11	0.590854	1.91666	0.0147992	0.0676098	0.0513222
R-HSA-446728	Cell junction organization	19	0.462304	1.80351	0.0167015	0.0757815	0.0575253
R-HSA-72187	mRNA 3'-end processing	16	-0.466057	-1.68269	0.0169492	0.0763857	0.0579839
R-HSA-72202	Transport of Mature Transcript to Cytoplasm	18	-0.460044	-1.73691	0.0171756	0.0768866	0.0583642
R-HSA-174411	Polymerase switching on the C-strand of the telomere	10	-0.555161	-1.6802	0.0190476	0.083584	0.0634481
R-HSA-69091	Polymerase switching	10	-0.555161	-1.6802	0.0190476	0.083584	0.0634481
R-HSA-69109	Leading Strand Synthesis	10	-0.555161	-1.6802	0.0190476	0.083584	0.0634481
R-HSA-381042	PERK regulates gene expression	12	0.56123	1.86193	0.0194384	0.0847415	0.0643267
R-HSA-163200	Respiratory electron transport, ATP synthesis by chemiosmotic coupling, and heat production by uncoupling proteins.	27	-0.383727	-1.6301	0.0221402	0.095893	0.0727918
R-HSA-8866654	E3 ubiquitin ligases ubiquitinate target proteins	14	-0.486132	-1.67115	0.025878	0.111359	0.0845319
R-HSA-5673001	RAF/MAP kinase cascade	66	0.270639	1.51764	0.026087	0.111538	0.0846682
R-HSA-211945	Phase I - Functionalization of compounds	23	-0.39558	-1.61867	0.0268817	0.114205	0.086692
R-HSA-9006931	Signaling by Nuclear Receptors	65	-0.288184	-1.56385	0.0275229	0.114736	0.0870956
R-HSA-6790901	rRNA modification in the nucleus and cytosol	15	-0.472518	-1.67551	0.0275229	0.114736	0.0870956
R-HSA-159236	Transport of Mature mRNA derived from an Intron-Containing Transcript	15	-0.467992	-1.65946	0.0275229	0.114736	0.0870956
R-HSA-373080	Class B/2 (Secretin family receptors)	12	0.52239	1.73307	0.0280778	0.116322	0.0882994
R-HSA-9607240	FLT3 Signaling	70	0.267494	1.51023	0.0286976	0.117952	0.0895366
R-HSA-913531	Interferon Signaling	45	0.310018	1.5604	0.0288248	0.117952	0.0895366
R-HSA-380320	Recruitment of NuMA to mitotic centrosomes	32	-0.360033	-1.61803	0.0296296	0.120413	0.0914045
R-HSA-373760	L1CAM interactions	41	0.314042	1.56625	0.0297872	0.120413	0.0914045
R-HSA-194068	Bile acid and bile salt metabolism	10	-0.535053	-1.61934	0.0304762	0.122119	0.0926999
R-HSA-8852276	The role of GTSE1 in G2/M progression after G2 checkpoint	24	-0.392975	-1.61407	0.0305755	0.122119	0.0926999
R-HSA-110314	Recognition of DNA damage by PCNA-containing replication complex	16	-0.436337	-1.57539	0.0320151	0.126833	0.0962782
R-HSA-69183	Processive synthesis on the lagging strand	11	-0.509262	-1.59191	0.0321361	0.126833	0.0962782
R-HSA-72165	mRNA Splicing - Minor Pathway	19	-0.419118	-1.60186	0.0344168	0.134793	0.102321
R-HSA-983695	Antigen activates B Cell Receptor (BCR) leading to generation of second messengers	12	0.502184	1.66604	0.0345572	0.134793	0.102321
R-HSA-6806834	Signaling by MET	22	0.406757	1.64114	0.0352423	0.136666	0.103743
R-HSA-3371556	Cellular response to heat stress	25	-0.37831	-1.56847	0.0383912	0.148017	0.112359
R-HSA-182971	EGFR downregulation	11	0.506812	1.64404	0.0401691	0.152117	0.115471
R-HSA-8874081	MET activates PTK2 signaling	11	0.504335	1.63601	0.0401691	0.152117	0.115471
R-HSA-8875878	MET promotes cell motility	11	0.504335	1.63601	0.0401691	0.152117	0.115471
R-HSA-6799198	Complex I biogenesis	15	-0.444627	-1.57661	0.040367	0.152117	0.115471
R-HSA-2990846	SUMOylation	40	-0.319906	-1.5093	0.042065	0.156669	0.118926
R-HSA-3108232	SUMO E3 ligases SUMOylate target proteins	40	-0.319906	-1.5093	0.042065	0.156669	0.118926
R-HSA-453274	Mitotic G2-G2/M phases	62	-0.282238	-1.50937	0.0422794	0.156669	0.118926
R-HSA-3000178	ECM proteoglycans	17	0.435605	1.6325	0.04375	0.161222	0.122383
R-HSA-174143	APC/C-mediated degradation of cell cycle proteins	27	-0.362338	-1.53923	0.0442804	0.161394	0.122513
R-HSA-453276	Regulation of mitotic cell cycle	27	-0.362338	-1.53923	0.0442804	0.161394	0.122513
R-HSA-8878171	Transcriptional regulation by RUNX1	43	-0.304989	-1.48259	0.0459559	0.16659	0.126458
R-HSA-74158	RNA Polymerase III Transcription	12	-0.476928	-1.54789	0.0482375	0.172981	0.131309
R-HSA-749476	RNA Polymerase III Abortive And Retractive Initiation	12	-0.476928	-1.54789	0.0482375	0.172981	0.131309
R-HSA-157118	Signaling by NOTCH	47	-0.296998	-1.47129	0.0511883	0.182276	0.138365
R-HSA-156580	Phase II - Conjugation of compounds	15	-0.427674	-1.51649	0.0513761	0.182276	0.138365
R-HSA-69275	G2/M Transition	61	-0.276061	-1.46899	0.051756	0.182652	0.13865
R-HSA-380270	Recruitment of mitotic centrosome proteins and complexes	26	-0.366433	-1.53721	0.0546448	0.190444	0.144565
R-HSA-380287	Centrosome maturation	26	-0.366433	-1.53721	0.0546448	0.190444	0.144565
R-HSA-389661	Glyoxylate metabolism and glycine degradation	11	-0.490907	-1.53454	0.0548204	0.190444	0.144565
R-HSA-8854518	AURKA Activation by TPX2	25	-0.364193	-1.50994	0.0585009	0.202177	0.153471
R-HSA-69166	Removal of the Flap Intermediate	10	-0.503125	-1.52271	0.0590476	0.203014	0.154107
R-HSA-389977	Post-chaperonin tubulin folding pathway	12	-0.467663	-1.51782	0.0593692	0.203073	0.154152
R-HSA-1430728	Metabolism	473	-0.162237	-1.24782	0.0609952	0.206909	0.157064
R-HSA-2132295	MHC class II antigen presentation	32	-0.332711	-1.49524	0.0611111	0.206909	0.157064
R-HSA-199418	Negative regulation of the PI3K/AKT network	34	0.323627	1.51258	0.0659574	0.22219	0.168663
R-HSA-199992	trans-Golgi Network Vesicle Budding	15	-0.415006	-1.47158	0.0678899	0.227551	0.172732
R-HSA-6811558	PI5P, PP2A and IER3 Regulate PI3K/AKT Signaling	30	0.334928	1.5006	0.0683761	0.228034	0.173099
R-HSA-68827	CDT1 association with the CDC6:ORC:origin complex	16	-0.3985	-1.43878	0.0696798	0.231226	0.175522
R-HSA-5693579	Homologous DNA Pairing and Strand Exchange	18	-0.393819	-1.48687	0.0706107	0.232076	0.176168
R-HSA-2559582	Senescence-Associated Secretory Phenotype (SASP)	31	-0.332059	-1.47001	0.070632	0.232076	0.176168
R-HSA-1428517	The citric acid (TCA) cycle and respiratory electron transport	35	-0.316313	-1.43949	0.0719697	0.23428	0.17784
R-HSA-5626467	RHO GTPases activate IQGAPs	14	-0.428341	-1.47248	0.0720887	0.23428	0.17784
R-HSA-5693537	Resolution of D-Loop Structures	12	-0.458958	-1.48957	0.0723562	0.23428	0.17784
R-HSA-983189	Kinesins	24	-0.358057	-1.47065	0.073741	0.23761	0.180368
R-HSA-6791312	TP53 Regulates Transcription of Cell Cycle Genes	15	-0.410119	-1.45425	0.0752294	0.24124	0.183124
R-HSA-9609736	Assembly and cell surface presentation of NMDA receptors	13	-0.43033	-1.43421	0.0787992	0.250452	0.190117
R-HSA-176408	Regulation of APC/C activators between G1/S and early anaphase	23	-0.355201	-1.45344	0.078853	0.250452	0.190117
R-HSA-388396	GPCR downstream signalling	120	-0.215367	-1.32828	0.0806452	0.25493	0.193516
R-HSA-418346	Platelet homeostasis	18	0.39136	1.49351	0.08159	0.2567	0.19486
R-HSA-8852135	Protein ubiquitination	22	-0.364736	-1.47547	0.0839416	0.261499	0.198502
R-HSA-3371453	Regulation of HSF1-mediated heat shock response	18	-0.382108	-1.44266	0.0839695	0.261499	0.198502
R-HSA-5696397	Gap-filling DNA repair synthesis and ligation in GG-NER	17	-0.391394	-1.44112	0.0842912	0.261499	0.198502
R-HSA-2408522	Selenoamino acid metabolism	21	0.373602	1.47999	0.087146	0.269104	0.204275
R-HSA-5693616	Presynaptic phase of homologous DNA pairing and strand exchange	17	-0.384679	-1.4164	0.0881226	0.270865	0.205612
R-HSA-4615885	SUMOylation of DNA replication proteins	12	-0.447814	-1.4534	0.0890538	0.272472	0.206832
R-HSA-5696398	Nucleotide Excision Repair	34	-0.31068	-1.40807	0.0902256	0.274797	0.208596
R-HSA-380259	Loss of Nlp from mitotic centrosomes	23	-0.350363	-1.43364	0.0913978	0.275848	0.209394
R-HSA-380284	Loss of proteins required for interphase microtubule organization from the centrosome	23	-0.350363	-1.43364	0.0913978	0.275848	0.209394
R-HSA-416476	G alpha (q) signalling events	41	-0.293139	-1.38969	0.093985	0.277691	0.210793
R-HSA-5339562	Uptake and actions of bacterial toxins	11	-0.46286	-1.44686	0.094518	0.277691	0.210793
R-HSA-2219530	Constitutive Signaling by Aberrant PI3K in Cancer	23	0.354413	1.45441	0.0945946	0.277691	0.210793
R-HSA-69017	CDK-mediated phosphorylation and removal of Cdc6	22	-0.35513	-1.43661	0.0948905	0.277691	0.210793
R-HSA-174178	APC/C:Cdh1 mediated degradation of Cdc20 and other APC/C:Cdh1 targeted proteins in late mitosis/early G1	22	-0.353579	-1.43034	0.0948905	0.277691	0.210793
R-HSA-176814	Activation of APC/C and APC/C:Cdc20 mediated degradation of mitotic proteins	22	-0.353477	-1.42992	0.0948905	0.277691	0.210793
R-HSA-216083	Integrin cell surface interactions	26	0.341783	1.47435	0.0949227	0.277691	0.210793
R-HSA-5685938	HDR through Single Strand Annealing (SSA)	16	-0.384573	-1.3885	0.0960452	0.279747	0.212355
R-HSA-3108214	SUMOylation of DNA damage response and repair proteins	15	-0.391036	-1.38658	0.0972477	0.281832	0.213937
R-HSA-176409	APC/C:Cdc20 mediated degradation of mitotic proteins	21	-0.350139	-1.3915	0.0976059	0.281832	0.213937
R-HSA-6781827	Transcription-Coupled Nucleotide Excision Repair (TC-NER)	31	-0.316005	-1.39894	0.098513	0.282065	0.214114
R-HSA-445989	TAK1 activates NFkB by phosphorylation and activation of IKKs complex	10	0.461223	1.45186	0.0985325	0.282065	0.214114
R-HSA-383280	Nuclear Receptor transcription pathway	13	-0.422137	-1.40691	0.0994371	0.283392	0.215121
R-HSA-451927	Interleukin-2 family signaling	15	0.412662	1.46509	0.100656	0.283392	0.215121
R-HSA-109582	Hemostasis	155	0.185471	1.26729	0.101124	0.283392	0.215121
R-HSA-8978868	Fatty acid metabolism	40	-0.29017	-1.369	0.101338	0.283392	0.215121
R-HSA-379716	Cytosolic tRNA aminoacylation	12	0.440928	1.46281	0.101512	0.283392	0.215121
R-HSA-166016	Toll Like Receptor 4 (TLR4) Cascade	26	0.333852	1.44014	0.101545	0.283392	0.215121
R-HSA-450531	Regulation of mRNA stability by proteins that bind AU-rich elements	22	-0.345729	-1.39858	0.10219	0.284002	0.215585
R-HSA-3371571	HSF1-dependent transactivation	10	-0.472477	-1.42995	0.102857	0.284671	0.216092
R-HSA-499943	Interconversion of nucleotide di- and triphosphates	12	-0.437126	-1.41871	0.105751	0.290383	0.220428
R-HSA-5654736	Signaling by FGFR1	12	0.433035	1.43663	0.105832	0.290383	0.220428
R-HSA-6811434	COPI-dependent Golgi-to-ER retrograde traffic	29	-0.318562	-1.38899	0.106227	0.290383	0.220428
R-HSA-372790	Signaling by GPCR	130	-0.204888	-1.27907	0.107143	0.291691	0.221421
R-HSA-2559583	Cellular Senescence	54	-0.261686	-1.34571	0.108257	0.293526	0.222814
R-HSA-75067	Processing of Capped Intronless Pre-mRNA	11	-0.454247	-1.41994	0.109641	0.296075	0.224749
R-HSA-389960	Formation of tubulin folding intermediates by CCT/TriC	10	-0.464239	-1.40502	0.110476	0.297127	0.225548
R-HSA-73887	Death Receptor Signalling	35	0.294735	1.39743	0.113924	0.30517	0.231653
R-HSA-432722	Golgi Associated Vesicle Biogenesis	14	-0.399354	-1.37283	0.116451	0.309944	0.235277
R-HSA-418555	G alpha (s) signalling events	17	0.37925	1.4213	0.116667	0.309944	0.235277
R-HSA-71291	Metabolism of amino acids and derivatives	86	-0.225742	-1.298	0.1171	0.309944	0.235277
R-HSA-5357956	TNFR1-induced NFkappaB signaling pathway	13	0.406122	1.39856	0.119403	0.31479	0.238955
R-HSA-179419	APC:Cdc20 mediated degradation of cell cycle proteins prior to satisfation of the cell cycle checkpoint	20	-0.346932	-1.35995	0.121324	0.318594	0.241843
R-HSA-195253	Degradation of beta-catenin by the destruction complex	14	-0.395845	-1.36077	0.121996	0.319104	0.24223
R-HSA-8955332	Carboxyterminal post-translational modifications of tubulin	12	-0.423796	-1.37545	0.124304	0.323871	0.245848
R-HSA-1643713	Signaling by EGFR in Cancer	10	0.443134	1.39492	0.125786	0.326457	0.247811
R-HSA-166166	MyD88-independent TLR4 cascade	21	0.342249	1.35579	0.12854	0.329742	0.250305
R-HSA-168164	Toll Like Receptor 3 (TLR3) Cascade	21	0.342249	1.35579	0.12854	0.329742	0.250305
R-HSA-937061	TRIF(TICAM1)-mediated TLR4 signaling	21	0.342249	1.35579	0.12854	0.329742	0.250305
R-HSA-191859	snRNP Assembly	10	-0.454123	-1.37441	0.129524	0.329742	0.250305
R-HSA-194441	Metabolism of non-coding RNA	10	-0.454123	-1.37441	0.129524	0.329742	0.250305
R-HSA-450408	AUF1 (hnRNP D0) binds and destabilizes mRNA	17	-0.3658	-1.34689	0.132184	0.335234	0.254475
R-HSA-418594	G alpha (i) signalling events	55	-0.25199	-1.29965	0.134686	0.340056	0.258135
R-HSA-5693568	Resolution of D-loop Structures through Holliday Junction Intermediates	11	-0.43383	-1.35612	0.137996	0.340056	0.258135
R-HSA-72312	rRNA processing	42	-0.269855	-1.30237	0.138686	0.340056	0.258135
R-HSA-8856688	Golgi-to-ER retrograde transport	33	-0.295313	-1.3319	0.138889	0.340056	0.258135
R-HSA-419037	NCAM1 interactions	10	-0.447373	-1.35397	0.139048	0.340056	0.258135
R-HSA-174184	Cdc20:Phospho-APC/C mediated degradation of Cyclin A	19	-0.344421	-1.31637	0.139579	0.340056	0.258135
R-HSA-381426	Regulation of Insulin-like Growth Factor (IGF) transport and uptake by Insulin-like Growth Factor Binding Proteins (IGFBPs)	32	0.29103	1.31857	0.140693	0.340056	0.258135
R-HSA-6783310	Fanconi Anemia Pathway	13	-0.395737	-1.31892	0.140713	0.340056	0.258135
R-HSA-6811436	COPI-independent Golgi-to-ER retrograde traffic	13	-0.395191	-1.3171	0.140713	0.340056	0.258135
R-HSA-174113	SCF-beta-TrCP mediated degradation of Emi1	13	-0.395737	-1.31892	0.140713	0.340056	0.258135
R-HSA-5610780	Degradation of GLI1 by the proteasome	13	-0.395737	-1.31892	0.140713	0.340056	0.258135
R-HSA-5678895	Defective CFTR causes cystic fibrosis	13	-0.395737	-1.31892	0.140713	0.340056	0.258135
R-HSA-9604323	Negative regulation of NOTCH4 signaling	13	-0.395737	-1.31892	0.140713	0.340056	0.258135
R-HSA-190840	Microtubule-dependent trafficking of connexons from Golgi to the plasma membrane	10	-0.443936	-1.34357	0.142857	0.343992	0.261122
R-HSA-190861	Gap junction assembly	14	-0.386454	-1.32849	0.144177	0.345922	0.262587
R-HSA-512988	Interleukin-3, Interleukin-5 and GM-CSF signaling	17	0.364174	1.3648	0.145833	0.348641	0.264651
R-HSA-1226099	Signaling by FGFR in disease	19	-0.34159	-1.30555	0.147228	0.350717	0.266227
R-HSA-1266695	Interleukin-7 signaling	10	-0.432352	-1.30851	0.158095	0.373842	0.283781
R-HSA-69615	G1/S DNA Damage Checkpoints	18	-0.349157	-1.31825	0.158397	0.373842	0.283781
R-HSA-8853659	RET signaling	14	-0.377168	-1.29657	0.158965	0.373842	0.283781
R-HSA-6791226	Major pathway of rRNA processing in the nucleolus and cytosol	37	-0.2748	-1.28006	0.159259	0.373842	0.283781
R-HSA-170834	Signaling by TGF-beta Receptor Complex	15	0.378452	1.34363	0.159737	0.373842	0.283781
R-HSA-162909	Host Interactions of HIV factors	27	-0.303468	-1.28915	0.164207	0.382957	0.290701
R-HSA-1257604	PIP3 activates AKT signaling	71	0.214639	1.22556	0.165254	0.384058	0.291536
R-HSA-168928	DDX58/IFIH1-mediated induction of interferon-alpha/beta	15	0.372429	1.32225	0.166302	0.38466	0.291993
R-HSA-6782210	Gap-filling DNA repair synthesis and ligation in TC-NER	29	-0.299578	-1.30622	0.166667	0.38466	0.291993
R-HSA-74752	Signaling by Insulin receptor	22	0.322469	1.30107	0.167401	0.385022	0.292268
R-HSA-168254	Influenza Infection	31	-0.289826	-1.28305	0.171004	0.391601	0.297262
R-HSA-166658	Complement cascade	11	-0.422189	-1.31973	0.172023	0.391601	0.297262
R-HSA-977606	Regulation of Complement cascade	11	-0.422189	-1.31973	0.172023	0.391601	0.297262
R-HSA-421270	Cell-cell junction organization	16	0.354092	1.30297	0.174098	0.394977	0.299824
R-HSA-1442490	Collagen degradation	12	0.394455	1.30863	0.174946	0.395556	0.300264
R-HSA-912526	Interleukin receptor SHC signaling	10	0.420435	1.32346	0.176101	0.396821	0.301225
R-HSA-909733	Interferon alpha/beta signaling	12	0.393674	1.30604	0.177106	0.396884	0.301272
R-HSA-73893	DNA Damage Bypass	20	-0.326563	-1.28011	0.178309	0.396884	0.301272
R-HSA-8868773	rRNA processing in the nucleus and cytosol	40	-0.266988	-1.25963	0.179732	0.396884	0.301272
R-HSA-168325	Viral Messenger RNA Synthesis	12	-0.401503	-1.3031	0.179963	0.396884	0.301272
R-HSA-69563	p53-Dependent G1 DNA Damage Response	17	-0.345007	-1.27033	0.180077	0.396884	0.301272
R-HSA-69580	p53-Dependent G1/S DNA damage checkpoint	17	-0.345007	-1.27033	0.180077	0.396884	0.301272
R-HSA-5620920	Cargo trafficking to the periciliary membrane	10	0.415893	1.30917	0.180294	0.396884	0.301272
R-HSA-391251	Protein folding	28	-0.297702	-1.28124	0.181481	0.398185	0.30226
R-HSA-5610787	Hedgehog 'off' state	29	-0.294854	-1.28562	0.18315	0.399246	0.303065
R-HSA-5173105	O-linked glycosylation	11	-0.414258	-1.29494	0.183365	0.399246	0.303065
R-HSA-168898	Toll-like Receptor Cascades	30	0.275033	1.23225	0.183761	0.399246	0.303065
R-HSA-381119	Unfolded Protein Response (UPR)	33	0.278881	1.27294	0.186147	0.400927	0.304341
R-HSA-5689880	Ub-specific processing proteases	50	-0.244953	-1.24307	0.186833	0.400927	0.304341
R-HSA-390466	Chaperonin-mediated protein folding	25	-0.301853	-1.25148	0.1883	0.400927	0.304341
R-HSA-75105	Fatty acyl-CoA biosynthesis	11	-0.411621	-1.28669	0.189036	0.400927	0.304341
R-HSA-450294	MAP kinase activation	17	0.337448	1.26464	0.189583	0.400927	0.304341
R-HSA-69273	Cyclin A/B1/B2 associated events during G2/M transition	12	-0.398234	-1.29248	0.191095	0.400927	0.304341
R-HSA-5362768	Hh mutants that don't undergo autocatalytic processing are degraded by ERAD	12	-0.395628	-1.28403	0.19295	0.400927	0.304341
R-HSA-5387390	Hh mutants abrogate ligand secretion	12	-0.395628	-1.28403	0.19295	0.400927	0.304341
R-HSA-5610783	Degradation of GLI2 by the proteasome	12	-0.395628	-1.28403	0.19295	0.400927	0.304341
R-HSA-5610785	GLI3 is processed to GLI3R by the proteasome	12	-0.395628	-1.28403	0.19295	0.400927	0.304341
R-HSA-69601	Ubiquitin Mediated Degradation of Phosphorylated Cdc25A	12	-0.395628	-1.28403	0.19295	0.400927	0.304341
R-HSA-69610	p53-Independent DNA Damage Response	12	-0.395628	-1.28403	0.19295	0.400927	0.304341
R-HSA-69613	p53-Independent G1/S DNA damage checkpoint	12	-0.395628	-1.28403	0.19295	0.400927	0.304341
R-HSA-8854050	FBXL7 down-regulates AURKA during mitotic entry and in early mitosis	12	-0.395628	-1.28403	0.19295	0.400927	0.304341
R-HSA-162906	HIV Infection	45	-0.254317	-1.25002	0.194192	0.402256	0.30535
R-HSA-75893	TNF signaling	15	0.361772	1.28441	0.196937	0.406677	0.308706
R-HSA-389958	Cooperation of Prefoldin and TriC/CCT in actin and tubulin folding	12	-0.391029	-1.2691	0.198516	0.408673	0.310221
R-HSA-352230	Amino acid transport across the plasma membrane	11	0.394627	1.28013	0.20296	0.416536	0.31619
R-HSA-373752	Netrin-1 signaling	11	0.392279	1.27251	0.207188	0.42391	0.321787
R-HSA-6782135	Dual incision in TC-NER	28	-0.28723	-1.23618	0.209259	0.426363	0.32365
R-HSA-174154	APC/C:Cdc20 mediated degradation of Securin	17	-0.337202	-1.24159	0.210728	0.426363	0.32365
R-HSA-5696395	Formation of Incision Complex in GG-NER	10	0.39432	1.24126	0.21174	0.426363	0.32365
R-HSA-1227986	Signaling by ERBB2	24	0.296528	1.23896	0.213004	0.426363	0.32365
R-HSA-190872	Transport of connexons to the plasma membrane	11	-0.397182	-1.24156	0.213611	0.426363	0.32365
R-HSA-157858	Gap junction trafficking and regulation	18	-0.328307	-1.23954	0.21374	0.426363	0.32365
R-HSA-190828	Gap junction trafficking	18	-0.328307	-1.23954	0.21374	0.426363	0.32365
R-HSA-174084	Autodegradation of Cdh1 by Cdh1:APC/C	17	-0.335662	-1.23592	0.214559	0.426363	0.32365
R-HSA-114508	Effects of PIP2 hydrolysis	12	0.376251	1.24824	0.215983	0.426363	0.32365
R-HSA-5357905	Regulation of TNFR1 signaling	11	0.387873	1.25822	0.217759	0.426363	0.32365
R-HSA-168255	Influenza Life Cycle	29	-0.286609	-1.24967	0.217949	0.426363	0.32365
R-HSA-112314	Neurotransmitter receptors and postsynaptic signal transmission	43	-0.250609	-1.21824	0.21875	0.426363	0.32365
R-HSA-983705	Signaling by the B Cell Receptor (BCR)	29	0.269429	1.19671	0.219298	0.426363	0.32365
R-HSA-75815	Ubiquitin-dependent degradation of Cyclin D	11	-0.39552	-1.23637	0.221172	0.426363	0.32365
R-HSA-169911	Regulation of Apoptosis	11	-0.39552	-1.23637	0.221172	0.426363	0.32365
R-HSA-180534	Vpu mediated degradation of CD4	11	-0.39552	-1.23637	0.221172	0.426363	0.32365
R-HSA-180585	Vif-mediated degradation of APOBEC3G	11	-0.39552	-1.23637	0.221172	0.426363	0.32365
R-HSA-211733	Regulation of activated PAK-2p34 by proteasome mediated degradation	11	-0.39552	-1.23637	0.221172	0.426363	0.32365
R-HSA-349425	Autodegradation of the E3 ubiquitin ligase COP1	11	-0.39552	-1.23637	0.221172	0.426363	0.32365
R-HSA-4641258	Degradation of DVL	11	-0.39552	-1.23637	0.221172	0.426363	0.32365
R-HSA-69231	Cyclin D associated events in G1	18	-0.323566	-1.22163	0.227099	0.434117	0.329536
R-HSA-69236	G1 Phase	18	-0.323566	-1.22163	0.227099	0.434117	0.329536
R-HSA-202424	Downstream TCR signaling	17	-0.331662	-1.22119	0.227969	0.434117	0.329536
R-HSA-194138	Signaling by VEGF	31	0.26233	1.18185	0.228448	0.434117	0.329536
R-HSA-4420097	VEGFA-VEGFR2 Pathway	31	0.26233	1.18185	0.228448	0.434117	0.329536
R-HSA-8951664	Neddylation	48	-0.239254	-1.19696	0.231465	0.438599	0.332938
R-HSA-5696399	Global Genome Nucleotide Excision Repair (GG-NER)	26	-0.291208	-1.22164	0.233151	0.440458	0.334349
R-HSA-9007101	Rab regulation of trafficking	28	0.265755	1.18058	0.233766	0.440458	0.334349
R-HSA-1250196	SHC1 events in ERBB2 signaling	11	0.379134	1.22987	0.234672	0.44092	0.334699
R-HSA-5620912	Anchoring of the basal body to the plasma membrane	36	-0.263211	-1.20405	0.236842	0.443326	0.336526
R-HSA-390471	Association of TriC/CCT with target proteins during biosynthesis	11	-0.385377	-1.20466	0.238185	0.443326	0.336526
R-HSA-597592	Post-translational protein modification	288	-0.154306	-1.11193	0.238255	0.443326	0.336526
R-HSA-193648	NRAGE signals death through JNK	14	0.347099	1.22019	0.238612	0.443326	0.336526
R-HSA-2219528	PI3K/AKT Signaling in Cancer	34	0.258534	1.20835	0.240426	0.445455	0.338142
R-HSA-211897	Cytochrome P450 - arranged by substrate type	12	-0.374081	-1.21409	0.241187	0.445629	0.338274
R-HSA-5621481	C-type lectin receptors (CLRs)	33	0.260814	1.19047	0.242424	0.446677	0.33907
R-HSA-1474228	Degradation of the extracellular matrix	30	0.257903	1.1555	0.245726	0.451514	0.342742
R-HSA-2672351	Stimuli-sensing channels	20	0.308527	1.21085	0.246725	0.452103	0.343189
R-HSA-556833	Metabolism of lipids	160	-0.172807	-1.12604	0.253996	0.463152	0.351576
R-HSA-5689603	UCH proteinases	21	-0.296257	-1.17737	0.254144	0.463152	0.351576
R-HSA-74751	Insulin receptor signalling cascade	15	0.336604	1.19506	0.258206	0.469273	0.356222
R-HSA-389957	Prefoldin mediated transfer of substrate to CCT/TriC	11	-0.374216	-1.16977	0.26087	0.472595	0.358744
R-HSA-187577	SCF(Skp2)-mediated degradation of p27/p21	18	-0.315354	-1.19063	0.26145	0.472595	0.358744
R-HSA-8956319	Nucleobase catabolism	10	0.377717	1.189	0.266247	0.477569	0.36252
R-HSA-110320	Translesion Synthesis by POLH	10	-0.395412	-1.19672	0.266667	0.477569	0.36252
R-HSA-1650814	Collagen biosynthesis and modifying enzymes	16	0.323826	1.1916	0.267516	0.477569	0.36252
R-HSA-1566948	Elastic fibre formation	16	0.324947	1.19572	0.267516	0.477569	0.36252
R-HSA-448424	Interleukin-17 signaling	18	0.30425	1.16108	0.267782	0.477569	0.36252
R-HSA-8957275	Post-translational protein phosphorylation	30	0.252578	1.13164	0.273504	0.486473	0.369279
R-HSA-168138	Toll Like Receptor 9 (TLR9) Cascade	22	0.285805	1.15314	0.277533	0.491894	0.373394
R-HSA-166520	Signaling by NTRKs	24	0.274118	1.14532	0.278027	0.491894	0.373394
R-HSA-168273	Influenza Viral RNA Transcription and Replication	26	-0.27703	-1.16216	0.28051	0.493711	0.374773
R-HSA-5696400	Dual Incision in GG-NER	18	-0.310731	-1.17318	0.280534	0.493711	0.374773
R-HSA-110313	Translesion synthesis by Y family DNA polymerases bypasses lesions on DNA template	19	-0.307314	-1.17455	0.282983	0.496709	0.377049
R-HSA-9609507	Protein localization	42	-0.238259	-1.14988	0.286496	0.501557	0.380729
R-HSA-1169091	Activation of NF-kappaB in B cells	15	-0.325196	-1.15312	0.293578	0.512609	0.389118
R-HSA-69541	Stabilization of p53	13	-0.34463	-1.14859	0.298311	0.51896	0.393939
R-HSA-1989781	PPARA activates gene expression	23	0.274672	1.12718	0.29955	0.51896	0.393939
R-HSA-400206	Regulation of lipid metabolism by Peroxisome proliferator-activated receptor alpha (PPARalpha)	23	0.274672	1.12718	0.29955	0.51896	0.393939
R-HSA-2565942	Regulation of PLK1 Activity at G2/M Transition	30	-0.261545	-1.14958	0.303371	0.522884	0.396919
R-HSA-1433557	Signaling by SCF-KIT	14	0.331019	1.16366	0.303688	0.522884	0.396919
R-HSA-379724	tRNA Aminoacylation	17	0.304631	1.14165	0.304167	0.522884	0.396919
R-HSA-2262752	Cellular responses to stress	128	-0.17517	-1.08968	0.305606	0.523186	0.397148
R-HSA-6804756	Regulation of TP53 Activity through Phosphorylation	31	-0.257342	-1.13924	0.306691	0.523186	0.397148
R-HSA-983231	Factors involved in megakaryocyte development and platelet production	45	-0.229283	-1.12697	0.306715	0.523186	0.397148
R-HSA-2559585	Oncogene Induced Senescence	12	-0.351913	-1.14215	0.307978	0.523186	0.397148
R-HSA-2408557	Selenocysteine synthesis	15	0.320228	1.13691	0.308534	0.523186	0.397148
R-HSA-112315	Transmission across Chemical Synapses	49	-0.223718	-1.1237	0.309091	0.523186	0.397148
R-HSA-3214841	PKMTs methylate histone lysines	12	-0.349849	-1.13545	0.309833	0.523186	0.397148
R-HSA-2980736	Peptide hormone metabolism	13	-0.34133	-1.13759	0.313321	0.52774	0.400604
R-HSA-5633007	Regulation of TP53 Activity	45	-0.226802	-1.11478	0.315789	0.530558	0.402744
R-HSA-187037	Signaling by NTRK1 (TRKA)	17	0.298009	1.11683	0.320833	0.537678	0.408148
R-HSA-109704	PI3K Cascade	11	0.343262	1.1135	0.32981	0.539264	0.409352
R-HSA-168181	Toll Like Receptor 7/8 (TLR7/8) Cascade	21	0.28197	1.117	0.331155	0.539264	0.409352
R-HSA-975138	TRAF6 mediated induction of NFkB and MAP kinases upon TLR7/8 or 9 activation	21	0.28197	1.117	0.331155	0.539264	0.409352
R-HSA-975155	MyD88 dependent cascade initiated on endosome	21	0.28197	1.117	0.331155	0.539264	0.409352
R-HSA-166058	MyD88:MAL(TIRAP) cascade initiated on plasma membrane	21	0.28197	1.117	0.331155	0.539264	0.409352
R-HSA-168179	Toll Like Receptor TLR1:TLR2 Cascade	21	0.28197	1.117	0.331155	0.539264	0.409352
R-HSA-168188	Toll Like Receptor TLR6:TLR2 Cascade	21	0.28197	1.117	0.331155	0.539264	0.409352
R-HSA-181438	Toll Like Receptor 2 (TLR2) Cascade	21	0.28197	1.117	0.331155	0.539264	0.409352
R-HSA-168142	Toll Like Receptor 10 (TLR10) Cascade	21	0.28197	1.117	0.331155	0.539264	0.409352
R-HSA-168176	Toll Like Receptor 5 (TLR5) Cascade	21	0.28197	1.117	0.331155	0.539264	0.409352
R-HSA-975871	MyD88 cascade initiated on plasma membrane	21	0.28197	1.117	0.331155	0.539264	0.409352
R-HSA-72306	tRNA processing	32	-0.247446	-1.11205	0.331481	0.539264	0.409352
R-HSA-6798695	Neutrophil degranulation	109	0.171172	1.0821	0.336343	0.545842	0.414345
R-HSA-429914	Deadenylation-dependent mRNA decay	10	-0.366996	-1.11071	0.339048	0.548495	0.416359
R-HSA-4086398	Ca2+ pathway	10	0.351993	1.10802	0.339623	0.548495	0.416359
R-HSA-5656169	Termination of translesion DNA synthesis	18	-0.295024	-1.11387	0.341603	0.55036	0.417775
R-HSA-9006925	Intracellular signaling by second messengers	81	0.180122	1.06938	0.344754	0.552885	0.419691
R-HSA-6784531	tRNA processing in the nucleus	17	-0.30263	-1.11429	0.344828	0.552885	0.419691
R-HSA-5633008	TP53 Regulates Transcription of Cell Death Genes	10	0.346437	1.09053	0.352201	0.563353	0.427638
R-HSA-1632852	Macroautophagy	26	0.250926	1.08242	0.355408	0.567123	0.4305
R-HSA-5358351	Signaling by Hedgehog	36	-0.234697	-1.07362	0.357143	0.568531	0.431568
R-HSA-9033241	Peroxisomal protein import	16	-0.303477	-1.0957	0.359699	0.571236	0.433622
R-HSA-163125	Post-translational modification: synthesis of GPI-anchored proteins	13	0.315802	1.08753	0.364606	0.577653	0.438493
R-HSA-112399	IRS-mediated signalling	12	0.325905	1.08121	0.37149	0.584465	0.443664
R-HSA-2428928	IRS-related events triggered by IGF1R	12	0.325905	1.08121	0.37149	0.584465	0.443664
R-HSA-2980766	Nuclear Envelope Breakdown	14	-0.314807	-1.08219	0.371534	0.584465	0.443664
R-HSA-9619483	Activation of AMPK downstream of NMDARs	13	-0.324158	-1.08036	0.373358	0.584997	0.444068
R-HSA-9020702	Interleukin-1 signaling	25	0.249447	1.06074	0.373626	0.584997	0.444068
R-HSA-4608870	Asymmetric localization of PCP proteins	16	-0.299248	-1.08043	0.374765	0.585405	0.444378
R-HSA-8953897	Cellular responses to external stimuli	130	-0.167504	-1.04569	0.378571	0.587348	0.445853
R-HSA-186797	Signaling by PDGF	18	0.276553	1.05538	0.378661	0.587348	0.445853
R-HSA-2404192	Signaling by Type 1 Insulin-like Growth Factor 1 Receptor (IGF1R)	13	0.312358	1.07567	0.379531	0.587348	0.445853
R-HSA-2428924	IGF1R signaling cascade	13	0.312358	1.07567	0.379531	0.587348	0.445853
R-HSA-1280218	Adaptive Immune System	162	0.150585	1.03377	0.383562	0.592212	0.449545
R-HSA-193704	p75 NTR receptor-mediated signalling	21	0.263316	1.0431	0.385621	0.594017	0.450914
R-HSA-196849	Metabolism of water-soluble vitamins and cofactors	40	0.211934	1.05526	0.388309	0.596779	0.453011
R-HSA-165159	mTOR signalling	13	0.311014	1.07104	0.390192	0.598294	0.454162
R-HSA-1266738	Developmental Biology	223	-0.149498	-1.03621	0.393103	0.601373	0.456499
R-HSA-6802952	Signaling by BRAF and RAF fusions	13	0.308874	1.06367	0.394456	0.601373	0.456499
R-HSA-8863795	Downregulation of ERBB2 signaling	16	0.28801	1.0598	0.394904	0.601373	0.456499
R-HSA-2142753	Arachidonic acid metabolism	13	-0.321221	-1.07057	0.395872	0.601474	0.456575
R-HSA-388841	Costimulation by the CD28 family	14	0.300988	1.05809	0.399132	0.604283	0.458708
R-HSA-983712	Ion channel transport	33	0.224449	1.02449	0.400433	0.604283	0.458708
R-HSA-5358346	Hedgehog ligand biogenesis	14	-0.306701	-1.05433	0.401109	0.604283	0.458708
R-HSA-5607764	CLEC7A (Dectin-1) signaling	24	0.248869	1.03983	0.401345	0.604283	0.458708
R-HSA-1268020	Mitochondrial protein import	17	-0.288856	-1.06358	0.402299	0.604354	0.458762
R-HSA-397014	Muscle contraction	28	-0.242901	-1.04539	0.405556	0.607878	0.461436
R-HSA-5668541	TNFR2 non-canonical NF-kB pathway	22	0.252433	1.01849	0.4163	0.622583	0.472599
R-HSA-69656	Cyclin A:Cdk2-associated events at S phase entry	28	-0.240224	-1.03387	0.422222	0.627423	0.476273
R-HSA-204998	Cell death signalling via NRAGE, NRIF and NADE	18	0.269461	1.02832	0.422594	0.627423	0.476273
R-HSA-114608	Platelet degranulation	28	-0.239302	-1.02991	0.425926	0.627423	0.476273
R-HSA-167238	Pausing and recovery of Tat-mediated HIV elongation	10	-0.345152	-1.0446	0.426667	0.627423	0.476273
R-HSA-167243	Tat-mediated HIV elongation arrest and recovery	10	-0.345152	-1.0446	0.426667	0.627423	0.476273
R-HSA-167287	HIV elongation arrest and recovery	10	-0.345152	-1.0446	0.426667	0.627423	0.476273
R-HSA-167290	Pausing and recovery of HIV elongation	10	-0.345152	-1.0446	0.426667	0.627423	0.476273
R-HSA-8948216	Collagen chain trimerization	11	0.314881	1.02144	0.427061	0.627423	0.476273
R-HSA-162587	HIV Life Cycle	27	-0.244698	-1.03949	0.428044	0.627485	0.47632
R-HSA-190236	Signaling by FGFR	28	-0.23836	-1.02585	0.42963	0.627682	0.47647
R-HSA-6805567	Keratinization	11	-0.333533	-1.0426	0.431002	0.627682	0.47647
R-HSA-6809371	Formation of the cornified envelope	11	-0.333533	-1.0426	0.431002	0.627682	0.47647
R-HSA-8876198	RAB GEFs exchange GTP for GDP on RABs	22	0.248224	1.00151	0.433921	0.630556	0.478651
R-HSA-376176	Signaling by ROBO receptors	40	-0.218679	-1.03171	0.435946	0.632122	0.47984
R-HSA-1839126	FGFR2 mutant receptor activation	10	-0.338321	-1.02393	0.44	0.635238	0.482206
R-HSA-8851708	Signaling by FGFR2 IIIa TM	10	-0.338321	-1.02393	0.44	0.635238	0.482206
R-HSA-76005	Response to elevated platelet cytosolic Ca2+	29	-0.233649	-1.01876	0.443223	0.63851	0.484689
R-HSA-446219	Synthesis of substrates in N-glycan biosythesis	13	-0.308753	-1.02902	0.444653	0.638563	0.48473
R-HSA-446652	Interleukin-1 family signaling	29	0.225805	1.00295	0.445175	0.638563	0.48473
R-HSA-76002	Platelet activation, signaling and aggregation	57	-0.192451	-1.01137	0.451554	0.646323	0.49062
R-HSA-5632684	Hedgehog 'on' state	17	-0.27778	-1.02279	0.454023	0.647285	0.49135
R-HSA-416482	G alpha (12/13) signalling events	17	0.263842	0.98879	0.454167	0.647285	0.49135
R-HSA-111885	Opioid Signalling	16	-0.280361	-1.01224	0.455744	0.648147	0.492005
R-HSA-1251985	Nuclear signaling by ERBB4	10	0.319501	1.00574	0.457023	0.648584	0.492336
R-HSA-2129379	Molecules associated with elastic fibres	12	-0.310599	-1.00806	0.458256	0.648953	0.492616
R-HSA-8943724	Regulation of PTEN gene transcription	14	0.281601	0.989938	0.472885	0.668251	0.507265
R-HSA-2454202	Fc epsilon receptor (FCERI) signaling	32	0.217859	0.987057	0.482684	0.680656	0.516682
R-HSA-69202	Cyclin E associated events during G1/S transition	27	-0.232854	-0.98918	0.487085	0.684873	0.519883
R-HSA-9013694	Signaling by NOTCH4	19	-0.255925	-0.978142	0.489484	0.684873	0.519883
R-HSA-4641257	Degradation of AXIN	14	-0.286536	-0.985008	0.489834	0.684873	0.519883
R-HSA-1834949	Cytosolic sensors of pathogen-associated DNA	17	-0.26905	-0.990651	0.490421	0.684873	0.519883
R-HSA-6811442	Intra-Golgi and retrograde Golgi-to-ER traffic	43	-0.20059	-0.975092	0.490809	0.684873	0.519883
R-HSA-1236394	Signaling by ERBB4	19	0.248761	0.970449	0.494781	0.688975	0.522997
R-HSA-1236974	ER-Phagosome pathway	14	-0.285789	-0.982438	0.497227	0.690408	0.524085
R-HSA-112316	Neuronal System	71	-0.178812	-0.981073	0.498113	0.690408	0.524085
R-HSA-168638	NOD1/2 Signaling Pathway	14	0.277268	0.974705	0.498915	0.690408	0.524085
R-HSA-1643685	Disease	219	-0.142149	-0.9785	0.5	0.690476	0.524136
R-HSA-3781865	Diseases of glycosylation	21	-0.245817	-0.976911	0.502762	0.692856	0.525943
R-HSA-8856825	Cargo recognition for clathrin-mediated endocytosis	32	0.215609	0.976866	0.504329	0.693582	0.526494
R-HSA-5655253	Signaling by FGFR2 in disease	11	-0.311319	-0.973159	0.508507	0.697301	0.529317
R-HSA-5617833	Cilium Assembly	56	-0.188038	-0.979187	0.509124	0.697301	0.529317
R-HSA-9010553	Regulation of expression of SLITs and ROBOs	30	-0.21709	-0.95419	0.511236	0.698759	0.530424
R-HSA-1234176	Oxygen-dependent proline hydroxylation of Hypoxia-inducible Factor Alpha	12	-0.293946	-0.954015	0.517625	0.706045	0.535955
R-HSA-6807878	COPI-mediated anterograde transport	24	-0.233502	-0.95907	0.519784	0.706281	0.536134
R-HSA-8854214	TBC/RABGAPs	10	0.305095	0.960391	0.519916	0.706281	0.536134
R-HSA-8848021	Signaling by PTK6	19	0.24148	0.942044	0.524008	0.708952	0.538162
R-HSA-9006927	Signaling by Non-Receptor Tyrosine Kinases	19	0.24148	0.942044	0.524008	0.708952	0.538162
R-HSA-927802	Nonsense-Mediated Decay (NMD)	19	-0.250152	-0.956078	0.527725	0.710649	0.539449
R-HSA-975957	Nonsense Mediated Decay (NMD) enhanced by the Exon Junction Complex (EJC)	19	-0.250152	-0.956078	0.527725	0.710649	0.539449
R-HSA-5654738	Signaling by FGFR2	20	-0.239772	-0.939892	0.529412	0.710649	0.539449
R-HSA-3928662	EPHB-mediated forward signaling	10	-0.311766	-0.943561	0.529524	0.710649	0.539449
R-HSA-5619084	ABC transporter disorders	17	-0.259125	-0.954106	0.534483	0.715134	0.542854
R-HSA-156827	L13a-mediated translational silencing of Ceruloplasmin expression	16	0.253346	0.932247	0.537155	0.715134	0.542854
R-HSA-72613	Eukaryotic Translation Initiation	16	0.253346	0.932247	0.537155	0.715134	0.542854
R-HSA-72737	Cap-dependent Translation Initiation	16	0.253346	0.932247	0.537155	0.715134	0.542854
R-HSA-438064	Post NMDA receptor activation events	26	-0.220665	-0.925707	0.542805	0.721108	0.547389
R-HSA-917977	Transferrin endocytosis and recycling	11	-0.302598	-0.945897	0.544423	0.721108	0.547389
R-HSA-2871837	FCERI mediated NF-kB activation	19	0.237407	0.926157	0.544885	0.721108	0.547389
R-HSA-446193	Biosynthesis of the N-glycan precursor (dolichol lipid-linked oligosaccharide, LLO) and transfer to a nascent protein	17	-0.255912	-0.942278	0.545977	0.721122	0.5474
R-HSA-70326	Glucose metabolism	22	-0.232027	-0.93862	0.547445	0.721632	0.547787
R-HSA-5663205	Infectious disease	78	-0.170755	-0.955667	0.550864	0.724706	0.55012
R-HSA-400253	Circadian Clock	13	0.266246	0.916867	0.560768	0.736283	0.558908
R-HSA-72689	Formation of a pool of free 40S subunits	13	0.265547	0.914462	0.5629	0.737631	0.559931
R-HSA-192823	Viral mRNA Translation	13	0.263543	0.907559	0.567164	0.741762	0.563067
R-HSA-9009391	Extra-nuclear estrogen signaling	18	0.236377	0.902063	0.575314	0.747196	0.567192
R-HSA-156842	Eukaryotic Translation Elongation	13	0.260799	0.898111	0.575693	0.747196	0.567192
R-HSA-156902	Peptide chain elongation	13	0.260799	0.898111	0.575693	0.747196	0.567192
R-HSA-9612973	Autophagy	29	0.206352	0.916547	0.576754	0.747196	0.567192
R-HSA-8948751	Regulation of PTEN stability and activity	19	0.232138	0.9056	0.578288	0.747196	0.567192
R-HSA-179409	APC-Cdc20 mediated degradation of Nek2A	10	-0.297846	-0.901432	0.580952	0.747196	0.567192
R-HSA-5655862	Translesion synthesis by POLK	10	-0.29872	-0.904076	0.580952	0.747196	0.567192
R-HSA-163841	Gamma carboxylation, hypusine formation and arylsulfatase activation	10	-0.298519	-0.903469	0.580952	0.747196	0.567192
R-HSA-112040	G-protein mediated events	12	-0.280055	-0.908929	0.584416	0.747196	0.567192
R-HSA-112043	PLC beta mediated events	12	-0.280055	-0.908929	0.584416	0.747196	0.567192
R-HSA-6806667	Metabolism of fat-soluble vitamins	10	-0.29573	-0.895027	0.584762	0.747196	0.567192
R-HSA-975634	Retinoid metabolism and transport	10	-0.29573	-0.895027	0.584762	0.747196	0.567192
R-HSA-8941858	Regulation of RUNX3 expression and activity	13	-0.275019	-0.916586	0.587242	0.7478	0.567651
R-HSA-5576891	Cardiac conduction	21	-0.226579	-0.900459	0.587477	0.7478	0.567651
R-HSA-5578775	Ion homeostasis	13	0.255636	0.880331	0.590618	0.749183	0.5687
R-HSA-6802957	Oncogenic MAPK signaling	15	0.249446	0.885616	0.59081	0.749183	0.5687
R-HSA-381340	Transcriptional regulation of white adipocyte differentiation	15	-0.25937	-0.919704	0.59633	0.753205	0.571754
R-HSA-442755	Activation of NMDA receptors and postsynaptic events	27	-0.211238	-0.897353	0.597786	0.753205	0.571754
R-HSA-113418	Formation of the Early Elongation Complex	13	-0.271704	-0.90554	0.598499	0.753205	0.571754
R-HSA-167158	Formation of the HIV-1 Early Elongation Complex	13	-0.271704	-0.90554	0.598499	0.753205	0.571754
R-HSA-425393	Transport of inorganic cations/anions and amino acids/oligopeptides	27	0.203093	0.892182	0.602174	0.755403	0.573422
R-HSA-1168372	Downstream signaling events of B Cell Receptor (BCR)	18	0.232074	0.885644	0.60251	0.755403	0.573422
R-HSA-1445148	Translocation of SLC2A4 (GLUT4) to the plasma membrane	20	-0.22383	-0.877399	0.604779	0.756522	0.574271
R-HSA-9006936	Signaling by TGF-beta family members	22	0.219296	0.884795	0.605727	0.756522	0.574271
R-HSA-8866652	Synthesis of active ubiquitin: roles of E1 and E2 enzymes	11	-0.285714	-0.89312	0.606805	0.756522	0.574271
R-HSA-375165	NCAM signaling for neurite out-growth	15	-0.256368	-0.90906	0.611009	0.760342	0.577171
R-HSA-9639288	Amino acids regulate mTORC1	18	0.226128	0.86295	0.612971	0.760712	0.577452
R-HSA-174824	Plasma lipoprotein assembly, remodeling, and clearance	16	0.233712	0.86	0.613588	0.760712	0.577452
R-HSA-5668914	Diseases of metabolism	20	-0.221002	-0.866315	0.615809	0.761698	0.5782
R-HSA-2029480	Fcgamma receptor (FCGR) dependent phagocytosis	17	0.230663	0.864447	0.616667	0.761698	0.5782
R-HSA-351202	Metabolism of polyamines	16	0.231947	0.853507	0.626327	0.7722	0.586172
R-HSA-5658442	Regulation of RAS by GAPs	16	-0.245897	-0.887808	0.629002	0.772641	0.586508
R-HSA-5619102	SLC transporter disorders	16	-0.245523	-0.886456	0.629002	0.772641	0.586508
R-HSA-163685	Integration of energy metabolism	23	-0.213149	-0.872182	0.632616	0.775653	0.588794
R-HSA-4086400	PCP/CE pathway	23	-0.212194	-0.868272	0.641577	0.784259	0.595326
R-HSA-162599	Late Phase of HIV Life Cycle	24	-0.212828	-0.874152	0.642086	0.784259	0.595326
R-HSA-5656121	Translesion synthesis by POLI	10	-0.281283	-0.851303	0.64381	0.784259	0.595326
R-HSA-437239	Recycling pathway of L1	19	0.214767	0.837833	0.645094	0.784259	0.595326
R-HSA-72706	GTP hydrolysis and joining of the 60S ribosomal subunit	15	0.23517	0.834931	0.645514	0.784259	0.595326
R-HSA-5362517	Signaling by Retinoic Acid	10	-0.280463	-0.84882	0.647619	0.785385	0.596181
R-HSA-6782315	tRNA modification in the nucleus and cytosol	14	-0.251272	-0.863781	0.648799	0.785388	0.596183
R-HSA-3928665	EPH-ephrin mediated repulsion of cells	16	-0.24167	-0.872547	0.651601	0.787351	0.597673
R-HSA-5688426	Deubiquitination	61	-0.168029	-0.894123	0.654344	0.789236	0.599104
R-HSA-425366	Transport of bile salts and organic acids, metal ions and amine compounds	15	0.229624	0.81524	0.660832	0.795622	0.603952
R-HSA-422356	Regulation of insulin secretion	12	-0.265027	-0.860157	0.666048	0.796691	0.604763
R-HSA-70171	Glycolysis	16	-0.235266	-0.849426	0.672316	0.796691	0.604763
R-HSA-167160	RNA Pol II CTD phosphorylation and interaction with CE during HIV infection	11	-0.266998	-0.834614	0.674858	0.796691	0.604763
R-HSA-167161	HIV Transcription Initiation	11	-0.266998	-0.834614	0.674858	0.796691	0.604763
R-HSA-167162	RNA Polymerase II HIV Promoter Escape	11	-0.266998	-0.834614	0.674858	0.796691	0.604763
R-HSA-72086	mRNA Capping	11	-0.266998	-0.834614	0.674858	0.796691	0.604763
R-HSA-73776	RNA Polymerase II Promoter Escape	11	-0.266998	-0.834614	0.674858	0.796691	0.604763
R-HSA-73779	RNA Polymerase II Transcription Pre-Initiation And Promoter Opening	11	-0.266998	-0.834614	0.674858	0.796691	0.604763
R-HSA-75953	RNA Polymerase II Transcription Initiation	11	-0.266998	-0.834614	0.674858	0.796691	0.604763
R-HSA-76042	RNA Polymerase II Transcription Initiation And Promoter Clearance	11	-0.266998	-0.834614	0.674858	0.796691	0.604763
R-HSA-77075	RNA Pol II CTD phosphorylation and interaction with CE	11	-0.266998	-0.834614	0.674858	0.796691	0.604763
R-HSA-1236975	Antigen processing-Cross presentation	17	0.215321	0.806951	0.68125	0.802816	0.609413
R-HSA-1660499	Synthesis of PIPs at the plasma membrane	10	-0.270344	-0.818197	0.68381	0.804411	0.610624
R-HSA-8939902	Regulation of RUNX2 expression and activity	15	-0.235007	-0.833313	0.691743	0.81054	0.615276
R-HSA-425407	SLC-mediated transmembrane transport	57	-0.164355	-0.863716	0.694698	0.81054	0.615276
R-HSA-1234174	Cellular response to hypoxia	13	0.231757	0.7981	0.695096	0.81054	0.615276
R-HSA-5607761	Dectin-1 mediated noncanonical NF-kB signaling	13	0.231757	0.7981	0.695096	0.81054	0.615276
R-HSA-5676590	NIK-->noncanonical NF-kB signaling	13	0.231757	0.7981	0.695096	0.81054	0.615276
R-HSA-6803529	FGFR2 alternative splicing	11	-0.259805	-0.812129	0.701323	0.816375	0.619705
R-HSA-1592230	Mitochondrial biogenesis	10	0.249044	0.783952	0.704403	0.81853	0.621342
R-HSA-350562	Regulation of ornithine decarboxylase (ODC)	12	-0.251235	-0.815394	0.710575	0.823903	0.62542
R-HSA-1799339	SRP-dependent cotranslational protein targeting to membrane	14	0.223294	0.784964	0.711497	0.823903	0.62542
R-HSA-917937	Iron uptake and transport	20	-0.203052	-0.79595	0.71875	0.83086	0.630701
R-HSA-6781823	Formation of TC-NER Pre-Incision Complex	16	-0.223924	-0.808474	0.721281	0.831045	0.630842
R-HSA-1852241	Organelle biogenesis and maintenance	66	-0.15258	-0.830208	0.721402	0.831045	0.630842
R-HSA-8950505	Gene and protein expression by JAK-STAT signaling after Interleukin-12 stimulation	13	-0.241239	-0.804006	0.724203	0.832833	0.632199
R-HSA-975956	Nonsense Mediated Decay (NMD) independent of the Exon Junction Complex (EJC)	15	-0.228432	-0.810001	0.72844	0.836265	0.634804
R-HSA-389356	CD28 co-stimulation	11	0.239133	0.77572	0.731501	0.838335	0.636375
R-HSA-72766	Translation	65	0.150037	0.837016	0.741794	0.848674	0.644223
R-HSA-8864260	Transcriptional regulation by the AP-2 (TFAP2) family of transcription factors	11	0.233687	0.758055	0.7463	0.851029	0.646011
R-HSA-2173782	Binding and Uptake of Ligands by Scavenger Receptors	12	0.225798	0.749102	0.7473	0.851029	0.646011
R-HSA-6804757	Regulation of TP53 Degradation	12	-0.240277	-0.77983	0.747681	0.851029	0.646011
R-HSA-3858494	Beta-catenin independent WNT signaling	30	0.176089	0.788942	0.752137	0.853882	0.648177
R-HSA-15869	Metabolism of nucleotides	29	-0.176994	-0.771729	0.752747	0.853882	0.648177
R-HSA-6794361	Neurexins and neuroligins	14	-0.224179	-0.770647	0.768946	0.869134	0.659754
R-HSA-532668	N-glycan trimming in the ER and Calnexin/Calreticulin cycle	10	-0.247952	-0.750427	0.769524	0.869134	0.659754
R-HSA-2187338	Visual phototransduction	18	-0.201311	-0.760056	0.772901	0.869134	0.659754
R-HSA-112382	Formation of RNA Pol II elongation complex	16	-0.212957	-0.768878	0.774011	0.869134	0.659754
R-HSA-674695	RNA Polymerase II Pre-transcription Events	16	-0.212957	-0.768878	0.774011	0.869134	0.659754
R-HSA-75955	RNA Polymerase II Transcription Elongation	16	-0.212957	-0.768878	0.774011	0.869134	0.659754
R-HSA-6807070	PTEN Regulation	33	0.169483	0.773597	0.779221	0.872404	0.662237
R-HSA-2682334	EPH-Ephrin signaling	24	-0.182844	-0.750999	0.780576	0.872404	0.662237
R-HSA-3700989	Transcriptional Regulation by TP53	97	-0.138327	-0.813701	0.780847	0.872404	0.662237
R-HSA-72764	Eukaryotic Translation Termination	14	-0.22	-0.756281	0.783734	0.874165	0.663573
R-HSA-73762	RNA Polymerase I Transcription Initiation	16	-0.206669	-0.746177	0.79661	0.887043	0.673349
R-HSA-109606	Intrinsic Pathway for Apoptosis	10	0.222716	0.701076	0.798742	0.887935	0.674026
R-HSA-196854	Metabolism of vitamins and cofactors	57	0.142856	0.768537	0.813187	0.902489	0.685074
R-HSA-382556	ABC-family proteins mediated transport	23	-0.174769	-0.715135	0.815412	0.902913	0.685396
R-HSA-381070	IRE1alpha activates chaperones	19	0.179578	0.700559	0.820459	0.902913	0.685396
R-HSA-6806003	Regulation of TP53 Expression and Degradation	13	-0.210167	-0.700447	0.82364	0.902913	0.685396
R-HSA-167152	Formation of HIV elongation complex in the absence of HIV Tat	14	-0.203521	-0.69963	0.824399	0.902913	0.685396
R-HSA-167169	HIV Transcription Elongation	14	-0.203521	-0.69963	0.824399	0.902913	0.685396
R-HSA-167172	Transcription of the HIV genome	14	-0.203521	-0.69963	0.824399	0.902913	0.685396
R-HSA-167200	Formation of HIV-1 elongation complex containing HIV-1 Tat	14	-0.203521	-0.69963	0.824399	0.902913	0.685396
R-HSA-167246	Tat-mediated elongation of the HIV-1 transcript	14	-0.203521	-0.69963	0.824399	0.902913	0.685396
R-HSA-9020591	Interleukin-12 signaling	15	-0.202222	-0.71706	0.827523	0.904849	0.686865
R-HSA-73863	RNA Polymerase I Transcription Termination	12	-0.210441	-0.682995	0.834879	0.911007	0.69154
R-HSA-204005	COPII-mediated vesicle transport	15	0.192212	0.682415	0.835886	0.911007	0.69154
R-HSA-381038	XBP1(S) activates chaperone genes	18	0.179529	0.685121	0.838912	0.912813	0.692911
R-HSA-5218920	VEGFR2 mediated vascular permeability	11	-0.214702	-0.671142	0.8431	0.915876	0.695236
R-HSA-8856828	Clathrin-mediated endocytosis	41	0.142222	0.709317	0.846809	0.918409	0.697159
R-HSA-5619115	Disorders of transmembrane transporters	33	-0.159226	-0.71813	0.85	0.920373	0.69865
R-HSA-3299685	Detoxification of Reactive Oxygen Species	10	-0.223017	-0.674961	0.855238	0.924544	0.701816
R-HSA-1169410	Antiviral mechanism by IFN-stimulated genes	18	-0.177614	-0.670586	0.860687	0.928929	0.705145
R-HSA-202403	TCR signaling	19	-0.176698	-0.675338	0.862333	0.929202	0.705352
R-HSA-5674400	Constitutive Signaling by AKT1 E17K in Cancer	11	-0.20567	-0.642908	0.863894	0.929383	0.705489
R-HSA-1169408	ISG15 antiviral mechanism	17	-0.177565	-0.6538	0.869732	0.934156	0.709113
R-HSA-9012852	Signaling by NOTCH3	14	-0.190037	-0.653279	0.881701	0.943944	0.716542
R-HSA-75153	Apoptotic execution phase	10	0.194678	0.612815	0.8826	0.943944	0.716542
R-HSA-1483257	Phospholipid metabolism	40	0.132587	0.660175	0.88309	0.943944	0.716542
R-HSA-1483206	Glycerophospholipid biosynthesis	21	0.166042	0.657764	0.88671	0.945754	0.717916
R-HSA-5205647	Mitophagy	10	-0.211087	-0.638855	0.887619	0.945754	0.717916
R-HSA-1980143	Signaling by NOTCH1	13	-0.18065	-0.602075	0.898687	0.956019	0.725709
R-HSA-447115	Interleukin-12 family signaling	17	-0.166406	-0.612713	0.904215	0.960368	0.72901
R-HSA-1793185	Chondroitin sulfate/dermatan sulfate metabolism	14	0.169081	0.594384	0.908894	0.963803	0.731617
R-HSA-194840	Rho GTPase cycle	31	0.140369	0.632389	0.913793	0.96746	0.734393
R-HSA-428157	Sphingolipid metabolism	17	0.15814	0.592655	0.922917	0.974252	0.739549
R-HSA-8878166	Transcriptional regulation by RUNX2	28	-0.140404	-0.604268	0.924074	0.974252	0.739549
R-HSA-392499	Metabolism of proteins	418	-0.104937	-0.795065	0.92459	0.974252	0.739549
R-HSA-5357801	Programmed Cell Death	39	0.124758	0.611087	0.927039	0.975291	0.740338
R-HSA-5663202	Diseases of signal transduction	95	-0.118328	-0.695573	0.935543	0.980022	0.743929
R-HSA-6807505	RNA polymerase II transcribes snRNA genes	19	-0.150688	-0.575927	0.936902	0.980022	0.743929
R-HSA-1489509	DAG and IP3 signaling	10	-0.189514	-0.573564	0.937143	0.980022	0.743929
R-HSA-2644602	Signaling by NOTCH1 PEST Domain Mutants in Cancer	11	-0.180552	-0.56439	0.943289	0.980022	0.743929
R-HSA-2644603	Signaling by NOTCH1 in Cancer	11	-0.180552	-0.56439	0.943289	0.980022	0.743929
R-HSA-2644606	Constitutive Signaling by NOTCH1 PEST Domain Mutants	11	-0.180552	-0.56439	0.943289	0.980022	0.743929
R-HSA-2894858	Signaling by NOTCH1 HD+PEST Domain Mutants in Cancer	11	-0.180552	-0.56439	0.943289	0.980022	0.743929
R-HSA-2894862	Constitutive Signaling by NOTCH1 HD+PEST Domain Mutants	11	-0.180552	-0.56439	0.943289	0.980022	0.743929
R-HSA-6794362	Protein-protein interactions at synapses	21	-0.143128	-0.568812	0.952118	0.986846	0.749109
R-HSA-2122948	Activated NOTCH1 Transmits Signal to the Nucleus	10	-0.180502	-0.546291	0.954286	0.986846	0.749109
R-HSA-8878159	Transcriptional regulation by RUNX3	25	-0.135624	-0.562298	0.954296	0.986846	0.749109
R-HSA-983168	Antigen processing: Ubiquitination & Proteasome degradation	69	-0.106868	-0.589157	0.956124	0.986894	0.749145
R-HSA-199977	ER to Golgi Anterograde Transport	36	0.117158	0.56234	0.957447	0.986894	0.749145
R-HSA-382551	Transport of small molecules	150	-0.103541	-0.667903	0.958781	0.986894	0.749145
R-HSA-5628897	TP53 Regulates Metabolic Genes	21	0.134432	0.532544	0.960784	0.987432	0.749554
R-HSA-8873719	RAB geranylgeranylation	15	0.14826	0.526371	0.962801	0.987917	0.749922
R-HSA-6796648	TP53 Regulates Transcription of DNA Repair Genes	16	-0.142631	-0.514966	0.964218	0.987917	0.749922
R-HSA-71387	Metabolism of carbohydrates	65	-0.0998333	-0.54175	0.970642	0.991452	0.752606
R-HSA-446203	Asparagine N-linked glycosylation	67	-0.10184	-0.556329	0.970642	0.991452	0.752606
R-HSA-1483255	PI Metabolism	19	-0.126745	-0.484418	0.977055	0.995308	0.755532
R-HSA-373755	Semaphorin interactions	16	-0.136293	-0.492083	0.977401	0.995308	0.755532
R-HSA-212436	Generic Transcription Pathway	266	-0.0928969	-0.663793	0.983498	0.998451	0.757918
R-HSA-5687128	MAPK6/MAPK4 signaling	19	-0.122218	-0.467117	0.984704	0.998451	0.757918
R-HSA-948021	Transport to the Golgi and subsequent modification	39	0.10497	0.514162	0.984979	0.998451	0.757918
R-HSA-422475	Axon guidance	143	0.0949341	0.63651	0.986577	0.998554	0.757996
R-HSA-109581	Apoptosis	38	0.0933949	0.455903	0.989247	0.999739	0.758896
R-HSA-186712	Regulation of beta-cell development	10	-0.149099	-0.451248	0.994286	0.999815	0.758954
R-HSA-1630316	Glycosaminoglycan metabolism	23	-0.0952908	-0.389919	0.996416	0.999815	0.758954
R-HSA-5653656	Vesicle-mediated transport	153	0.0854053	0.579931	0.997738	0.999815	0.758954
R-HSA-983169	Class I MHC mediated antigen processing & presentation	77	0.072879	0.423418	0.997863	0.999815	0.758954
R-HSA-73857	RNA Polymerase II Transcription	300	-0.0802895	-0.581904	0.998316	0.999815	0.758954
R-HSA-74160	Gene expression (Transcription)	328	-0.077353	-0.565567	0.998316	0.999815	0.758954
R-HSA-199991	Membrane Trafficking	142	0.0811022	0.542426	1	1	0.759094

## Sheet: GO
ontology	node_id	node_name	raw_p_overrep	FWER_overrep
cellular_component	GO:0005737	cytoplasm	6.51745e-59	0
cellular_component	GO:0005622	intracellular	7.11577e-59	0
cellular_component	GO:0043226	organelle	1.63099e-48	0
cellular_component	GO:0043227	membrane-bounded organelle	5.23982e-48	0
cellular_component	GO:0043229	intracellular organelle	1.28579e-46	0
cellular_component	GO:0043231	intracellular membrane-bounded organelle	6.07077e-39	0
cellular_component	GO:0005829	cytosol	3.30869e-37	0
molecular_function	GO:0005515	protein binding	4.71259e-32	0
biological_process	GO:0007049	cell cycle	3.19895e-29	0
cellular_component	GO:0005654	nucleoplasm	9.90323e-27	0
biological_process	GO:0022402	cell cycle process	4.28676e-23	0
cellular_component	GO:0031974	membrane-enclosed lumen	5.50869e-23	0
cellular_component	GO:0043233	organelle lumen	5.50869e-23	0
cellular_component	GO:0070013	intracellular organelle lumen	5.50869e-23	0
biological_process	GO:0044237	cellular metabolic process	6.56328e-23	0
biological_process	GO:0033554	cellular response to stress	1.61969e-22	0
biological_process	GO:0000278	mitotic cell cycle	2.37228e-22	0
biological_process	GO:0071840	cellular component organization or biogenesis	1.2877e-21	0
biological_process	GO:1901576	organic substance biosynthetic process	4.34575e-21	0
biological_process	GO:0009058	biosynthetic process	5.49912e-21	0
cellular_component	GO:0005634	nucleus	1.23555e-20	0
biological_process	GO:0044260	cellular macromolecule metabolic process	2.26162e-20	0
biological_process	GO:1903047	mitotic cell cycle process	1.16465e-19	0
biological_process	GO:0016043	cellular component organization	1.27412e-19	0
biological_process	GO:0044249	cellular biosynthetic process	1.76664e-18	0
biological_process	GO:0006260	DNA replication	2.19057e-18	0
biological_process	GO:0051128	regulation of cellular component organization	2.71596e-17	0
biological_process	GO:0044238	primary metabolic process	4.93859e-17	0
cellular_component	GO:0031981	nuclear lumen	2.87697e-16	0
biological_process	GO:0006950	response to stress	3.28117e-16	0
molecular_function	GO:0005488	binding	6.99142e-16	0
biological_process	GO:0051726	regulation of cell cycle	7.25148e-16	0
biological_process	GO:0006807	nitrogen compound metabolic process	1.31844e-15	0
cellular_component	GO:0031090	organelle membrane	1.4626e-15	0
biological_process	GO:0006996	organelle organization	2.126e-15	0
biological_process	GO:1901362	organic cyclic compound biosynthetic process	1.37928e-14	0
molecular_function	GO:0003824	catalytic activity	1.63473e-14	0
biological_process	GO:0009059	macromolecule biosynthetic process	2.26249e-14	0
biological_process	GO:0048522	positive regulation of cellular process	2.72911e-14	0
biological_process	GO:0006261	DNA-dependent DNA replication	3.35613e-14	0
biological_process	GO:0010033	response to organic substance	3.45051e-14	0
biological_process	GO:0048518	positive regulation of biological process	5.54035e-14	0
biological_process	GO:0010646	regulation of cell communication	9.79263e-14	0
biological_process	GO:0048523	negative regulation of cellular process	1.25253e-13	0
biological_process	GO:0044786	cell cycle DNA replication	1.35102e-13	0
biological_process	GO:0033260	nuclear DNA replication	1.59885e-13	0
biological_process	GO:0018130	heterocycle biosynthetic process	2.1583e-13	0
biological_process	GO:0031323	regulation of cellular metabolic process	2.27286e-13	0
biological_process	GO:0023051	regulation of signaling	2.68986e-13	0
biological_process	GO:0019438	aromatic compound biosynthetic process	2.85975e-13	0
biological_process	GO:0006974	cellular response to DNA damage stimulus	3.19172e-13	0
biological_process	GO:0065008	regulation of biological quality	3.24158e-13	0
cellular_component	GO:0012505	endomembrane system	3.48289e-13	0
biological_process	GO:0006793	phosphorus metabolic process	4.08096e-13	0
biological_process	GO:0034645	cellular macromolecule biosynthetic process	4.52866e-13	0
biological_process	GO:0080090	regulation of primary metabolic process	5.30591e-13	0
biological_process	GO:0044271	cellular nitrogen compound biosynthetic process	5.64946e-13	0
biological_process	GO:0044770	cell cycle phase transition	5.66837e-13	0
biological_process	GO:0008152	metabolic process	5.88673e-13	0
cellular_component	GO:0110165	cellular anatomical entity	6.31185e-13	0
biological_process	GO:0006796	phosphate-containing compound metabolic process	7.88706e-13	0
biological_process	GO:0043412	macromolecule modification	8.29244e-13	0
biological_process	GO:0051301	cell division	8.45639e-13	0
biological_process	GO:0034654	nucleobase-containing compound biosynthetic process	1.64476e-12	0
biological_process	GO:0070887	cellular response to chemical stimulus	1.64531e-12	0
cellular_component	GO:0005739	mitochondrion	1.67589e-12	0
biological_process	GO:0071310	cellular response to organic substance	2.66865e-12	0
biological_process	GO:1901360	organic cyclic compound metabolic process	4.18375e-12	0
biological_process	GO:0009966	regulation of signal transduction	5.14527e-12	0
biological_process	GO:0051171	regulation of nitrogen compound metabolic process	5.99851e-12	0
biological_process	GO:0006464	cellular protein modification process	6.37864e-12	0
biological_process	GO:0036211	protein modification process	6.37864e-12	0
molecular_function	GO:0000166	nucleotide binding	7.69307e-12	0
biological_process	GO:0035556	intracellular signal transduction	8.25619e-12	0
molecular_function	GO:1901265	nucleoside phosphate binding	8.33265e-12	0
biological_process	GO:1901564	organonitrogen compound metabolic process	8.81483e-12	0
biological_process	GO:0006271	DNA strand elongation involved in DNA replication	9.3878e-12	0
biological_process	GO:0044772	mitotic cell cycle phase transition	1.10788e-11	0
biological_process	GO:0016310	phosphorylation	1.60431e-11	0
biological_process	GO:0065009	regulation of molecular function	1.7725e-11	0
biological_process	GO:0010564	regulation of cell cycle process	3.66898e-11	0
cellular_component	GO:0015630	microtubule cytoskeleton	3.88271e-11	0
biological_process	GO:0044281	small molecule metabolic process	3.89105e-11	0
biological_process	GO:0050790	regulation of catalytic activity	4.207e-11	0
biological_process	GO:0006259	DNA metabolic process	5.48958e-11	0
biological_process	GO:0034641	cellular nitrogen compound metabolic process	5.64434e-11	0
molecular_function	GO:0036094	small molecule binding	6.68568e-11	0
biological_process	GO:0009893	positive regulation of metabolic process	1.08368e-10	0
biological_process	GO:1902531	regulation of intracellular signal transduction	1.70471e-10	0
biological_process	GO:0010604	positive regulation of macromolecule metabolic process	1.98673e-10	0
biological_process	GO:0051179	localization	2.04274e-10	0
biological_process	GO:0009719	response to endogenous stimulus	2.20775e-10	0
biological_process	GO:0042592	homeostatic process	2.70327e-10	0
biological_process	GO:0046483	heterocycle metabolic process	3.23456e-10	0
cellular_component	GO:0005856	cytoskeleton	3.61156e-10	0
biological_process	GO:0033043	regulation of organelle organization	3.64097e-10	0
biological_process	GO:0006468	protein phosphorylation	4.07419e-10	0
biological_process	GO:0006725	cellular aromatic compound metabolic process	4.52837e-10	0
biological_process	GO:0031324	negative regulation of cellular metabolic process	5.66318e-10	0
biological_process	GO:0071704	organic substance metabolic process	5.97568e-10	0
biological_process	GO:0045786	negative regulation of cell cycle	7.35691e-10	0
biological_process	GO:0007167	enzyme linked receptor protein signaling pathway	7.35736e-10	0
biological_process	GO:0051338	regulation of transferase activity	8.7299e-10	0
biological_process	GO:0022616	DNA strand elongation	9.08846e-10	0
cellular_component	GO:0043228	non-membrane-bounded organelle	9.75961e-10	0
cellular_component	GO:0031967	organelle envelope	1.03683e-09	0
cellular_component	GO:0031975	envelope	1.03683e-09	0
molecular_function	GO:0140097	catalytic activity, acting on DNA	1.07451e-09	0
biological_process	GO:0044085	cellular component biogenesis	1.08015e-09	0
biological_process	GO:0009628	response to abiotic stimulus	1.24115e-09	0
biological_process	GO:0031325	positive regulation of cellular metabolic process	1.35233e-09	0
cellular_component	GO:0043232	intracellular non-membrane-bounded organelle	1.40605e-09	0
biological_process	GO:0006270	DNA replication initiation	1.4802e-09	0
biological_process	GO:0044267	cellular protein metabolic process	1.50837e-09	0
molecular_function	GO:0017076	purine nucleotide binding	1.53446e-09	0
cellular_component	GO:0098805	whole membrane	1.6371e-09	0
biological_process	GO:0032201	telomere maintenance via semi-conservative replication	1.80642e-09	0
biological_process	GO:0007169	transmembrane receptor protein tyrosine kinase signaling pathway	1.96775e-09	0
biological_process	GO:0019538	protein metabolic process	2.00136e-09	0
biological_process	GO:0051641	cellular localization	2.11701e-09	0
biological_process	GO:0032774	RNA biosynthetic process	2.4004e-09	0
biological_process	GO:0048583	regulation of response to stimulus	2.6596e-09	0
biological_process	GO:0044283	small molecule biosynthetic process	2.69833e-09	0
molecular_function	GO:0032553	ribonucleotide binding	2.74282e-09	0
molecular_function	GO:0035639	purine ribonucleoside triphosphate binding	3.22738e-09	0
molecular_function	GO:0030554	adenyl nucleotide binding	3.51203e-09	0
biological_process	GO:0009889	regulation of biosynthetic process	3.51944e-09	0
biological_process	GO:0051246	regulation of protein metabolic process	3.52407e-09	0
biological_process	GO:0019219	regulation of nucleobase-containing compound metabolic process	3.69354e-09	0
biological_process	GO:0031399	regulation of protein modification process	3.70488e-09	0
biological_process	GO:0051716	cellular response to stimulus	4.03955e-09	0
biological_process	GO:0097659	nucleic acid-templated transcription	4.94227e-09	0
biological_process	GO:0006351	transcription, DNA-templated	5.08915e-09	0
biological_process	GO:0140014	mitotic nuclear division	6.07143e-09	0
biological_process	GO:0000122	negative regulation of transcription by RNA polymerase II	6.32425e-09	0
biological_process	GO:0009888	tissue development	6.39065e-09	0
biological_process	GO:0006281	DNA repair	6.69092e-09	0
molecular_function	GO:0005524	ATP binding	6.77467e-09	0
molecular_function	GO:0032555	purine ribonucleotide binding	7.22379e-09	0
molecular_function	GO:0043168	anion binding	8.38086e-09	0
biological_process	GO:0006139	nucleobase-containing compound metabolic process	8.58848e-09	0
biological_process	GO:0051172	negative regulation of nitrogen compound metabolic process	1.12181e-08	0
cellular_component	GO:0005740	mitochondrial envelope	1.26296e-08	0
biological_process	GO:0080134	regulation of response to stress	1.42638e-08	0
molecular_function	GO:0032559	adenyl ribonucleotide binding	1.44569e-08	0
biological_process	GO:0051130	positive regulation of cellular component organization	1.46345e-08	0
molecular_function	GO:0004386	helicase activity	1.59336e-08	0
biological_process	GO:0051173	positive regulation of nitrogen compound metabolic process	1.60027e-08	0
molecular_function	GO:0019899	enzyme binding	1.66155e-08	0
biological_process	GO:0071495	cellular response to endogenous stimulus	1.69392e-08	0
biological_process	GO:0051247	positive regulation of protein metabolic process	1.82129e-08	0
biological_process	GO:0009653	anatomical structure morphogenesis	1.92808e-08	0
biological_process	GO:0006915	apoptotic process	1.99124e-08	0
biological_process	GO:0044839	cell cycle G2/M phase transition	2.02028e-08	0
biological_process	GO:0023056	positive regulation of signaling	2.18026e-08	0
biological_process	GO:0007346	regulation of mitotic cell cycle	2.44918e-08	0
biological_process	GO:0051234	establishment of localization	2.47439e-08	0
biological_process	GO:0022607	cellular component assembly	2.85659e-08	0
biological_process	GO:1901700	response to oxygen-containing compound	2.95057e-08	0
molecular_function	GO:0008144	drug binding	3.16486e-08	0
biological_process	GO:0043549	regulation of kinase activity	3.30986e-08	0
biological_process	GO:0048585	negative regulation of response to stimulus	3.32596e-08	0
biological_process	GO:0007017	microtubule-based process	3.58716e-08	0
biological_process	GO:0009894	regulation of catabolic process	3.76631e-08	0
biological_process	GO:0010647	positive regulation of cell communication	3.80569e-08	0
biological_process	GO:0050794	regulation of cellular process	3.84241e-08	0
cellular_component	GO:0030054	cell junction	3.97593e-08	0
biological_process	GO:0033993	response to lipid	4.08239e-08	0
biological_process	GO:0035966	response to topologically incorrect protein	4.29062e-08	0
cellular_component	GO:0031982	vesicle	4.44215e-08	0
cellular_component	GO:0031966	mitochondrial membrane	4.71272e-08	0
molecular_function	GO:0097367	carbohydrate derivative binding	4.84185e-08	0
biological_process	GO:0048731	system development	4.99123e-08	0
molecular_function	GO:0003678	DNA helicase activity	5.01509e-08	0
molecular_function	GO:0017116	single-stranded DNA helicase activity	5.04721e-08	0
biological_process	GO:0045859	regulation of protein kinase activity	5.1155e-08	0
biological_process	GO:0008283	cell population proliferation	5.23183e-08	0
biological_process	GO:0055114	oxidation-reduction process	6.61901e-08	0
molecular_function	GO:0008094	DNA-dependent ATPase activity	6.70989e-08	0
molecular_function	GO:0017111	nucleoside-triphosphatase activity	6.80545e-08	0
cellular_component	GO:0005815	microtubule organizing center	7.07117e-08	0
biological_process	GO:0035967	cellular response to topologically incorrect protein	7.21089e-08	0
biological_process	GO:0010556	regulation of macromolecule biosynthetic process	7.46436e-08	0
biological_process	GO:0006810	transport	7.5678e-08	0
biological_process	GO:0032392	DNA geometric change	8.47144e-08	0
biological_process	GO:0006366	transcription by RNA polymerase II	8.72428e-08	0
cellular_component	GO:0070161	anchoring junction	9.15985e-08	0
biological_process	GO:0031326	regulation of cellular biosynthetic process	9.86839e-08	0
biological_process	GO:0009725	response to hormone	9.9512e-08	0
biological_process	GO:0001889	liver development	1.03544e-07	0
molecular_function	GO:0043167	ion binding	1.13515e-07	0
cellular_component	GO:0005874	microtubule	1.1618e-07	0
molecular_function	GO:0016301	kinase activity	1.19224e-07	0
biological_process	GO:0032268	regulation of cellular protein metabolic process	1.21116e-07	0
biological_process	GO:0032502	developmental process	1.21527e-07	0
molecular_function	GO:0016887	ATPase activity	1.37432e-07	0
biological_process	GO:0034620	cellular response to unfolded protein	1.38589e-07	0
biological_process	GO:0006986	response to unfolded protein	1.43867e-07	0
molecular_function	GO:0016773	phosphotransferase activity, alcohol group as acceptor	1.47848e-07	0
biological_process	GO:0000086	G2/M transition of mitotic cell cycle	1.49064e-07	0
biological_process	GO:0051252	regulation of RNA metabolic process	1.51178e-07	0
biological_process	GO:0032270	positive regulation of cellular protein metabolic process	1.58722e-07	0
biological_process	GO:0032508	DNA duplex unwinding	1.65147e-07	0
biological_process	GO:0000280	nuclear division	1.72092e-07	0
cellular_component	GO:0098588	bounding membrane of organelle	1.97366e-07	0
biological_process	GO:0051640	organelle localization	2.0002e-07	0
biological_process	GO:0007399	nervous system development	2.05467e-07	0
biological_process	GO:0009967	positive regulation of signal transduction	2.17206e-07	0
biological_process	GO:0061008	hepaticobiliary system development	2.25843e-07	0
biological_process	GO:0009968	negative regulation of signal transduction	2.7535e-07	0
biological_process	GO:0000070	mitotic sister chromatid segregation	2.9842e-07	0
molecular_function	GO:0016772	transferase activity, transferring phosphorus-containing groups	3.18257e-07	0
biological_process	GO:0048856	anatomical structure development	3.27823e-07	0
biological_process	GO:0023057	negative regulation of signaling	3.37345e-07	0
biological_process	GO:0010648	negative regulation of cell communication	3.64322e-07	0
biological_process	GO:0048519	negative regulation of biological process	3.82546e-07	0
biological_process	GO:0090304	nucleic acid metabolic process	3.94333e-07	0
biological_process	GO:0000819	sister chromatid segregation	4.02097e-07	0
biological_process	GO:0080135	regulation of cellular response to stress	4.34762e-07	0
biological_process	GO:0006297	nucleotide-excision repair, DNA gap filling	4.56076e-07	0
biological_process	GO:0048513	animal organ development	4.58452e-07	0
biological_process	GO:0031329	regulation of cellular catabolic process	4.66685e-07	0
biological_process	GO:0051276	chromosome organization	4.72589e-07	0
molecular_function	GO:0016491	oxidoreductase activity	4.7496e-07	0
biological_process	GO:0001932	regulation of protein phosphorylation	4.7752e-07	0
biological_process	GO:2000112	regulation of cellular macromolecule biosynthetic process	5.00386e-07	0
biological_process	GO:0044093	positive regulation of molecular function	5.03421e-07	0
molecular_function	GO:0016462	pyrophosphatase activity	5.07058e-07	0
biological_process	GO:0072331	signal transduction by p53 class mediator	5.1107e-07	0
biological_process	GO:0051347	positive regulation of transferase activity	5.19218e-07	0
biological_process	GO:0048732	gland development	5.38751e-07	0
biological_process	GO:0000226	microtubule cytoskeleton organization	5.81225e-07	0
biological_process	GO:0045787	positive regulation of cell cycle	6.11222e-07	0
cellular_component	GO:0005813	centrosome	6.61118e-07	0
biological_process	GO:0051174	regulation of phosphorus metabolic process	6.61534e-07	0
molecular_function	GO:0016817	hydrolase activity, acting on acid anhydrides	6.64485e-07	0
molecular_function	GO:0016818	hydrolase activity, acting on acid anhydrides, in phosphorus-containing anhydrides	6.64485e-07	0
biological_process	GO:0030030	cell projection organization	7.66836e-07	0
cellular_component	GO:0031410	cytoplasmic vesicle	7.71324e-07	0
biological_process	GO:0012501	programmed cell death	7.77589e-07	0
biological_process	GO:0031401	positive regulation of protein modification process	7.85297e-07	0
biological_process	GO:2001141	regulation of RNA biosynthetic process	7.86286e-07	0
cellular_component	GO:0098687	chromosomal region	7.91744e-07	0
biological_process	GO:0019220	regulation of phosphate metabolic process	8.0158e-07	0
biological_process	GO:0042981	regulation of apoptotic process	8.32758e-07	0
biological_process	GO:0019752	carboxylic acid metabolic process	8.4804e-07	0
cellular_component	GO:0097708	intracellular vesicle	9.01713e-07	0
biological_process	GO:0006695	cholesterol biosynthetic process	9.03569e-07	0
biological_process	GO:0008104	protein localization	9.72697e-07	0
biological_process	GO:1903506	regulation of nucleic acid-templated transcription	1.01632e-06	0
biological_process	GO:0043085	positive regulation of catalytic activity	1.03117e-06	0
biological_process	GO:0048285	organelle fission	1.0905e-06	0
biological_process	GO:0007059	chromosome segregation	1.15304e-06	0
cellular_component	GO:0034399	nuclear periphery	1.15781e-06	0
biological_process	GO:0006355	regulation of transcription, DNA-templated	1.22488e-06	0
biological_process	GO:0042325	regulation of phosphorylation	1.23112e-06	0
biological_process	GO:0000075	cell cycle checkpoint	1.25606e-06	0
molecular_function	GO:0003688	DNA replication origin binding	2.02162e-06	0
molecular_function	GO:0048037	cofactor binding	2.39814e-06	0
cellular_component	GO:0005694	chromosome	2.42018e-06	0
molecular_function	GO:1901363	heterocyclic compound binding	3.45145e-06	0
cellular_component	GO:0019866	organelle inner membrane	4.19794e-06	0
molecular_function	GO:0051087	chaperone binding	4.66075e-06	0
molecular_function	GO:0097159	organic cyclic compound binding	5.2536e-06	0
cellular_component	GO:1905348	endonuclease complex	9.03624e-06	0
cellular_component	GO:0005819	spindle	9.12544e-06	0
cellular_component	GO:0005657	replication fork	1.44392e-05	0
cellular_component	GO:0061695	transferase complex, transferring phosphorus-containing groups	1.77094e-05	0
cellular_component	GO:0005743	mitochondrial inner membrane	1.77344e-05	0
cellular_component	GO:0005911	cell-cell junction	2.03316e-05	0
cellular_component	GO:0099503	secretory vesicle	2.1134e-05	0
biological_process	GO:1902653	secondary alcohol biosynthetic process	1.27374e-06	0.01
biological_process	GO:0007051	spindle organization	1.34545e-06	0.01
biological_process	GO:0042769	DNA damage response, detection of DNA damage	1.35387e-06	0.01
biological_process	GO:0071103	DNA conformation change	1.42786e-06	0.01
biological_process	GO:0062197	cellular response to chemical stress	1.49377e-06	0.01
biological_process	GO:0006082	organic acid metabolic process	1.51692e-06	0.01
biological_process	GO:0043067	regulation of programmed cell death	1.69257e-06	0.01
biological_process	GO:0008219	cell death	1.77891e-06	0.01
biological_process	GO:0032886	regulation of microtubule-based process	1.79448e-06	0.01
biological_process	GO:1901617	organic hydroxy compound biosynthetic process	1.79995e-06	0.01
biological_process	GO:0050896	response to stimulus	1.83906e-06	0.01
biological_process	GO:0019222	regulation of metabolic process	1.91236e-06	0.01
biological_process	GO:0120036	plasma membrane bounded cell projection organization	1.95388e-06	0.01
biological_process	GO:0007010	cytoskeleton organization	1.99091e-06	0.01
biological_process	GO:0016126	sterol biosynthetic process	1.99167e-06	0.01
biological_process	GO:0097193	intrinsic apoptotic signaling pathway	2.03238e-06	0.01
biological_process	GO:0034976	response to endoplasmic reticulum stress	2.17871e-06	0.01
biological_process	GO:0006275	regulation of DNA replication	2.31693e-06	0.01
biological_process	GO:0006979	response to oxidative stress	2.40147e-06	0.01
biological_process	GO:1901987	regulation of cell cycle phase transition	2.60454e-06	0.01
biological_process	GO:0070507	regulation of microtubule cytoskeleton organization	2.65754e-06	0.01
biological_process	GO:0009987	cellular process	2.71784e-06	0.01
biological_process	GO:0010941	regulation of cell death	2.75289e-06	0.01
molecular_function	GO:0016740	transferase activity	9.56784e-06	0.01
molecular_function	GO:0042802	identical protein binding	9.6532e-06	0.01
molecular_function	GO:0019900	kinase binding	2.32612e-05	0.01
cellular_component	GO:0012506	vesicle membrane	2.77252e-05	0.01
cellular_component	GO:0005788	endoplasmic reticulum lumen	2.8036e-05	0.01
cellular_component	GO:0031390	Ctf18 RFC-like complex	2.81556e-05	0.01
molecular_function	GO:0050662	coenzyme binding	3.62046e-05	0.01
molecular_function	GO:0004672	protein kinase activity	4.97287e-05	0.01
biological_process	GO:0010506	regulation of autophagy	3.08256e-06	0.02
biological_process	GO:0030968	endoplasmic reticulum unfolded protein response	3.15008e-06	0.02
biological_process	GO:0071900	regulation of protein serine/threonine kinase activity	3.15077e-06	0.02
biological_process	GO:0007275	multicellular organism development	3.16164e-06	0.02
biological_process	GO:0097190	apoptotic signaling pathway	3.30938e-06	0.02
biological_process	GO:0006357	regulation of transcription by RNA polymerase II	3.39596e-06	0.02
biological_process	GO:0034599	cellular response to oxidative stress	3.64555e-06	0.02
biological_process	GO:0051253	negative regulation of RNA metabolic process	3.64826e-06	0.02
cellular_component	GO:0016363	nuclear matrix	3.45935e-05	0.02
molecular_function	GO:0019901	protein kinase binding	8.82956e-05	0.02
biological_process	GO:0018212	peptidyl-tyrosine modification	3.6725e-06	0.03
biological_process	GO:0009056	catabolic process	3.87635e-06	0.03
biological_process	GO:0051649	establishment of localization in cell	3.9388e-06	0.03
biological_process	GO:0006766	vitamin metabolic process	3.94047e-06	0.03
biological_process	GO:0045934	negative regulation of nucleobase-containing compound metabolic process	4.37604e-06	0.03
biological_process	GO:0097711	ciliary basal body-plasma membrane docking	4.46446e-06	0.03
biological_process	GO:0018108	peptidyl-tyrosine phosphorylation	4.50938e-06	0.03
biological_process	GO:0043436	oxoacid metabolic process	4.55113e-06	0.03
biological_process	GO:1901701	cellular response to oxygen-containing compound	4.57933e-06	0.03
biological_process	GO:0051302	regulation of cell division	4.81144e-06	0.03
biological_process	GO:0001933	negative regulation of protein phosphorylation	4.91619e-06	0.03
biological_process	GO:0007088	regulation of mitotic nuclear division	5.00105e-06	0.03
biological_process	GO:0006767	water-soluble vitamin metabolic process	5.32859e-06	0.03
biological_process	GO:0044248	cellular catabolic process	5.46923e-06	0.03
biological_process	GO:0000727	double-strand break repair via break-induced replication	5.56087e-06	0.03
biological_process	GO:0033036	macromolecule localization	5.64007e-06	0.03
biological_process	GO:0006066	alcohol metabolic process	6.0632e-06	0.03
biological_process	GO:0009991	response to extracellular stimulus	6.13971e-06	0.03
biological_process	GO:0071702	organic substance transport	6.20296e-06	0.03
biological_process	GO:1902652	secondary alcohol metabolic process	6.32687e-06	0.03
biological_process	GO:1901615	organic hydroxy compound metabolic process	6.37353e-06	0.03
molecular_function	GO:0008092	cytoskeletal protein binding	9.73342e-05	0.03
biological_process	GO:0031570	DNA integrity checkpoint	6.56565e-06	0.04
biological_process	GO:0001101	response to acid chemical	6.66839e-06	0.04
biological_process	GO:0090181	regulation of cholesterol metabolic process	6.95769e-06	0.04
biological_process	GO:0071496	cellular response to external stimulus	7.2093e-06	0.04
biological_process	GO:0009611	response to wounding	7.38872e-06	0.04
biological_process	GO:0000076	DNA replication checkpoint	7.85119e-06	0.04
biological_process	GO:0006984	ER-nucleus signaling pathway	8.01108e-06	0.04
biological_process	GO:0006289	nucleotide-excision repair	8.10156e-06	0.04
biological_process	GO:0045892	negative regulation of transcription, DNA-templated	8.17099e-06	0.04
biological_process	GO:0051783	regulation of nuclear division	8.38934e-06	0.04
biological_process	GO:0062012	regulation of small molecule metabolic process	8.39482e-06	0.04
biological_process	GO:0010942	positive regulation of cell death	8.49639e-06	0.04
biological_process	GO:0008203	cholesterol metabolic process	8.60839e-06	0.04
biological_process	GO:0010628	positive regulation of gene expression	8.69352e-06	0.04
biological_process	GO:0006914	autophagy	8.70835e-06	0.04
biological_process	GO:0061919	process utilizing autophagic mechanism	8.70835e-06	0.04
biological_process	GO:0034097	response to cytokine	8.80066e-06	0.04
biological_process	GO:1903507	negative regulation of nucleic acid-templated transcription	8.99628e-06	0.04
biological_process	GO:1901990	regulation of mitotic cell cycle phase transition	9.16154e-06	0.04
biological_process	GO:0042326	negative regulation of phosphorylation	9.36671e-06	0.04
biological_process	GO:0043065	positive regulation of apoptotic process	9.48763e-06	0.04
biological_process	GO:0007166	cell surface receptor signaling pathway	9.64658e-06	0.04
biological_process	GO:0007050	cell cycle arrest	9.74651e-06	0.04
biological_process	GO:0042221	response to chemical	1.00341e-05	0.05
biological_process	GO:1902679	negative regulation of RNA biosynthetic process	1.02079e-05	0.05
biological_process	GO:0072359	circulatory system development	1.16139e-05	0.05
biological_process	GO:0042127	regulation of cell population proliferation	1.17389e-05	0.05
biological_process	GO:1902533	positive regulation of intracellular signal transduction	1.18957e-05	0.05
biological_process	GO:0048871	multicellular organismal homeostasis	1.23452e-05	0.05
cellular_component	GO:1902494	catalytic complex	7.30899e-05	0.05
cellular_component	GO:1902554	serine/threonine protein kinase complex	7.8299e-05	0.05
cellular_component	GO:0005925	focal adhesion	8.07737e-05	0.05
biological_process	GO:0007093	mitotic cell cycle checkpoint	1.36131e-05	0.06
biological_process	GO:0044843	cell cycle G1/S phase transition	1.37015e-05	0.06
biological_process	GO:0090068	positive regulation of cell cycle process	1.37015e-05	0.06
cellular_component	GO:0000793	condensed chromosome	0.000134158	0.06
biological_process	GO:0010557	positive regulation of macromolecule biosynthetic process	1.43395e-05	0.07
biological_process	GO:0060429	epithelium development	1.43575e-05	0.07
biological_process	GO:0051248	negative regulation of protein metabolic process	1.47602e-05	0.07
biological_process	GO:0071897	DNA biosynthetic process	1.57819e-05	0.07
biological_process	GO:0016125	sterol metabolic process	1.63763e-05	0.07
biological_process	GO:0006283	transcription-coupled nucleotide-excision repair	1.64694e-05	0.07
biological_process	GO:0031668	cellular response to extracellular stimulus	1.77079e-05	0.07
biological_process	GO:0034470	ncRNA processing	1.83217e-05	0.07
biological_process	GO:0043068	positive regulation of programmed cell death	1.88307e-05	0.07
biological_process	GO:0019725	cellular homeostasis	1.9373e-05	0.07
biological_process	GO:0060548	negative regulation of cell death	1.93838e-05	0.07
biological_process	GO:0071363	cellular response to growth factor stimulus	2.07509e-05	0.07
biological_process	GO:0009410	response to xenobiotic stimulus	2.08164e-05	0.07
biological_process	GO:0051239	regulation of multicellular organismal process	2.08445e-05	0.07
cellular_component	GO:0043230	extracellular organelle	0.000137475	0.07
cellular_component	GO:0000922	spindle pole	0.000140793	0.07
biological_process	GO:0006887	exocytosis	2.24973e-05	0.08
biological_process	GO:0031400	negative regulation of protein modification process	2.28047e-05	0.08
biological_process	GO:0042276	error-prone translesion synthesis	2.31878e-05	0.08
biological_process	GO:0040007	growth	2.51802e-05	0.08
cellular_component	GO:0000794	condensed nuclear chromosome	0.000145492	0.08
biological_process	GO:0000083	regulation of transcription involved in G1/S transition of mitotic cell cycle	2.52033e-05	0.09
biological_process	GO:0000079	regulation of cyclin-dependent protein serine/threonine kinase activity	2.67344e-05	0.09
biological_process	GO:0098813	nuclear chromosome segregation	2.71183e-05	0.09
biological_process	GO:1902749	regulation of cell cycle G2/M phase transition	2.89937e-05	0.1
biological_process	GO:0034613	cellular protein localization	2.9003e-05	0.1
biological_process	GO:0000165	MAPK cascade	3.00962e-05	0.1
biological_process	GO:0051493	regulation of cytoskeleton organization	3.05519e-05	0.1
biological_process	GO:1902969	mitotic DNA replication	3.14232e-05	0.1
biological_process	GO:0023014	signal transduction by protein phosphorylation	3.17707e-05	0.1
cellular_component	GO:0030055	cell-substrate junction	0.000159667	0.1
cellular_component	GO:0045121	membrane raft	0.000170578	0.1
molecular_function	GO:0003689	DNA clamp loader activity	0.000172635	0.1
molecular_function	GO:0033170	protein-DNA loading ATPase activity	0.000172635	0.1
biological_process	GO:0010638	positive regulation of organelle organization	3.22004e-05	0.11
biological_process	GO:0033674	positive regulation of kinase activity	3.29733e-05	0.11
biological_process	GO:0010948	negative regulation of cell cycle process	3.33989e-05	0.11
biological_process	GO:0045936	negative regulation of phosphate metabolic process	3.34731e-05	0.11
biological_process	GO:0071396	cellular response to lipid	3.454e-05	0.11
cellular_component	GO:0045177	apical part of cell	0.000185391	0.11
cellular_component	GO:0098857	membrane microdomain	0.00019011	0.11
cellular_component	GO:0005759	mitochondrial matrix	0.000197226	0.11
cellular_component	GO:1902911	protein kinase complex	0.000199212	0.11
cellular_component	GO:0070062	extracellular exosome	0.000210307	0.11
cellular_component	GO:1903561	extracellular vesicle	0.000219025	0.11
cellular_component	GO:0000781	chromosome, telomeric region	0.000225016	0.11
cellular_component	GO:0042575	DNA polymerase complex	0.000226436	0.11
biological_process	GO:0006732	coenzyme metabolic process	3.61607e-05	0.12
biological_process	GO:0070727	cellular macromolecule localization	3.63983e-05	0.12
biological_process	GO:0010563	negative regulation of phosphorus metabolic process	3.65431e-05	0.12
biological_process	GO:0140352	export from cell	3.68781e-05	0.12
biological_process	GO:0045540	regulation of cholesterol biosynthetic process	3.81574e-05	0.12
biological_process	GO:0106118	regulation of sterol biosynthetic process	3.81574e-05	0.12
biological_process	GO:0065007	biological regulation	3.83209e-05	0.12
biological_process	GO:0032870	cellular response to hormone stimulus	3.93825e-05	0.12
biological_process	GO:0022008	neurogenesis	4e-05	0.12
biological_process	GO:0000902	cell morphogenesis	4.01976e-05	0.12
biological_process	GO:0034219	carbohydrate transmembrane transport	4.02489e-05	0.12
molecular_function	GO:0001217	DNA-binding transcription repressor activity	0.000193848	0.12
molecular_function	GO:0001227	DNA-binding transcription repressor activity, RNA polymerase II-specific	0.000193848	0.12
cellular_component	GO:0005794	Golgi apparatus	0.000235283	0.12
cellular_component	GO:0030659	cytoplasmic vesicle membrane	0.000238911	0.12
cellular_component	GO:0098589	membrane region	0.000242667	0.12
cellular_component	GO:1902555	endoribonuclease complex	0.000244193	0.12
biological_process	GO:0009891	positive regulation of biosynthetic process	4.07019e-05	0.13
biological_process	GO:1901796	regulation of signal transduction by p53 class mediator	4.16438e-05	0.13
biological_process	GO:0032940	secretion by cell	4.18286e-05	0.13
biological_process	GO:0043066	negative regulation of apoptotic process	4.23414e-05	0.14
biological_process	GO:0032879	regulation of localization	4.23862e-05	0.14
biological_process	GO:2001233	regulation of apoptotic signaling pathway	4.2877e-05	0.14
biological_process	GO:0045860	positive regulation of protein kinase activity	4.36588e-05	0.14
biological_process	GO:0090329	regulation of DNA-dependent DNA replication	4.41766e-05	0.14
molecular_function	GO:0004904	interferon receptor activity	0.000203656	0.14
biological_process	GO:0071548	response to dexamethasone	4.48972e-05	0.15
biological_process	GO:0036499	PERK-mediated unfolded protein response	4.55432e-05	0.15
biological_process	GO:0010035	response to inorganic substance	4.59226e-05	0.15
biological_process	GO:0048545	response to steroid hormone	4.68852e-05	0.16
biological_process	GO:0045935	positive regulation of nucleobase-containing compound metabolic process	4.7554e-05	0.16
biological_process	GO:0043170	macromolecule metabolic process	4.76404e-05	0.16
biological_process	GO:0014070	response to organic cyclic compound	4.78627e-05	0.16
biological_process	GO:0031667	response to nutrient levels	4.86824e-05	0.16
cellular_component	GO:0098590	plasma membrane region	0.000324099	0.16
cellular_component	GO:0005875	microtubule associated complex	0.000359072	0.16
cellular_component	GO:0005789	endoplasmic reticulum membrane	0.000410758	0.16
biological_process	GO:0000731	DNA synthesis involved in DNA repair	5.43217e-05	0.17
biological_process	GO:0009890	negative regulation of biosynthetic process	5.51582e-05	0.17
biological_process	GO:0045055	regulated exocytosis	5.54838e-05	0.17
biological_process	GO:0043069	negative regulation of programmed cell death	5.8182e-05	0.17
biological_process	GO:0140056	organelle localization by membrane tethering	5.91078e-05	0.17
biological_process	GO:0031328	positive regulation of cellular biosynthetic process	6.10868e-05	0.17
molecular_function	GO:0051787	misfolded protein binding	0.000237398	0.17
biological_process	GO:2001242	regulation of intrinsic apoptotic signaling pathway	6.27747e-05	0.18
biological_process	GO:0015749	monosaccharide transmembrane transport	6.31366e-05	0.18
biological_process	GO:0008643	carbohydrate transport	6.6121e-05	0.18
biological_process	GO:1904029	regulation of cyclin-dependent protein kinase activity	6.63937e-05	0.18
biological_process	GO:1902850	microtubule cytoskeleton organization involved in mitosis	6.66555e-05	0.18
biological_process	GO:0070848	response to growth factor	6.69921e-05	0.18
biological_process	GO:0019985	translesion synthesis	6.71089e-05	0.18
biological_process	GO:0007005	mitochondrion organization	6.72579e-05	0.18
biological_process	GO:0051186	cofactor metabolic process	6.75586e-05	0.18
biological_process	GO:0009790	embryo development	7.01923e-05	0.18
molecular_function	GO:0043138	3'-5' DNA helicase activity	0.000246014	0.18
biological_process	GO:0061684	chaperone-mediated autophagy	7.071e-05	0.19
biological_process	GO:0044092	negative regulation of molecular function	7.1025e-05	0.19
biological_process	GO:0046903	secretion	7.18644e-05	0.19
biological_process	GO:0090305	nucleic acid phosphodiester bond hydrolysis	7.29532e-05	0.19
biological_process	GO:0001558	regulation of cell growth	7.31946e-05	0.19
biological_process	GO:0007154	cell communication	7.37955e-05	0.19
biological_process	GO:0000082	G1/S transition of mitotic cell cycle	7.54295e-05	0.19
biological_process	GO:0071705	nitrogen compound transport	7.6356e-05	0.19
biological_process	GO:0046165	alcohol biosynthetic process	7.71459e-05	0.19
biological_process	GO:0048017	inositol lipid-mediated signaling	7.92837e-05	0.19
biological_process	GO:0008202	steroid metabolic process	8.02446e-05	0.19
biological_process	GO:0045184	establishment of protein localization	8.11282e-05	0.19
molecular_function	GO:0019904	protein domain specific binding	0.00025156	0.19
molecular_function	GO:0030276	clathrin binding	0.000251812	0.19
molecular_function	GO:0015631	tubulin binding	0.000301111	0.19
cellular_component	GO:0042995	cell projection	0.000468635	0.19
molecular_function	GO:0008017	microtubule binding	0.000322175	0.2
biological_process	GO:0035404	histone-serine phosphorylation	8.19062e-05	0.21
biological_process	GO:0009605	response to external stimulus	8.38959e-05	0.22
biological_process	GO:0071466	cellular response to xenobiotic stimulus	8.4759e-05	0.23
biological_process	GO:0060249	anatomical structure homeostasis	8.63475e-05	0.23
biological_process	GO:1901652	response to peptide	8.63925e-05	0.23
biological_process	GO:0031110	regulation of microtubule polymerization or depolymerization	8.66531e-05	0.23
biological_process	GO:1902532	negative regulation of intracellular signal transduction	8.92085e-05	0.23
biological_process	GO:0045216	cell-cell junction organization	9.26245e-05	0.23
molecular_function	GO:0051082	unfolded protein binding	0.000447651	0.23
molecular_function	GO:0044389	ubiquitin-like protein ligase binding	0.000464305	0.23
cellular_component	GO:0000796	condensin complex	0.000497053	0.23
cellular_component	GO:0000139	Golgi membrane	0.00052783	0.23
cellular_component	GO:0042175	nuclear outer membrane-endoplasmic reticulum membrane network	0.000563672	0.23
cellular_component	GO:0098798	mitochondrial protein complex	0.000599927	0.23
cellular_component	GO:0101002	ficolin-1-rich granule	0.000615589	0.23
cellular_component	GO:1904813	ficolin-1-rich granule lumen	0.000615589	0.23
cellular_component	GO:0000228	nuclear chromosome	0.000629677	0.23
cellular_component	GO:0030424	axon	0.000629677	0.23
cellular_component	GO:0043596	nuclear replication fork	0.00067507	0.23
cellular_component	GO:0005773	vacuole	0.000688625	0.23
biological_process	GO:0010243	response to organonitrogen compound	9.59214e-05	0.24
biological_process	GO:0022411	cellular component disassembly	9.71797e-05	0.24
biological_process	GO:0051050	positive regulation of transport	9.74265e-05	0.24
biological_process	GO:0051240	positive regulation of multicellular organismal process	9.79657e-05	0.24
biological_process	GO:0008645	hexose transmembrane transport	9.86152e-05	0.24
biological_process	GO:1904659	glucose transmembrane transport	0.000101775	0.24
biological_process	GO:0010558	negative regulation of macromolecule biosynthetic process	0.000102033	0.24
biological_process	GO:0042176	regulation of protein catabolic process	0.000103964	0.25
biological_process	GO:0038127	ERBB signaling pathway	0.000105254	0.25
biological_process	GO:0038128	ERBB2 signaling pathway	0.000108919	0.25
biological_process	GO:0006457	protein folding	0.000114422	0.26
biological_process	GO:0048008	platelet-derived growth factor receptor signaling pathway	0.000115921	0.27
molecular_function	GO:0016655	oxidoreductase activity, acting on NAD(P)H, quinone or similar compound as acceptor	0.000582366	0.27
cellular_component	GO:0005652	nuclear lamina	0.000718466	0.27
cellular_component	GO:0043296	apical junction complex	0.000721477	0.27
cellular_component	GO:0005783	endoplasmic reticulum	0.000734868	0.27
biological_process	GO:1901565	organonitrogen compound catabolic process	0.000116616	0.28
biological_process	GO:0051054	positive regulation of DNA metabolic process	0.000117046	0.28
biological_process	GO:0033683	nucleotide-excision repair, DNA incision	0.000118699	0.28
biological_process	GO:0030198	extracellular matrix organization	0.000119904	0.28
molecular_function	GO:0050839	cell adhesion molecule binding	0.000640991	0.28
biological_process	GO:0051098	regulation of binding	0.000122492	0.3
biological_process	GO:0022406	membrane docking	0.000123932	0.32
biological_process	GO:0043434	response to peptide hormone	0.000124839	0.33
biological_process	GO:0048872	homeostasis of number of cells	0.000124869	0.33
biological_process	GO:0010389	regulation of G2/M transition of mitotic cell cycle	0.000126309	0.33
biological_process	GO:0050793	regulation of developmental process	0.000126377	0.33
biological_process	GO:0009887	animal organ morphogenesis	0.000126796	0.33
biological_process	GO:0035295	tube development	0.000130254	0.33
biological_process	GO:0010639	negative regulation of organelle organization	0.000132266	0.34
cellular_component	GO:0005764	lysosome	0.000852226	0.35
biological_process	GO:0043062	extracellular structure organization	0.000132962	0.36
biological_process	GO:0031327	negative regulation of cellular biosynthetic process	0.000136416	0.36
biological_process	GO:0048878	chemical homeostasis	0.000136647	0.36
biological_process	GO:0042060	wound healing	0.000137266	0.36
biological_process	GO:0050730	regulation of peptidyl-tyrosine phosphorylation	0.000137535	0.36
molecular_function	GO:0043184	vascular endothelial growth factor receptor 2 binding	0.000741359	0.36
cellular_component	GO:0000323	lytic vacuole	0.000908406	0.37
cellular_component	GO:0030141	secretory granule	0.0009985	0.38
cellular_component	GO:0001650	fibrillar center	0.00107187	0.38
biological_process	GO:0018193	peptidyl-amino acid modification	0.000152366	0.39
biological_process	GO:0043405	regulation of MAP kinase activity	0.000155186	0.39
molecular_function	GO:1990837	sequence-specific double-stranded DNA binding	0.000904522	0.4
cellular_component	GO:0030136	clathrin-coated vesicle	0.00112409	0.4
cellular_component	GO:0070382	exocytic vesicle	0.00112597	0.4
cellular_component	GO:0005768	endosome	0.00118023	0.41
cellular_component	GO:0016323	basolateral plasma membrane	0.0011841	0.41
cellular_component	GO:0030665	clathrin-coated vesicle membrane	0.00126196	0.42
cellular_component	GO:0098833	presynaptic endocytic zone	0.00127535	0.42
biological_process	GO:0042816	vitamin B6 metabolic process	0.000157241	0.43
biological_process	GO:0043987	histone H3-S10 phosphorylation	0.000157241	0.43
biological_process	GO:0007052	mitotic spindle organization	0.000158958	0.43
biological_process	GO:0044774	mitotic DNA integrity checkpoint	0.000158958	0.43
biological_process	GO:0006267	pre-replicative complex assembly involved in nuclear cell cycle DNA replication	0.000162478	0.47
biological_process	GO:0036388	pre-replicative complex assembly	0.000162478	0.47
biological_process	GO:1900262	regulation of DNA-directed DNA polymerase activity	0.000162478	0.47
biological_process	GO:1900264	positive regulation of DNA-directed DNA polymerase activity	0.000162478	0.47
biological_process	GO:1902299	pre-replicative complex assembly involved in cell cycle DNA replication	0.000162478	0.47
biological_process	GO:0048699	generation of neurons	0.000163627	0.48
cellular_component	GO:0042555	MCM complex	0.00147073	0.48
molecular_function	GO:0071208	histone pre-mRNA DCP binding	0.00111516	0.5
biological_process	GO:0043406	positive regulation of MAP kinase activity	0.000176234	0.51
biological_process	GO:0051304	chromosome separation	0.000176751	0.51
biological_process	GO:0016049	cell growth	0.000178644	0.51
biological_process	GO:0051049	regulation of transport	0.000181018	0.51
biological_process	GO:0001934	positive regulation of protein phosphorylation	0.000181463	0.51
molecular_function	GO:0044183	protein folding chaperone	0.00115482	0.51
cellular_component	GO:0016324	apical plasma membrane	0.00161037	0.51
biological_process	GO:0071902	positive regulation of protein serine/threonine kinase activity	0.000187374	0.52
biological_process	GO:0007417	central nervous system development	0.000187477	0.52
biological_process	GO:0045931	positive regulation of mitotic cell cycle	0.000190002	0.52
biological_process	GO:0051129	negative regulation of cellular component organization	0.000190716	0.52
biological_process	GO:0048015	phosphatidylinositol-mediated signaling	0.000195184	0.52
biological_process	GO:0010562	positive regulation of phosphorus metabolic process	0.000195858	0.52
biological_process	GO:0045937	positive regulation of phosphate metabolic process	0.000195858	0.52
biological_process	GO:0061448	connective tissue development	0.000198507	0.52
biological_process	GO:0071345	cellular response to cytokine stimulus	0.000205732	0.52
biological_process	GO:0060255	regulation of macromolecule metabolic process	0.000206349	0.52
biological_process	GO:1901698	response to nitrogen compound	0.000209671	0.53
cellular_component	GO:0120025	plasma membrane bounded cell projection	0.00170586	0.53
cellular_component	GO:0043005	neuron projection	0.0017696	0.53
cellular_component	GO:0030496	midbody	0.0018222	0.53
biological_process	GO:0006296	nucleotide-excision repair, DNA incision, 5'-to lesion	0.000209915	0.54
biological_process	GO:0050810	regulation of steroid biosynthetic process	0.000214951	0.54
biological_process	GO:0032269	negative regulation of cellular protein metabolic process	0.000220279	0.54
biological_process	GO:0043408	regulation of MAPK cascade	0.000221043	0.54
biological_process	GO:0015833	peptide transport	0.00022174	0.54
biological_process	GO:0007043	cell-cell junction assembly	0.000223509	0.54
biological_process	GO:0070925	organelle assembly	0.000224381	0.54
cellular_component	GO:0000779	condensed chromosome, centromeric region	0.0020166	0.54
biological_process	GO:0036293	response to decreased oxygen levels	0.000238846	0.55
biological_process	GO:2000113	negative regulation of cellular macromolecule biosynthetic process	0.000246367	0.55
biological_process	GO:0032787	monocarboxylic acid metabolic process	0.000249579	0.55
cellular_component	GO:0000775	chromosome, centromeric region	0.0020418	0.55
cellular_component	GO:0000313	organellar ribosome	0.00211802	0.56
cellular_component	GO:0005761	mitochondrial ribosome	0.00211802	0.56
biological_process	GO:0043276	anoikis	0.000252312	0.57
biological_process	GO:0042886	amide transport	0.000261073	0.57
biological_process	GO:0097327	response to antineoplastic agent	0.000265345	0.57
molecular_function	GO:0031625	ubiquitin protein ligase binding	0.00125861	0.57
cellular_component	GO:0016020	membrane	0.00212866	0.57
biological_process	GO:0006935	chemotaxis	0.000271508	0.58
cellular_component	GO:0005923	bicellular tight junction	0.00215259	0.59
biological_process	GO:0001944	vasculature development	0.000279875	0.61
cellular_component	GO:0000780	condensed nuclear chromosome, centromeric region	0.00216201	0.61
cellular_component	GO:0030894	replisome	0.00216201	0.61
biological_process	GO:0061097	regulation of protein tyrosine kinase activity	0.000280497	0.62
biological_process	GO:0045930	negative regulation of mitotic cell cycle	0.000284121	0.63
biological_process	GO:0001775	cell activation	0.000285328	0.63
biological_process	GO:0048729	tissue morphogenesis	0.00028562	0.63
biological_process	GO:0044087	regulation of cellular component biogenesis	0.000296798	0.64
biological_process	GO:0015031	protein transport	0.000297295	0.64
molecular_function	GO:0070851	growth factor receptor binding	0.00144555	0.64
molecular_function	GO:0003690	double-stranded DNA binding	0.00144575	0.64
molecular_function	GO:0090482	vitamin transmembrane transporter activity	0.00154453	0.64
cellular_component	GO:0000172	ribonuclease MRP complex	0.00221263	0.64
cellular_component	GO:0098835	presynaptic endocytic zone membrane	0.00221263	0.64
molecular_function	GO:0048156	tau protein binding	0.00163024	0.65
molecular_function	GO:0030674	protein-macromolecule adaptor activity	0.00172135	0.65
cellular_component	GO:0099513	polymeric cytoskeletal fiber	0.00248265	0.65
cellular_component	GO:0015629	actin cytoskeleton	0.00250771	0.65
biological_process	GO:0016572	histone phosphorylation	0.000304547	0.67
biological_process	GO:1905898	positive regulation of response to endoplasmic reticulum stress	0.000304547	0.67
biological_process	GO:2001234	negative regulation of apoptotic signaling pathway	0.00030827	0.67
biological_process	GO:0042330	taxis	0.000313829	0.67
biological_process	GO:0046890	regulation of lipid biosynthetic process	0.000317133	0.68
biological_process	GO:2001022	positive regulation of response to DNA damage stimulus	0.000325977	0.68
biological_process	GO:0051254	positive regulation of RNA metabolic process	0.000327433	0.68
biological_process	GO:0001666	response to hypoxia	0.000336971	0.68
biological_process	GO:0043393	regulation of protein binding	0.000344675	0.68
biological_process	GO:0043624	cellular protein complex disassembly	0.000344675	0.68
biological_process	GO:0034350	regulation of glial cell apoptotic process	0.000346752	0.71
biological_process	GO:0051231	spindle elongation	0.000346752	0.71
biological_process	GO:0010498	proteasomal protein catabolic process	0.00034848	0.71
biological_process	GO:1901575	organic substance catabolic process	0.00035017	0.71
biological_process	GO:0002009	morphogenesis of an epithelium	0.000355964	0.71
biological_process	GO:0072358	cardiovascular system development	0.000359345	0.71
biological_process	GO:0051336	regulation of hydrolase activity	0.000359985	0.71
biological_process	GO:1902930	regulation of alcohol biosynthetic process	0.000364642	0.71
biological_process	GO:0000077	DNA damage checkpoint	0.000364697	0.71
biological_process	GO:0070482	response to oxygen levels	0.000369124	0.71
biological_process	GO:0043933	protein-containing complex subunit organization	0.000370158	0.71
biological_process	GO:0070423	nucleotide-binding oligomerization domain containing signaling pathway	0.000371143	0.71
biological_process	GO:0003158	endothelium development	0.000375549	0.71
biological_process	GO:0001568	blood vessel development	0.000384366	0.71
biological_process	GO:0001837	epithelial to mesenchymal transition	0.000389668	0.71
biological_process	GO:0009411	response to UV	0.000389668	0.71
biological_process	GO:0000302	response to reactive oxygen species	0.000394796	0.71
biological_process	GO:0034614	cellular response to reactive oxygen species	0.000405516	0.71
biological_process	GO:1900101	regulation of endoplasmic reticulum unfolded protein response	0.00040557	0.71
biological_process	GO:0031669	cellular response to nutrient levels	0.000411144	0.71
biological_process	GO:0042327	positive regulation of phosphorylation	0.00041545	0.71
biological_process	GO:0061564	axon development	0.000416248	0.71
biological_process	GO:0031113	regulation of microtubule polymerization	0.000419725	0.71
biological_process	GO:0042594	response to starvation	0.000423654	0.71
biological_process	GO:0007098	centrosome cycle	0.000424078	0.71
biological_process	GO:0019218	regulation of steroid metabolic process	0.000424078	0.71
biological_process	GO:0051384	response to glucocorticoid	0.000427349	0.71
biological_process	GO:0010717	regulation of epithelial to mesenchymal transition	0.000429314	0.71
biological_process	GO:0030900	forebrain development	0.000429815	0.71
biological_process	GO:0023052	signaling	0.000431515	0.71
biological_process	GO:1902680	positive regulation of RNA biosynthetic process	0.000445083	0.71
biological_process	GO:0034660	ncRNA metabolic process	0.000445549	0.71
biological_process	GO:0002274	myeloid leukocyte activation	0.000447299	0.71
biological_process	GO:0032147	activation of protein kinase activity	0.000453039	0.71
molecular_function	GO:0000774	adenyl-nucleotide exchange factor activity	0.00187881	0.71
cellular_component	GO:0033179	proton-transporting V-type ATPase, V0 domain	0.00272868	0.73
cellular_component	GO:0030135	coated vesicle	0.00273868	0.73
biological_process	GO:0097191	extrinsic apoptotic signaling pathway	0.000463757	0.74
biological_process	GO:0070059	intrinsic apoptotic signaling pathway in response to endoplasmic reticulum stress	0.000470213	0.74
molecular_function	GO:0050750	low-density lipoprotein particle receptor binding	0.00201793	0.75
cellular_component	GO:0000307	cyclin-dependent protein kinase holoenzyme complex	0.00278012	0.75
cellular_component	GO:0008021	synaptic vesicle	0.0028068	0.75
cellular_component	GO:0016604	nuclear body	0.00289018	0.75
cellular_component	GO:0030662	coated vesicle membrane	0.00301144	0.75
cellular_component	GO:0010008	endosome membrane	0.00305531	0.75
cellular_component	GO:0005774	vacuolar membrane	0.00306671	0.75
cellular_component	GO:0030684	preribosome	0.00311408	0.75
molecular_function	GO:0031072	heat shock protein binding	0.00202431	0.76
molecular_function	GO:0019838	growth factor binding	0.00225171	0.77
cellular_component	GO:0030686	90S preribosome	0.00336833	0.77
biological_process	GO:0031109	microtubule polymerization or depolymerization	0.000503499	0.79
cellular_component	GO:0099081	supramolecular polymer	0.00357284	0.79
biological_process	GO:0045893	positive regulation of transcription, DNA-templated	0.000527997	0.81
biological_process	GO:0051225	spindle assembly	0.000531314	0.81
biological_process	GO:1903034	regulation of response to wounding	0.000533696	0.81
biological_process	GO:0035872	nucleotide-binding domain, leucine rich repeat containing receptor signaling pathway	0.000534909	0.81
biological_process	GO:1903508	positive regulation of nucleic acid-templated transcription	0.00053895	0.81
biological_process	GO:0051781	positive regulation of cell division	0.000546409	0.81
molecular_function	GO:0005161	platelet-derived growth factor receptor binding	0.00233326	0.81
biological_process	GO:0010616	negative regulation of cardiac muscle adaptation	0.000553703	0.82
biological_process	GO:1903243	negative regulation of cardiac muscle hypertrophy in response to stress	0.000553703	0.82
biological_process	GO:0005996	monosaccharide metabolic process	0.000558708	0.82
biological_process	GO:2001237	negative regulation of extrinsic apoptotic signaling pathway	0.000559516	0.82
biological_process	GO:0007265	Ras protein signal transduction	0.000560824	0.82
biological_process	GO:0048260	positive regulation of receptor-mediated endocytosis	0.000561197	0.82
biological_process	GO:0070555	response to interleukin-1	0.000564308	0.82
biological_process	GO:0042119	neutrophil activation	0.000570228	0.82
biological_process	GO:0006629	lipid metabolic process	0.000575852	0.82
biological_process	GO:0030193	regulation of blood coagulation	0.000579679	0.82
biological_process	GO:0014065	phosphatidylinositol 3-kinase signaling	0.000582107	0.82
biological_process	GO:0006353	DNA-templated transcription, termination	0.000592364	0.82
biological_process	GO:0048468	cell development	0.000609837	0.82
biological_process	GO:0016192	vesicle-mediated transport	0.000612436	0.82
biological_process	GO:1901653	cellular response to peptide	0.000618874	0.82
biological_process	GO:0008610	lipid biosynthetic process	0.000625741	0.82
biological_process	GO:0000723	telomere maintenance	0.000628019	0.82
biological_process	GO:0031960	response to corticosteroid	0.000628019	0.82
biological_process	GO:0019216	regulation of lipid metabolic process	0.000640838	0.82
molecular_function	GO:0016627	oxidoreductase activity, acting on the CH-CH group of donors	0.0024059	0.82
molecular_function	GO:0004529	exodeoxyribonuclease activity	0.00266203	0.83
molecular_function	GO:0050660	flavin adenine dinucleotide binding	0.00288842	0.83
molecular_function	GO:0048029	monosaccharide binding	0.00294736	0.83
biological_process	GO:0060759	regulation of response to cytokine stimulus	0.00068229	0.84
biological_process	GO:0030163	protein catabolic process	0.000691838	0.84
biological_process	GO:0006006	glucose metabolic process	0.000693275	0.84
biological_process	GO:1901605	alpha-amino acid metabolic process	0.000693275	0.84
biological_process	GO:0048661	positive regulation of smooth muscle cell proliferation	0.00070925	0.84
biological_process	GO:1900046	regulation of hemostasis	0.000718881	0.84
biological_process	GO:0050878	regulation of body fluid levels	0.000720134	0.84
biological_process	GO:0071229	cellular response to acid chemical	0.000724048	0.84
biological_process	GO:0043086	negative regulation of catalytic activity	0.000753778	0.84
biological_process	GO:0006364	rRNA processing	0.000754292	0.84
biological_process	GO:2001020	regulation of response to DNA damage stimulus	0.000754292	0.84
biological_process	GO:0030182	neuron differentiation	0.000756164	0.84
molecular_function	GO:0004536	deoxyribonuclease activity	0.00302432	0.84
biological_process	GO:0031111	negative regulation of microtubule polymerization or depolymerization	0.000756495	0.85
cellular_component	GO:0005638	lamin filament	0.00362863	0.85
cellular_component	GO:0005663	DNA replication factor C complex	0.00362863	0.85
cellular_component	GO:0031261	DNA replication preinitiation complex	0.00362863	0.85
cellular_component	GO:0032133	chromosome passenger complex	0.00362863	0.85
cellular_component	GO:0045202	synapse	0.00363234	0.85
biological_process	GO:0036498	IRE1-mediated unfolded protein response	0.000773268	0.86
biological_process	GO:0046782	regulation of viral transcription	0.000773268	0.86
biological_process	GO:1901655	cellular response to ketone	0.000782563	0.86
biological_process	GO:0007584	response to nutrient	0.000783956	0.87
biological_process	GO:0032990	cell part morphogenesis	0.000791829	0.87
biological_process	GO:0007411	axon guidance	0.000795127	0.87
biological_process	GO:0007173	epidermal growth factor receptor signaling pathway	0.0007985	0.87
molecular_function	GO:0044877	protein-containing complex binding	0.00323844	0.87
molecular_function	GO:0042803	protein homodimerization activity	0.00341341	0.88
molecular_function	GO:0060090	molecular adaptor activity	0.0035297	0.88
molecular_function	GO:0050661	NADP binding	0.00370727	0.88
molecular_function	GO:0016787	hydrolase activity	0.00374883	0.88
molecular_function	GO:0016628	oxidoreductase activity, acting on the CH-CH group of donors, NAD or NADP as acceptor	0.00386058	0.88
molecular_function	GO:0070325	lipoprotein particle receptor binding	0.00386058	0.88
cellular_component	GO:0000784	nuclear chromosome, telomeric region	0.00413755	0.88
cellular_component	GO:0016234	inclusion body	0.00414113	0.88
cellular_component	GO:0099080	supramolecular complex	0.00414766	0.88
cellular_component	GO:0005905	clathrin-coated pit	0.00428303	0.88
cellular_component	GO:0070160	tight junction	0.00432684	0.88
cellular_component	GO:0071013	catalytic step 2 spliceosome	0.00453028	0.88
cellular_component	GO:0030688	preribosome, small subunit precursor	0.00464399	0.89
cellular_component	GO:0034774	secretory granule lumen	0.00486682	0.89
biological_process	GO:0072126	positive regulation of glomerular mesangial cell proliferation	0.000807139	0.9
biological_process	GO:0003093	regulation of glomerular filtration	0.000810232	0.92
biological_process	GO:0006694	steroid biosynthetic process	0.000814074	0.92
biological_process	GO:0070987	error-free translesion synthesis	0.000829907	0.93
biological_process	GO:0009069	serine family amino acid metabolic process	0.000837395	0.93
biological_process	GO:1903053	regulation of extracellular matrix organization	0.000837395	0.93
biological_process	GO:2001236	regulation of extrinsic apoptotic signaling pathway	0.000842042	0.93
biological_process	GO:1901988	negative regulation of cell cycle phase transition	0.000844187	0.93
biological_process	GO:0042542	response to hydrogen peroxide	0.000844554	0.93
biological_process	GO:0007165	signal transduction	0.000848371	0.93
molecular_function	GO:0030957	Tat protein binding	0.00397084	0.93
biological_process	GO:2000027	regulation of animal organ morphogenesis	0.000872455	0.94
biological_process	GO:0048858	cell projection morphogenesis	0.000872676	0.94
biological_process	GO:0014066	regulation of phosphatidylinositol 3-kinase signaling	0.000881591	0.94
biological_process	GO:0030335	positive regulation of cell migration	0.000882014	0.94
biological_process	GO:0097485	neuron projection guidance	0.00088244	0.94
biological_process	GO:0007076	mitotic chromosome condensation	0.000897778	0.94
biological_process	GO:0045807	positive regulation of endocytosis	0.000899221	0.94
biological_process	GO:0042770	signal transduction in response to DNA damage	0.000900394	0.94
biological_process	GO:0036230	granulocyte activation	0.000904711	0.94
biological_process	GO:0002446	neutrophil mediated immunity	0.000906673	0.94
molecular_function	GO:0016614	oxidoreductase activity, acting on CH-OH group of donors	0.00403639	0.94
molecular_function	GO:0045296	cadherin binding	0.00408752	0.94
cellular_component	GO:0000799	nuclear condensin complex	0.00493625	0.94
cellular_component	GO:0000811	GINS complex	0.00493625	0.94
cellular_component	GO:0035866	alphav-beta3 integrin-PKCalpha complex	0.00493625	0.94
cellular_component	GO:0044307	dendritic branch	0.00493625	0.94
cellular_component	GO:0071062	alphav-beta3 integrin-vitronectin complex	0.00493625	0.94
cellular_component	GO:0097134	cyclin E1-CDK2 complex	0.00493625	0.94
cellular_component	GO:0031298	replication fork protection complex	0.00507192	0.94
cellular_component	GO:1990316	Atg1/ULK1 kinase complex	0.00507192	0.94
cellular_component	GO:0000315	organellar large ribosomal subunit	0.00513267	0.94
cellular_component	GO:0005762	mitochondrial large ribosomal subunit	0.00513267	0.94
cellular_component	GO:0031983	vesicle lumen	0.00522883	0.94
cellular_component	GO:1990234	transferase complex	0.00527612	0.94
cellular_component	GO:0099512	supramolecular fiber	0.00544075	0.94
cellular_component	GO:0044798	nuclear transcription factor complex	0.00563402	0.94
cellular_component	GO:0005765	lysosomal membrane	0.00582707	0.95
cellular_component	GO:0030119	AP-type membrane coat adaptor complex	0.00586514	0.95
cellular_component	GO:0098852	lytic vacuole membrane	0.00627132	0.95
cellular_component	GO:0031301	integral component of organelle membrane	0.00633541	0.95
cellular_component	GO:0060205	cytoplasmic vesicle lumen	0.00664177	0.95
cellular_component	GO:0030133	transport vesicle	0.00667396	0.95
cellular_component	GO:0000792	heterochromatin	0.00678658	0.95
molecular_function	GO:0008296	3'-5'-exodeoxyribonuclease activity	0.00413731	0.96
molecular_function	GO:0031434	mitogen-activated protein kinase kinase binding	0.00413731	0.96
molecular_function	GO:0051879	Hsp90 protein binding	0.00429937	0.96
molecular_function	GO:0140096	catalytic activity, acting on a protein	0.00430649	0.96
molecular_function	GO:0016895	exodeoxyribonuclease activity, producing 5'-phosphomonoesters	0.00459409	0.96
cellular_component	GO:0031258	lamellipodium membrane	0.00706209	0.96
cellular_component	GO:0000778	condensed nuclear chromosome kinetochore	0.0074392	0.96
cellular_component	GO:0030122	AP-2 adaptor complex	0.0074392	0.96
biological_process	GO:0006145	purine nucleobase catabolic process	0.000906722	0.97
biological_process	GO:0019322	pentose biosynthetic process	0.000906722	0.97
biological_process	GO:0034436	glycoprotein transport	0.000906722	0.97
biological_process	GO:1902292	cell cycle DNA replication initiation	0.000906722	0.97
biological_process	GO:1902315	nuclear cell cycle DNA replication initiation	0.000906722	0.97
biological_process	GO:1902975	mitotic DNA replication initiation	0.000906722	0.97
molecular_function	GO:0005007	fibroblast growth factor-activated receptor activity	0.00476119	0.97
molecular_function	GO:0031493	nucleosomal histone binding	0.00476119	0.97
molecular_function	GO:0003677	DNA binding	0.00493675	0.97
molecular_function	GO:0004713	protein tyrosine kinase activity	0.00500773	0.97
molecular_function	GO:0003724	RNA helicase activity	0.00516705	0.97
molecular_function	GO:0001618	virus receptor activity	0.00533234	0.97
molecular_function	GO:0140272	exogenous protein binding	0.00533234	0.97
molecular_function	GO:0003887	DNA-directed DNA polymerase activity	0.00545287	0.97
molecular_function	GO:0022804	active transmembrane transporter activity	0.00549216	0.97
molecular_function	GO:0030544	Hsp70 protein binding	0.0055765	0.97
cellular_component	GO:0044304	main axon	0.00793026	0.97
biological_process	GO:0006268	DNA unwinding involved in DNA replication	0.000907244	0.98
biological_process	GO:0043558	regulation of translational initiation in response to stress	0.000907244	0.98
biological_process	GO:0016072	rRNA metabolic process	0.000913358	0.98
biological_process	GO:0045321	leukocyte activation	0.000913635	0.98
biological_process	GO:2000026	regulation of multicellular organismal development	0.000918521	0.98
biological_process	GO:0007568	aging	0.000928933	0.98
biological_process	GO:2001252	positive regulation of chromosome organization	0.000935493	0.98
biological_process	GO:0007094	mitotic spindle assembly checkpoint	0.000938563	0.98
biological_process	GO:0031577	spindle checkpoint	0.000938563	0.98
biological_process	GO:0070670	response to interleukin-4	0.000938563	0.98
biological_process	GO:0071173	spindle assembly checkpoint	0.000938563	0.98
biological_process	GO:0071174	mitotic spindle checkpoint	0.000938563	0.98
biological_process	GO:0021537	telencephalon development	0.00094761	0.98
biological_process	GO:0042254	ribosome biogenesis	0.000950871	0.98
biological_process	GO:0017144	drug metabolic process	0.000964235	0.98
biological_process	GO:0045840	positive regulation of mitotic nuclear division	0.000970667	0.98
biological_process	GO:0060322	head development	0.00098064	0.98
biological_process	GO:0030177	positive regulation of Wnt signaling pathway	0.000985915	0.98
biological_process	GO:0071347	cellular response to interleukin-1	0.000985915	0.98
biological_process	GO:0006081	cellular aldehyde metabolic process	0.000987119	0.98
biological_process	GO:2001244	positive regulation of intrinsic apoptotic signaling pathway	0.000987119	0.98
biological_process	GO:1903035	negative regulation of response to wounding	0.000994358	0.98
biological_process	GO:0034612	response to tumor necrosis factor	0.000995111	0.98
biological_process	GO:1901654	response to ketone	0.00100023	0.98
biological_process	GO:0051983	regulation of chromosome segregation	0.00101942	0.98
biological_process	GO:0070542	response to fatty acid	0.00104123	0.98
biological_process	GO:0031099	regeneration	0.00104382	0.98
biological_process	GO:0006084	acetyl-CoA metabolic process	0.00105124	0.98
biological_process	GO:0019221	cytokine-mediated signaling pathway	0.0010575	0.98
biological_process	GO:0034644	cellular response to UV	0.00108666	0.98
biological_process	GO:0002444	myeloid leukocyte mediated immunity	0.001088	0.98
biological_process	GO:0032984	protein-containing complex disassembly	0.00112173	0.98
biological_process	GO:1905330	regulation of morphogenesis of an epithelium	0.00112196	0.98
biological_process	GO:0008033	tRNA processing	0.00112773	0.98
biological_process	GO:0010827	regulation of glucose transmembrane transport	0.00112972	0.98
biological_process	GO:0031016	pancreas development	0.00112972	0.98
biological_process	GO:0006284	base-excision repair	0.00113709	0.98
biological_process	GO:0009110	vitamin biosynthetic process	0.00114671	0.98
biological_process	GO:0033081	regulation of T cell differentiation in thymus	0.00114671	0.98
biological_process	GO:0033119	negative regulation of RNA splicing	0.00114671	0.98
biological_process	GO:0042180	cellular ketone metabolic process	0.0011473	0.98
biological_process	GO:0030155	regulation of cell adhesion	0.00116028	0.98
biological_process	GO:0008284	positive regulation of cell population proliferation	0.00116537	0.98
biological_process	GO:0048869	cellular developmental process	0.00119389	0.98
biological_process	GO:0030111	regulation of Wnt signaling pathway	0.00120148	0.98
biological_process	GO:0048584	positive regulation of response to stimulus	0.00120593	0.98
biological_process	GO:0006631	fatty acid metabolic process	0.00122637	0.98
biological_process	GO:0046907	intracellular transport	0.00122858	0.98
biological_process	GO:0048666	neuron development	0.00122906	0.98
biological_process	GO:0019748	secondary metabolic process	0.00123211	0.98
biological_process	GO:0010718	positive regulation of epithelial to mesenchymal transition	0.00123704	0.98
biological_process	GO:0007409	axonogenesis	0.00124451	0.98
biological_process	GO:0002753	cytoplasmic pattern recognition receptor signaling pathway	0.00125188	0.98
biological_process	GO:0030855	epithelial cell differentiation	0.00125574	0.98
biological_process	GO:0016236	macroautophagy	0.00125639	0.98
biological_process	GO:0055081	anion homeostasis	0.00126102	0.98
biological_process	GO:0014068	positive regulation of phosphatidylinositol 3-kinase signaling	0.0012639	0.98
cellular_component	GO:0051233	spindle midzone	0.00796614	0.98
cellular_component	GO:0030666	endocytic vesicle membrane	0.00827767	0.98
cellular_component	GO:0035579	specific granule membrane	0.00843082	0.98
cellular_component	GO:0098978	glutamatergic synapse	0.00854913	0.98
cellular_component	GO:0005782	peroxisomal matrix	0.00864804	0.98
cellular_component	GO:0031907	microbody lumen	0.00864804	0.98
cellular_component	GO:0005814	centriole	0.00935432	0.98
cellular_component	GO:0044300	cerebellar mossy fiber	0.00941383	0.98
cellular_component	GO:1905347	endodeoxyribonuclease complex	0.00941383	0.98
cellular_component	GO:0019867	outer membrane	0.00956818	0.98
cellular_component	GO:0000808	origin recognition complex	0.00981763	0.98
cellular_component	GO:0005664	nuclear origin of replication recognition complex	0.00981763	0.98
cellular_component	GO:0036056	filtration diaphragm	0.00981763	0.98
cellular_component	GO:0036057	slit diaphragm	0.00981763	0.98
cellular_component	GO:0005902	microvillus	0.0100572	0.98
cellular_component	GO:0042581	specific granule	0.0110761	0.98
cellular_component	GO:0030128	clathrin coat of endocytic vesicle	0.0113055	0.98
cellular_component	GO:0005681	spliceosomal complex	0.0114368	0.98
cellular_component	GO:0005635	nuclear envelope	0.0119607	0.98
cellular_component	GO:0035869	ciliary transition zone	0.0120863	0.98
cellular_component	GO:0031968	organelle outer membrane	0.0125853	0.98
cellular_component	GO:0005721	pericentric heterochromatin	0.0127573	0.98
cellular_component	GO:0030132	clathrin coat of coated pit	0.0127573	0.98
cellular_component	GO:0035371	microtubule plus-end	0.0127573	0.98
cellular_component	GO:0043194	axon initial segment	0.0127573	0.98
cellular_component	GO:0030139	endocytic vesicle	0.0127698	0.98
cellular_component	GO:0031300	intrinsic component of organelle membrane	0.012815	0.98
biological_process	GO:0016055	Wnt signaling pathway	0.00129718	0.99
biological_process	GO:0009267	cellular response to starvation	0.00130175	0.99
biological_process	GO:0120039	plasma membrane bounded cell projection morphogenesis	0.0013049	0.99
biological_process	GO:0033673	negative regulation of kinase activity	0.00133516	0.99
biological_process	GO:0034329	cell junction assembly	0.00135064	0.99
biological_process	GO:0043161	proteasome-mediated ubiquitin-dependent protein catabolic process	0.00135362	0.99
biological_process	GO:0030154	cell differentiation	0.00135907	0.99
biological_process	GO:0001959	regulation of cytokine-mediated signaling pathway	0.00138135	0.99
biological_process	GO:0000022	mitotic spindle elongation	0.00141612	0.99
biological_process	GO:0030638	polyketide metabolic process	0.00141612	0.99
biological_process	GO:0044597	daunorubicin metabolic process	0.00141612	0.99
biological_process	GO:0044598	doxorubicin metabolic process	0.00141612	0.99
biological_process	GO:0070424	regulation of nucleotide-binding oligomerization domain containing signaling pathway	0.00141612	0.99
biological_process	GO:0071383	cellular response to steroid hormone stimulus	0.00141981	0.99
biological_process	GO:1901991	negative regulation of mitotic cell cycle phase transition	0.00141981	0.99
biological_process	GO:0034698	response to gonadotropin	0.00142186	0.99
biological_process	GO:0043312	neutrophil degranulation	0.0014339	0.99
biological_process	GO:0071375	cellular response to peptide hormone stimulus	0.0014645	0.99
biological_process	GO:0045446	endothelial cell differentiation	0.0014906	0.99
biological_process	GO:0198738	cell-cell signaling by wnt	0.00149557	0.99
biological_process	GO:0043555	regulation of translation in response to stress	0.00152016	0.99
biological_process	GO:0009791	post-embryonic development	0.00152655	0.99
biological_process	GO:2001239	regulation of extrinsic apoptotic signaling pathway in absence of ligand	0.00157727	0.99
biological_process	GO:0051656	establishment of organelle localization	0.00158318	0.99
biological_process	GO:0031175	neuron projection development	0.00159114	0.99
biological_process	GO:0061077	chaperone-mediated protein folding	0.00160079	0.99
biological_process	GO:0043154	negative regulation of cysteine-type endopeptidase activity involved in apoptotic process	0.00160708	0.99
biological_process	GO:0050818	regulation of coagulation	0.00160708	0.99
biological_process	GO:0050789	regulation of biological process	0.00160977	0.99
biological_process	GO:0044773	mitotic DNA damage checkpoint	0.00163215	0.99
biological_process	GO:0006469	negative regulation of protein kinase activity	0.00163847	0.99
biological_process	GO:0071353	cellular response to interleukin-4	0.00164475	0.99
cellular_component	GO:0043601	nuclear replisome	0.0134571	0.99
cellular_component	GO:0098803	respiratory chain complex	0.0134847	0.99
cellular_component	GO:0030672	synaptic vesicle membrane	0.013874	0.99
cellular_component	GO:0099501	exocytic vesicle membrane	0.013874	0.99
biological_process	GO:0070493	thrombin-activated receptor signaling pathway	0.00165316	1
biological_process	GO:1901989	positive regulation of cell cycle phase transition	0.00170462	1
biological_process	GO:0055088	lipid homeostasis	0.00171561	1
biological_process	GO:0007267	cell-cell signaling	0.00171819	1
biological_process	GO:0051156	glucose 6-phosphate metabolic process	0.00172904	1
biological_process	GO:0036473	cell death in response to oxidative stress	0.00173224	1
biological_process	GO:1901264	carbohydrate derivative transport	0.00176458	1
biological_process	GO:0031023	microtubule organizing center organization	0.00176559	1
biological_process	GO:0021700	developmental maturation	0.00177237	1
biological_process	GO:0002283	neutrophil activation involved in immune response	0.00178343	1
biological_process	GO:0002275	myeloid cell activation involved in immune response	0.00179763	1
biological_process	GO:0006520	cellular amino acid metabolic process	0.00181064	1
biological_process	GO:0009112	nucleobase metabolic process	0.00181444	1
biological_process	GO:0045740	positive regulation of DNA replication	0.00181444	1
biological_process	GO:0045841	negative regulation of mitotic metaphase/anaphase transition	0.00181444	1
biological_process	GO:0043299	leukocyte degranulation	0.00182123	1
biological_process	GO:0009314	response to radiation	0.00183517	1
biological_process	GO:0000281	mitotic cytokinesis	0.00183856	1
biological_process	GO:0038034	signal transduction in absence of ligand	0.00183856	1
biological_process	GO:0097192	extrinsic apoptotic signaling pathway in absence of ligand	0.00183856	1
biological_process	GO:0050801	ion homeostasis	0.00184487	1
biological_process	GO:0002262	myeloid cell homeostasis	0.00185597	1
biological_process	GO:0022612	gland morphogenesis	0.0019008	1
biological_process	GO:0033627	cell adhesion mediated by integrin	0.00190675	1
biological_process	GO:0033866	nucleoside bisphosphate biosynthetic process	0.00190675	1
biological_process	GO:0034030	ribonucleoside bisphosphate biosynthetic process	0.00190675	1
biological_process	GO:0034033	purine nucleoside bisphosphate biosynthetic process	0.00190675	1
biological_process	GO:0060341	regulation of cellular localization	0.00191997	1
biological_process	GO:0032200	telomere organization	0.00192458	1
biological_process	GO:0048598	embryonic morphogenesis	0.00193357	1
biological_process	GO:1905114	cell surface receptor signaling pathway involved in cell-cell signaling	0.00193961	1
biological_process	GO:2001243	negative regulation of intrinsic apoptotic signaling pathway	0.00194019	1
biological_process	GO:0048812	neuron projection morphogenesis	0.00196886	1
biological_process	GO:0040008	regulation of growth	0.00196968	1
biological_process	GO:0071695	anatomical structure maturation	0.00198024	1
biological_process	GO:0048511	rhythmic process	0.00199367	1
biological_process	GO:0044344	cellular response to fibroblast growth factor stimulus	0.00200748	1
biological_process	GO:0030330	DNA damage response, signal transduction by p53 class mediator	0.00200787	1
biological_process	GO:0051306	mitotic sister chromatid separation	0.00201521	1
biological_process	GO:1902808	positive regulation of cell cycle G1/S phase transition	0.00201521	1
biological_process	GO:0032355	response to estradiol	0.00203857	1
biological_process	GO:0031145	anaphase-promoting complex-dependent catabolic process	0.00204425	1
biological_process	GO:0070229	negative regulation of lymphocyte apoptotic process	0.00204615	1
biological_process	GO:0048488	synaptic vesicle endocytosis	0.00204875	1
biological_process	GO:0140238	presynaptic endocytosis	0.00204875	1
biological_process	GO:0006301	postreplication repair	0.00206292	1
biological_process	GO:0032330	regulation of chondrocyte differentiation	0.00206292	1
biological_process	GO:0016241	regulation of macroautophagy	0.00208853	1
biological_process	GO:0016032	viral process	0.00209309	1
biological_process	GO:0034330	cell junction organization	0.00215741	1
biological_process	GO:0071356	cellular response to tumor necrosis factor	0.0021647	1
biological_process	GO:0045732	positive regulation of protein catabolic process	0.00223066	1
biological_process	GO:0070301	cellular response to hydrogen peroxide	0.00229686	1
biological_process	GO:0019637	organophosphate metabolic process	0.00230109	1
biological_process	GO:0042058	regulation of epidermal growth factor receptor signaling pathway	0.00232835	1
biological_process	GO:0051052	regulation of DNA metabolic process	0.00233255	1
biological_process	GO:0030010	establishment of cell polarity	0.00234731	1
biological_process	GO:0036465	synaptic vesicle recycling	0.00234778	1
biological_process	GO:0031344	regulation of cell projection organization	0.00235394	1
biological_process	GO:0071156	regulation of cell cycle arrest	0.00235639	1
biological_process	GO:0030100	regulation of endocytosis	0.00236135	1
biological_process	GO:0006310	DNA recombination	0.00237348	1
biological_process	GO:0000820	regulation of glutamine family amino acid metabolic process	0.00241879	1
biological_process	GO:0032287	peripheral nervous system myelin maintenance	0.00241879	1
biological_process	GO:0044806	G-quadruplex DNA unwinding	0.00241879	1
biological_process	GO:0045590	negative regulation of regulatory T cell differentiation	0.00241879	1
biological_process	GO:0060717	chorion development	0.00241879	1
biological_process	GO:0007163	establishment or maintenance of cell polarity	0.00242482	1
biological_process	GO:0051092	positive regulation of NF-kappaB transcription factor activity	0.00242702	1
biological_process	GO:0032768	regulation of monooxygenase activity	0.00243766	1
biological_process	GO:0046653	tetrahydrofolate metabolic process	0.00244632	1
biological_process	GO:0048025	negative regulation of mRNA splicing, via spliceosome	0.00244632	1
biological_process	GO:0048469	cell maturation	0.00245435	1
biological_process	GO:1902100	negative regulation of metaphase/anaphase transition of cell cycle	0.0024584	1
biological_process	GO:0051402	neuron apoptotic process	0.00248515	1
biological_process	GO:0010803	regulation of tumor necrosis factor-mediated signaling pathway	0.00251672	1
biological_process	GO:0071384	cellular response to corticosteroid stimulus	0.00251672	1
biological_process	GO:0006415	translational termination	0.00252737	1
biological_process	GO:0031954	positive regulation of protein autophosphorylation	0.00253145	1
biological_process	GO:0048762	mesenchymal cell differentiation	0.00254358	1
biological_process	GO:0043525	positive regulation of neuron apoptotic process	0.00258076	1
biological_process	GO:0071398	cellular response to fatty acid	0.00258076	1
biological_process	GO:0046364	monosaccharide biosynthetic process	0.00261401	1
biological_process	GO:0030195	negative regulation of blood coagulation	0.00262465	1
biological_process	GO:0016070	RNA metabolic process	0.00265419	1
biological_process	GO:0035239	tube morphogenesis	0.00270153	1
biological_process	GO:0048568	embryonic organ development	0.00270215	1
biological_process	GO:0048589	developmental growth	0.00270499	1
biological_process	GO:0050731	positive regulation of peptidyl-tyrosine phosphorylation	0.0027116	1
biological_process	GO:0043491	protein kinase B signaling	0.00271315	1
biological_process	GO:0071407	cellular response to organic cyclic compound	0.00272161	1
biological_process	GO:0032869	cellular response to insulin stimulus	0.00276544	1
biological_process	GO:0010817	regulation of hormone levels	0.00278482	1
biological_process	GO:0072593	reactive oxygen species metabolic process	0.00279793	1
biological_process	GO:0001977	renal system process involved in regulation of blood volume	0.00279883	1
biological_process	GO:0022038	corpus callosum development	0.00279883	1
biological_process	GO:0071732	cellular response to nitric oxide	0.00279883	1
biological_process	GO:0033077	T cell differentiation in thymus	0.00287203	1
biological_process	GO:0035066	positive regulation of histone acetylation	0.00287773	1
biological_process	GO:0044818	mitotic G2/M transition checkpoint	0.00287773	1
biological_process	GO:0071549	cellular response to dexamethasone stimulus	0.00287773	1
biological_process	GO:0043410	positive regulation of MAPK cascade	0.00287907	1
biological_process	GO:0022603	regulation of anatomical structure morphogenesis	0.00290158	1
biological_process	GO:0009636	response to toxic substance	0.00295084	1
biological_process	GO:1902750	negative regulation of cell cycle G2/M phase transition	0.00296161	1
biological_process	GO:0002062	chondrocyte differentiation	0.0029627	1
biological_process	GO:0007420	brain development	0.00298855	1
biological_process	GO:0009108	coenzyme biosynthetic process	0.00299909	1
biological_process	GO:0007084	mitotic nuclear envelope reassembly	0.00302018	1
biological_process	GO:0030647	aminoglycoside antibiotic metabolic process	0.00302018	1
biological_process	GO:0033314	mitotic DNA replication checkpoint	0.00302018	1
biological_process	GO:0035999	tetrahydrofolate interconversion	0.00302018	1
biological_process	GO:0051255	spindle midzone assembly	0.00302018	1
biological_process	GO:0072124	regulation of glomerular mesangial cell proliferation	0.00302018	1
biological_process	GO:1903265	positive regulation of tumor necrosis factor-mediated signaling pathway	0.00302018	1
biological_process	GO:0007171	activation of transmembrane receptor protein tyrosine kinase activity	0.00304681	1
biological_process	GO:0038065	collagen-activated signaling pathway	0.00304681	1
biological_process	GO:1904925	positive regulation of autophagy of mitochondrion in response to mitochondrial depolarization	0.00304681	1
biological_process	GO:0051348	negative regulation of transferase activity	0.00306384	1
biological_process	GO:2000117	negative regulation of cysteine-type endopeptidase activity	0.00309906	1
biological_process	GO:1905818	regulation of chromosome separation	0.00311903	1
biological_process	GO:0043409	negative regulation of MAPK cascade	0.00320476	1
biological_process	GO:0071385	cellular response to glucocorticoid stimulus	0.00322372	1
biological_process	GO:0046394	carboxylic acid biosynthetic process	0.0032316	1
biological_process	GO:0016051	carbohydrate biosynthetic process	0.00326988	1
biological_process	GO:0007091	metaphase/anaphase transition of mitotic cell cycle	0.00330847	1
biological_process	GO:0051353	positive regulation of oxidoreductase activity	0.00330847	1
biological_process	GO:1900047	negative regulation of hemostasis	0.00330847	1
biological_process	GO:0034103	regulation of tissue remodeling	0.00330855	1
biological_process	GO:0055085	transmembrane transport	0.00333216	1
biological_process	GO:0071236	cellular response to antibiotic	0.00341189	1
biological_process	GO:0000041	transition metal ion transport	0.00341437	1
biological_process	GO:0001736	establishment of planar polarity	0.00341437	1
biological_process	GO:0007164	establishment of tissue polarity	0.00341437	1
biological_process	GO:0051272	positive regulation of cellular component movement	0.00347013	1
biological_process	GO:0010565	regulation of cellular ketone metabolic process	0.00348454	1
biological_process	GO:0032989	cellular component morphogenesis	0.00349619	1
biological_process	GO:0043687	post-translational protein modification	0.00349729	1
biological_process	GO:0016053	organic acid biosynthetic process	0.00349884	1
biological_process	GO:1905897	regulation of response to endoplasmic reticulum stress	0.00352657	1
biological_process	GO:0009057	macromolecule catabolic process	0.00357987	1
biological_process	GO:1901184	regulation of ERBB signaling pathway	0.00365821	1
biological_process	GO:0051298	centrosome duplication	0.00366773	1
biological_process	GO:2000573	positive regulation of DNA biosynthetic process	0.00366773	1
biological_process	GO:1903530	regulation of secretion by cell	0.00372854	1
biological_process	GO:0033045	regulation of sister chromatid segregation	0.00375205	1
biological_process	GO:0034755	iron ion transmembrane transport	0.00376885	1
biological_process	GO:0061162	establishment of monopolar cell polarity	0.00376885	1
biological_process	GO:0033044	regulation of chromosome organization	0.00378796	1
biological_process	GO:0000724	double-strand break repair via homologous recombination	0.00382415	1
biological_process	GO:0061041	regulation of wound healing	0.00387236	1
biological_process	GO:0098771	inorganic ion homeostasis	0.00387394	1
biological_process	GO:0045338	farnesyl diphosphate metabolic process	0.00390465	1
biological_process	GO:0046104	thymidine metabolic process	0.00390465	1
biological_process	GO:0046125	pyrimidine deoxyribonucleoside metabolic process	0.00390465	1
biological_process	GO:0060718	chorionic trophoblast cell differentiation	0.00390465	1
biological_process	GO:1902339	positive regulation of apoptotic process involved in morphogenesis	0.00390465	1
biological_process	GO:0061045	negative regulation of wound healing	0.00398344	1
biological_process	GO:0051341	regulation of oxidoreductase activity	0.0040227	1
biological_process	GO:0043523	regulation of neuron apoptotic process	0.00403109	1
biological_process	GO:0055086	nucleobase-containing small molecule metabolic process	0.00404287	1
biological_process	GO:0050678	regulation of epithelial cell proliferation	0.00405787	1
biological_process	GO:0019318	hexose metabolic process	0.00406106	1
biological_process	GO:0000904	cell morphogenesis involved in differentiation	0.00408588	1
biological_process	GO:0070997	neuron death	0.00409996	1
biological_process	GO:0071560	cellular response to transforming growth factor beta stimulus	0.00410713	1
biological_process	GO:0061098	positive regulation of protein tyrosine kinase activity	0.0041337	1
biological_process	GO:0001893	maternal placenta development	0.00418942	1
biological_process	GO:0030071	regulation of mitotic metaphase/anaphase transition	0.00424631	1
biological_process	GO:0050999	regulation of nitric-oxide synthase activity	0.00424631	1
biological_process	GO:0097366	response to bronchodilator	0.00424631	1
biological_process	GO:2000816	negative regulation of mitotic sister chromatid separation	0.00431083	1
biological_process	GO:0031952	regulation of protein autophosphorylation	0.00432227	1
biological_process	GO:2000147	positive regulation of cell motility	0.00433635	1
biological_process	GO:0071364	cellular response to epidermal growth factor stimulus	0.00434893	1
biological_process	GO:0060560	developmental growth involved in morphogenesis	0.00436054	1
biological_process	GO:0000725	recombinational repair	0.00436119	1
biological_process	GO:0120035	regulation of plasma membrane bounded cell projection organization	0.00436465	1
biological_process	GO:0090407	organophosphate biosynthetic process	0.00436735	1
biological_process	GO:0044403	symbiotic process	0.00437763	1
biological_process	GO:0050679	positive regulation of epithelial cell proliferation	0.00438477	1
biological_process	GO:1990778	protein localization to cell periphery	0.00443432	1
biological_process	GO:0006928	movement of cell or subcellular component	0.00443899	1
biological_process	GO:0099111	microtubule-based transport	0.00447249	1
biological_process	GO:0009070	serine family amino acid biosynthetic process	0.00448865	1
biological_process	GO:0002092	positive regulation of receptor internalization	0.00450729	1
biological_process	GO:0009309	amine biosynthetic process	0.00450729	1
biological_process	GO:0043112	receptor metabolic process	0.00457757	1
biological_process	GO:0032102	negative regulation of response to external stimulus	0.004632	1
biological_process	GO:0051188	cofactor biosynthetic process	0.00474047	1
biological_process	GO:1903320	regulation of protein modification by small protein conjugation or removal	0.00474047	1
biological_process	GO:0051701	interaction with host	0.00477005	1
biological_process	GO:0071216	cellular response to biotic stimulus	0.00479762	1
biological_process	GO:0032496	response to lipopolysaccharide	0.00481037	1
biological_process	GO:0090092	regulation of transmembrane receptor protein serine/threonine kinase signaling pathway	0.00485041	1
biological_process	GO:0002064	epithelial cell development	0.00485768	1
biological_process	GO:0034101	erythrocyte homeostasis	0.0048734	1
biological_process	GO:1903844	regulation of cellular response to transforming growth factor beta stimulus	0.0048734	1
biological_process	GO:0033365	protein localization to organelle	0.0049027	1
biological_process	GO:0051784	negative regulation of nuclear division	0.00491189	1
biological_process	GO:0071774	response to fibroblast growth factor	0.00495374	1
biological_process	GO:0002263	cell activation involved in immune response	0.0049702	1
biological_process	GO:1901699	cellular response to nitrogen compound	0.00503424	1
biological_process	GO:1901800	positive regulation of proteasomal protein catabolic process	0.00503741	1
biological_process	GO:0072401	signal transduction involved in DNA integrity checkpoint	0.00506757	1
biological_process	GO:0072422	signal transduction involved in DNA damage checkpoint	0.00506757	1
biological_process	GO:0044706	multi-multicellular organism process	0.00508775	1
biological_process	GO:0044784	metaphase/anaphase transition of cell cycle	0.00512131	1
biological_process	GO:0090307	mitotic spindle assembly	0.00512131	1
biological_process	GO:0031503	protein-containing complex localization	0.00513207	1
biological_process	GO:0051090	regulation of DNA-binding transcription factor activity	0.0051481	1
biological_process	GO:0001894	tissue homeostasis	0.00515398	1
biological_process	GO:0001738	morphogenesis of a polarized epithelium	0.00517868	1
biological_process	GO:0035791	platelet-derived growth factor receptor-beta signaling pathway	0.00518637	1
biological_process	GO:1900121	negative regulation of receptor binding	0.00518637	1
biological_process	GO:1904923	regulation of autophagy of mitochondrion in response to mitochondrial depolarization	0.00518637	1
biological_process	GO:0000821	regulation of arginine metabolic process	0.00522723	1
biological_process	GO:0006272	leading strand elongation	0.00522723	1
biological_process	GO:0010133	proline catabolic process to glutamate	0.00522723	1
biological_process	GO:0042819	vitamin B6 biosynthetic process	0.00522723	1
biological_process	GO:0042822	pyridoxal phosphate metabolic process	0.00522723	1
biological_process	GO:0043988	histone H3-S28 phosphorylation	0.00522723	1
biological_process	GO:0050689	negative regulation of defense response to virus by host	0.00522723	1
biological_process	GO:0061740	protein targeting to lysosome involved in chaperone-mediated autophagy	0.00522723	1
biological_process	GO:0071163	DNA replication preinitiation complex assembly	0.00522723	1
biological_process	GO:1902990	mitotic telomere maintenance via semi-conservative replication	0.00522723	1
biological_process	GO:0010821	regulation of mitochondrion organization	0.00529551	1
biological_process	GO:0045839	negative regulation of mitotic nuclear division	0.00530681	1
biological_process	GO:0002366	leukocyte activation involved in immune response	0.00530858	1
biological_process	GO:0007507	heart development	0.00532277	1
biological_process	GO:0051085	chaperone cofactor-dependent protein refolding	0.00535442	1
biological_process	GO:1901661	quinone metabolic process	0.00535442	1
biological_process	GO:0035272	exocrine system development	0.00545709	1
biological_process	GO:0046850	regulation of bone remodeling	0.00545709	1
biological_process	GO:0006348	chromatin silencing at telomere	0.00552727	1
biological_process	GO:0032075	positive regulation of nuclease activity	0.00552727	1
biological_process	GO:0033085	negative regulation of T cell differentiation in thymus	0.00552727	1
biological_process	GO:0034351	negative regulation of glial cell apoptotic process	0.00552727	1
biological_process	GO:0036490	regulation of translation in response to endoplasmic reticulum stress	0.00552727	1
biological_process	GO:0071671	regulation of smooth muscle cell chemotaxis	0.00552727	1
biological_process	GO:1901724	positive regulation of cell proliferation involved in kidney development	0.00552727	1
biological_process	GO:1901099	negative regulation of signal transduction in absence of ligand	0.0055318	1
biological_process	GO:2001240	negative regulation of extrinsic apoptotic signaling pathway in absence of ligand	0.0055318	1
biological_process	GO:0032868	response to insulin	0.00554504	1
biological_process	GO:0007019	microtubule depolymerization	0.00555766	1
biological_process	GO:0033046	negative regulation of sister chromatid segregation	0.00555766	1
biological_process	GO:1905819	negative regulation of chromosome separation	0.0055902	1
biological_process	GO:0007035	vacuolar acidification	0.00559107	1
biological_process	GO:0061339	establishment or maintenance of monopolar cell polarity	0.00559107	1
biological_process	GO:2000810	regulation of bicellular tight junction assembly	0.00559107	1
biological_process	GO:0030162	regulation of proteolysis	0.00559405	1
biological_process	GO:0046677	response to antibiotic	0.00563529	1
biological_process	GO:0019852	L-ascorbic acid metabolic process	0.00567212	1
biological_process	GO:0072110	glomerular mesangial cell proliferation	0.00567212	1
biological_process	GO:0072321	chaperone-mediated protein transport	0.00567212	1
biological_process	GO:0090193	positive regulation of glomerulus development	0.00567212	1
biological_process	GO:1900102	negative regulation of endoplasmic reticulum unfolded protein response	0.00567212	1
biological_process	GO:0006637	acyl-CoA metabolic process	0.00582949	1
biological_process	GO:0034404	nucleobase-containing small molecule biosynthetic process	0.00582949	1
biological_process	GO:0035383	thioester metabolic process	0.00582949	1
biological_process	GO:0009266	response to temperature stimulus	0.00583542	1
biological_process	GO:0030705	cytoskeleton-dependent intracellular transport	0.00589916	1
biological_process	GO:0051216	cartilage development	0.00593514	1
biological_process	GO:0090066	regulation of anatomical structure size	0.00593523	1
biological_process	GO:0043254	regulation of protein-containing complex assembly	0.00593827	1
biological_process	GO:0002237	response to molecule of bacterial origin	0.00604972	1
biological_process	GO:0009064	glutamine family amino acid metabolic process	0.00605311	1
biological_process	GO:0072395	signal transduction involved in cell cycle checkpoint	0.00605311	1
molecular_function	GO:0001601	peptide YY receptor activity	0.00610476	1
molecular_function	GO:0003955	NAD(P)H dehydrogenase (quinone) activity	0.00610476	1
molecular_function	GO:0005220	inositol 1,4,5-trisphosphate-sensitive calcium-release channel activity	0.00610476	1
molecular_function	GO:0046404	ATP-dependent polydeoxyribonucleotide 5'-hydroxyl-kinase activity	0.00610476	1
molecular_function	GO:0047756	chondroitin 4-sulfotransferase activity	0.00610476	1
molecular_function	GO:0051733	polydeoxyribonucleotide kinase activity	0.00610476	1
molecular_function	GO:0051734	ATP-dependent polynucleotide kinase activity	0.00610476	1
molecular_function	GO:1990518	single-stranded 3'-5' DNA helicase activity	0.00610476	1
molecular_function	GO:0016853	isomerase activity	0.00610611	1
molecular_function	GO:0019199	transmembrane receptor protein kinase activity	0.00616136	1
biological_process	GO:0044255	cellular lipid metabolic process	0.00619714	1
biological_process	GO:0090175	regulation of establishment of planar polarity	0.00620464	1
molecular_function	GO:0004549	tRNA-specific ribonuclease activity	0.00623465	1
biological_process	GO:0010965	regulation of mitotic sister chromatid separation	0.00629386	1
biological_process	GO:0050819	negative regulation of coagulation	0.00629386	1
biological_process	GO:0009896	positive regulation of catabolic process	0.00639857	1
biological_process	GO:0009408	response to heat	0.00642146	1
biological_process	GO:0030323	respiratory tube development	0.00642146	1
biological_process	GO:0051321	meiotic cell cycle	0.00643162	1
biological_process	GO:0071417	cellular response to organonitrogen compound	0.00644499	1
biological_process	GO:0070228	regulation of lymphocyte apoptotic process	0.00657339	1
biological_process	GO:1901185	negative regulation of ERBB signaling pathway	0.00657339	1
biological_process	GO:1902099	regulation of metaphase/anaphase transition of cell cycle	0.00657339	1
biological_process	GO:0016567	protein ubiquitination	0.00659233	1
molecular_function	GO:0051119	sugar transmembrane transporter activity	0.00660242	1
biological_process	GO:0106106	cold-induced thermogenesis	0.0066096	1
biological_process	GO:0120161	regulation of cold-induced thermogenesis	0.0066096	1
biological_process	GO:0060627	regulation of vesicle-mediated transport	0.00661271	1
biological_process	GO:0007162	negative regulation of cell adhesion	0.00661569	1
biological_process	GO:0002831	regulation of response to biotic stimulus	0.00662727	1
biological_process	GO:0140053	mitochondrial gene expression	0.00665791	1
biological_process	GO:0022900	electron transport chain	0.00668944	1
biological_process	GO:0051094	positive regulation of developmental process	0.00672235	1
molecular_function	GO:0003712	transcription coregulator activity	0.0067301	1
biological_process	GO:0071349	cellular response to interleukin-12	0.00682187	1
biological_process	GO:0070125	mitochondrial translational elongation	0.00682263	1
biological_process	GO:0051494	negative regulation of cytoskeleton organization	0.00683563	1
biological_process	GO:0015949	nucleobase-containing small molecule interconversion	0.00684536	1
biological_process	GO:0031114	regulation of microtubule depolymerization	0.00684536	1
biological_process	GO:0031116	positive regulation of microtubule polymerization	0.00684536	1
biological_process	GO:0035089	establishment of apical/basal cell polarity	0.00686344	1
biological_process	GO:0051782	negative regulation of cell division	0.00686344	1
biological_process	GO:0032535	regulation of cellular component size	0.00686703	1
biological_process	GO:0046777	protein autophosphorylation	0.00689036	1
biological_process	GO:0017015	regulation of transforming growth factor beta receptor signaling pathway	0.00690537	1
biological_process	GO:0030217	T cell differentiation	0.00694093	1
molecular_function	GO:0010997	anaphase-promoting complex binding	0.00697021	1
molecular_function	GO:0030235	nitric-oxide synthase regulator activity	0.00697021	1
molecular_function	GO:0032050	clathrin heavy chain binding	0.00697021	1
molecular_function	GO:0032052	bile acid binding	0.00697021	1
biological_process	GO:0030324	lung development	0.0069911	1
biological_process	GO:0031018	endocrine pancreas development	0.00702341	1
biological_process	GO:0035987	endodermal cell differentiation	0.00702341	1
biological_process	GO:0051985	negative regulation of chromosome segregation	0.00702341	1
biological_process	GO:0071559	response to transforming growth factor beta	0.00706019	1
biological_process	GO:0072659	protein localization to plasma membrane	0.00708987	1
biological_process	GO:0030851	granulocyte differentiation	0.00710698	1
biological_process	GO:0031112	positive regulation of microtubule polymerization or depolymerization	0.00710698	1
biological_process	GO:2000758	positive regulation of peptidyl-lysine acetylation	0.00710698	1
biological_process	GO:0022610	biological adhesion	0.0071189	1
biological_process	GO:0031623	receptor internalization	0.00712159	1
molecular_function	GO:0003714	transcription corepressor activity	0.00712207	1
biological_process	GO:0045005	DNA-dependent DNA replication maintenance of fidelity	0.00715725	1
biological_process	GO:0061028	establishment of endothelial barrier	0.00715725	1
biological_process	GO:0085029	extracellular matrix assembly	0.00715725	1
biological_process	GO:0007431	salivary gland development	0.00719656	1
molecular_function	GO:0016616	oxidoreductase activity, acting on the CH-OH group of donors, NAD or NADP as acceptor	0.00720811	1
molecular_function	GO:0030234	enzyme regulator activity	0.00734902	1
biological_process	GO:0033273	response to vitamin	0.007367	1
molecular_function	GO:0005536	glucose binding	0.007391	1
biological_process	GO:0005975	carbohydrate metabolic process	0.00743082	1
biological_process	GO:0009451	RNA modification	0.00743685	1
biological_process	GO:1900180	regulation of protein localization to nucleus	0.007501	1
molecular_function	GO:0016645	oxidoreductase activity, acting on the CH-NH group of donors	0.00752035	1
biological_process	GO:0007596	blood coagulation	0.00762504	1
biological_process	GO:0040017	positive regulation of locomotion	0.00766758	1
biological_process	GO:0046605	regulation of centrosome cycle	0.00767543	1
biological_process	GO:0042110	T cell activation	0.00780666	1
biological_process	GO:0032543	mitochondrial translation	0.00782787	1
molecular_function	GO:0072341	modified amino acid binding	0.00785698	1
biological_process	GO:0046718	viral entry into host cell	0.00786065	1
biological_process	GO:0032465	regulation of cytokinesis	0.00795775	1
biological_process	GO:0097306	cellular response to alcohol	0.00795775	1
biological_process	GO:0031331	positive regulation of cellular catabolic process	0.00800561	1
biological_process	GO:0060487	lung epithelial cell differentiation	0.00802452	1
biological_process	GO:0035384	thioester biosynthetic process	0.00807348	1
biological_process	GO:0071616	acyl-CoA biosynthetic process	0.00807348	1
biological_process	GO:0033865	nucleoside bisphosphate metabolic process	0.00810113	1
biological_process	GO:0033875	ribonucleoside bisphosphate metabolic process	0.00810113	1
biological_process	GO:0034032	purine nucleoside bisphosphate metabolic process	0.00810113	1
biological_process	GO:1903364	positive regulation of cellular protein catabolic process	0.00810113	1
biological_process	GO:0032880	regulation of protein localization	0.00816613	1
biological_process	GO:0007155	cell adhesion	0.00817414	1
biological_process	GO:0065003	protein-containing complex assembly	0.00821237	1
biological_process	GO:0050673	epithelial cell proliferation	0.00825418	1
biological_process	GO:0061458	reproductive system development	0.00825418	1
biological_process	GO:0006098	pentose-phosphate shunt	0.00828154	1
biological_process	GO:0034349	glial cell apoptotic process	0.00828154	1
biological_process	GO:0034616	response to laminar fluid shear stress	0.00828154	1
biological_process	GO:0060339	negative regulation of type I interferon-mediated signaling pathway	0.00828154	1
biological_process	GO:0070365	hepatocyte differentiation	0.00828154	1
biological_process	GO:0090192	regulation of glomerulus development	0.00828154	1
biological_process	GO:1902187	negative regulation of viral release from host cell	0.00828154	1
biological_process	GO:0051046	regulation of secretion	0.0083114	1
biological_process	GO:0090287	regulation of cellular response to growth factor stimulus	0.00841991	1
biological_process	GO:0070671	response to interleukin-12	0.00844812	1
biological_process	GO:0051100	negative regulation of binding	0.00846881	1
biological_process	GO:0055080	cation homeostasis	0.00848623	1
biological_process	GO:0006826	iron ion transport	0.00849771	1
biological_process	GO:0046785	microtubule polymerization	0.00849771	1
biological_process	GO:0030334	regulation of cell migration	0.00849842	1
molecular_function	GO:0016651	oxidoreductase activity, acting on NAD(P)H	0.00855243	1
biological_process	GO:0034308	primary alcohol metabolic process	0.00859092	1
biological_process	GO:0043009	chordate embryonic development	0.008617	1
molecular_function	GO:0030159	receptor signaling complex adaptor activity	0.00863513	1
biological_process	GO:1902903	regulation of supramolecular fiber organization	0.00869287	1
biological_process	GO:1901566	organonitrogen compound biosynthetic process	0.00870567	1
biological_process	GO:0007062	sister chromatid cohesion	0.00874719	1
biological_process	GO:0042255	ribosome assembly	0.00874719	1
biological_process	GO:2001235	positive regulation of apoptotic signaling pathway	0.00878697	1
molecular_function	GO:0043565	sequence-specific DNA binding	0.0088219	1
biological_process	GO:0060071	Wnt signaling pathway, planar cell polarity pathway	0.00885096	1
molecular_function	GO:0043621	protein self-association	0.00885482	1
biological_process	GO:0044782	cilium organization	0.0089588	1
molecular_function	GO:0000987	cis-regulatory region sequence-specific DNA binding	0.00899829	1
molecular_function	GO:0035326	cis-regulatory region binding	0.00899829	1
biological_process	GO:1901214	regulation of neuron death	0.00901444	1
biological_process	GO:0033048	negative regulation of mitotic sister chromatid segregation	0.00905438	1
biological_process	GO:0006302	double-strand break repair	0.00906856	1
biological_process	GO:0072527	pyrimidine-containing compound metabolic process	0.0090921	1
biological_process	GO:0008286	insulin receptor signaling pathway	0.00910311	1
biological_process	GO:0006362	transcription elongation from RNA polymerase I promoter	0.0091424	1
molecular_function	GO:0046872	metal ion binding	0.00926735	1
biological_process	GO:0007435	salivary gland morphogenesis	0.00928035	1
biological_process	GO:0042558	pteridine-containing compound metabolic process	0.00928035	1
biological_process	GO:2000273	positive regulation of signaling receptor activity	0.00928035	1
biological_process	GO:0001885	endothelial cell development	0.00929139	1
biological_process	GO:0043200	response to amino acid	0.00929354	1
biological_process	GO:0031396	regulation of protein ubiquitination	0.00938067	1
biological_process	GO:0007264	small GTPase mediated signal transduction	0.00939216	1
biological_process	GO:0048608	reproductive structure development	0.00946474	1
biological_process	GO:2000145	regulation of cell motility	0.00967231	1
biological_process	GO:0006563	L-serine metabolic process	0.00969107	1
biological_process	GO:0060707	trophoblast giant cell differentiation	0.00969107	1
biological_process	GO:0070243	regulation of thymocyte apoptotic process	0.00969107	1
biological_process	GO:0097201	negative regulation of transcription from RNA polymerase II promoter in response to stress	0.00969107	1
biological_process	GO:2000105	positive regulation of DNA-dependent DNA replication	0.00969107	1
biological_process	GO:0001817	regulation of cytokine production	0.00975724	1
biological_process	GO:0046323	glucose import	0.00977764	1
biological_process	GO:0050918	positive chemotaxis	0.00977764	1
biological_process	GO:0070830	bicellular tight junction assembly	0.00983602	1
biological_process	GO:0006399	tRNA metabolic process	0.00986039	1
biological_process	GO:0010975	regulation of neuron projection development	0.00991374	1
biological_process	GO:0034605	cellular response to heat	0.00991697	1
biological_process	GO:0072655	establishment of protein localization to mitochondrion	0.00991697	1
biological_process	GO:0006400	tRNA modification	0.0100003	1
biological_process	GO:0032101	regulation of response to external stimulus	0.0100297	1
biological_process	GO:0030031	cell projection assembly	0.0100457	1
biological_process	GO:0010888	negative regulation of lipid storage	0.0100759	1
biological_process	GO:0034471	ncRNA 5'-end processing	0.0100759	1
biological_process	GO:0042908	xenobiotic transport	0.0100759	1
biological_process	GO:0051131	chaperone-mediated protein complex assembly	0.0100759	1
biological_process	GO:0071731	response to nitric oxide	0.0100759	1
biological_process	GO:1902170	cellular response to reactive nitrogen species	0.0100759	1
biological_process	GO:0006886	intracellular protein transport	0.0100832	1
biological_process	GO:0009249	protein lipoylation	0.0100997	1
biological_process	GO:0010032	meiotic chromosome condensation	0.0100997	1
biological_process	GO:0010968	regulation of microtubule nucleation	0.0100997	1
biological_process	GO:0016185	synaptic vesicle budding from presynaptic endocytic zone membrane	0.0100997	1
biological_process	GO:0030174	regulation of DNA-dependent DNA replication initiation	0.0100997	1
biological_process	GO:0032056	positive regulation of translation in response to stress	0.0100997	1
biological_process	GO:0032534	regulation of microvillus assembly	0.0100997	1
biological_process	GO:0046113	nucleobase catabolic process	0.0100997	1
biological_process	GO:0060684	epithelial-mesenchymal cell signaling	0.0100997	1
biological_process	GO:0070837	dehydroascorbic acid transport	0.0100997	1
biological_process	GO:0045595	regulation of cell differentiation	0.0101587	1
biological_process	GO:1902904	negative regulation of supramolecular fiber organization	0.0102054	1
biological_process	GO:0048667	cell morphogenesis involved in neuron differentiation	0.0102083	1
biological_process	GO:0001655	urogenital system development	0.0103098	1
biological_process	GO:0051452	intracellular pH reduction	0.0103689	1
biological_process	GO:0000910	cytokinesis	0.0104231	1
biological_process	GO:0070498	interleukin-1-mediated signaling pathway	0.0104433	1
biological_process	GO:0002228	natural killer cell mediated immunity	0.0104613	1
biological_process	GO:0043297	apical junction assembly	0.0104613	1
biological_process	GO:0090263	positive regulation of canonical Wnt signaling pathway	0.0104734	1
biological_process	GO:1901135	carbohydrate derivative metabolic process	0.0106301	1
biological_process	GO:0006002	fructose 6-phosphate metabolic process	0.0106662	1
biological_process	GO:0031053	primary miRNA processing	0.0106662	1
biological_process	GO:0032933	SREBP signaling pathway	0.0106662	1
biological_process	GO:0042364	water-soluble vitamin biosynthetic process	0.0106662	1
biological_process	GO:0060693	regulation of branching involved in salivary gland morphogenesis	0.0106662	1
biological_process	GO:0070142	synaptic vesicle budding	0.0106662	1
biological_process	GO:1903867	extraembryonic membrane development	0.0106662	1
biological_process	GO:0007018	microtubule-based movement	0.0106805	1
biological_process	GO:1901992	positive regulation of mitotic cell cycle phase transition	0.0106922	1
biological_process	GO:0001890	placenta development	0.0107216	1
biological_process	GO:0031100	animal organ regeneration	0.0107595	1
biological_process	GO:0006414	translational elongation	0.0108058	1
biological_process	GO:0071158	positive regulation of cell cycle arrest	0.0108145	1
biological_process	GO:0035722	interleukin-12-mediated signaling pathway	0.0108733	1
biological_process	GO:0070849	response to epidermal growth factor	0.0108733	1
biological_process	GO:0007599	hemostasis	0.0109405	1
molecular_function	GO:0004029	aldehyde dehydrogenase (NAD+) activity	0.0110438	1
molecular_function	GO:0004659	prenyltransferase activity	0.0110438	1
molecular_function	GO:0015144	carbohydrate transmembrane transporter activity	0.0111287	1
biological_process	GO:0042267	natural killer cell mediated cytotoxicity	0.0111683	1
biological_process	GO:0120193	tight junction organization	0.0111683	1
biological_process	GO:0042401	cellular biogenic amine biosynthetic process	0.0111857	1
biological_process	GO:0060479	lung cell differentiation	0.0111857	1
biological_process	GO:0070841	inclusion body assembly	0.0111857	1
molecular_function	GO:0015145	monosaccharide transmembrane transporter activity	0.0112911	1
biological_process	GO:0008631	intrinsic apoptotic signaling pathway in response to oxidative stress	0.011326	1
biological_process	GO:0030866	cortical actin cytoskeleton organization	0.011326	1
molecular_function	GO:0004519	endonuclease activity	0.0113401	1
biological_process	GO:0033108	mitochondrial respiratory chain complex assembly	0.0113432	1
biological_process	GO:0042493	response to drug	0.0113509	1
biological_process	GO:0030879	mammary gland development	0.0114152	1
biological_process	GO:0051270	regulation of cellular component movement	0.0114698	1
biological_process	GO:0060828	regulation of canonical Wnt signaling pathway	0.0115341	1
biological_process	GO:0050766	positive regulation of phagocytosis	0.0115741	1
biological_process	GO:0051091	positive regulation of DNA-binding transcription factor activity	0.0116442	1
biological_process	GO:0043488	regulation of mRNA stability	0.0116925	1
biological_process	GO:0050817	coagulation	0.0117313	1
biological_process	GO:0120192	tight junction assembly	0.0118911	1
biological_process	GO:0000462	maturation of SSU-rRNA from tricistronic rRNA transcript (SSU-rRNA, 5.8S rRNA, LSU-rRNA)	0.0119365	1
biological_process	GO:0006369	termination of RNA polymerase II transcription	0.0119365	1
biological_process	GO:0009262	deoxyribonucleotide metabolic process	0.0119365	1
biological_process	GO:0048259	regulation of receptor-mediated endocytosis	0.0119532	1
biological_process	GO:0040011	locomotion	0.0119737	1
biological_process	GO:0051960	regulation of nervous system development	0.0119868	1
biological_process	GO:0006363	termination of RNA polymerase I transcription	0.0119909	1
biological_process	GO:0031572	G2 DNA damage checkpoint	0.0119909	1
biological_process	GO:0032770	positive regulation of monooxygenase activity	0.0119909	1
biological_process	GO:0045737	positive regulation of cyclin-dependent protein serine/threonine kinase activity	0.0119909	1
molecular_function	GO:0009055	electron transfer activity	0.0120514	1
biological_process	GO:0007565	female pregnancy	0.0120858	1
biological_process	GO:0044272	sulfur compound biosynthetic process	0.0120858	1
biological_process	GO:0046390	ribose phosphate biosynthetic process	0.0120858	1
biological_process	GO:0070371	ERK1 and ERK2 cascade	0.0121016	1
molecular_function	GO:0033300	dehydroascorbic acid transmembrane transporter activity	0.0122115	1
molecular_function	GO:0055131	C3HC4-type RING finger domain binding	0.0122115	1
biological_process	GO:0120031	plasma membrane bounded cell projection assembly	0.0122781	1
biological_process	GO:0045861	negative regulation of proteolysis	0.0122869	1
biological_process	GO:0030098	lymphocyte differentiation	0.0123828	1
biological_process	GO:0045944	positive regulation of transcription by RNA polymerase II	0.0124943	1
biological_process	GO:0000394	RNA splicing, via endonucleolytic cleavage and ligation	0.0125459	1
biological_process	GO:0006206	pyrimidine nucleobase metabolic process	0.0125459	1
biological_process	GO:0043217	myelin maintenance	0.0125459	1
biological_process	GO:0046134	pyrimidine nucleoside biosynthetic process	0.0125459	1
biological_process	GO:0072109	glomerular mesangium development	0.0125459	1
biological_process	GO:0099116	tRNA 5'-end processing	0.0125459	1
biological_process	GO:1901201	regulation of extracellular matrix assembly	0.0125459	1
biological_process	GO:0030036	actin cytoskeleton organization	0.0125517	1
biological_process	GO:0048145	regulation of fibroblast proliferation	0.0125619	1
biological_process	GO:1903845	negative regulation of cellular response to transforming growth factor beta stimulus	0.0125619	1
biological_process	GO:2000106	regulation of leukocyte apoptotic process	0.0125619	1
molecular_function	GO:0004714	transmembrane receptor protein tyrosine kinase activity	0.0125754	1
molecular_function	GO:0004033	aldo-keto reductase (NADP) activity	0.0125848	1
biological_process	GO:1900182	positive regulation of protein localization to nucleus	0.0126243	1
molecular_function	GO:0004674	protein serine/threonine kinase activity	0.0127326	1
biological_process	GO:0001659	temperature homeostasis	0.0127359	1
biological_process	GO:0006805	xenobiotic metabolic process	0.012838	1
biological_process	GO:0009615	response to virus	0.0129173	1
biological_process	GO:1903827	regulation of cellular protein localization	0.0129252	1
molecular_function	GO:0043169	cation binding	0.012945	1
biological_process	GO:1990845	adaptive thermogenesis	0.0132591	1
molecular_function	GO:0005381	iron ion transmembrane transporter activity	0.0133345	1
molecular_function	GO:0016670	oxidoreductase activity, acting on a sulfur group of donors, oxygen as acceptor	0.0133345	1
molecular_function	GO:0035256	G protein-coupled glutamate receptor binding	0.0133345	1
molecular_function	GO:0051880	G-quadruplex DNA binding	0.0133345	1
molecular_function	GO:0071936	coreceptor activity involved in Wnt signaling pathway	0.0133345	1
biological_process	GO:0030865	cortical cytoskeleton organization	0.0133353	1
biological_process	GO:0042059	negative regulation of epidermal growth factor receptor signaling pathway	0.0133353	1
molecular_function	GO:0035591	signaling adaptor activity	0.0134226	1
molecular_function	GO:0043548	phosphatidylinositol 3-kinase binding	0.0134303	1
biological_process	GO:0006397	mRNA processing	0.0134679	1
biological_process	GO:0001822	kidney development	0.013518	1
biological_process	GO:0030522	intracellular receptor signaling pathway	0.013518	1
biological_process	GO:0001816	cytokine production	0.0136608	1
biological_process	GO:0046578	regulation of Ras protein signal transduction	0.0137082	1
molecular_function	GO:0017022	myosin binding	0.0137197	1
biological_process	GO:0043603	cellular amide metabolic process	0.0137282	1
molecular_function	GO:0031690	adrenergic receptor binding	0.0137426	1
molecular_function	GO:0070182	DNA polymerase binding	0.0137426	1
biological_process	GO:0048660	regulation of smooth muscle cell proliferation	0.013875	1
biological_process	GO:0007080	mitotic metaphase plate congression	0.0140178	1
biological_process	GO:0043087	regulation of GTPase activity	0.0140208	1
biological_process	GO:0009416	response to light stimulus	0.0140396	1
biological_process	GO:0010972	negative regulation of G2/M transition of mitotic cell cycle	0.0141408	1
cellular_component	GO:0036064	ciliary basal body	0.0141502	1
biological_process	GO:0040012	regulation of locomotion	0.014201	1
biological_process	GO:0051310	metaphase plate congression	0.01427	1
biological_process	GO:0009219	pyrimidine deoxyribonucleotide metabolic process	0.0142806	1
biological_process	GO:0016137	glycoside metabolic process	0.0142806	1
biological_process	GO:0046655	folic acid metabolic process	0.0142806	1
biological_process	GO:0018105	peptidyl-serine phosphorylation	0.0142926	1
cellular_component	GO:0072686	mitotic spindle	0.0142971	1
molecular_function	GO:0042626	ATPase-coupled transmembrane transporter activity	0.0144682	1
biological_process	GO:0048144	fibroblast proliferation	0.0145279	1
biological_process	GO:0045124	regulation of bone resorption	0.0146342	1
cellular_component	GO:1990204	oxidoreductase complex	0.0146746	1
biological_process	GO:0051785	positive regulation of nuclear division	0.0146881	1
biological_process	GO:1903201	regulation of oxidative stress-induced cell death	0.0147373	1
biological_process	GO:0002065	columnar/cuboidal epithelial cell differentiation	0.0147663	1
biological_process	GO:0006885	regulation of pH	0.0148474	1
biological_process	GO:0060271	cilium assembly	0.0148498	1
biological_process	GO:0031334	positive regulation of protein-containing complex assembly	0.0148597	1
cellular_component	GO:0030658	transport vesicle membrane	0.0149687	1
biological_process	GO:0006361	transcription initiation from RNA polymerase I promoter	0.0151388	1
biological_process	GO:0060428	lung epithelium development	0.0151388	1
biological_process	GO:0006091	generation of precursor metabolites and energy	0.0151801	1
biological_process	GO:0045597	positive regulation of cell differentiation	0.0151822	1
biological_process	GO:0003181	atrioventricular valve morphogenesis	0.0151928	1
biological_process	GO:0046697	decidualization	0.0151928	1
biological_process	GO:0050687	negative regulation of defense response to virus	0.0151928	1
biological_process	GO:2000209	regulation of anoikis	0.0151928	1
molecular_function	GO:0003924	GTPase activity	0.0152242	1
biological_process	GO:0035065	regulation of histone acetylation	0.015233	1
biological_process	GO:0045851	pH reduction	0.015233	1
biological_process	GO:0045088	regulation of innate immune response	0.0152624	1
biological_process	GO:0070126	mitochondrial translational termination	0.0153811	1
biological_process	GO:0006596	polyamine biosynthetic process	0.0153862	1
biological_process	GO:0009162	deoxyribonucleoside monophosphate metabolic process	0.0153862	1
biological_process	GO:0009650	UV protection	0.0153862	1
biological_process	GO:0010745	negative regulation of macrophage derived foam cell differentiation	0.0153862	1
biological_process	GO:0014745	negative regulation of muscle adaptation	0.0153862	1
biological_process	GO:0031115	negative regulation of microtubule polymerization	0.0153862	1
biological_process	GO:0032530	regulation of microvillus organization	0.0153862	1
biological_process	GO:0042532	negative regulation of tyrosine phosphorylation of STAT protein	0.0153862	1
biological_process	GO:0060100	positive regulation of phagocytosis, engulfment	0.0153862	1
biological_process	GO:0070831	basement membrane assembly	0.0153862	1
biological_process	GO:1900103	positive regulation of endoplasmic reticulum unfolded protein response	0.0153862	1
biological_process	GO:1905155	positive regulation of membrane invagination	0.0153862	1
biological_process	GO:0045907	positive regulation of vasoconstriction	0.0154672	1
biological_process	GO:1901976	regulation of cell cycle checkpoint	0.0154672	1
biological_process	GO:0070585	protein localization to mitochondrion	0.0154737	1
biological_process	GO:0032091	negative regulation of protein binding	0.0155007	1
biological_process	GO:1905269	positive regulation of chromatin organization	0.0155007	1
biological_process	GO:0006760	folic acid-containing compound metabolic process	0.0155281	1
biological_process	GO:0050686	negative regulation of mRNA processing	0.0155281	1
biological_process	GO:0009792	embryo development ending in birth or egg hatching	0.0155802	1
molecular_function	GO:0008171	O-methyltransferase activity	0.0155963	1
cellular_component	GO:0032991	protein-containing complex	0.0156268	1
biological_process	GO:0006790	sulfur compound metabolic process	0.015685	1
biological_process	GO:0055123	digestive system development	0.0157651	1
biological_process	GO:0071222	cellular response to lipopolysaccharide	0.0160347	1
biological_process	GO:2000278	regulation of DNA biosynthetic process	0.0161028	1
biological_process	GO:0043281	regulation of cysteine-type endopeptidase activity involved in apoptotic process	0.0161132	1
biological_process	GO:1901216	positive regulation of neuron death	0.0161701	1
cellular_component	GO:0048471	perinuclear region of cytoplasm	0.0161735	1
biological_process	GO:0030856	regulation of epithelial cell differentiation	0.0162657	1
molecular_function	GO:0004030	aldehyde dehydrogenase [NAD(P)+] activity	0.0165817	1
molecular_function	GO:0008093	cytoskeletal adaptor activity	0.0165817	1
biological_process	GO:0009892	negative regulation of metabolic process	0.0165884	1
biological_process	GO:1901137	carbohydrate derivative biosynthetic process	0.0167094	1
biological_process	GO:0001701	in utero embryonic development	0.0167098	1
biological_process	GO:0019319	hexose biosynthetic process	0.0167304	1
biological_process	GO:2001057	reactive nitrogen species metabolic process	0.0167304	1
molecular_function	GO:0001968	fibronectin binding	0.0167801	1
biological_process	GO:0048659	smooth muscle cell proliferation	0.0168329	1
biological_process	GO:0010675	regulation of cellular carbohydrate metabolic process	0.0168813	1
cellular_component	GO:0000164	protein phosphatase type 1 complex	0.0169066	1
cellular_component	GO:0030681	multimeric ribonuclease P complex	0.0169066	1
cellular_component	GO:0043256	laminin complex	0.0169066	1
cellular_component	GO:0070938	contractile ring	0.0169066	1
biological_process	GO:0050767	regulation of neurogenesis	0.0171409	1
biological_process	GO:0018209	peptidyl-serine modification	0.0171526	1
biological_process	GO:0044275	cellular carbohydrate catabolic process	0.0171766	1
molecular_function	GO:0008514	organic anion transmembrane transporter activity	0.0171913	1
molecular_function	GO:0004879	nuclear receptor activity	0.0171964	1
molecular_function	GO:0098531	ligand-activated transcription factor activity	0.0171964	1
biological_process	GO:0045862	positive regulation of proteolysis	0.0172114	1
cellular_component	GO:0000120	RNA polymerase I transcription factor complex	0.0172248	1
cellular_component	GO:0000214	tRNA-intron endonuclease complex	0.0172248	1
cellular_component	GO:0000942	condensed nuclear chromosome outer kinetochore	0.0172248	1
cellular_component	GO:0043625	delta DNA polymerase complex	0.0172248	1
biological_process	GO:0009914	hormone transport	0.0172897	1
biological_process	GO:0015931	nucleobase-containing compound transport	0.0174437	1
biological_process	GO:0042593	glucose homeostasis	0.0174437	1
biological_process	GO:0097435	supramolecular fiber organization	0.017503	1
cellular_component	GO:0005680	anaphase-promoting complex	0.0175898	1
cellular_component	GO:0099091	postsynaptic specialization, intracellular component	0.0175898	1
biological_process	GO:0031058	positive regulation of histone modification	0.0176131	1
molecular_function	GO:0019903	protein phosphatase binding	0.017697	1
cellular_component	GO:0030125	clathrin vesicle coat	0.0177099	1
cellular_component	GO:0030131	clathrin adaptor complex	0.0177099	1
cellular_component	GO:1990752	microtubule end	0.0177099	1
molecular_function	GO:0016620	oxidoreductase activity, acting on the aldehyde or oxo group of donors, NAD or NADP as acceptor	0.0177438	1
cellular_component	GO:0030118	clathrin coat	0.0178424	1
biological_process	GO:0050434	positive regulation of viral transcription	0.0181057	1
biological_process	GO:0090224	regulation of spindle organization	0.0181057	1
cellular_component	GO:0005938	cell cortex	0.0181224	1
biological_process	GO:0001522	pseudouridine synthesis	0.0181859	1
biological_process	GO:0006544	glycine metabolic process	0.0181859	1
biological_process	GO:0006740	NADPH regeneration	0.0181859	1
biological_process	GO:0035313	wound healing, spreading of epidermal cells	0.0181859	1
biological_process	GO:0070242	thymocyte apoptotic process	0.0181859	1
biological_process	GO:0097329	response to antimetabolite	0.0181859	1
biological_process	GO:2000811	negative regulation of anoikis	0.0181859	1
biological_process	GO:0002159	desmosome assembly	0.0181888	1
biological_process	GO:0002943	tRNA dihydrouridine synthesis	0.0181888	1
biological_process	GO:0003104	positive regulation of glomerular filtration	0.0181888	1
biological_process	GO:0006273	lagging strand elongation	0.0181888	1
biological_process	GO:0006562	proline catabolic process	0.0181888	1
biological_process	GO:0006808	regulation of nitrogen utilization	0.0181888	1
biological_process	GO:0007089	traversing start control point of mitotic cell cycle	0.0181888	1
biological_process	GO:0007598	blood coagulation, extrinsic pathway	0.0181888	1
biological_process	GO:0009753	response to jasmonic acid	0.0181888	1
biological_process	GO:0019470	4-hydroxyproline catabolic process	0.0181888	1
biological_process	GO:0030423	targeting of mRNA for destruction involved in RNA interference	0.0181888	1
biological_process	GO:0030951	establishment or maintenance of microtubule cytoskeleton polarity	0.0181888	1
biological_process	GO:0032058	positive regulation of translational initiation in response to stress	0.0181888	1
biological_process	GO:0032447	protein urmylation	0.0181888	1
biological_process	GO:0033489	cholesterol biosynthetic process via desmosterol	0.0181888	1
biological_process	GO:0033490	cholesterol biosynthetic process via lathosterol	0.0181888	1
biological_process	GO:0034465	response to carbon monoxide	0.0181888	1
biological_process	GO:0043137	DNA replication, removal of RNA primer	0.0181888	1
biological_process	GO:0045337	farnesyl diphosphate biosynthetic process	0.0181888	1
biological_process	GO:0045905	positive regulation of translational termination	0.0181888	1
biological_process	GO:0048499	synaptic vesicle membrane organization	0.0181888	1
biological_process	GO:0060282	positive regulation of oocyte development	0.0181888	1
biological_process	GO:0060319	primitive erythrocyte differentiation	0.0181888	1
biological_process	GO:0071211	protein targeting to vacuole involved in autophagy	0.0181888	1
biological_process	GO:0071395	cellular response to jasmonic acid stimulus	0.0181888	1
biological_process	GO:0090063	positive regulation of microtubule nucleation	0.0181888	1
biological_process	GO:0097056	selenocysteinyl-tRNA(Sec) biosynthetic process	0.0181888	1
biological_process	GO:0097296	activation of cysteine-type endopeptidase activity involved in apoptotic signaling pathway	0.0181888	1
biological_process	GO:1903912	negative regulation of endoplasmic reticulum stress-induced eIF2 alpha phosphorylation	0.0181888	1
biological_process	GO:1904612	response to 2,3,7,8-tetrachlorodibenzodioxine	0.0181888	1
biological_process	GO:1904751	positive regulation of protein localization to nucleolus	0.0181888	1
biological_process	GO:1905653	positive regulation of artery morphogenesis	0.0181888	1
biological_process	GO:1905867	epididymis development	0.0181888	1
biological_process	GO:1905881	positive regulation of oogenesis	0.0181888	1
biological_process	GO:2000587	negative regulation of platelet-derived growth factor receptor-beta signaling pathway	0.0181888	1
biological_process	GO:0030512	negative regulation of transforming growth factor beta receptor signaling pathway	0.0181978	1
biological_process	GO:0060761	negative regulation of response to cytokine stimulus	0.0181978	1
biological_process	GO:0002934	desmosome organization	0.0183122	1
biological_process	GO:0003183	mitral valve morphogenesis	0.0183122	1
biological_process	GO:0010998	regulation of translational initiation by eIF2 alpha phosphorylation	0.0183122	1
biological_process	GO:0018065	protein-cofactor linkage	0.0183122	1
biological_process	GO:0032464	positive regulation of protein homooligomerization	0.0183122	1
biological_process	GO:0036500	ATF6-mediated unfolded protein response	0.0183122	1
biological_process	GO:0038063	collagen-activated tyrosine kinase receptor signaling pathway	0.0183122	1
biological_process	GO:0043471	regulation of cellular carbohydrate catabolic process	0.0183122	1
biological_process	GO:0071501	cellular response to sterol depletion	0.0183122	1
biological_process	GO:0071670	smooth muscle cell chemotaxis	0.0183122	1
biological_process	GO:0090205	positive regulation of cholesterol metabolic process	0.0183122	1
biological_process	GO:0090557	establishment of endothelial intestinal barrier	0.0183122	1
biological_process	GO:1902237	positive regulation of endoplasmic reticulum stress-induced intrinsic apoptotic signaling pathway	0.0183122	1
biological_process	GO:1903897	regulation of PERK-mediated unfolded protein response	0.0183122	1
biological_process	GO:2001225	regulation of chloride transport	0.0183122	1
cellular_component	GO:0005871	kinesin complex	0.0183378	1
biological_process	GO:0033209	tumor necrosis factor-mediated signaling pathway	0.0183393	1
biological_process	GO:1903076	regulation of protein localization to plasma membrane	0.0184235	1
cellular_component	GO:0030863	cortical cytoskeleton	0.0185311	1
biological_process	GO:0009123	nucleoside monophosphate metabolic process	0.0185765	1
biological_process	GO:0009301	snRNA transcription	0.0185765	1
biological_process	GO:0008543	fibroblast growth factor receptor signaling pathway	0.0187327	1
biological_process	GO:0030218	erythrocyte differentiation	0.0187327	1
biological_process	GO:0033500	carbohydrate homeostasis	0.0188588	1
biological_process	GO:0048839	inner ear development	0.0188976	1
biological_process	GO:0072330	monocarboxylic acid biosynthetic process	0.018913	1
biological_process	GO:0034405	response to fluid shear stress	0.0189511	1
biological_process	GO:0043243	positive regulation of protein-containing complex disassembly	0.0189511	1
biological_process	GO:0051084	'de novo' posttranslational protein folding	0.0189511	1
biological_process	GO:0060236	regulation of mitotic spindle organization	0.0189511	1
biological_process	GO:0042445	hormone metabolic process	0.018958	1
biological_process	GO:1902806	regulation of cell cycle G1/S phase transition	0.0189944	1
cellular_component	GO:0005683	U7 snRNP	0.0190154	1
cellular_component	GO:0031931	TORC1 complex	0.0190154	1
cellular_component	GO:0048179	activin receptor complex	0.0190154	1
biological_process	GO:0071219	cellular response to molecule of bacterial origin	0.019032	1
biological_process	GO:0061640	cytoskeleton-dependent cytokinesis	0.0191648	1
biological_process	GO:0001776	leukocyte homeostasis	0.0191874	1
biological_process	GO:0055082	cellular chemical homeostasis	0.0192023	1
biological_process	GO:0072001	renal system development	0.019236	1
molecular_function	GO:0005355	glucose transmembrane transporter activity	0.0193032	1
molecular_function	GO:0015149	hexose transmembrane transporter activity	0.0193032	1
biological_process	GO:0007423	sensory organ development	0.0193903	1
biological_process	GO:0072521	purine-containing compound metabolic process	0.0194866	1
biological_process	GO:0001706	endoderm formation	0.0195349	1
biological_process	GO:1900087	positive regulation of G1/S transition of mitotic cell cycle	0.0195349	1
biological_process	GO:1903829	positive regulation of cellular protein localization	0.019606	1
biological_process	GO:0000966	RNA 5'-end processing	0.019628	1
biological_process	GO:0001779	natural killer cell differentiation	0.019628	1
biological_process	GO:0006144	purine nucleobase metabolic process	0.019628	1
biological_process	GO:0032332	positive regulation of chondrocyte differentiation	0.019628	1
biological_process	GO:1903055	positive regulation of extracellular matrix organization	0.019628	1
biological_process	GO:0006370	7-methylguanosine mRNA capping	0.0196473	1
biological_process	GO:0010955	negative regulation of protein processing	0.0196473	1
biological_process	GO:1903318	negative regulation of protein maturation	0.0196473	1
biological_process	GO:0032446	protein modification by small protein conjugation	0.0196612	1
molecular_function	GO:0003906	DNA-(apurinic or apyrimidinic site) endonuclease activity	0.0196985	1
molecular_function	GO:0005172	vascular endothelial growth factor receptor binding	0.0196985	1
molecular_function	GO:0009982	pseudouridine synthase activity	0.0196985	1
molecular_function	GO:0016653	oxidoreductase activity, acting on NAD(P)H, heme protein as acceptor	0.0196985	1
molecular_function	GO:0086080	protein binding involved in heterotypic cell-cell adhesion	0.0196985	1
biological_process	GO:0048678	response to axon injury	0.019793	1
biological_process	GO:0035690	cellular response to drug	0.0198807	1
cellular_component	GO:0030427	site of polarized growth	0.019905	1
cellular_component	GO:0030173	integral component of Golgi membrane	0.0199113	1
biological_process	GO:0007033	vacuole organization	0.0199847	1
molecular_function	GO:0019207	kinase regulator activity	0.0200175	1
biological_process	GO:0008299	isoprenoid biosynthetic process	0.020098	1
biological_process	GO:0042219	cellular modified amino acid catabolic process	0.020098	1
biological_process	GO:0061099	negative regulation of protein tyrosine kinase activity	0.020098	1
biological_process	GO:0072413	signal transduction involved in mitotic cell cycle checkpoint	0.0201262	1
biological_process	GO:1902402	signal transduction involved in mitotic DNA damage checkpoint	0.0201262	1
biological_process	GO:1902403	signal transduction involved in mitotic DNA integrity checkpoint	0.0201262	1
biological_process	GO:0033047	regulation of mitotic sister chromatid segregation	0.0201495	1
biological_process	GO:0071230	cellular response to amino acid stimulus	0.0201495	1
biological_process	GO:0007026	negative regulation of microtubule depolymerization	0.0201616	1
biological_process	GO:0045662	negative regulation of myoblast differentiation	0.0201616	1
biological_process	GO:0022407	regulation of cell-cell adhesion	0.0201757	1
molecular_function	GO:0005178	integrin binding	0.0202059	1
cellular_component	GO:0031970	organelle envelope lumen	0.0203018	1
biological_process	GO:0009445	putrescine metabolic process	0.0203408	1
biological_process	GO:0031077	post-embryonic camera-type eye development	0.0203408	1
biological_process	GO:0032466	negative regulation of cytokinesis	0.0203408	1
biological_process	GO:0032819	positive regulation of natural killer cell proliferation	0.0203408	1
biological_process	GO:0032825	positive regulation of natural killer cell differentiation	0.0203408	1
biological_process	GO:0035234	ectopic germ cell programmed cell death	0.0203408	1
biological_process	GO:0035356	cellular triglyceride homeostasis	0.0203408	1
biological_process	GO:0035726	common myeloid progenitor cell proliferation	0.0203408	1
biological_process	GO:0036491	regulation of translation initiation in response to endoplasmic reticulum stress	0.0203408	1
biological_process	GO:0051256	mitotic spindle midzone assembly	0.0203408	1
biological_process	GO:0060592	mammary gland formation	0.0203408	1
biological_process	GO:0061668	mitochondrial ribosome assembly	0.0203408	1
biological_process	GO:0070244	negative regulation of thymocyte apoptotic process	0.0203408	1
biological_process	GO:0086042	cardiac muscle cell-cardiac muscle cell adhesion	0.0203408	1
biological_process	GO:0097187	dentinogenesis	0.0203408	1
biological_process	GO:0150093	amyloid-beta clearance by transcytosis	0.0203408	1
biological_process	GO:1901509	regulation of endothelial tube morphogenesis	0.0203408	1
biological_process	GO:1902231	positive regulation of intrinsic apoptotic signaling pathway in response to DNA damage	0.0203408	1
biological_process	GO:1904747	positive regulation of apoptotic process involved in development	0.0203408	1
biological_process	GO:1990001	inhibition of cysteine-type endopeptidase activity involved in apoptotic process	0.0203408	1
biological_process	GO:0033559	unsaturated fatty acid metabolic process	0.0204541	1
biological_process	GO:0044409	entry into host	0.02048	1
biological_process	GO:0043487	regulation of RNA stability	0.0204847	1
biological_process	GO:0060070	canonical Wnt signaling pathway	0.0205397	1
biological_process	GO:1903046	meiotic cell cycle process	0.0205569	1
biological_process	GO:0006811	ion transport	0.0206084	1
biological_process	GO:0099504	synaptic vesicle cycle	0.0206105	1
biological_process	GO:0010001	glial cell differentiation	0.0206419	1
biological_process	GO:0060541	respiratory system development	0.0206469	1
biological_process	GO:0099003	vesicle-mediated transport in synapse	0.0206638	1
biological_process	GO:0007266	Rho protein signal transduction	0.0206673	1
biological_process	GO:0044257	cellular protein catabolic process	0.0207854	1
biological_process	GO:0035088	establishment or maintenance of apical/basal cell polarity	0.020849	1
biological_process	GO:0051646	mitochondrion localization	0.020849	1
biological_process	GO:0061245	establishment or maintenance of bipolar cell polarity	0.020849	1
biological_process	GO:0006094	gluconeogenesis	0.020905	1
biological_process	GO:0046209	nitric oxide metabolic process	0.020905	1
biological_process	GO:0042632	cholesterol homeostasis	0.0209166	1
biological_process	GO:1905037	autophagosome organization	0.0209166	1
molecular_function	GO:0000217	DNA secondary structure binding	0.0209927	1
biological_process	GO:1904375	regulation of protein localization to cell periphery	0.0210093	1
molecular_function	GO:0000213	tRNA-intron endonuclease activity	0.0210735	1
molecular_function	GO:0000992	RNA polymerase III cis-regulatory region sequence-specific DNA binding	0.0210735	1
molecular_function	GO:0004486	methylenetetrahydrofolate dehydrogenase [NAD(P)+] activity	0.0210735	1
molecular_function	GO:0004488	methylenetetrahydrofolate dehydrogenase (NADP+) activity	0.0210735	1
molecular_function	GO:0004740	pyruvate dehydrogenase (acetyl-transferring) kinase activity	0.0210735	1
molecular_function	GO:0004784	superoxide dismutase activity	0.0210735	1
molecular_function	GO:0005353	fructose transmembrane transporter activity	0.0210735	1
molecular_function	GO:0008309	double-stranded DNA exodeoxyribonuclease activity	0.0210735	1
molecular_function	GO:0008853	exodeoxyribonuclease III activity	0.0210735	1
molecular_function	GO:0016721	oxidoreductase activity, acting on superoxide radicals as acceptor	0.0210735	1
molecular_function	GO:0016972	thiol oxidase activity	0.0210735	1
molecular_function	GO:0017150	tRNA dihydrouridine synthase activity	0.0210735	1
molecular_function	GO:0031697	beta-1 adrenergic receptor binding	0.0210735	1
molecular_function	GO:0043125	ErbB-3 class receptor binding	0.0210735	1
molecular_function	GO:0051731	polynucleotide 5'-hydroxyl-kinase activity	0.0210735	1
cellular_component	GO:0010369	chromocenter	0.0210742	1
cellular_component	GO:0030677	ribonuclease P complex	0.0210742	1
cellular_component	GO:0038201	TOR complex	0.0210742	1
biological_process	GO:0072594	establishment of protein localization to organelle	0.0212637	1
biological_process	GO:0098609	cell-cell adhesion	0.0212749	1
biological_process	GO:0045664	regulation of neuron differentiation	0.0212976	1
cellular_component	GO:0005758	mitochondrial intermembrane space	0.021501	1
biological_process	GO:1903052	positive regulation of proteolysis involved in cellular protein catabolic process	0.0215097	1
biological_process	GO:0000209	protein polyubiquitination	0.0215174	1
biological_process	GO:0050688	regulation of defense response to virus	0.0215263	1
biological_process	GO:0002090	regulation of receptor internalization	0.0216984	1
biological_process	GO:0002252	immune effector process	0.0217572	1
biological_process	GO:0019439	aromatic compound catabolic process	0.0217788	1
cellular_component	GO:0001726	ruffle	0.0218231	1
biological_process	GO:1901607	alpha-amino acid biosynthetic process	0.0218449	1
biological_process	GO:0070372	regulation of ERK1 and ERK2 cascade	0.0218938	1
biological_process	GO:0001892	embryonic placenta development	0.0219173	1
biological_process	GO:0051896	regulation of protein kinase B signaling	0.0219677	1
biological_process	GO:0006508	proteolysis	0.0220287	1
biological_process	GO:0010469	regulation of signaling receptor activity	0.0220883	1
biological_process	GO:0071453	cellular response to oxygen levels	0.0221549	1
biological_process	GO:0017145	stem cell division	0.0221632	1
biological_process	GO:0006611	protein export from nucleus	0.0222948	1
biological_process	GO:0008361	regulation of cell size	0.0222948	1
molecular_function	GO:0071949	FAD binding	0.022308	1
biological_process	GO:0031346	positive regulation of cell projection organization	0.0224295	1
biological_process	GO:0051168	nuclear export	0.0224455	1
biological_process	GO:0006109	regulation of carbohydrate metabolic process	0.022459	1
biological_process	GO:0061013	regulation of mRNA catabolic process	0.022459	1
biological_process	GO:0051603	proteolysis involved in cellular protein catabolic process	0.0225377	1
molecular_function	GO:0000978	RNA polymerase II cis-regulatory region sequence-specific DNA binding	0.0226466	1
cellular_component	GO:0043025	neuronal cell body	0.022683	1
molecular_function	GO:0033204	ribonuclease P RNA binding	0.0226981	1
molecular_function	GO:0046974	histone methyltransferase activity (H3-K9 specific)	0.0226981	1
molecular_function	GO:0140078	class I DNA-(apurinic or apyrimidinic site) endonuclease activity	0.0226981	1
biological_process	GO:0042246	tissue regeneration	0.0227789	1
biological_process	GO:0052548	regulation of endopeptidase activity	0.022817	1
biological_process	GO:1904019	epithelial cell apoptotic process	0.022951	1
biological_process	GO:0044089	positive regulation of cellular component biogenesis	0.0229985	1
cellular_component	GO:0099092	postsynaptic density, intracellular component	0.023024	1
biological_process	GO:0010917	negative regulation of mitochondrial membrane potential	0.023036	1
biological_process	GO:0021781	glial cell fate commitment	0.023036	1
biological_process	GO:0042574	retinal metabolic process	0.023036	1
biological_process	GO:0043455	regulation of secondary metabolic process	0.023036	1
biological_process	GO:0046606	negative regulation of centrosome cycle	0.023036	1
biological_process	GO:0055064	chloride ion homeostasis	0.023036	1
biological_process	GO:0070672	response to interleukin-15	0.023036	1
biological_process	GO:0071941	nitrogen cycle metabolic process	0.023036	1
biological_process	GO:0072567	chemokine (C-X-C motif) ligand 2 production	0.023036	1
biological_process	GO:0090231	regulation of spindle checkpoint	0.023036	1
biological_process	GO:0090266	regulation of mitotic cell cycle spindle assembly checkpoint	0.023036	1
biological_process	GO:0099171	presynaptic modulation of chemical synaptic transmission	0.023036	1
biological_process	GO:0106070	regulation of adenylate cyclase-activating G protein-coupled receptor signaling pathway	0.023036	1
biological_process	GO:1901722	regulation of cell proliferation involved in kidney development	0.023036	1
biological_process	GO:1902570	protein localization to nucleolus	0.023036	1
biological_process	GO:1903504	regulation of mitotic spindle checkpoint	0.023036	1
biological_process	GO:2000345	regulation of hepatocyte proliferation	0.023036	1
biological_process	GO:0051345	positive regulation of hydrolase activity	0.0232878	1
biological_process	GO:0071901	negative regulation of protein serine/threonine kinase activity	0.0233042	1
cellular_component	GO:0030027	lamellipodium	0.0233462	1
biological_process	GO:0009066	aspartate family amino acid metabolic process	0.023354	1
biological_process	GO:0045744	negative regulation of G protein-coupled receptor signaling pathway	0.023354	1
molecular_function	GO:0019902	phosphatase binding	0.0233798	1
biological_process	GO:0042698	ovulation cycle	0.0234082	1
biological_process	GO:0006298	mismatch repair	0.0234361	1
biological_process	GO:0009225	nucleotide-sugar metabolic process	0.0234361	1
biological_process	GO:0021782	glial cell development	0.0234978	1
biological_process	GO:0010951	negative regulation of endopeptidase activity	0.0235376	1
biological_process	GO:0002521	leukocyte differentiation	0.0236552	1
biological_process	GO:0055092	sterol homeostasis	0.0236651	1
biological_process	GO:1902882	regulation of response to oxidative stress	0.0236651	1
biological_process	GO:0046324	regulation of glucose import	0.0236677	1
cellular_component	GO:0005741	mitochondrial outer membrane	0.0237475	1
molecular_function	GO:0030676	Rac guanyl-nucleotide exchange factor activity	0.0238247	1
molecular_function	GO:0035173	histone kinase activity	0.0238247	1
biological_process	GO:1904018	positive regulation of vasculature development	0.0240133	1
biological_process	GO:0007369	gastrulation	0.0243794	1
biological_process	GO:0009260	ribonucleotide biosynthetic process	0.0243794	1
molecular_function	GO:0004128	cytochrome-b5 reductase activity, acting on NAD(P)H	0.0243906	1
molecular_function	GO:0004711	ribosomal protein S6 kinase activity	0.0243906	1
molecular_function	GO:0005138	interleukin-6 receptor binding	0.0243906	1
molecular_function	GO:0008318	protein prenyltransferase activity	0.0243906	1
molecular_function	GO:0016842	amidine-lyase activity	0.0243906	1
molecular_function	GO:0030297	transmembrane receptor protein tyrosine kinase activator activity	0.0243906	1
molecular_function	GO:0070324	thyroid hormone binding	0.0243906	1
biological_process	GO:2000377	regulation of reactive oxygen species metabolic process	0.0244082	1
biological_process	GO:2000379	positive regulation of reactive oxygen species metabolic process	0.0244119	1
biological_process	GO:0090101	negative regulation of transmembrane receptor protein serine/threonine kinase signaling pathway	0.0244198	1
biological_process	GO:0009452	7-methylguanosine RNA capping	0.0246054	1
biological_process	GO:0032148	activation of protein kinase B activity	0.0246054	1
biological_process	GO:0036260	RNA capping	0.0246054	1
biological_process	GO:0043094	cellular metabolic compound salvage	0.0246054	1
biological_process	GO:0097009	energy homeostasis	0.0246054	1
biological_process	GO:0070373	negative regulation of ERK1 and ERK2 cascade	0.0248233	1
biological_process	GO:0051056	regulation of small GTPase mediated signal transduction	0.0248306	1
biological_process	GO:1904035	regulation of epithelial cell apoptotic process	0.0249385	1
biological_process	GO:0030261	chromosome condensation	0.0250811	1
biological_process	GO:0070169	positive regulation of biomineral tissue development	0.0250811	1
biological_process	GO:0110151	positive regulation of biomineralization	0.0250811	1
biological_process	GO:0120163	negative regulation of cold-induced thermogenesis	0.0250811	1
biological_process	GO:2000107	negative regulation of leukocyte apoptotic process	0.0250811	1
biological_process	GO:0098781	ncRNA transcription	0.0250815	1
molecular_function	GO:0016538	cyclin-dependent protein serine/threonine kinase regulator activity	0.0251623	1
molecular_function	GO:0004518	nuclease activity	0.0253062	1
molecular_function	GO:0044212	transcription regulatory region DNA binding	0.0253672	1
biological_process	GO:0002902	regulation of B cell apoptotic process	0.0253911	1
biological_process	GO:0031468	nuclear envelope reassembly	0.0253911	1
biological_process	GO:0070233	negative regulation of T cell apoptotic process	0.0253911	1
biological_process	GO:0070633	transepithelial transport	0.0253911	1
biological_process	GO:0071371	cellular response to gonadotropin stimulus	0.0253911	1
biological_process	GO:0072311	glomerular epithelial cell differentiation	0.0253911	1
molecular_function	GO:0140098	catalytic activity, acting on RNA	0.0254171	1
biological_process	GO:0009166	nucleotide catabolic process	0.0254494	1
biological_process	GO:0070192	chromosome organization involved in meiotic cell cycle	0.0254494	1
biological_process	GO:0008380	RNA splicing	0.02547	1
molecular_function	GO:0000976	transcription regulatory region sequence-specific DNA binding	0.0254982	1
cellular_component	GO:0044297	cell body	0.0255155	1
biological_process	GO:0031589	cell-substrate adhesion	0.0255274	1
biological_process	GO:0010743	regulation of macrophage derived foam cell differentiation	0.0255758	1
biological_process	GO:0048873	homeostasis of number of cells within a tissue	0.0255758	1
biological_process	GO:0097421	liver regeneration	0.0255758	1
biological_process	GO:0006977	DNA damage response, signal transduction by p53 class mediator resulting in cell cycle arrest	0.0256213	1
biological_process	GO:0046148	pigment biosynthetic process	0.0256213	1
biological_process	GO:1903078	positive regulation of protein localization to plasma membrane	0.0256213	1
biological_process	GO:0001938	positive regulation of endothelial cell proliferation	0.0256792	1
biological_process	GO:1900034	regulation of cellular response to heat	0.026099	1
biological_process	GO:1903312	negative regulation of mRNA metabolic process	0.026099	1
biological_process	GO:0003171	atrioventricular valve development	0.0262019	1
biological_process	GO:0003351	epithelial cilium movement involved in extracellular fluid movement	0.0262019	1
biological_process	GO:0032897	negative regulation of viral transcription	0.0262019	1
biological_process	GO:0051497	negative regulation of stress fiber assembly	0.0262019	1
biological_process	GO:0051788	response to misfolded protein	0.0262019	1
biological_process	GO:0055083	monovalent inorganic anion homeostasis	0.0262019	1
biological_process	GO:0060706	cell differentiation involved in embryonic placenta development	0.0262019	1
biological_process	GO:0071711	basement membrane organization	0.0262019	1
biological_process	GO:1900120	regulation of receptor binding	0.0262019	1
biological_process	GO:0010970	transport along microtubule	0.0262184	1
cellular_component	GO:0070820	tertiary granule	0.0262442	1
biological_process	GO:0000469	cleavage involved in rRNA processing	0.0262585	1
biological_process	GO:0006085	acetyl-CoA biosynthetic process	0.0262585	1
biological_process	GO:0042359	vitamin D metabolic process	0.0262585	1
biological_process	GO:1901798	positive regulation of signal transduction by p53 class mediator	0.0262585	1
molecular_function	GO:0008106	alcohol dehydrogenase (NADP+) activity	0.0262962	1
molecular_function	GO:0016799	hydrolase activity, hydrolyzing N-glycosyl compounds	0.0262962	1
cellular_component	GO:0030667	secretory granule membrane	0.026383	1
molecular_function	GO:0001067	regulatory region nucleic acid binding	0.0264204	1
biological_process	GO:0046700	heterocycle catabolic process	0.0265862	1
biological_process	GO:0044265	cellular macromolecule catabolic process	0.0266318	1
molecular_function	GO:0017048	Rho GTPase binding	0.0267075	1
cellular_component	GO:0031094	platelet dense tubular network	0.0267112	1
molecular_function	GO:0017124	SH3 domain binding	0.0267601	1
biological_process	GO:0010824	regulation of centrosome duplication	0.0268593	1
biological_process	GO:0017158	regulation of calcium ion-dependent exocytosis	0.0268593	1
biological_process	GO:0038202	TORC1 signaling	0.0268593	1
biological_process	GO:0051293	establishment of spindle localization	0.0268593	1
biological_process	GO:0072348	sulfur compound transport	0.0268593	1
biological_process	GO:1901985	positive regulation of protein acetylation	0.0268593	1
molecular_function	GO:0004520	endodeoxyribonuclease activity	0.0269795	1
molecular_function	GO:0051539	4 iron, 4 sulfur cluster binding	0.0269795	1
biological_process	GO:0001505	regulation of neurotransmitter levels	0.0271051	1
molecular_function	GO:0016667	oxidoreductase activity, acting on a sulfur group of donors	0.0272298	1
molecular_function	GO:0016765	transferase activity, transferring alkyl or aryl (other than methyl) groups	0.0272298	1
biological_process	GO:0051453	regulation of intracellular pH	0.0272445	1
biological_process	GO:1903311	regulation of mRNA metabolic process	0.0272992	1
biological_process	GO:0006873	cellular ion homeostasis	0.0273637	1
biological_process	GO:0001501	skeletal system development	0.0274595	1
molecular_function	GO:0043027	cysteine-type endopeptidase inhibitor activity involved in apoptotic process	0.0276096	1
molecular_function	GO:0048027	mRNA 5'-UTR binding	0.0276096	1
molecular_function	GO:0017147	Wnt-protein binding	0.0276595	1
biological_process	GO:0003170	heart valve development	0.0276604	1
biological_process	GO:0032370	positive regulation of lipid transport	0.0276604	1
biological_process	GO:0034113	heterotypic cell-cell adhesion	0.0276604	1
biological_process	GO:0034220	ion transmembrane transport	0.0276629	1
cellular_component	GO:0000777	condensed chromosome kinetochore	0.0277394	1
biological_process	GO:0043122	regulation of I-kappaB kinase/NF-kappaB signaling	0.027745	1
biological_process	GO:0150063	visual system development	0.0280673	1
biological_process	GO:0002526	acute inflammatory response	0.0280744	1
biological_process	GO:0036294	cellular response to decreased oxygen levels	0.0283442	1
biological_process	GO:0000187	activation of MAPK activity	0.0284266	1
biological_process	GO:0034250	positive regulation of cellular amide metabolic process	0.0284266	1
biological_process	GO:0001960	negative regulation of cytokine-mediated signaling pathway	0.0284909	1
biological_process	GO:0003281	ventricular septum development	0.0284909	1
biological_process	GO:0034284	response to monosaccharide	0.0285718	1
biological_process	GO:0071456	cellular response to hypoxia	0.0285718	1
biological_process	GO:0009163	nucleoside biosynthetic process	0.0286545	1
biological_process	GO:0051180	vitamin transport	0.0286545	1
biological_process	GO:1902116	negative regulation of organelle assembly	0.0286545	1
biological_process	GO:1902229	regulation of intrinsic apoptotic signaling pathway in response to DNA damage	0.0286545	1
biological_process	GO:0051648	vesicle localization	0.0286639	1
biological_process	GO:0006511	ubiquitin-dependent protein catabolic process	0.0287197	1
biological_process	GO:0000185	activation of MAPKKK activity	0.0288457	1
biological_process	GO:0000478	endonucleolytic cleavage involved in rRNA processing	0.0288457	1
biological_process	GO:0000479	endonucleolytic cleavage of tricistronic rRNA transcript (SSU-rRNA, 5.8S rRNA, LSU-rRNA)	0.0288457	1
biological_process	GO:0003174	mitral valve development	0.0288457	1
biological_process	GO:0006857	oligopeptide transport	0.0288457	1
biological_process	GO:0008655	pyrimidine-containing compound salvage	0.0288457	1
biological_process	GO:0016264	gap junction assembly	0.0288457	1
biological_process	GO:0021670	lateral ventricle development	0.0288457	1
biological_process	GO:0031915	positive regulation of synaptic plasticity	0.0288457	1
biological_process	GO:0043097	pyrimidine nucleoside salvage	0.0288457	1
biological_process	GO:0055091	phospholipid homeostasis	0.0288457	1
biological_process	GO:0060992	response to fungicide	0.0288457	1
biological_process	GO:0070673	response to interleukin-18	0.0288457	1
biological_process	GO:0072310	glomerular epithelial cell development	0.0288457	1
biological_process	GO:0090084	negative regulation of inclusion body assembly	0.0288457	1
biological_process	GO:0090657	telomeric loop disassembly	0.0288457	1
biological_process	GO:1905146	lysosomal protein catabolic process	0.0288457	1
[truncated: 20,752 more rows]
