# Supplementary material for: Rapid Identification of Druggable Targets and the Power of the PHENotype SIMulator for Effective Drug Repurposing in COVID-19
Source: Research Square preprint supplement (doi:10.21203/rs.3.rs-287183/v1), 2021-04-14
Supplement: Supplementary file 21 [file Calu-3.xlsx]

## Sheet: MITHrIL
Pathway.Id	Pathway.Name	Impact.Factor	Probability.Pi	Probability.Network	Corrected.Accumulator	pValue	Adjusted.pValue
path:hsa04620	Toll-like receptor signaling pathway	13.1974	2.57023e-05	4.9975e-06	93.7849	1.07091e-09	8.97531e-08
path:hsa04210	Apoptosis	13.5312	2.58469e-05	4.9975e-06	51.9438	1.07704e-09	8.97531e-08
path:hsa04064	NF-kappa B signaling pathway	13.7915	9.56925e-06	4.9975e-06	48.3997	3.96888e-10	8.97531e-08
path:hsa01100	Metabolic pathways	12.6906	3.45874e-05	4.9975e-06	-309.135	1.45016e-09	9.06351e-08
path:hsa04010	MAPK signaling pathway	11.8956	9.46011e-05	4.9975e-06	100.962	4.12843e-09	2.06421e-07
path:hsa04625	C-type lectin receptor signaling pathway	10.9431	0.000312357	4.9975e-06	82.6	1.493e-08	6.22085e-07
path:hsa04060	Cytokine-cytokine receptor interaction	9.48562	0.000546285	4.9975e-06	136.055	2.77737e-08	9.91917e-07
path:hsa00280	Valine, leucine and isoleucine degradation	10.1154	0.000667181	4.9975e-06	-36.0283	3.4794e-08	1.08731e-06
path:hsa04621	NOD-like receptor signaling pathway	9.54175	0.000966646	4.9975e-06	99.7501	5.31159e-08	1.44379e-06
path:hsa04217	Necroptosis	9.37382	0.00103946	4.9975e-06	76.335	5.77515e-08	1.44379e-06
path:hsa00100	Steroid biosynthesis	10.5883	0.00149485	4.9975e-06	-45.1559	8.8145e-08	2.0033e-06
path:hsa04061	Viral protein interaction with cytokine and cytokine receptor	8.42451	0.00180557	4.9975e-06	62.0821	1.10135e-07	2.29448e-06
path:hsa04630	JAK-STAT signaling pathway	8.91235	0.00268537	4.9975e-06	158.06	1.7714e-07	3.40654e-06
path:hsa01200	Carbon metabolism	8.33785	0.00339247	4.9975e-06	-43.596	2.35478e-07	4.20496e-06
path:hsa04380	Osteoclast differentiation	8.63651	0.00372306	4.9975e-06	84.1913	2.63995e-07	4.39992e-06
path:hsa04622	RIG-I-like receptor signaling pathway	8.2054	0.00429581	4.9975e-06	53.5535	3.15159e-07	4.65455e-06
path:hsa00900	Terpenoid backbone biosynthesis	8.13566	0.00431061	4.9975e-06	-24.3207	3.16509e-07	4.65455e-06
path:hsa04623	Cytosolic DNA-sensing pathway	8.0348	0.00516346	4.9975e-06	48.901	3.96674e-07	5.50937e-06
path:hsa04668	TNF signaling pathway	8.15523	0.00798611	4.9975e-06	61.9064	6.91988e-07	9.10511e-06
path:hsa00260	Glycine, serine and threonine metabolism	12.6736	2.4576e-05	0.00949525	-12.1992	2.95954e-06	3.69942e-05
path:hsa04211	Longevity regulating pathway	8.52839	0.0310902	4.9975e-06	40.4152	4.45118e-06	5.29902e-05
path:hsa04657	IL-17 signaling pathway	14.1138	2.42612e-05	0.013993	14.6465	4.78717e-06	5.43997e-05
path:hsa04024	cAMP signaling pathway	6.53615	0.0386819	4.9975e-06	96.7762	6.14511e-06	6.67946e-05
path:hsa04923	Regulation of lipolysis in adipocytes	9.26125	0.0458171	4.9975e-06	68.4473	7.93456e-06	7.93456e-05
path:hsa04213	Longevity regulating pathway - multiple species	10.2312	0.00237733	0.00049975	34.372	7.69055e-06	7.93456e-05
path:hsa04722	Neurotrophin signaling pathway	8.17116	0.0556895	4.9975e-06	93.8161	1.07257e-05	0.000103132
path:hsa04014	Ras signaling pathway	6.32117	0.0654345	4.9975e-06	113.735	1.38433e-05	0.000128179
path:hsa04650	Natural killer cell mediated cytotoxicity	5.83533	0.0746016	4.9975e-06	80.7367	1.71107e-05	0.000152774
path:hsa00650	Butanoate metabolism	5.97751	0.0804645	4.9975e-06	-23.6777	1.9374e-05	0.000167017
path:hsa04062	Chemokine signaling pathway	7.01042	0.0852332	4.9975e-06	210.218	2.13166e-05	0.000171908
path:hsa00240	Pyrimidine metabolism	6.89976	0.00617039	0.00049975	-18.5196	2.09985e-05	0.000171908
path:hsa04662	B cell receptor signaling pathway	7.58714	0.0940931	4.9975e-06	70.2605	2.51728e-05	0.000196663
path:hsa04151	PI3K-Akt signaling pathway	5.21662	0.097975	4.9975e-06	144.85	2.69655e-05	0.000199025
path:hsa00072	Synthesis and degradation of ketone bodies	5.27247	0.0981915	4.9975e-06	-11.2759	2.70674e-05	0.000199025
path:hsa00071	Fatty acid degradation	5.27008	0.115889	4.9975e-06	-32.0792	3.60811e-05	0.000257722
path:hsa04960	Aldosterone-regulated sodium reabsorption	9.35724	0.118422	4.9975e-06	33.3469	3.74854e-05	0.000260315
path:hsa04914	Progesterone-mediated oocyte maturation	7.33805	0.122877	4.9975e-06	54.5212	4.0026e-05	0.000265393
path:hsa01212	Fatty acid metabolism	5.54914	0.123417	4.9975e-06	-40.4094	4.03397e-05	0.000265393
path:hsa04068	FoxO signaling pathway	8.11077	0.0115204	0.00049975	50.9165	4.17832e-05	0.000267841
path:hsa04015	Rap1 signaling pathway	5.86718	0.133342	4.9975e-06	114.863	4.63598e-05	0.000277797
path:hsa04926	Relaxin signaling pathway	7.11642	0.132265	4.9975e-06	107.975	4.56835e-05	0.000277797
path:hsa04917	Prolactin signaling pathway	8.87562	0.133833	4.9975e-06	95.5022	4.66699e-05	0.000277797
path:hsa00051	Fructose and mannose metabolism	4.69707	0.156236	4.9975e-06	-18.3374	6.20952e-05	0.000361018
path:hsa04973	Carbohydrate digestion and absorption	10.7803	0.159853	4.9975e-06	28.7951	6.483e-05	0.000368352
path:hsa04540	Gap junction	7.71395	0.161803	4.9975e-06	67.5002	6.63325e-05	0.000368514
path:hsa04012	ErbB signaling pathway	7.50417	0.167612	4.9975e-06	79.5775	7.09339e-05	0.000377308
path:hsa00640	Propanoate metabolism	4.80866	0.165987	4.9975e-06	-21.6578	6.96279e-05	0.000377308
path:hsa00630	Glyoxylate and dicarboxylate metabolism	6.80163	0.0203862	0.00049975	-18.9957	8.04934e-05	0.000419236
path:hsa04935	Growth hormone synthesis, secretion and action	9.17406	0.243127	4.9975e-06	152.37	0.000149691	0.00076373
path:hsa00062	Fatty acid elongation	5.8073	0.256092	4.9975e-06	-27.7	0.000167281	0.000836403
path:hsa04550	Signaling pathways regulating pluripotency of stem cells	6.53037	0.260791	4.9975e-06	70.8945	0.000173993	0.000852906
path:hsa04659	Th17 cell differentiation	5.97176	0.299563	4.9975e-06	77.417	0.000236866	0.0011175
path:hsa04066	HIF-1 signaling pathway	5.62903	0.299588	4.9975e-06	44.1455	0.00023691	0.0011175
path:hsa04660	T cell receptor signaling pathway	5.54331	0.320564	4.9975e-06	78.4265	0.000277104	0.00124525
path:hsa04664	Fc epsilon RI signaling pathway	8.31846	0.321465	4.9975e-06	68.0637	0.000278937	0.00124525
path:hsa04920	Adipocytokine signaling pathway	5.30669	0.321465	4.9975e-06	46.1803	0.000278937	0.00124525
path:hsa04723	Retrograde endocannabinoid signaling	6.39373	0.0398246	0.0009995	40.8098	0.00030786	0.00135026
path:hsa00190	Oxidative phosphorylation	4.50205	0.0498761	0.0009995	-8.1459	0.000405275	0.00174688
path:hsa00010	Glycolysis / Gluconeogenesis	7.37416	0.00527677	0.0149925	-14.9062	0.000414688	0.00175715
path:hsa04915	Estrogen signaling pathway	7.32135	0.381406	4.9975e-06	89.6658	0.000423611	0.00176505
path:hsa04910	Insulin signaling pathway	5.47259	0.39156	4.9975e-06	73.7739	0.000453122	0.00184446
path:hsa04928	Parathyroid hormone synthesis, secretion and action	7.67217	0.0147597	0.005997	38.0449	0.000457426	0.00184446
path:hsa00860	Porphyrin and chlorophyll metabolism	5.38214	0.0978317	0.00049975	-21.9503	0.000593775	0.00235625
path:hsa04725	Cholinergic synapse	6.89996	0.441986	4.9975e-06	76.004	0.000626171	0.00242713
path:hsa04924	Renin secretion	5.97096	0.102148	0.00049975	39.9124	0.000631053	0.00242713
path:hsa00020	Citrate cycle (TCA cycle)	7.94529	0.00351552	0.031984	-9.40746	0.000650494	0.00246399
path:hsa00350	Tyrosine metabolism	4.74087	0.0795787	0.0009995	-17.7933	0.000734414	0.00274035
path:hsa04658	Th1 and Th2 cell differentiation	5.85439	0.470323	4.9975e-06	68.172	0.000746245	0.00274355
path:hsa04750	Inflammatory mediator regulation of TRP channels	4.90997	0.490509	4.9975e-06	54.1121	0.000843833	0.00305737
path:hsa00330	Arginine and proline metabolism	4.56604	0.0810327	0.00149925	-17.7071	0.00101004	0.00360729
path:hsa04072	Phospholipase D signaling pathway	6.39282	0.539792	4.9975e-06	91.1413	0.00113342	0.00399092
path:hsa04672	Intestinal immune network for IgA production	5.36115	0.584663	4.9975e-06	21.61	0.00147797	0.00513184
path:hsa04810	Regulation of actin cytoskeleton	4.19196	0.598792	4.9975e-06	70.8722	0.00160667	0.0055023
path:hsa04071	Sphingolipid signaling pathway	7.17834	0.622364	4.9975e-06	90.815	0.00184751	0.00624159
path:hsa00310	Lysine degradation	4.25176	0.625762	4.9975e-06	-27.9071	0.00188521	0.00628404
path:hsa04110	Cell cycle	6.61751	0.0131938	0.035982	-17.2529	0.00223854	0.00736361
path:hsa04666	Fc gamma R-mediated phagocytosis	6.60335	0.666293	4.9975e-06	51.3679	0.00240384	0.00780467
path:hsa04370	VEGF signaling pathway	8.85294	0.687137	4.9975e-06	54.3151	0.0027297	0.00874904
path:hsa04670	Leukocyte transendothelial migration	5.45288	0.691644	4.9975e-06	75.3008	0.00280651	0.00888135
path:hsa04919	Thyroid hormone signaling pathway	7.17943	0.731981	4.9975e-06	44.4167	0.00361651	0.0113016
path:hsa04115	p53 signaling pathway	6.29169	0.0181784	0.0454773	-13.1369	0.00373428	0.011341
path:hsa00480	Glutathione metabolism	4.43475	0.102148	0.005997	-13.0986	0.00374667	0.011341
path:hsa04964	Proximal tubule bicarbonate reclamation	4.52261	0.0602142	0.0129935	4.96731	0.00376522	0.011341
path:hsa04360	Axon guidance	4.5994	0.742291	4.9975e-06	81.5736	0.00386581	0.0115054
path:hsa00380	Tryptophan metabolism	7.17571	0.0051283	0.116442	-6.74642	0.00392172	0.0115345
path:hsa04150	mTOR signaling pathway	5.76123	0.104221	0.00749625	37.5712	0.00453342	0.0131786
path:hsa04022	cGMP-PKG signaling pathway	4.4001	0.278558	0.0009995	47.8325	0.00465584	0.0132316
path:hsa00620	Pyruvate metabolism	5.81105	0.0315354	0.0344828	-9.58794	0.00465751	0.0132316
path:hsa04510	Focal adhesion	4.46542	0.780376	4.9975e-06	84.3212	0.00498932	0.0140149
path:hsa00052	Galactose metabolism	4.32064	0.228436	0.0029985	-12.6967	0.0067711	0.0188086
path:hsa04727	GABAergic synapse	5.52952	0.858265	4.9975e-06	36.6232	0.00901315	0.0244922
path:hsa04144	Endocytosis	4.82411	0.157144	0.0109945	15.3107	0.00987127	0.0265357
path:hsa00510	N-Glycan biosynthesis	4.47067	0.237479	0.005997	-29.262	0.0112547	0.0299326
path:hsa00410	beta-Alanine metabolism	4.16491	0.344456	0.00249875	-11.6694	0.0116627	0.0306912
path:hsa04218	Cellular senescence	6.04106	0.0873581	0.0329835	27.2104	0.0119166	0.0310327
path:hsa00520	Amino sugar and nucleotide sugar metabolism	3.29432	0.414665	0.00149925	-20.9303	0.0121915	0.0314214
path:hsa00061	Fatty acid biosynthesis	4.49766	0.49597	0.0009995	-13.4759	0.0141763	0.0361641
path:hsa04918	Thyroid hormone synthesis	4.71457	0.200215	0.0124938	19.0053	0.0146428	0.0369767
path:hsa04390	Hippo signaling pathway	3.95397	0.154146	0.0214893	-25.8092	0.0157169	0.0392923
path:hsa04611	Platelet activation	6.34582	0.62354	0.00049975	62.1979	0.0176778	0.0433279
path:hsa04971	Gastric acid secretion	5.77792	0.543343	0.0009995	40.5902	0.0175046	0.0433279
path:hsa04610	Complement and coagulation cascades	6.20103	0.010934	0.254873	-3.60813	0.0184305	0.0447343
path:hsa04724	Glutamatergic synapse	5.74327	0.932166	4.9975e-06	46.5546	0.0193012	0.0463972
path:hsa00230	Purine metabolism	4.39402	0.118808	0.0424788	-18.2947	0.0200293	0.0476887
path:hsa04925	Aldosterone synthesis and secretion	5.11879	0.103345	0.053973	17.193	0.0212014	0.0500032
path:hsa04912	GnRH signaling pathway	6.13165	0.420462	0.00449775	42.3745	0.0233481	0.0541778
path:hsa00590	Arachidonic acid metabolism	4.4303	0.087325	0.0729635	-7.02605	0.0234048	0.0541778
path:hsa04921	Oxytocin signaling pathway	4.64014	0.570894	0.00149925	51.0899	0.0242882	0.0555443
path:hsa00290	Valine, leucine and isoleucine biosynthesis	3.14207	0.24211	0.0184908	4.28861	0.0244395	0.0555443
path:hsa03320	PPAR signaling pathway	2.67016	0.565509	0.001999	-12.8637	0.027515	0.0619706
path:hsa00472	D-Arginine and D-ornithine metabolism	0	1	0.029985	-0.0998752	0.029985	0.0669308
path:hsa00360	Phenylalanine metabolism	3.14837	0.199907	0.0354823	-3.57113	0.030591	0.0676793
path:hsa04726	Serotonergic synapse	6.01419	0.746832	0.00049975	49.0459	0.0316597	0.0694292
path:hsa00561	Glycerolipid metabolism	3.58277	0.625762	0.001999	-15.3021	0.0352608	0.0766539
path:hsa01210	2-Oxocarboxylic acid metabolism	6.36086	0.0306751	0.248876	3.19952	0.0357403	0.0770265
path:hsa04270	Vascular smooth muscle contraction	3.72109	0.261287	0.0289855	23.3402	0.0365082	0.078009
path:hsa04392	Hippo signaling pathway - multiple species	3.11736	0.265686	0.0294853	-9.27965	0.0377104	0.079895
path:hsa01230	Biosynthesis of amino acids	8.68653	0.00209874	0.643678	-3.38773	0.0388692	0.0816579
path:hsa04913	Ovarian steroidogenesis	4.82496	0.304519	0.0244878	11.0571	0.0397322	0.0822416
path:hsa00970	Aminoacyl-tRNA biosynthesis	6.03931	0.0677905	0.161919	7.02648	0.0398049	0.0822416
path:hsa04020	Calcium signaling pathway	3.01517	0.795947	0.00049975	39.5768	0.040762	0.0835286
path:hsa04330	Notch signaling pathway	4.21513	0.216467	0.0489755	-11.892	0.0422936	0.0859627
path:hsa04152	AMPK signaling pathway	5.00623	0.260193	0.041979	19.7344	0.0468208	0.0943968
path:hsa00983	Drug metabolism - other enzymes	2.51985	0.493793	0.009995	-11.0656	0.0488497	0.0976994
path:hsa04962	Vasopressin-regulated water reabsorption	5.78742	0.434522	0.0154923	10.7308	0.0502946	0.0997909
path:hsa04916	Melanogenesis	5.89044	0.636631	0.003998	36.9447	0.0517302	0.101442
path:hsa00030	Pentose phosphate pathway	3.38022	0.428684	0.0169915	-12.7071	0.0519381	0.101442
path:hsa04371	Apelin signaling pathway	4.7358	0.586189	0.005997	41.0018	0.0523476	0.101449
path:hsa04140	Autophagy - animal	6.05701	0.643784	0.003998	46.3484	0.053179	0.102267
path:hsa00790	Folate biosynthesis	5.03142	0.478827	0.0134933	-11.8084	0.0546371	0.104269
path:hsa04713	Circadian entrainment	4.62448	0.67466	0.00349825	36.0178	0.0562694	0.106571
path:hsa00232	Caffeine metabolism	2.83396	0.24211	0.0694653	1.42874	0.0616572	0.115897
path:hsa04970	Salivary secretion	4.67068	0.382066	0.0304848	19.2012	0.0621355	0.115925
path:hsa00592	alpha-Linolenic acid metabolism	2.70458	0.327991	0.047976	-3.57798	0.0678251	0.125602
path:hsa00563	Glycosylphosphatidylinositol (GPI)-anchor biosynthesis	3.61053	0.431632	0.0274863	-12.9321	0.0695992	0.12794
path:hsa01040	Biosynthesis of unsaturated fatty acids	3.84463	0.366529	0.041979	-4.87616	0.071711	0.130859
path:hsa00053	Ascorbate and aldarate metabolism	2.9621	0.772207	0.00249875	-6.22306	0.0725043	0.131348
path:hsa04730	Long-term depression	10.0624	0.858265	0.0009995	41.0736	0.0768163	0.137172
path:hsa04122	Sulfur relay system	2.8304	0.292514	0.069965	-1.34455	0.0763806	0.137172
path:hsa04514	Cell adhesion molecules (CAMs)	2.16424	0.59165	0.0129935	13.239	0.0792099	0.139454
path:hsa04710	Circadian rhythm	3.25973	0.385021	0.043978	-7.20739	0.0787951	0.139454
path:hsa04728	Dopaminergic synapse	4.98469	0.866959	0.0009995	41.9845	0.0809316	0.141489
path:hsa00785	Lipoic acid metabolism	3.56531	0.24211	0.104448	-2.21487	0.0833018	0.144621
path:hsa04714	Thermogenesis	5.2686	0.755419	0.00449775	28.3266	0.0872226	0.150384
path:hsa00601	Glycosphingolipid biosynthesis - lacto and neolacto series	3.19727	0.524763	0.0274863	12.2212	0.0945772	0.161947
path:hsa00250	Alanine, aspartate and glutamate metabolism	5.4804	0.0337539	0.541729	-0.667496	0.111481	0.189594
path:hsa00780	Biotin metabolism	4.16286	0.558085	0.0334833	-2.08343	0.116625	0.197002
path:hsa04261	Adrenergic signaling in cardiomyocytes	4.32378	0.912368	0.00149925	48.789	0.127113	0.210452
path:hsa04961	Endocrine and other factor-regulated calcium reabsorption	6.90931	0.668964	0.01999	19.4026	0.126452	0.210452
path:hsa04979	Cholesterol metabolism	3.50709	0.173458	0.248376	-1.45821	0.12597	0.210452
path:hsa00750	Vitamin B6 metabolism	4.55998	0.151316	0.291354	-1.09792	0.131912	0.216961
path:hsa04976	Bile secretion	5.4998	0.805457	0.007996	12.7887	0.136873	0.223649
path:hsa04966	Collecting duct acid secretion	0	1	0.13943	-2.02591	0.13943	0.226348
path:hsa04922	Glucagon signaling pathway	4.47598	0.164836	0.30035	5.60135	0.144717	0.23044
path:hsa00730	Thiamine metabolism	2.99765	0.376508	0.117441	-2.26689	0.144014	0.23044
path:hsa00512	Mucin type O-glycan biosynthesis	4.21866	0.0869547	0.441779	0.792114	0.143427	0.23044
path:hsa04350	TGF-beta signaling pathway	3.94807	0.201738	0.264368	-5.80169	0.150061	0.237439
path:hsa04740	Olfactory transduction	3.221	0.384054	0.135932	7.80618	0.162202	0.255035
path:hsa00524	Neomycin, kanamycin and gentamicin biosynthesis	3.59325	0.66341	0.035982	-1.60225	0.165008	0.257825
path:hsa04070	Phosphatidylinositol signaling system	6.05167	0.764748	0.0209895	26.5352	0.176762	0.274476
path:hsa04530	Tight junction	5.02275	0.0811446	0.538731	-1.1849	0.178953	0.276161
path:hsa04927	Cortisol synthesis and secretion	4.86381	0.286808	0.234383	7.50216	0.181358	0.278156
path:hsa00440	Phosphonate and phosphinate metabolism	2.44707	0.743637	0.0269865	-2.30308	0.184124	0.280676
path:hsa00500	Starch and sucrose metabolism	2.984	0.777539	0.0214893	-9.08112	0.186475	0.282538
path:hsa00450	Selenocompound metabolism	3.68668	0.224868	0.311844	2.17162	0.189051	0.284716
path:hsa03018	RNA degradation	2.34432	0.631046	0.0604698	-1.96797	0.194896	0.29176
path:hsa04612	Antigen processing and presentation	2.60205	0.625762	0.0644678	-5.1285	0.198532	0.295435
path:hsa04614	Renin-angiotensin system	3.41825	0.14327	0.454273	0.0757924	0.201909	0.298682
path:hsa04080	Neuroactive ligand-receptor interaction	1.84779	0.825105	0.0174913	-19.3661	0.203316	0.298972
path:hsa04744	Phototransduction	3.72854	0.434522	0.15942	-5.52121	0.205693	0.298972
path:hsa04145	Phagosome	3.46038	0.107554	0.530735	-0.133138	0.20553	0.298972
path:hsa04340	Hedgehog signaling pathway	3.91908	0.206481	0.369815	1.4933	0.207849	0.30036
path:hsa00220	Arginine biosynthesis	4.37951	0.48659	0.137931	-4.62816	0.213516	0.305023
path:hsa03460	Fanconi anemia pathway	4.02203	0.192833	0.396802	-1.47425	0.212313	0.305023
path:hsa04137	Mitophagy - animal	6.45006	0.349199	0.236382	7.20098	0.217199	0.308521
path:hsa04114	Oocyte meiosis	2.92851	0.582429	0.0984508	-13.9187	0.222042	0.309564
path:hsa04911	Insulin secretion	4.32043	0.511838	0.133933	12.2479	0.222886	0.309564
path:hsa04141	Protein processing in endoplasmic reticulum	4.13362	0.237479	0.355322	-2.33302	0.221388	0.309564
path:hsa04977	Vitamin digestion and absorption	0	1	0.21939	-0.760349	0.21939	0.309564
path:hsa04721	Synaptic vesicle cycle	2.29774	0.434522	0.188906	-4.2881	0.229588	0.31711
path:hsa00980	Metabolism of xenobiotics by cytochrome P450	2.30059	0.505368	0.150925	5.19038	0.235591	0.323614
path:hsa00532	Glycosaminoglycan biosynthesis - chondroitin sulfate / dermatan sulfate	3.29911	0.315258	0.316342	1.45097	0.248859	0.339972
path:hsa00760	Nicotinate and nicotinamide metabolism	3.65837	0.595595	0.118941	-6.92113	0.253503	0.344434
path:hsa00670	One carbon pool by folate	4.06176	0.0864224	0.673663	-1.63233	0.259257	0.35028
path:hsa04215	Apoptosis - multiple species	4.03307	0.204676	0.467266	0.447181	0.260608	0.35028
path:hsa04975	Fat digestion and absorption	5.26929	0.66341	0.129935	-2.07419	0.309084	0.413214
path:hsa04720	Long-term potentiation	4.68472	0.639654	0.149925	10.8226	0.315513	0.417346
path:hsa00591	Linoleic acid metabolism	2.41157	0.434522	0.303348	1.48109	0.315402	0.417346
path:hsa04512	ECM-receptor interaction	2.32352	0.809265	0.0714643	9.62626	0.338325	0.445165
path:hsa04310	Wnt signaling pathway	3.66589	0.523876	0.271364	8.0807	0.348984	0.456785
path:hsa00120	Primary bile acid biosynthesis	3.63625	0.437164	0.357821	2.1995	0.355904	0.463416
path:hsa00140	Steroid hormone biosynthesis	4.01233	0.157825	0.694153	-3.26237	0.362956	0.47015
path:hsa00562	Inositol phosphate metabolism	5.41342	0.669925	0.18041	10.5352	0.368723	0.475158
path:hsa00471	D-Glutamine and D-glutamate metabolism	4.7648	0.66341	0.187406	-1.72184	0.370962	0.475593
path:hsa00604	Glycosphingolipid biosynthesis - ganglio series	2.93077	0.437164	0.411794	0.967843	0.393782	0.502273
path:hsa00040	Pentose and glucuronate interconversions	3.34666	0.984396	0.00649675	-7.89381	0.407876	0.514995
path:hsa04742	Taste transduction	3.19792	0.611045	0.269365	4.52928	0.407008	0.514995
path:hsa00603	Glycosphingolipid biosynthesis - globo and isoglobo series	2.46731	0.437164	0.44078	0.38306	0.414029	0.520137
path:hsa00740	Riboflavin metabolism	0	1	0.41929	0.43189	0.41929	0.524113
path:hsa04216	Ferroptosis	7.58693	0.772207	0.152424	-4.68184	0.421538	0.5243
path:hsa00565	Ether lipid metabolism	2.69168	0.702371	0.217391	4.21654	0.429897	0.52943
path:hsa00534	Glycosaminoglycan biosynthesis - heparan sulfate / heparin	4.78821	0.66341	0.248876	2.27607	0.428108	0.52943
path:hsa00270	Cysteine and methionine metabolism	3.87527	0.317903	0.615192	-2.15779	0.449166	0.550448
path:hsa00770	Pantothenate and CoA biosynthesis	3.18914	0.604457	0.363818	1.97377	0.476495	0.581091
path:hsa00515	Mannose type O-glycan biosynthesis	4.07111	0.922984	0.0764618	-4.80543	0.498915	0.605479
path:hsa04978	Mineral absorption	2.69793	0.584663	0.525237	-0.306273	0.577683	0.697684
path:hsa00564	Glycerophospholipid metabolism	3.06572	0.322455	0.785607	-6.53356	0.592371	0.707033
path:hsa00130	Ubiquinone and other terpenoid-quinone biosynthesis	3.78407	0.93431	0.117941	-3.79493	0.590424	0.707033
path:hsa00340	Histidine metabolism	2.95248	0.48659	0.644178	-1.41557	0.593908	0.707033
path:hsa04972	Pancreatic secretion	7.97449	0.985017	0.0434783	16.1004	0.627208	0.743137
path:hsa00920	Sulfur metabolism	3.56121	0.913745	0.186407	-2.6742	0.630975	0.744074
path:hsa03013	RNA transport	2.08805	0.999663	0.001999	-9.20153	0.643908	0.755761
path:hsa04260	Cardiac muscle contraction	7.32271	0.983176	0.0884558	-7.16624	0.7079	0.826986
path:hsa00400	Phenylalanine, tyrosine and tryptophan biosynthesis	2.43528	0.743637	0.563718	-0.243491	0.717791	0.834641
path:hsa00513	Various types of N-glycan biosynthesis	2.85883	0.938295	0.273363	-3.34985	0.746408	0.863898
path:hsa00910	Nitrogen metabolism	4.15953	0.970988	0.218891	-2.42825	0.785719	0.905206
path:hsa03440	Homologous recombination	12.89	0.961903	0.27936	-1.49351	0.799649	0.917029
path:hsa00830	Retinol metabolism	1.82105	0.6563	0.791104	-3.44949	0.804407	0.918273
path:hsa00982	Drug metabolism - cytochrome P450	1.81362	0.806897	0.647176	-1.26801	0.810517	0.921042
path:hsa00430	Taurine and hypotaurine metabolism	2.92252	0.913745	0.546727	-0.149095	0.852596	0.964475
path:hsa04130	SNARE interactions in vesicular transport	1.27059	0.957793	0.46027	0.191932	0.87486	0.985203
path:hsa00531	Glycosaminoglycan degradation	2.69883	0.987189	0.312344	-2.56038	0.891073	0.998961
path:hsa04136	Autophagy - other	18.8135	0.997503	0.276362	3.76679	0.941252	1
path:hsa00600	Sphingolipid metabolism	3.02054	0.980325	0.603198	-1.74291	0.949705	1
path:hsa04520	Adherens junction	9.61181	0.97499	0.441779	1.37974	0.900117	1
path:hsa03015	mRNA surveillance pathway	1.76583	0.999751	0.495252	-0.0224184	0.992923	1
path:hsa02010	ABC transporters	0	1	1	0	1	1
path:hsa00514	Other types of O-glycan biosynthesis	0	1	1	0	1	1
path:hsa00511	Other glycan degradation	0	1	1	0	1	1
remaining	remaining	1	1	1	0	1	1
path:hsa03450	Non-homologous end-joining	0	1	1	0	1	1
path:hsa03420	Nucleotide excision repair	0	1	1	0	1	1
path:hsa04640	Hematopoietic cell lineage	0	1	1	0	1	1
path:hsa03430	Mismatch repair	0	1	1	0	1	1
path:hsa04974	Protein digestion and absorption	0	1	1	0	1	1
path:hsa03410	Base excision repair	0	1	1	0	1	1
path:hsa03060	Protein export	0	1	1	0	1	1
path:hsa03040	Spliceosome	0	1	1	0	1	1
path:hsa03050	Proteasome	0	1	1	0	1	1
path:hsa04146	Peroxisome	0	1	1	0	1	1
path:hsa04142	Lysosome	0	1	1	0	1	1
path:hsa03020	RNA polymerase	0	1	1	0	1	1
path:hsa03022	Basal transcription factors	0	1	1	0	1	1
path:hsa03030	DNA replication	0	1	1	0	1	1
path:hsa04120	Ubiquitin mediated proteolysis	0	1	1	0	1	1
path:hsa04929	GnRH secretion	0	1	1	0	1	1
path:hsa00533	Glycosaminoglycan biosynthesis - keratan sulfate	0	1	1	0	1	1
path:hsa03008	Ribosome biogenesis in eukaryotes	0	1	1	0	1	1
path:hsa03010	Ribosome	0	1	1	0	1	1

## Sheet: SPIA
Name	ID	pSize	NDE	pNDE	tA	pPERT	pG	pGFdr	pGFWER	Status
Herpes simplex infection	05168	161	65	2.15901e-06	68.0087	5e-06	2.83391e-10	3.88246e-08	3.88246e-08	Activated
Cytokine-cytokine receptor interaction	04060	202	72	9.75657e-05	154.794	5e-06	1.09474e-08	7.49896e-07	1.49979e-06	Activated
MAPK signaling pathway	04010	234	77	0.000952335	73.3256	5e-06	9.6008e-08	3.35366e-06	1.31531e-05	Activated
Influenza A	05164	151	63	8.10224e-07	36.4799	0.006	9.7917e-08	3.35366e-06	1.34146e-05	Activated
Tuberculosis	05152	162	56	0.00126797	84.2212	5e-06	1.26013e-07	3.45276e-06	1.72638e-05	Activated
NF-kappa B signaling pathway	04064	85	38	1.85507e-05	56.6824	0.002	6.71893e-07	1.53416e-05	9.20494e-05	Activated
Pertussis	05133	69	33	1.15397e-05	36.6213	0.005	1.01942e-06	1.99515e-05	0.00013966	Activated
Measles	05162	116	50	3.52163e-06	27.6379	0.031	1.85922e-06	3.18391e-05	0.000254712	Activated
Chemokine signaling pathway	04062	160	47	0.0615919	115.764	5e-06	4.92528e-06	7.49738e-05	0.000674764	Activated
Apoptosis	04210	80	31	0.00204628	71.4093	0.001	2.88515e-05	0.000361626	0.00395265	Activated
Amyotrophic lateral sclerosis (ALS)	05014	50	13	0.412069	42.0978	5e-06	2.90357e-05	0.000361626	0.00397789	Activated
Parkinson's disease	05012	97	43	7.00837e-06	-6.68452	0.412	3.97173e-05	0.0004227	0.00544126	Inhibited
Toll-like receptor signaling pathway	04620	87	37	8.84323e-05	39.1987	0.033	4.01102e-05	0.0004227	0.00549509	Activated
Hepatitis C	05160	114	42	0.00122389	33.2198	0.003	4.96222e-05	0.000473748	0.00679824	Activated
Huntington's disease	05016	158	63	5.00214e-06	-1.08891	0.77	5.18702e-05	0.000473748	0.00710622	Inhibited
Osteoclast differentiation	04380	127	43	0.00661579	48.7678	0.001	8.55161e-05	0.000732231	0.0117157	Activated
HTLV-I infection	05166	245	84	0.000127826	31.1526	0.067	0.000108493	0.000845277	0.0148635	Activated
Cytosolic DNA-sensing pathway	04623	49	23	0.000337866	11.9554	0.026	0.000111058	0.000845277	0.015215	Activated
Chagas disease (American trypanosomiasis)	05142	98	35	0.00533413	39.1495	0.011	0.000630379	0.00454536	0.0863619	Activated
Legionellosis	05134	53	25	0.000171446	-3.58463	0.624	0.0010851	0.00743295	0.148659	Inhibited
Pathways in cancer	05200	296	87	0.0154125	81.5878	0.015	0.00216676	0.013915	0.296846	Activated
Alzheimer's disease	05010	142	52	0.000409758	-3.94009	0.584	0.00223452	0.013915	0.30613	Inhibited
Viral carcinogenesis	05203	189	66	0.000361145	-0.175926	0.903	0.00294424	0.0175374	0.403361	Inhibited
African trypanosomiasis	05143	32	13	0.0259811	9.51755	0.014	0.00324419	0.0185189	0.444454	Activated
Cocaine addiction	05030	43	19	0.00262306	7.50707	0.248	0.00542385	0.0297227	0.743068	Activated
RIG-I-like receptor signaling pathway	04622	55	22	0.0055748	11.9723	0.126	0.00580271	0.0305758	0.794972	Activated
NOD-like receptor signaling pathway	04621	54	23	0.00177905	4.77029	0.575	0.00806606	0.0409278	1	Activated
Adipocytokine signaling pathway	04920	61	15	0.493793	22.7284	0.003	0.0111322	0.0544685	1	Activated
Rheumatoid arthritis	05323	83	32	0.00192519	0.614284	0.825	0.0118249	0.0558625	1	Activated
Antigen processing and presentation	04612	59	17	0.223966	10.0909	0.009	0.0145267	0.0663386	1	Activated
Epstein-Barr virus infection	05169	193	63	0.00323288	4.16828	0.663	0.0153153	0.0670821	1	Activated
B cell receptor signaling pathway	04662	73	25	0.0285849	25.7606	0.077	0.0156688	0.0670821	1	Activated
Jak-STAT signaling pathway	04630	121	42	0.00441216	1.03621	0.821	0.0239825	0.0995635	1	Activated
Leishmaniasis	05140	68	25	0.0113538	7.53985	0.379	0.0277481	0.111809	1	Activated
Gastric acid secretion	04971	62	16	0.40467	-9.06496	0.013	0.0328662	0.128648	1	Inhibited
Natural killer cell mediated cytotoxicity	04650	107	31	0.128323	64.7882	0.043	0.0342096	0.129935	1	Activated
Small cell lung cancer	05222	82	26	0.0639112	24.6533	0.089	0.035092	0.129935	1	Activated
Pathogenic Escherichia coli infection	05130	52	15	0.241277	-20.2246	0.025	0.0368592	0.132887	1	Inhibited
Cell cycle	04110	121	40	0.0131938	8.62059	0.54	0.0423502	0.148769	1	Activated
Amphetamine addiction	05031	62	21	0.0474488	-8.99051	0.17	0.0469464	0.160791	1	Inhibited
Chronic myeloid leukemia	05220	73	26	0.0155144	7.00937	0.542	0.0485902	0.162362	1	Activated
Pancreatic secretion	04972	72	11	0.972567	-4.00273	0.009	0.0502283	0.16384	1	Inhibited
Transcriptional misregulation in cancer	05202	155	50	0.0102556	0	1	0.0572257	0.182324	1	Inhibited
Melanoma	05218	60	20	0.060844	26.2168	0.195	0.0644744	0.20075	1	Activated
Pancreatic cancer	05212	69	23	0.0467946	12.7939	0.263	0.066428	0.202236	1	Activated
Malaria	05144	45	16	0.0514342	2.57847	0.257	0.070404	0.209681	1	Activated
p53 signaling pathway	04115	64	23	0.0196782	-2.12541	0.69	0.0719537	0.209737	1	Inhibited
Dorso-ventral axis formation	04320	22	9	0.057062	1.49565	0.278	0.0815965	0.23289	1	Activated
Staphylococcus aureus infection	05150	48	14	0.237479	17.2457	0.078	0.0924079	0.258365	1	Activated
Complement and coagulation cascades	04610	58	21	0.0230584	2.80749	0.879	0.0992884	0.27205	1	Activated
Prostate cancer	05215	86	29	0.0240667	0.118808	0.994	0.113223	0.304148	1	Activated
Acute myeloid leukemia	05221	57	17	0.180389	11.0065	0.141	0.118823	0.311671	1	Activated
Amoebiasis	05146	98	31	0.0477219	3.69944	0.543	0.120573	0.311671	1	Activated
ECM-receptor interaction	04512	79	15	0.875738	11.7091	0.031	0.125056	0.317271	1	Activated
Progesterone-mediated oocyte maturation	04914	80	22	0.256496	-8.9673	0.114	0.132524	0.330106	1	Inhibited
Epithelial cell signaling in Helicobacter pylori infection	05120	65	21	0.07515	5.74336	0.455	0.14962	0.362763	1	Activated
Prion diseases	05020	30	12	0.0360229	0.236998	0.96	0.15093	0.362763	1	Activated
Hedgehog signaling pathway	04340	47	15	0.130131	7.23404	0.276	0.155394	0.36705	1	Activated
Systemic lupus erythematosus	05322	106	26	0.470185	8.00567	0.08	0.161005	0.370386	1	Activated
Circadian rhythm - mammal	04710	22	6	0.431632	-7.9476	0.088	0.162213	0.370386	1	Inhibited
Toxoplasmosis	05145	121	37	0.0531085	3.2595	0.735	0.165636	0.372003	1	Activated
Shigellosis	05131	59	11	0.863549	15.5237	0.047	0.17064	0.372204	1	Activated
Neurotrophin signaling pathway	04722	117	36	0.0513861	4.13966	0.793	0.17116	0.372204	1	Activated
Fanconi anemia pathway	03460	46	14	0.187504	-2.71316	0.234	0.181049	0.387558	1	Inhibited
Maturity onset diabetes of the young	04950	16	1	0.987189	-3.22402	0.051	0.200824	0.422345	1	Inhibited
Leukocyte transendothelial migration	04670	104	23	0.695737	26.8526	0.075	0.206271	0.422345	1	Activated
Gap junction	04540	76	22	0.179021	14.4863	0.292	0.206548	0.422345	1	Activated
Calcium signaling pathway	04020	151	33	0.74504	17.0659	0.078	0.223466	0.435076	1	Activated
Vibrio cholerae infection	05110	51	15	0.216467	-1.99442	0.279	0.229913	0.435076	1	Inhibited
Bladder cancer	05219	40	14	0.0741848	1.90635	0.818	0.230723	0.435076	1	Activated
ErbB signaling pathway	04012	86	24	0.21999	20.1204	0.277	0.231434	0.435076	1	Activated
Sulfur relay system	04122	10	4	0.197383	-2.19512	0.309	0.231586	0.435076	1	Inhibited
Type II diabetes mellitus	04930	41	13	0.157825	-6.81593	0.387	0.231829	0.435076	1	Inhibited
mTOR signaling pathway	04150	61	18	0.184518	3.47188	0.367	0.250042	0.462916	1	Activated
GnRH signaling pathway	04912	85	22	0.367903	24.4406	0.197	0.262692	0.47985	1	Activated
Salmonella infection	05132	79	24	0.10977	-2.37687	0.749	0.287629	0.51849	1	Inhibited
Axon guidance	04360	122	25	0.835151	15.8481	0.101	0.29293	0.521187	1	Activated
Intestinal immune network for IgA production	04672	37	7	0.812834	3.80899	0.108	0.301357	0.529306	1	Activated
Wnt signaling pathway	04310	138	34	0.444151	-11.0384	0.211	0.315587	0.542397	1	Inhibited
Colorectal cancer	05210	61	16	0.376794	5.76088	0.25	0.316728	0.542397	1	Activated
Lysosome	04142	118	24	0.841881	-0.797402	0.117	0.326794	0.551456	1	Inhibited
Fc epsilon RI signaling pathway	04664	67	19	0.229695	11.2463	0.435	0.330069	0.551456	1	Activated
Glioma	05214	65	19	0.188206	-9.0247	0.548	0.337432	0.55167	1	Inhibited
T cell receptor signaling pathway	04660	102	26	0.383322	14.1921	0.27	0.33825	0.55167	1	Activated
Alcoholism	05034	149	40	0.218174	12.6832	0.499	0.350298	0.564598	1	Activated
Mineral absorption	04978	45	11	0.518879	0.669829	0.217	0.358501	0.571101	1	Activated
Protein processing in endoplasmic reticulum	04141	155	43	0.146171	1.41706	0.788	0.36412	0.573384	1	Activated
Taste transduction	04742	24	4	0.858329	5.0941	0.145	0.383801	0.597509	1	Activated
Viral myocarditis	05416	61	10	0.94054	6.59364	0.145	0.408088	0.623874	1	Activated
Morphine addiction	05032	68	15	0.679511	-4.22578	0.202	0.409844	0.623874	1	Inhibited
Olfactory transduction	04740	31	8	0.466228	4.82741	0.315	0.428581	0.645227	1	Activated
Aldosterone-regulated sodium reabsorption	04960	34	9	0.422879	3.09436	0.363	0.441177	0.65697	1	Activated
Bile secretion	04976	54	13	0.535752	-1.44452	0.292	0.446649	0.657966	1	Inhibited
Carbohydrate digestion and absorption	04973	32	10	0.213904	0.666548	0.818	0.479973	0.699535	1	Activated
Focal adhesion	04510	192	40	0.857231	24.2884	0.213	0.493087	0.711083	1	Activated
Neuroactive ligand-receptor interaction	04080	166	36	0.769051	2.65241	0.258	0.519331	0.741128	1	Activated
Non-small cell lung cancer	05223	53	15	0.267142	4.2205	0.76	0.526739	0.741687	1	Activated
Regulation of actin cytoskeleton	04810	190	46	0.478852	13.6717	0.429	0.53055	0.741687	1	Activated
Notch signaling pathway	04330	45	13	0.26082	1.87353	0.857	0.558415	0.761713	1	Activated
Fc gamma R-mediated phagocytosis	04666	89	19	0.746487	12.0838	0.3	0.559048	0.761713	1	Activated
Endometrial cancer	05213	51	12	0.574111	9.53566	0.393	0.561555	0.761713	1	Activated
TGF-beta signaling pathway	04350	79	21	0.322237	-3.35458	0.717	0.569557	0.763912	1	Inhibited
Dilated cardiomyopathy	05414	77	13	0.946315	-1.37886	0.251	0.578963	0.763912	1	Inhibited
Long-term potentiation	04720	64	15	0.577629	-10.5147	0.42	0.58621	0.763912	1	Inhibited
Renal cell carcinoma	05211	65	18	0.273293	1.07357	0.888	0.586324	0.763912	1	Activated
Oocyte meiosis	04114	100	21	0.781088	11.1032	0.315	0.591056	0.763912	1	Activated
Long-term depression	04730	54	10	0.860775	8.49849	0.296	0.603168	0.77228	1	Activated
GABAergic synapse	04727	66	10	0.969677	-2.73753	0.278	0.622957	0.779611	1	Inhibited
Thyroid cancer	05216	27	5	0.806359	4.35725	0.337	0.625796	0.779611	1	Activated
Phosphatidylinositol signaling system	04070	79	18	0.629335	-0.553322	0.432	0.625965	0.779611	1	Inhibited
Insulin signaling pathway	04910	127	31	0.473101	-11.3371	0.618	0.651916	0.804617	1	Inhibited
Basal cell carcinoma	05217	49	13	0.380861	-3.06965	0.787	0.660876	0.808393	1	Inhibited
Phototransduction	04744	20	6	0.335875	0.564565	0.909	0.667538	0.809316	1	Activated
Endocrine and other factor-regulated calcium reabsorption	04961	43	9	0.727662	2.68245	0.476	0.713605	0.857578	1	Activated
Glutamatergic synapse	04724	93	18	0.874001	-3.31311	0.425	0.739313	0.880746	1	Inhibited
Vascular smooth muscle contraction	04270	96	23	0.527733	-3.65183	0.721	0.748161	0.883604	1	Inhibited
RNA degradation	03018	62	16	0.40467	0	1	0.770768	0.895961	1	Inhibited
Cholinergic synapse	04725	95	24	0.409803	0.138956	0.99	0.771703	0.895961	1	Activated
Salivary secretion	04970	66	16	0.516155	-0.768544	0.815	0.784928	0.901121	1	Inhibited
Graft-versus-host disease	05332	30	8	0.425755	0	1	0.789303	0.901121	1	Inhibited
VEGF signaling pathway	04370	66	14	0.735476	4.6137	0.631	0.820358	0.921188	1	Activated
Retrograde endocannabinoid signaling	04723	74	10	0.99062	0.274321	0.475	0.825271	0.921188	1	Activated
Serotonergic synapse	04726	89	18	0.821815	-2.55228	0.576	0.827389	0.921188	1	Inhibited
Type I diabetes mellitus	04940	36	9	0.498437	0	1	0.845488	0.921188	1	Inhibited
RNA transport	03013	140	19	0.999144	-0.267271	0.501	0.846969	0.921188	1	Inhibited
Bacterial invasion of epithelial cells	05100	68	9	0.989999	7.15703	0.506	0.847224	0.921188	1	Activated
Dopaminergic synapse	04728	115	24	0.803037	1.66422	0.696	0.884067	0.944354	1	Activated
PPAR signaling pathway	03320	55	13	0.565509	0	1	0.887866	0.944354	1	Inhibited
Melanogenesis	04916	88	20	0.636631	2.85477	0.892	0.889209	0.944354	1	Activated
Vasopressin-regulated water reabsorption	04962	40	9	0.638443	0.231321	0.928	0.902604	0.946751	1	Activated
Tight junction	04530	110	21	0.902785	-2.25176	0.662	0.905287	0.946751	1	Inhibited
SNARE interactions in vesicular transport	04130	36	7	0.788672	0.631762	0.854	0.939723	0.975318	1	Activated
Allograft rejection	05330	30	6	0.753889	0	1	0.96687	0.995949	1	Inhibited
Arrhythmogenic right ventricular cardiomyopathy (ARVC)	05412	66	11	0.939913	0	1	0.998157	0.999997	1	Inhibited
Autoimmune thyroid disease	05320	32	4	0.965269	0	1	0.99939	0.999997	1	Inhibited
Asthma	05310	21	2	0.975143	0	1	0.999688	0.999997	1	Inhibited
Regulation of autophagy	04140	22	1	0.997503	0	1	0.999997	0.999997	1	Inhibited

## Sheet: Reactome
ID	Description	setSize	enrichmentScore	NES	pvalue	p.adjust	qvalues
R-HSA-168249	Innate Immune System	252	0.341311	1.6224	0.001001	0.0442696	0.0324717
R-HSA-1280215	Cytokine Signaling in Immune system	282	0.587202	2.80676	0.001001	0.0442696	0.0324717
R-HSA-449147	Signaling by Interleukins	147	0.550604	2.54497	0.00100705	0.0442696	0.0324717
R-HSA-913531	Interferon Signaling	81	0.668083	2.88595	0.00105263	0.0442696	0.0324717
R-HSA-500792	GPCR ligand binding	72	0.479438	2.04419	0.00105708	0.0442696	0.0324717
R-HSA-373076	Class A/1 (Rhodopsin-like receptors)	54	0.529687	2.16694	0.00108578	0.0442696	0.0324717
R-HSA-6785807	Interleukin-4 and Interleukin-13 signaling	41	0.618933	2.41415	0.00111359	0.0442696	0.0324717
R-HSA-909733	Interferon alpha/beta signaling	41	0.72793	2.83929	0.00111359	0.0442696	0.0324717
R-HSA-877300	Interferon gamma signaling	42	0.645223	2.52814	0.00111607	0.0442696	0.0324717
R-HSA-168928	DDX58/IFIH1-mediated induction of interferon-alpha/beta	27	0.640193	2.26414	0.00117647	0.0442696	0.0324717
R-HSA-1169410	Antiviral mechanism by IFN-stimulated genes	26	0.680529	2.38635	0.00118906	0.0442696	0.0324717
R-HSA-6783783	Interleukin-10 signaling	22	0.84796	2.85449	0.00120773	0.0442696	0.0324717
R-HSA-216083	Integrin cell surface interactions	22	0.58543	1.97073	0.00120773	0.0442696	0.0324717
R-HSA-168643	Nucleotide-binding domain, leucine rich repeat containing receptor (NLR) signaling pathways	23	0.57301	1.94912	0.00121803	0.0442696	0.0324717
R-HSA-1169408	ISG15 antiviral mechanism	21	0.652308	2.16235	0.001221	0.0442696	0.0324717
R-HSA-451927	Interleukin-2 family signaling	17	0.631174	1.98365	0.00125628	0.0442696	0.0324717
R-HSA-198933	Immunoregulatory interactions between a Lymphoid and a non-Lymphoid cell	16	0.648503	2.00969	0.00126904	0.0442696	0.0324717
R-HSA-380108	Chemokine receptors bind chemokines	15	0.82684	2.51113	0.00128205	0.0442696	0.0324717
R-HSA-936440	Negative regulators of DDX58/IFIH1 signaling	13	0.713082	2.07064	0.00133511	0.0442696	0.0324717
R-HSA-168898	Toll-like Receptor Cascades	48	0.470807	1.87363	0.00221729	0.0652174	0.047837
R-HSA-375276	Peptide ligand-binding receptors	36	0.523923	1.98588	0.00225734	0.0652174	0.047837
R-HSA-5668541	TNFR2 non-canonical NF-kB pathway	29	0.504745	1.82313	0.00233645	0.0652174	0.047837
R-HSA-5260271	Diseases of Immune System	11	0.679665	1.8849	0.0027027	0.0652174	0.047837
R-HSA-5602358	Diseases associated with the TLR signaling cascade	11	0.679665	1.8849	0.0027027	0.0652174	0.047837
R-HSA-5357905	Regulation of TNFR1 signaling	11	0.676497	1.87611	0.0027027	0.0652174	0.047837
R-HSA-5683057	MAPK family signaling cascades	82	0.398361	1.72086	0.00316456	0.0652174	0.047837
R-HSA-75105	Fatty acyl-CoA biosynthesis	10	-0.586996	-2.07251	0.00369004	0.0652174	0.047837
R-HSA-174417	Telomere C-strand (Lagging Strand) Synthesis	12	-0.628248	-2.42571	0.00387597	0.0652174	0.047837
R-HSA-5651801	PCNA-Dependent Long Patch Base Excision Repair	12	-0.628248	-2.42571	0.00387597	0.0652174	0.047837
R-HSA-69205	G1/S-Specific Transcription	12	-0.671486	-2.59265	0.00387597	0.0652174	0.047837
R-HSA-110373	Resolution of AP sites via the multiple-nucleotide patch replacement pathway	13	-0.640885	-2.54089	0.00395257	0.0652174	0.047837
R-HSA-499943	Interconversion of nucleotide di- and triphosphates	13	-0.608111	-2.41095	0.00395257	0.0652174	0.047837
R-HSA-75893	TNF signaling	13	0.628305	1.82447	0.00400534	0.0652174	0.047837
R-HSA-5357956	TNFR1-induced NFkappaB signaling pathway	12	0.649827	1.84592	0.00403226	0.0652174	0.047837
R-HSA-388396	GPCR downstream signalling	136	0.348805	1.59813	0.00404449	0.0652174	0.047837
R-HSA-1606322	ZBP1(DAI) mediated induction of type I IFNs	10	0.656745	1.79088	0.00410397	0.0652174	0.047837
R-HSA-72165	mRNA Splicing - Minor Pathway	15	-0.617799	-2.56149	0.0045045	0.0652174	0.047837
R-HSA-68962	Activation of the pre-replicative complex	15	-0.669434	-2.77558	0.0045045	0.0652174	0.047837
R-HSA-168255	Influenza Life Cycle	15	-0.544829	-2.25895	0.0045045	0.0652174	0.047837
R-HSA-176187	Activation of ATR in response to replication stress	16	-0.668073	-2.82203	0.0046729	0.0652174	0.047837
R-HSA-69190	DNA strand elongation	18	-0.718584	-3.15232	0.00478469	0.0652174	0.047837
R-HSA-180786	Extension of Telomeres	17	-0.603668	-2.58165	0.00485437	0.0652174	0.047837
R-HSA-73933	Resolution of Abasic Sites (AP sites)	19	-0.588397	-2.63325	0.0049505	0.0652174	0.047837
R-HSA-1268020	Mitochondrial protein import	20	-0.520864	-2.40107	0.00507614	0.0652174	0.047837
R-HSA-191273	Cholesterol biosynthesis	20	-0.718442	-3.31186	0.00507614	0.0652174	0.047837
R-HSA-982772	Growth hormone receptor signaling	10	0.646244	1.76224	0.00547196	0.0652174	0.047837
R-HSA-2426168	Activation of gene expression by SREBF (SREBP)	23	-0.512574	-2.49714	0.00552486	0.0652174	0.047837
R-HSA-166016	Toll Like Receptor 4 (TLR4) Cascade	43	0.450172	1.76022	0.00558659	0.0652174	0.047837
R-HSA-380259	Loss of Nlp from mitotic centrosomes	22	-0.495175	-2.39545	0.00574713	0.0652174	0.047837
R-HSA-380284	Loss of proteins required for interphase microtubule organization from the centrosome	22	-0.495175	-2.39545	0.00574713	0.0652174	0.047837
R-HSA-380270	Recruitment of mitotic centrosome proteins and complexes	24	-0.502787	-2.47613	0.00584795	0.0652174	0.047837
R-HSA-380287	Centrosome maturation	24	-0.502787	-2.47613	0.00584795	0.0652174	0.047837
R-HSA-8854518	AURKA Activation by TPX2	24	-0.501648	-2.47053	0.00584795	0.0652174	0.047837
R-HSA-6799198	Complex I biogenesis	24	-0.608794	-2.9982	0.00584795	0.0652174	0.047837
R-HSA-5368287	Mitochondrial translation	25	-0.587377	-2.96106	0.00609756	0.0652174	0.047837
R-HSA-5389840	Mitochondrial translation elongation	25	-0.587377	-2.96106	0.00609756	0.0652174	0.047837
R-HSA-5368286	Mitochondrial translation initiation	25	-0.587377	-2.96106	0.00609756	0.0652174	0.047837
R-HSA-5419276	Mitochondrial translation termination	25	-0.587377	-2.96106	0.00609756	0.0652174	0.047837
R-HSA-141424	Amplification of signal from the kinetochores	26	-0.604566	-3.06667	0.00621118	0.0652174	0.047837
R-HSA-141444	Amplification of signal from unattached kinetochores via a MAD2 inhibitory signal	26	-0.604566	-3.06667	0.00621118	0.0652174	0.047837
R-HSA-5684996	MAPK1/MAPK3 signaling	72	0.396725	1.69153	0.00634249	0.0655045	0.0480475
R-HSA-1474244	Extracellular matrix organization	58	0.404052	1.66323	0.00645161	0.0655567	0.0480859
R-HSA-1834949	Cytosolic sensors of pathogen-associated DNA	28	0.476007	1.70107	0.00705882	0.0690827	0.0506722
R-HSA-372790	Signaling by GPCR	149	0.340788	1.57535	0.00706357	0.0690827	0.0506722
R-HSA-69618	Mitotic Spindle Checkpoint	30	-0.595783	-3.14694	0.00729927	0.0690827	0.0506722
R-HSA-69052	Switching of origins to a post-replicative state	30	-0.470247	-2.48385	0.00729927	0.0690827	0.0506722
R-HSA-5620912	Anchoring of the basal body to the plasma membrane	31	-0.473673	-2.5586	0.00740741	0.0690827	0.0506722
R-HSA-69002	DNA Replication Pre-Initiation	33	-0.462379	-2.53883	0.00746269	0.0690827	0.0506722
R-HSA-381340	Transcriptional regulation of white adipocyte differentiation	18	0.566526	1.80373	0.0075662	0.0690827	0.0506722
R-HSA-110314	Recognition of DNA damage by PCNA-containing replication complex	12	-0.573996	-2.21623	0.00775194	0.0697674	0.0511744
R-HSA-5696397	Gap-filling DNA repair synthesis and ligation in GG-NER	13	-0.521047	-2.06577	0.00790514	0.0701442	0.0514508
R-HSA-1442490	Collagen degradation	10	0.629445	1.71643	0.00820793	0.0713234	0.0523158
R-HSA-72172	mRNA Splicing	35	-0.386704	-2.09517	0.00826446	0.0713234	0.0523158
R-HSA-2500257	Resolution of Sister Chromatid Cohesion	36	-0.543405	-2.92533	0.00862069	0.0730435	0.0535774
R-HSA-6790901	rRNA modification in the nucleus and cytosol	14	-0.517628	-2.09128	0.00869565	0.0730435	0.0535774
R-HSA-73886	Chromosome Maintenance	40	-0.367012	-2.12934	0.00892857	0.0734266	0.0538584
R-HSA-168638	NOD1/2 Signaling Pathway	15	0.570453	1.73248	0.00897436	0.0734266	0.0538584
R-HSA-5663220	RHO GTPases Activate Formins	39	-0.518408	-2.94364	0.00925926	0.0740741	0.0543334
R-HSA-72203	Processing of Capped Intron-Containing Pre-mRNA	43	-0.367173	-2.17369	0.00934579	0.0740741	0.0543334
R-HSA-611105	Respiratory electron transport	42	-0.549007	-3.23499	0.00943396	0.0740741	0.0543334
R-HSA-163200	Respiratory electron transport, ATP synthesis by chemiosmotic coupling, and heat production by uncoupling proteins.	44	-0.556079	-3.31748	0.00952381	0.0740741	0.0543334
R-HSA-69239	Synthesis of DNA	45	-0.511303	-3.07171	0.00990099	0.0759036	0.0556753
R-HSA-69206	G1/S Transition	48	-0.436632	-2.73585	0.01	0.0759036	0.0556753
R-HSA-69306	DNA Replication	50	-0.509476	-3.31634	0.010989	0.0824176	0.0604533
R-HSA-168273	Influenza Viral RNA Transcription and Replication	11	-0.544254	-2.02265	0.0114504	0.0832342	0.0610524
R-HSA-6782210	Gap-filling DNA repair synthesis and ligation in TC-NER	22	-0.477385	-2.30939	0.0114943	0.0832342	0.0610524
R-HSA-72306	tRNA processing	22	-0.434746	-2.10312	0.0114943	0.0832342	0.0610524
R-HSA-418555	G alpha (s) signalling events	29	0.466199	1.68391	0.0116822	0.0832562	0.0610685
R-HSA-68949	Orc1 removal from chromatin	25	-0.452623	-2.28175	0.0121951	0.0832562	0.0610685
R-HSA-176814	Activation of APC/C and APC/C:Cdc20 mediated degradation of mitotic proteins	25	-0.448313	-2.26002	0.0121951	0.0832562	0.0610685
R-HSA-2467813	Separation of Sister Chromatids	54	-0.471304	-3.08848	0.0123457	0.0832562	0.0610685
R-HSA-72766	Translation	54	-0.398241	-2.60969	0.0123457	0.0832562	0.0610685
R-HSA-6781827	Transcription-Coupled Nucleotide Excision Repair (TC-NER)	26	-0.43388	-2.20086	0.0124224	0.0832562	0.0610685
R-HSA-8868773	rRNA processing in the nucleus and cytosol	26	-0.43941	-2.22891	0.0124224	0.0832562	0.0610685
R-HSA-69242	S Phase	53	-0.457299	-2.94523	0.0128205	0.0837321	0.0614175
R-HSA-72312	rRNA processing	28	-0.448105	-2.34267	0.0131579	0.0837321	0.0614175
R-HSA-380320	Recruitment of NuMA to mitotic centrosomes	28	-0.464524	-2.42851	0.0131579	0.0837321	0.0614175
R-HSA-68867	Assembly of the pre-replicative complex	27	-0.433517	-2.2153	0.0131579	0.0837321	0.0614175
R-HSA-1655829	Regulation of cholesterol biosynthesis by SREBP (SREBF)	27	-0.444111	-2.26943	0.0131579	0.0837321	0.0614175
R-HSA-68877	Mitotic Prometaphase	59	-0.490813	-3.30828	0.0135135	0.0841346	0.0617128
R-HSA-174143	APC/C-mediated degradation of cell cycle proteins	29	-0.404062	-2.12876	0.0136986	0.0841346	0.0617128
R-HSA-453276	Regulation of mitotic cell cycle	29	-0.404062	-2.12876	0.0136986	0.0841346	0.0617128
R-HSA-453279	Mitotic G1-G1/S phases	58	-0.347508	-2.28406	0.0138889	0.0841346	0.0617128
R-HSA-1428517	The citric acid (TCA) cycle and respiratory electron transport	58	-0.51081	-3.35739	0.0138889	0.0841346	0.0617128
R-HSA-5617833	Cilium Assembly	57	-0.396982	-2.60517	0.0140845	0.084507	0.061986
R-HSA-9614085	FOXO-mediated transcription	24	0.494326	1.70322	0.0144404	0.0857726	0.0629143
R-HSA-5673001	RAF/MAP kinase cascade	71	0.376257	1.60375	0.0148148	0.0857726	0.0629143
R-HSA-72163	mRNA Splicing - Major Pathway	33	-0.381571	-2.09513	0.0149254	0.0857726	0.0629143
R-HSA-453274	Mitotic G2-G2/M phases	63	-0.326712	-2.17164	0.0151515	0.0857726	0.0629143
R-HSA-174154	APC/C:Cdc20 mediated degradation of Securin	20	-0.408988	-1.88535	0.0152284	0.0857726	0.0629143
R-HSA-77289	Mitochondrial Fatty Acid Beta-Oxidation	11	-0.535007	-1.98828	0.0152672	0.0857726	0.0629143
R-HSA-2555396	Mitotic Metaphase and Anaphase	60	-0.426848	-2.72144	0.0153846	0.0857726	0.0629143
R-HSA-68882	Mitotic Anaphase	60	-0.426848	-2.72144	0.0153846	0.0857726	0.0629143
R-HSA-418594	G alpha (i) signalling events	67	0.374758	1.58874	0.015873	0.0863487	0.0633368
R-HSA-69275	G2/M Transition	61	-0.331546	-2.14197	0.016129	0.0863487	0.0633368
R-HSA-195258	RHO GTPase Effectors	70	-0.284208	-1.97389	0.0163934	0.0863487	0.0633368
R-HSA-5696398	Nucleotide Excision Repair	34	-0.387867	-2.09487	0.0165289	0.0863487	0.0633368
R-HSA-2132295	MHC class II antigen presentation	35	-0.344752	-1.86787	0.0165289	0.0863487	0.0633368
R-HSA-6791226	Major pathway of rRNA processing in the nucleolus and cytosol	23	-0.422084	-2.05629	0.0165746	0.0863487	0.0633368
R-HSA-179419	APC:Cdc20 mediated degradation of cell cycle proteins prior to satisfation of the cell cycle checkpoint	23	-0.4311	-2.10022	0.0165746	0.0863487	0.0633368
R-HSA-447115	Interleukin-12 family signaling	14	0.56047	1.6822	0.0168394	0.0863487	0.0633368
R-HSA-15869	Metabolism of nucleotides	36	-0.348543	-1.87632	0.0172414	0.0863487	0.0633368
R-HSA-6782135	Dual incision in TC-NER	22	-0.425354	-2.05768	0.0172414	0.0863487	0.0633368
R-HSA-69017	CDK-mediated phosphorylation and removal of Cdc6	22	-0.421804	-2.04051	0.0172414	0.0863487	0.0633368
R-HSA-174184	Cdc20:Phospho-APC/C mediated degradation of Cyclin A	22	-0.42503	-2.05612	0.0172414	0.0863487	0.0633368
R-HSA-176408	Regulation of APC/C activators between G1/S and early anaphase	24	-0.443707	-2.18518	0.0175439	0.0863487	0.0633368
R-HSA-174178	APC/C:Cdh1 mediated degradation of Cdc20 and other APC/C:Cdh1 targeted proteins in late mitosis/early G1	24	-0.442326	-2.17837	0.0175439	0.0863487	0.0633368
R-HSA-176409	APC/C:Cdc20 mediated degradation of mitotic proteins	24	-0.440754	-2.17064	0.0175439	0.0863487	0.0633368
R-HSA-1852241	Organelle biogenesis and maintenance	76	-0.289556	-1.98495	0.0181818	0.0882883	0.0647595
R-HSA-76061	RNA Polymerase III Transcription Initiation From Type 1 Promoter	10	-0.517433	-1.8269	0.0184502	0.0882883	0.0647595
R-HSA-69620	Cell Cycle Checkpoints	82	-0.365761	-2.5848	0.0185185	0.0882883	0.0647595
R-HSA-5696399	Global Genome Nucleotide Excision Repair (GG-NER)	26	-0.396354	-2.01051	0.0186335	0.0882883	0.0647595
R-HSA-5696400	Dual Incision in GG-NER	16	-0.448334	-1.89382	0.0186916	0.0882883	0.0647595
R-HSA-9609507	Protein localization	42	-0.329599	-1.94214	0.0188679	0.0882883	0.0647595
R-HSA-3000178	ECM proteoglycans	11	0.595213	1.65069	0.0189189	0.0882883	0.0647595
R-HSA-5685942	HDR through Homologous Recombination (HRR)	18	-0.428562	-1.88004	0.0191388	0.0886575	0.0650303
R-HSA-168181	Toll Like Receptor 7/8 (TLR7/8) Cascade	33	0.433959	1.61182	0.0195853	0.0894109	0.065583
R-HSA-975155	MyD88 dependent cascade initiated on endosome	33	0.433959	1.61182	0.0195853	0.0894109	0.065583
R-HSA-174084	Autodegradation of Cdh1 by Cdh1:APC/C	19	-0.398939	-1.78537	0.019802	0.08975	0.0658316
R-HSA-2565942	Regulation of PLK1 Activity at G2/M Transition	29	-0.355536	-1.87311	0.0205479	0.09181	0.0673426
R-HSA-8852276	The role of GTSE1 in G2/M progression after G2 checkpoint	29	-0.351976	-1.85435	0.0205479	0.09181	0.0673426
R-HSA-9607240	FLT3 Signaling	80	0.357691	1.54155	0.0211193	0.0936984	0.0687278
R-HSA-69481	G2/M Checkpoints	47	-0.274414	-1.69612	0.0215054	0.0945946	0.0693852
R-HSA-2980736	Peptide hormone metabolism	11	0.592832	1.64409	0.0216216	0.0945946	0.0693852
R-HSA-8957322	Metabolism of steroids	50	-0.279301	-1.81806	0.021978	0.0953462	0.0699365
R-HSA-9022692	Regulation of MECP2 expression and activity	10	-0.487253	-1.72035	0.0221402	0.0953462	0.0699365
R-HSA-166058	MyD88:MAL(TIRAP) cascade initiated on plasma membrane	34	0.424629	1.5964	0.0227015	0.0953462	0.0699365
R-HSA-168179	Toll Like Receptor TLR1:TLR2 Cascade	34	0.424629	1.5964	0.0227015	0.0953462	0.0699365
R-HSA-168188	Toll Like Receptor TLR6:TLR2 Cascade	34	0.424629	1.5964	0.0227015	0.0953462	0.0699365
R-HSA-181438	Toll Like Receptor 2 (TLR2) Cascade	34	0.424629	1.5964	0.0227015	0.0953462	0.0699365
R-HSA-3000171	Non-integrin membrane-ECM interactions	15	0.552626	1.67834	0.0230769	0.0962812	0.0706223
R-HSA-389661	Glyoxylate metabolism and glycine degradation	12	-0.458514	-1.77035	0.0232558	0.0963892	0.0707015
R-HSA-6781823	Formation of TC-NER Pre-Incision Complex	13	-0.454511	-1.80198	0.0237154	0.0972372	0.0713235
R-HSA-450408	AUF1 (hnRNP D0) binds and destabilizes mRNA	18	-0.393631	-1.7268	0.0239234	0.0972372	0.0713235
R-HSA-68827	CDT1 association with the CDC6:ORC:origin complex	18	-0.391071	-1.71557	0.0239234	0.0972372	0.0713235
R-HSA-2559583	Cellular Senescence	53	0.38783	1.58619	0.0248918	0.100524	0.0737347
R-HSA-5693579	Homologous DNA Pairing and Strand Exchange	10	-0.47253	-1.66837	0.0258303	0.10365	0.0760274
R-HSA-168138	Toll Like Receptor 9 (TLR9) Cascade	34	0.421992	1.58649	0.0261067	0.104096	0.0763547
R-HSA-5358351	Signaling by Hedgehog	40	-0.288144	-1.67177	0.0267857	0.106132	0.0778479
R-HSA-71406	Pyruvate metabolism and Citric Acid (TCA) cycle	15	-0.446027	-1.8493	0.027027	0.106419	0.0780583
R-HSA-400253	Circadian Clock	23	0.478931	1.6291	0.0280146	0.109622	0.0804081
R-HSA-73887	Death Receptor Signalling	49	0.387708	1.54992	0.0287293	0.111725	0.0819503
R-HSA-5358346	Hedgehog ligand biogenesis	17	-0.403814	-1.72695	0.0291262	0.112574	0.0825729
R-HSA-162906	HIV Infection	45	-0.279714	-1.68041	0.029703	0.114103	0.0836945
R-HSA-162587	HIV Life Cycle	26	-0.334463	-1.69657	0.0310559	0.117863	0.0864524
R-HSA-162909	Host Interactions of HIV factors	26	-0.340928	-1.72936	0.0310559	0.117863	0.0864524
R-HSA-68886	M Phase	107	-0.330124	-2.51197	0.0322581	0.121692	0.0892612
R-HSA-2219528	PI3K/AKT Signaling in Cancer	34	0.410669	1.54391	0.0329171	0.123439	0.0905428
R-HSA-5696394	DNA Damage Recognition in GG-NER	11	-0.445068	-1.65404	0.0343511	0.127789	0.0937333
R-HSA-194315	Signaling by Rho GTPases	101	-0.173358	-1.29423	0.0344828	0.127789	0.0937333
R-HSA-6784531	tRNA processing in the nucleus	10	-0.462758	-1.63386	0.0369004	0.135949	0.0997184
R-HSA-933542	TRAF6 mediated NF-kB activation	10	0.597729	1.62994	0.0383037	0.140298	0.102909
R-HSA-3371453	Regulation of HSF1-mediated heat shock response	14	-0.393971	-1.59169	0.0391304	0.141679	0.103922
R-HSA-73856	RNA Polymerase II Transcription Termination	14	-0.383131	-1.54789	0.0391304	0.141679	0.103922
R-HSA-199992	trans-Golgi Network Vesicle Budding	10	-0.449658	-1.58761	0.0405904	0.145362	0.106623
R-HSA-3371556	Cellular response to heat stress	20	-0.339502	-1.56503	0.0406091	0.145362	0.106623
R-HSA-74158	RNA Polymerase III Transcription	11	-0.418684	-1.55598	0.0419847	0.146383	0.107372
R-HSA-749476	RNA Polymerase III Abortive And Retractive Initiation	11	-0.418684	-1.55598	0.0419847	0.146383	0.107372
R-HSA-76046	RNA Polymerase III Transcription Initiation	11	-0.418684	-1.55598	0.0419847	0.146383	0.107372
R-HSA-917977	Transferrin endocytosis and recycling	11	-0.418476	-1.55521	0.0419847	0.146383	0.107372
R-HSA-5620924	Intraflagellar transport	16	-0.399335	-1.68685	0.0420561	0.146383	0.107372
R-HSA-6811558	PI5P, PP2A and IER3 Regulate PI3K/AKT Signaling	30	0.421076	1.52749	0.0427746	0.148066	0.108606
R-HSA-109582	Hemostasis	137	0.297022	1.36225	0.0434343	0.148866	0.109193
R-HSA-437239	Recycling pathway of L1	14	-0.377264	-1.52419	0.0434783	0.148866	0.109193
R-HSA-168164	Toll Like Receptor 3 (TLR3) Cascade	30	0.419837	1.523	0.0439306	0.149602	0.109733
R-HSA-162599	Late Phase of HIV Life Cycle	22	-0.313586	-1.517	0.045977	0.155729	0.114227
R-HSA-5173105	O-linked glycosylation	22	0.45497	1.53157	0.0471014	0.157632	0.115623
R-HSA-8856688	Golgi-to-ER retrograde transport	42	-0.247047	-1.45571	0.0471698	0.157632	0.115623
R-HSA-975138	TRAF6 mediated induction of NFkB and MAP kinases upon TLR7/8 or 9 activation	32	0.410817	1.51193	0.0472895	0.157632	0.115623
R-HSA-1433557	Signaling by SCF-KIT	16	0.506588	1.5699	0.0494924	0.163897	0.120219
R-HSA-186797	Signaling by PDGF	20	0.466698	1.52713	0.0496894	0.163897	0.120219
R-HSA-199418	Negative regulation of the PI3K/AKT network	32	0.4062	1.49494	0.0519031	0.169687	0.124466
R-HSA-2022090	Assembly of collagen fibrils and other multimeric structures	10	0.577335	1.57433	0.0519836	0.169687	0.124466
R-HSA-2219530	Constitutive Signaling by Aberrant PI3K in Cancer	23	0.450928	1.53385	0.0535932	0.17404	0.127658
R-HSA-388841	Costimulation by the CD28 family	17	0.492343	1.54734	0.0540201	0.174526	0.128015
R-HSA-72202	Transport of Mature Transcript to Cytoplasm	13	-0.383029	-1.51858	0.055336	0.175757	0.128918
R-HSA-166166	MyD88-independent TLR4 cascade	31	0.408177	1.48869	0.0553633	0.175757	0.128918
R-HSA-937061	TRIF(TICAM1)-mediated TLR4 signaling	31	0.408177	1.48869	0.0553633	0.175757	0.128918
R-HSA-8953854	Metabolism of RNA	122	-0.284923	-2.24269	0.0555556	0.175757	0.128918
R-HSA-5689896	Ovarian tumor domain proteases	16	0.499245	1.54714	0.0558376	0.175757	0.128918
R-HSA-5678895	Defective CFTR causes cystic fibrosis	16	-0.375494	-1.58614	0.0560748	0.175757	0.128918
R-HSA-9612973	Autophagy	22	-0.307101	-1.48563	0.0574713	0.179242	0.131474
R-HSA-5610780	Degradation of GLI1 by the proteasome	17	-0.371002	-1.58663	0.0582524	0.180783	0.132605
R-HSA-2142753	Arachidonic acid metabolism	15	0.503235	1.52834	0.0589744	0.182114	0.133581
R-HSA-6811434	COPI-dependent Golgi-to-ER retrograde traffic	32	-0.277576	-1.51591	0.0592593	0.182114	0.133581
R-HSA-2559582	Senescence-Associated Secretory Phenotype (SASP)	31	0.405127	1.47757	0.0599769	0.183305	0.134455
R-HSA-5387390	Hh mutants abrogate ligand secretion	16	-0.372058	-1.57163	0.0607477	0.183305	0.134455
R-HSA-5668914	Diseases of metabolism	23	-0.29671	-1.4455	0.0607735	0.183305	0.134455
R-HSA-3214841	PKMTs methylate histone lysines	11	0.556094	1.5422	0.0608108	0.183305	0.134455
R-HSA-5610785	GLI3 is processed to GLI3R by the proteasome	18	-0.347075	-1.52257	0.062201	0.186603	0.136873
R-HSA-8936459	RUNX1 regulates genes involved in megakaryocyte differentiation and platelet function	19	0.469949	1.51697	0.0625	0.186611	0.13688
R-HSA-382556	ABC-family proteins mediated transport	22	-0.296468	-1.43419	0.0632184	0.186984	0.137153
R-HSA-187577	SCF(Skp2)-mediated degradation of p27/p21	22	-0.289837	-1.40211	0.0632184	0.186984	0.137153
R-HSA-174113	SCF-beta-TrCP mediated degradation of Emi1	16	-0.366182	-1.5468	0.0654206	0.190914	0.140035
R-HSA-8854050	FBXL7 down-regulates AURKA during mitotic entry and in early mitosis	16	-0.367297	-1.55151	0.0654206	0.190914	0.140035
R-HSA-1989781	PPARA activates gene expression	28	0.408177	1.45867	0.0658824	0.190914	0.140035
R-HSA-400206	Regulation of lipid metabolism by Peroxisome proliferator-activated receptor alpha (PPARalpha)	28	0.408177	1.45867	0.0658824	0.190914	0.140035
R-HSA-383280	Nuclear Receptor transcription pathway	14	0.499847	1.50024	0.0660622	0.190914	0.140035
R-HSA-446652	Interleukin-1 family signaling	47	0.361855	1.44175	0.0671067	0.192334	0.141077
R-HSA-5610787	Hedgehog 'off' state	33	-0.269655	-1.48062	0.0671642	0.192334	0.141077
R-HSA-4086400	PCP/CE pathway	29	-0.291174	-1.53402	0.0684932	0.195252	0.143217
R-HSA-159236	Transport of Mature mRNA derived from an Intron-Containing Transcript	12	-0.382928	-1.47851	0.0697674	0.197989	0.145225
R-HSA-3371497	HSP90 chaperone cycle for steroid hormone receptors (SHR)	23	-0.29173	-1.42124	0.0718232	0.202703	0.148683
R-HSA-350562	Regulation of ornithine decarboxylase (ODC)	15	-0.352319	-1.46077	0.0720721	0.202703	0.148683
R-HSA-70171	Glycolysis	17	-0.346076	-1.48004	0.0728155	0.203073	0.148954
R-HSA-69202	Cyclin E associated events during G1/S transition	25	-0.285159	-1.43753	0.0731707	0.203073	0.148954
R-HSA-69656	Cyclin A:Cdk2-associated events at S phase entry	25	-0.285159	-1.43753	0.0731707	0.203073	0.148954
R-HSA-75815	Ubiquitin-dependent degradation of Cyclin D	16	-0.360719	-1.52373	0.0747664	0.205689	0.150873
R-HSA-4641258	Degradation of DVL	16	-0.357287	-1.50923	0.0747664	0.205689	0.150873
R-HSA-157579	Telomere Maintenance	29	-0.284766	-1.50026	0.0753425	0.206238	0.151276
R-HSA-9020702	Interleukin-1 signaling	38	0.371445	1.42661	0.0756208	0.206238	0.151276
R-HSA-111933	Calmodulin induced events	10	-0.429114	-1.51507	0.0774908	0.207339	0.152083
R-HSA-111996	Ca-dependent events	10	-0.429114	-1.51507	0.0774908	0.207339	0.152083
R-HSA-111997	CaM pathway	10	-0.429114	-1.51507	0.0774908	0.207339	0.152083
R-HSA-6782315	tRNA modification in the nucleus and cytosol	10	-0.429354	-1.51592	0.0774908	0.207339	0.152083
R-HSA-6811436	COPI-independent Golgi-to-ER retrograde traffic	17	-0.343563	-1.46929	0.0776699	0.207339	0.152083
R-HSA-1266738	Developmental Biology	196	0.270743	1.27682	0.0783133	0.208174	0.152696
R-HSA-9619483	Activation of AMPK downstream of NMDARs	10	-0.426242	-1.50494	0.0811808	0.214784	0.157544
R-HSA-73884	Base Excision Repair	31	-0.26548	-1.43402	0.0814815	0.214784	0.157544
R-HSA-3299685	Detoxification of Reactive Oxygen Species	13	-0.350585	-1.38995	0.083004	0.217885	0.159819
R-HSA-5619084	ABC transporter disorders	21	-0.292553	-1.38855	0.0874317	0.225225	0.165203
R-HSA-9615017	FOXO-mediated transcription of oxidative stress, metabolic and neuronal genes	10	0.541147	1.47565	0.0875513	0.225225	0.165203
R-HSA-983189	Kinesins	24	-0.276419	-1.36132	0.0877193	0.225225	0.165203
R-HSA-8878171	Transcriptional regulation by RUNX1	57	0.340552	1.40168	0.0891515	0.225225	0.165203
R-HSA-169911	Regulation of Apoptosis	15	-0.349569	-1.44937	0.0900901	0.225225	0.165203
R-HSA-180534	Vpu mediated degradation of CD4	15	-0.349569	-1.44937	0.0900901	0.225225	0.165203
R-HSA-211733	Regulation of activated PAK-2p34 by proteasome mediated degradation	15	-0.349569	-1.44937	0.0900901	0.225225	0.165203
R-HSA-349425	Autodegradation of the E3 ubiquitin ligase COP1	15	-0.349569	-1.44937	0.0900901	0.225225	0.165203
R-HSA-5362768	Hh mutants that don't undergo autocatalytic processing are degraded by ERAD	15	-0.349569	-1.44937	0.0900901	0.225225	0.165203
R-HSA-69601	Ubiquitin Mediated Degradation of Phosphorylated Cdc25A	15	-0.349569	-1.44937	0.0900901	0.225225	0.165203
R-HSA-69610	p53-Independent DNA Damage Response	15	-0.349569	-1.44937	0.0900901	0.225225	0.165203
R-HSA-69613	p53-Independent G1/S DNA damage checkpoint	15	-0.349569	-1.44937	0.0900901	0.225225	0.165203
R-HSA-72187	mRNA 3'-end processing	11	-0.382827	-1.42273	0.0916031	0.228102	0.167313
R-HSA-4608870	Asymmetric localization of PCP proteins	24	-0.273795	-1.34839	0.0935673	0.231222	0.169601
R-HSA-1474290	Collagen formation	15	0.469139	1.42478	0.0935897	0.231222	0.169601
R-HSA-8978868	Fatty acid metabolism	47	-0.214805	-1.32768	0.0967742	0.238155	0.174687
R-HSA-5688426	Deubiquitination	69	0.320515	1.35968	0.098831	0.242271	0.177706
R-HSA-1445148	Translocation of SLC2A4 (GLUT4) to the plasma membrane	15	-0.337578	-1.39965	0.103604	0.252986	0.185565
R-HSA-512988	Interleukin-3, Interleukin-5 and GM-CSF signaling	13	0.492532	1.43021	0.108144	0.263053	0.19295
R-HSA-1236978	Cross-presentation of soluble exogenous antigens (endosomes)	14	-0.338044	-1.36574	0.108696	0.263378	0.193188
R-HSA-445989	TAK1 activates NFkB by phosphorylation and activation of IKKs complex	14	0.471553	1.41532	0.110104	0.265767	0.19494
R-HSA-69278	Cell Cycle, Mitotic	169	-0.343679	-2.72442	0.111111	0.267176	0.195973
R-HSA-1489509	DAG and IP3 signaling	11	-0.377878	-1.40434	0.114504	0.271522	0.199161
R-HSA-2672351	Stimuli-sensing channels	21	0.419162	1.38949	0.114774	0.271522	0.199161
R-HSA-212436	Generic Transcription Pathway	345	0.245816	1.18524	0.11523	0.271522	0.199161
R-HSA-5628897	TP53 Regulates Metabolic Genes	25	-0.265455	-1.3382	0.115854	0.271522	0.199161
R-HSA-416476	G alpha (q) signalling events	37	0.359451	1.37377	0.116253	0.271522	0.199161
R-HSA-69541	Stabilization of p53	17	-0.322464	-1.37906	0.116505	0.271522	0.199161
R-HSA-9604323	Negative regulation of NOTCH4 signaling	17	-0.324142	-1.38623	0.116505	0.271522	0.199161
R-HSA-381426	Regulation of Insulin-like Growth Factor (IGF) transport and uptake by Insulin-like Growth Factor Binding Proteins (IGFBPs)	23	0.407389	1.38575	0.116931	0.271522	0.199161
R-HSA-1483249	Inositol phosphate metabolism	14	-0.329056	-1.32943	0.117391	0.271522	0.199161
R-HSA-202733	Cell surface interactions at the vascular wall	27	0.386333	1.36632	0.117647	0.271522	0.199161
R-HSA-2559586	DNA Damage/Telomere Stress Induced Senescence	20	0.424202	1.38808	0.118012	0.271522	0.199161
R-HSA-5633008	TP53 Regulates Transcription of Cell Death Genes	17	0.440038	1.38295	0.11809	0.271522	0.199161
R-HSA-446193	Biosynthesis of the N-glycan precursor (dolichol lipid-linked oligosaccharide, LLO) and transfer to a nascent protein	21	-0.274698	-1.3038	0.120219	0.27541	0.202013
R-HSA-71387	Metabolism of carbohydrates	67	-0.176684	-1.18045	0.122807	0.28032	0.205615
R-HSA-6807878	COPI-mediated anterograde transport	26	-0.260246	-1.3201	0.124224	0.280796	0.205964
R-HSA-6804756	Regulation of TP53 Activity through Phosphorylation	26	-0.261627	-1.3271	0.124224	0.280796	0.205964
R-HSA-177929	Signaling by EGFR	14	0.464157	1.39312	0.124352	0.280796	0.205964
R-HSA-5654736	Signaling by FGFR1	12	0.48722	1.38402	0.130376	0.292303	0.214404
R-HSA-9020591	Interleukin-12 signaling	12	0.489429	1.39029	0.130376	0.292303	0.214404
R-HSA-8957275	Post-translational protein phosphorylation	21	0.410934	1.36221	0.13431	0.300055	0.22009
R-HSA-8941858	Regulation of RUNX3 expression and activity	17	-0.308042	-1.31738	0.135922	0.301033	0.220808
R-HSA-211897	Cytochrome P450 - arranged by substrate type	13	0.470971	1.3676	0.136182	0.301033	0.220808
R-HSA-5675221	Negative regulation of MAPK pathway	13	0.471421	1.36891	0.136182	0.301033	0.220808
R-HSA-6805567	Keratinization	16	0.437334	1.35528	0.137056	0.301906	0.221448
R-HSA-1793185	Chondroitin sulfate/dermatan sulfate metabolism	17	-0.307512	-1.31511	0.140777	0.308219	0.226079
R-HSA-109704	PI3K Cascade	16	0.434721	1.34718	0.142132	0.308219	0.226079
R-HSA-112040	G-protein mediated events	13	-0.328431	-1.30211	0.142292	0.308219	0.226079
R-HSA-112043	PLC beta mediated events	13	-0.328431	-1.30211	0.142292	0.308219	0.226079
R-HSA-5625886	Activated PKN1 stimulates transcription of AR (androgen receptor) regulated genes KLK2 and KLK3	13	0.467134	1.35646	0.142857	0.308219	0.226079
R-HSA-73728	RNA Polymerase I Promoter Opening	13	0.467134	1.35646	0.142857	0.308219	0.226079
R-HSA-5685938	HDR through Single Strand Annealing (SSA)	11	-0.353859	-1.31507	0.145038	0.311857	0.228747
R-HSA-606279	Deposition of new CENPA-containing nucleosomes at the centromere	24	-0.254712	-1.25441	0.152047	0.323356	0.237181
R-HSA-774815	Nucleosome assembly	24	-0.254712	-1.25441	0.152047	0.323356	0.237181
R-HSA-5632684	Hedgehog 'on' state	24	-0.253678	-1.24932	0.152047	0.323356	0.237181
R-HSA-1630316	Glycosaminoglycan metabolism	25	-0.247748	-1.24894	0.152439	0.323356	0.237181
R-HSA-9006934	Signaling by Receptor Tyrosine Kinases	128	0.269898	1.23088	0.158376	0.333645	0.244729
R-HSA-351202	Metabolism of polyamines	19	-0.284635	-1.27383	0.158416	0.333645	0.244729
R-HSA-1632852	Macroautophagy	16	-0.306614	-1.29518	0.158879	0.333645	0.244729
R-HSA-2559580	Oxidative Stress Induced Senescence	33	0.345543	1.28342	0.163594	0.339937	0.249344
R-HSA-112399	IRS-mediated signalling	17	0.419751	1.31919	0.164573	0.339937	0.249344
R-HSA-2404192	Signaling by Type 1 Insulin-like Growth Factor 1 Receptor (IGF1R)	17	0.419751	1.31919	0.164573	0.339937	0.249344
R-HSA-2428924	IGF1R signaling cascade	17	0.419751	1.31919	0.164573	0.339937	0.249344
R-HSA-2428928	IRS-related events triggered by IGF1R	17	0.419751	1.31919	0.164573	0.339937	0.249344
R-HSA-3371571	HSF1-dependent transactivation	10	-0.370061	-1.30658	0.166052	0.341871	0.250763
R-HSA-9006936	Signaling by TGF-beta family members	34	0.342584	1.28795	0.167991	0.341898	0.250782
R-HSA-168142	Toll Like Receptor 10 (TLR10) Cascade	28	0.362851	1.29669	0.168235	0.341898	0.250782
R-HSA-168176	Toll Like Receptor 5 (TLR5) Cascade	28	0.362851	1.29669	0.168235	0.341898	0.250782
R-HSA-975871	MyD88 cascade initiated on plasma membrane	28	0.362851	1.29669	0.168235	0.341898	0.250782
R-HSA-5655302	Signaling by FGFR1 in disease	12	0.462593	1.31406	0.174731	0.352443	0.258517
R-HSA-5339562	Uptake and actions of bacterial toxins	10	0.480116	1.30923	0.175103	0.352443	0.258517
R-HSA-5357769	Caspase activation via extrinsic apoptotic signalling pathway	10	0.479402	1.30728	0.175103	0.352443	0.258517
R-HSA-6806834	Signaling by MET	15	0.4274	1.29802	0.178205	0.356718	0.261653
R-HSA-1474228	Degradation of the extracellular matrix	26	0.369617	1.2961	0.178359	0.356718	0.261653
R-HSA-373753	Nephrin family interactions	11	0.475291	1.31811	0.17973	0.357942	0.262551
R-HSA-1650814	Collagen biosynthesis and modifying enzymes	12	0.458319	1.30192	0.180108	0.357942	0.262551
R-HSA-5213460	RIPK1-mediated regulated necrosis	10	0.475372	1.29629	0.184679	0.364726	0.267526
R-HSA-5218859	Regulated Necrosis	10	0.475372	1.29629	0.184679	0.364726	0.267526
R-HSA-69563	p53-Dependent G1 DNA Damage Response	20	-0.268612	-1.23824	0.187817	0.367469	0.269538
R-HSA-69580	p53-Dependent G1/S DNA damage checkpoint	20	-0.268612	-1.23824	0.187817	0.367469	0.269538
R-HSA-69615	G1/S DNA Damage Checkpoints	20	-0.268612	-1.23824	0.187817	0.367469	0.269538
R-HSA-168254	Influenza Infection	21	-0.256792	-1.21881	0.191257	0.372397	0.273153
R-HSA-182971	EGFR downregulation	10	0.468467	1.27746	0.191518	0.372397	0.273153
R-HSA-375165	NCAM signaling for neurite out-growth	12	0.453559	1.2884	0.193548	0.374282	0.274536
R-HSA-190828	Gap junction trafficking	13	-0.311046	-1.23319	0.193676	0.374282	0.274536
R-HSA-5334118	DNA methylation	14	0.433215	1.30025	0.196891	0.375105	0.27514
R-HSA-373755	Semaphorin interactions	12	0.451464	1.28244	0.197581	0.375105	0.27514
R-HSA-167172	Transcription of the HIV genome	13	-0.309014	-1.22513	0.197628	0.375105	0.27514
R-HSA-389958	Cooperation of Prefoldin and TriC/CCT in actin and tubulin folding	12	-0.326717	-1.26148	0.197674	0.375105	0.27514
R-HSA-389960	Formation of tubulin folding intermediates by CCT/TriC	12	-0.326717	-1.26148	0.197674	0.375105	0.27514
R-HSA-422356	Regulation of insulin secretion	12	-0.329021	-1.27037	0.197674	0.375105	0.27514
R-HSA-1640170	Cell Cycle	187	-0.327293	-2.91282	0.2	0.377753	0.277082
R-HSA-8864260	Transcriptional regulation by the AP-2 (TFAP2) family of transcription factors	12	0.450941	1.28096	0.200269	0.377753	0.277082
R-HSA-2173796	SMAD2/SMAD3:SMAD4 heterotrimer regulates transcription	12	0.449995	1.27827	0.201613	0.379153	0.278109
R-HSA-190861	Gap junction assembly	10	-0.346575	-1.22366	0.206642	0.387454	0.284198
R-HSA-74751	Insulin receptor signalling cascade	19	0.385326	1.24381	0.215	0.401929	0.294815
R-HSA-73894	DNA Repair	85	-0.161251	-1.15074	0.215686	0.402019	0.294881
R-HSA-9616222	Transcriptional regulation of granulopoiesis	22	0.374911	1.26207	0.217391	0.404002	0.296335
R-HSA-448424	Interleukin-17 signaling	22	0.373138	1.2561	0.219807	0.406452	0.298132
R-HSA-114608	Platelet degranulation	28	0.343332	1.22694	0.22	0.406452	0.298132
R-HSA-171306	Packaging Of Telomere Ends	12	0.440139	1.25027	0.224462	0.413483	0.30329
R-HSA-186763	Downstream signal transduction	10	0.455482	1.24205	0.225718	0.414584	0.304098
R-HSA-1221632	Meiotic synapsis	15	0.40966	1.24415	0.229487	0.420282	0.308277
R-HSA-5617472	Activation of anterior HOX genes in hindbrain development during early embryogenesis	26	0.347109	1.21717	0.231867	0.422185	0.309673
R-HSA-5619507	Activation of HOX genes during differentiation	26	0.347109	1.21717	0.231867	0.422185	0.309673
R-HSA-5621481	C-type lectin receptors (CLRs)	41	0.311157	1.21367	0.232739	0.422553	0.309943
R-HSA-913709	O-linked glycosylation of mucins	17	0.392985	1.23507	0.237437	0.429843	0.31529
R-HSA-4641257	Degradation of AXIN	16	-0.283756	-1.19863	0.238318	0.430201	0.315553
R-HSA-5654743	Signaling by FGFR4	12	0.434625	1.23461	0.240591	0.433065	0.317653
R-HSA-199977	ER to Golgi Anterograde Transport	37	-0.214153	-1.18351	0.241379	0.433245	0.317785
R-HSA-6809371	Formation of the cornified envelope	14	0.413721	1.24175	0.242228	0.433533	0.317997
R-HSA-381038	XBP1(S) activates chaperone genes	13	-0.294013	-1.16566	0.245059	0.437358	0.320802
R-HSA-76005	Response to elevated platelet cytosolic Ca2+	29	0.332188	1.19986	0.247664	0.440757	0.323296
R-HSA-1296071	Potassium Channels	12	-0.299511	-1.15643	0.251938	0.446401	0.327436
R-HSA-8986944	Transcriptional Regulation by MECP2	15	-0.282028	-1.16933	0.252252	0.446401	0.327436
R-HSA-1257604	PIP3 activates AKT signaling	79	0.271288	1.16661	0.256085	0.451914	0.331479
R-HSA-3214815	HDACs deacetylate histones	19	0.369073	1.19135	0.26125	0.459742	0.337221
R-HSA-977225	Amyloid fiber formation	21	0.361447	1.19817	0.262515	0.460681	0.33791
R-HSA-5610783	Degradation of GLI2 by the proteasome	19	-0.252365	-1.12941	0.267327	0.467822	0.343147
R-HSA-427359	SIRT1 negatively regulates rRNA expression	16	0.385966	1.19609	0.269036	0.469508	0.344384
R-HSA-212300	PRC2 methylates histones and DNA	16	0.384503	1.19156	0.271574	0.472547	0.346614
R-HSA-9010553	Regulation of expression of SLITs and ROBOs	19	-0.250366	-1.12046	0.272277	0.472547	0.346614
R-HSA-5620920	Cargo trafficking to the periciliary membrane	14	-0.287759	-1.16258	0.273913	0.47408	0.347738
R-HSA-1280218	Adaptive Immune System	196	0.239375	1.12889	0.276104	0.474602	0.348121
R-HSA-5689880	Ub-specific processing proteases	50	0.290938	1.17104	0.276619	0.474602	0.348121
R-HSA-5693565	Recruitment and ATM-mediated phosphorylation of repair and signaling proteins at DNA double strand breaks	16	0.381914	1.18354	0.27665	0.474602	0.348121
R-HSA-983231	Factors involved in megakaryocyte development and platelet production	47	0.290074	1.15575	0.277228	0.474602	0.348121
R-HSA-114452	Activation of BH3-only proteins	11	0.429591	1.19138	0.281081	0.479895	0.352003
R-HSA-1912408	Pre-NOTCH Transcription and Translation	21	0.354401	1.17481	0.283272	0.482328	0.353788
R-HSA-1234176	Oxygen-dependent proline hydroxylation of Hypoxia-inducible Factor Alpha	16	-0.266242	-1.12464	0.285047	0.484042	0.355045
R-HSA-983705	Signaling by the B Cell Receptor (BCR)	40	0.296235	1.14496	0.291011	0.491646	0.360623
R-HSA-450294	MAP kinase activation	19	0.360479	1.16361	0.29125	0.491646	0.360623
R-HSA-163685	Integration of energy metabolism	18	-0.25334	-1.11136	0.291866	0.491646	0.360623
R-HSA-1643713	Signaling by EGFR in Cancer	10	0.428685	1.16898	0.295486	0.492788	0.361461
R-HSA-912446	Meiotic recombination	18	0.364108	1.15927	0.296343	0.492788	0.361461
R-HSA-110330	Recognition and association of DNA glycosylase with site containing an affected purine	14	0.388445	1.16588	0.296632	0.492788	0.361461
R-HSA-110331	Cleavage of the damaged purine	14	0.388445	1.16588	0.296632	0.492788	0.361461
R-HSA-73927	Depurination	14	0.388445	1.16588	0.296632	0.492788	0.361461
R-HSA-77387	Insulin receptor recycling	10	-0.317496	-1.12098	0.298893	0.492788	0.361461
R-HSA-76002	Platelet activation, signaling and aggregation	52	0.28098	1.13781	0.299781	0.492788	0.361461
R-HSA-112382	Formation of RNA Pol II elongation complex	14	-0.281487	-1.13724	0.3	0.492788	0.361461
R-HSA-75955	RNA Polymerase II Transcription Elongation	14	-0.281487	-1.13724	0.3	0.492788	0.361461
R-HSA-1500620	Meiosis	21	0.349086	1.15719	0.300366	0.492788	0.361461
R-HSA-983712	Ion channel transport	41	0.291276	1.13612	0.301782	0.493825	0.362221
R-HSA-5693571	Nonhomologous End-Joining (NHEJ)	14	0.385955	1.15841	0.303109	0.494711	0.362871
R-HSA-9617324	Negative regulation of NMDA receptor-mediated neuronal transmission	10	0.422506	1.15213	0.305062	0.496612	0.364265
R-HSA-8951664	Neddylation	53	-0.166207	-1.07045	0.307692	0.499603	0.366459
R-HSA-112316	Neuronal System	70	-0.157098	-1.09108	0.311475	0.503722	0.36948
R-HSA-389356	CD28 co-stimulation	12	0.406917	1.1559	0.311828	0.503722	0.36948
R-HSA-73857	RNA Polymerase II Transcription	375	0.222404	1.07655	0.318637	0.513405	0.376583
R-HSA-397014	Muscle contraction	26	0.324901	1.1393	0.319857	0.514056	0.377061
R-HSA-389957	Prefoldin mediated transfer of substrate to CCT/TriC	11	-0.299416	-1.11274	0.324427	0.520075	0.381475
R-HSA-373752	Netrin-1 signaling	11	0.41229	1.14339	0.328378	0.52465	0.384831
R-HSA-438064	Post NMDA receptor activation events	27	-0.213193	-1.08943	0.328947	0.52465	0.384831
R-HSA-157858	Gap junction trafficking and regulation	14	-0.272383	-1.10046	0.330435	0.525692	0.385595
R-HSA-427389	ERCC6 (CSB) and EHMT2 (G9a) positively regulate rRNA expression	17	0.358994	1.12825	0.334171	0.528871	0.387927
R-HSA-1474165	Reproduction	22	0.33322	1.12172	0.334541	0.528871	0.387927
R-HSA-674695	RNA Polymerase II Pre-transcription Events	17	-0.254035	-1.08641	0.334951	0.528871	0.387927
R-HSA-201722	Formation of the beta-catenin:TCF transactivating complex	20	0.338056	1.10619	0.336646	0.530217	0.388915
R-HSA-373080	Class B/2 (Secretin family receptors)	15	-0.259191	-1.07465	0.337838	0.530768	0.389318
R-HSA-5625740	RHO GTPases activate PKNs	17	0.355809	1.11824	0.339196	0.531576	0.389911
R-HSA-5218920	VEGFR2 mediated vascular permeability	12	0.397131	1.12811	0.340054	0.531598	0.389927
R-HSA-2173793	Transcriptional activity of SMAD2/SMAD3:SMAD4 heterotrimer	17	0.355555	1.11744	0.341709	0.532862	0.390855
R-HSA-5663202	Diseases of signal transduction	98	0.246678	1.09293	0.355072	0.552335	0.405138
R-HSA-1222556	ROS and RNS production in phagocytes	11	-0.289658	-1.07647	0.362595	0.562648	0.412703
R-HSA-8939236	RUNX1 regulates transcription of genes involved in differentiation of HSCs	33	0.294654	1.09441	0.368664	0.570659	0.418578
R-HSA-1500931	Cell-Cell communication	27	0.307506	1.08754	0.370588	0.572232	0.419732
R-HSA-5689603	UCH proteinases	25	-0.206953	-1.04329	0.371951	0.572932	0.420246
R-HSA-3899300	SUMOylation of transcription cofactors	11	-0.287979	-1.07024	0.374046	0.574753	0.421582
R-HSA-5693606	DNA Double Strand Break Response	17	0.342654	1.07689	0.376884	0.575698	0.422275
R-HSA-5576891	Cardiac conduction	20	0.328387	1.07455	0.37764	0.575698	0.422275
R-HSA-3560782	Diseases associated with glycosaminoglycan metabolism	11	-0.284755	-1.05826	0.377863	0.575698	0.422275
R-HSA-193704	p75 NTR receptor-mediated signalling	31	0.296051	1.07975	0.378316	0.575698	0.422275
R-HSA-381119	Unfolded Protein Response (UPR)	25	0.312051	1.08609	0.379475	0.57607	0.422548
R-HSA-74752	Signaling by Insulin receptor	28	0.300455	1.07371	0.387059	0.586171	0.429957
R-HSA-6807505	RNA polymerase II transcribes snRNA genes	17	-0.245303	-1.04907	0.38835	0.586715	0.430356
R-HSA-9033241	Peroxisomal protein import	13	-0.263234	-1.04363	0.391304	0.589765	0.432593
R-HSA-1912422	Pre-NOTCH Expression and Processing	24	0.305595	1.05294	0.409146	0.614286	0.450579
R-HSA-5693532	DNA Double-Strand Break Repair	44	-0.172408	-1.02856	0.409524	0.614286	0.450579
R-HSA-70326	Glucose metabolism	26	-0.202565	-1.02751	0.416149	0.622741	0.456781
R-HSA-416482	G alpha (12/13) signalling events	19	0.324496	1.04746	0.41875	0.625148	0.458546
R-HSA-3214858	RMTs methylate histone arginines	15	0.34366	1.0437	0.420513	0.626296	0.459388
R-HSA-110328	Recognition and association of DNA glycosylase with site containing an affected pyrimidine	16	0.330788	1.0251	0.427665	0.632462	0.463911
R-HSA-110329	Cleavage of the damaged pyrimidine	16	0.330788	1.0251	0.427665	0.632462	0.463911
R-HSA-73928	Depyrimidination	16	0.330788	1.0251	0.427665	0.632462	0.463911
R-HSA-109606	Intrinsic Pathway for Apoptosis	15	0.339478	1.031	0.432051	0.637453	0.467572
R-HSA-3108232	SUMO E3 ligases SUMOylate target proteins	44	0.261139	1.0247	0.435897	0.639565	0.469121
R-HSA-8848021	Signaling by PTK6	14	0.344674	1.03451	0.436528	0.639565	0.469121
R-HSA-9006927	Signaling by Non-Receptor Tyrosine Kinases	14	0.344674	1.03451	0.436528	0.639565	0.469121
R-HSA-6796648	TP53 Regulates Transcription of DNA Repair Genes	15	-0.239969	-0.99495	0.441441	0.645262	0.4733
R-HSA-9009391	Extra-nuclear estrogen signaling	19	0.317683	1.02547	0.44375	0.645836	0.473721
R-HSA-73772	RNA Polymerase I Promoter Escape	18	0.318688	1.01465	0.443884	0.645836	0.473721
R-HSA-193648	NRAGE signals death through JNK	19	0.316138	1.02048	0.4475	0.649597	0.47648
R-HSA-5357801	Programmed Cell Death	56	0.247255	1.01683	0.448649	0.649767	0.476604
R-HSA-1660499	Synthesis of PIPs at the plasma membrane	11	0.369617	1.02505	0.451351	0.652182	0.478376
R-HSA-180585	Vif-mediated degradation of APOBEC3G	16	-0.23724	-1.00213	0.453271	0.652927	0.478923
R-HSA-2990846	SUMOylation	45	0.256165	1.01182	0.45394	0.652927	0.478923
R-HSA-166658	Complement cascade	11	0.368403	1.02168	0.455405	0.653543	0.479374
R-HSA-8873719	RAB geranylgeranylation	12	-0.258434	-0.997829	0.457364	0.654863	0.480342
R-HSA-195253	Degradation of beta-catenin by the destruction complex	22	-0.201709	-0.975785	0.45977	0.656814	0.481774
R-HSA-3214847	HATs acetylate histones	24	0.291844	1.00556	0.464501	0.662071	0.485629
R-HSA-211945	Phase I - Functionalization of compounds	22	0.297771	1.00239	0.467391	0.664687	0.487548
R-HSA-442755	Activation of NMDA receptors and postsynaptic events	28	-0.187146	-0.978392	0.473684	0.672119	0.493
R-HSA-8939211	ESR-mediated signaling	55	0.244083	1.00176	0.47619	0.672827	0.493519
R-HSA-6791312	TP53 Regulates Transcription of Cell Cycle Genes	20	-0.215115	-0.991632	0.477157	0.672827	0.493519
R-HSA-73929	Base-Excision Repair, AP Site Formation	17	0.31359	0.98555	0.477387	0.672827	0.493519
R-HSA-983695	Antigen activates B Cell Receptor (BCR) leading to generation of second messengers	13	0.338761	0.983692	0.484646	0.680583	0.499208
R-HSA-425366	Transport of bile salts and organic acids, metal ions and amine compounds	12	0.349597	0.993077	0.485215	0.680583	0.499208
R-HSA-194840	Rho GTPase cycle	33	0.269354	1.00044	0.486175	0.680583	0.499208
R-HSA-190236	Signaling by FGFR	23	0.289569	0.984981	0.487211	0.680583	0.499208
R-HSA-75153	Apoptotic execution phase	15	0.323151	0.981414	0.488462	0.68082	0.499382
R-HSA-917937	Iron uptake and transport	19	-0.214519	-0.960036	0.490099	0.681032	0.499537
R-HSA-5693538	Homology Directed Repair	36	-0.18196	-0.979551	0.491379	0.681032	0.499537
R-HSA-109581	Apoptosis	54	0.241622	0.988472	0.491857	0.681032	0.499537
R-HSA-9012852	Signaling by NOTCH3	15	0.320603	0.973676	0.494872	0.683684	0.501482
R-HSA-2299718	Condensation of Prophase Chromosomes	19	0.304925	0.984284	0.49625	0.683684	0.501482
R-HSA-170834	Signaling by TGF-beta Receptor Complex	26	0.280883	0.984946	0.497027	0.683684	0.501482
R-HSA-5578775	Ion homeostasis	11	-0.259929	-0.965991	0.5	0.686275	0.503383
R-HSA-1168372	Downstream signaling events of B Cell Receptor (BCR)	29	0.273158	0.986644	0.502336	0.686991	0.503908
R-HSA-5674400	Constitutive Signaling by AKT1 E17K in Cancer	11	0.351329	0.974333	0.502703	0.686991	0.503908
R-HSA-450302	activated TAK1 mediates p38 MAPK activation	11	0.348293	0.965913	0.512162	0.698403	0.512279
R-HSA-9013694	Signaling by NOTCH4	24	-0.193531	-0.953107	0.51462	0.700239	0.513625
R-HSA-442982	Ras activation upon Ca2+ influx through NMDA receptor	10	0.351272	0.957883	0.521204	0.707066	0.518633
R-HSA-201681	TCF dependent signaling in response to WNT	52	0.23897	0.967693	0.521882	0.707066	0.518633
R-HSA-9024446	NR1H2 and NR1H3-mediated signaling	10	-0.26318	-0.929211	0.523985	0.708392	0.519606
R-HSA-9018519	Estrogen-dependent gene expression	38	0.251967	0.967733	0.525959	0.709538	0.520447
R-HSA-5654741	Signaling by FGFR3	11	0.341876	0.948117	0.531081	0.711715	0.522043
R-HSA-9639288	Amino acids regulate mTORC1	17	-0.219892	-0.940392	0.533981	0.711715	0.522043
R-HSA-6802946	Signaling by moderate kinase activity BRAF mutants	11	-0.251494	-0.934645	0.534351	0.711715	0.522043
R-HSA-6802949	Signaling by RAS mutants	11	-0.251494	-0.934645	0.534351	0.711715	0.522043
R-HSA-6802955	Paradoxical activation of RAF signaling by kinase inactive BRAF	11	-0.251494	-0.934645	0.534351	0.711715	0.522043
R-HSA-9649948	Signaling downstream of RAS mutants	11	-0.251494	-0.934645	0.534351	0.711715	0.522043
R-HSA-5607764	CLEC7A (Dectin-1) signaling	30	0.263743	0.956751	0.536416	0.712958	0.522955
R-HSA-74160	Gene expression (Transcription)	408	0.203725	0.987058	0.543544	0.72091	0.528788
R-HSA-6811442	Intra-Golgi and retrograde Golgi-to-ER traffic	56	-0.147016	-0.971482	0.545455	0.721925	0.529532
R-HSA-1236974	ER-Phagosome pathway	28	0.262788	0.939105	0.548235	0.723114	0.530405
R-HSA-6814122	Cooperation of PDCL (PhLP1) and TRiC/CCT in G-protein beta folding	11	0.333075	0.923709	0.548649	0.723114	0.530405
R-HSA-114604	GPVI-mediated activation cascade	11	0.331918	0.9205	0.55	0.723382	0.530601
R-HSA-3928665	EPH-ephrin mediated repulsion of cells	11	-0.248118	-0.922098	0.553435	0.726384	0.532803
R-HSA-9006925	Intracellular signaling by second messengers	89	0.217782	0.951456	0.559286	0.732537	0.537316
R-HSA-446219	Synthesis of substrates in N-glycan biosythesis	15	-0.221413	-0.918012	0.563063	0.735954	0.539822
R-HSA-194138	Signaling by VEGF	28	0.259266	0.926517	0.568235	0.741176	0.543653
R-HSA-2559585	Oncogene Induced Senescence	14	-0.227643	-0.919702	0.569565	0.741376	0.5438
R-HSA-3781865	Diseases of glycosylation	32	0.252313	0.928587	0.572088	0.743124	0.545082
R-HSA-2151201	Transcriptional activation of mitochondrial biogenesis	14	0.301542	0.905049	0.57513	0.745538	0.546853
R-HSA-1236975	Antigen processing-Cross presentation	32	0.251186	0.92444	0.576701	0.746041	0.547221
R-HSA-5578749	Transcriptional regulation by small RNAs	22	0.269407	0.906905	0.582126	0.751515	0.551236
R-HSA-421270	Cell-cell junction organization	12	0.313666	0.891012	0.586022	0.754997	0.553791
R-HSA-71291	Metabolism of amino acids and derivatives	92	0.213419	0.933925	0.590095	0.758693	0.556502
R-HSA-9006931	Signaling by Nuclear Receptors	70	0.219128	0.930151	0.591923	0.759494	0.55709
R-HSA-442742	CREB1 phosphorylation through NMDA receptor-mediated activation of RAS signaling	12	0.306759	0.871391	0.599462	0.767604	0.563038
R-HSA-5250924	B-WICH complex positively regulates rRNA expression	21	0.269545	0.89352	0.600733	0.76767	0.563087
R-HSA-157118	Signaling by NOTCH	59	0.219005	0.902989	0.603448	0.76958	0.564487
R-HSA-352230	Amino acid transport across the plasma membrane	10	-0.248589	-0.877694	0.605166	0.770211	0.56495
R-HSA-8950505	Gene and protein expression by JAK-STAT signaling after Interleukin-12 stimulation	10	0.324326	0.884404	0.607387	0.77148	0.565881
R-HSA-379724	tRNA Aminoacylation	14	0.294818	0.884867	0.608808	0.771729	0.566063
R-HSA-8956319	Nucleobase catabolism	14	-0.221383	-0.894413	0.613043	0.775537	0.568857
R-HSA-1483255	PI Metabolism	18	0.274896	0.875228	0.616646	0.778531	0.571053
R-HSA-5621575	CD209 (DC-SIGN) signaling	10	0.31781	0.866635	0.621067	0.78077	0.572695
R-HSA-9620244	Long-term potentiation	10	0.318575	0.868721	0.621067	0.78077	0.572695
R-HSA-5601884	PIWI-interacting RNA (piRNA) biogenesis	11	-0.230064	-0.855003	0.622137	0.78077	0.572695
R-HSA-2454202	Fc epsilon receptor (FCERI) signaling	39	0.23206	0.895018	0.62528	0.783153	0.574443
R-HSA-8878166	Transcriptional regulation by RUNX2	39	0.23053	0.889117	0.629754	0.787192	0.577406
R-HSA-427413	NoRC negatively regulates rRNA expression	24	0.251351	0.866041	0.631769	0.788147	0.578106
R-HSA-3858494	Beta-catenin independent WNT signaling	38	-0.159502	-0.889144	0.637931	0.794177	0.582529
R-HSA-1980143	Signaling by NOTCH1	15	0.282156	0.856914	0.639744	0.794177	0.582529
R-HSA-2029480	Fcgamma receptor (FCGR) dependent phagocytosis	15	0.280425	0.851658	0.647436	0.794177	0.582529
R-HSA-379716	Cytosolic tRNA aminoacylation	10	0.31009	0.845582	0.648427	0.794177	0.582529
R-HSA-2644602	Signaling by NOTCH1 PEST Domain Mutants in Cancer	12	0.295395	0.83911	0.649194	0.794177	0.582529
R-HSA-2644603	Signaling by NOTCH1 in Cancer	12	0.295395	0.83911	0.649194	0.794177	0.582529
R-HSA-2644606	Constitutive Signaling by NOTCH1 PEST Domain Mutants	12	0.295395	0.83911	0.649194	0.794177	0.582529
R-HSA-2894858	Signaling by NOTCH1 HD+PEST Domain Mutants in Cancer	12	0.295395	0.83911	0.649194	0.794177	0.582529
R-HSA-2894862	Constitutive Signaling by NOTCH1 HD+PEST Domain Mutants	12	0.295395	0.83911	0.649194	0.794177	0.582529
R-HSA-204998	Cell death signalling via NRAGE, NRIF and NADE	23	0.251079	0.854056	0.649208	0.794177	0.582529
R-HSA-211000	Gene Silencing by RNA	27	0.243687	0.861834	0.652941	0.79464	0.582869
R-HSA-1236394	Signaling by ERBB4	18	0.264517	0.842183	0.654477	0.79464	0.582869
R-HSA-211859	Biological oxidations	40	0.227165	0.878	0.655056	0.79464	0.582869
R-HSA-5676590	NIK-->noncanonical NF-kB signaling	17	-0.199464	-0.853032	0.65534	0.79464	0.582869
R-HSA-6794362	Protein-protein interactions at synapses	11	0.302625	0.839263	0.656757	0.79464	0.582869
R-HSA-8878159	Transcriptional regulation by RUNX3	31	0.237537	0.866339	0.657439	0.79464	0.582869
R-HSA-1234174	Cellular response to hypoxia	19	-0.193275	-0.864964	0.658416	0.79464	0.582869
R-HSA-73864	RNA Polymerase I Transcription	22	0.25009	0.84188	0.671498	0.806324	0.591439
R-HSA-73854	RNA Polymerase I Promoter Clearance	22	0.25009	0.84188	0.671498	0.806324	0.591439
R-HSA-204005	COPII-mediated vesicle transport	13	-0.212794	-0.843654	0.671937	0.806324	0.591439
R-HSA-422475	Axon guidance	109	0.196602	0.881209	0.679342	0.811425	0.595181
R-HSA-1227986	Signaling by ERBB2	18	0.257567	0.820053	0.679697	0.811425	0.595181
R-HSA-8943724	Regulation of PTEN gene transcription	14	0.272813	0.818822	0.680052	0.811425	0.595181
R-HSA-6806003	Regulation of TP53 Expression and Degradation	10	0.299924	0.817862	0.686731	0.817845	0.59989
R-HSA-5658442	Regulation of RAS by GAPs	20	-0.182203	-0.839919	0.705584	0.838713	0.615196
R-HSA-425393	Transport of inorganic cations/anions and amino acids/oligopeptides	31	0.226726	0.82691	0.707036	0.838856	0.615301
R-HSA-196849	Metabolism of water-soluble vitamins and cofactors	34	0.217472	0.817588	0.712826	0.842059	0.617651
R-HSA-4420097	VEGFA-VEGFR2 Pathway	27	0.230664	0.815775	0.712941	0.842059	0.617651
R-HSA-5619102	SLC transporter disorders	18	0.249688	0.794968	0.713745	0.842059	0.617651
R-HSA-70263	Gluconeogenesis	15	0.261075	0.792889	0.719231	0.846734	0.62108
R-HSA-5250941	Negative epigenetic regulation of rRNA expression	26	0.227158	0.796554	0.720571	0.846734	0.62108
R-HSA-8856825	Cargo recognition for clathrin-mediated endocytosis	27	0.226535	0.801175	0.723529	0.846734	0.62108
R-HSA-2173789	TGF-beta receptor signaling activates SMADs	11	0.285261	0.791107	0.724324	0.846734	0.62108
R-HSA-5250913	Positive epigenetic regulation of rRNA expression	24	0.227005	0.782156	0.724428	0.846734	0.62108
R-HSA-111885	Opioid Signalling	19	0.245589	0.792751	0.72875	0.850208	0.623628
R-HSA-446728	Cell junction organization	15	0.257625	0.782413	0.732051	0.851015	0.62422
R-HSA-446203	Asparagine N-linked glycosylation	72	-0.131914	-0.89443	0.732143	0.851015	0.62422
R-HSA-1169091	Activation of NF-kappaB in B cells	21	0.238433	0.790384	0.733822	0.851395	0.624499
R-HSA-69473	G2/M DNA damage checkpoint	20	0.239218	0.782772	0.735404	0.851582	0.624635
R-HSA-8853659	RET signaling	13	0.264718	0.768685	0.738318	0.851582	0.624635
R-HSA-376176	Signaling by ROBO receptors	29	-0.151973	-0.800658	0.739726	0.851582	0.624635
R-HSA-202403	TCR signaling	29	0.21768	0.786258	0.740654	0.851582	0.624635
R-HSA-5663205	Infectious disease	68	-0.129125	-0.871338	0.740741	0.851582	0.624635
R-HSA-5607761	Dectin-1 mediated noncanonical NF-kB signaling	18	-0.180254	-0.790749	0.751196	0.861141	0.631647
R-HSA-202424	Downstream TCR signaling	25	0.221121	0.769606	0.75179	0.861141	0.631647
R-HSA-8939902	Regulation of RUNX2 expression and activity	23	0.227667	0.774419	0.753959	0.862058	0.63232
R-HSA-2871837	FCERI mediated NF-kB activation	24	0.221508	0.763217	0.758123	0.863404	0.633307
R-HSA-110313	Translesion synthesis by Y family DNA polymerases bypasses lesions on DNA template	18	-0.176678	-0.775061	0.760766	0.863404	0.633307
R-HSA-5656169	Termination of translesion DNA synthesis	18	-0.176678	-0.775061	0.760766	0.863404	0.633307
R-HSA-983169	Class I MHC mediated antigen processing & presentation	99	0.183123	0.813494	0.762151	0.863404	0.633307
R-HSA-8866654	E3 ubiquitin ligases ubiquitinate target proteins	15	0.248195	0.753772	0.762821	0.863404	0.633307
R-HSA-6806667	Metabolism of fat-soluble vitamins	11	-0.208966	-0.776594	0.763359	0.863404	0.633307
R-HSA-9609736	Assembly and cell surface presentation of NMDA receptors	13	0.258846	0.751635	0.76502	0.863732	0.633548
R-HSA-5693607	Processing of DNA double-strand break ends	23	0.221254	0.752606	0.768575	0.864855	0.634371
R-HSA-6802952	Signaling by BRAF and RAF fusions	16	0.2415	0.748399	0.770305	0.864855	0.634371
R-HSA-163125	Post-translational modification: synthesis of GPI-anchored proteins	15	0.24624	0.747835	0.770513	0.864855	0.634371
R-HSA-8863795	Downregulation of ERBB2 signaling	12	0.259771	0.737916	0.771505	0.864855	0.634371
R-HSA-1251985	Nuclear signaling by ERBB4	11	0.264852	0.734507	0.774324	0.866473	0.635558
R-HSA-597592	Post-translational protein modification	313	0.181908	0.873715	0.776777	0.867676	0.636441
R-HSA-4086398	Ca2+ pathway	12	0.256078	0.727425	0.782258	0.871102	0.638953
R-HSA-428157	Sphingolipid metabolism	14	-0.188626	-0.762072	0.782609	0.871102	0.638953
R-HSA-3700989	Transcriptional Regulation by TP53	110	-0.112053	-0.858787	0.785714	0.873016	0.640358
R-HSA-418346	Platelet homeostasis	15	0.239264	0.72665	0.788462	0.874526	0.641465
R-HSA-381070	IRE1alpha activates chaperones	14	-0.185196	-0.748212	0.791304	0.87529	0.642026
R-HSA-156580	Phase II - Conjugation of compounds	18	0.232393	0.739903	0.791929	0.87529	0.642026
R-HSA-5693567	HDR through Homologous Recombination (HRR) or Single Strand Annealing (SSA)	34	-0.14777	-0.798107	0.793388	0.875367	0.642082
R-HSA-2682334	EPH-Ephrin signaling	16	-0.173675	-0.733625	0.799065	0.879581	0.645173
R-HSA-2173795	Downregulation of SMAD2/3:SMAD4 transcriptional activity	11	0.254716	0.706398	0.8	0.879581	0.645173
R-HSA-936837	Ion transport by P-type ATPases	14	-0.182153	-0.735917	0.804348	0.882817	0.647547
R-HSA-6811438	Intra-Golgi traffic	10	0.255077	0.69557	0.805746	0.882817	0.647547
R-HSA-112315	Transmission across Chemical Synapses	53	0.179805	0.735388	0.814935	0.888597	0.651786
R-HSA-3247509	Chromatin modifying enzymes	57	0.178135	0.733185	0.815252	0.888597	0.651786
R-HSA-4839726	Chromatin organization	57	0.178135	0.733185	0.815252	0.888597	0.651786
R-HSA-3108214	SUMOylation of DNA damage response and repair proteins	11	0.246645	0.684015	0.822973	0.895463	0.656822
R-HSA-187037	Signaling by NTRK1 (TRKA)	17	0.222942	0.700662	0.831658	0.903353	0.66261
R-HSA-5687128	MAPK6/MAPK4 signaling	25	0.199032	0.692727	0.834129	0.904477	0.663434
R-HSA-195721	Signaling by WNT	72	0.170985	0.729033	0.839323	0.908546	0.666419
R-HSA-68875	Mitotic Prophase	28	0.197181	0.70465	0.843529	0.911056	0.66826
R-HSA-2187338	Visual phototransduction	19	0.212336	0.685412	0.84625	0.911056	0.66826
R-HSA-1592230	Mitochondrial biogenesis	19	0.212123	0.684723	0.84875	0.911056	0.66826
R-HSA-8953897	Cellular responses to external stimuli	138	0.164018	0.752668	0.850505	0.911056	0.66826
R-HSA-73893	DNA Damage Bypass	19	-0.164823	-0.737634	0.851485	0.911056	0.66826
R-HSA-382551	Transport of small molecules	144	0.163847	0.755278	0.851665	0.911056	0.66826
R-HSA-373760	L1CAM interactions	28	0.194622	0.695506	0.851765	0.911056	0.66826
R-HSA-6802957	Oncogenic MAPK signaling	17	0.211894	0.665942	0.859296	0.912981	0.669672
R-HSA-450531	Regulation of mRNA stability by proteins that bind AU-rich elements	24	-0.15104	-0.743847	0.859649	0.912981	0.669672
R-HSA-8856828	Clathrin-mediated endocytosis	33	0.18262	0.678289	0.860599	0.912981	0.669672
R-HSA-8862803	Deregulated CDK5 triggers multiple neurodegenerative pathways in Alzheimer's disease models	11	0.232866	0.645802	0.860811	0.912981	0.669672
R-HSA-8863678	Neurodegenerative Diseases	11	0.232866	0.645802	0.860811	0.912981	0.669672
R-HSA-9007101	Rab regulation of trafficking	24	0.185368	0.638693	0.87485	0.926311	0.67945
R-HSA-425407	SLC-mediated transmembrane transport	54	0.164811	0.674241	0.88165	0.931946	0.683583
R-HSA-1643685	Disease	241	0.16095	0.764616	0.884885	0.933141	0.684459
R-HSA-2262752	Cellular responses to stress	136	0.156557	0.7173	0.885743	0.933141	0.684459
R-HSA-1226099	Signaling by FGFR in disease	20	0.194177	0.635389	0.888199	0.934166	0.685211
R-HSA-166520	Signaling by NTRKs	22	0.18539	0.624081	0.89372	0.938157	0.688139
R-HSA-112314	Neurotransmitter receptors and postsynaptic signal transmission	43	0.16517	0.645832	0.894972	0.938157	0.688139
R-HSA-556833	Metabolism of lipids	178	0.155176	0.727561	0.897384	0.939123	0.688847
R-HSA-6807070	PTEN Regulation	39	0.162996	0.628648	0.908277	0.948947	0.696053
R-HSA-174824	Plasma lipoprotein assembly, remodeling, and clearance	12	-0.167548	-0.646912	0.918605	0.9567	0.70174
R-HSA-212165	Epigenetic regulation of gene expression	37	0.156745	0.599056	0.918736	0.9567	0.70174
R-HSA-8876198	RAB GEFs exchange GTP for GDP on RABs	19	0.180052	0.581201	0.92375	0.960334	0.704406
R-HSA-392499	Metabolism of proteins	430	0.163298	0.792062	0.931	0.966277	0.708764
R-HSA-983168	Antigen processing: Ubiquitination & Proteasome degradation	80	0.143339	0.61775	0.933474	0.967251	0.709479
R-HSA-196854	Metabolism of vitamins and cofactors	53	0.149088	0.609757	0.942641	0.975146	0.71527
R-HSA-8948751	Regulation of PTEN stability and activity	23	0.16247	0.552649	0.945189	0.976179	0.716027
R-HSA-8955332	Carboxyterminal post-translational modifications of tubulin	15	-0.148789	-0.616904	0.954955	0.984651	0.722242
R-HSA-1483206	Glycerophospholipid biosynthesis	31	0.139725	0.509602	0.967705	0.992707	0.728151
R-HSA-390466	Chaperonin-mediated protein folding	27	0.144643	0.511552	0.969412	0.992707	0.728151
R-HSA-69231	Cyclin D associated events in G1	17	-0.130048	-0.556165	0.970874	0.992707	0.728151
R-HSA-69236	G1 Phase	17	-0.130048	-0.556165	0.970874	0.992707	0.728151
R-HSA-5654738	Signaling by FGFR2	18	0.158209	0.503714	0.970996	0.992707	0.728151
R-HSA-5619115	Disorders of transmembrane transporters	39	-0.10128	-0.575088	0.972222	0.992707	0.728151
R-HSA-111465	Apoptotic cleavage of cellular proteins	11	0.175754	0.487413	0.977027	0.995998	0.730565
R-HSA-1483257	Phospholipid metabolism	49	0.128332	0.513029	0.985635	1	0.7335
R-HSA-390471	Association of TriC/CCT with target proteins during biosynthesis	14	0.145289	0.436071	0.989637	1	0.7335
R-HSA-429914	Deadenylation-dependent mRNA decay	14	0.145588	0.436969	0.989637	1	0.7335
R-HSA-6798695	Neutrophil degranulation	111	0.111515	0.501451	0.990798	1	0.7335
R-HSA-2408522	Selenoamino acid metabolism	11	0.149013	0.413255	0.991892	1	0.7335
R-HSA-391251	Protein folding	29	0.115781	0.4182	0.994159	1	0.7335
R-HSA-8852135	Protein ubiquitination	23	0.121698	0.41396	0.995128	1	0.7335
R-HSA-5655253	Signaling by FGFR2 in disease	13	0.124523	0.36159	0.99733	1	0.7335
R-HSA-5633007	Regulation of TP53 Activity	44	0.0873546	0.342775	0.99777	1	0.7335
R-HSA-948021	Transport to the Golgi and subsequent modification	42	0.0839391	0.328894	0.998884	1	0.7335
R-HSA-199991	Membrane Trafficking	139	-0.0591973	-0.455079	1	1	0.7335
R-HSA-5653656	Vesicle-mediated transport	146	0.0614629	0.283321	1	1	0.7335

## Sheet: GO
ontology	node_id	node_name	raw_p_overrep	FWER_overrep
cellular_component	GO:0005622	intracellular	6.61583e-73	0
cellular_component	GO:0005737	cytoplasm	4.63789e-65	0
cellular_component	GO:0043227	membrane-bounded organelle	3.11029e-57	0
cellular_component	GO:0043226	organelle	1.12478e-53	0
cellular_component	GO:0043231	intracellular membrane-bounded organelle	1.13278e-53	0
cellular_component	GO:0043229	intracellular organelle	3.04479e-52	0
cellular_component	GO:0005829	cytosol	2.6795e-40	0
biological_process	GO:0009058	biosynthetic process	5.97241e-40	0
biological_process	GO:1901576	organic substance biosynthetic process	6.01127e-39	0
biological_process	GO:1901362	organic cyclic compound biosynthetic process	2.55697e-38	0
biological_process	GO:0044249	cellular biosynthetic process	7.6663e-37	0
biological_process	GO:0044237	cellular metabolic process	1.43174e-35	0
biological_process	GO:0018130	heterocycle biosynthetic process	8.06575e-35	0
biological_process	GO:0019438	aromatic compound biosynthetic process	1.37661e-34	0
biological_process	GO:0044260	cellular macromolecule metabolic process	2.20332e-34	0
biological_process	GO:0034654	nucleobase-containing compound biosynthetic process	6.49246e-33	0
biological_process	GO:0010033	response to organic substance	2.20149e-31	0
biological_process	GO:0044271	cellular nitrogen compound biosynthetic process	2.23253e-30	0
biological_process	GO:0044238	primary metabolic process	4.88047e-30	0
biological_process	GO:0034097	response to cytokine	1.23134e-29	0
biological_process	GO:0080090	regulation of primary metabolic process	1.76937e-29	0
cellular_component	GO:0005654	nucleoplasm	3.96538e-29	0
biological_process	GO:0006807	nitrogen compound metabolic process	9.13804e-28	0
biological_process	GO:0031323	regulation of cellular metabolic process	9.24909e-28	0
biological_process	GO:0070887	cellular response to chemical stimulus	1.74453e-27	0
molecular_function	GO:0005515	protein binding	3.4773e-27	0
biological_process	GO:0051171	regulation of nitrogen compound metabolic process	4.57426e-27	0
biological_process	GO:0071345	cellular response to cytokine stimulus	1.39075e-26	0
biological_process	GO:0071310	cellular response to organic substance	2.47605e-26	0
biological_process	GO:0006950	response to stress	3.21214e-25	0
biological_process	GO:0034645	cellular macromolecule biosynthetic process	3.538e-25	0
biological_process	GO:0048522	positive regulation of cellular process	5.13011e-25	0
biological_process	GO:0009059	macromolecule biosynthetic process	5.65393e-25	0
biological_process	GO:0048518	positive regulation of biological process	6.70103e-25	0
biological_process	GO:1901564	organonitrogen compound metabolic process	1.19625e-24	0
biological_process	GO:0006796	phosphate-containing compound metabolic process	1.77052e-24	0
biological_process	GO:0008152	metabolic process	2.78058e-24	0
biological_process	GO:0006793	phosphorus metabolic process	3.61351e-24	0
biological_process	GO:0006351	transcription, DNA-templated	3.65829e-24	0
biological_process	GO:0009889	regulation of biosynthetic process	7.08213e-24	0
biological_process	GO:0032774	RNA biosynthetic process	1.01573e-23	0
cellular_component	GO:0005634	nucleus	1.84301e-23	0
biological_process	GO:0097659	nucleic acid-templated transcription	1.91915e-23	0
biological_process	GO:0019219	regulation of nucleobase-containing compound metabolic process	7.32247e-23	0
biological_process	GO:0006366	transcription by RNA polymerase II	1.60285e-22	0
biological_process	GO:0006355	regulation of transcription, DNA-templated	1.93376e-22	0
biological_process	GO:0033554	cellular response to stress	2.17707e-22	0
cellular_component	GO:0005739	mitochondrion	2.8787e-22	0
biological_process	GO:1903506	regulation of nucleic acid-templated transcription	8.22796e-22	0
biological_process	GO:2001141	regulation of RNA biosynthetic process	8.23153e-22	0
biological_process	GO:0009893	positive regulation of metabolic process	9.80524e-22	0
biological_process	GO:0051252	regulation of RNA metabolic process	1.30729e-21	0
biological_process	GO:0031325	positive regulation of cellular metabolic process	1.52936e-21	0
biological_process	GO:0006357	regulation of transcription by RNA polymerase II	2.01461e-21	0
biological_process	GO:0019221	cytokine-mediated signaling pathway	3.63467e-21	0
biological_process	GO:0010646	regulation of cell communication	4.71109e-21	0
biological_process	GO:0031326	regulation of cellular biosynthetic process	9.60689e-21	0
biological_process	GO:0010556	regulation of macromolecule biosynthetic process	1.40596e-20	0
biological_process	GO:0010604	positive regulation of macromolecule metabolic process	1.57735e-20	0
biological_process	GO:0009605	response to external stimulus	1.89452e-20	0
biological_process	GO:0023051	regulation of signaling	1.98929e-20	0
biological_process	GO:2000112	regulation of cellular macromolecule biosynthetic process	2.14379e-20	0
biological_process	GO:0051173	positive regulation of nitrogen compound metabolic process	4.09031e-20	0
biological_process	GO:0009966	regulation of signal transduction	4.45484e-20	0
biological_process	GO:0071704	organic substance metabolic process	1.30404e-19	0
biological_process	GO:0035556	intracellular signal transduction	5.45294e-19	0
biological_process	GO:1901360	organic cyclic compound metabolic process	6.5887e-19	0
molecular_function	GO:0043167	ion binding	2.31084e-18	0
biological_process	GO:0008219	cell death	5.23338e-18	0
biological_process	GO:0034641	cellular nitrogen compound metabolic process	7.63212e-18	0
molecular_function	GO:0005488	binding	1.06232e-17	0
biological_process	GO:0080134	regulation of response to stress	1.26146e-17	0
biological_process	GO:0044283	small molecule biosynthetic process	1.33777e-17	0
biological_process	GO:0006915	apoptotic process	1.55042e-17	0
biological_process	GO:0043412	macromolecule modification	1.75877e-17	0
biological_process	GO:0010941	regulation of cell death	2.09e-17	0
biological_process	GO:1902531	regulation of intracellular signal transduction	2.45099e-17	0
biological_process	GO:0009607	response to biotic stimulus	4.07956e-17	0
cellular_component	GO:0031974	membrane-enclosed lumen	5.70762e-17	0
cellular_component	GO:0043233	organelle lumen	5.70762e-17	0
cellular_component	GO:0070013	intracellular organelle lumen	5.70762e-17	0
biological_process	GO:0006464	cellular protein modification process	6.58145e-17	0
biological_process	GO:0036211	protein modification process	6.58145e-17	0
biological_process	GO:0044281	small molecule metabolic process	8.93964e-17	0
biological_process	GO:0048523	negative regulation of cellular process	1.01199e-16	0
biological_process	GO:0019222	regulation of metabolic process	1.13128e-16	0
biological_process	GO:0051707	response to other organism	1.13176e-16	0
biological_process	GO:0048583	regulation of response to stimulus	1.13935e-16	0
biological_process	GO:0043207	response to external biotic stimulus	1.4284e-16	0
biological_process	GO:0016310	phosphorylation	1.48459e-16	0
biological_process	GO:1901700	response to oxygen-containing compound	1.71081e-16	0
biological_process	GO:0019538	protein metabolic process	1.94099e-16	0
molecular_function	GO:0003824	catalytic activity	2.93216e-16	0
biological_process	GO:0023056	positive regulation of signaling	3.09511e-16	0
biological_process	GO:0010647	positive regulation of cell communication	3.9984e-16	0
biological_process	GO:0009615	response to virus	4.93614e-16	0
biological_process	GO:0042221	response to chemical	5.69538e-16	0
biological_process	GO:0007049	cell cycle	7.20266e-16	0
biological_process	GO:0012501	programmed cell death	7.37034e-16	0
cellular_component	GO:0031090	organelle membrane	1.06787e-15	0
biological_process	GO:0051247	positive regulation of protein metabolic process	1.35466e-15	0
biological_process	GO:0065009	regulation of molecular function	1.36371e-15	0
biological_process	GO:0044267	cellular protein metabolic process	1.80687e-15	0
biological_process	GO:0043067	regulation of programmed cell death	1.91012e-15	0
biological_process	GO:0042981	regulation of apoptotic process	2.18705e-15	0
biological_process	GO:0051246	regulation of protein metabolic process	2.72797e-15	0
biological_process	GO:0006725	cellular aromatic compound metabolic process	3.39925e-15	0
biological_process	GO:0060337	type I interferon signaling pathway	4.2841e-15	0
biological_process	GO:0071357	cellular response to type I interferon	4.2841e-15	0
biological_process	GO:0051607	defense response to virus	4.28611e-15	0
biological_process	GO:0032270	positive regulation of cellular protein metabolic process	4.51404e-15	0
biological_process	GO:0009967	positive regulation of signal transduction	5.12949e-15	0
biological_process	GO:0044419	interspecies interaction between organisms	6.22759e-15	0
biological_process	GO:0033993	response to lipid	6.34014e-15	0
biological_process	GO:0002831	regulation of response to biotic stimulus	7.3697e-15	0
biological_process	GO:0034340	response to type I interferon	7.64953e-15	0
biological_process	GO:0007166	cell surface receptor signaling pathway	8.631e-15	0
biological_process	GO:0046483	heterocycle metabolic process	9.58476e-15	0
biological_process	GO:0000122	negative regulation of transcription by RNA polymerase II	3.04713e-14	0
biological_process	GO:0045087	innate immune response	4.00584e-14	0
biological_process	GO:0032268	regulation of cellular protein metabolic process	4.10925e-14	0
biological_process	GO:0050794	regulation of cellular process	6.81334e-14	0
biological_process	GO:0060255	regulation of macromolecule metabolic process	7.06517e-14	0
biological_process	GO:0048585	negative regulation of response to stimulus	7.57805e-14	0
biological_process	GO:0097190	apoptotic signaling pathway	7.99506e-14	0
biological_process	GO:0009628	response to abiotic stimulus	8.38605e-14	0
biological_process	GO:0051240	positive regulation of multicellular organismal process	9.95188e-14	0
biological_process	GO:0009891	positive regulation of biosynthetic process	1.15193e-13	0
biological_process	GO:0000278	mitotic cell cycle	1.33572e-13	0
biological_process	GO:0010557	positive regulation of macromolecule biosynthetic process	1.47644e-13	0
biological_process	GO:0071840	cellular component organization or biogenesis	1.61757e-13	0
biological_process	GO:0050790	regulation of catalytic activity	1.68578e-13	0
biological_process	GO:0001816	cytokine production	1.91117e-13	0
biological_process	GO:0006139	nucleobase-containing compound metabolic process	1.97778e-13	0
biological_process	GO:0006996	organelle organization	2.25025e-13	0
biological_process	GO:0010942	positive regulation of cell death	2.41406e-13	0
biological_process	GO:0031399	regulation of protein modification process	3.14233e-13	0
biological_process	GO:0016043	cellular component organization	3.24532e-13	0
biological_process	GO:0001817	regulation of cytokine production	3.314e-13	0
biological_process	GO:0055114	oxidation-reduction process	3.44982e-13	0
biological_process	GO:0048584	positive regulation of response to stimulus	3.5355e-13	0
biological_process	GO:0006952	defense response	4.36831e-13	0
biological_process	GO:0006468	protein phosphorylation	5.45986e-13	0
biological_process	GO:0031328	positive regulation of cellular biosynthetic process	6.34847e-13	0
biological_process	GO:0043065	positive regulation of apoptotic process	7.45685e-13	0
biological_process	GO:0071396	cellular response to lipid	8.6844e-13	0
biological_process	GO:0002376	immune system process	1.00951e-12	0
molecular_function	GO:0000166	nucleotide binding	1.10943e-12	0
cellular_component	GO:0012505	endomembrane system	1.19717e-12	0
molecular_function	GO:1901265	nucleoside phosphate binding	1.20822e-12	0
biological_process	GO:0043068	positive regulation of programmed cell death	1.28527e-12	0
cellular_component	GO:0031967	organelle envelope	1.28903e-12	0
cellular_component	GO:0031975	envelope	1.28903e-12	0
molecular_function	GO:0019899	enzyme binding	1.4438e-12	0
cellular_component	GO:0005740	mitochondrial envelope	1.48573e-12	0
biological_process	GO:0031347	regulation of defense response	1.59454e-12	0
biological_process	GO:1901701	cellular response to oxygen-containing compound	2.04157e-12	0
biological_process	GO:0051090	regulation of DNA-binding transcription factor activity	2.3129e-12	0
biological_process	GO:1901565	organonitrogen compound catabolic process	2.42966e-12	0
biological_process	GO:0098542	defense response to other organism	2.77231e-12	0
biological_process	GO:0007249	I-kappaB kinase/NF-kappaB signaling	2.93416e-12	0
biological_process	GO:0010628	positive regulation of gene expression	3.22188e-12	0
biological_process	GO:0051716	cellular response to stimulus	3.35364e-12	0
biological_process	GO:0045935	positive regulation of nucleobase-containing compound metabolic process	3.40098e-12	0
biological_process	GO:0010243	response to organonitrogen compound	3.74311e-12	0
biological_process	GO:0032101	regulation of response to external stimulus	5.69797e-12	0
biological_process	GO:0002237	response to molecule of bacterial origin	6.01505e-12	0
biological_process	GO:0044093	positive regulation of molecular function	6.83678e-12	0
biological_process	GO:0051239	regulation of multicellular organismal process	7.32015e-12	0
biological_process	GO:0023057	negative regulation of signaling	8.42845e-12	0
molecular_function	GO:0140110	transcription regulator activity	8.45897e-12	0
cellular_component	GO:0110165	cellular anatomical entity	8.49206e-12	0
molecular_function	GO:0003700	DNA-binding transcription factor activity	8.9393e-12	0
biological_process	GO:0010648	negative regulation of cell communication	9.0718e-12	0
cellular_component	GO:0031981	nuclear lumen	9.16282e-12	0
biological_process	GO:0048525	negative regulation of viral process	9.73227e-12	0
biological_process	GO:0032496	response to lipopolysaccharide	1.15032e-11	0
biological_process	GO:0009056	catabolic process	1.21014e-11	0
biological_process	GO:0032606	type I interferon production	1.25463e-11	0
biological_process	GO:0009968	negative regulation of signal transduction	1.50359e-11	0
molecular_function	GO:0000981	DNA-binding transcription factor activity, RNA polymerase II-specific	1.64793e-11	0
biological_process	GO:0032479	regulation of type I interferon production	2.12654e-11	0
biological_process	GO:1901698	response to nitrogen compound	2.16981e-11	0
biological_process	GO:0009719	response to endogenous stimulus	2.2529e-11	0
biological_process	GO:0071347	cellular response to interleukin-1	2.27137e-11	0
biological_process	GO:1903047	mitotic cell cycle process	2.50499e-11	0
biological_process	GO:0051338	regulation of transferase activity	2.87087e-11	0
biological_process	GO:1902533	positive regulation of intracellular signal transduction	3.13192e-11	0
molecular_function	GO:0003677	DNA binding	3.19669e-11	0
biological_process	GO:0034341	response to interferon-gamma	3.62073e-11	0
biological_process	GO:0060548	negative regulation of cell death	3.90611e-11	0
biological_process	GO:0045892	negative regulation of transcription, DNA-templated	3.9658e-11	0
biological_process	GO:0006974	cellular response to DNA damage stimulus	4.46527e-11	0
biological_process	GO:0051726	regulation of cell cycle	4.71298e-11	0
biological_process	GO:0031324	negative regulation of cellular metabolic process	4.85325e-11	0
molecular_function	GO:0046872	metal ion binding	5.21865e-11	0
biological_process	GO:0065008	regulation of biological quality	5.36663e-11	0
cellular_component	GO:0031966	mitochondrial membrane	5.66255e-11	0
biological_process	GO:0051254	positive regulation of RNA metabolic process	5.95049e-11	0
biological_process	GO:0019752	carboxylic acid metabolic process	7.28586e-11	0
molecular_function	GO:1901363	heterocyclic compound binding	7.99154e-11	0
biological_process	GO:0070482	response to oxygen levels	9.63325e-11	0
biological_process	GO:0043122	regulation of I-kappaB kinase/NF-kappaB signaling	9.9136e-11	0
biological_process	GO:0045088	regulation of innate immune response	1.2136e-10	0
biological_process	GO:1901615	organic hydroxy compound metabolic process	1.34585e-10	0
biological_process	GO:0031401	positive regulation of protein modification process	1.36569e-10	0
biological_process	GO:0051128	regulation of cellular component organization	1.42518e-10	0
biological_process	GO:0009725	response to hormone	1.62933e-10	0
biological_process	GO:1903508	positive regulation of nucleic acid-templated transcription	1.67193e-10	0
molecular_function	GO:0043169	cation binding	1.6955e-10	0
biological_process	GO:1903507	negative regulation of nucleic acid-templated transcription	1.73211e-10	0
biological_process	GO:0019220	regulation of phosphate metabolic process	1.73606e-10	0
molecular_function	GO:0097159	organic cyclic compound binding	1.74479e-10	0
biological_process	GO:1902680	positive regulation of RNA biosynthetic process	1.81813e-10	0
biological_process	GO:0045893	positive regulation of transcription, DNA-templated	1.87301e-10	0
biological_process	GO:0051174	regulation of phosphorus metabolic process	2.03396e-10	0
biological_process	GO:1902679	negative regulation of RNA biosynthetic process	2.09293e-10	0
biological_process	GO:1903706	regulation of hemopoiesis	2.19138e-10	0
biological_process	GO:0034612	response to tumor necrosis factor	2.23579e-10	0
biological_process	GO:0002520	immune system development	2.68859e-10	0
biological_process	GO:0044248	cellular catabolic process	2.7022e-10	0
biological_process	GO:0070555	response to interleukin-1	3.09506e-10	0
biological_process	GO:0090304	nucleic acid metabolic process	3.29005e-10	0
molecular_function	GO:0016491	oxidoreductase activity	3.39743e-10	0
biological_process	GO:0051172	negative regulation of nitrogen compound metabolic process	3.40238e-10	0
biological_process	GO:0045071	negative regulation of viral genome replication	3.8096e-10	0
biological_process	GO:0002682	regulation of immune system process	4.06435e-10	0
biological_process	GO:1901575	organic substance catabolic process	4.41219e-10	0
cellular_component	GO:0015630	microtubule cytoskeleton	4.55389e-10	0
biological_process	GO:0008283	cell population proliferation	4.87333e-10	0
molecular_function	GO:0036094	small molecule binding	5.06273e-10	0
biological_process	GO:0045862	positive regulation of proteolysis	5.75537e-10	0
biological_process	GO:0048534	hematopoietic or lymphoid organ development	7.16493e-10	0
biological_process	GO:1903901	negative regulation of viral life cycle	7.39425e-10	0
biological_process	GO:0043436	oxoacid metabolic process	7.47106e-10	0
biological_process	GO:0071453	cellular response to oxygen levels	7.83502e-10	0
biological_process	GO:2001233	regulation of apoptotic signaling pathway	7.87455e-10	0
biological_process	GO:0050896	response to stimulus	8.018e-10	0
biological_process	GO:0006954	inflammatory response	8.1088e-10	0
biological_process	GO:0042325	regulation of phosphorylation	8.22816e-10	0
biological_process	GO:0043549	regulation of kinase activity	8.23082e-10	0
biological_process	GO:0043281	regulation of cysteine-type endopeptidase activity involved in apoptotic process	8.75771e-10	0
biological_process	GO:0043170	macromolecule metabolic process	1.00674e-09	0
biological_process	GO:0036293	response to decreased oxygen levels	1.10548e-09	0
biological_process	GO:0001819	positive regulation of cytokine production	1.1484e-09	0
biological_process	GO:0030097	hemopoiesis	1.15744e-09	0
biological_process	GO:0048519	negative regulation of biological process	1.23015e-09	0
biological_process	GO:0051253	negative regulation of RNA metabolic process	1.26723e-09	0
biological_process	GO:0006082	organic acid metabolic process	1.28561e-09	0
biological_process	GO:0001932	regulation of protein phosphorylation	1.44378e-09	0
biological_process	GO:0042592	homeostatic process	1.57804e-09	0
biological_process	GO:0043123	positive regulation of I-kappaB kinase/NF-kappaB signaling	1.63142e-09	0
biological_process	GO:0045944	positive regulation of transcription by RNA polymerase II	1.72033e-09	0
biological_process	GO:0043903	regulation of symbiosis, encompassing mutualism through parasitism	1.83659e-09	0
cellular_component	GO:1902494	catalytic complex	1.8446e-09	0
biological_process	GO:0043085	positive regulation of catalytic activity	1.93782e-09	0
biological_process	GO:0017144	drug metabolic process	2.17777e-09	0
biological_process	GO:0002252	immune effector process	2.1967e-09	0
biological_process	GO:0051130	positive regulation of cellular component organization	2.24126e-09	0
biological_process	GO:0060333	interferon-gamma-mediated signaling pathway	2.33402e-09	0
cellular_component	GO:0005759	mitochondrial matrix	2.36143e-09	0
biological_process	GO:0030163	protein catabolic process	2.36763e-09	0
biological_process	GO:0031331	positive regulation of cellular catabolic process	2.47456e-09	0
biological_process	GO:0045934	negative regulation of nucleobase-containing compound metabolic process	2.67163e-09	0
biological_process	GO:0072593	reactive oxygen species metabolic process	2.84534e-09	0
biological_process	GO:0001666	response to hypoxia	3.05265e-09	0
biological_process	GO:0002221	pattern recognition receptor signaling pathway	3.10812e-09	0
biological_process	GO:0042127	regulation of cell population proliferation	3.1809e-09	0
biological_process	GO:2000379	positive regulation of reactive oxygen species metabolic process	3.28732e-09	0
biological_process	GO:0051641	cellular localization	3.35881e-09	0
biological_process	GO:0002009	morphogenesis of an epithelium	3.37178e-09	0
biological_process	GO:0097193	intrinsic apoptotic signaling pathway	3.40964e-09	0
biological_process	GO:0036294	cellular response to decreased oxygen levels	3.54718e-09	0
biological_process	GO:0022402	cell cycle process	3.76437e-09	0
biological_process	GO:0033036	macromolecule localization	3.77447e-09	0
biological_process	GO:0045786	negative regulation of cell cycle	3.92023e-09	0
biological_process	GO:0046165	alcohol biosynthetic process	3.94824e-09	0
biological_process	GO:0043069	negative regulation of programmed cell death	4.24494e-09	0
biological_process	GO:0006979	response to oxidative stress	4.30969e-09	0
biological_process	GO:1901617	organic hydroxy compound biosynthetic process	4.53582e-09	0
biological_process	GO:0065007	biological regulation	4.72474e-09	0
cellular_component	GO:0019866	organelle inner membrane	4.74721e-09	0
biological_process	GO:0006629	lipid metabolic process	4.9378e-09	0
biological_process	GO:0071356	cellular response to tumor necrosis factor	5.02719e-09	0
biological_process	GO:0009987	cellular process	5.10989e-09	0
biological_process	GO:0006955	immune response	5.14122e-09	0
biological_process	GO:0071346	cellular response to interferon-gamma	5.37989e-09	0
biological_process	GO:2000116	regulation of cysteine-type endopeptidase activity	5.79633e-09	0
biological_process	GO:0032103	positive regulation of response to external stimulus	5.95469e-09	0
biological_process	GO:0006508	proteolysis	6.12137e-09	0
biological_process	GO:0045321	leukocyte activation	6.33383e-09	0
biological_process	GO:1902105	regulation of leukocyte differentiation	6.69114e-09	0
biological_process	GO:0050792	regulation of viral process	6.72114e-09	0
biological_process	GO:0045859	regulation of protein kinase activity	6.75047e-09	0
biological_process	GO:0050793	regulation of developmental process	6.81176e-09	0
biological_process	GO:1901652	response to peptide	6.83396e-09	0
biological_process	GO:0097191	extrinsic apoptotic signaling pathway	7.08972e-09	0
biological_process	GO:0071216	cellular response to biotic stimulus	7.18076e-09	0
biological_process	GO:0051091	positive regulation of DNA-binding transcription factor activity	8.52069e-09	0
cellular_component	GO:0042175	nuclear outer membrane-endoplasmic reticulum membrane network	9.58758e-09	0
biological_process	GO:0045069	regulation of viral genome replication	1.09854e-08	0
biological_process	GO:0050789	regulation of biological process	1.12361e-08	0
biological_process	GO:0031349	positive regulation of defense response	1.15709e-08	0
biological_process	GO:0051094	positive regulation of developmental process	1.20055e-08	0
biological_process	GO:0033043	regulation of organelle organization	1.22965e-08	0
biological_process	GO:0071456	cellular response to hypoxia	1.31725e-08	0
biological_process	GO:0051347	positive regulation of transferase activity	1.32494e-08	0
biological_process	GO:0030162	regulation of proteolysis	1.34635e-08	0
biological_process	GO:0010498	proteasomal protein catabolic process	1.48509e-08	0
cellular_component	GO:0005743	mitochondrial inner membrane	1.51072e-08	0
biological_process	GO:0043066	negative regulation of apoptotic process	1.54667e-08	0
biological_process	GO:0045619	regulation of lymphocyte differentiation	1.60202e-08	0
biological_process	GO:0071219	cellular response to molecule of bacterial origin	1.66795e-08	0
biological_process	GO:0008202	steroid metabolic process	1.6934e-08	0
molecular_function	GO:0017076	purine nucleotide binding	1.72261e-08	0
biological_process	GO:0031329	regulation of cellular catabolic process	1.90806e-08	0
biological_process	GO:0006066	alcohol metabolic process	1.91305e-08	0
biological_process	GO:0070498	interleukin-1-mediated signaling pathway	1.92293e-08	0
biological_process	GO:0051050	positive regulation of transport	2.03532e-08	0
biological_process	GO:0007050	cell cycle arrest	2.0671e-08	0
biological_process	GO:0032880	regulation of protein localization	2.07845e-08	0
molecular_function	GO:0030554	adenyl nucleotide binding	2.35983e-08	0
biological_process	GO:0032481	positive regulation of type I interferon production	2.57616e-08	0
biological_process	GO:0009894	regulation of catabolic process	2.63479e-08	0
biological_process	GO:0051301	cell division	2.74639e-08	0
cellular_component	GO:0005815	microtubule organizing center	2.77598e-08	0
cellular_component	GO:0005789	endoplasmic reticulum membrane	2.80646e-08	0
biological_process	GO:0044257	cellular protein catabolic process	2.87415e-08	0
biological_process	GO:0009896	positive regulation of catabolic process	3.05985e-08	0
biological_process	GO:0035295	tube development	3.16515e-08	0
biological_process	GO:0008104	protein localization	3.23561e-08	0
biological_process	GO:1903900	regulation of viral life cycle	3.30223e-08	0
biological_process	GO:1902930	regulation of alcohol biosynthetic process	3.3719e-08	0
biological_process	GO:0006986	response to unfolded protein	3.50343e-08	0
biological_process	GO:0046903	secretion	4.16068e-08	0
biological_process	GO:0071495	cellular response to endogenous stimulus	4.24918e-08	0
biological_process	GO:0006695	cholesterol biosynthetic process	4.40932e-08	0
biological_process	GO:0002833	positive regulation of response to biotic stimulus	4.49589e-08	0
biological_process	GO:0062197	cellular response to chemical stress	4.77021e-08	0
biological_process	GO:0071222	cellular response to lipopolysaccharide	4.92281e-08	0
biological_process	GO:0006259	DNA metabolic process	5.05664e-08	0
biological_process	GO:0080135	regulation of cellular response to stress	5.16602e-08	0
biological_process	GO:1902653	secondary alcohol biosynthetic process	6.60416e-08	0
biological_process	GO:0014070	response to organic cyclic compound	6.65612e-08	0
biological_process	GO:0016070	RNA metabolic process	6.70586e-08	0
biological_process	GO:0002521	leukocyte differentiation	6.75411e-08	0
molecular_function	GO:0032555	purine ribonucleotide binding	7.00745e-08	0
biological_process	GO:0035966	response to topologically incorrect protein	7.55465e-08	0
molecular_function	GO:0035639	purine ribonucleoside triphosphate binding	7.79853e-08	0
molecular_function	GO:0032553	ribonucleotide binding	7.86738e-08	0
molecular_function	GO:0043168	anion binding	8.07129e-08	0
biological_process	GO:0000165	MAPK cascade	8.20626e-08	0
biological_process	GO:0051092	positive regulation of NF-kappaB transcription factor activity	8.936e-08	0
molecular_function	GO:0019900	kinase binding	9.20325e-08	0
biological_process	GO:0010638	positive regulation of organelle organization	9.25227e-08	0
biological_process	GO:0023014	signal transduction by protein phosphorylation	9.36687e-08	0
biological_process	GO:0001775	cell activation	9.41749e-08	0
biological_process	GO:0019637	organophosphate metabolic process	1.09349e-07	0
biological_process	GO:0007154	cell communication	1.10615e-07	0
molecular_function	GO:0042802	identical protein binding	1.11341e-07	0
biological_process	GO:0007346	regulation of mitotic cell cycle	1.13165e-07	0
biological_process	GO:0008610	lipid biosynthetic process	1.13855e-07	0
biological_process	GO:0071900	regulation of protein serine/threonine kinase activity	1.19208e-07	0
biological_process	GO:0009314	response to radiation	1.20819e-07	0
molecular_function	GO:0032559	adenyl ribonucleotide binding	1.2226e-07	0
biological_process	GO:0002684	positive regulation of immune system process	1.22525e-07	0
biological_process	GO:0016126	sterol biosynthetic process	1.23224e-07	0
biological_process	GO:0050810	regulation of steroid biosynthetic process	1.27532e-07	0
biological_process	GO:2001234	negative regulation of apoptotic signaling pathway	1.33028e-07	0
biological_process	GO:0010468	regulation of gene expression	1.35414e-07	0
biological_process	GO:0051186	cofactor metabolic process	1.38203e-07	0
biological_process	GO:0019216	regulation of lipid metabolic process	1.54733e-07	0
biological_process	GO:0034599	cellular response to oxidative stress	1.61086e-07	0
biological_process	GO:0051188	cofactor biosynthetic process	1.61649e-07	0
biological_process	GO:0009890	negative regulation of biosynthetic process	1.64014e-07	0
biological_process	GO:1902532	negative regulation of intracellular signal transduction	1.68959e-07	0
biological_process	GO:0072359	circulatory system development	1.73229e-07	0
biological_process	GO:0051603	proteolysis involved in cellular protein catabolic process	1.79119e-07	0
biological_process	GO:0048731	system development	1.79499e-07	0
biological_process	GO:0023052	signaling	1.82562e-07	0
biological_process	GO:0045597	positive regulation of cell differentiation	1.84157e-07	0
biological_process	GO:0048729	tissue morphogenesis	1.89156e-07	0
biological_process	GO:0032940	secretion by cell	1.91658e-07	0
molecular_function	GO:0003690	double-stranded DNA binding	1.92992e-07	0
biological_process	GO:0044403	symbiotic process	1.94636e-07	0
biological_process	GO:0007165	signal transduction	2.07533e-07	0
biological_process	GO:0019079	viral genome replication	2.07676e-07	0
biological_process	GO:0032870	cellular response to hormone stimulus	2.12453e-07	0
molecular_function	GO:0005524	ATP binding	2.16828e-07	0
biological_process	GO:0001934	positive regulation of protein phosphorylation	2.18172e-07	0
biological_process	GO:0010562	positive regulation of phosphorus metabolic process	2.20481e-07	0
biological_process	GO:0045937	positive regulation of phosphate metabolic process	2.20481e-07	0
biological_process	GO:0006694	steroid biosynthetic process	2.20607e-07	0
biological_process	GO:0002683	negative regulation of immune system process	2.29296e-07	0
biological_process	GO:0051179	localization	2.3599e-07	0
molecular_function	GO:1990837	sequence-specific double-stranded DNA binding	2.36026e-07	0
cellular_component	GO:0098798	mitochondrial protein complex	2.53628e-07	0
biological_process	GO:0070997	neuron death	2.60823e-07	0
biological_process	GO:1903708	positive regulation of hemopoiesis	2.73982e-07	0
biological_process	GO:2000113	negative regulation of cellular macromolecule biosynthetic process	2.83715e-07	0
biological_process	GO:0042542	response to hydrogen peroxide	2.90316e-07	0
biological_process	GO:0072358	cardiovascular system development	2.98635e-07	0
biological_process	GO:0035239	tube morphogenesis	3.02198e-07	0
cellular_component	GO:0098803	respiratory chain complex	3.03762e-07	0
biological_process	GO:0001944	vasculature development	3.11711e-07	0
biological_process	GO:0045333	cellular respiration	3.37006e-07	0
biological_process	GO:1901653	cellular response to peptide	3.50361e-07	0
biological_process	GO:0007159	leukocyte cell-cell adhesion	3.53393e-07	0
biological_process	GO:0044772	mitotic cell cycle phase transition	3.548e-07	0
biological_process	GO:0019218	regulation of steroid metabolic process	3.60614e-07	0
molecular_function	GO:0008144	drug binding	3.77894e-07	0
biological_process	GO:0032787	monocarboxylic acid metabolic process	3.78982e-07	0
biological_process	GO:0002367	cytokine production involved in immune response	3.80532e-07	0
biological_process	GO:0140352	export from cell	3.84491e-07	0
biological_process	GO:0042327	positive regulation of phosphorylation	4.07876e-07	0
biological_process	GO:0032879	regulation of localization	4.13773e-07	0
biological_process	GO:0000302	response to reactive oxygen species	4.27121e-07	0
biological_process	GO:2000027	regulation of animal organ morphogenesis	4.3984e-07	0
biological_process	GO:0034620	cellular response to unfolded protein	4.42768e-07	0
biological_process	GO:1901214	regulation of neuron death	4.75297e-07	0
biological_process	GO:0002274	myeloid leukocyte activation	4.82154e-07	0
biological_process	GO:0033674	positive regulation of kinase activity	5.18236e-07	0
cellular_component	GO:0005813	centrosome	5.32402e-07	0
biological_process	GO:0045860	positive regulation of protein kinase activity	5.33897e-07	0
biological_process	GO:0016032	viral process	5.36927e-07	0
biological_process	GO:0055086	nucleobase-containing small molecule metabolic process	5.49219e-07	0
biological_process	GO:2000026	regulation of multicellular organismal development	5.95181e-07	0
biological_process	GO:1901135	carbohydrate derivative metabolic process	6.25552e-07	0
biological_process	GO:1902652	secondary alcohol metabolic process	6.33548e-07	0
biological_process	GO:0031327	negative regulation of cellular biosynthetic process	6.51693e-07	0
molecular_function	GO:0019901	protein kinase binding	6.69681e-07	0
biological_process	GO:0010558	negative regulation of macromolecule biosynthetic process	6.96477e-07	0
biological_process	GO:0045089	positive regulation of innate immune response	7.03411e-07	0
biological_process	GO:0022900	electron transport chain	7.88375e-07	0
molecular_function	GO:0008134	transcription factor binding	7.89989e-07	0
cellular_component	GO:0005746	mitochondrial respirasome	8.17749e-07	0
biological_process	GO:0048661	positive regulation of smooth muscle cell proliferation	8.43726e-07	0
biological_process	GO:0007005	mitochondrion organization	8.59781e-07	0
biological_process	GO:1903037	regulation of leukocyte cell-cell adhesion	8.75226e-07	0
biological_process	GO:2000377	regulation of reactive oxygen species metabolic process	9.40789e-07	0
biological_process	GO:0043161	proteasome-mediated ubiquitin-dependent protein catabolic process	9.42147e-07	0
biological_process	GO:0030098	lymphocyte differentiation	1.02123e-06	0
biological_process	GO:1904951	positive regulation of establishment of protein localization	1.06716e-06	0
biological_process	GO:0000209	protein polyubiquitination	1.12948e-06	0
biological_process	GO:0072331	signal transduction by p53 class mediator	1.1301e-06	0
biological_process	GO:0071897	DNA biosynthetic process	1.14559e-06	0
biological_process	GO:0045540	regulation of cholesterol biosynthetic process	1.16569e-06	0
biological_process	GO:0106118	regulation of sterol biosynthetic process	1.16569e-06	0
biological_process	GO:0035455	response to interferon-alpha	1.19268e-06	0
biological_process	GO:0022603	regulation of anatomical structure morphogenesis	1.19974e-06	0
biological_process	GO:0042176	regulation of protein catabolic process	1.2496e-06	0
biological_process	GO:0006753	nucleoside phosphate metabolic process	1.28783e-06	0
biological_process	GO:0051604	protein maturation	1.30079e-06	0
biological_process	GO:1904018	positive regulation of vasculature development	1.34664e-06	0
biological_process	GO:0048513	animal organ development	1.36375e-06	0
molecular_function	GO:0000976	transcription regulatory region sequence-specific DNA binding	2.10347e-06	0
molecular_function	GO:0044212	transcription regulatory region DNA binding	2.19039e-06	0
molecular_function	GO:0001067	regulatory region nucleic acid binding	2.3957e-06	0
molecular_function	GO:0097367	carbohydrate derivative binding	2.95546e-06	0
molecular_function	GO:0044389	ubiquitin-like protein ligase binding	4.9646e-06	0
molecular_function	GO:0000977	RNA polymerase II regulatory region sequence-specific DNA binding	5.72454e-06	0
molecular_function	GO:0001012	RNA polymerase II regulatory region DNA binding	5.72454e-06	0
molecular_function	GO:0043565	sequence-specific DNA binding	7.29623e-06	0
biological_process	GO:0001568	blood vessel development	1.44372e-06	0.01
biological_process	GO:0045930	negative regulation of mitotic cell cycle	1.47132e-06	0.01
biological_process	GO:0001959	regulation of cytokine-mediated signaling pathway	1.50023e-06	0.01
biological_process	GO:0035967	cellular response to topologically incorrect protein	1.52474e-06	0.01
biological_process	GO:1903409	reactive oxygen species biosynthetic process	1.56717e-06	0.01
biological_process	GO:0060759	regulation of response to cytokine stimulus	1.75656e-06	0.01
biological_process	GO:0043408	regulation of MAPK cascade	1.77094e-06	0.01
biological_process	GO:0008203	cholesterol metabolic process	1.87002e-06	0.01
biological_process	GO:0043433	negative regulation of DNA-binding transcription factor activity	1.87483e-06	0.01
biological_process	GO:0062012	regulation of small molecule metabolic process	1.88301e-06	0.01
biological_process	GO:0009653	anatomical structure morphogenesis	2.0353e-06	0.01
biological_process	GO:0050863	regulation of T cell activation	2.04345e-06	0.01
biological_process	GO:0010564	regulation of cell cycle process	2.10391e-06	0.01
biological_process	GO:0001889	liver development	2.21233e-06	0.01
cellular_component	GO:1990204	oxidoreductase complex	2.21384e-06	0.01
biological_process	GO:0045580	regulation of T cell differentiation	2.25701e-06	0.01
biological_process	GO:2001236	regulation of extrinsic apoptotic signaling pathway	2.34333e-06	0.01
biological_process	GO:0034976	response to endoplasmic reticulum stress	2.53519e-06	0.01
biological_process	GO:0051046	regulation of secretion	2.70052e-06	0.01
biological_process	GO:0009117	nucleotide metabolic process	2.70496e-06	0.01
biological_process	GO:0019941	modification-dependent protein catabolic process	2.72288e-06	0.01
biological_process	GO:0043280	positive regulation of cysteine-type endopeptidase activity involved in apoptotic process	2.73944e-06	0.01
biological_process	GO:1905330	regulation of morphogenesis of an epithelium	2.74251e-06	0.01
biological_process	GO:0042110	T cell activation	2.76413e-06	0.01
biological_process	GO:0002753	cytoplasmic pattern recognition receptor signaling pathway	2.77083e-06	0.01
biological_process	GO:0044770	cell cycle phase transition	2.80601e-06	0.01
biological_process	GO:0034614	cellular response to reactive oxygen species	2.85629e-06	0.01
biological_process	GO:0048545	response to steroid hormone	2.91456e-06	0.01
biological_process	GO:0001101	response to acid chemical	2.94956e-06	0.01
biological_process	GO:0010035	response to inorganic substance	3.14426e-06	0.01
cellular_component	GO:0070469	respirasome	3.15344e-06	0.01
biological_process	GO:0030522	intracellular receptor signaling pathway	3.26364e-06	0.01
cellular_component	GO:0005747	mitochondrial respiratory chain complex I	3.36511e-06	0.01
cellular_component	GO:0030964	NADH dehydrogenase complex	3.36511e-06	0.01
cellular_component	GO:0045271	respiratory chain complex I	3.36511e-06	0.01
biological_process	GO:0048732	gland development	3.44752e-06	0.01
biological_process	GO:0001818	negative regulation of cytokine production	3.57732e-06	0.01
biological_process	GO:0030217	T cell differentiation	3.61401e-06	0.01
biological_process	GO:0046890	regulation of lipid biosynthetic process	3.66094e-06	0.01
biological_process	GO:0046677	response to antibiotic	3.71769e-06	0.01
biological_process	GO:0035456	response to interferon-beta	3.96413e-06	0.01
biological_process	GO:1903530	regulation of secretion by cell	3.97523e-06	0.01
biological_process	GO:0090181	regulation of cholesterol metabolic process	4.02104e-06	0.01
biological_process	GO:0051222	positive regulation of protein transport	4.09021e-06	0.01
biological_process	GO:0010506	regulation of autophagy	4.26677e-06	0.01
biological_process	GO:0043434	response to peptide hormone	4.36537e-06	0.01
biological_process	GO:0007167	enzyme linked receptor protein signaling pathway	4.37432e-06	0.01
biological_process	GO:0061008	hepaticobiliary system development	4.41587e-06	0.01
biological_process	GO:0002224	toll-like receptor signaling pathway	4.46749e-06	0.01
biological_process	GO:0090407	organophosphate biosynthetic process	4.70193e-06	0.01
cellular_component	GO:0005856	cytoskeleton	4.78501e-06	0.01
biological_process	GO:0038061	NIK/NF-kappaB signaling	4.89757e-06	0.01
biological_process	GO:0051049	regulation of transport	4.90787e-06	0.01
biological_process	GO:0043632	modification-dependent macromolecule catabolic process	5.00892e-06	0.01
biological_process	GO:0071902	positive regulation of protein serine/threonine kinase activity	5.27935e-06	0.01
biological_process	GO:0000086	G2/M transition of mitotic cell cycle	5.61366e-06	0.01
biological_process	GO:0044092	negative regulation of molecular function	5.7329e-06	0.01
biological_process	GO:0071229	cellular response to acid chemical	5.86704e-06	0.01
biological_process	GO:0009636	response to toxic substance	5.99691e-06	0.01
biological_process	GO:0034644	cellular response to UV	6.09397e-06	0.01
biological_process	GO:0040007	growth	6.17751e-06	0.01
biological_process	GO:0042775	mitochondrial ATP synthesis coupled electron transport	6.40829e-06	0.01
biological_process	GO:1901991	negative regulation of mitotic cell cycle phase transition	6.57244e-06	0.01
biological_process	GO:0006919	activation of cysteine-type endopeptidase activity involved in apoptotic process	6.72768e-06	0.01
biological_process	GO:0050708	regulation of protein secretion	6.81464e-06	0.01
biological_process	GO:1903364	positive regulation of cellular protein catabolic process	6.87228e-06	0.01
biological_process	GO:0007275	multicellular organism development	6.93742e-06	0.01
cellular_component	GO:0097708	intracellular vesicle	7.66491e-06	0.01
cellular_component	GO:0031410	cytoplasmic vesicle	8.54466e-06	0.01
molecular_function	GO:0000987	cis-regulatory region sequence-specific DNA binding	1.07065e-05	0.01
molecular_function	GO:0035326	cis-regulatory region binding	1.07065e-05	0.01
cellular_component	GO:0005874	microtubule	1.15601e-05	0.01
cellular_component	GO:0098687	chromosomal region	1.19738e-05	0.01
molecular_function	GO:0048037	cofactor binding	1.29638e-05	0.01
cellular_component	GO:0031982	vesicle	1.29732e-05	0.01
molecular_function	GO:0016655	oxidoreductase activity, acting on NAD(P)H, quinone or similar compound as acceptor	1.35683e-05	0.01
cellular_component	GO:0101031	chaperone complex	1.57717e-05	0.01
molecular_function	GO:0001217	DNA-binding transcription repressor activity	1.90997e-05	0.01
molecular_function	GO:0001227	DNA-binding transcription repressor activity, RNA polymerase II-specific	1.90997e-05	0.01
cellular_component	GO:0016604	nuclear body	1.97048e-05	0.01
cellular_component	GO:0005794	Golgi apparatus	2.89042e-05	0.01
cellular_component	GO:1990234	transferase complex	4.55114e-05	0.01
cellular_component	GO:0098588	bounding membrane of organelle	6.94799e-05	0.01
biological_process	GO:0042326	negative regulation of phosphorylation	7.28469e-06	0.02
biological_process	GO:0070423	nucleotide-binding oligomerization domain containing signaling pathway	7.43661e-06	0.02
biological_process	GO:0000727	double-strand break repair via break-induced replication	7.63084e-06	0.02
biological_process	GO:0070201	regulation of establishment of protein localization	7.65011e-06	0.02
biological_process	GO:0043405	regulation of MAP kinase activity	7.85966e-06	0.02
biological_process	GO:0009617	response to bacterium	7.94786e-06	0.02
biological_process	GO:0042773	ATP synthesis coupled electron transport	8.38843e-06	0.02
biological_process	GO:2001056	positive regulation of cysteine-type endopeptidase activity	8.44543e-06	0.02
biological_process	GO:0006511	ubiquitin-dependent protein catabolic process	9.35329e-06	0.03
biological_process	GO:0006120	mitochondrial electron transport, NADH to ubiquinone	9.39451e-06	0.03
biological_process	GO:0048872	homeostasis of number of cells	9.41754e-06	0.03
biological_process	GO:0071702	organic substance transport	9.50893e-06	0.03
biological_process	GO:0009991	response to extracellular stimulus	9.66926e-06	0.03
biological_process	GO:0016125	sterol metabolic process	9.72215e-06	0.03
biological_process	GO:0006520	cellular amino acid metabolic process	1.02346e-05	0.03
biological_process	GO:0051403	stress-activated MAPK cascade	1.05573e-05	0.03
biological_process	GO:0051223	regulation of protein transport	1.05686e-05	0.03
biological_process	GO:0009057	macromolecule catabolic process	1.08144e-05	0.03
biological_process	GO:0002718	regulation of cytokine production involved in immune response	1.10006e-05	0.03
biological_process	GO:0043154	negative regulation of cysteine-type endopeptidase activity involved in apoptotic process	1.10006e-05	0.03
biological_process	GO:0060562	epithelial tube morphogenesis	1.14127e-05	0.03
biological_process	GO:0072413	signal transduction involved in mitotic cell cycle checkpoint	1.15582e-05	0.03
biological_process	GO:1902402	signal transduction involved in mitotic DNA damage checkpoint	1.15582e-05	0.03
biological_process	GO:1902403	signal transduction involved in mitotic DNA integrity checkpoint	1.15582e-05	0.03
biological_process	GO:0031400	negative regulation of protein modification process	1.20582e-05	0.03
biological_process	GO:0008284	positive regulation of cell population proliferation	1.21017e-05	0.03
biological_process	GO:0002755	MyD88-dependent toll-like receptor signaling pathway	1.23734e-05	0.03
biological_process	GO:0035872	nucleotide-binding domain, leucine rich repeat containing receptor signaling pathway	1.23734e-05	0.03
biological_process	GO:0032757	positive regulation of interleukin-8 production	1.26137e-05	0.03
biological_process	GO:0044265	cellular macromolecule catabolic process	1.28559e-05	0.03
biological_process	GO:0002262	myeloid cell homeostasis	1.28671e-05	0.03
biological_process	GO:1903039	positive regulation of leukocyte cell-cell adhesion	1.30607e-05	0.03
biological_process	GO:0045732	positive regulation of protein catabolic process	1.3645e-05	0.03
biological_process	GO:0030155	regulation of cell adhesion	1.38335e-05	0.03
biological_process	GO:0050776	regulation of immune response	1.3905e-05	0.03
biological_process	GO:0044085	cellular component biogenesis	1.40103e-05	0.03
biological_process	GO:0071417	cellular response to organonitrogen compound	1.40996e-05	0.03
cellular_component	GO:0034399	nuclear periphery	9.60562e-05	0.03
biological_process	GO:0051047	positive regulation of secretion	1.41686e-05	0.04
biological_process	GO:1901699	cellular response to nitrogen compound	1.45932e-05	0.04
biological_process	GO:0045595	regulation of cell differentiation	1.46803e-05	0.04
biological_process	GO:1901800	positive regulation of proteasomal protein catabolic process	1.4692e-05	0.04
biological_process	GO:2001237	negative regulation of extrinsic apoptotic signaling pathway	1.4692e-05	0.04
biological_process	GO:0032677	regulation of interleukin-8 production	1.48825e-05	0.04
biological_process	GO:0007584	response to nutrient	1.53507e-05	0.04
biological_process	GO:0050727	regulation of inflammatory response	1.55899e-05	0.04
biological_process	GO:1902107	positive regulation of leukocyte differentiation	1.59602e-05	0.04
biological_process	GO:0042108	positive regulation of cytokine biosynthetic process	1.59613e-05	0.04
biological_process	GO:0051101	regulation of DNA binding	1.62152e-05	0.04
biological_process	GO:0042493	response to drug	1.68583e-05	0.04
biological_process	GO:0090087	regulation of peptide transport	1.72964e-05	0.04
cellular_component	GO:0031227	intrinsic component of endoplasmic reticulum membrane	0.000124152	0.04
cellular_component	GO:0030176	integral component of endoplasmic reticulum membrane	0.000137773	0.04
cellular_component	GO:0016607	nuclear speck	0.00013861	0.04
molecular_function	GO:0016772	transferase activity, transferring phosphorus-containing groups	5.93745e-05	0.05
biological_process	GO:2001242	regulation of intrinsic apoptotic signaling pathway	1.76128e-05	0.06
biological_process	GO:0007568	aging	1.79212e-05	0.06
biological_process	GO:0071496	cellular response to external stimulus	1.80038e-05	0.06
biological_process	GO:0002791	regulation of peptide secretion	1.8413e-05	0.06
molecular_function	GO:0000978	RNA polymerase II cis-regulatory region sequence-specific DNA binding	6.11342e-05	0.06
cellular_component	GO:0005694	chromosome	0.00014561	0.06
biological_process	GO:0018105	peptidyl-serine phosphorylation	1.86733e-05	0.07
biological_process	GO:1903532	positive regulation of secretion by cell	1.88352e-05	0.07
biological_process	GO:0006732	coenzyme metabolic process	1.89387e-05	0.07
biological_process	GO:0010257	NADH dehydrogenase complex assembly	1.92387e-05	0.07
biological_process	GO:0032981	mitochondrial respiratory chain complex I assembly	1.92387e-05	0.07
biological_process	GO:0010950	positive regulation of endopeptidase activity	1.93346e-05	0.07
biological_process	GO:0072431	signal transduction involved in mitotic G1 DNA damage checkpoint	1.95708e-05	0.07
biological_process	GO:1902400	intracellular signal transduction involved in G1 DNA damage checkpoint	1.95708e-05	0.07
biological_process	GO:1903428	positive regulation of reactive oxygen species biosynthetic process	1.95708e-05	0.07
biological_process	GO:0043200	response to amino acid	1.9664e-05	0.07
biological_process	GO:0009411	response to UV	1.97992e-05	0.07
biological_process	GO:0071214	cellular response to abiotic stimulus	2.0409e-05	0.07
biological_process	GO:0104004	cellular response to environmental stimulus	2.0409e-05	0.07
biological_process	GO:1903362	regulation of cellular protein catabolic process	2.10821e-05	0.07
biological_process	GO:1901137	carbohydrate derivative biosynthetic process	2.11793e-05	0.07
biological_process	GO:0045766	positive regulation of angiogenesis	2.15686e-05	0.07
biological_process	GO:0001822	kidney development	2.18795e-05	0.07
biological_process	GO:0009416	response to light stimulus	2.30474e-05	0.07
molecular_function	GO:0031625	ubiquitin protein ligase binding	7.87488e-05	0.07
molecular_function	GO:0016651	oxidoreductase activity, acting on NAD(P)H	0.000104383	0.07
molecular_function	GO:0016301	kinase activity	0.00010828	0.07
biological_process	GO:0051098	regulation of binding	2.3692e-05	0.08
biological_process	GO:0046394	carboxylic acid biosynthetic process	2.42457e-05	0.08
biological_process	GO:0071383	cellular response to steroid hormone stimulus	2.44097e-05	0.08
biological_process	GO:0045936	negative regulation of phosphate metabolic process	2.44292e-05	0.08
biological_process	GO:0046777	protein autophosphorylation	2.46765e-05	0.08
biological_process	GO:1904407	positive regulation of nitric oxide metabolic process	2.48963e-05	0.08
biological_process	GO:0034101	erythrocyte homeostasis	2.50929e-05	0.08
biological_process	GO:0033209	tumor necrosis factor-mediated signaling pathway	2.5478e-05	0.08
biological_process	GO:0001933	negative regulation of protein phosphorylation	2.6174e-05	0.08
biological_process	GO:0032147	activation of protein kinase activity	2.61749e-05	0.08
biological_process	GO:0031098	stress-activated protein kinase signaling cascade	2.61871e-05	0.08
biological_process	GO:0051276	chromosome organization	2.63335e-05	0.08
biological_process	GO:0010563	negative regulation of phosphorus metabolic process	2.6765e-05	0.08
biological_process	GO:0042330	taxis	2.68017e-05	0.08
biological_process	GO:0016053	organic acid biosynthetic process	2.73124e-05	0.08
molecular_function	GO:0003676	nucleic acid binding	0.000116731	0.08
molecular_function	GO:0003954	NADH dehydrogenase activity	0.000124377	0.08
molecular_function	GO:0008137	NADH dehydrogenase (ubiquinone) activity	0.000124377	0.08
molecular_function	GO:0050136	NADH dehydrogenase (quinone) activity	0.000124377	0.08
molecular_function	GO:0000287	magnesium ion binding	0.000128769	0.08
molecular_function	GO:0001221	transcription cofactor binding	0.000140726	0.08
cellular_component	GO:0098800	inner mitochondrial membrane protein complex	0.000199546	0.08
biological_process	GO:0046649	lymphocyte activation	2.7717e-05	0.09
biological_process	GO:0031663	lipopolysaccharide-mediated signaling pathway	2.772e-05	0.09
biological_process	GO:0000070	mitotic sister chromatid segregation	2.83746e-05	0.09
biological_process	GO:0051234	establishment of localization	2.84886e-05	0.09
biological_process	GO:0030099	myeloid cell differentiation	2.87185e-05	0.09
biological_process	GO:0010948	negative regulation of cell cycle process	2.88021e-05	0.09
biological_process	GO:0070301	cellular response to hydrogen peroxide	2.884e-05	0.09
biological_process	GO:0006839	mitochondrial transport	2.91158e-05	0.09
biological_process	GO:1902850	microtubule cytoskeleton organization involved in mitosis	3.0813e-05	0.09
biological_process	GO:0045785	positive regulation of cell adhesion	3.14511e-05	0.09
biological_process	GO:0006470	protein dephosphorylation	3.16349e-05	0.09
biological_process	GO:0032350	regulation of hormone metabolic process	3.16995e-05	0.09
biological_process	GO:1905898	positive regulation of response to endoplasmic reticulum stress	3.16995e-05	0.09
biological_process	GO:0044282	small molecule catabolic process	3.26468e-05	0.09
biological_process	GO:1903557	positive regulation of tumor necrosis factor superfamily cytokine production	3.29568e-05	0.09
biological_process	GO:0006935	chemotaxis	3.40531e-05	0.1
biological_process	GO:0050714	positive regulation of protein secretion	3.42714e-05	0.1
biological_process	GO:2000117	negative regulation of cysteine-type endopeptidase activity	3.44682e-05	0.1
cellular_component	GO:0005758	mitochondrial intermembrane space	0.000300086	0.11
biological_process	GO:0009262	deoxyribonucleotide metabolic process	3.49393e-05	0.13
biological_process	GO:0015980	energy derivation by oxidation of organic compounds	3.5337e-05	0.13
biological_process	GO:0022409	positive regulation of cell-cell adhesion	3.54654e-05	0.13
biological_process	GO:0018209	peptidyl-serine modification	3.58057e-05	0.13
biological_process	GO:0140014	mitotic nuclear division	3.63257e-05	0.13
biological_process	GO:0048660	regulation of smooth muscle cell proliferation	3.64667e-05	0.13
biological_process	GO:0009888	tissue development	3.67763e-05	0.13
biological_process	GO:0006260	DNA replication	3.70131e-05	0.13
biological_process	GO:0051336	regulation of hydrolase activity	3.75725e-05	0.13
biological_process	GO:0044255	cellular lipid metabolic process	3.76541e-05	0.13
biological_process	GO:0071156	regulation of cell cycle arrest	3.81356e-05	0.13
biological_process	GO:0030030	cell projection organization	3.82536e-05	0.13
biological_process	GO:0050866	negative regulation of cell activation	3.83647e-05	0.13
biological_process	GO:0001736	establishment of planar polarity	3.85451e-05	0.13
biological_process	GO:0007164	establishment of tissue polarity	3.85451e-05	0.13
biological_process	GO:0010508	positive regulation of autophagy	3.86966e-05	0.13
biological_process	GO:1903052	positive regulation of proteolysis involved in cellular protein catabolic process	3.86966e-05	0.13
biological_process	GO:0070727	cellular macromolecule localization	3.93598e-05	0.13
cellular_component	GO:0098805	whole membrane	0.000321642	0.13
cellular_component	GO:0099503	secretory vesicle	0.000337609	0.13
biological_process	GO:0016051	carbohydrate biosynthetic process	4.08827e-05	0.14
biological_process	GO:0043009	chordate embryonic development	4.10024e-05	0.14
molecular_function	GO:0043425	bHLH transcription factor binding	0.000216219	0.14
cellular_component	GO:0031970	organelle envelope lumen	0.000369273	0.14
biological_process	GO:0009750	response to fructose	4.11825e-05	0.15
molecular_function	GO:0016740	transferase activity	0.000219723	0.15
cellular_component	GO:0043230	extracellular organelle	0.000407513	0.15
biological_process	GO:0031667	response to nutrient levels	4.2084e-05	0.16
biological_process	GO:0019058	viral life cycle	4.28759e-05	0.16
biological_process	GO:1900182	positive regulation of protein localization to nucleus	4.41039e-05	0.16
biological_process	GO:0033002	muscle cell proliferation	4.43862e-05	0.16
cellular_component	GO:0005783	endoplasmic reticulum	0.000436978	0.16
cellular_component	GO:0000228	nuclear chromosome	0.000447126	0.16
biological_process	GO:0016567	protein ubiquitination	4.51505e-05	0.17
biological_process	GO:0018193	peptidyl-amino acid modification	4.53699e-05	0.17
biological_process	GO:1903829	positive regulation of cellular protein localization	4.57146e-05	0.17
biological_process	GO:0022607	cellular component assembly	4.57787e-05	0.17
biological_process	GO:0022407	regulation of cell-cell adhesion	4.65949e-05	0.17
molecular_function	GO:0004672	protein kinase activity	0.000246955	0.17
cellular_component	GO:0070062	extracellular exosome	0.000476177	0.17
biological_process	GO:0031960	response to corticosteroid	4.6638e-05	0.18
biological_process	GO:0006977	DNA damage response, signal transduction by p53 class mediator resulting in cell cycle arrest	4.66676e-05	0.18
biological_process	GO:0071705	nitrogen compound transport	4.6933e-05	0.18
biological_process	GO:0034404	nucleobase-containing small molecule biosynthetic process	4.73511e-05	0.19
biological_process	GO:0072332	intrinsic apoptotic signaling pathway by p53 class mediator	4.74002e-05	0.19
biological_process	GO:1901990	regulation of mitotic cell cycle phase transition	4.75645e-05	0.19
biological_process	GO:0044839	cell cycle G2/M phase transition	4.76801e-05	0.19
biological_process	GO:2001235	positive regulation of apoptotic signaling pathway	4.77018e-05	0.19
biological_process	GO:0030968	endoplasmic reticulum unfolded protein response	4.78682e-05	0.19
biological_process	GO:1901222	regulation of NIK/NF-kappaB signaling	4.80626e-05	0.19
biological_process	GO:0051649	establishment of localization in cell	4.81838e-05	0.19
biological_process	GO:0032637	interleukin-8 production	5.02996e-05	0.19
biological_process	GO:0071158	positive regulation of cell cycle arrest	5.02996e-05	0.19
biological_process	GO:0060429	epithelium development	5.04755e-05	0.19
biological_process	GO:0009792	embryo development ending in birth or egg hatching	5.10414e-05	0.19
biological_process	GO:0034613	cellular protein localization	5.1289e-05	0.19
biological_process	GO:0048659	smooth muscle cell proliferation	5.16601e-05	0.19
biological_process	GO:0051250	negative regulation of lymphocyte activation	5.26512e-05	0.19
biological_process	GO:0051384	response to glucocorticoid	5.26512e-05	0.19
biological_process	GO:0032760	positive regulation of tumor necrosis factor production	5.27912e-05	0.19
biological_process	GO:1903050	regulation of proteolysis involved in cellular protein catabolic process	5.28434e-05	0.19
biological_process	GO:0010952	positive regulation of peptidase activity	5.52628e-05	0.19
biological_process	GO:0009308	amine metabolic process	5.52657e-05	0.19
biological_process	GO:0048856	anatomical structure development	5.56487e-05	0.19
biological_process	GO:1901216	positive regulation of neuron death	5.65609e-05	0.19
biological_process	GO:0032502	developmental process	5.72201e-05	0.19
biological_process	GO:0007259	receptor signaling pathway via JAK-STAT	5.76509e-05	0.19
biological_process	GO:1901654	response to ketone	5.79425e-05	0.19
biological_process	GO:0090175	regulation of establishment of planar polarity	5.97007e-05	0.19
biological_process	GO:0030218	erythrocyte differentiation	5.97079e-05	0.19
molecular_function	GO:0031072	heat shock protein binding	0.00025062	0.19
biological_process	GO:0043410	positive regulation of MAPK cascade	6.33401e-05	0.2
biological_process	GO:0045184	establishment of protein localization	6.36915e-05	0.2
biological_process	GO:0045429	positive regulation of nitric oxide biosynthetic process	6.40426e-05	0.21
molecular_function	GO:0050662	coenzyme binding	0.000258443	0.21
biological_process	GO:0061082	myeloid leukocyte cytokine production	6.5941e-05	0.22
biological_process	GO:0036499	PERK-mediated unfolded protein response	6.63971e-05	0.23
biological_process	GO:0051249	regulation of lymphocyte activation	6.69165e-05	0.23
biological_process	GO:0051272	positive regulation of cellular component movement	6.80156e-05	0.23
biological_process	GO:0021915	neural tube development	6.87631e-05	0.23
biological_process	GO:0050865	regulation of cell activation	6.92849e-05	0.23
biological_process	GO:0033081	regulation of T cell differentiation in thymus	6.97956e-05	0.23
biological_process	GO:0002694	regulation of leukocyte activation	7.01169e-05	0.24
biological_process	GO:0007267	cell-cell signaling	7.05966e-05	0.25
biological_process	GO:0002444	myeloid leukocyte mediated immunity	7.07114e-05	0.25
biological_process	GO:0050673	epithelial cell proliferation	7.13604e-05	0.25
biological_process	GO:0032392	DNA geometric change	7.32556e-05	0.25
biological_process	GO:0052548	regulation of endopeptidase activity	7.38806e-05	0.25
biological_process	GO:0071548	response to dexamethasone	7.41602e-05	0.26
biological_process	GO:0060341	regulation of cellular localization	7.44054e-05	0.26
biological_process	GO:0009306	protein secretion	7.54179e-05	0.26
biological_process	GO:0035148	tube formation	7.61701e-05	0.26
biological_process	GO:0043392	negative regulation of DNA binding	7.84565e-05	0.26
biological_process	GO:0051353	positive regulation of oxidoreductase activity	7.84565e-05	0.26
biological_process	GO:0120036	plasma membrane bounded cell projection organization	8.06001e-05	0.26
biological_process	GO:0009166	nucleotide catabolic process	8.14093e-05	0.26
biological_process	GO:0035592	establishment of protein localization to extracellular region	8.20869e-05	0.26
biological_process	GO:0051402	neuron apoptotic process	8.24536e-05	0.26
biological_process	GO:0006810	transport	8.30672e-05	0.26
biological_process	GO:0006270	DNA replication initiation	8.49489e-05	0.26
biological_process	GO:0031111	negative regulation of microtubule polymerization or depolymerization	8.49489e-05	0.26
biological_process	GO:0072001	renal system development	8.60849e-05	0.26
biological_process	GO:0071407	cellular response to organic cyclic compound	8.75407e-05	0.26
biological_process	GO:0001838	embryonic epithelial tube formation	8.84969e-05	0.26
biological_process	GO:1902041	regulation of extrinsic apoptotic signaling pathway via death domain receptors	8.94946e-05	0.26
molecular_function	GO:0071889	14-3-3 protein binding	0.000345065	0.26
molecular_function	GO:0017116	single-stranded DNA helicase activity	0.000359139	0.26
cellular_component	GO:0000796	condensin complex	0.000605283	0.26
cellular_component	GO:0048471	perinuclear region of cytoplasm	0.000618637	0.26
cellular_component	GO:1903561	extracellular vesicle	0.000621995	0.26
cellular_component	GO:0005819	spindle	0.000717531	0.26
biological_process	GO:0033108	mitochondrial respiratory chain complex assembly	9.07554e-05	0.27
biological_process	GO:0061136	regulation of proteasomal protein catabolic process	9.17179e-05	0.27
biological_process	GO:1903320	regulation of protein modification by small protein conjugation or removal	9.2572e-05	0.27
biological_process	GO:0071375	cellular response to peptide hormone stimulus	9.41516e-05	0.27
biological_process	GO:0072401	signal transduction involved in DNA integrity checkpoint	9.47032e-05	0.27
biological_process	GO:0072422	signal transduction involved in DNA damage checkpoint	9.47032e-05	0.27
biological_process	GO:0048514	blood vessel morphogenesis	9.70915e-05	0.27
biological_process	GO:0043406	positive regulation of MAP kinase activity	9.70963e-05	0.27
biological_process	GO:0001738	morphogenesis of a polarized epithelium	9.72561e-05	0.27
biological_process	GO:0070585	protein localization to mitochondrion	9.72561e-05	0.27
biological_process	GO:1901988	negative regulation of cell cycle phase transition	9.77031e-05	0.27
biological_process	GO:0051348	negative regulation of transferase activity	9.77576e-05	0.27
biological_process	GO:0001946	lymphangiogenesis	9.78972e-05	0.27
biological_process	GO:0070059	intrinsic apoptotic signaling pathway in response to endoplasmic reticulum stress	9.9672e-05	0.27
biological_process	GO:1901224	positive regulation of NIK/NF-kappaB signaling	0.000100035	0.27
biological_process	GO:0072655	establishment of protein localization to mitochondrion	0.000100136	0.27
biological_process	GO:0070371	ERK1 and ERK2 cascade	0.000100519	0.27
biological_process	GO:0045055	regulated exocytosis	0.000101993	0.27
biological_process	GO:0006575	cellular modified amino acid metabolic process	0.000102248	0.27
biological_process	GO:0045444	fat cell differentiation	0.000103795	0.27
biological_process	GO:0007399	nervous system development	0.000104903	0.28
biological_process	GO:0010634	positive regulation of epithelial cell migration	0.000105274	0.28
biological_process	GO:0043523	regulation of neuron apoptotic process	0.000106341	0.28
molecular_function	GO:0070851	growth factor receptor binding	0.000434403	0.28
molecular_function	GO:0009055	electron transfer activity	0.000440835	0.28
molecular_function	GO:0004674	protein serine/threonine kinase activity	0.000452391	0.28
molecular_function	GO:0042803	protein homodimerization activity	0.000491268	0.28
cellular_component	GO:0020005	symbiont-containing vacuole membrane	0.000870968	0.28
biological_process	GO:0009394	2'-deoxyribonucleotide metabolic process	0.000106553	0.29
biological_process	GO:0016331	morphogenesis of embryonic epithelium	0.000108891	0.3
biological_process	GO:1901566	organonitrogen compound biosynthetic process	0.000108965	0.3
molecular_function	GO:0140297	DNA-binding transcription factor binding	0.00055342	0.3
biological_process	GO:0002366	leukocyte activation involved in immune response	0.00011035	0.31
biological_process	GO:0062207	regulation of pattern recognition receptor signaling pathway	0.000112786	0.31
biological_process	GO:0061458	reproductive system development	0.000113471	0.32
biological_process	GO:0072330	monocarboxylic acid biosynthetic process	0.000114911	0.32
cellular_component	GO:0000779	condensed chromosome, centromeric region	0.000904983	0.32
cellular_component	GO:0061695	transferase complex, transferring phosphorus-containing groups	0.000913801	0.32
biological_process	GO:0036303	lymph vessel morphogenesis	0.000115075	0.33
biological_process	GO:1900409	positive regulation of cellular response to oxidative stress	0.000115075	0.33
biological_process	GO:2000108	positive regulation of leukocyte apoptotic process	0.00011557	0.33
biological_process	GO:0040008	regulation of growth	0.000121076	0.33
biological_process	GO:0001945	lymph vessel development	0.000121465	0.33
biological_process	GO:1900101	regulation of endoplasmic reticulum unfolded protein response	0.000121465	0.33
molecular_function	GO:0044877	protein-containing complex binding	0.000647785	0.34
molecular_function	GO:0003678	DNA helicase activity	0.00069405	0.34
molecular_function	GO:0030234	enzyme regulator activity	0.000699336	0.34
cellular_component	GO:0012506	vesicle membrane	0.000950325	0.34
biological_process	GO:0048305	immunoglobulin secretion	0.000122138	0.35
biological_process	GO:0030335	positive regulation of cell migration	0.000122861	0.35
biological_process	GO:2000147	positive regulation of cell motility	0.000123106	0.35
biological_process	GO:0072395	signal transduction involved in cell cycle checkpoint	0.000123771	0.35
biological_process	GO:0043491	protein kinase B signaling	0.000125896	0.35
biological_process	GO:0007169	transmembrane receptor protein tyrosine kinase signaling pathway	0.000130459	0.35
molecular_function	GO:0140096	catalytic activity, acting on a protein	0.000742058	0.35
biological_process	GO:0097237	cellular response to toxic substance	0.000132932	0.36
biological_process	GO:0031571	mitotic G1 DNA damage checkpoint	0.000133759	0.37
biological_process	GO:0044819	mitotic G1/S transition checkpoint	0.000133759	0.37
biological_process	GO:0048608	reproductive structure development	0.000133847	0.37
biological_process	GO:0006094	gluconeogenesis	0.000134124	0.37
biological_process	GO:0010212	response to ionizing radiation	0.000134602	0.37
biological_process	GO:0008625	extrinsic apoptotic signaling pathway via death domain receptors	0.000137666	0.38
biological_process	GO:0070542	response to fatty acid	0.000137666	0.38
biological_process	GO:0032508	DNA duplex unwinding	0.000140563	0.38
biological_process	GO:0002456	T cell mediated immunity	0.000141859	0.38
biological_process	GO:0002700	regulation of production of molecular mediator of immune response	0.000144413	0.38
biological_process	GO:0070304	positive regulation of stress-activated protein kinase signaling cascade	0.000145301	0.38
biological_process	GO:0071692	protein localization to extracellular region	0.000146372	0.38
biological_process	GO:0006887	exocytosis	0.000146487	0.38
biological_process	GO:0007017	microtubule-based process	0.000146826	0.38
biological_process	GO:0034142	toll-like receptor 4 signaling pathway	0.000147387	0.38
biological_process	GO:0050778	positive regulation of immune response	0.000148765	0.38
biological_process	GO:0002263	cell activation involved in immune response	0.00014877	0.38
biological_process	GO:0070302	regulation of stress-activated protein kinase signaling cascade	0.000150156	0.38
biological_process	GO:0033673	negative regulation of kinase activity	0.000151995	0.38
biological_process	GO:1901292	nucleoside phosphate catabolic process	0.000153122	0.38
biological_process	GO:0002790	peptide secretion	0.000156116	0.38
molecular_function	GO:0031434	mitogen-activated protein kinase kinase binding	0.000883066	0.38
cellular_component	GO:0033256	I-kappaB/NF-kappaB complex	0.00096569	0.39
cellular_component	GO:0000784	nuclear chromosome, telomeric region	0.00100777	0.39
biological_process	GO:0042090	interleukin-12 biosynthetic process	0.000156256	0.4
biological_process	GO:0045075	regulation of interleukin-12 biosynthetic process	0.000156256	0.4
biological_process	GO:0042886	amide transport	0.000158286	0.4
biological_process	GO:0007093	mitotic cell cycle checkpoint	0.00015955	0.4
biological_process	GO:0022008	neurogenesis	0.000159864	0.4
biological_process	GO:0048871	multicellular organismal homeostasis	0.000160563	0.4
biological_process	GO:0006281	DNA repair	0.000161253	0.4
biological_process	GO:0071478	cellular response to radiation	0.000161384	0.4
biological_process	GO:0042089	cytokine biosynthetic process	0.000162319	0.4
biological_process	GO:0033260	nuclear DNA replication	0.00016426	0.42
biological_process	GO:0090342	regulation of cell aging	0.00016426	0.42
biological_process	GO:0006091	generation of precursor metabolites and energy	0.000166842	0.42
molecular_function	GO:0098772	molecular function regulator	0.00097683	0.42
cellular_component	GO:0000922	spindle pole	0.00116674	0.42
biological_process	GO:0030330	DNA damage response, signal transduction by p53 class mediator	0.000174755	0.43
biological_process	GO:0045639	positive regulation of myeloid cell differentiation	0.000176382	0.44
biological_process	GO:0042116	macrophage activation	0.000177342	0.44
biological_process	GO:0044783	G1 DNA damage checkpoint	0.000177816	0.44
biological_process	GO:0032446	protein modification by small protein conjugation	0.000177981	0.44
biological_process	GO:0030195	negative regulation of blood coagulation	0.000181406	0.44
biological_process	GO:0038066	p38MAPK cascade	0.000181406	0.44
biological_process	GO:0050702	interleukin-1 beta secretion	0.000181406	0.44
biological_process	GO:0006914	autophagy	0.000182937	0.44
biological_process	GO:0061919	process utilizing autophagic mechanism	0.000182937	0.44
biological_process	GO:0050678	regulation of epithelial cell proliferation	0.000184494	0.44
biological_process	GO:0072175	epithelial tube formation	0.000184774	0.44
cellular_component	GO:0000315	organellar large ribosomal subunit	0.00120637	0.44
cellular_component	GO:0005762	mitochondrial large ribosomal subunit	0.00120637	0.44
cellular_component	GO:0005773	vacuole	0.00131914	0.46
cellular_component	GO:0000775	chromosome, centromeric region	0.00143136	0.47
molecular_function	GO:0005125	cytokine activity	0.0010397	0.48
molecular_function	GO:0005126	cytokine receptor binding	0.00105718	0.48
molecular_function	GO:0031690	adrenergic receptor binding	0.00105753	0.49
molecular_function	GO:0070182	DNA polymerase binding	0.00105753	0.49
molecular_function	GO:0043028	cysteine-type endopeptidase regulator activity involved in apoptotic process	0.00106473	0.49
molecular_function	GO:0016614	oxidoreductase activity, acting on CH-OH group of donors	0.00124522	0.49
biological_process	GO:1901490	regulation of lymphangiogenesis	0.000188889	0.52
biological_process	GO:0048699	generation of neurons	0.000190411	0.52
biological_process	GO:0051248	negative regulation of protein metabolic process	0.000190538	0.52
biological_process	GO:0040017	positive regulation of locomotion	0.000191363	0.52
biological_process	GO:0006984	ER-nucleus signaling pathway	0.0001916	0.52
biological_process	GO:0032480	negative regulation of type I interferon production	0.0001916	0.52
biological_process	GO:0042107	cytokine metabolic process	0.00019619	0.54
biological_process	GO:0070647	protein modification by small protein conjugation or removal	0.000198039	0.54
biological_process	GO:0002695	negative regulation of leukocyte activation	0.000198666	0.54
cellular_component	GO:1990124	messenger ribonucleoprotein complex	0.00154381	0.54
cellular_component	GO:0000313	organellar ribosome	0.0016086	0.54
cellular_component	GO:0005761	mitochondrial ribosome	0.0016086	0.54
biological_process	GO:0006271	DNA strand elongation involved in DNA replication	0.000199318	0.55
biological_process	GO:0050665	hydrogen peroxide biosynthetic process	0.000199318	0.55
biological_process	GO:1903209	positive regulation of oxidative stress-induced cell death	0.000199318	0.55
biological_process	GO:1904996	positive regulation of leukocyte adhesion to vascular endothelial cell	0.000199318	0.55
biological_process	GO:0015833	peptide transport	0.000199433	0.55
cellular_component	GO:0016363	nuclear matrix	0.0017646	0.56
biological_process	GO:0006267	pre-replicative complex assembly involved in nuclear cell cycle DNA replication	0.000201157	0.58
biological_process	GO:0032762	mast cell cytokine production	0.000201157	0.58
biological_process	GO:0036388	pre-replicative complex assembly	0.000201157	0.58
biological_process	GO:0045084	positive regulation of interleukin-12 biosynthetic process	0.000201157	0.58
biological_process	GO:1902299	pre-replicative complex assembly involved in cell cycle DNA replication	0.000201157	0.58
biological_process	GO:0002699	positive regulation of immune effector process	0.000202812	0.58
biological_process	GO:0032897	negative regulation of viral transcription	0.000202982	0.58
biological_process	GO:0033365	protein localization to organelle	0.000203705	0.58
cellular_component	GO:0005751	mitochondrial respiratory chain complex IV	0.00182039	0.58
cellular_component	GO:0008540	proteasome regulatory particle, base subcomplex	0.00182039	0.58
cellular_component	GO:0042555	MCM complex	0.00182039	0.58
biological_process	GO:0007569	cell aging	0.000206282	0.59
biological_process	GO:2000736	regulation of stem cell differentiation	0.000206282	0.59
biological_process	GO:0061045	negative regulation of wound healing	0.000206741	0.59
biological_process	GO:0032872	regulation of stress-activated MAPK cascade	0.000207436	0.59
biological_process	GO:0042180	cellular ketone metabolic process	0.000208243	0.59
biological_process	GO:0051640	organelle localization	0.000208519	0.59
cellular_component	GO:0005764	lysosome	0.00189242	0.59
cellular_component	GO:0000323	lytic vacuole	0.00201064	0.59
biological_process	GO:0097150	neuronal stem cell population maintenance	0.000213592	0.6
biological_process	GO:0009219	pyrimidine deoxyribonucleotide metabolic process	0.000214115	0.6
biological_process	GO:0032495	response to muramyl dipeptide	0.000214115	0.6
biological_process	GO:0060071	Wnt signaling pathway, planar cell polarity pathway	0.000214332	0.6
biological_process	GO:1905897	regulation of response to endoplasmic reticulum stress	0.000216825	0.6
biological_process	GO:0008630	intrinsic apoptotic signaling pathway in response to DNA damage	0.000217325	0.6
biological_process	GO:0071384	cellular response to corticosteroid stimulus	0.000219167	0.6
biological_process	GO:0032088	negative regulation of NF-kappaB transcription factor activity	0.000219459	0.6
biological_process	GO:1990823	response to leukemia inhibitory factor	0.000220635	0.6
biological_process	GO:1990830	cellular response to leukemia inhibitory factor	0.000220635	0.6
biological_process	GO:0035710	CD4-positive, alpha-beta T cell activation	0.00022068	0.6
biological_process	GO:0051701	interaction with host	0.000223135	0.6
biological_process	GO:0009063	cellular amino acid catabolic process	0.000236278	0.6
biological_process	GO:0002793	positive regulation of peptide secretion	0.000240614	0.6
biological_process	GO:0032874	positive regulation of stress-activated MAPK cascade	0.000243766	0.6
biological_process	GO:0002720	positive regulation of cytokine production involved in immune response	0.000246919	0.6
biological_process	GO:1900047	negative regulation of hemostasis	0.000246919	0.6
biological_process	GO:0022904	respiratory electron transport chain	0.000250041	0.6
biological_process	GO:0015031	protein transport	0.000253101	0.6
biological_process	GO:1903707	negative regulation of hemopoiesis	0.000253222	0.6
cellular_component	GO:0030659	cytoplasmic vesicle membrane	0.00224223	0.6
biological_process	GO:0019692	deoxyribose phosphate metabolic process	0.000255929	0.61
biological_process	GO:0071706	tumor necrosis factor superfamily cytokine production	0.000256495	0.61
biological_process	GO:0006289	nucleotide-excision repair	0.000261739	0.61
biological_process	GO:0046683	response to organophosphorus	0.000264116	0.61
biological_process	GO:0051241	negative regulation of multicellular organismal process	0.000265524	0.61
biological_process	GO:0009743	response to carbohydrate	0.000267241	0.61
biological_process	GO:0009887	animal organ morphogenesis	0.000269365	0.63
biological_process	GO:0071385	cellular response to glucocorticoid stimulus	0.000269968	0.63
biological_process	GO:1903426	regulation of reactive oxygen species biosynthetic process	0.000270346	0.63
cellular_component	GO:0020003	symbiont-containing vacuole	0.00260312	0.64
biological_process	GO:0019319	hexose biosynthetic process	0.00027315	0.65
biological_process	GO:0002275	myeloid cell activation involved in immune response	0.000274488	0.65
biological_process	GO:1901655	cellular response to ketone	0.000274627	0.65
biological_process	GO:0007010	cytoskeleton organization	0.000278284	0.65
biological_process	GO:0032607	interferon-alpha production	0.000292048	0.65
biological_process	GO:0031396	regulation of protein ubiquitination	0.000294688	0.65
biological_process	GO:0097696	receptor signaling pathway via STAT	0.000299028	0.65
biological_process	GO:0071363	cellular response to growth factor stimulus	0.000299788	0.65
biological_process	GO:0051054	positive regulation of DNA metabolic process	0.000305149	0.65
biological_process	GO:0061061	muscle structure development	0.000307737	0.65
biological_process	GO:0042035	regulation of cytokine biosynthetic process	0.000310423	0.65
biological_process	GO:0032868	response to insulin	0.000313113	0.65
cellular_component	GO:0030141	secretory granule	0.0026843	0.65
biological_process	GO:0034121	regulation of toll-like receptor signaling pathway	0.000318902	0.66
biological_process	GO:0007052	mitotic spindle organization	0.00032536	0.66
biological_process	GO:0044774	mitotic DNA integrity checkpoint	0.00032536	0.66
biological_process	GO:0061041	regulation of wound healing	0.00032661	0.66
cellular_component	GO:0033176	proton-transporting V-type ATPase complex	0.00288203	0.66
cellular_component	GO:0005814	centriole	0.00288689	0.66
biological_process	GO:0046885	regulation of hormone biosynthetic process	0.000327177	0.68
biological_process	GO:0042119	neutrophil activation	0.000327776	0.68
biological_process	GO:0070372	regulation of ERK1 and ERK2 cascade	0.000330519	0.68
biological_process	GO:0045620	negative regulation of lymphocyte differentiation	0.000332295	0.68
biological_process	GO:1901342	regulation of vasculature development	0.000339632	0.68
biological_process	GO:0046209	nitric oxide metabolic process	0.000340103	0.68
biological_process	GO:0001843	neural tube closure	0.000341956	0.68
biological_process	GO:0045410	positive regulation of interleukin-6 biosynthetic process	0.000344754	0.7
biological_process	GO:0009790	embryo development	0.000346975	0.7
biological_process	GO:0000226	microtubule cytoskeleton organization	0.000349377	0.7
biological_process	GO:0048589	developmental growth	0.000355219	0.7
biological_process	GO:0001783	B cell apoptotic process	0.000357387	0.7
biological_process	GO:0022616	DNA strand elongation	0.000357387	0.7
biological_process	GO:0045824	negative regulation of innate immune response	0.00035802	0.7
biological_process	GO:0043933	protein-containing complex subunit organization	0.000359329	0.7
biological_process	GO:0036230	granulocyte activation	0.000362034	0.7
biological_process	GO:1901987	regulation of cell cycle phase transition	0.00036271	0.7
biological_process	GO:0060249	anatomical structure homeostasis	0.000363094	0.7
biological_process	GO:0002244	hematopoietic progenitor cell differentiation	0.000366723	0.7
biological_process	GO:0032269	negative regulation of cellular protein metabolic process	0.000369525	0.71
biological_process	GO:0002902	regulation of B cell apoptotic process	0.000376109	0.71
cellular_component	GO:0033179	proton-transporting V-type ATPase, V0 domain	0.00328357	0.71
cellular_component	GO:0035579	specific granule membrane	0.00328729	0.71
biological_process	GO:0007035	vacuolar acidification	0.000376604	0.72
biological_process	GO:0017000	antibiotic biosynthetic process	0.000376604	0.72
biological_process	GO:0035743	CD4-positive, alpha-beta T cell cytokine production	0.000376604	0.72
biological_process	GO:1902884	positive regulation of response to oxidative stress	0.000376604	0.72
biological_process	GO:0052547	regulation of peptidase activity	0.000385929	0.72
biological_process	GO:0043299	leukocyte degranulation	0.000394234	0.72
biological_process	GO:0002697	regulation of immune effector process	0.000400756	0.72
biological_process	GO:1902106	negative regulation of leukocyte differentiation	0.000404558	0.72
biological_process	GO:0044786	cell cycle DNA replication	0.000408999	0.72
biological_process	GO:0006790	sulfur compound metabolic process	0.00040969	0.72
biological_process	GO:0050870	positive regulation of T cell activation	0.000410458	0.72
biological_process	GO:0043648	dicarboxylic acid metabolic process	0.000412395	0.72
biological_process	GO:0072527	pyrimidine-containing compound metabolic process	0.000412395	0.72
biological_process	GO:0002832	negative regulation of response to biotic stimulus	0.000418763	0.72
biological_process	GO:0097711	ciliary basal body-plasma membrane docking	0.000418763	0.72
biological_process	GO:0046364	monosaccharide biosynthetic process	0.000423385	0.72
biological_process	GO:0060606	tube closure	0.000423385	0.72
biological_process	GO:0030193	regulation of blood coagulation	0.000423634	0.72
biological_process	GO:0048145	regulation of fibroblast proliferation	0.000426156	0.72
biological_process	GO:2000106	regulation of leukocyte apoptotic process	0.000426156	0.72
biological_process	GO:1903827	regulation of cellular protein localization	0.000426876	0.72
biological_process	GO:0000819	sister chromatid segregation	0.00042818	0.72
biological_process	GO:0070848	response to growth factor	0.000432921	0.72
biological_process	GO:0060541	respiratory system development	0.000435993	0.72
cellular_component	GO:0034708	methyltransferase complex	0.00330332	0.72
biological_process	GO:0018065	protein-cofactor linkage	0.00043941	0.75
biological_process	GO:0016485	protein processing	0.000443792	0.76
biological_process	GO:1900180	regulation of protein localization to nucleus	0.000450393	0.76
biological_process	GO:0048869	cellular developmental process	0.000472209	0.76
biological_process	GO:0044106	cellular amine metabolic process	0.000480156	0.76
biological_process	GO:0034504	protein localization to nucleus	0.000481141	0.76
biological_process	GO:0019318	hexose metabolic process	0.000495505	0.76
biological_process	GO:0002218	activation of innate immune response	0.000495759	0.76
biological_process	GO:0006469	negative regulation of protein kinase activity	0.000500377	0.76
biological_process	GO:1901215	negative regulation of neuron death	0.000502792	0.76
biological_process	GO:0060326	cell chemotaxis	0.00050867	0.76
molecular_function	GO:0046977	TAP binding	0.00131495	0.76
molecular_function	GO:0046978	TAP1 binding	0.00131495	0.76
molecular_function	GO:0046979	TAP2 binding	0.00131495	0.76
molecular_function	GO:0016773	phosphotransferase activity, alcohol group as acceptor	0.00137229	0.76
cellular_component	GO:0045335	phagocytic vesicle	0.00382023	0.76
cellular_component	GO:0070161	anchoring junction	0.00396099	0.76
biological_process	GO:0045577	regulation of B cell differentiation	0.000510569	0.77
biological_process	GO:0061615	glycolytic process through fructose-6-phosphate	0.000510569	0.77
biological_process	GO:0061620	glycolytic process through glucose-6-phosphate	0.000510569	0.77
biological_process	GO:1904994	regulation of leukocyte adhesion to vascular endothelial cell	0.000510569	0.77
biological_process	GO:0097327	response to antineoplastic agent	0.000513255	0.77
biological_process	GO:0035019	somatic stem cell population maintenance	0.000520684	0.77
biological_process	GO:0007088	regulation of mitotic nuclear division	0.000521903	0.77
biological_process	GO:0006261	DNA-dependent DNA replication	0.000525984	0.77
biological_process	GO:0002446	neutrophil mediated immunity	0.000529332	0.77
biological_process	GO:0048144	fibroblast proliferation	0.000530822	0.77
biological_process	GO:1900046	regulation of hemostasis	0.000531126	0.77
biological_process	GO:0045787	positive regulation of cell cycle	0.000534649	0.77
biological_process	GO:0002573	myeloid leukocyte differentiation	0.000535018	0.77
biological_process	GO:0006006	glucose metabolic process	0.000535018	0.77
biological_process	GO:1901605	alpha-amino acid metabolic process	0.000535018	0.77
biological_process	GO:0006163	purine nucleotide metabolic process	0.000541898	0.77
biological_process	GO:0070228	regulation of lymphocyte apoptotic process	0.000546354	0.77
biological_process	GO:0071236	cellular response to antibiotic	0.000553336	0.78
biological_process	GO:0060338	regulation of type I interferon-mediated signaling pathway	0.000558315	0.78
biological_process	GO:0031668	cellular response to extracellular stimulus	0.000564805	0.78
biological_process	GO:0060330	regulation of response to interferon-gamma	0.000575162	0.78
biological_process	GO:0060334	regulation of interferon-gamma-mediated signaling pathway	0.000575162	0.78
biological_process	GO:1901293	nucleoside phosphate biosynthetic process	0.000575739	0.78
biological_process	GO:0048008	platelet-derived growth factor receptor signaling pathway	0.000582884	0.78
biological_process	GO:0050819	negative regulation of coagulation	0.000582884	0.78
biological_process	GO:0060760	positive regulation of response to cytokine stimulus	0.000582884	0.78
biological_process	GO:0071398	cellular response to fatty acid	0.000582884	0.78
molecular_function	GO:0008270	zinc ion binding	0.0015657	0.78
molecular_function	GO:0001223	transcription coactivator binding	0.00164511	0.8
molecular_function	GO:0008017	microtubule binding	0.00167524	0.8
biological_process	GO:0042532	negative regulation of tyrosine phosphorylation of STAT protein	0.000594635	0.81
biological_process	GO:1900103	positive regulation of endoplasmic reticulum unfolded protein response	0.000594635	0.81
biological_process	GO:0001841	neural tube formation	0.000594744	0.81
biological_process	GO:0048646	anatomical structure formation involved in morphogenesis	0.000605002	0.81
biological_process	GO:0010389	regulation of G2/M transition of mitotic cell cycle	0.00060542	0.81
biological_process	GO:0006081	cellular aldehyde metabolic process	0.000611803	0.81
biological_process	GO:2001244	positive regulation of intrinsic apoptotic signaling pathway	0.000611803	0.81
biological_process	GO:0032102	negative regulation of response to external stimulus	0.000612724	0.81
biological_process	GO:0019725	cellular homeostasis	0.000630095	0.81
biological_process	GO:0032768	regulation of monooxygenase activity	0.000633582	0.81
biological_process	GO:0007589	body fluid secretion	0.000639012	0.81
biological_process	GO:0014065	phosphatidylinositol 3-kinase signaling	0.000646186	0.81
biological_process	GO:2001057	reactive nitrogen species metabolic process	0.000657398	0.81
biological_process	GO:0050688	regulation of defense response to virus	0.000658153	0.81
biological_process	GO:0045637	regulation of myeloid cell differentiation	0.000658664	0.81
molecular_function	GO:0048185	activin binding	0.00171689	0.81
molecular_function	GO:0003712	transcription coregulator activity	0.00174426	0.81
biological_process	GO:0046685	response to arsenic-containing substance	0.000660639	0.82
biological_process	GO:0060674	placenta blood vessel development	0.000660639	0.82
biological_process	GO:0032436	positive regulation of proteasomal ubiquitin-dependent protein catabolic process	0.000661805	0.82
biological_process	GO:0030952	establishment or maintenance of cytoskeleton polarity	0.000662142	0.82
biological_process	GO:0031958	corticosteroid receptor signaling pathway	0.000662142	0.82
biological_process	GO:0061684	chaperone-mediated autophagy	0.000662142	0.82
cellular_component	GO:0005638	lamin filament	0.00414792	0.82
cellular_component	GO:0032133	chromosome passenger complex	0.00414792	0.82
biological_process	GO:0006809	nitric oxide biosynthetic process	0.000662265	0.83
biological_process	GO:1902042	negative regulation of extrinsic apoptotic signaling pathway via death domain receptors	0.000662376	0.83
molecular_function	GO:0003714	transcription corepressor activity	0.00183503	0.83
molecular_function	GO:0046914	transition metal ion binding	0.00194551	0.84
cellular_component	GO:0000139	Golgi membrane	0.00428931	0.84
cellular_component	GO:0036064	ciliary basal body	0.00436675	0.84
biological_process	GO:0001655	urogenital system development	0.000667425	0.85
biological_process	GO:0010821	regulation of mitochondrion organization	0.000674219	0.85
biological_process	GO:0001961	positive regulation of cytokine-mediated signaling pathway	0.000674357	0.85
biological_process	GO:0032608	interferon-beta production	0.000674357	0.85
biological_process	GO:0000902	cell morphogenesis	0.000679486	0.85
cellular_component	GO:0005875	microtubule associated complex	0.00472794	0.85
cellular_component	GO:0030670	phagocytic vesicle membrane	0.00487144	0.85
molecular_function	GO:0043548	phosphatidylinositol 3-kinase binding	0.00195664	0.86
molecular_function	GO:0140097	catalytic activity, acting on DNA	0.00214395	0.86
molecular_function	GO:0016616	oxidoreductase activity, acting on the CH-OH group of donors, NAD or NADP as acceptor	0.00214937	0.86
biological_process	GO:0007042	lysosomal lumen acidification	0.000681081	0.87
biological_process	GO:0001701	in utero embryonic development	0.000702579	0.87
biological_process	GO:0072521	purine-containing compound metabolic process	0.000709678	0.87
biological_process	GO:0042133	neurotransmitter metabolic process	0.000713125	0.88
biological_process	GO:0031647	regulation of protein stability	0.000713987	0.88
biological_process	GO:0042737	drug catabolic process	0.000715668	0.88
biological_process	GO:1904029	regulation of cyclin-dependent protein kinase activity	0.00071652	0.88
biological_process	GO:0048017	inositol lipid-mediated signaling	0.00072747	0.88
biological_process	GO:0050852	T cell receptor signaling pathway	0.000737638	0.88
biological_process	GO:0000723	telomere maintenance	0.000739193	0.88
biological_process	GO:2000058	regulation of ubiquitin-dependent protein catabolic process	0.000752595	0.88
biological_process	GO:0006885	regulation of pH	0.000760061	0.89
biological_process	GO:0000083	regulation of transcription involved in G1/S transition of mitotic cell cycle	0.000773851	0.89
biological_process	GO:0008299	isoprenoid biosynthetic process	0.000773851	0.89
biological_process	GO:0015949	nucleobase-containing small molecule interconversion	0.000773851	0.89
biological_process	GO:0033014	tetrapyrrole biosynthetic process	0.000773851	0.89
biological_process	GO:0032869	cellular response to insulin stimulus	0.000781671	0.89
biological_process	GO:0008285	negative regulation of cell population proliferation	0.000782534	0.89
biological_process	GO:0051345	positive regulation of hydrolase activity	0.000783313	0.89
biological_process	GO:0034284	response to monosaccharide	0.000785553	0.89
biological_process	GO:0032922	circadian regulation of gene expression	0.000788993	0.89
biological_process	GO:0030154	cell differentiation	0.000792825	0.89
biological_process	GO:0006119	oxidative phosphorylation	0.00079367	0.89
biological_process	GO:1903035	negative regulation of response to wounding	0.000795891	0.89
biological_process	GO:0043312	neutrophil degranulation	0.000811831	0.89
biological_process	GO:0016055	Wnt signaling pathway	0.000812622	0.89
biological_process	GO:0051052	regulation of DNA metabolic process	0.000821252	0.89
biological_process	GO:1905114	cell surface receptor signaling pathway involved in cell-cell signaling	0.000822344	0.89
biological_process	GO:0043367	CD4-positive, alpha-beta T cell differentiation	0.000826204	0.89
biological_process	GO:0010595	positive regulation of endothelial cell migration	0.000827941	0.89
biological_process	GO:0061614	pri-miRNA transcription by RNA polymerase II	0.000831703	0.89
biological_process	GO:1900744	regulation of p38MAPK cascade	0.000831703	0.89
biological_process	GO:1903531	negative regulation of secretion by cell	0.000833992	0.89
biological_process	GO:0032640	tumor necrosis factor production	0.000853043	0.89
biological_process	GO:1903555	regulation of tumor necrosis factor superfamily cytokine production	0.000853043	0.89
biological_process	GO:0051341	regulation of oxidoreductase activity	0.000859675	0.89
biological_process	GO:0014066	regulation of phosphatidylinositol 3-kinase signaling	0.000867093	0.89
biological_process	GO:0048015	phosphatidylinositol-mediated signaling	0.00088437	0.89
biological_process	GO:0007623	circadian rhythm	0.000889728	0.89
molecular_function	GO:0000774	adenyl-nucleotide exchange factor activity	0.00235044	0.89
molecular_function	GO:0043621	protein self-association	0.00248021	0.89
molecular_function	GO:0003688	DNA replication origin binding	0.00251877	0.89
molecular_function	GO:0048156	tau protein binding	0.00258721	0.89
molecular_function	GO:0015631	tubulin binding	0.00265835	0.89
molecular_function	GO:0042056	chemoattractant activity	0.00276762	0.89
biological_process	GO:0048146	positive regulation of fibroblast proliferation	0.000895373	0.9
biological_process	GO:0002369	T cell cytokine production	0.000921204	0.9
biological_process	GO:0051281	positive regulation of release of sequestered calcium ion into cytosol	0.000921204	0.9
biological_process	GO:0090184	positive regulation of kidney development	0.000921204	0.9
biological_process	GO:0009108	coenzyme biosynthetic process	0.000923358	0.9
biological_process	GO:0042770	signal transduction in response to DNA damage	0.000926154	0.9
biological_process	GO:2000060	positive regulation of ubiquitin-dependent protein catabolic process	0.000945529	0.9
biological_process	GO:0198738	cell-cell signaling by wnt	0.00094567	0.9
biological_process	GO:0002220	innate immune response activating cell surface receptor signaling pathway	0.00094698	0.9
molecular_function	GO:0019208	phosphatase regulator activity	0.00282094	0.9
molecular_function	GO:0046332	SMAD binding	0.00287517	0.9
biological_process	GO:0009249	protein lipoylation	0.000963472	0.92
biological_process	GO:0045341	MHC class I biosynthetic process	0.000963472	0.92
biological_process	GO:0045343	regulation of MHC class I biosynthetic process	0.000963472	0.92
biological_process	GO:0048549	positive regulation of pinocytosis	0.000963472	0.92
biological_process	GO:0072126	positive regulation of glomerular mesangial cell proliferation	0.000963472	0.92
biological_process	GO:0071482	cellular response to light stimulus	0.00097317	0.92
biological_process	GO:0023061	signal release	0.000993681	0.92
biological_process	GO:0001659	temperature homeostasis	0.000999455	0.92
biological_process	GO:0042982	amyloid precursor protein metabolic process	0.00100885	0.92
biological_process	GO:0006970	response to osmotic stress	0.00100949	0.92
biological_process	GO:0060218	hematopoietic stem cell differentiation	0.00100949	0.92
biological_process	GO:0061138	morphogenesis of a branching epithelium	0.00100975	0.92
molecular_function	GO:0001228	DNA-binding transcription activator activity, RNA polymerase II-specific	0.00305808	0.92
molecular_function	GO:1990404	protein ADP-ribosylase activity	0.00306735	0.92
molecular_function	GO:0008094	DNA-dependent ATPase activity	0.00309363	0.92
molecular_function	GO:0001216	DNA-binding transcription activator activity	0.00329843	0.92
cellular_component	GO:0000799	nuclear condensin complex	0.00548003	0.92
biological_process	GO:0006297	nucleotide-excision repair, DNA gap filling	0.00101376	0.93
cellular_component	GO:0000781	chromosome, telomeric region	0.00555748	0.93
cellular_component	GO:0019005	SCF ubiquitin ligase complex	0.00562505	0.93
cellular_component	GO:0000776	kinetochore	0.00566027	0.93
cellular_component	GO:0031968	organelle outer membrane	0.00589366	0.94
biological_process	GO:0048548	regulation of pinocytosis	0.00102002	0.95
biological_process	GO:0070213	protein auto-ADP-ribosylation	0.00102002	0.95
biological_process	GO:2000134	negative regulation of G1/S transition of mitotic cell cycle	0.00102142	0.95
biological_process	GO:0071260	cellular response to mechanical stimulus	0.00102267	0.95
biological_process	GO:2000573	positive regulation of DNA biosynthetic process	0.00102456	0.95
molecular_function	GO:0070324	thyroid hormone binding	0.00372462	0.95
biological_process	GO:0006195	purine nucleotide catabolic process	0.00102474	0.96
biological_process	GO:0042987	amyloid precursor protein catabolic process	0.00102474	0.96
biological_process	GO:0061756	leukocyte adhesion to vascular endothelial cell	0.00102474	0.96
biological_process	GO:0002283	neutrophil activation involved in immune response	0.00102654	0.96
biological_process	GO:2000278	regulation of DNA biosynthetic process	0.00102728	0.96
biological_process	GO:0046631	alpha-beta T cell activation	0.00102783	0.96
biological_process	GO:0042445	hormone metabolic process	0.00103105	0.96
cellular_component	GO:0031298	replication fork protection complex	0.00593286	0.96
biological_process	GO:0045914	negative regulation of catecholamine metabolic process	0.00104997	0.97
biological_process	GO:0045963	negative regulation of dopamine metabolic process	0.00104997	0.97
biological_process	GO:0071887	leukocyte apoptotic process	0.00106675	0.97
biological_process	GO:0001763	morphogenesis of a branching structure	0.00107959	0.97
biological_process	GO:1901361	organic cyclic compound catabolic process	0.00108588	0.97
biological_process	GO:0032648	regulation of interferon-beta production	0.00110932	0.97
biological_process	GO:0009264	deoxyribonucleotide catabolic process	0.00111818	0.97
biological_process	GO:0051767	nitric-oxide synthase biosynthetic process	0.00111818	0.97
biological_process	GO:0051769	regulation of nitric-oxide synthase biosynthetic process	0.00111818	0.97
biological_process	GO:0002758	innate immune response-activating signal transduction	0.00112093	0.97
biological_process	GO:0002761	regulation of myeloid leukocyte differentiation	0.00112093	0.97
biological_process	GO:0006631	fatty acid metabolic process	0.00112311	0.97
biological_process	GO:0000280	nuclear division	0.0011266	0.97
biological_process	GO:0009612	response to mechanical stimulus	0.00113552	0.97
biological_process	GO:2001252	positive regulation of chromosome organization	0.00114321	0.97
biological_process	GO:0010720	positive regulation of cell development	0.0011489	0.97
biological_process	GO:0090068	positive regulation of cell cycle process	0.00115422	0.97
biological_process	GO:1901722	regulation of cell proliferation involved in kidney development	0.00116857	0.97
biological_process	GO:0002223	stimulatory C-type lectin receptor signaling pathway	0.00117171	0.97
biological_process	GO:2000772	regulation of cellular senescence	0.00117561	0.97
biological_process	GO:0030595	leukocyte chemotaxis	0.00117838	0.97
molecular_function	GO:0005102	signaling receptor binding	0.00427634	0.97
molecular_function	GO:0035035	histone acetyltransferase binding	0.00458217	0.97
cellular_component	GO:0005652	nuclear lamina	0.00615025	0.97
cellular_component	GO:0005635	nuclear envelope	0.00644486	0.97
cellular_component	GO:0019867	outer membrane	0.00720176	0.97
cellular_component	GO:0033643	host cell part	0.00756979	0.97
biological_process	GO:0071850	mitotic cell cycle arrest	0.00118282	0.98
biological_process	GO:2001267	regulation of cysteine-type endopeptidase activity involved in apoptotic signaling pathway	0.00118282	0.98
biological_process	GO:0033135	regulation of peptidyl-serine phosphorylation	0.00119638	0.98
biological_process	GO:1903034	regulation of response to wounding	0.00122543	0.98
biological_process	GO:0050818	regulation of coagulation	0.00123623	0.98
biological_process	GO:0002294	CD4-positive, alpha-beta T cell differentiation involved in immune response	0.00125897	0.98
biological_process	GO:0032434	regulation of proteasomal ubiquitin-dependent protein catabolic process	0.00126001	0.98
biological_process	GO:0010817	regulation of hormone levels	0.00127195	0.98
biological_process	GO:0046782	regulation of viral transcription	0.00127943	0.98
biological_process	GO:0009123	nucleoside monophosphate metabolic process	0.0012866	0.98
biological_process	GO:0038034	signal transduction in absence of ligand	0.0012866	0.98
biological_process	GO:0097192	extrinsic apoptotic signaling pathway in absence of ligand	0.0012866	0.98
biological_process	GO:1902036	regulation of hematopoietic stem cell differentiation	0.0012866	0.98
biological_process	GO:0002292	T cell differentiation involved in immune response	0.00128808	0.98
biological_process	GO:0009746	response to hexose	0.00129489	0.98
biological_process	GO:0001667	ameboidal-type cell migration	0.00131022	0.98
biological_process	GO:0033044	regulation of chromosome organization	0.00133092	0.98
biological_process	GO:0006735	NADH regeneration	0.00134777	0.98
biological_process	GO:0061621	canonical glycolysis	0.00134777	0.98
biological_process	GO:0061718	glucose catabolic process to pyruvate	0.00134777	0.98
biological_process	GO:0050729	positive regulation of inflammatory response	0.00134932	0.98
biological_process	GO:0048511	rhythmic process	0.00136465	0.98
biological_process	GO:0014020	primary neural tube formation	0.00137305	0.98
biological_process	GO:0051591	response to cAMP	0.00137305	0.98
biological_process	GO:1902882	regulation of response to oxidative stress	0.00137305	0.98
biological_process	GO:0042771	intrinsic apoptotic signaling pathway in response to DNA damage by p53 class mediator	0.00137383	0.98
biological_process	GO:0010565	regulation of cellular ketone metabolic process	0.00139466	0.98
biological_process	GO:0043620	regulation of DNA-templated transcription in response to stress	0.00140371	0.98
biological_process	GO:0046634	regulation of alpha-beta T cell activation	0.00142027	0.98
biological_process	GO:0014074	response to purine-containing compound	0.00143109	0.98
biological_process	GO:0016311	dephosphorylation	0.00145935	0.98
biological_process	GO:0051051	negative regulation of transport	0.00146002	0.98
biological_process	GO:0019882	antigen processing and presentation	0.00148066	0.98
biological_process	GO:1901532	regulation of hematopoietic progenitor cell differentiation	0.00150569	0.98
biological_process	GO:0065003	protein-containing complex assembly	0.00154691	0.98
biological_process	GO:0006084	acetyl-CoA metabolic process	0.001549	0.98
biological_process	GO:0003158	endothelium development	0.00155133	0.98
biological_process	GO:0042476	odontogenesis	0.00155133	0.98
biological_process	GO:0046434	organophosphate catabolic process	0.00155133	0.98
biological_process	GO:0050769	positive regulation of neurogenesis	0.00155907	0.98
biological_process	GO:0001525	angiogenesis	0.0015662	0.98
molecular_function	GO:0004386	helicase activity	0.00479255	0.98
molecular_function	GO:0046983	protein dimerization activity	0.00501207	0.98
molecular_function	GO:0003725	double-stranded RNA binding	0.00509617	0.98
molecular_function	GO:0004709	MAP kinase kinase kinase activity	0.0053689	0.98
cellular_component	GO:0005657	replication fork	0.00774347	0.98
cellular_component	GO:0043596	nuclear replication fork	0.0082413	0.98
cellular_component	GO:0005667	transcription factor complex	0.00832723	0.98
cellular_component	GO:0017053	transcriptional repressor complex	0.00893677	0.98
cellular_component	GO:0030666	endocytic vesicle membrane	0.00897625	0.98
cellular_component	GO:0000780	condensed nuclear chromosome, centromeric region	0.00978639	0.98
biological_process	GO:0019320	hexose catabolic process	0.00157202	0.99
biological_process	GO:0042743	hydrogen peroxide metabolic process	0.00157202	0.99
biological_process	GO:0043525	positive regulation of neuron apoptotic process	0.00157202	0.99
biological_process	GO:0000079	regulation of cyclin-dependent protein serine/threonine kinase activity	0.00157933	0.99
biological_process	GO:0030324	lung development	0.00158364	0.99
biological_process	GO:0006801	superoxide metabolic process	0.00159442	0.99
biological_process	GO:0002287	alpha-beta T cell activation involved in immune response	0.00159873	0.99
biological_process	GO:0002293	alpha-beta T cell differentiation involved in immune response	0.00159873	0.99
biological_process	GO:0050701	interleukin-1 secretion	0.00159873	0.99
biological_process	GO:0050709	negative regulation of protein secretion	0.00160742	0.99
biological_process	GO:0070227	lymphocyte apoptotic process	0.00160771	0.99
biological_process	GO:0009165	nucleotide biosynthetic process	0.00162723	0.99
biological_process	GO:0006626	protein targeting to mitochondrion	0.00164348	0.99
biological_process	GO:2001243	negative regulation of intrinsic apoptotic signaling pathway	0.00164348	0.99
biological_process	GO:1902895	positive regulation of pri-miRNA transcription by RNA polymerase II	0.00164602	0.99
biological_process	GO:0050777	negative regulation of immune response	0.00164765	0.99
biological_process	GO:0051302	regulation of cell division	0.00168705	0.99
biological_process	GO:0071559	response to transforming growth factor beta	0.00169006	0.99
biological_process	GO:0045765	regulation of angiogenesis	0.00169193	0.99
biological_process	GO:0045621	positive regulation of lymphocyte differentiation	0.00170629	0.99
biological_process	GO:0030334	regulation of cell migration	0.00172682	0.99
biological_process	GO:0032944	regulation of mononuclear cell proliferation	0.00172908	0.99
biological_process	GO:0000022	mitotic spindle elongation	0.00173073	0.99
biological_process	GO:0010911	regulation of isomerase activity	0.00173073	0.99
biological_process	GO:0010912	positive regulation of isomerase activity	0.00173073	0.99
biological_process	GO:0060677	ureteric bud elongation	0.00173073	0.99
biological_process	GO:0060700	regulation of ribonuclease activity	0.00173073	0.99
biological_process	GO:0071225	cellular response to muramyl dipeptide	0.00173073	0.99
biological_process	GO:0030641	regulation of cellular pH	0.00176689	0.99
biological_process	GO:0031058	positive regulation of histone modification	0.00176689	0.99
biological_process	GO:0046386	deoxyribose phosphate catabolic process	0.00179234	0.99
biological_process	GO:0072111	cell proliferation involved in kidney development	0.00179234	0.99
biological_process	GO:0000082	G1/S transition of mitotic cell cycle	0.00179694	0.99
biological_process	GO:2000145	regulation of cell motility	0.00181045	0.99
biological_process	GO:0007254	JNK cascade	0.00181305	0.99
biological_process	GO:0050706	regulation of interleukin-1 beta secretion	0.00181824	0.99
biological_process	GO:0044843	cell cycle G1/S phase transition	0.00182383	0.99
biological_process	GO:0007260	tyrosine phosphorylation of STAT protein	0.00182423	0.99
biological_process	GO:0050730	regulation of peptidyl-tyrosine phosphorylation	0.00187437	0.99
biological_process	GO:1905269	positive regulation of chromatin organization	0.00187623	0.99
biological_process	GO:0050878	regulation of body fluid levels	0.00188168	0.99
biological_process	GO:0002701	negative regulation of production of molecular mediator of immune response	0.00189862	0.99
biological_process	GO:0032735	positive regulation of interleukin-12 production	0.00189862	0.99
biological_process	GO:0014009	glial cell proliferation	0.00190501	0.99
biological_process	GO:0042398	cellular modified amino acid biosynthetic process	0.00190501	0.99
biological_process	GO:0032680	regulation of tumor necrosis factor production	0.00191332	0.99
biological_process	GO:0040012	regulation of locomotion	0.0019181	0.99
biological_process	GO:0051100	negative regulation of binding	0.00192079	0.99
biological_process	GO:0090398	cellular senescence	0.00192394	0.99
biological_process	GO:0016054	organic acid catabolic process	0.00192513	0.99
biological_process	GO:0046395	carboxylic acid catabolic process	0.00192513	0.99
biological_process	GO:0035690	cellular response to drug	0.00193259	0.99
biological_process	GO:0070373	negative regulation of ERK1 and ERK2 cascade	0.00196316	0.99
biological_process	GO:0032655	regulation of interleukin-12 production	0.00196413	0.99
biological_process	GO:0008584	male gonad development	0.00196783	0.99
biological_process	GO:0032647	regulation of interferon-alpha production	0.00197567	0.99
biological_process	GO:0042730	fibrinolysis	0.00197567	0.99
biological_process	GO:0090344	negative regulation of cell aging	0.00197567	0.99
biological_process	GO:0009200	deoxyribonucleoside triphosphate metabolic process	0.00198953	0.99
biological_process	GO:0070230	positive regulation of lymphocyte apoptotic process	0.00198953	0.99
biological_process	GO:1905276	regulation of epithelial tube formation	0.00198953	0.99
biological_process	GO:0070988	demethylation	0.00199273	0.99
biological_process	GO:0019229	regulation of vasoconstriction	0.00199914	0.99
biological_process	GO:0035904	aorta development	0.00199914	0.99
biological_process	GO:0042093	T-helper cell differentiation	0.00199914	0.99
biological_process	GO:0006220	pyrimidine nucleotide metabolic process	0.00201348	0.99
biological_process	GO:0003279	cardiac septum development	0.00201561	0.99
biological_process	GO:0019693	ribose phosphate metabolic process	0.00204319	0.99
molecular_function	GO:0004448	isocitrate dehydrogenase activity	0.00557374	0.99
molecular_function	GO:0004904	interferon receptor activity	0.00557374	0.99
molecular_function	GO:0008379	thioredoxin peroxidase activity	0.00557374	0.99
molecular_function	GO:0033220	ATPase-coupled amide-transporter activity	0.00557374	0.99
molecular_function	GO:0043426	MRF binding	0.00557374	0.99
molecular_function	GO:0004721	phosphoprotein phosphatase activity	0.00570341	0.99
molecular_function	GO:0050661	NADP binding	0.0058264	0.99
cellular_component	GO:0030496	midbody	0.0102209	0.99
cellular_component	GO:0031301	integral component of organelle membrane	0.0103231	0.99
cellular_component	GO:0070069	cytochrome complex	0.010517	0.99
biological_process	GO:0002371	dendritic cell cytokine production	0.00206769	1
biological_process	GO:0002903	negative regulation of B cell apoptotic process	0.00206769	1
biological_process	GO:0030950	establishment or maintenance of actin cytoskeleton polarity	0.00206769	1
biological_process	GO:1902337	regulation of apoptotic process involved in morphogenesis	0.00206769	1
biological_process	GO:0048863	stem cell differentiation	0.00207611	1
biological_process	GO:0048878	chemical homeostasis	0.00207678	1
biological_process	GO:0010761	fibroblast migration	0.00210313	1
biological_process	GO:0033574	response to testosterone	0.00210313	1
biological_process	GO:0033683	nucleotide-excision repair, DNA incision	0.00210313	1
biological_process	GO:0042769	DNA damage response, detection of DNA damage	0.00210313	1
biological_process	GO:0050856	regulation of T cell receptor signaling pathway	0.00210313	1
biological_process	GO:0072529	pyrimidine-containing compound catabolic process	0.00210313	1
biological_process	GO:0007039	protein catabolic process in the vacuole	0.00211007	1
biological_process	GO:0034134	toll-like receptor 2 signaling pathway	0.00211007	1
biological_process	GO:0042921	glucocorticoid receptor signaling pathway	0.00211007	1
biological_process	GO:0050651	dermatan sulfate proteoglycan biosynthetic process	0.00211007	1
biological_process	GO:0051770	positive regulation of nitric-oxide synthase biosynthetic process	0.00211007	1
biological_process	GO:1902969	mitotic DNA replication	0.00211007	1
biological_process	GO:1904874	positive regulation of telomerase RNA localization to Cajal body	0.00211007	1
biological_process	GO:0030004	cellular monovalent inorganic cation homeostasis	0.00211683	1
biological_process	GO:0051270	regulation of cellular component movement	0.00211893	1
biological_process	GO:0043618	regulation of transcription from RNA polymerase II promoter in response to stress	0.00212592	1
biological_process	GO:0030879	mammary gland development	0.0021364	1
biological_process	GO:0051783	regulation of nuclear division	0.00214656	1
biological_process	GO:0001678	cellular glucose homeostasis	0.00216781	1
biological_process	GO:0001890	placenta development	0.00216781	1
biological_process	GO:0010038	response to metal ion	0.00218445	1
biological_process	GO:0060612	adipose tissue development	0.00226137	1
biological_process	GO:0071364	cellular response to epidermal growth factor stimulus	0.00226137	1
biological_process	GO:0046546	development of primary male sexual characteristics	0.00226869	1
biological_process	GO:0045582	positive regulation of T cell differentiation	0.0022728	1
biological_process	GO:0043409	negative regulation of MAPK cascade	0.00229404	1
biological_process	GO:0051896	regulation of protein kinase B signaling	0.00230436	1
biological_process	GO:0002478	antigen processing and presentation of exogenous peptide antigen	0.00231703	1
biological_process	GO:0048667	cell morphogenesis involved in neuron differentiation	0.00231814	1
biological_process	GO:0038128	ERBB2 signaling pathway	0.00232023	1
biological_process	GO:0051385	response to mineralocorticoid	0.00232023	1
biological_process	GO:0071353	cellular response to interleukin-4	0.00232023	1
biological_process	GO:0060840	artery development	0.00232445	1
biological_process	GO:0002064	epithelial cell development	0.00232507	1
biological_process	GO:0019439	aromatic compound catabolic process	0.00233308	1
biological_process	GO:0019430	removal of superoxide radicals	0.00235014	1
biological_process	GO:0032609	interferon-gamma production	0.00236372	1
biological_process	GO:0043370	regulation of CD4-positive, alpha-beta T cell differentiation	0.00237728	1
biological_process	GO:0045646	regulation of erythrocyte differentiation	0.00237728	1
biological_process	GO:2001239	regulation of extrinsic apoptotic signaling pathway in absence of ligand	0.00237728	1
biological_process	GO:0045926	negative regulation of growth	0.00238317	1
biological_process	GO:0071560	cellular response to transforming growth factor beta stimulus	0.00238317	1
biological_process	GO:0003281	ventricular septum development	0.00240215	1
biological_process	GO:0048666	neuron development	0.00241293	1
biological_process	GO:0032755	positive regulation of interleukin-6 production	0.0024295	1
biological_process	GO:0071322	cellular response to carbohydrate stimulus	0.00245328	1
biological_process	GO:0000731	DNA synthesis involved in DNA repair	0.00245572	1
biological_process	GO:0050999	regulation of nitric-oxide synthase activity	0.00245572	1
biological_process	GO:0072523	purine-containing compound catabolic process	0.00245572	1
biological_process	GO:0050663	cytokine secretion	0.00246884	1
biological_process	GO:0046888	negative regulation of hormone secretion	0.0025158	1
biological_process	GO:0001836	release of cytochrome c from mitochondria	0.00252029	1
biological_process	GO:1902807	negative regulation of cell cycle G1/S phase transition	0.00255475	1
biological_process	GO:0050670	regulation of lymphocyte proliferation	0.00260078	1
biological_process	GO:0006637	acyl-CoA metabolic process	0.00261642	1
biological_process	GO:0033138	positive regulation of peptidyl-serine phosphorylation	0.00261642	1
biological_process	GO:0035383	thioester metabolic process	0.00261642	1
biological_process	GO:0030323	respiratory tube development	0.00261971	1
biological_process	GO:0051897	positive regulation of protein kinase B signaling	0.00261971	1
biological_process	GO:0070663	regulation of leukocyte proliferation	0.00263425	1
biological_process	GO:1900407	regulation of cellular response to oxidative stress	0.00263729	1
biological_process	GO:0010467	gene expression	0.00265501	1
biological_process	GO:0032990	cell part morphogenesis	0.0026554	1
biological_process	GO:1902749	regulation of cell cycle G2/M phase transition	0.00271194	1
biological_process	GO:0044782	cilium organization	0.00272454	1
biological_process	GO:0051453	regulation of intracellular pH	0.00273746	1
biological_process	GO:0032611	interleukin-1 beta production	0.0027472	1
biological_process	GO:0032727	positive regulation of interferon-alpha production	0.00276006	1
biological_process	GO:2000773	negative regulation of cellular senescence	0.00276006	1
biological_process	GO:0009150	purine ribonucleotide metabolic process	0.00282209	1
biological_process	GO:0000303	response to superoxide	0.00282401	1
biological_process	GO:0009211	pyrimidine deoxyribonucleoside triphosphate metabolic process	0.00286926	1
biological_process	GO:0031077	post-embryonic camera-type eye development	0.00286926	1
biological_process	GO:0033239	negative regulation of cellular amine metabolic process	0.00286926	1
biological_process	GO:0035234	ectopic germ cell programmed cell death	0.00286926	1
biological_process	GO:0045003	double-strand break repair via synthesis-dependent strand annealing	0.00286926	1
biological_process	GO:0051256	mitotic spindle midzone assembly	0.00286926	1
biological_process	GO:0044773	mitotic DNA damage checkpoint	0.00288004	1
biological_process	GO:0009259	ribonucleotide metabolic process	0.0029109	1
biological_process	GO:0033559	unsaturated fatty acid metabolic process	0.00291449	1
biological_process	GO:0043086	negative regulation of catalytic activity	0.00295975	1
biological_process	GO:0030225	macrophage differentiation	0.00296802	1
biological_process	GO:0045601	regulation of endothelial cell differentiation	0.00296802	1
biological_process	GO:0035567	non-canonical Wnt signaling pathway	0.00301165	1
biological_process	GO:0036473	cell death in response to oxidative stress	0.00301399	1
biological_process	GO:0019915	lipid storage	0.00306826	1
biological_process	GO:0033627	cell adhesion mediated by integrin	0.00306826	1
biological_process	GO:0048285	organelle fission	0.00308545	1
biological_process	GO:1901607	alpha-amino acid biosynthetic process	0.0031196	1
biological_process	GO:0010332	response to gamma radiation	0.00315743	1
biological_process	GO:0032615	interleukin-12 production	0.00315743	1
biological_process	GO:0010631	epithelial cell migration	0.00316286	1
biological_process	GO:0003159	morphogenesis of an endothelium	0.00318057	1
biological_process	GO:0060716	labyrinthine layer blood vessel development	0.00318057	1
biological_process	GO:0061154	endothelial tube morphogenesis	0.00318057	1
biological_process	GO:0090670	RNA localization to Cajal body	0.00318057	1
biological_process	GO:0090671	telomerase RNA localization to Cajal body	0.00318057	1
biological_process	GO:0090672	telomerase RNA localization	0.00318057	1
biological_process	GO:0090685	RNA localization to nucleus	0.00318057	1
biological_process	GO:0030178	negative regulation of Wnt signaling pathway	0.00323842	1
biological_process	GO:0050707	regulation of cytokine secretion	0.00323842	1
biological_process	GO:0031175	neuron projection development	0.00327618	1
biological_process	GO:0022406	membrane docking	0.00332899	1
biological_process	GO:0140056	organelle localization by membrane tethering	0.00337921	1
biological_process	GO:0031145	anaphase-promoting complex-dependent catabolic process	0.00340935	1
biological_process	GO:0033238	regulation of cellular amine metabolic process	0.00340935	1
biological_process	GO:0110110	positive regulation of animal organ morphogenesis	0.00340935	1
biological_process	GO:0002230	positive regulation of defense response to virus by host	0.00341785	1
biological_process	GO:0006779	porphyrin-containing compound biosynthetic process	0.00341785	1
biological_process	GO:0031954	positive regulation of protein autophosphorylation	0.00341785	1
biological_process	GO:0006296	nucleotide-excision repair, DNA incision, 5'-to lesion	0.00349669	1
biological_process	GO:0050691	regulation of defense response to virus by host	0.00349669	1
biological_process	GO:0052372	modulation by symbiont of entry into host	0.00349669	1
biological_process	GO:0016540	protein autoprocessing	0.003558	1
biological_process	GO:0035970	peptidyl-threonine dephosphorylation	0.003558	1
biological_process	GO:0050655	dermatan sulfate proteoglycan metabolic process	0.003558	1
biological_process	GO:0051235	maintenance of location	0.00358612	1
biological_process	GO:0120031	plasma membrane bounded cell projection assembly	0.00359313	1
biological_process	GO:1903038	negative regulation of leukocyte cell-cell adhesion	0.00360137	1
biological_process	GO:0006283	transcription-coupled nucleotide-excision repair	0.00364817	1
biological_process	GO:0003149	membranous septum morphogenesis	0.00366771	1
biological_process	GO:0010944	negative regulation of transcription by competitive promoter binding	0.00366771	1
biological_process	GO:0051231	spindle elongation	0.00366771	1
biological_process	GO:0051255	spindle midzone assembly	0.00366771	1
biological_process	GO:0072124	regulation of glomerular mesangial cell proliferation	0.00366771	1
biological_process	GO:1901033	positive regulation of response to reactive oxygen species	0.00366771	1
biological_process	GO:1902237	positive regulation of endoplasmic reticulum stress-induced intrinsic apoptotic signaling pathway	0.00366771	1
biological_process	GO:1903265	positive regulation of tumor necrosis factor-mediated signaling pathway	0.00366771	1
biological_process	GO:2000109	regulation of macrophage apoptotic process	0.00366771	1
biological_process	GO:0019985	translesion synthesis	0.0037073	1
biological_process	GO:1902893	regulation of pri-miRNA transcription by RNA polymerase II	0.0037073	1
biological_process	GO:0000075	cell cycle checkpoint	0.00373839	1
biological_process	GO:0009162	deoxyribonucleoside monophosphate metabolic process	0.00378625	1
biological_process	GO:0009223	pyrimidine deoxyribonucleotide catabolic process	0.00378625	1
biological_process	GO:0031115	negative regulation of microtubule polymerization	0.00378625	1
biological_process	GO:0070431	nucleotide-binding oligomerization domain containing 2 signaling pathway	0.00378625	1
biological_process	GO:0018958	phenol-containing compound metabolic process	0.00379173	1
biological_process	GO:0048858	cell projection morphogenesis	0.00379882	1
biological_process	GO:0007051	spindle organization	0.0038101	1
biological_process	GO:0050854	regulation of antigen receptor-mediated signaling pathway	0.00384016	1
biological_process	GO:0045581	negative regulation of T cell differentiation	0.00384757	1
biological_process	GO:0032355	response to estradiol	0.00388272	1
biological_process	GO:0009410	response to xenobiotic stimulus	0.00389248	1
biological_process	GO:0000187	activation of MAPK activity	0.0038947	1
biological_process	GO:0106106	cold-induced thermogenesis	0.00390309	1
biological_process	GO:0120161	regulation of cold-induced thermogenesis	0.00390309	1
biological_process	GO:2000514	regulation of CD4-positive, alpha-beta T cell activation	0.00390813	1
biological_process	GO:0042446	hormone biosynthetic process	0.00391124	1
biological_process	GO:0043124	negative regulation of I-kappaB kinase/NF-kappaB signaling	0.00392827	1
biological_process	GO:0000305	response to oxygen radical	0.00394516	1
biological_process	GO:0032728	positive regulation of interferon-beta production	0.00394516	1
biological_process	GO:0046596	regulation of viral entry into host cell	0.00394516	1
biological_process	GO:0071549	cellular response to dexamethasone stimulus	0.00394516	1
biological_process	GO:0050868	negative regulation of T cell activation	0.00395561	1
biological_process	GO:0000186	activation of MAPKK activity	0.00395946	1
biological_process	GO:0031638	zymogen activation	0.00395946	1
biological_process	GO:0045661	regulation of myoblast differentiation	0.00395946	1
biological_process	GO:0045851	pH reduction	0.00395946	1
biological_process	GO:0007059	chromosome segregation	0.00396971	1
biological_process	GO:0051817	modulation of process of other organism involved in symbiotic interaction	0.00399677	1
biological_process	GO:0032200	telomere organization	0.0040052	1
biological_process	GO:0001505	regulation of neurotransmitter levels	0.00403163	1
biological_process	GO:0090132	epithelium migration	0.00403163	1
biological_process	GO:0120039	plasma membrane bounded cell projection morphogenesis	0.00403183	1
biological_process	GO:0051279	regulation of release of sequestered calcium ion into cytosol	0.00408141	1
biological_process	GO:0030031	cell projection assembly	0.00408526	1
biological_process	GO:0007507	heart development	0.00409022	1
biological_process	GO:0009147	pyrimidine nucleoside triphosphate metabolic process	0.00410337	1
biological_process	GO:0019827	stem cell population maintenance	0.00412883	1
biological_process	GO:0002792	negative regulation of peptide secretion	0.00415942	1
biological_process	GO:0035304	regulation of protein dephosphorylation	0.00416309	1
biological_process	GO:1901796	regulation of signal transduction by p53 class mediator	0.00419772	1
biological_process	GO:0009892	negative regulation of metabolic process	0.00428793	1
biological_process	GO:0048812	neuron projection morphogenesis	0.00429437	1
biological_process	GO:0031398	positive regulation of protein ubiquitination	0.00431951	1
biological_process	GO:0070661	leukocyte proliferation	0.00432951	1
biological_process	GO:0010574	regulation of vascular endothelial growth factor production	0.00434582	1
biological_process	GO:0070670	response to interleukin-4	0.00434582	1
biological_process	GO:0006928	movement of cell or subcellular component	0.00444437	1
biological_process	GO:0060271	cilium assembly	0.00446066	1
biological_process	GO:0007517	muscle organ development	0.00447666	1
biological_process	GO:0009240	isopentenyl diphosphate biosynthetic process	0.0044943	1
biological_process	GO:0032763	regulation of mast cell cytokine production	0.0044943	1
biological_process	GO:0035523	protein K29-linked deubiquitination	0.0044943	1
biological_process	GO:0045345	positive regulation of MHC class I biosynthetic process	0.0044943	1
biological_process	GO:0045578	negative regulation of B cell differentiation	0.0044943	1
biological_process	GO:0046490	isopentenyl diphosphate metabolic process	0.0044943	1
biological_process	GO:0050747	positive regulation of lipoprotein metabolic process	0.0044943	1
biological_process	GO:0060681	branch elongation involved in ureteric bud branching	0.0044943	1
biological_process	GO:0070345	negative regulation of fat cell proliferation	0.0044943	1
biological_process	GO:0071224	cellular response to peptidoglycan	0.0044943	1
biological_process	GO:0071284	cellular response to lead ion	0.0044943	1
biological_process	GO:0071332	cellular response to fructose stimulus	0.0044943	1
biological_process	GO:1903223	positive regulation of oxidative stress-induced neuron death	0.0044943	1
biological_process	GO:2000630	positive regulation of miRNA metabolic process	0.0044943	1
biological_process	GO:0006778	porphyrin-containing compound metabolic process	0.00463284	1
biological_process	GO:0048246	macrophage chemotaxis	0.00463284	1
biological_process	GO:0071604	transforming growth factor beta production	0.00463284	1
biological_process	GO:0031669	cellular response to nutrient levels	0.00468281	1
biological_process	GO:0045428	regulation of nitric oxide biosynthetic process	0.00469407	1
biological_process	GO:0033865	nucleoside bisphosphate metabolic process	0.00474226	1
biological_process	GO:0033875	ribonucleoside bisphosphate metabolic process	0.00474226	1
biological_process	GO:0034032	purine nucleoside bisphosphate metabolic process	0.00474226	1
biological_process	GO:0051656	establishment of organelle localization	0.0047464	1
biological_process	GO:0046034	ATP metabolic process	0.00479753	1
biological_process	GO:0032201	telomere maintenance via semi-conservative replication	0.00484104	1
biological_process	GO:0036475	neuron death in response to oxidative stress	0.00484104	1
biological_process	GO:0071450	cellular response to oxygen radical	0.00484104	1
biological_process	GO:0071451	cellular response to superoxide	0.00484104	1
biological_process	GO:1902175	regulation of oxidative stress-induced intrinsic apoptotic signaling pathway	0.00484104	1
biological_process	GO:0042509	regulation of tyrosine phosphorylation of STAT protein	0.00486098	1
biological_process	GO:0002320	lymphoid progenitor cell differentiation	0.00486798	1
biological_process	GO:0032816	positive regulation of natural killer cell activation	0.00486798	1
biological_process	GO:0035458	cellular response to interferon-beta	0.00486798	1
biological_process	GO:0042053	regulation of dopamine metabolic process	0.00486798	1
biological_process	GO:0042069	regulation of catecholamine metabolic process	0.00486798	1
biological_process	GO:0050860	negative regulation of T cell receptor signaling pathway	0.00486798	1
biological_process	GO:0061900	glial cell activation	0.00490061	1
biological_process	GO:0010883	regulation of lipid storage	0.00492988	1
biological_process	GO:0033628	regulation of cell adhesion mediated by integrin	0.00492988	1
biological_process	GO:0071675	regulation of mononuclear cell migration	0.00492988	1
biological_process	GO:0002763	positive regulation of myeloid leukocyte differentiation	0.00495712	1
biological_process	GO:0006636	unsaturated fatty acid biosynthetic process	0.00495712	1
biological_process	GO:0055067	monovalent inorganic cation homeostasis	0.00498995	1
biological_process	GO:0009101	glycoprotein biosynthetic process	0.00499308	1
biological_process	GO:0030182	neuron differentiation	0.005002	1
biological_process	GO:0042590	antigen processing and presentation of exogenous peptide antigen via MHC class I	0.00508002	1
biological_process	GO:0002703	regulation of leukocyte mediated immunity	0.00511206	1
biological_process	GO:0018108	peptidyl-tyrosine phosphorylation	0.0051511	1
biological_process	GO:0051048	negative regulation of secretion	0.00515643	1
biological_process	GO:0051960	regulation of nervous system development	0.00516001	1
biological_process	GO:0007264	small GTPase mediated signal transduction	0.00522149	1
biological_process	GO:0051962	positive regulation of nervous system development	0.00522329	1
biological_process	GO:0019884	antigen processing and presentation of exogenous antigen	0.00525348	1
biological_process	GO:0043401	steroid hormone mediated signaling pathway	0.00525348	1
biological_process	GO:0098727	maintenance of cell number	0.00525851	1
biological_process	GO:0097529	myeloid leukocyte migration	0.00528387	1
biological_process	GO:0002479	antigen processing and presentation of exogenous peptide antigen via MHC class I, TAP-dependent	0.00529531	1
biological_process	GO:1903201	regulation of oxidative stress-induced cell death	0.00529531	1
biological_process	GO:0071621	granulocyte chemotaxis	0.00537549	1
biological_process	GO:0002675	positive regulation of acute inflammatory response	0.00539725	1
biological_process	GO:0002724	regulation of T cell cytokine production	0.00539725	1
biological_process	GO:0032770	positive regulation of monooxygenase activity	0.00539725	1
biological_process	GO:0045648	positive regulation of erythrocyte differentiation	0.00539725	1
biological_process	GO:0045598	regulation of fat cell differentiation	0.00540342	1
biological_process	GO:0010632	regulation of epithelial cell migration	0.00541465	1
biological_process	GO:0032649	regulation of interferon-gamma production	0.00545825	1
biological_process	GO:0046632	alpha-beta T cell differentiation	0.00545825	1
biological_process	GO:0006767	water-soluble vitamin metabolic process	0.00548141	1
biological_process	GO:0009060	aerobic respiration	0.00548141	1
biological_process	GO:0000904	cell morphogenesis involved in differentiation	0.00564855	1
biological_process	GO:0050679	positive regulation of epithelial cell proliferation	0.00566668	1
biological_process	GO:0007076	mitotic chromosome condensation	0.00566927	1
biological_process	GO:0009070	serine family amino acid biosynthetic process	0.00566927	1
biological_process	GO:0010224	response to UV-B	0.00566927	1
biological_process	GO:0046365	monosaccharide catabolic process	0.00569921	1
biological_process	GO:0055123	digestive system development	0.00570953	1
biological_process	GO:0007265	Ras protein signal transduction	0.00573656	1
biological_process	GO:0046425	regulation of receptor signaling pathway via JAK-STAT	0.00575778	1
biological_process	GO:0001657	ureteric bud development	0.00577524	1
biological_process	GO:1902991	regulation of amyloid precursor protein catabolic process	0.00579189	1
biological_process	GO:1904031	positive regulation of cyclin-dependent protein kinase activity	0.00579189	1
biological_process	GO:0002424	T cell mediated immune response to tumor cell	0.00583502	1
biological_process	GO:0002840	regulation of T cell mediated immune response to tumor cell	0.00583502	1
biological_process	GO:0003275	apoptotic process involved in outflow tract morphogenesis	0.00583502	1
biological_process	GO:0006211	5-methylcytosine catabolic process	0.00583502	1
biological_process	GO:0019287	isopentenyl diphosphate biosynthetic process, mevalonate pathway	0.00583502	1
biological_process	GO:0019857	5-methylcytosine metabolic process	0.00583502	1
biological_process	GO:0030910	olfactory placode formation	0.00583502	1
biological_process	GO:0034343	type III interferon production	0.00583502	1
biological_process	GO:0034344	regulation of type III interferon production	0.00583502	1
biological_process	GO:0042335	cuticle development	0.00583502	1
biological_process	GO:0060584	regulation of prostaglandin-endoperoxide synthase activity	0.00583502	1
biological_process	GO:0060585	positive regulation of prostaglandin-endoperoxide synthase activity	0.00583502	1
biological_process	GO:0071698	olfactory placode development	0.00583502	1
biological_process	GO:0071699	olfactory placode morphogenesis	0.00583502	1
biological_process	GO:1901491	negative regulation of lymphangiogenesis	0.00583502	1
biological_process	GO:1902256	regulation of apoptotic process involved in outflow tract morphogenesis	0.00583502	1
biological_process	GO:2000361	regulation of prostaglandin-E synthase activity	0.00583502	1
biological_process	GO:2000363	positive regulation of prostaglandin-E synthase activity	0.00583502	1
biological_process	GO:2000670	positive regulation of dendritic cell apoptotic process	0.00583502	1
biological_process	GO:0046637	regulation of alpha-beta T cell differentiation	0.00587757	1
biological_process	GO:0051493	regulation of cytoskeleton organization	0.00590798	1
biological_process	GO:0010288	response to lead ion	0.00591353	1
biological_process	GO:0046426	negative regulation of receptor signaling pathway via JAK-STAT	0.00591353	1
biological_process	GO:0002819	regulation of adaptive immune response	0.00591517	1
biological_process	GO:0042136	neurotransmitter biosynthetic process	0.0059758	1
biological_process	GO:1901606	alpha-amino acid catabolic process	0.0059758	1
biological_process	GO:0043254	regulation of protein-containing complex assembly	0.00604539	1
biological_process	GO:0033273	response to vitamin	0.00610429	1
biological_process	GO:0050767	regulation of neurogenesis	0.00611318	1
biological_process	GO:0032613	interleukin-10 production	0.00615162	1
biological_process	GO:0008637	apoptotic mitochondrial changes	0.00615199	1
biological_process	GO:0008631	intrinsic apoptotic signaling pathway in response to oxidative stress	0.00619407	1
biological_process	GO:0019674	NAD metabolic process	0.00622798	1
biological_process	GO:0045599	negative regulation of fat cell differentiation	0.00622798	1
biological_process	GO:0051452	intracellular pH reduction	0.00622798	1
biological_process	GO:0070849	response to epidermal growth factor	0.00624736	1
biological_process	GO:0090151	establishment of protein localization to mitochondrial membrane	0.00624736	1
biological_process	GO:0040011	locomotion	0.00629985	1
biological_process	GO:0051224	negative regulation of protein transport	0.00630538	1
biological_process	GO:0048844	artery morphogenesis	0.00632539	1
biological_process	GO:0035335	peptidyl-tyrosine dephosphorylation	0.00634192	1
biological_process	GO:0002834	regulation of response to tumor cell	0.00640393	1
biological_process	GO:0002837	regulation of immune response to tumor cell	0.00640393	1
biological_process	GO:0006244	pyrimidine nucleotide catabolic process	0.00640393	1
biological_process	GO:0006268	DNA unwinding involved in DNA replication	0.00640393	1
biological_process	GO:0010421	hydrogen peroxide-mediated programmed cell death	0.00640393	1
biological_process	GO:0046940	nucleoside monophosphate phosphorylation	0.00640393	1
biological_process	GO:0051917	regulation of fibrinolysis	0.00640393	1
biological_process	GO:0070234	positive regulation of T cell apoptotic process	0.00640393	1
biological_process	GO:0097468	programmed cell death in response to reactive oxygen species	0.00640393	1
biological_process	GO:1904748	regulation of apoptotic process involved in development	0.00640393	1
biological_process	GO:0090130	tissue migration	0.00640517	1
biological_process	GO:0046427	positive regulation of receptor signaling pathway via JAK-STAT	0.00644445	1
biological_process	GO:0018212	peptidyl-tyrosine modification	0.00645659	1
biological_process	GO:0006644	phospholipid metabolic process	0.00647361	1
biological_process	GO:0034127	regulation of MyD88-independent toll-like receptor signaling pathway	0.00651622	1
biological_process	GO:0043353	enucleate erythrocyte differentiation	0.00651622	1
biological_process	GO:0045350	interferon-beta biosynthetic process	0.00651622	1
biological_process	GO:0045357	regulation of interferon-beta biosynthetic process	0.00651622	1
biological_process	GO:1901724	positive regulation of cell proliferation involved in kidney development	0.00651622	1
biological_process	GO:0002698	negative regulation of immune effector process	0.006562	1
biological_process	GO:0002532	production of molecular mediator involved in inflammatory response	0.00660417	1
biological_process	GO:0008406	gonad development	0.00664385	1
biological_process	GO:0043393	regulation of protein binding	0.00664385	1
biological_process	GO:0032196	transposition	0.0066951	1
biological_process	GO:0036296	response to increased oxygen levels	0.0066951	1
biological_process	GO:0072163	mesonephric epithelium development	0.00672544	1
biological_process	GO:0072164	mesonephric tubule development	0.00672544	1
biological_process	GO:0007266	Rho protein signal transduction	0.00672781	1
biological_process	GO:0048638	regulation of developmental growth	0.00673035	1
biological_process	GO:0048002	antigen processing and presentation of peptide antigen	0.00676344	1
biological_process	GO:0008654	phospholipid biosynthetic process	0.0067707	1
biological_process	GO:0000185	activation of MAPKKK activity	0.00684494	1
biological_process	GO:0002730	regulation of dendritic cell cytokine production	0.00684494	1
biological_process	GO:0007256	activation of JNKK activity	0.00684494	1
biological_process	GO:0018095	protein polyglutamylation	0.00684494	1
biological_process	GO:0031915	positive regulation of synaptic plasticity	0.00684494	1
biological_process	GO:0032494	response to peptidoglycan	0.00684494	1
biological_process	GO:0033089	positive regulation of T cell differentiation in thymus	0.00684494	1
biological_process	GO:0045351	type I interferon biosynthetic process	0.00684494	1
biological_process	GO:0070673	response to interleukin-18	0.00684494	1
biological_process	GO:0072110	glomerular mesangial cell proliferation	0.00684494	1
biological_process	GO:0090193	positive regulation of glomerulus development	0.00684494	1
biological_process	GO:1905146	lysosomal protein catabolic process	0.00684494	1
biological_process	GO:2001269	positive regulation of cysteine-type endopeptidase activity involved in apoptotic signaling pathway	0.00684494	1
biological_process	GO:0007162	negative regulation of cell adhesion	0.00686588	1
biological_process	GO:0033866	nucleoside bisphosphate biosynthetic process	0.00687474	1
biological_process	GO:0034030	ribonucleoside bisphosphate biosynthetic process	0.00687474	1
biological_process	GO:0034033	purine nucleoside bisphosphate biosynthetic process	0.00687474	1
biological_process	GO:0071230	cellular response to amino acid stimulus	0.00687474	1
biological_process	GO:0044344	cellular response to fibroblast growth factor stimulus	0.00690455	1
molecular_function	GO:0001730	2'-5'-oligoadenylate synthetase activity	0.00690777	1
molecular_function	GO:0003829	beta-1,3-galactosyl-O-glycosyl-glycoprotein beta-1,6-N-acetylglucosaminyltransferase activity	0.00690777	1
molecular_function	GO:0004477	methenyltetrahydrofolate cyclohydrolase activity	0.00690777	1
molecular_function	GO:0004487	methylenetetrahydrofolate dehydrogenase (NAD+) activity	0.00690777	1
molecular_function	GO:0015433	ATPase-coupled peptide antigen transmembrane transporter activity	0.00690777	1
molecular_function	GO:0016822	hydrolase activity, acting on acid carbon-carbon bonds	0.00690777	1
molecular_function	GO:0016823	hydrolase activity, acting on acid carbon-carbon bonds, in ketonic substances	0.00690777	1
molecular_function	GO:0050816	phosphothreonine residue binding	0.00690777	1
molecular_function	GO:0019904	protein domain specific binding	0.0069679	1
biological_process	GO:0006766	vitamin metabolic process	0.00698554	1
biological_process	GO:0007224	smoothened signaling pathway	0.00698554	1
biological_process	GO:0048565	digestive tract development	0.00698554	1
biological_process	GO:0010822	positive regulation of mitochondrion organization	0.0069974	1
biological_process	GO:0022408	negative regulation of cell-cell adhesion	0.00700054	1
biological_process	GO:0046700	heterocycle catabolic process	0.00700674	1
biological_process	GO:0070646	protein modification by small protein removal	0.0070593	1
molecular_function	GO:0016538	cyclin-dependent protein serine/threonine kinase regulator activity	0.00707811	1
biological_process	GO:0045017	glycerolipid biosynthetic process	0.00712017	1
biological_process	GO:0051289	protein homotetramerization	0.00712607	1
biological_process	GO:1990542	mitochondrial transmembrane transport	0.00712607	1
biological_process	GO:0043550	regulation of lipid kinase activity	0.00713119	1
biological_process	GO:0008652	cellular amino acid biosynthetic process	0.00715197	1
biological_process	GO:0001779	natural killer cell differentiation	0.00717471	1
biological_process	GO:0001956	positive regulation of neurotransmitter secretion	0.00717471	1
biological_process	GO:0006907	pinocytosis	0.00717471	1
biological_process	GO:0009081	branched-chain amino acid metabolic process	0.00717471	1
biological_process	GO:0009083	branched-chain amino acid catabolic process	0.00717471	1
biological_process	GO:0030728	ovulation	0.00717471	1
biological_process	GO:0042135	neurotransmitter catabolic process	0.00717471	1
biological_process	GO:0042403	thyroid hormone metabolic process	0.00717471	1
biological_process	GO:0043153	entrainment of circadian clock by photoperiod	0.00717471	1
biological_process	GO:2000737	negative regulation of stem cell differentiation	0.00717471	1
biological_process	GO:2000810	regulation of bicellular tight junction assembly	0.00717471	1
biological_process	GO:0016241	regulation of macroautophagy	0.0072268	1
biological_process	GO:0008210	estrogen metabolic process	0.00724346	1
biological_process	GO:0032814	regulation of natural killer cell activation	0.00724346	1
biological_process	GO:1900745	positive regulation of p38MAPK cascade	0.00724346	1
biological_process	GO:1902235	regulation of endoplasmic reticulum stress-induced intrinsic apoptotic signaling pathway	0.00724346	1
biological_process	GO:0033013	tetrapyrrole metabolic process	0.00736605	1
biological_process	GO:0070665	positive regulation of leukocyte proliferation	0.0073909	1
molecular_function	GO:0042625	ATPase-coupled ion transmembrane transporter activity	0.00741395	1
biological_process	GO:0030111	regulation of Wnt signaling pathway	0.00742565	1
molecular_function	GO:0042578	phosphoric ester hydrolase activity	0.00743277	1
biological_process	GO:0034764	positive regulation of transmembrane transport	0.00743561	1
biological_process	GO:1901657	glycosyl compound metabolic process	0.00747037	1
biological_process	GO:0006278	RNA-dependent DNA biosynthetic process	0.00751479	1
biological_process	GO:0042475	odontogenesis of dentin-containing tooth	0.00754323	1
biological_process	GO:0046148	pigment biosynthetic process	0.00756993	1
biological_process	GO:0090183	regulation of kidney development	0.00756993	1
biological_process	GO:0090307	mitotic spindle assembly	0.00756993	1
biological_process	GO:0006007	glucose catabolic process	0.00759696	1
biological_process	GO:0010573	vascular endothelial growth factor production	0.00759696	1
biological_process	GO:0030224	monocyte differentiation	0.00759696	1
biological_process	GO:0032733	positive regulation of interleukin-10 production	0.00759696	1
biological_process	GO:0071634	regulation of transforming growth factor beta production	0.00759696	1
biological_process	GO:0090322	regulation of superoxide metabolic process	0.00759696	1
biological_process	GO:0097242	amyloid-beta clearance	0.00759696	1
biological_process	GO:1901099	negative regulation of signal transduction in absence of ligand	0.00759696	1
biological_process	GO:1903131	mononuclear cell differentiation	0.00759696	1
biological_process	GO:2001240	negative regulation of extrinsic apoptotic signaling pathway in absence of ligand	0.00759696	1
biological_process	GO:0032653	regulation of interleukin-10 production	0.00773105	1
biological_process	GO:0032731	positive regulation of interleukin-1 beta production	0.00773105	1
biological_process	GO:1901568	fatty acid derivative metabolic process	0.00775092	1
biological_process	GO:0009611	response to wounding	0.00778934	1
biological_process	GO:0006734	NADH metabolic process	0.00779257	1
biological_process	GO:0009072	aromatic amino acid family metabolic process	0.00779257	1
biological_process	GO:0042026	protein refolding	0.00779257	1
biological_process	GO:0002711	positive regulation of T cell mediated immunity	0.00783472	1
biological_process	GO:0035272	exocrine system development	0.00783472	1
biological_process	GO:0097305	response to alcohol	0.00785629	1
biological_process	GO:0035307	positive regulation of protein dephosphorylation	0.00786272	1
biological_process	GO:0016477	cell migration	0.00787396	1
biological_process	GO:0071331	cellular response to hexose stimulus	0.00791139	1
biological_process	GO:1903322	positive regulation of protein modification by small protein conjugation or removal	0.00791139	1
biological_process	GO:1903825	organic acid transmembrane transport	0.00791139	1
biological_process	GO:1905039	carboxylic acid transmembrane transport	0.00791139	1
biological_process	GO:0002526	acute inflammatory response	0.00794905	1
biological_process	GO:0043666	regulation of phosphoprotein phosphatase activity	0.00800555	1
biological_process	GO:0070507	regulation of microtubule cytoskeleton organization	0.00805144	1
molecular_function	GO:0016887	ATPase activity	0.00821303	1
biological_process	GO:0002702	positive regulation of production of molecular mediator of immune response	0.00828495	1
biological_process	GO:0031146	SCF-dependent proteasomal ubiquitin-dependent protein catabolic process	0.00828495	1
biological_process	GO:0002719	negative regulation of cytokine production involved in immune response	0.00828913	1
biological_process	GO:0007026	negative regulation of microtubule depolymerization	0.00828913	1
biological_process	GO:0031639	plasminogen activation	0.00828913	1
biological_process	GO:0031664	regulation of lipopolysaccharide-mediated signaling pathway	0.00828913	1
biological_process	GO:0045662	negative regulation of myoblast differentiation	0.00828913	1
biological_process	GO:0072273	metanephric nephron morphogenesis	0.00828913	1
molecular_function	GO:0004706	JUN kinase kinase kinase activity	0.00837461	1
molecular_function	GO:0030235	nitric-oxide synthase regulator activity	0.00837461	1
molecular_function	GO:0034046	poly(G) binding	0.00837461	1
molecular_function	GO:0051920	peroxiredoxin activity	0.00837461	1
biological_process	GO:0010833	telomere maintenance via telomere lengthening	0.00842255	1
biological_process	GO:0030593	neutrophil chemotaxis	0.00846745	1
biological_process	GO:0032946	positive regulation of mononuclear cell proliferation	0.00846833	1
biological_process	GO:0051023	regulation of immunoglobulin secretion	0.00861306	1
biological_process	GO:0071371	cellular response to gonadotropin stimulus	0.00861306	1
biological_process	GO:0072077	renal vesicle morphogenesis	0.00861306	1
biological_process	GO:0072574	hepatocyte proliferation	0.00861306	1
biological_process	GO:0072575	epithelial cell proliferation involved in liver morphogenesis	0.00861306	1
biological_process	GO:1904872	regulation of telomerase RNA localization to Cajal body	0.00861306	1
biological_process	GO:2000319	regulation of T-helper 17 cell differentiation	0.00861306	1
biological_process	GO:0055082	cellular chemical homeostasis	0.00872347	1
biological_process	GO:0006310	DNA recombination	0.00877377	1
biological_process	GO:0031348	negative regulation of defense response	0.00877808	1
biological_process	GO:0045638	negative regulation of myeloid cell differentiation	0.00879146	1
biological_process	GO:0048468	cell development	0.00883001	1
biological_process	GO:0002443	leukocyte mediated immunity	0.00886588	1
biological_process	GO:0010803	regulation of tumor necrosis factor-mediated signaling pathway	0.00893035	1
biological_process	GO:0071326	cellular response to monosaccharide stimulus	0.00893699	1
biological_process	GO:0010575	positive regulation of vascular endothelial growth factor production	0.00906076	1
biological_process	GO:0018200	peptidyl-glutamic acid modification	0.00906076	1
biological_process	GO:0030511	positive regulation of transforming growth factor beta receptor signaling pathway	0.00906076	1
biological_process	GO:0035666	TRIF-dependent toll-like receptor signaling pathway	0.00906076	1
biological_process	GO:0070229	negative regulation of lymphocyte apoptotic process	0.00906076	1
biological_process	GO:1903846	positive regulation of cellular response to transforming growth factor beta stimulus	0.00906076	1
molecular_function	GO:0001094	TFIID-class transcription factor complex binding	0.00910744	1
molecular_function	GO:0003995	acyl-CoA dehydrogenase activity	0.00910744	1
molecular_function	GO:0016679	oxidoreductase activity, acting on diphenols and related substances as donors	0.00910744	1
biological_process	GO:0071774	response to fibroblast growth factor	0.00917141	1
biological_process	GO:0017038	protein import	0.00918918	1
biological_process	GO:0044272	sulfur compound biosynthetic process	0.00918918	1
biological_process	GO:0051310	metaphase plate congression	0.0092406	1
biological_process	GO:0050821	protein stabilization	0.00927341	1
biological_process	GO:0001892	embryonic placenta development	0.00932059	1
biological_process	GO:0014068	positive regulation of phosphatidylinositol 3-kinase signaling	0.00932059	1
biological_process	GO:0043507	positive regulation of JUN kinase activity	0.00934791	1
biological_process	GO:0072594	establishment of protein localization to organelle	0.0093798	1
biological_process	GO:0071103	DNA conformation change	0.00940205	1
biological_process	GO:0009749	response to glucose	0.0094502	1
biological_process	GO:1904950	negative regulation of establishment of protein localization	0.0094502	1
biological_process	GO:0045840	positive regulation of mitotic nuclear division	0.00951208	1
biological_process	GO:0050704	regulation of interleukin-1 secretion	0.00951208	1
biological_process	GO:0002756	MyD88-independent toll-like receptor signaling pathway	0.00955107	1
biological_process	GO:0010464	regulation of mesenchymal cell proliferation	0.00955107	1
biological_process	GO:0040001	establishment of mitotic spindle localization	0.00955107	1
biological_process	GO:0046633	alpha-beta T cell proliferation	0.00955107	1
biological_process	GO:0051443	positive regulation of ubiquitin-protein transferase activity	0.00955107	1
biological_process	GO:0002474	antigen processing and presentation of peptide antigen via MHC class I	0.00959403	1
biological_process	GO:0002534	cytokine production involved in inflammatory response	0.00972876	1
biological_process	GO:0097300	programmed necrotic cell death	0.00972876	1
biological_process	GO:2001238	positive regulation of extrinsic apoptotic signaling pathway	0.00972876	1
biological_process	GO:0045446	endothelial cell differentiation	0.00976029	1
biological_process	GO:0032943	mononuclear cell proliferation	0.00981383	1
biological_process	GO:0002709	regulation of T cell mediated immunity	0.0098193	1
biological_process	GO:0007004	telomere maintenance via telomerase	0.0098193	1
biological_process	GO:0035264	multicellular organism growth	0.00983677	1
biological_process	GO:0044270	cellular nitrogen compound catabolic process	0.0098583	1
biological_process	GO:0051204	protein insertion into mitochondrial membrane	0.00987029	1
biological_process	GO:0034122	negative regulation of toll-like receptor signaling pathway	0.00991085	1
molecular_function	GO:0017111	nucleoside-triphosphatase activity	0.0100114	1
biological_process	GO:0032984	protein-containing complex disassembly	0.0100522	1
molecular_function	GO:0051219	phosphoprotein binding	0.0100613	1
molecular_function	GO:0016462	pyrophosphatase activity	0.0101268	1
biological_process	GO:0009263	deoxyribonucleotide biosynthetic process	0.0101611	1
biological_process	GO:0032352	positive regulation of hormone metabolic process	0.0101611	1
biological_process	GO:0034616	response to laminar fluid shear stress	0.0101611	1
biological_process	GO:0042976	activation of Janus kinase activity	0.0101611	1
biological_process	GO:0043584	nose development	0.0101611	1
biological_process	GO:0045073	regulation of chemokine biosynthetic process	0.0101611	1
biological_process	GO:0045898	regulation of RNA polymerase II transcriptional preinitiation complex assembly	0.0101611	1
biological_process	GO:0060339	negative regulation of type I interferon-mediated signaling pathway	0.0101611	1
biological_process	GO:0071599	otic vesicle development	0.0101611	1
biological_process	GO:0072283	metanephric renal vesicle morphogenesis	0.0101611	1
biological_process	GO:0090177	establishment of planar polarity involved in neural tube closure	0.0101611	1
biological_process	GO:0090192	regulation of glomerulus development	0.0101611	1
biological_process	GO:1900119	positive regulation of execution phase of apoptosis	0.0101611	1
biological_process	GO:1902187	negative regulation of viral release from host cell	0.0101611	1
biological_process	GO:1904894	positive regulation of receptor signaling pathway via STAT	0.0102035	1
biological_process	GO:0000002	mitochondrial genome maintenance	0.010231	1
biological_process	GO:0032069	regulation of nuclease activity	0.010231	1
biological_process	GO:0035024	negative regulation of Rho protein signal transduction	0.010231	1
biological_process	GO:0044342	type B pancreatic cell proliferation	0.010231	1
biological_process	GO:0045649	regulation of macrophage differentiation	0.010231	1
biological_process	GO:0090312	positive regulation of protein deacetylation	0.010231	1
biological_process	GO:0002687	positive regulation of leukocyte migration	0.0102571	1
biological_process	GO:0040014	regulation of multicellular organism growth	0.0102894	1
molecular_function	GO:0004725	protein tyrosine phosphatase activity	0.0103609	1
biological_process	GO:0030856	regulation of epithelial cell differentiation	0.0106832	1
cellular_component	GO:0042824	MHC class I peptide loading complex	0.0107018	1
cellular_component	GO:0097342	ripoptosome	0.0107018	1
biological_process	GO:0043010	camera-type eye development	0.0107474	1
biological_process	GO:0044087	regulation of cellular component biogenesis	0.0107803	1
biological_process	GO:0006457	protein folding	0.0108307	1
biological_process	GO:0043506	regulation of JUN kinase activity	0.0108441	1
biological_process	GO:0070125	mitochondrial translational elongation	0.0108441	1
biological_process	GO:1903321	negative regulation of protein modification by small protein conjugation or removal	0.0108441	1
biological_process	GO:0060537	muscle tissue development	0.0108561	1
biological_process	GO:0048568	embryonic organ development	0.0109182	1
molecular_function	GO:0004860	protein kinase inhibitor activity	0.0110125	1
biological_process	GO:0043524	negative regulation of neuron apoptotic process	0.0110174	1
biological_process	GO:0046173	polyol biosynthetic process	0.0110301	1
biological_process	GO:0150076	neuroinflammatory response	0.0110301	1
biological_process	GO:0032635	interleukin-6 production	0.0110857	1
biological_process	GO:0032612	interleukin-1 production	0.0111122	1
biological_process	GO:0046660	female sex differentiation	0.0111122	1
biological_process	GO:0070925	organelle assembly	0.0111411	1
biological_process	GO:0009116	nucleoside metabolic process	0.0111464	1
biological_process	GO:0035306	positive regulation of dephosphorylation	0.0111936	1
biological_process	GO:0030206	chondroitin sulfate biosynthetic process	0.0113337	1
biological_process	GO:0033561	regulation of water loss via skin	0.0113337	1
biological_process	GO:0048596	embryonic camera-type eye morphogenesis	0.0113337	1
biological_process	GO:0060037	pharyngeal system development	0.0113337	1
biological_process	GO:0072539	T-helper 17 cell differentiation	0.0113337	1
biological_process	GO:0080111	DNA demethylation	0.0113337	1
biological_process	GO:0097066	response to thyroid hormone	0.0113337	1
biological_process	GO:1903203	regulation of oxidative stress-induced neuron death	0.0113337	1
biological_process	GO:0030705	cytoskeleton-dependent intracellular transport	0.0113695	1
cellular_component	GO:0044294	dendritic growth cone	0.0114192	1
cellular_component	GO:0065010	extracellular membrane-bounded organelle	0.0114192	1
cellular_component	GO:0005871	kinesin complex	0.0114813	1
biological_process	GO:0045445	myoblast differentiation	0.0115155	1
biological_process	GO:0006102	isocitrate metabolic process	0.011556	1
biological_process	GO:0010032	meiotic chromosome condensation	0.011556	1
biological_process	GO:0010968	regulation of microtubule nucleation	0.011556	1
biological_process	GO:0015822	ornithine transport	0.011556	1
biological_process	GO:0016321	female meiosis chromosome segregation	0.011556	1
biological_process	GO:0032020	ISG15-protein conjugation	0.011556	1
biological_process	GO:0032329	serine transport	0.011556	1
biological_process	GO:0034201	response to oleic acid	0.011556	1
biological_process	GO:0035964	COPI-coated vesicle budding	0.011556	1
biological_process	GO:0036265	RNA (guanine-N7)-methylation	0.011556	1
biological_process	GO:0042091	interleukin-10 biosynthetic process	0.011556	1
biological_process	GO:0045074	regulation of interleukin-10 biosynthetic process	0.011556	1
biological_process	GO:0048200	Golgi transport vesicle coating	0.011556	1
biological_process	GO:0048205	COPI coating of Golgi vesicle	0.011556	1
biological_process	GO:0061156	pulmonary artery morphogenesis	0.011556	1
biological_process	GO:0097527	necroptotic signaling pathway	0.011556	1
biological_process	GO:1902177	positive regulation of oxidative stress-induced intrinsic apoptotic signaling pathway	0.011556	1
biological_process	GO:1902218	regulation of intrinsic apoptotic signaling pathway in response to osmotic stress	0.011556	1
biological_process	GO:1903352	L-ornithine transmembrane transport	0.011556	1
biological_process	GO:1904415	regulation of xenophagy	0.011556	1
biological_process	GO:1904417	positive regulation of xenophagy	0.011556	1
biological_process	GO:1990668	vesicle fusion with endoplasmic reticulum-Golgi intermediate compartment (ERGIC) membrane	0.011556	1
biological_process	GO:0022604	regulation of cell morphogenesis	0.0115782	1
molecular_function	GO:0051082	unfolded protein binding	0.0116019	1
biological_process	GO:0006584	catecholamine metabolic process	0.0116049	1
biological_process	GO:0007091	metaphase/anaphase transition of mitotic cell cycle	0.0116049	1
biological_process	GO:0009712	catechol-containing compound metabolic process	0.0116049	1
biological_process	GO:0035384	thioester biosynthetic process	0.0116049	1
biological_process	GO:0071616	acyl-CoA biosynthetic process	0.0116049	1
biological_process	GO:0009100	glycoprotein metabolic process	0.0116148	1
biological_process	GO:0045137	development of primary sexual characteristics	0.0116188	1
biological_process	GO:0003337	mesenchymal to epithelial transition involved in metanephros morphogenesis	0.0116222	1
biological_process	GO:0030208	dermatan sulfate biosynthetic process	0.0116222	1
biological_process	GO:0035751	regulation of lysosomal lumen pH	0.0116222	1
biological_process	GO:0042416	dopamine biosynthetic process	0.0116222	1
biological_process	GO:0045080	positive regulation of chemokine biosynthetic process	0.0116222	1
biological_process	GO:0060707	trophoblast giant cell differentiation	0.0116222	1
biological_process	GO:0060900	embryonic camera-type eye formation	0.0116222	1
biological_process	GO:0071888	macrophage apoptotic process	0.0116222	1
biological_process	GO:0090085	regulation of protein deubiquitination	0.0116222	1
biological_process	GO:0097201	negative regulation of transcription from RNA polymerase II promoter in response to stress	0.0116222	1
biological_process	GO:1901298	regulation of hydrogen peroxide-mediated programmed cell death	0.0116222	1
biological_process	GO:0071479	cellular response to ionizing radiation	0.0116321	1
molecular_function	GO:0016817	hydrolase activity, acting on acid anhydrides	0.0116363	1
molecular_function	GO:0016818	hydrolase activity, acting on acid anhydrides, in phosphorus-containing anhydrides	0.0116363	1
biological_process	GO:0016570	histone modification	0.0116387	1
biological_process	GO:0022612	gland morphogenesis	0.0117729	1
biological_process	GO:0035296	regulation of tube diameter	0.0118243	1
biological_process	GO:0097746	regulation of blood vessel diameter	0.0118243	1
biological_process	GO:0046907	intracellular transport	0.0118304	1
biological_process	GO:0031570	DNA integrity checkpoint	0.0119028	1
biological_process	GO:0001823	mesonephros development	0.0119079	1
biological_process	GO:0046640	regulation of alpha-beta T cell proliferation	0.0120224	1
biological_process	GO:0050869	negative regulation of B cell activation	0.0120224	1
biological_process	GO:0090200	positive regulation of release of cytochrome c from mitochondria	0.0120224	1
biological_process	GO:0098813	nuclear chromosome segregation	0.0120634	1
biological_process	GO:0090316	positive regulation of intracellular protein transport	0.0122092	1
molecular_function	GO:0016787	hydrolase activity	0.0122396	1
biological_process	GO:1900015	regulation of cytokine production involved in inflammatory response	0.0122608	1
molecular_function	GO:0043027	cysteine-type endopeptidase inhibitor activity involved in apoptotic process	0.0123395	1
biological_process	GO:0046651	lymphocyte proliferation	0.0123478	1
[truncated: 20,752 more rows]
