# Supplementary material for: Rapid Identification of Druggable Targets and the Power of the PHENotype SIMulator for Effective Drug Repurposing in COVID-19
Source: Research Square preprint supplement (doi:10.21203/rs.3.rs-287183/v1), 2021-04-14
Supplement: Supplementary file 26 [file NHBE.xlsx]

## Sheet: MITHrIL
Pathway.Id	Pathway.Name	Impact.Factor	Probability.Pi	Probability.Network	Corrected.Accumulator	pValue	Adjusted.pValue
path:hsa04060	Cytokine-cytokine receptor interaction	10.4333	0.000214362	4.9975e-06	14.86	9.90019e-09	2.47505e-06
path:hsa04630	JAK-STAT signaling pathway	8.0808	0.00526383	4.9975e-06	15.6573	4.06403e-07	5.08003e-05
path:hsa04061	Viral protein interaction with cytokine and cytokine receptor	8.58239	0.00114109	0.00049975	6.02548	3.66098e-06	0.000305081
path:hsa00770	Pantothenate and CoA biosynthesis	9.55854	0.00103295	0.003998	7.47901	2.52045e-05	0.00126022
path:hsa04064	NF-kappa B signaling pathway	10.8504	9.96396e-05	0.021989	4.16578	2.5098e-05	0.00126022
path:hsa04610	Complement and coagulation cascades	9.8061	0.000333345	0.021989	2.40492	6.39272e-05	0.00266363
path:hsa04659	Th17 cell differentiation	6.60522	0.207497	4.9975e-06	9.41139	0.000107851	0.00385183
path:hsa04151	PI3K-Akt signaling pathway	5.22843	0.0533963	0.0089955	9.24572	0.00245193	0.0766228
path:hsa04625	C-type lectin receptor signaling pathway	6.20694	0.0312447	0.0284858	5.5869	0.00387004	0.096751
path:hsa00472	D-Arginine and D-ornithine metabolism	0	1	0.00349825	-0.000874116	0.00349825	0.096751
path:hsa04621	NOD-like receptor signaling pathway	7.19354	0.00625114	0.12044	3.26601	0.00472422	0.107369
path:hsa04068	FoxO signaling pathway	5.60715	0.0405101	0.051974	4.53825	0.008574	0.151004
path:hsa04217	Necroptosis	6.53824	0.0520948	0.0429785	4.13341	0.00906024	0.151004
path:hsa04672	Intestinal immune network for IgA production	0	1	0.007996	2.03896	0.007996	0.151004
path:hsa04550	Signaling pathways regulating pluripotency of stem cells	0	1	0.0114943	6.10153	0.0114943	0.179598
path:hsa04935	Growth hormone synthesis, secretion and action	0	1	0.013993	8.5843	0.013993	0.194347
path:hsa04658	Th1 and Th2 cell differentiation	0	1	0.0134933	6.12811	0.0134933	0.194347
path:hsa04080	Neuroactive ligand-receptor interaction	6.6794	0.437334	0.0029985	7.02086	0.0199577	0.207893
path:hsa04917	Prolactin signaling pathway	0	1	0.0189905	5.93056	0.0189905	0.207893
path:hsa04670	Leukocyte transendothelial migration	6.27528	0.236268	0.0114943	5.84291	0.0171872	0.207893
path:hsa04066	HIF-1 signaling pathway	4.78778	0.242761	0.009995	5.44174	0.016247	0.207893
path:hsa04920	Adipocytokine signaling pathway	0	1	0.0174913	3.5456	0.0174913	0.207893
path:hsa00471	D-Glutamine and D-glutamate metabolism	0	1	0.0194903	-0.0752531	0.0194903	0.207893
path:hsa04062	Chemokine signaling pathway	6.7771	0.358192	0.00749625	11.8645	0.0240226	0.240226
path:hsa04657	IL-17 signaling pathway	5.06536	0.0388456	0.16042	0.624707	0.0256192	0.246339
path:hsa04650	Natural killer cell mediated cytotoxicity	6.3375	0.242761	0.0254873	5.74333	0.0305186	0.279115
path:hsa04213	Longevity regulating pathway - multiple species	5.09359	0.144314	0.0604698	2.4355	0.0323774	0.279115
path:hsa04144	Endocytosis	0	1	0.031984	1.86922	0.031984	0.279115
path:hsa04964	Proximal tubule bicarbonate reclamation	0	1	0.033983	-0.0602366	0.033983	0.283192
path:hsa04360	Axon guidance	0	1	0.0384808	5.04092	0.0384808	0.291521
path:hsa04923	Regulation of lipolysis in adipocytes	0	1	0.0384808	3.21352	0.0384808	0.291521
path:hsa04960	Aldosterone-regulated sodium reabsorption	0	1	0.0384808	2.16905	0.0384808	0.291521
path:hsa04015	Rap1 signaling pathway	11.7075	0.409266	0.0364818	7.26141	0.0763415	0.292005
path:hsa04072	Phospholipase D signaling pathway	9.56712	0.257702	0.0394803	5.6997	0.0443642	0.292005
path:hsa04722	Neurotrophin signaling pathway	0	1	0.0574713	5.41609	0.0574713	0.292005
path:hsa04012	ErbB signaling pathway	0	1	0.047976	5.28256	0.047976	0.292005
path:hsa04380	Osteoclast differentiation	8.63847	0.288755	0.0394803	5.09105	0.0509109	0.292005
path:hsa04750	Inflammatory mediator regulation of TRP channels	0	1	0.03998	4.86723	0.03998	0.292005
path:hsa04071	Sphingolipid signaling pathway	0	1	0.0624688	4.55133	0.0624688	0.292005
path:hsa04611	Platelet activation	0	1	0.0694653	4.47407	0.0694653	0.292005
path:hsa04660	T cell receptor signaling pathway	0	1	0.0714643	4.36831	0.0714643	0.292005
path:hsa04926	Relaxin signaling pathway	0	1	0.0909545	4.29742	0.0909545	0.292005
path:hsa04725	Cholinergic synapse	0	1	0.05997	4.2759	0.05997	0.292005
path:hsa04664	Fc epsilon RI signaling pathway	0	1	0.0629685	4.11911	0.0629685	0.292005
path:hsa04915	Estrogen signaling pathway	0	1	0.0794603	4.10058	0.0794603	0.292005
path:hsa04919	Thyroid hormone signaling pathway	0	1	0.0664668	4.10034	0.0664668	0.292005
path:hsa04370	VEGF signaling pathway	0	1	0.0634683	3.91762	0.0634683	0.292005
path:hsa04914	Progesterone-mediated oocyte maturation	0	1	0.0594703	3.61118	0.0594703	0.292005
path:hsa04910	Insulin signaling pathway	0	1	0.0734633	3.55597	0.0734633	0.292005
path:hsa04540	Gap junction	7.31748	0.191568	0.07996	3.41795	0.0536536	0.292005
path:hsa04620	Toll-like receptor signaling pathway	4.55191	0.209747	0.0909545	3.39426	0.0649162	0.292005
path:hsa04150	mTOR signaling pathway	0	1	0.0909545	3.33805	0.0909545	0.292005
path:hsa04662	B cell receptor signaling pathway	0	1	0.091954	3.16103	0.091954	0.292005
path:hsa04022	cGMP-PKG signaling pathway	0	1	0.097951	3.11911	0.097951	0.292005
path:hsa04218	Cellular senescence	0	1	0.097951	3.09032	0.097951	0.292005
path:hsa04666	Fc gamma R-mediated phagocytosis	0	1	0.10045	3.08846	0.10045	0.292005
path:hsa04070	Phosphatidylinositol signaling system	0	1	0.0924538	3.04984	0.0924538	0.292005
path:hsa04020	Calcium signaling pathway	0	1	0.071964	2.97899	0.071964	0.292005
path:hsa04261	Adrenergic signaling in cardiomyocytes	0	1	0.0989505	2.95246	0.0989505	0.292005
path:hsa04211	Longevity regulating pathway	5.25392	0.18	0.09995	2.46834	0.0601332	0.292005
path:hsa04152	AMPK signaling pathway	0	1	0.0984508	2.46123	0.0984508	0.292005
path:hsa04973	Carbohydrate digestion and absorption	0	1	0.065967	1.98408	0.065967	0.292005
path:hsa04514	Cell adhesion molecules (CAMs)	3.00999	0.280601	0.0754623	1.29205	0.0768667	0.292005
path:hsa01200	Carbon metabolism	0	1	0.0809595	-0.406451	0.0809595	0.292005
path:hsa01230	Biosynthesis of amino acids	0	1	0.0884558	-0.220376	0.0884558	0.292005
path:hsa00740	Riboflavin metabolism	0	1	0.0714643	0.213345	0.0714643	0.292005
path:hsa04623	Cytosolic DNA-sensing pathway	4.31618	0.0814355	0.333833	0.175703	0.0984642	0.292005
path:hsa00600	Sphingolipid metabolism	0	1	0.0724638	-0.0766477	0.0724638	0.292005
path:hsa03018	RNA degradation	0	1	0.0529735	0.0736695	0.0529735	0.292005
path:hsa00250	Alanine, aspartate and glutamate metabolism	0	1	0.0794603	-0.07269	0.0794603	0.292005
path:hsa00970	Aminoacyl-tRNA biosynthesis	0	1	0.0874563	-0.05536	0.0874563	0.292005
path:hsa00830	Retinol metabolism	0	1	0.0814593	-0.0507037	0.0814593	0.292005
path:hsa00220	Arginine biosynthesis	0	1	0.097951	-0.0505382	0.097951	0.292005
path:hsa00480	Glutathione metabolism	0	1	0.0909545	-0.0468156	0.0909545	0.292005
path:hsa00030	Pentose phosphate pathway	0	1	0.0594703	-0.0449645	0.0594703	0.292005
path:hsa01210	2-Oxocarboxylic acid metabolism	0	1	0.0509745	-0.0396029	0.0509745	0.292005
path:hsa00020	Citrate cycle (TCA cycle)	0	1	0.0914543	-0.0271859	0.0914543	0.292005
path:hsa00910	Nitrogen metabolism	0	1	0.0609695	-0.0228131	0.0609695	0.292005
path:hsa00860	Porphyrin and chlorophyll metabolism	0	1	0.0834583	-0.0226653	0.0834583	0.292005
path:hsa00450	Selenocompound metabolism	0	1	0.0789605	-0.00858928	0.0789605	0.292005
path:hsa00400	Phenylalanine, tyrosine and tryptophan biosynthesis	0	1	0.075962	-0.00462643	0.075962	0.292005
path:hsa00780	Biotin metabolism	0	1	0.10045	0.00404384	0.10045	0.292005
path:hsa00130	Ubiquinone and other terpenoid-quinone biosynthesis	0	1	0.0814593	-0.00156391	0.0814593	0.292005
path:hsa00430	Taurine and hypotaurine metabolism	0	1	0.071964	-0.000128415	0.071964	0.292005
path:hsa00290	Valine, leucine and isoleucine biosynthesis	0	1	0.0824588	-3.13854e-05	0.0824588	0.292005
path:hsa04014	Ras signaling pathway	9.85616	0.425938	0.0604698	5.70649	0.109602	0.29463
path:hsa04210	Apoptosis	4.60666	0.288755	0.110445	2.78847	0.103926	0.29463
path:hsa04979	Cholesterol metabolism	0	1	0.109445	0.0727722	0.109445	0.29463
path:hsa00340	Histidine metabolism	0	1	0.105947	-0.0247697	0.105947	0.29463
path:hsa00750	Vitamin B6 metabolism	0	1	0.108946	0.013528	0.108946	0.29463
path:hsa00120	Primary bile acid biosynthesis	0	1	0.106447	-0.00710536	0.106447	0.29463
path:hsa00785	Lipoic acid metabolism	0	1	0.102949	-5.79924e-07	0.102949	0.29463
path:hsa00100	Steroid biosynthesis	0	1	0.112444	-0.00704182	0.112444	0.299053
path:hsa00562	Inositol phosphate metabolism	0	1	0.114443	2.41899	0.114443	0.301165
path:hsa03440	Homologous recombination	0	1	0.11944	-0.10199	0.11944	0.308519
path:hsa00512	Mucin type O-glycan biosynthesis	0	1	0.12094	-0.00567469	0.12094	0.308519
path:hsa00601	Glycosphingolipid biosynthesis - lacto and neolacto series	0	1	0.12044	-0.000946762	0.12044	0.308519
path:hsa04916	Melanogenesis	0	1	0.123438	2.53888	0.123438	0.308596
path:hsa00330	Arginine and proline metabolism	0	1	0.123438	-0.0379534	0.123438	0.308596
path:hsa04730	Long-term depression	0	1	0.124938	2.53717	0.124938	0.309251
path:hsa00360	Phenylalanine metabolism	0	1	0.126437	-0.00716632	0.126437	0.309894
path:hsa04727	GABAergic synapse	0	1	0.131934	1.62408	0.131934	0.320228
path:hsa04710	Circadian rhythm	0	1	0.133933	0.21366	0.133933	0.321954
path:hsa04924	Renin secretion	0	1	0.135932	2.1304	0.135932	0.323648
path:hsa04810	Regulation of actin cytoskeleton	8.23178	0.415991	0.091954	4.60088	0.137937	0.325322
path:hsa04140	Autophagy - animal	0	1	0.13943	2.8713	0.13943	0.325468
path:hsa04024	cAMP signaling pathway	0	1	0.151424	2.7793	0.151424	0.325468
path:hsa04371	Apelin signaling pathway	6.01569	0.288755	0.187406	2.16858	0.153526	0.325468
path:hsa04723	Retrograde endocannabinoid signaling	0	1	0.153423	2.14769	0.153423	0.325468
path:hsa04726	Serotonergic synapse	0	1	0.154423	2.10822	0.154423	0.325468
path:hsa04971	Gastric acid secretion	0	1	0.152424	2.05654	0.152424	0.325468
path:hsa03460	Fanconi anemia pathway	0	1	0.152924	-0.125928	0.152924	0.325468
path:hsa04612	Antigen processing and presentation	0	1	0.150425	0.118421	0.150425	0.325468
path:hsa00620	Pyruvate metabolism	0	1	0.148926	-0.0159101	0.148926	0.325468
path:hsa00260	Glycine, serine and threonine metabolism	0	1	0.144928	-0.0146699	0.144928	0.325468
path:hsa00524	Neomycin, kanamycin and gentamicin biosynthesis	0	1	0.154423	-0.00561315	0.154423	0.325468
path:hsa00670	One carbon pool by folate	0	1	0.154923	-0.00509154	0.154923	0.325468
path:hsa00730	Thiamine metabolism	0	1	0.142929	-0.000158928	0.142929	0.325468
path:hsa04622	RIG-I-like receptor signaling pathway	0	1	0.158921	1.50419	0.158921	0.329753
path:hsa00140	Steroid hormone biosynthesis	0	1	0.15992	-0.0250004	0.15992	0.329753
path:hsa00604	Glycosphingolipid biosynthesis - ganglio series	0	1	0.16092	-0.00482055	0.16092	0.329753
path:hsa00980	Metabolism of xenobiotics by cytochrome P450	0	1	0.164918	-0.0206029	0.164918	0.335198
path:hsa04510	Focal adhesion	7.78412	0.415991	0.130435	4.00208	0.172317	0.347414
path:hsa04921	Oxytocin signaling pathway	0	1	0.175912	2.3248	0.175912	0.349032
path:hsa04668	TNF signaling pathway	0	1	0.175412	1.85975	0.175412	0.349032
path:hsa04010	MAPK signaling pathway	10.3414	0.529077	0.083958	5.09488	0.177882	0.350161
path:hsa04724	Glutamatergic synapse	0	1	0.181409	1.99729	0.181409	0.354315
path:hsa04130	SNARE interactions in vesicular transport	0	1	0.186407	-0.000374103	0.186407	0.361253
path:hsa00500	Starch and sucrose metabolism	0	1	0.187906	0.204286	0.187906	0.361358
path:hsa00310	Lysine degradation	0	1	0.189905	-0.0782159	0.189905	0.362414
path:hsa04928	Parathyroid hormone synthesis, secretion and action	0	1	0.196902	1.88537	0.196902	0.371055
path:hsa04145	Phagosome	0	1	0.197401	-0.00136817	0.197401	0.371055
path:hsa00900	Terpenoid backbone biosynthesis	0	1	0.1994	0.0374897	0.1994	0.372015
path:hsa04728	Dopaminergic synapse	0	1	0.205897	1.76869	0.205897	0.373002
path:hsa04714	Thermogenesis	0	1	0.203398	1.30368	0.203398	0.373002
path:hsa00590	Arachidonic acid metabolism	0	1	0.204898	-0.06746	0.204898	0.373002
path:hsa04614	Renin-angiotensin system	0	1	0.201899	-0.0045533	0.201899	0.373002
path:hsa04520	Adherens junction	0	1	0.209395	1.1561	0.209395	0.37392
path:hsa04390	Hippo signaling pathway	0	1	0.209395	0.918617	0.209395	0.37392
path:hsa04977	Vitamin digestion and absorption	0	1	0.210895	-0.000621082	0.210895	0.373927
path:hsa04912	GnRH signaling pathway	0	1	0.22089	1.96585	0.22089	0.386171
path:hsa04721	Synaptic vesicle cycle	0	1	0.21939	-0.022641	0.21939	0.386171
path:hsa04713	Circadian entrainment	0	1	0.237881	1.51289	0.237881	0.411863
path:hsa03320	PPAR signaling pathway	0	1	0.238881	0.215312	0.238881	0.411863
path:hsa00440	Phosphonate and phosphinate metabolism	0	1	0.24088	0.00168937	0.24088	0.412465
path:hsa04115	p53 signaling pathway	0	1	0.243878	0.262322	0.243878	0.414759
path:hsa00760	Nicotinate and nicotinamide metabolism	0	1	0.253873	0.203204	0.253873	0.42884
path:hsa04720	Long-term potentiation	0	1	0.26037	0.967454	0.26037	0.432731
path:hsa04961	Endocrine and other factor-regulated calcium reabsorption	0	1	0.261369	0.953723	0.261369	0.432731
path:hsa04978	Mineral absorption	0	1	0.26037	0.215175	0.26037	0.432731
path:hsa04962	Vasopressin-regulated water reabsorption	0	1	0.267866	0.166991	0.267866	0.438506
path:hsa00920	Sulfur metabolism	0	1	0.268366	0.00657691	0.268366	0.438506
path:hsa04922	Glucagon signaling pathway	0	1	0.275862	0.897562	0.275862	0.444489
path:hsa04918	Thyroid hormone synthesis	0	1	0.273863	0.647979	0.273863	0.444489
path:hsa04340	Hedgehog signaling pathway	0	1	0.277361	0.102544	0.277361	0.444489
path:hsa04976	Bile secretion	0	1	0.281359	0.130268	0.281359	0.448024
path:hsa04512	ECM-receptor interaction	0	1	0.285857	0.114825	0.285857	0.452305
path:hsa04350	TGF-beta signaling pathway	0	1	0.295352	0.189038	0.295352	0.46439
path:hsa04270	Vascular smooth muscle contraction	0	1	0.298851	0.973525	0.298851	0.465336
path:hsa04310	Wnt signaling pathway	0	1	0.306347	0.839189	0.306347	0.465336
path:hsa00240	Pyrimidine metabolism	0	1	0.304848	0.200378	0.304848	0.465336
path:hsa04913	Ovarian steroidogenesis	0	1	0.308846	0.174169	0.308846	0.465336
path:hsa04136	Autophagy - other	0	1	0.303848	0.162914	0.303848	0.465336
path:hsa04141	Protein processing in endoplasmic reticulum	0	1	0.310845	0.111142	0.310845	0.465336
path:hsa03013	RNA transport	0	1	0.310345	0.0255491	0.310345	0.465336
path:hsa00072	Synthesis and degradation of ketone bodies	0	1	0.30085	0.000196365	0.30085	0.465336
path:hsa04972	Pancreatic secretion	0	1	0.32034	0.58177	0.32034	0.46561
path:hsa04114	Oocyte meiosis	0	1	0.313343	0.544206	0.313343	0.46561
path:hsa04137	Mitophagy - animal	0	1	0.317841	0.492387	0.317841	0.46561
path:hsa00061	Fatty acid biosynthesis	0	1	0.318341	0.0234887	0.318341	0.46561
path:hsa04260	Cardiac muscle contraction	0	1	0.31934	-0.0217933	0.31934	0.46561
path:hsa04970	Salivary secretion	0	1	0.322839	0.641623	0.322839	0.46653
path:hsa01212	Fatty acid metabolism	0	1	0.324838	0.072942	0.324838	0.466721
path:hsa04925	Aldosterone synthesis and secretion	0	1	0.329335	0.673116	0.329335	0.470479
path:hsa00071	Fatty acid degradation	0	1	0.334833	0.075721	0.334833	0.470972
path:hsa04215	Apoptosis - multiple species	0	1	0.334333	0.0708692	0.334333	0.470972
path:hsa04216	Ferroptosis	0	1	0.335332	0.0489529	0.335332	0.470972
path:hsa00270	Cysteine and methionine metabolism	0	1	0.337331	0.0628658	0.337331	0.471133
path:hsa04911	Insulin secretion	0	1	0.349825	0.615009	0.349825	0.480529
path:hsa03015	mRNA surveillance pathway	0	1	0.346327	-0.00476821	0.346327	0.480529
path:hsa00232	Caffeine metabolism	0	1	0.348826	8.1753e-05	0.348826	0.480529
path:hsa00592	alpha-Linolenic acid metabolism	0	1	0.356822	0.0578185	0.356822	0.484812
path:hsa00515	Mannose type O-glycan biosynthesis	0	1	0.356822	0.00505787	0.356822	0.484812
path:hsa04975	Fat digestion and absorption	0	1	0.36032	0.0162114	0.36032	0.486919
path:hsa04330	Notch signaling pathway	0	1	0.364318	-0.0314772	0.364318	0.489675
path:hsa04744	Phototransduction	0	1	0.366817	0.0604602	0.366817	0.490397
path:hsa04110	Cell cycle	0	1	0.370815	0.0898841	0.370815	0.493105
path:hsa00565	Ether lipid metabolism	0	1	0.373313	0.0615096	0.373313	0.493801
path:hsa00591	Linoleic acid metabolism	0	1	0.376312	0.0479949	0.376312	0.495147
path:hsa00790	Folate biosynthesis	0	1	0.378811	0.0224665	0.378811	0.495825
path:hsa00513	Various types of N-glycan biosynthesis	0	1	0.385307	5.24345e-06	0.385307	0.501702
path:hsa04927	Cortisol synthesis and secretion	0	1	0.388306	0.392233	0.388306	0.502987
path:hsa04530	Tight junction	0	1	0.394803	0.353923	0.394803	0.507953
path:hsa00982	Drug metabolism - cytochrome P450	0	1	0.4008	0.0277135	0.4008	0.507953
path:hsa01040	Biosynthesis of unsaturated fatty acids	0	1	0.402299	0.00660708	0.402299	0.507953
path:hsa00650	Butanoate metabolism	0	1	0.401799	0.0055285	0.401799	0.507953
path:hsa00510	N-Glycan biosynthesis	0	1	0.3993	0.000125651	0.3993	0.507953
path:hsa00561	Glycerolipid metabolism	0	1	0.433783	0.0369561	0.433783	0.542018
path:hsa00563	Glycosylphosphatidylinositol (GPI)-anchor biosynthesis	0	1	0.435782	0.0203807	0.435782	0.542018
path:hsa04392	Hippo signaling pathway - multiple species	0	1	0.433783	0.00386407	0.433783	0.542018
path:hsa00230	Purine metabolism	0	1	0.454773	0.107142	0.454773	0.562837
path:hsa00564	Glycerophospholipid metabolism	0	1	0.484258	0.0164699	0.484258	0.585456
path:hsa04740	Olfactory transduction	0	1	0.48076	0.00612324	0.48076	0.585456
path:hsa00350	Tyrosine metabolism	0	1	0.478761	0.00539016	0.478761	0.585456
path:hsa00983	Drug metabolism - other enzymes	0	1	0.484758	0.00441598	0.484758	0.585456
path:hsa00051	Fructose and mannose metabolism	0	1	0.483758	0.00158578	0.483758	0.585456
path:hsa00190	Oxidative phosphorylation	0	1	0.494753	8.45815e-06	0.494753	0.594655
path:hsa00280	Valine, leucine and isoleucine degradation	0	1	0.50075	-0.000127119	0.50075	0.596131
path:hsa00053	Ascorbate and aldarate metabolism	0	1	0.50075	-3.48927e-05	0.50075	0.596131
path:hsa00380	Tryptophan metabolism	0	1	0.525737	-0.00426368	0.525737	0.62233
path:hsa00062	Fatty acid elongation	0	1	0.527736	-0.00128342	0.527736	0.62233
path:hsa00630	Glyoxylate and dicarboxylate metabolism	0	1	0.531734	-0.00985979	0.531734	0.624101
path:hsa01100	Metabolic pathways	0	1	0.549725	-1.0383	0.549725	0.642202
path:hsa00520	Amino sugar and nucleotide sugar metabolism	0	1	0.557221	-0.00259051	0.557221	0.647932
path:hsa00040	Pentose and glucuronate interconversions	0	1	0.570715	-0.0037761	0.570715	0.660549
path:hsa00640	Propanoate metabolism	0	1	0.592204	-0.00215672	0.592204	0.682263
path:hsa04742	Taste transduction	0	1	0.612194	-0.14635	0.612194	0.702057
path:hsa00052	Galactose metabolism	0	1	0.656672	-0.0108259	0.656672	0.749625
path:hsa00410	beta-Alanine metabolism	0	1	0.746127	-0.00736691	0.746127	0.847872
path:hsa00010	Glycolysis / Gluconeogenesis	0	1	0.763118	-0.0890509	0.763118	0.863256
path:hsa02010	ABC transporters	0	1	1	0	1	1
path:hsa00514	Other types of O-glycan biosynthesis	0	1	1	0	1	1
path:hsa00511	Other glycan degradation	0	1	1	0	1	1
remaining	remaining	1.07093	0.931524	1	0	0.931524	1
path:hsa03450	Non-homologous end-joining	0	1	1	0	1	1
path:hsa03420	Nucleotide excision repair	0	1	1	0	1	1
path:hsa04640	Hematopoietic cell lineage	0	1	1	0	1	1
path:hsa03430	Mismatch repair	0	1	1	0	1	1
path:hsa00603	Glycosphingolipid biosynthesis - globo and isoglobo series	0	1	1	0	1	1
path:hsa04974	Protein digestion and absorption	0	1	1	0	1	1
path:hsa03410	Base excision repair	0	1	1	0	1	1
path:hsa03060	Protein export	0	1	1	0	1	1
path:hsa04966	Collecting duct acid secretion	0	1	1	0	1	1
path:hsa03040	Spliceosome	0	1	1	0	1	1
path:hsa03050	Proteasome	0	1	1	0	1	1
path:hsa04146	Peroxisome	0	1	1	0	1	1
path:hsa04142	Lysosome	0	1	1	0	1	1
path:hsa03020	RNA polymerase	0	1	1	0	1	1
path:hsa03022	Basal transcription factors	0	1	1	0	1	1
path:hsa04122	Sulfur relay system	0	1	1	0	1	1
path:hsa03030	DNA replication	0	1	1	0	1	1
path:hsa04120	Ubiquitin mediated proteolysis	0	1	1	0	1	1
path:hsa04929	GnRH secretion	0	1	1	0	1	1
path:hsa00531	Glycosaminoglycan degradation	0	1	1	0	1	1
path:hsa00532	Glycosaminoglycan biosynthesis - chondroitin sulfate / dermatan sulfate	0	1	1	0	1	1
path:hsa00533	Glycosaminoglycan biosynthesis - keratan sulfate	0	1	1	0	1	1
path:hsa00534	Glycosaminoglycan biosynthesis - heparan sulfate / heparin	0	1	1	0	1	1
path:hsa03008	Ribosome biogenesis in eukaryotes	0	1	1	0	1	1
path:hsa03010	Ribosome	0	1	1	0	1	1

## Sheet: SPIA
Name	ID	pSize	NDE	pNDE	tA	pPERT	pG	pGFdr	pGFWER	Status
Cytokine-cytokine receptor interaction	04060	202	5	0.000252439	10.1815	5e-06	2.71251e-08	1.22063e-06	1.22063e-06	Activated
Measles	05162	116	5	1.81789e-05	-7.19663	0.085	2.22207e-05	0.000499965	0.00099993	Inhibited
NF-kappa B signaling pathway	04064	85	4	9.52007e-05	-3.29001	0.471	0.000493792	0.00614195	0.0222206	Inhibited
Influenza A	05164	151	5	6.4451e-05	-1.01963	0.777	0.000545951	0.00614195	0.0245678	Inhibited
Herpes simplex infection	05168	161	5	8.7339e-05	-0.71146	0.881	0.000805807	0.00725226	0.0362613	Inhibited
Malaria	05144	45	3	0.000275107	0	1	0.00253053	0.0163504	0.113874	Inhibited
Staphylococcus aureus infection	05150	48	3	0.000333345	2.27811	0.83	0.00254339	0.0163504	0.114453	Activated
Complement and coagulation cascades	04610	58	3	0.000583077	3.21547	0.747	0.0038063	0.0214104	0.171283	Activated
Transcriptional misregulation in cancer	05202	155	4	0.000941956	0	1	0.00750508	0.0364341	0.337729	Inhibited
NOD-like receptor signaling pathway	04621	54	2	0.010172	-4.58068	0.101	0.00809647	0.0364341	0.364341	Inhibited
Rheumatoid arthritis	05323	83	3	0.00165287	0	1	0.0122399	0.0500724	0.550797	Inhibited
African trypanosomiasis	05143	32	2	0.00366719	0	1	0.024234	0.0908776	1	Inhibited
Jak-STAT signaling pathway	04630	121	3	0.0048082	0	1	0.0304716	0.105479	1	Inhibited
Legionellosis	05134	53	2	0.00981276	0	1	0.0551877	0.177389	1	Inhibited
Amoebiasis	05146	98	2	0.0312447	-0.737462	0.351	0.060459	0.181377	1	Inhibited
Pertussis	05133	69	2	0.0162363	-1.89819	0.742	0.0652833	0.183609	1	Inhibited
Chagas disease (American trypanosomiasis)	05142	98	2	0.0312447	-1.55614	0.778	0.114661	0.303514	1	Inhibited
HTLV-I infection	05166	245	3	0.0317499	0.637467	0.849	0.124362	0.310904	1	Activated
Viral myocarditis	05416	61	1	0.158767	1.88678	0.236	0.160526	0.380194	1	Activated
Hepatitis C	05160	114	2	0.0411608	0	1	0.172475	0.388068	1	Inhibited
Gap junction	04540	76	1	0.193863	5.11904	0.278	0.211304	0.422363	1	Activated
Chemokine signaling pathway	04062	160	1	0.365485	4.68974	0.158	0.222422	0.422363	1	Activated
Tuberculosis	05152	162	2	0.0766022	-1.29183	0.757	0.223109	0.422363	1	Inhibited
Osteoclast differentiation	04380	127	1	0.302809	-1.25702	0.194	0.22526	0.422363	1	Inhibited
Natural killer cell mediated cytotoxicity	04650	107	1	0.261918	9.42251	0.297	0.276445	0.476119	1	Activated
Prion diseases	05020	30	1	0.0814355	0	1	0.285671	0.476119	1	Inhibited
Graft-versus-host disease	05332	30	1	0.0814355	0	1	0.285671	0.476119	1	Inhibited
Leukocyte transendothelial migration	04670	104	1	0.255586	3.77357	0.374	0.320003	0.489741	1	Activated
Intestinal immune network for IgA production	04672	37	1	0.0994831	0	1	0.329067	0.489741	1	Inhibited
Viral carcinogenesis	05203	189	2	0.0995609	0	1	0.329246	0.489741	1	Inhibited
Epstein-Barr virus infection	05169	193	2	0.103112	0	1	0.337377	0.489741	1	Inhibited
Prostate cancer	05215	86	1	0.216461	2.34137	0.511	0.354148	0.498021	1	Activated
Cytosolic DNA-sensing pathway	04623	49	1	0.129618	0	1	0.39445	0.536024	1	Inhibited
Melanoma	05218	60	1	0.156375	1.17141	0.876	0.409294	0.536024	1	Activated
Glioma	05214	65	1	0.168269	0.762598	0.837	0.416908	0.536024	1	Activated
Renal cell carcinoma	05211	65	1	0.168269	0	1	0.468157	0.584501	1	Inhibited
Leishmaniasis	05140	68	1	0.175327	0	1	0.480589	0.584501	1	Inhibited
Pathways in cancer	05200	296	2	0.203593	-0.221914	0.952	0.511846	0.603492	1	Inhibited
Salmonella infection	05132	79	1	0.200708	0	1	0.523026	0.603492	1	Inhibited
Toll-like receptor signaling pathway	04620	87	1	0.218686	0	1	0.551115	0.616654	1	Inhibited
MAPK signaling pathway	04010	234	1	0.486676	1.02381	0.464	0.561841	0.616654	1	Activated
Focal adhesion	04510	192	1	0.420985	1.91939	0.597	0.598411	0.638359	1	Activated
Systemic lupus erythematosus	05322	106	1	0.259813	0	1	0.609988	0.638359	1	Inhibited
Huntington's disease	05016	158	1	0.361849	0	1	0.729678	0.746262	1	Inhibited
Regulation of actin cytoskeleton	04810	190	1	0.41766	0	1	0.782314	0.782314	1	Inhibited

## Sheet: Reactome
ID	Description	setSize	enrichmentScore	NES	pvalue	p.adjust	qvalues
R-HSA-1280215	Cytokine Signaling in Immune system	15	0.515086	1.63626	0.0310945	0.0621891	0.0327311
R-HSA-168256	Immune System	22	0.423756	1.41452	0.0976801	0.0976801	0.0514106

## Sheet: GO
ontology	node_id	node_name	raw_p_overrep	FWER_overrep
biological_process	GO:0019221	cytokine-mediated signaling pathway	6.28427e-12	0
biological_process	GO:0098542	defense response to other organism	9.04449e-12	0
biological_process	GO:0006952	defense response	9.87467e-12	0
biological_process	GO:0009605	response to external stimulus	4.82493e-11	0
biological_process	GO:0051707	response to other organism	7.0754e-11	0
biological_process	GO:0043207	response to external biotic stimulus	7.24384e-11	0
biological_process	GO:0071345	cellular response to cytokine stimulus	8.87962e-11	0
biological_process	GO:0009607	response to biotic stimulus	1.03843e-10	0
biological_process	GO:0006955	immune response	1.94335e-10	0
biological_process	GO:0034097	response to cytokine	3.07893e-10	0
biological_process	GO:0045087	innate immune response	7.18664e-10	0
biological_process	GO:0051607	defense response to virus	2.36307e-09	0
biological_process	GO:0044419	interspecies interaction between organisms	3.1859e-09	0
biological_process	GO:0006950	response to stress	3.22894e-09	0
biological_process	GO:0002526	acute inflammatory response	4.06587e-09	0
biological_process	GO:0002252	immune effector process	5.6849e-09	0
biological_process	GO:0002376	immune system process	2.60212e-08	0
biological_process	GO:0009615	response to virus	3.35312e-08	0
biological_process	GO:0006954	inflammatory response	5.56058e-08	0
biological_process	GO:0060337	type I interferon signaling pathway	6.69437e-08	0
biological_process	GO:0071357	cellular response to type I interferon	6.69437e-08	0
biological_process	GO:0034340	response to type I interferon	8.57397e-08	0
cellular_component	GO:0005615	extracellular space	8.68251e-07	0
cellular_component	GO:0005576	extracellular region	9.24162e-07	0
biological_process	GO:0045069	regulation of viral genome replication	2.24812e-06	0
biological_process	GO:0007166	cell surface receptor signaling pathway	2.67664e-06	0
biological_process	GO:0050713	negative regulation of interleukin-1 beta secretion	2.98049e-06	0
biological_process	GO:0006953	acute-phase response	3.67795e-06	0
biological_process	GO:0060326	cell chemotaxis	4.68721e-06	0
biological_process	GO:0050711	negative regulation of interleukin-1 secretion	5.80855e-06	0.01
biological_process	GO:0050704	regulation of interleukin-1 secretion	5.97946e-06	0.01
biological_process	GO:0071222	cellular response to lipopolysaccharide	6.14591e-06	0.01
biological_process	GO:1902531	regulation of intracellular signal transduction	6.75912e-06	0.01
biological_process	GO:0032268	regulation of cellular protein metabolic process	6.7749e-06	0.01
biological_process	GO:0071219	cellular response to molecule of bacterial origin	7.44912e-06	0.01
biological_process	GO:0019079	viral genome replication	7.69182e-06	0.01
biological_process	GO:0045071	negative regulation of viral genome replication	9.2033e-06	0.01
biological_process	GO:0001775	cell activation	9.91155e-06	0.01
biological_process	GO:0030595	leukocyte chemotaxis	1.02002e-05	0.01
molecular_function	GO:0048018	receptor ligand activity	1.23853e-05	0.01
molecular_function	GO:0030546	signaling receptor activator activity	1.33466e-05	0.01
molecular_function	GO:0017159	pantetheine hydrolase activity	1.56892e-05	0.01
molecular_function	GO:0030545	receptor regulator activity	2.45446e-05	0.01
biological_process	GO:0050701	interleukin-1 secretion	1.05184e-05	0.02
biological_process	GO:0048585	negative regulation of response to stimulus	1.11204e-05	0.02
biological_process	GO:2001234	negative regulation of apoptotic signaling pathway	1.1856e-05	0.02
biological_process	GO:0071216	cellular response to biotic stimulus	1.37231e-05	0.02
biological_process	GO:0008219	cell death	1.57351e-05	0.02
biological_process	GO:0051246	regulation of protein metabolic process	1.62653e-05	0.02
biological_process	GO:0009617	response to bacterium	2.01873e-05	0.02
biological_process	GO:1903900	regulation of viral life cycle	2.02946e-05	0.02
biological_process	GO:0043410	positive regulation of MAPK cascade	2.49597e-05	0.02
biological_process	GO:0016477	cell migration	2.90644e-05	0.02
biological_process	GO:0012501	programmed cell death	3.44059e-05	0.03
molecular_function	GO:0042056	chemoattractant activity	9.20482e-05	0.03
biological_process	GO:1903901	negative regulation of viral life cycle	3.92479e-05	0.04
biological_process	GO:0070887	cellular response to chemical stimulus	4.13367e-05	0.04
biological_process	GO:0043408	regulation of MAPK cascade	4.22916e-05	0.04
biological_process	GO:0051248	negative regulation of protein metabolic process	4.36015e-05	0.04
biological_process	GO:0071310	cellular response to organic substance	4.62529e-05	0.04
biological_process	GO:0032691	negative regulation of interleukin-1 beta production	5.51051e-05	0.05
biological_process	GO:0050865	regulation of cell activation	5.74061e-05	0.05
biological_process	GO:1901564	organonitrogen compound metabolic process	6.1402e-05	0.05
biological_process	GO:0001932	regulation of protein phosphorylation	6.26115e-05	0.05
biological_process	GO:0080134	regulation of response to stress	6.34488e-05	0.05
biological_process	GO:0031401	positive regulation of protein modification process	6.54999e-05	0.05
biological_process	GO:0001934	positive regulation of protein phosphorylation	6.55832e-05	0.05
biological_process	GO:1902533	positive regulation of intracellular signal transduction	6.77814e-05	0.05
biological_process	GO:0060548	negative regulation of cell death	6.89039e-05	0.05
biological_process	GO:0002697	regulation of immune effector process	6.9208e-05	0.05
biological_process	GO:0032101	regulation of response to external stimulus	7.23675e-05	0.05
biological_process	GO:1900241	positive regulation of phenotypic switching	7.36845e-05	0.06
biological_process	GO:0048525	negative regulation of viral process	7.71095e-05	0.06
biological_process	GO:0048870	cell motility	7.86717e-05	0.06
biological_process	GO:0051674	localization of cell	7.86717e-05	0.06
biological_process	GO:0050866	negative regulation of cell activation	8.07773e-05	0.06
biological_process	GO:0032652	regulation of interleukin-1 production	8.32284e-05	0.07
biological_process	GO:0046677	response to antibiotic	8.5011e-05	0.07
biological_process	GO:0019058	viral life cycle	8.64515e-05	0.07
biological_process	GO:0032496	response to lipopolysaccharide	8.93908e-05	0.07
molecular_function	GO:0005125	cytokine activity	0.000147698	0.07
biological_process	GO:0032692	negative regulation of interleukin-1 production	9.14403e-05	0.08
biological_process	GO:0007596	blood coagulation	9.86906e-05	0.08
biological_process	GO:0042327	positive regulation of phosphorylation	9.8723e-05	0.08
biological_process	GO:0050792	regulation of viral process	9.95042e-05	0.08
biological_process	GO:0007159	leukocyte cell-cell adhesion	0.000100313	0.08
molecular_function	GO:0070851	growth factor receptor binding	0.000256177	0.11
biological_process	GO:0015939	pantothenate metabolic process	0.000103011	0.13
biological_process	GO:1903003	positive regulation of protein deubiquitination	0.000103011	0.13
biological_process	GO:0097529	myeloid leukocyte migration	0.000104085	0.13
biological_process	GO:0007599	hemostasis	0.000107016	0.13
biological_process	GO:0050817	coagulation	0.000108746	0.13
biological_process	GO:0002237	response to molecule of bacterial origin	0.000110499	0.13
biological_process	GO:0072676	lymphocyte migration	0.000111283	0.13
biological_process	GO:0050900	leukocyte migration	0.000111999	0.13
biological_process	GO:0032612	interleukin-1 production	0.000127626	0.14
biological_process	GO:0010646	regulation of cell communication	0.000131227	0.14
biological_process	GO:0043903	regulation of symbiosis, encompassing mutualism through parasitism	0.000135077	0.15
cellular_component	GO:0070062	extracellular exosome	0.000493373	0.17
biological_process	GO:0045861	negative regulation of proteolysis	0.000139599	0.18
biological_process	GO:0032269	negative regulation of cellular protein metabolic process	0.000139951	0.18
molecular_function	GO:0005126	cytokine receptor binding	0.000495558	0.18
biological_process	GO:0097191	extrinsic apoptotic signaling pathway	0.000140863	0.19
biological_process	GO:0010883	regulation of lipid storage	0.00015023	0.19
biological_process	GO:0050706	regulation of interleukin-1 beta secretion	0.00015023	0.19
biological_process	GO:0002366	leukocyte activation involved in immune response	0.000153121	0.19
biological_process	GO:0032270	positive regulation of cellular protein metabolic process	0.00015338	0.19
biological_process	GO:0023051	regulation of signaling	0.000153896	0.19
biological_process	GO:0043066	negative regulation of apoptotic process	0.000158136	0.19
biological_process	GO:0042325	regulation of phosphorylation	0.000158899	0.19
biological_process	GO:0002263	cell activation involved in immune response	0.000159172	0.19
biological_process	GO:0009636	response to toxic substance	0.000164529	0.19
biological_process	GO:0010562	positive regulation of phosphorus metabolic process	0.000166736	0.19
biological_process	GO:0045937	positive regulation of phosphate metabolic process	0.000166736	0.19
cellular_component	GO:1903561	extracellular vesicle	0.000546614	0.19
cellular_component	GO:0043230	extracellular organelle	0.000558818	0.19
biological_process	GO:0001817	regulation of cytokine production	0.00017187	0.21
biological_process	GO:0065008	regulation of biological quality	0.000172807	0.21
molecular_function	GO:0016811	hydrolase activity, acting on carbon-nitrogen (but not peptide) bonds, in linear amides	0.000641532	0.21
molecular_function	GO:0004866	endopeptidase inhibitor activity	0.000703395	0.22
molecular_function	GO:0030414	peptidase inhibitor activity	0.000814414	0.24
molecular_function	GO:0061135	endopeptidase regulator activity	0.000814414	0.24
biological_process	GO:0050727	regulation of inflammatory response	0.000177036	0.25
biological_process	GO:0043124	negative regulation of I-kappaB kinase/NF-kappaB signaling	0.00018148	0.25
biological_process	GO:0043069	negative regulation of programmed cell death	0.000186196	0.25
biological_process	GO:0030162	regulation of proteolysis	0.000188911	0.25
biological_process	GO:0030335	positive regulation of cell migration	0.000190907	0.25
molecular_function	GO:0005102	signaling receptor binding	0.000891174	0.25
biological_process	GO:0002687	positive regulation of leukocyte migration	0.000192823	0.26
biological_process	GO:0042592	homeostatic process	0.000198953	0.26
biological_process	GO:0097237	cellular response to toxic substance	0.00022201	0.29
biological_process	GO:0040011	locomotion	0.000227684	0.29
biological_process	GO:0000165	MAPK cascade	0.00022881	0.29
biological_process	GO:0030195	negative regulation of blood coagulation	0.000229313	0.29
biological_process	GO:0050702	interleukin-1 beta secretion	0.000229313	0.29
biological_process	GO:0010951	negative regulation of endopeptidase activity	0.000234774	0.29
biological_process	GO:0009967	positive regulation of signal transduction	0.000238428	0.29
biological_process	GO:0042060	wound healing	0.000240695	0.29
biological_process	GO:1900047	negative regulation of hemostasis	0.000242422	0.29
biological_process	GO:2000147	positive regulation of cell motility	0.000248594	0.29
biological_process	GO:0023014	signal transduction by protein phosphorylation	0.000249147	0.29
biological_process	GO:0032102	negative regulation of response to external stimulus	0.00025444	0.29
biological_process	GO:0022407	regulation of cell-cell adhesion	0.000261349	0.29
biological_process	GO:0009966	regulation of signal transduction	0.000266806	0.29
biological_process	GO:0044267	cellular protein metabolic process	0.000267123	0.29
cellular_component	GO:0034364	high-density lipoprotein particle	0.00146051	0.3
biological_process	GO:0051247	positive regulation of protein metabolic process	0.000273604	0.32
biological_process	GO:0035556	intracellular signal transduction	0.000274627	0.32
biological_process	GO:2001233	regulation of apoptotic signaling pathway	0.000275611	0.32
biological_process	GO:0050819	negative regulation of coagulation	0.000284635	0.32
biological_process	GO:0040017	positive regulation of locomotion	0.000291298	0.32
biological_process	GO:0010466	negative regulation of peptidase activity	0.000291511	0.32
biological_process	GO:0051272	positive regulation of cellular component movement	0.000297414	0.32
biological_process	GO:0002822	regulation of adaptive immune response based on somatic recombination of immune receptors built from immunoglobulin superfamily domains	0.000310618	0.33
molecular_function	GO:0061134	peptidase regulator activity	0.00161442	0.33
biological_process	GO:0090085	regulation of protein deubiquitination	0.000321446	0.36
biological_process	GO:0001816	cytokine production	0.000325835	0.36
biological_process	GO:0071236	cellular response to antibiotic	0.000327237	0.36
biological_process	GO:0061041	regulation of wound healing	0.000335781	0.36
biological_process	GO:1901342	regulation of vasculature development	0.000338913	0.36
biological_process	GO:0097190	apoptotic signaling pathway	0.000353698	0.36
biological_process	GO:0032675	regulation of interleukin-6 production	0.000371564	0.37
biological_process	GO:0045779	negative regulation of bone resorption	0.000379348	0.4
biological_process	GO:0090677	reversible differentiation	0.000379348	0.4
biological_process	GO:0030168	platelet activation	0.00038092	0.4
molecular_function	GO:0098772	molecular function regulator	0.00216354	0.4
biological_process	GO:0048247	lymphocyte chemotaxis	0.00040089	0.41
biological_process	GO:1905952	regulation of lipid localization	0.00041	0.41
biological_process	GO:0002548	monocyte chemotaxis	0.000419632	0.41
biological_process	GO:0072678	T cell migration	0.000419632	0.41
biological_process	GO:0072593	reactive oxygen species metabolic process	0.00042195	0.42
biological_process	GO:0032940	secretion by cell	0.000425592	0.42
biological_process	GO:0048583	regulation of response to stimulus	0.000433214	0.42
biological_process	GO:0045321	leukocyte activation	0.000441762	0.42
biological_process	GO:1900239	regulation of phenotypic switching	0.000441942	0.42
biological_process	GO:0002819	regulation of adaptive immune response	0.0004512	0.42
biological_process	GO:0032635	interleukin-6 production	0.000461945	0.42
biological_process	GO:0019220	regulation of phosphate metabolic process	0.00046251	0.42
biological_process	GO:0051240	positive regulation of multicellular organismal process	0.000464854	0.42
biological_process	GO:0019538	protein metabolic process	0.000466843	0.42
biological_process	GO:0051174	regulation of phosphorus metabolic process	0.000467207	0.42
biological_process	GO:0071356	cellular response to tumor necrosis factor	0.000471505	0.42
biological_process	GO:0019915	lipid storage	0.000479212	0.42
biological_process	GO:0050918	positive chemotaxis	0.000479212	0.42
biological_process	GO:0048519	negative regulation of biological process	0.000496594	0.42
biological_process	GO:0046851	negative regulation of bone remodeling	0.000509206	0.44
biological_process	GO:1900119	positive regulation of execution phase of apoptosis	0.000509206	0.44
biological_process	GO:0001818	negative regulation of cytokine production	0.000509507	0.44
biological_process	GO:0002684	positive regulation of immune system process	0.000510048	0.44
biological_process	GO:0010033	response to organic substance	0.000510635	0.44
biological_process	GO:0006935	chemotaxis	0.000530106	0.44
biological_process	GO:0042330	taxis	0.000539996	0.44
biological_process	GO:0140352	export from cell	0.000545116	0.44
biological_process	GO:0048660	regulation of smooth muscle cell proliferation	0.000554589	0.44
biological_process	GO:0034599	cellular response to oxidative stress	0.000558108	0.45
biological_process	GO:0002682	regulation of immune system process	0.00056604	0.45
biological_process	GO:1903037	regulation of leukocyte cell-cell adhesion	0.00057506	0.45
biological_process	GO:0048659	smooth muscle cell proliferation	0.000579672	0.45
biological_process	GO:0051171	regulation of nitrogen compound metabolic process	0.000580173	0.45
biological_process	GO:0006957	complement activation, alternative pathway	0.000581119	0.47
biological_process	GO:0044827	modulation by host of viral genome replication	0.000581119	0.47
biological_process	GO:0048584	positive regulation of response to stimulus	0.000604793	0.47
biological_process	GO:0031399	regulation of protein modification process	0.000613314	0.47
biological_process	GO:0050710	negative regulation of cytokine secretion	0.000614071	0.47
biological_process	GO:0051172	negative regulation of nitrogen compound metabolic process	0.000627972	0.47
biological_process	GO:0034612	response to tumor necrosis factor	0.000646775	0.48
biological_process	GO:0036166	phenotypic switching	0.000657663	0.51
biological_process	GO:0061045	negative regulation of wound healing	0.000663868	0.52
biological_process	GO:0071347	cellular response to interleukin-1	0.000688118	0.52
biological_process	GO:1903034	regulation of response to wounding	0.000688118	0.52
biological_process	GO:0071346	cellular response to interferon-gamma	0.000702616	0.53
biological_process	GO:0051249	regulation of lymphocyte activation	0.000706701	0.53
biological_process	GO:0002285	lymphocyte activation involved in immune response	0.000717329	0.53
biological_process	GO:0009611	response to wounding	0.000725652	0.53
biological_process	GO:0030193	regulation of blood coagulation	0.000743283	0.54
biological_process	GO:1900046	regulation of hemostasis	0.000771038	0.55
biological_process	GO:0010647	positive regulation of cell communication	0.000778197	0.55
biological_process	GO:0023056	positive regulation of signaling	0.000804031	0.55
biological_process	GO:0030155	regulation of cell adhesion	0.000804561	0.55
biological_process	GO:0002544	chronic inflammatory response	0.000824559	0.57
biological_process	GO:0010544	negative regulation of platelet activation	0.000824559	0.57
biological_process	GO:1902176	negative regulation of oxidative stress-induced intrinsic apoptotic signaling pathway	0.000824559	0.57
biological_process	GO:1905954	positive regulation of lipid localization	0.00082851	0.57
biological_process	GO:0006928	movement of cell or subcellular component	0.000828785	0.57
biological_process	GO:0050878	regulation of body fluid levels	0.000836949	0.57
biological_process	GO:0046903	secretion	0.000857475	0.57
biological_process	GO:0050818	regulation of coagulation	0.000888638	0.57
biological_process	GO:0050731	positive regulation of peptidyl-tyrosine phosphorylation	0.000893914	0.57
cellular_component	GO:0034358	plasma lipoprotein particle	0.00294776	0.57
cellular_component	GO:1990777	lipoprotein particle	0.00294776	0.57
cellular_component	GO:0032994	protein-lipid complex	0.00327067	0.58
cellular_component	GO:0072562	blood microparticle	0.00402832	0.59
biological_process	GO:0034104	negative regulation of tissue remodeling	0.000914871	0.62
biological_process	GO:0080090	regulation of primary metabolic process	0.000928908	0.62
biological_process	GO:0001776	leukocyte homeostasis	0.000951471	0.63
biological_process	GO:0002685	regulation of leukocyte migration	0.000965113	0.63
biological_process	GO:0048523	negative regulation of cellular process	0.000969171	0.63
biological_process	GO:0002438	acute inflammatory response to antigenic stimulus	0.00100973	0.67
biological_process	GO:1904035	regulation of epithelial cell apoptotic process	0.00101705	0.69
biological_process	GO:0034341	response to interferon-gamma	0.00102107	0.69
biological_process	GO:0006468	protein phosphorylation	0.00106153	0.69
biological_process	GO:0007165	signal transduction	0.00107751	0.69
biological_process	GO:0062197	cellular response to chemical stress	0.00108295	0.69
biological_process	GO:0006915	apoptotic process	0.00108541	0.69
biological_process	GO:0032651	regulation of interleukin-1 beta production	0.00108544	0.69
biological_process	GO:0071674	mononuclear cell migration	0.00108544	0.69
biological_process	GO:1903035	negative regulation of response to wounding	0.00108544	0.69
biological_process	GO:0010884	positive regulation of lipid storage	0.00110912	0.71
biological_process	GO:0060333	interferon-gamma-mediated signaling pathway	0.00112069	0.71
biological_process	GO:0046649	lymphocyte activation	0.00113599	0.71
biological_process	GO:0070555	response to interleukin-1	0.00118142	0.71
biological_process	GO:0010648	negative regulation of cell communication	0.00120885	0.71
biological_process	GO:0051239	regulation of multicellular organismal process	0.0012131	0.71
biological_process	GO:0023057	negative regulation of signaling	0.00123436	0.71
biological_process	GO:0002460	adaptive immune response based on somatic recombination of immune receptors built from immunoglobulin superfamily domains	0.00124252	0.71
biological_process	GO:0050707	regulation of cytokine secretion	0.00124586	0.71
biological_process	GO:1902532	negative regulation of intracellular signal transduction	0.00129228	0.72
biological_process	GO:0097327	response to antineoplastic agent	0.00130782	0.72
biological_process	GO:0031324	negative regulation of cellular metabolic process	0.00134513	0.72
biological_process	GO:2001243	negative regulation of intrinsic apoptotic signaling pathway	0.00138785	0.72
biological_process	GO:0023052	signaling	0.00141728	0.72
biological_process	GO:0051817	modulation of process of other organism involved in symbiotic interaction	0.00142899	0.72
biological_process	GO:1903039	positive regulation of leukocyte cell-cell adhesion	0.00142971	0.72
biological_process	GO:0006508	proteolysis	0.00150292	0.73
biological_process	GO:0007154	cell communication	0.00150653	0.73
biological_process	GO:0032611	interleukin-1 beta production	0.00151356	0.74
biological_process	GO:0031323	regulation of cellular metabolic process	0.0015285	0.74
biological_process	GO:0072539	T-helper 17 cell differentiation	0.00155158	0.75
biological_process	GO:2000379	positive regulation of reactive oxygen species metabolic process	0.00155699	0.75
biological_process	GO:0030855	epithelial cell differentiation	0.00156708	0.75
biological_process	GO:0002694	regulation of leukocyte activation	0.001639	0.75
biological_process	GO:0030593	neutrophil chemotaxis	0.0016462	0.75
biological_process	GO:2001237	negative regulation of extrinsic apoptotic signaling pathway	0.0016462	0.75
biological_process	GO:0001894	tissue homeostasis	0.00165833	0.75
biological_process	GO:1902175	regulation of oxidative stress-induced intrinsic apoptotic signaling pathway	0.00167333	0.78
biological_process	GO:0002286	T cell activation involved in immune response	0.00173855	0.78
biological_process	GO:1904018	positive regulation of vasculature development	0.00173989	0.78
biological_process	GO:0001944	vasculature development	0.00177429	0.78
biological_process	GO:1905063	regulation of vascular smooth muscle cell differentiation	0.00179948	0.78
biological_process	GO:0072358	cardiovascular system development	0.00189235	0.78
cellular_component	GO:0005766	primary lysosome	0.00467078	0.78
cellular_component	GO:0042582	azurophil granule	0.00467078	0.78
biological_process	GO:0010575	positive regulation of vascular endothelial growth factor production	0.00193002	0.79
biological_process	GO:0072538	T-helper 17 type immune response	0.00193002	0.79
biological_process	GO:0043122	regulation of I-kappaB kinase/NF-kappaB signaling	0.00194096	0.79
biological_process	GO:1904019	epithelial cell apoptotic process	0.00198344	0.79
biological_process	GO:0033002	muscle cell proliferation	0.00200125	0.79
biological_process	GO:0045785	positive regulation of cell adhesion	0.00201589	0.79
biological_process	GO:0050663	cytokine secretion	0.00203188	0.79
biological_process	GO:0070268	cornification	0.00203486	0.79
biological_process	GO:0044788	modulation by host of viral process	0.00206494	0.79
cellular_component	GO:0034774	secretory granule lumen	0.00516262	0.79
cellular_component	GO:0060205	cytoplasmic vesicle lumen	0.0053921	0.79
cellular_component	GO:0031983	vesicle lumen	0.00550937	0.79
biological_process	GO:0035821	modulation of process of other organism	0.0020871	0.8
biological_process	GO:0007267	cell-cell signaling	0.00214403	0.8
biological_process	GO:0002675	positive regulation of acute inflammatory response	0.00220421	0.8
biological_process	GO:0010543	regulation of platelet activation	0.00220421	0.8
biological_process	GO:2000406	positive regulation of T cell migration	0.00220421	0.8
biological_process	GO:0009968	negative regulation of signal transduction	0.00221023	0.8
cellular_component	GO:0005739	mitochondrion	0.00603303	0.81
cellular_component	GO:0005896	interleukin-6 receptor complex	0.00652865	0.92
molecular_function	GO:0005130	granulocyte colony-stimulating factor receptor binding	0.00231691	0.93
molecular_function	GO:0031714	C5a anaphylatoxin chemotactic receptor binding	0.00231691	0.93
molecular_function	GO:0031715	C5L2 anaphylatoxin chemotactic receptor binding	0.00231691	0.93
molecular_function	GO:0047127	thiomorpholine-carboxylate dehydrogenase activity	0.00231691	0.93
molecular_function	GO:0016810	hydrolase activity, acting on carbon-nitrogen (but not peptide) bonds	0.00288114	0.94
cellular_component	GO:0001533	cornified envelope	0.00885775	0.97
cellular_component	GO:0030141	secretory granule	0.00896417	0.97
cellular_component	GO:0031093	platelet alpha granule lumen	0.00938975	0.97
cellular_component	GO:0062023	collagen-containing extracellular matrix	0.0116098	0.97
biological_process	GO:0001315	age-dependent response to reactive oxygen species	0.0022496	0.99
biological_process	GO:0003068	regulation of systemic arterial blood pressure by acetylcholine	0.0022496	0.99
biological_process	GO:0003069	acetylcholine-mediated vasodilation involved in regulation of systemic arterial blood pressure	0.0022496	0.99
biological_process	GO:0003070	regulation of systemic arterial blood pressure by neurotransmitter	0.0022496	0.99
biological_process	GO:0010477	response to sulfur dioxide	0.0022496	0.99
biological_process	GO:0034147	regulation of toll-like receptor 5 signaling pathway	0.0022496	0.99
biological_process	GO:0034148	negative regulation of toll-like receptor 5 signaling pathway	0.0022496	0.99
biological_process	GO:0045380	positive regulation of interleukin-17 biosynthetic process	0.0022496	0.99
biological_process	GO:0070429	negative regulation of nucleotide-binding oligomerization domain containing 1 signaling pathway	0.0022496	0.99
biological_process	GO:0072255	metanephric glomerular mesangial cell development	0.0022496	0.99
biological_process	GO:0085032	modulation by symbiont of host I-kappaB kinase/NF-kappaB cascade	0.0022496	0.99
biological_process	GO:1905603	regulation of maintenance of permeability of blood-brain barrier	0.0022496	0.99
biological_process	GO:0071396	cellular response to lipid	0.00224997	0.99
biological_process	GO:0006464	cellular protein modification process	0.00231325	0.99
biological_process	GO:0036211	protein modification process	0.00231325	0.99
biological_process	GO:1990266	neutrophil migration	0.00236086	0.99
biological_process	GO:0098609	cell-cell adhesion	0.00244363	0.99
biological_process	GO:2000352	negative regulation of endothelial cell apoptotic process	0.00249572	0.99
biological_process	GO:0022409	positive regulation of cell-cell adhesion	0.00253111	0.99
biological_process	GO:0052548	regulation of endopeptidase activity	0.00253917	0.99
biological_process	GO:0050730	regulation of peptidyl-tyrosine phosphorylation	0.00256713	0.99
biological_process	GO:0010574	regulation of vascular endothelial growth factor production	0.00264794	0.99
biological_process	GO:0071621	granulocyte chemotaxis	0.00265592	0.99
biological_process	GO:0051090	regulation of DNA-binding transcription factor activity	0.00272471	0.99
biological_process	GO:0035690	cellular response to drug	0.002752	0.99
biological_process	GO:0032689	negative regulation of interferon-gamma production	0.00280442	0.99
biological_process	GO:0030154	cell differentiation	0.00289186	0.99
biological_process	GO:0010573	vascular endothelial growth factor production	0.00296517	0.99
biological_process	GO:0007249	I-kappaB kinase/NF-kappaB signaling	0.00306802	0.99
biological_process	GO:0050691	regulation of defense response to virus by host	0.00313015	0.99
biological_process	GO:2000403	positive regulation of lymphocyte migration	0.00313015	0.99
biological_process	GO:0002274	myeloid leukocyte activation	0.00316166	0.99
biological_process	GO:0045598	regulation of fat cell differentiation	0.00324245	0.99
biological_process	GO:0006979	response to oxidative stress	0.003278	0.99
biological_process	GO:0052547	regulation of peptidase activity	0.00330921	0.99
biological_process	GO:0050921	positive regulation of chemotaxis	0.00345421	0.99
biological_process	GO:0035886	vascular smooth muscle cell differentiation	0.00347275	0.99
biological_process	GO:1902042	negative regulation of extrinsic apoptotic signaling pathway via death domain receptors	0.00347275	0.99
biological_process	GO:0048869	cellular developmental process	0.0035807	0.99
biological_process	GO:0045124	regulation of bone resorption	0.00365033	0.99
biological_process	GO:0051346	negative regulation of hydrolase activity	0.00366685	0.99
biological_process	GO:0051094	positive regulation of developmental process	0.0037005	0.99
biological_process	GO:0042110	T cell activation	0.00370069	0.99
biological_process	GO:1900117	regulation of execution phase of apoptosis	0.00383207	0.99
biological_process	GO:0050896	response to stimulus	0.00384414	0.99
biological_process	GO:0060255	regulation of macromolecule metabolic process	0.00387894	0.99
biological_process	GO:0044092	negative regulation of molecular function	0.00389587	0.99
biological_process	GO:0050709	negative regulation of protein secretion	0.00390275	0.99
biological_process	GO:0097530	granulocyte migration	0.00390275	0.99
biological_process	GO:0097193	intrinsic apoptotic signaling pathway	0.00396341	0.99
biological_process	GO:0050708	regulation of protein secretion	0.00397958	0.99
biological_process	GO:0043412	macromolecule modification	0.00412818	0.99
biological_process	GO:0008631	intrinsic apoptotic signaling pathway in response to oxidative stress	0.00420797	0.99
biological_process	GO:0051250	negative regulation of lymphocyte activation	0.00430247	0.99
biological_process	GO:0010941	regulation of cell death	0.00435509	0.99
biological_process	GO:0065009	regulation of molecular function	0.00435535	0.99
biological_process	GO:2000404	regulation of T cell migration	0.00440209	0.99
biological_process	GO:0002792	negative regulation of peptide secretion	0.00446907	0.99
biological_process	GO:0048878	chemical homeostasis	0.00447845	0.99
biological_process	GO:0031347	regulation of defense response	0.00448059	0.99
cellular_component	GO:0031982	vesicle	0.0142043	0.99
biological_process	GO:0000294	nuclear-transcribed mRNA catabolic process, endonucleolytic cleavage-dependent decay	0.00449426	1
biological_process	GO:0001306	age-dependent response to oxidative stress	0.00449426	1
biological_process	GO:0001970	positive regulation of activation of membrane attack complex	0.00449426	1
biological_process	GO:0002384	hepatic immune response	0.00449426	1
biological_process	GO:0007571	age-dependent general metabolic decline	0.00449426	1
biological_process	GO:0010512	negative regulation of phosphatidylinositol biosynthetic process	0.00449426	1
biological_process	GO:0034146	toll-like receptor 5 signaling pathway	0.00449426	1
biological_process	GO:0044501	modulation of signal transduction in other organism	0.00449426	1
biological_process	GO:0052027	modulation by symbiont of host signal transduction pathway	0.00449426	1
biological_process	GO:0070428	regulation of nucleotide-binding oligomerization domain containing 1 signaling pathway	0.00449426	1
biological_process	GO:0071505	response to mycophenolic acid	0.00449426	1
biological_process	GO:0071506	cellular response to mycophenolic acid	0.00449426	1
biological_process	GO:0072209	metanephric mesangial cell differentiation	0.00449426	1
biological_process	GO:0072254	metanephric glomerular mesangial cell differentiation	0.00449426	1
biological_process	GO:0072573	tolerance induction to lipopolysaccharide	0.00449426	1
biological_process	GO:0090291	negative regulation of osteoclast proliferation	0.00449426	1
biological_process	GO:2000349	negative regulation of CD40 signaling pathway	0.00449426	1
biological_process	GO:2000627	positive regulation of miRNA catabolic process	0.00449426	1
biological_process	GO:2000857	positive regulation of mineralocorticoid secretion	0.00449426	1
biological_process	GO:2000860	positive regulation of aldosterone secretion	0.00449426	1
biological_process	GO:0070372	regulation of ERK1 and ERK2 cascade	0.00452453	1
biological_process	GO:0050777	negative regulation of immune response	0.00463955	1
biological_process	GO:1901701	cellular response to oxygen-containing compound	0.00464002	1
biological_process	GO:0023061	signal release	0.00480025	1
biological_process	GO:0002437	inflammatory response to antigenic stimulus	0.00480258	1
biological_process	GO:0002673	regulation of acute inflammatory response	0.00480258	1
biological_process	GO:0071354	cellular response to interleukin-6	0.00480258	1
biological_process	GO:1904036	negative regulation of epithelial cell apoptotic process	0.00480258	1
biological_process	GO:0050793	regulation of developmental process	0.00489169	1
biological_process	GO:0030334	regulation of cell migration	0.00489373	1
biological_process	GO:0050729	positive regulation of inflammatory response	0.00490259	1
biological_process	GO:0002446	neutrophil mediated immunity	0.00503284	1
biological_process	GO:0002791	regulation of peptide secretion	0.00507531	1
biological_process	GO:2001236	regulation of extrinsic apoptotic signaling pathway	0.00508287	1
biological_process	GO:0042221	response to chemical	0.00514255	1
biological_process	GO:0046850	regulation of bone remodeling	0.00521926	1
biological_process	GO:0051150	regulation of smooth muscle cell differentiation	0.00521926	1
biological_process	GO:0061014	positive regulation of mRNA catabolic process	0.00521926	1
biological_process	GO:0050863	regulation of T cell activation	0.00531342	1
biological_process	GO:0070371	ERK1 and ERK2 cascade	0.00549373	1
biological_process	GO:0051223	regulation of protein transport	0.00556273	1
biological_process	GO:0070741	response to interleukin-6	0.00565201	1
biological_process	GO:0016310	phosphorylation	0.00567846	1
biological_process	GO:0002521	leukocyte differentiation	0.00574346	1
biological_process	GO:0032103	positive regulation of response to external stimulus	0.0059317	1
biological_process	GO:2001242	regulation of intrinsic apoptotic signaling pathway	0.00604422	1
molecular_function	GO:0031593	polyubiquitin modification-dependent protein binding	0.00621502	1
molecular_function	GO:0008083	growth factor activity	0.00632845	1
biological_process	GO:0032715	negative regulation of interleukin-6 production	0.00633091	1
biological_process	GO:0098586	cellular response to virus	0.00633091	1
biological_process	GO:0001906	cell killing	0.0063524	1
biological_process	GO:0034614	cellular response to reactive oxygen species	0.0063524	1
biological_process	GO:0045619	regulation of lymphocyte differentiation	0.00645718	1
biological_process	GO:0050728	negative regulation of inflammatory response	0.00645718	1
biological_process	GO:0006807	nitrogen compound metabolic process	0.0064854	1
biological_process	GO:0050776	regulation of immune response	0.0065237	1
biological_process	GO:0070201	regulation of establishment of protein localization	0.0065338	1
biological_process	GO:1903530	regulation of secretion by cell	0.00661652	1
biological_process	GO:0001798	positive regulation of type IIa hypersensitivity	0.00673398	1
biological_process	GO:0001905	activation of membrane attack complex	0.00673398	1
biological_process	GO:0001969	regulation of activation of membrane attack complex	0.00673398	1
biological_process	GO:0002894	positive regulation of type II hypersensitivity	0.00673398	1
biological_process	GO:0034140	negative regulation of toll-like receptor 3 signaling pathway	0.00673398	1
biological_process	GO:0035633	maintenance of permeability of blood-brain barrier	0.00673398	1
biological_process	GO:0035793	positive regulation of metanephric mesenchymal cell migration by platelet-derived growth factor receptor-beta signaling pathway	0.00673398	1
biological_process	GO:0042235	interleukin-17 biosynthetic process	0.00673398	1
biological_process	GO:0045079	negative regulation of chemokine biosynthetic process	0.00673398	1
biological_process	GO:0045378	regulation of interleukin-17 biosynthetic process	0.00673398	1
biological_process	GO:0051714	positive regulation of cytolysis in other organism	0.00673398	1
biological_process	GO:0070425	negative regulation of nucleotide-binding oligomerization domain containing signaling pathway	0.00673398	1
biological_process	GO:0070433	negative regulation of nucleotide-binding oligomerization domain containing 2 signaling pathway	0.00673398	1
biological_process	GO:0070634	transepithelial ammonium transport	0.00673398	1
biological_process	GO:0098749	cerebellar neuron development	0.00673398	1
biological_process	GO:0099183	trans-synaptic signaling by BDNF, modulating synaptic transmission	0.00673398	1
biological_process	GO:0099191	trans-synaptic signaling by BDNF	0.00673398	1
biological_process	GO:0150064	vertebrate eye-specific patterning	0.00673398	1
biological_process	GO:1900238	regulation of metanephric mesenchymal cell migration by platelet-derived growth factor receptor-beta signaling pathway	0.00673398	1
biological_process	GO:1905176	positive regulation of vascular smooth muscle cell dedifferentiation	0.00673398	1
biological_process	GO:1905917	positive regulation of cell differentiation involved in phenotypic switching	0.00673398	1
biological_process	GO:1905932	positive regulation of vascular smooth muscle cell differentiation involved in phenotypic switching	0.00673398	1
biological_process	GO:2000591	positive regulation of metanephric mesenchymal cell migration	0.00673398	1
biological_process	GO:2000625	regulation of miRNA catabolic process	0.00673398	1
biological_process	GO:2000676	positive regulation of type B pancreatic cell apoptotic process	0.00673398	1
biological_process	GO:0001568	blood vessel development	0.00674204	1
biological_process	GO:0090087	regulation of peptide transport	0.00674204	1
biological_process	GO:0043030	regulation of macrophage activation	0.00680316	1
biological_process	GO:0045620	negative regulation of lymphocyte differentiation	0.00680316	1
biological_process	GO:2000145	regulation of cell motility	0.00687908	1
molecular_function	GO:0001730	2'-5'-oligoadenylate synthetase activity	0.00693502	1
biological_process	GO:0070936	protein K48-linked ubiquitination	0.00704513	1
biological_process	GO:1903202	negative regulation of oxidative stress-induced cell death	0.00704513	1
biological_process	GO:0002695	negative regulation of leukocyte activation	0.00710761	1
biological_process	GO:0051336	regulation of hydrolase activity	0.00714783	1
biological_process	GO:0051897	positive regulation of protein kinase B signaling	0.00721966	1
biological_process	GO:0048008	platelet-derived growth factor receptor signaling pathway	0.00729096	1
biological_process	GO:1900408	negative regulation of cellular response to oxidative stress	0.00729096	1
biological_process	GO:0051173	positive regulation of nitrogen compound metabolic process	0.00752281	1
biological_process	GO:0042093	T-helper cell differentiation	0.00754065	1
biological_process	GO:1902041	regulation of extrinsic apoptotic signaling pathway via death domain receptors	0.00754065	1
biological_process	GO:0045595	regulation of cell differentiation	0.00754373	1
biological_process	GO:0051049	regulation of transport	0.00754373	1
biological_process	GO:0002444	myeloid leukocyte mediated immunity	0.00765504	1
biological_process	GO:0042981	regulation of apoptotic process	0.00772065	1
biological_process	GO:0001836	release of cytochrome c from mitochondria	0.00779417	1
biological_process	GO:1902883	negative regulation of response to oxidative stress	0.00779417	1
biological_process	GO:2000351	regulation of endothelial cell apoptotic process	0.00779417	1
biological_process	GO:0051147	regulation of muscle cell differentiation	0.0077957	1
biological_process	GO:0032879	regulation of localization	0.00793342	1
biological_process	GO:0030098	lymphocyte differentiation	0.00798616	1
biological_process	GO:0002294	CD4-positive, alpha-beta T cell differentiation involved in immune response	0.00805151	1
biological_process	GO:0018149	peptide cross-linking	0.00805151	1
biological_process	GO:0051851	modulation by host of symbiont process	0.00805151	1
biological_process	GO:0051241	negative regulation of multicellular organismal process	0.00818044	1
biological_process	GO:0006959	humoral immune response	0.00822243	1
biological_process	GO:0010035	response to inorganic substance	0.00823999	1
biological_process	GO:0044260	cellular macromolecule metabolic process	0.00827125	1
biological_process	GO:0002287	alpha-beta T cell activation involved in immune response	0.00831265	1
biological_process	GO:0002293	alpha-beta T cell differentiation involved in immune response	0.00831265	1
biological_process	GO:0009913	epidermal cell differentiation	0.00838248	1
biological_process	GO:0040012	regulation of locomotion	0.00853265	1
biological_process	GO:0002260	lymphocyte homeostasis	0.00857757	1
biological_process	GO:0045453	bone resorption	0.00857757	1
biological_process	GO:0043067	regulation of programmed cell death	0.00859497	1
biological_process	GO:0006575	cellular modified amino acid metabolic process	0.00864677	1
biological_process	GO:0031331	positive regulation of cellular catabolic process	0.00870872	1
biological_process	GO:0018108	peptidyl-tyrosine phosphorylation	0.00879157	1
biological_process	GO:2000401	regulation of lymphocyte migration	0.00884626	1
biological_process	GO:0001794	type IIa hypersensitivity	0.00896879	1
biological_process	GO:0001796	regulation of type IIa hypersensitivity	0.00896879	1
biological_process	GO:0001922	B-1 B cell homeostasis	0.00896879	1
biological_process	GO:0002445	type II hypersensitivity	0.00896879	1
biological_process	GO:0002677	negative regulation of chronic inflammatory response	0.00896879	1
biological_process	GO:0002892	regulation of type II hypersensitivity	0.00896879	1
biological_process	GO:0003104	positive regulation of glomerular filtration	0.00896879	1
biological_process	GO:0032824	negative regulation of natural killer cell differentiation	0.00896879	1
biological_process	GO:0032827	negative regulation of natural killer cell differentiation involved in immune response	0.00896879	1
biological_process	GO:0035788	cell migration involved in metanephros development	0.00896879	1
biological_process	GO:0035789	metanephric mesenchymal cell migration	0.00896879	1
biological_process	GO:0036146	cellular response to mycotoxin	0.00896879	1
biological_process	GO:0051710	regulation of cytolysis in other organism	0.00896879	1
biological_process	GO:0070427	nucleotide-binding oligomerization domain containing 1 signaling pathway	0.00896879	1
biological_process	GO:0150062	complement-mediated synapse pruning	0.00896879	1
biological_process	GO:1900127	positive regulation of hyaluronan biosynthetic process	0.00896879	1
biological_process	GO:1904636	response to ionomycin	0.00896879	1
biological_process	GO:1904637	cellular response to ionomycin	0.00896879	1
biological_process	GO:1990168	protein K33-linked deubiquitination	0.00896879	1
biological_process	GO:2000589	regulation of metanephric mesenchymal cell migration	0.00896879	1
biological_process	GO:0018212	peptidyl-tyrosine modification	0.00904321	1
biological_process	GO:0051046	regulation of secretion	0.0091002	1
biological_process	GO:0043086	negative regulation of catalytic activity	0.00920546	1
molecular_function	GO:0004784	superoxide dismutase activity	0.00923625	1
molecular_function	GO:0008745	N-acetylmuramoyl-L-alanine amidase activity	0.00923625	1
molecular_function	GO:0016721	oxidoreductase activity, acting on superoxide radicals as acceptor	0.00923625	1
biological_process	GO:0051224	negative regulation of protein transport	0.00928691	1
biological_process	GO:0072577	endothelial cell apoptotic process	0.00939485	1
biological_process	GO:2000377	regulation of reactive oxygen species metabolic process	0.00955054	1
biological_process	GO:0045428	regulation of nitric oxide biosynthetic process	0.00967472	1
biological_process	GO:0002221	pattern recognition receptor signaling pathway	0.00981854	1
biological_process	GO:1904950	negative regulation of establishment of protein localization	0.00981854	1
biological_process	GO:0001525	angiogenesis	0.00983793	1
biological_process	GO:0048662	negative regulation of smooth muscle cell proliferation	0.00995829	1
biological_process	GO:0009306	protein secretion	0.0101122	1
biological_process	GO:0035592	establishment of protein localization to extracellular region	0.0101815	1
biological_process	GO:0016032	viral process	0.0101928	1
biological_process	GO:0002292	T cell differentiation involved in immune response	0.0102455	1
biological_process	GO:0051179	localization	0.0103995	1
biological_process	GO:0050870	positive regulation of T cell activation	0.0105077	1
biological_process	GO:0051270	regulation of cellular component movement	0.0105154	1
molecular_function	GO:0005518	collagen binding	0.010529	1
biological_process	GO:0045765	regulation of angiogenesis	0.0105587	1
biological_process	GO:0071692	protein localization to extracellular region	0.0106764	1
biological_process	GO:0010605	negative regulation of macromolecule metabolic process	0.0108294	1
biological_process	GO:0032720	negative regulation of tumor necrosis factor production	0.010831	1
molecular_function	GO:0004857	enzyme inhibitor activity	0.0108358	1
biological_process	GO:0051716	cellular response to stimulus	0.0109087	1
biological_process	GO:0002703	regulation of leukocyte mediated immunity	0.0109344	1
biological_process	GO:0002325	natural killer cell differentiation involved in immune response	0.0111987	1
biological_process	GO:0002457	T cell antigen processing and presentation	0.0111987	1
biological_process	GO:0003373	dynamin family protein polymerization involved in membrane fission	0.0111987	1
biological_process	GO:0003374	dynamin family protein polymerization involved in mitochondrial fission	0.0111987	1
biological_process	GO:0022614	membrane to membrane docking	0.0111987	1
biological_process	GO:0032826	regulation of natural killer cell differentiation involved in immune response	0.0111987	1
biological_process	GO:0034136	negative regulation of toll-like receptor 2 signaling pathway	0.0111987	1
biological_process	GO:0035523	protein K29-linked deubiquitination	0.0111987	1
biological_process	GO:0035787	cell migration involved in kidney development	0.0111987	1
biological_process	GO:0046813	receptor-mediated virion attachment to host cell	0.0111987	1
biological_process	GO:0071362	cellular response to ether	0.0111987	1
biological_process	GO:0072144	glomerular mesangial cell development	0.0111987	1
biological_process	GO:0072223	metanephric glomerular mesangium development	0.0111987	1
biological_process	GO:0090289	regulation of osteoclast proliferation	0.0111987	1
biological_process	GO:0090679	cell differentiation involved in phenotypic switching	0.0111987	1
biological_process	GO:0097368	establishment of Sertoli cell barrier	0.0111987	1
biological_process	GO:1902512	positive regulation of apoptotic DNA fragmentation	0.0111987	1
biological_process	GO:1902714	negative regulation of interferon-gamma secretion	0.0111987	1
biological_process	GO:1903936	cellular response to sodium arsenite	0.0111987	1
biological_process	GO:1905420	vascular smooth muscle cell differentiation involved in phenotypic switching	0.0111987	1
biological_process	GO:1905915	regulation of cell differentiation involved in phenotypic switching	0.0111987	1
biological_process	GO:1905930	regulation of vascular smooth muscle cell differentiation involved in phenotypic switching	0.0111987	1
biological_process	GO:2000630	positive regulation of miRNA metabolic process	0.0111987	1
biological_process	GO:2000660	negative regulation of interleukin-1-mediated signaling pathway	0.0111987	1
biological_process	GO:0031325	positive regulation of cellular metabolic process	0.0112042	1
biological_process	GO:0019222	regulation of metabolic process	0.0113337	1
biological_process	GO:0038034	signal transduction in absence of ligand	0.0114309	1
biological_process	GO:0097192	extrinsic apoptotic signaling pathway in absence of ligand	0.0114309	1
biological_process	GO:1903556	negative regulation of tumor necrosis factor superfamily cytokine production	0.0114309	1
molecular_function	GO:0016019	peptidoglycan immune receptor activity	0.0115323	1
biological_process	GO:0050688	regulation of defense response to virus	0.0117363	1
biological_process	GO:0050790	regulation of catalytic activity	0.01177	1
biological_process	GO:1903531	negative regulation of secretion by cell	0.0119688	1
biological_process	GO:0043367	CD4-positive, alpha-beta T cell differentiation	0.0120453	1
biological_process	GO:0051145	smooth muscle cell differentiation	0.0120453	1
biological_process	GO:1903201	regulation of oxidative stress-induced cell death	0.0123578	1
biological_process	GO:0070374	positive regulation of ERK1 and ERK2 cascade	0.0124288	1
biological_process	GO:0010604	positive regulation of macromolecule metabolic process	0.0124552	1
biological_process	GO:0007155	cell adhesion	0.0125558	1
biological_process	GO:0002790	peptide secretion	0.0125792	1
biological_process	GO:0050920	regulation of chemotaxis	0.0127411	1
biological_process	GO:0022610	biological adhesion	0.0129097	1
biological_process	GO:0002443	leukocyte mediated immunity	0.012991	1
biological_process	GO:0006809	nitric oxide biosynthetic process	0.0129934	1
biological_process	GO:0051702	interaction with symbiont	0.0129934	1
biological_process	GO:0044403	symbiotic process	0.0130588	1
biological_process	GO:1903313	positive regulation of mRNA metabolic process	0.0133165	1
biological_process	GO:0000270	peptidoglycan metabolic process	0.0134237	1
biological_process	GO:0002885	positive regulation of hypersensitivity	0.0134237	1
biological_process	GO:0009253	peptidoglycan catabolic process	0.0134237	1
biological_process	GO:0035931	mineralocorticoid secretion	0.0134237	1
biological_process	GO:0035932	aldosterone secretion	0.0134237	1
biological_process	GO:0045917	positive regulation of complement activation	0.0134237	1
biological_process	GO:0051902	negative regulation of mitochondrial depolarization	0.0134237	1
biological_process	GO:0070432	regulation of nucleotide-binding oligomerization domain containing 2 signaling pathway	0.0134237	1
biological_process	GO:0071072	negative regulation of phospholipid biosynthetic process	0.0134237	1
biological_process	GO:0072008	glomerular mesangial cell differentiation	0.0134237	1
biological_process	GO:0072126	positive regulation of glomerular mesangial cell proliferation	0.0134237	1
biological_process	GO:0072143	mesangial cell development	0.0134237	1
biological_process	GO:0072679	thymocyte migration	0.0134237	1
biological_process	GO:0090678	cell dedifferentiation involved in phenotypic switching	0.0134237	1
biological_process	GO:1903626	positive regulation of DNA catabolic process	0.0134237	1
biological_process	GO:1903935	response to sodium arsenite	0.0134237	1
biological_process	GO:1905174	regulation of vascular smooth muscle cell dedifferentiation	0.0134237	1
biological_process	GO:1990936	vascular smooth muscle cell dedifferentiation	0.0134237	1
biological_process	GO:2000348	regulation of CD40 signaling pathway	0.0134237	1
biological_process	GO:2000855	regulation of mineralocorticoid secretion	0.0134237	1
biological_process	GO:2000858	regulation of aldosterone secretion	0.0134237	1
biological_process	GO:0045444	fat cell differentiation	0.013705	1
molecular_function	GO:0031731	CCR6 chemokine receptor binding	0.0138231	1
biological_process	GO:0010876	lipid localization	0.0138408	1
biological_process	GO:0031424	keratinization	0.0138696	1
biological_process	GO:0072359	circulatory system development	0.0145679	1
biological_process	GO:0046209	nitric oxide metabolic process	0.0146436	1
biological_process	GO:0006887	exocytosis	0.0149104	1
biological_process	GO:0009896	positive regulation of catabolic process	0.014986	1
biological_process	GO:1903320	regulation of protein modification by small protein conjugation or removal	0.0150536	1
cellular_component	GO:0042406	extrinsic component of endoplasmic reticulum membrane	0.0151688	1
biological_process	GO:0000302	response to reactive oxygen species	0.0152273	1
biological_process	GO:0043154	negative regulation of cysteine-type endopeptidase activity involved in apoptotic process	0.0153278	1
molecular_function	GO:0042802	identical protein binding	0.0156086	1
biological_process	GO:0010046	response to mycotoxin	0.0156438	1
biological_process	GO:0032364	oxygen homeostasis	0.0156438	1
biological_process	GO:0038001	paracrine signaling	0.0156438	1
biological_process	GO:0071947	protein deubiquitination involved in ubiquitin-dependent protein catabolic process	0.0156438	1
biological_process	GO:0072007	mesangial cell differentiation	0.0156438	1
biological_process	GO:1902075	cellular response to salt	0.0156438	1
biological_process	GO:1904180	negative regulation of membrane depolarization	0.0156438	1
biological_process	GO:2000553	positive regulation of T-helper 2 cell cytokine production	0.0156438	1
biological_process	GO:2000659	regulation of interleukin-1-mediated signaling pathway	0.0156438	1
biological_process	GO:1904705	regulation of vascular smooth muscle cell proliferation	0.0156749	1
biological_process	GO:1990874	vascular smooth muscle cell proliferation	0.0156749	1
biological_process	GO:2001057	reactive nitrogen species metabolic process	0.0156749	1
biological_process	GO:0008625	extrinsic apoptotic signaling pathway via death domain receptors	0.0160255	1
molecular_function	GO:0005138	interleukin-6 receptor binding	0.0161088	1
molecular_function	GO:0008519	ammonium transmembrane transporter activity	0.0161088	1
molecular_function	GO:0070324	thyroid hormone binding	0.0161088	1
biological_process	GO:0051048	negative regulation of secretion	0.0162933	1
biological_process	GO:0033993	response to lipid	0.0162958	1
biological_process	GO:0002690	positive regulation of leukocyte chemotaxis	0.0163794	1
biological_process	GO:0014068	positive regulation of phosphatidylinositol 3-kinase signaling	0.0163794	1
biological_process	GO:0060249	anatomical structure homeostasis	0.0164378	1
biological_process	GO:0031348	negative regulation of defense response	0.016475	1
biological_process	GO:0030217	T cell differentiation	0.0166578	1
biological_process	GO:0006767	water-soluble vitamin metabolic process	0.0167367	1
biological_process	GO:0032088	negative regulation of NF-kappaB transcription factor activity	0.0167367	1
biological_process	GO:0034103	regulation of tissue remodeling	0.0167367	1
biological_process	GO:0097194	execution phase of apoptosis	0.0167367	1
biological_process	GO:1900407	regulation of cellular response to oxidative stress	0.0167367	1
cellular_component	GO:0031091	platelet alpha granule	0.0168272	1
cellular_component	GO:0035578	azurophil granule lumen	0.0168272	1
biological_process	GO:0002250	adaptive immune response	0.0173542	1
biological_process	GO:0051896	regulation of protein kinase B signaling	0.0174006	1
biological_process	GO:0046849	bone remodeling	0.0174612	1
biological_process	GO:0048514	blood vessel morphogenesis	0.0177575	1
biological_process	GO:0048872	homeostasis of number of cells	0.0177789	1
biological_process	GO:0014909	smooth muscle cell migration	0.0178284	1
biological_process	GO:0001781	neutrophil apoptotic process	0.017859	1
biological_process	GO:0002866	positive regulation of acute inflammatory response to antigenic stimulus	0.017859	1
biological_process	GO:0002883	regulation of hypersensitivity	0.017859	1
biological_process	GO:0010511	regulation of phosphatidylinositol biosynthetic process	0.017859	1
biological_process	GO:0023035	CD40 signaling pathway	0.017859	1
biological_process	GO:0035655	interleukin-18-mediated signaling pathway	0.017859	1
biological_process	GO:0044828	negative regulation by host of viral genome replication	0.017859	1
biological_process	GO:0051601	exocyst localization	0.017859	1
biological_process	GO:0051715	cytolysis in other organism	0.017859	1
biological_process	GO:0055118	negative regulation of cardiac muscle contraction	0.017859	1
biological_process	GO:0061043	regulation of vascular wound healing	0.017859	1
biological_process	GO:0061888	regulation of astrocyte activation	0.017859	1
biological_process	GO:0070327	thyroid hormone transport	0.017859	1
biological_process	GO:0071351	cellular response to interleukin-18	0.017859	1
biological_process	GO:0072239	metanephric glomerulus vasculature development	0.017859	1
biological_process	GO:0090091	positive regulation of extracellular matrix disassembly	0.017859	1
biological_process	GO:1900125	regulation of hyaluronan biosynthetic process	0.017859	1
biological_process	GO:1901724	positive regulation of cell proliferation involved in kidney development	0.017859	1
biological_process	GO:1904238	pericyte cell differentiation	0.017859	1
biological_process	GO:2000347	positive regulation of hepatocyte proliferation	0.017859	1
biological_process	GO:2000427	positive regulation of apoptotic cell clearance	0.017859	1
biological_process	GO:2000848	positive regulation of corticosteroid hormone secretion	0.017859	1
biological_process	GO:0035710	CD4-positive, alpha-beta T cell activation	0.0181989	1
biological_process	GO:2000117	negative regulation of cysteine-type endopeptidase activity	0.0181989	1
biological_process	GO:0003073	regulation of systemic arterial blood pressure	0.0185726	1
biological_process	GO:0036473	cell death in response to oxidative stress	0.0185726	1
biological_process	GO:2000026	regulation of multicellular organismal development	0.0189606	1
cellular_component	GO:0099503	secretory vesicle	0.0193113	1
biological_process	GO:0042116	macrophage activation	0.0193298	1
biological_process	GO:0009892	negative regulation of metabolic process	0.0193722	1
biological_process	GO:0010660	regulation of muscle cell apoptotic process	0.0197133	1
biological_process	GO:0032755	positive regulation of interleukin-6 production	0.0197133	1
molecular_function	GO:0004867	serine-type endopeptidase inhibitor activity	0.0200138	1
biological_process	GO:0001819	positive regulation of cytokine production	0.0200215	1
biological_process	GO:0008544	epidermis development	0.0200215	1
biological_process	GO:0002158	osteoclast proliferation	0.0200694	1
biological_process	GO:0002524	hypersensitivity	0.0200694	1
biological_process	GO:0002634	regulation of germinal center formation	0.0200694	1
biological_process	GO:0002676	regulation of chronic inflammatory response	0.0200694	1
biological_process	GO:0015696	ammonium transport	0.0200694	1
biological_process	GO:0032815	negative regulation of natural killer cell activation	0.0200694	1
biological_process	GO:0034139	regulation of toll-like receptor 3 signaling pathway	0.0200694	1
biological_process	GO:0034144	negative regulation of toll-like receptor 4 signaling pathway	0.0200694	1
biological_process	GO:0060700	regulation of ribonuclease activity	0.0200694	1
biological_process	GO:0070424	regulation of nucleotide-binding oligomerization domain containing signaling pathway	0.0200694	1
biological_process	GO:0072488	ammonium transmembrane transport	0.0200694	1
biological_process	GO:2000320	negative regulation of T-helper 17 cell differentiation	0.0200694	1
biological_process	GO:2000674	regulation of type B pancreatic cell apoptotic process	0.0200694	1
biological_process	GO:1902882	regulation of response to oxidative stress	0.0200999	1
biological_process	GO:1990868	response to chemokine	0.0200999	1
biological_process	GO:1990869	cellular response to chemokine	0.0200999	1
biological_process	GO:0031341	regulation of cell killing	0.0204898	1
biological_process	GO:0051091	positive regulation of DNA-binding transcription factor activity	0.0207629	1
biological_process	GO:0030838	positive regulation of actin filament polymerization	0.0208828	1
biological_process	GO:0070301	cellular response to hydrogen peroxide	0.0208828	1
biological_process	GO:0048513	animal organ development	0.0212444	1
biological_process	GO:0002824	positive regulation of adaptive immune response based on somatic recombination of immune receptors built from immunoglobulin superfamily domains	0.0212789	1
biological_process	GO:0010657	muscle cell apoptotic process	0.0212789	1
biological_process	GO:0051050	positive regulation of transport	0.0215622	1
biological_process	GO:1903706	regulation of hemopoiesis	0.0216102	1
biological_process	GO:0032649	regulation of interferon-gamma production	0.0216782	1
biological_process	GO:0046632	alpha-beta T cell differentiation	0.0216782	1
biological_process	GO:0048661	positive regulation of smooth muscle cell proliferation	0.0216782	1
biological_process	GO:0050830	defense response to Gram-positive bacterium	0.0216782	1
biological_process	GO:1903426	regulation of reactive oxygen species biosynthetic process	0.0216782	1
biological_process	GO:0002520	immune system development	0.0219502	1
biological_process	GO:0000079	regulation of cyclin-dependent protein serine/threonine kinase activity	0.0220807	1
biological_process	GO:0002291	T cell activation via T cell receptor contact with antigen bound to MHC molecule on antigen presenting cell	0.0222749	1
biological_process	GO:0010587	miRNA catabolic process	0.0222749	1
biological_process	GO:0019062	virion attachment to host cell	0.0222749	1
biological_process	GO:0033483	gas homeostasis	0.0222749	1
biological_process	GO:0034135	regulation of toll-like receptor 2 signaling pathway	0.0222749	1
biological_process	GO:0035871	protein K11-linked deubiquitination	0.0222749	1
biological_process	GO:0045988	negative regulation of striated muscle contraction	0.0222749	1
biological_process	GO:0070091	glucagon secretion	0.0222749	1
biological_process	GO:0072124	regulation of glomerular mesangial cell proliferation	0.0222749	1
biological_process	GO:0090557	establishment of endothelial intestinal barrier	0.0222749	1
biological_process	GO:0097050	type B pancreatic cell apoptotic process	0.0222749	1
biological_process	GO:0097278	complement-dependent cytotoxicity	0.0222749	1
biological_process	GO:1903799	negative regulation of production of miRNAs involved in gene silencing by miRNA	0.0222749	1
biological_process	GO:2000317	negative regulation of T-helper 17 type immune response	0.0222749	1
biological_process	GO:2000425	regulation of apoptotic cell clearance	0.0222749	1
biological_process	GO:2000628	regulation of miRNA metabolic process	0.0222749	1
biological_process	GO:2000833	positive regulation of steroid hormone secretion	0.0222749	1
biological_process	GO:0043491	protein kinase B signaling	0.0224606	1
biological_process	GO:1902106	negative regulation of leukocyte differentiation	0.0224862	1
biological_process	GO:0045597	positive regulation of cell differentiation	0.0225412	1
biological_process	GO:0014812	muscle cell migration	0.0228948	1
biological_process	GO:0046822	regulation of nucleocytoplasmic transport	0.0228948	1
molecular_function	GO:0004322	ferroxidase activity	0.0229348	1
molecular_function	GO:0016176	superoxide-generating NADPH oxidase activator activity	0.0229348	1
molecular_function	GO:0016724	oxidoreductase activity, oxidizing metal ions, oxygen as acceptor	0.0229348	1
molecular_function	GO:0051400	BH domain binding	0.0229348	1
biological_process	GO:1902105	regulation of leukocyte differentiation	0.0231164	1
biological_process	GO:0043312	neutrophil degranulation	0.0231204	1
biological_process	GO:0048871	multicellular organismal homeostasis	0.0231204	1
biological_process	GO:0002708	positive regulation of lymphocyte mediated immunity	0.0233065	1
biological_process	GO:0002821	positive regulation of adaptive immune response	0.0233065	1
biological_process	GO:0033138	positive regulation of peptidyl-serine phosphorylation	0.0233065	1
biological_process	GO:0002283	neutrophil activation involved in immune response	0.0235858	1
biological_process	GO:0002456	T cell mediated immunity	0.0237213	1
biological_process	GO:0042136	neurotransmitter biosynthetic process	0.0237213	1
biological_process	GO:1904029	regulation of cyclin-dependent protein kinase activity	0.0237213	1
biological_process	GO:0060429	epithelium development	0.0238472	1
biological_process	GO:0009893	positive regulation of metabolic process	0.0241522	1
biological_process	GO:0001976	nervous system process involved in regulation of systemic arterial blood pressure	0.0244756	1
biological_process	GO:0003093	regulation of glomerular filtration	0.0244756	1
biological_process	GO:0032494	response to peptidoglycan	0.0244756	1
biological_process	GO:0033089	positive regulation of T cell differentiation in thymus	0.0244756	1
biological_process	GO:0045919	positive regulation of cytolysis	0.0244756	1
biological_process	GO:0051024	positive regulation of immunoglobulin secretion	0.0244756	1
biological_process	GO:0070213	protein auto-ADP-ribosylation	0.0244756	1
biological_process	GO:0070673	response to interleukin-18	0.0244756	1
biological_process	GO:0072110	glomerular mesangial cell proliferation	0.0244756	1
biological_process	GO:0072683	T cell extravasation	0.0244756	1
biological_process	GO:0090193	positive regulation of glomerulus development	0.0244756	1
biological_process	GO:0098883	synapse pruning	0.0244756	1
biological_process	GO:1904468	negative regulation of tumor necrosis factor secretion	0.0244756	1
biological_process	GO:2000551	regulation of T-helper 2 cell cytokine production	0.0244756	1
biological_process	GO:0006796	phosphate-containing compound metabolic process	0.0248022	1
biological_process	GO:0051149	positive regulation of muscle cell differentiation	0.0249838	1
molecular_function	GO:0004843	thiol-dependent ubiquitin-specific protease activity	0.0250415	1
biological_process	GO:0042119	neutrophil activation	0.0251786	1
molecular_function	GO:0048407	platelet-derived growth factor binding	0.0251998	1
biological_process	GO:0016579	protein deubiquitination	0.0256101	1
biological_process	GO:0051258	protein polymerization	0.0256101	1
biological_process	GO:0043170	macromolecule metabolic process	0.0258871	1
biological_process	GO:0032880	regulation of protein localization	0.025987	1
biological_process	GO:0036230	granulocyte activation	0.026165	1
biological_process	GO:0006793	phosphorus metabolic process	0.0263886	1
biological_process	GO:0002863	positive regulation of inflammatory response to antigenic stimulus	0.0266714	1
biological_process	GO:0006554	lysine catabolic process	0.0266714	1
biological_process	GO:0016045	detection of bacterium	0.0266714	1
biological_process	GO:0043696	dedifferentiation	0.0266714	1
biological_process	GO:0043697	cell dedifferentiation	0.0266714	1
biological_process	GO:0044650	adhesion of symbiont to host cell	0.0266714	1
biological_process	GO:0045472	response to ether	0.0266714	1
biological_process	GO:0072540	T-helper 17 cell lineage commitment	0.0266714	1
biological_process	GO:0090148	membrane fission	0.0266714	1
biological_process	GO:0090331	negative regulation of platelet aggregation	0.0266714	1
biological_process	GO:0099550	trans-synaptic signaling, modulating synaptic transmission	0.0266714	1
biological_process	GO:1900165	negative regulation of interleukin-6 secretion	0.0266714	1
biological_process	GO:1902510	regulation of apoptotic DNA fragmentation	0.0266714	1
biological_process	GO:1905461	positive regulation of vascular associated smooth muscle cell apoptotic process	0.0266714	1
biological_process	GO:0032609	interferon-gamma production	0.0267092	1
molecular_function	GO:0001664	G protein-coupled receptor binding	0.0268469	1
biological_process	GO:0002688	regulation of leukocyte chemotaxis	0.0271479	1
cellular_component	GO:0031012	extracellular matrix	0.0272149	1
molecular_function	GO:0038187	pattern recognition receptor activity	0.0274598	1
molecular_function	GO:0061578	Lys63-specific deubiquitinase activity	0.0274598	1
biological_process	GO:0030449	regulation of complement activation	0.0275896	1
biological_process	GO:1901222	regulation of NIK/NF-kappaB signaling	0.0284816	1
molecular_function	GO:0036459	thiol-dependent ubiquitinyl hydrolase activity	0.0286497	1
molecular_function	GO:0101005	ubiquitinyl hydrolase activity	0.0286497	1
biological_process	GO:0002864	regulation of acute inflammatory response to antigenic stimulus	0.0288624	1
biological_process	GO:0006553	lysine metabolic process	0.0288624	1
biological_process	GO:0009635	response to herbicide	0.0288624	1
biological_process	GO:0016322	neuron remodeling	0.0288624	1
biological_process	GO:0031665	negative regulation of lipopolysaccharide-mediated signaling pathway	0.0288624	1
biological_process	GO:0032823	regulation of natural killer cell differentiation	0.0288624	1
biological_process	GO:0035745	T-helper 2 cell cytokine production	0.0288624	1
biological_process	GO:0044793	negative regulation by host of viral process	0.0288624	1
biological_process	GO:0060100	positive regulation of phagocytosis, engulfment	0.0288624	1
biological_process	GO:0061042	vascular wound healing	0.0288624	1
biological_process	GO:0070208	protein heterotrimerization	0.0288624	1
biological_process	GO:0070431	nucleotide-binding oligomerization domain containing 2 signaling pathway	0.0288624	1
biological_process	GO:1902713	regulation of interferon-gamma secretion	0.0288624	1
biological_process	GO:1902894	negative regulation of pri-miRNA transcription by RNA polymerase II	0.0288624	1
biological_process	GO:1903726	negative regulation of phospholipid metabolic process	0.0288624	1
biological_process	GO:1905155	positive regulation of membrane invagination	0.0288624	1
biological_process	GO:0070661	leukocyte proliferation	0.0292364	1
biological_process	GO:0051051	negative regulation of transport	0.0292638	1
biological_process	GO:0018105	peptidyl-serine phosphorylation	0.0294874	1
biological_process	GO:0070646	protein modification by small protein removal	0.0294874	1
cellular_component	GO:0005788	endoplasmic reticulum lumen	0.0296623	1
biological_process	GO:0032501	multicellular organismal process	0.0296645	1
molecular_function	GO:0061783	peptidoglycan muralytic activity	0.0297146	1
biological_process	GO:0002698	negative regulation of immune effector process	0.0298413	1
biological_process	GO:0042493	response to drug	0.0300135	1
biological_process	GO:1903409	reactive oxygen species biosynthetic process	0.030762	1
biological_process	GO:0030216	keratinocyte differentiation	0.0310176	1
biological_process	GO:0030213	hyaluronan biosynthetic process	0.0310486	1
biological_process	GO:0035791	platelet-derived growth factor receptor-beta signaling pathway	0.0310486	1
biological_process	GO:0051712	positive regulation of killing of cells of other organism	0.0310486	1
biological_process	GO:0060009	Sertoli cell development	0.0310486	1
biological_process	GO:0072216	positive regulation of metanephros development	0.0310486	1
biological_process	GO:0098543	detection of other organism	0.0310486	1
biological_process	GO:1901722	regulation of cell proliferation involved in kidney development	0.0310486	1
biological_process	GO:1903624	regulation of DNA catabolic process	0.0310486	1
biological_process	GO:1905064	negative regulation of vascular smooth muscle cell differentiation	0.0310486	1
biological_process	GO:2000345	regulation of hepatocyte proliferation	0.0310486	1
biological_process	GO:0043299	leukocyte degranulation	0.0314471	1
biological_process	GO:1901700	response to oxygen-containing compound	0.0316366	1
biological_process	GO:0008637	apoptotic mitochondrial changes	0.0316939	1
biological_process	GO:0014066	regulation of phosphatidylinositol 3-kinase signaling	0.0316939	1
biological_process	GO:0045055	regulated exocytosis	0.0318547	1
biological_process	GO:0048731	system development	0.0320614	1
biological_process	GO:0045471	response to ethanol	0.032164	1
molecular_function	GO:0019783	ubiquitin-like protein-specific protease activity	0.0329421	1
biological_process	GO:0008015	blood circulation	0.0331467	1
biological_process	GO:0002467	germinal center formation	0.03323	1
biological_process	GO:0034111	negative regulation of homotypic cell-cell adhesion	0.03323	1
biological_process	GO:0034134	toll-like receptor 2 signaling pathway	0.03323	1
biological_process	GO:0044406	adhesion of symbiont to host	0.03323	1
biological_process	GO:0045073	regulation of chemokine biosynthetic process	0.03323	1
biological_process	GO:0060099	regulation of phagocytosis, engulfment	0.03323	1
biological_process	GO:0090192	regulation of glomerulus development	0.03323	1
biological_process	GO:0150146	cell junction disassembly	0.03323	1
biological_process	GO:1905065	positive regulation of vascular smooth muscle cell differentiation	0.03323	1
biological_process	GO:0002275	myeloid cell activation involved in immune response	0.0333388	1
biological_process	GO:0002576	platelet degranulation	0.033591	1
biological_process	GO:0010595	positive regulation of endothelial cell migration	0.033591	1
biological_process	GO:0051235	maintenance of location	0.0336599	1
biological_process	GO:0009914	hormone transport	0.0342021	1
molecular_function	GO:0005161	platelet-derived growth factor receptor binding	0.0342089	1
molecular_function	GO:1990404	protein ADP-ribosylase activity	0.0342089	1
biological_process	GO:0050801	ion homeostasis	0.0347647	1
biological_process	GO:0051252	regulation of RNA metabolic process	0.0349494	1
biological_process	GO:0003013	circulatory system process	0.0350978	1
biological_process	GO:0007568	aging	0.0353003	1
biological_process	GO:0001780	neutrophil homeostasis	0.0354066	1
biological_process	GO:0001977	renal system process involved in regulation of blood volume	0.0354066	1
biological_process	GO:0002295	T-helper cell lineage commitment	0.0354066	1
biological_process	GO:0002830	positive regulation of type 2 immune response	0.0354066	1
biological_process	GO:0007567	parturition	0.0354066	1
biological_process	GO:0010820	positive regulation of T cell chemotaxis	0.0354066	1
biological_process	GO:0042033	chemokine biosynthetic process	0.0354066	1
biological_process	GO:0043031	negative regulation of macrophage activation	0.0354066	1
biological_process	GO:0045623	negative regulation of T-helper cell differentiation	0.0354066	1
biological_process	GO:0050755	chemokine metabolic process	0.0354066	1
biological_process	GO:0060965	negative regulation of gene silencing by miRNA	0.0354066	1
biological_process	GO:0061158	3'-UTR-mediated mRNA destabilization	0.0354066	1
biological_process	GO:0072109	glomerular mesangium development	0.0354066	1
biological_process	GO:0072224	metanephric glomerulus development	0.0354066	1
biological_process	GO:1905153	regulation of membrane invagination	0.0354066	1
biological_process	GO:2000846	regulation of corticosteroid hormone secretion	0.0354066	1
biological_process	GO:0018209	peptidyl-serine modification	0.0355777	1
molecular_function	GO:0005149	interleukin-1 receptor binding	0.0364485	1
molecular_function	GO:0005521	lamin binding	0.0364485	1
molecular_function	GO:0030280	structural constituent of skin epidermis	0.0364485	1
biological_process	GO:0002920	regulation of humoral immune response	0.0365182	1
biological_process	GO:0006766	vitamin metabolic process	0.0365182	1
biological_process	GO:0032273	positive regulation of protein polymerization	0.0365182	1
biological_process	GO:1903322	positive regulation of protein modification by small protein conjugation or removal	0.0370154	1
molecular_function	GO:0046914	transition metal ion binding	0.037498	1
biological_process	GO:0002705	positive regulation of leukocyte mediated immunity	0.0375153	1
biological_process	GO:0002693	positive regulation of cellular extravasation	0.0375784	1
biological_process	GO:0006825	copper ion transport	0.0375784	1
biological_process	GO:0010715	regulation of extracellular matrix disassembly	0.0375784	1
biological_process	GO:0010819	regulation of T cell chemotaxis	0.0375784	1
biological_process	GO:0017085	response to insecticide	0.0375784	1
biological_process	GO:0032740	positive regulation of interleukin-17 production	0.0375784	1
biological_process	GO:0032966	negative regulation of collagen biosynthetic process	0.0375784	1
biological_process	GO:0035930	corticosteroid hormone secretion	0.0375784	1
biological_process	GO:0042268	regulation of cytolysis	0.0375784	1
biological_process	GO:0043373	CD4-positive, alpha-beta T cell lineage commitment	0.0375784	1
biological_process	GO:0051709	regulation of killing of cells of other organism	0.0375784	1
biological_process	GO:1904996	positive regulation of leukocyte adhesion to vascular endothelial cell	0.0375784	1
biological_process	GO:0042742	defense response to bacterium	0.0378379	1
biological_process	GO:0051259	protein complex oligomerization	0.0381487	1
biological_process	GO:0046631	alpha-beta T cell activation	0.0385228	1
molecular_function	GO:0042834	peptidoglycan binding	0.0386829	1
biological_process	GO:0051251	positive regulation of lymphocyte activation	0.0389953	1
biological_process	GO:0033135	regulation of peptidyl-serine phosphorylation	0.0390304	1
biological_process	GO:0045580	regulation of T cell differentiation	0.0390304	1
molecular_function	GO:0005515	protein binding	0.0395322	1
biological_process	GO:0010713	negative regulation of collagen metabolic process	0.0397454	1
biological_process	GO:0051023	regulation of immunoglobulin secretion	0.0397454	1
biological_process	GO:0070633	transepithelial transport	0.0397454	1
biological_process	GO:0072574	hepatocyte proliferation	0.0397454	1
biological_process	GO:0072575	epithelial cell proliferation involved in liver morphogenesis	0.0397454	1
biological_process	GO:0090330	regulation of platelet aggregation	0.0397454	1
biological_process	GO:0150078	positive regulation of neuroinflammatory response	0.0397454	1
biological_process	GO:1900153	positive regulation of nuclear-transcribed mRNA catabolic process, deadenylation-dependent decay	0.0397454	1
biological_process	GO:2000319	regulation of T-helper 17 cell differentiation	0.0397454	1
biological_process	GO:0071496	cellular response to external stimulus	0.0404674	1
cellular_component	GO:0000145	exocyst	0.0406512	1
molecular_function	GO:0035613	RNA stem-loop binding	0.0409124	1
biological_process	GO:0035296	regulation of tube diameter	0.0410866	1
biological_process	GO:0097746	regulation of blood vessel diameter	0.0410866	1
biological_process	GO:0045936	negative regulation of phosphate metabolic process	0.0413494	1
biological_process	GO:0010563	negative regulation of phosphorus metabolic process	0.0415681	1
biological_process	GO:0035150	regulation of tube size	0.041607	1
biological_process	GO:0043603	cellular amide metabolic process	0.0416188	1
biological_process	GO:0001101	response to acid chemical	0.0416653	1
biological_process	GO:0002363	alpha-beta T cell lineage commitment	0.0419077	1
biological_process	GO:0002726	positive regulation of T cell cytokine production	0.0419077	1
biological_process	GO:0002922	positive regulation of humoral immune response	0.0419077	1
biological_process	GO:0003085	negative regulation of systemic arterial blood pressure	0.0419077	1
biological_process	GO:0010888	negative regulation of lipid storage	0.0419077	1
biological_process	GO:0034138	toll-like receptor 3 signaling pathway	0.0419077	1
biological_process	GO:0060149	negative regulation of posttranscriptional gene silencing	0.0419077	1
biological_process	GO:0060252	positive regulation of glial cell proliferation	0.0419077	1
biological_process	GO:0060967	negative regulation of gene silencing by RNA	0.0419077	1
biological_process	GO:0071071	regulation of phospholipid biosynthetic process	0.0419077	1
biological_process	GO:0071243	cellular response to arsenic-containing substance	0.0419077	1
biological_process	GO:0072576	liver morphogenesis	0.0419077	1
biological_process	GO:0098581	detection of external biotic stimulus	0.0419077	1
biological_process	GO:1901741	positive regulation of myoblast fusion	0.0419077	1
biological_process	GO:1902074	response to salt	0.0419077	1
biological_process	GO:1903798	regulation of production of miRNAs involved in gene silencing by miRNA	0.0419077	1
biological_process	GO:1905288	vascular associated smooth muscle cell apoptotic process	0.0419077	1
biological_process	GO:1905459	regulation of vascular associated smooth muscle cell apoptotic process	0.0419077	1
biological_process	GO:2000251	positive regulation of actin cytoskeleton reorganization	0.0419077	1
biological_process	GO:2000831	regulation of steroid hormone secretion	0.0419077	1
biological_process	GO:0007605	sensory perception of sound	0.0421299	1
biological_process	GO:0002224	toll-like receptor signaling pathway	0.0426552	1
biological_process	GO:0042542	response to hydrogen peroxide	0.0426552	1
biological_process	GO:0051384	response to glucocorticoid	0.0426552	1
cellular_component	GO:0071682	endocytic vesicle lumen	0.0427454	1
biological_process	GO:0022603	regulation of anatomical structure morphogenesis	0.0431319	1
molecular_function	GO:0016646	oxidoreductase activity, acting on the CH-NH group of donors, NAD or NADP as acceptor	0.0431367	1
molecular_function	GO:0016722	oxidoreductase activity, oxidizing metal ions	0.0431367	1
biological_process	GO:0014065	phosphatidylinositol 3-kinase signaling	0.0437134	1
molecular_function	GO:0140030	modification-dependent protein binding	0.0438564	1
biological_process	GO:0032495	response to muramyl dipeptide	0.0440652	1
biological_process	GO:0034143	regulation of toll-like receptor 4 signaling pathway	0.0440652	1
biological_process	GO:0034393	positive regulation of smooth muscle cell apoptotic process	0.0440652	1
biological_process	GO:0043369	CD4-positive or CD8-positive, alpha-beta T cell lineage commitment	0.0440652	1
biological_process	GO:0043371	negative regulation of CD4-positive, alpha-beta T cell differentiation	0.0440652	1
biological_process	GO:0045019	negative regulation of nitric oxide biosynthetic process	0.0440652	1
biological_process	GO:0060008	Sertoli cell differentiation	0.0440652	1
biological_process	GO:1900151	regulation of nuclear-transcribed mRNA catabolic process, deadenylation-dependent decay	0.0440652	1
biological_process	GO:1903978	regulation of microglial cell activation	0.0440652	1
biological_process	GO:1904406	negative regulation of nitric oxide metabolic process	0.0440652	1
biological_process	GO:0002706	regulation of lymphocyte mediated immunity	0.0442462	1
biological_process	GO:0002449	lymphocyte mediated immunity	0.0444263	1
biological_process	GO:0010631	epithelial cell migration	0.0444263	1
molecular_function	GO:0030506	ankyrin binding	0.0453561	1
biological_process	GO:0090132	epithelium migration	0.0453666	1
biological_process	GO:0048646	anatomical structure formation involved in morphogenesis	0.046103	1
biological_process	GO:0001779	natural killer cell differentiation	0.046218	1
biological_process	GO:0030277	maintenance of gastrointestinal epithelium	0.046218	1
biological_process	GO:0032682	negative regulation of chemokine production	0.046218	1
biological_process	GO:0035743	CD4-positive, alpha-beta T cell cytokine production	0.046218	1
biological_process	GO:0042403	thyroid hormone metabolic process	0.046218	1
biological_process	GO:0051900	regulation of mitochondrial depolarization	0.046218	1
biological_process	GO:0070920	regulation of production of small RNA involved in gene silencing by RNA	0.046218	1
biological_process	GO:0072111	cell proliferation involved in kidney development	0.046218	1
biological_process	GO:0090280	positive regulation of calcium ion import	0.046218	1
biological_process	GO:0140131	positive regulation of lymphocyte chemotaxis	0.046218	1
biological_process	GO:1900016	negative regulation of cytokine production involved in inflammatory response	0.046218	1
biological_process	GO:1901739	regulation of myoblast fusion	0.046218	1
biological_process	GO:1903055	positive regulation of extracellular matrix organization	0.046218	1
biological_process	GO:2000316	regulation of T-helper 17 type immune response	0.046218	1
biological_process	GO:0042133	neurotransmitter metabolic process	0.0464016	1
biological_process	GO:0051130	positive regulation of cellular component organization	0.0472297	1
biological_process	GO:0090130	tissue migration	0.0472772	1
biological_process	GO:1903707	negative regulation of hemopoiesis	0.0474937	1
molecular_function	GO:0001848	complement binding	0.0475704	1
molecular_function	GO:0070530	K63-linked polyubiquitin modification-dependent protein binding	0.0475704	1
biological_process	GO:0030097	hemopoiesis	0.0476634	1
biological_process	GO:0044057	regulation of system process	0.0482013	1
biological_process	GO:0003094	glomerular filtration	0.0483661	1
biological_process	GO:0006925	inflammatory cell apoptotic process	0.0483661	1
biological_process	GO:0007398	ectoderm development	0.0483661	1
biological_process	GO:0010866	regulation of triglyceride biosynthetic process	0.0483661	1
biological_process	GO:0032069	regulation of nuclease activity	0.0483661	1
biological_process	GO:0035584	calcium-mediated signaling using intracellular calcium source	0.0483661	1
biological_process	GO:0035929	steroid hormone secretion	0.0483661	1
biological_process	GO:0044342	type B pancreatic cell proliferation	0.0483661	1
biological_process	GO:0045663	positive regulation of myoblast differentiation	0.0483661	1
biological_process	GO:0048305	immunoglobulin secretion	0.0483661	1
biological_process	GO:0072643	interferon-gamma secretion	0.0483661	1
molecular_function	GO:0070011	peptidase activity, acting on L-amino acid peptides	0.0490606	1
biological_process	GO:0030198	extracellular matrix organization	0.0495564	1
molecular_function	GO:0003950	NAD+ ADP-ribosyltransferase activity	0.0497797	1
biological_process	GO:0043062	extracellular structure organization	0.0498864	1
biological_process	GO:0030203	glycosaminoglycan metabolic process	0.0502651	1
biological_process	GO:0032680	regulation of tumor necrosis factor production	0.0502651	1
biological_process	GO:0009068	aspartate family amino acid catabolic process	0.0505094	1
biological_process	GO:0032703	negative regulation of interleukin-2 production	0.0505094	1
biological_process	GO:0051151	negative regulation of smooth muscle cell differentiation	0.0505094	1
biological_process	GO:0051152	positive regulation of smooth muscle cell differentiation	0.0505094	1
biological_process	GO:0051882	mitochondrial depolarization	0.0505094	1
biological_process	GO:0060055	angiogenesis involved in wound healing	0.0505094	1
biological_process	GO:0072215	regulation of metanephros development	0.0505094	1
biological_process	GO:0097205	renal filtration	0.0505094	1
biological_process	GO:0045944	positive regulation of transcription by RNA polymerase II	0.050714	1
biological_process	GO:0048856	anatomical structure development	0.0507235	1
biological_process	GO:0030833	regulation of actin filament polymerization	0.0513898	1
biological_process	GO:0031960	response to corticosteroid	0.0513898	1
biological_process	GO:0032640	tumor necrosis factor production	0.0519556	1
biological_process	GO:1903555	regulation of tumor necrosis factor superfamily cytokine production	0.0519556	1
biological_process	GO:0002861	regulation of inflammatory response to antigenic stimulus	0.052648	1
biological_process	GO:0033081	regulation of T cell differentiation in thymus	0.052648	1
biological_process	GO:0034629	cellular protein-containing complex localization	0.052648	1
biological_process	GO:0046639	negative regulation of alpha-beta T cell differentiation	0.052648	1
molecular_function	GO:0004252	serine-type endopeptidase activity	0.0529492	1
cellular_component	GO:0031225	anchored component of membrane	0.0530054	1
biological_process	GO:0050954	sensory perception of mechanical stimulus	0.053094	1
biological_process	GO:0002696	positive regulation of leukocyte activation	0.0535878	1
cellular_component	GO:0005775	vacuolar lumen	0.0541169	1
biological_process	GO:0035239	tube morphogenesis	0.0542342	1
biological_process	GO:0033209	tumor necrosis factor-mediated signaling pathway	0.0542413	1
biological_process	GO:0002507	tolerance induction	0.0547819	1
biological_process	GO:0003071	renal system process involved in regulation of systemic arterial blood pressure	0.0547819	1
biological_process	GO:0019430	removal of superoxide radicals	0.0547819	1
biological_process	GO:0031639	plasminogen activation	0.0547819	1
biological_process	GO:0031664	regulation of lipopolysaccharide-mediated signaling pathway	0.0547819	1
biological_process	GO:0034110	regulation of homotypic cell-cell adhesion	0.0547819	1
biological_process	GO:0044068	modulation by symbiont of host cellular process	0.0547819	1
biological_process	GO:0072012	glomerulus vasculature development	0.0547819	1
biological_process	GO:0072202	cell differentiation involved in metanephros development	0.0547819	1
biological_process	GO:0071706	tumor necrosis factor superfamily cytokine production	0.0548183	1
biological_process	GO:0031349	positive regulation of defense response	0.0549662	1
molecular_function	GO:0008233	peptidase activity	0.0552162	1
cellular_component	GO:0030867	rough endoplasmic reticulum membrane	0.0552173	1
biological_process	GO:0042692	muscle cell differentiation	0.0553134	1
biological_process	GO:0006022	aminoglycan metabolic process	0.0559788	1
biological_process	GO:0043433	negative regulation of DNA-binding transcription factor activity	0.0559788	1
biological_process	GO:0048522	positive regulation of cellular process	0.0560398	1
biological_process	GO:0048534	hematopoietic or lymphoid organ development	0.056115	1
molecular_function	GO:0043027	cysteine-type endopeptidase inhibitor activity involved in apoptotic process	0.0563777	1
biological_process	GO:0010634	positive regulation of epithelial cell migration	0.0565623	1
biological_process	GO:0002230	positive regulation of defense response to virus by host	0.0569111	1
biological_process	GO:0002360	T cell lineage commitment	0.0569111	1
biological_process	GO:0006309	apoptotic DNA fragmentation	0.0569111	1
biological_process	GO:0031954	positive regulation of protein autophosphorylation	0.0569111	1
biological_process	GO:1904754	positive regulation of vascular associated smooth muscle cell migration	0.0569111	1
biological_process	GO:0032874	positive regulation of stress-activated MAPK cascade	0.057148	1
biological_process	GO:0019219	regulation of nucleobase-containing compound metabolic process	0.057239	1
cellular_component	GO:0005741	mitochondrial outer membrane	0.0575009	1
biological_process	GO:0003018	vascular process in circulatory system	0.0577359	1
biological_process	GO:0070304	positive regulation of stress-activated protein kinase signaling cascade	0.0577359	1
biological_process	GO:0050867	positive regulation of cell activation	0.0584868	1
molecular_function	GO:0030371	translation repressor activity	0.0585671	1
molecular_function	GO:0035925	mRNA 3'-UTR AU-rich region binding	0.0585671	1
molecular_function	GO:0051019	mitogen-activated protein kinase binding	0.0585671	1
biological_process	GO:0006956	complement activation	0.058918	1
biological_process	GO:0071704	organic substance metabolic process	0.0589548	1
biological_process	GO:0045932	negative regulation of muscle contraction	0.0590356	1
biological_process	GO:0048143	astrocyte activation	0.0590356	1
biological_process	GO:0060143	positive regulation of syncytium formation by plasma membrane fusion	0.0590356	1
biological_process	GO:0061437	renal system vasculature development	0.0590356	1
biological_process	GO:0061440	kidney vasculature development	0.0590356	1
biological_process	GO:0071450	cellular response to oxygen radical	0.0590356	1
biological_process	GO:0071451	cellular response to superoxide	0.0590356	1
biological_process	GO:1901623	regulation of lymphocyte chemotaxis	0.0590356	1
cellular_component	GO:0005764	lysosome	0.0594981	1
biological_process	GO:0032502	developmental process	0.0595383	1
cellular_component	GO:0000323	lytic vacuole	0.0597582	1
biological_process	GO:0001959	regulation of cytokine-mediated signaling pathway	0.0601086	1
biological_process	GO:0002691	regulation of cellular extravasation	0.0611555	1
biological_process	GO:0010818	T cell chemotaxis	0.0611555	1
biological_process	GO:0034698	response to gonadotropin	0.0611555	1
biological_process	GO:0035456	response to interferon-beta	0.0611555	1
biological_process	GO:0042730	fibrinolysis	0.0611555	1
biological_process	GO:0045745	positive regulation of G protein-coupled receptor signaling pathway	0.0611555	1
biological_process	GO:1904994	regulation of leukocyte adhesion to vascular endothelial cell	0.0611555	1
biological_process	GO:0008064	regulation of actin polymerization or depolymerization	0.0613075	1
biological_process	GO:0048771	tissue remodeling	0.0613075	1
biological_process	GO:1903532	positive regulation of secretion by cell	0.0617456	1
biological_process	GO:0022408	negative regulation of cell-cell adhesion	0.0619101	1
biological_process	GO:0030832	regulation of actin filament length	0.0619101	1
biological_process	GO:0071466	cellular response to xenobiotic stimulus	0.0619101	1
biological_process	GO:0048015	phosphatidylinositol-mediated signaling	0.0625147	1
molecular_function	GO:0016645	oxidoreductase activity, acting on the CH-NH group of donors	0.062931	1
molecular_function	GO:0017091	AU-rich element binding	0.062931	1
biological_process	GO:0008217	regulation of blood pressure	0.0631214	1
biological_process	GO:0030041	actin filament polymerization	0.0631214	1
biological_process	GO:0000303	response to superoxide	0.0632707	1
biological_process	GO:0010669	epithelial structure maintenance	0.0632707	1
biological_process	GO:0045822	negative regulation of heart contraction	0.0632707	1
biological_process	GO:0060142	regulation of syncytium formation by plasma membrane fusion	0.0632707	1
biological_process	GO:0070102	interleukin-6-mediated signaling pathway	0.0632707	1
biological_process	GO:0070528	protein kinase C signaling	0.0632707	1
biological_process	GO:1900027	regulation of ruffle assembly	0.0632707	1
biological_process	GO:2000515	negative regulation of CD4-positive, alpha-beta T cell activation	0.0632707	1
biological_process	GO:0061061	muscle structure development	0.0634245	1
biological_process	GO:0038061	NIK/NF-kappaB signaling	0.0637301	1
biological_process	GO:0008152	metabolic process	0.0639791	1
biological_process	GO:0019216	regulation of lipid metabolic process	0.0643386	1
biological_process	GO:0042098	T cell proliferation	0.0643408	1
biological_process	GO:0048017	inositol lipid-mediated signaling	0.0643408	1
biological_process	GO:0050864	regulation of B cell activation	0.0643408	1
cellular_component	GO:0031966	mitochondrial membrane	0.0648186	1
biological_process	GO:1903708	positive regulation of hemopoiesis	0.0649535	1
molecular_function	GO:0070566	adenylyltransferase activity	0.0651055	1
biological_process	GO:0000305	response to oxygen radical	0.0653812	1
biological_process	GO:0001782	B cell homeostasis	0.0653812	1
biological_process	GO:0002828	regulation of type 2 immune response	0.0653812	1
biological_process	GO:0009595	detection of biotic stimulus	0.0653812	1
biological_process	GO:0010586	miRNA metabolic process	0.0653812	1
biological_process	GO:0050869	negative regulation of B cell activation	0.0653812	1
biological_process	GO:0061157	mRNA destabilization	0.0653812	1
biological_process	GO:0071549	cellular response to dexamethasone stimulus	0.0653812	1
biological_process	GO:0019725	cellular homeostasis	0.0656263	1
molecular_function	GO:0008236	serine-type peptidase activity	0.0664348	1
biological_process	GO:0002724	regulation of T cell cytokine production	0.0674871	1
biological_process	GO:0034661	ncRNA catabolic process	0.0674871	1
biological_process	GO:0045737	positive regulation of cyclin-dependent protein serine/threonine kinase activity	0.0674871	1
biological_process	GO:0048710	regulation of astrocyte differentiation	0.0674871	1
biological_process	GO:1902895	positive regulation of pri-miRNA transcription by RNA polymerase II	0.0674871	1
molecular_function	GO:0008234	cysteine-type peptidase activity	0.0677129	1
biological_process	GO:0043588	skin development	0.0677464	1
biological_process	GO:0060759	regulation of response to cytokine stimulus	0.0680469	1
biological_process	GO:0051054	positive regulation of DNA metabolic process	0.0686715	1
molecular_function	GO:0016825	hydrolase activity, acting on acid phosphorus-nitrogen bonds	0.0689993	1
molecular_function	GO:0017171	serine hydrolase activity	0.0689993	1
molecular_function	GO:0005164	tumor necrosis factor receptor binding	0.0694399	1
molecular_function	GO:0035198	miRNA binding	0.0694399	1
biological_process	GO:0001975	response to amphetamine	0.0695884	1
biological_process	GO:0002323	natural killer cell activation involved in immune response	0.0695884	1
biological_process	GO:0032814	regulation of natural killer cell activation	0.0695884	1
biological_process	GO:0042311	vasodilation	0.0695884	1
biological_process	GO:0043552	positive regulation of phosphatidylinositol 3-kinase activity	0.0695884	1
biological_process	GO:0045907	positive regulation of vasoconstriction	0.0695884	1
biological_process	GO:0046685	response to arsenic-containing substance	0.0695884	1
biological_process	GO:0050779	RNA destabilization	0.0695884	1
biological_process	GO:1900745	positive regulation of p38MAPK cascade	0.0695884	1
biological_process	GO:1904467	regulation of tumor necrosis factor secretion	0.0695884	1
biological_process	GO:0006417	regulation of translation	0.0696753	1
biological_process	GO:0006357	regulation of transcription by RNA polymerase II	0.0698183	1
cellular_component	GO:0031968	organelle outer membrane	0.0711245	1
biological_process	GO:0051047	positive regulation of secretion	0.0712364	1
biological_process	GO:0001933	negative regulation of protein phosphorylation	0.0716292	1
biological_process	GO:0002888	positive regulation of myeloid leukocyte mediated immunity	0.071685	1
biological_process	GO:0006471	protein ADP-ribosylation	0.071685	1
biological_process	GO:0030851	granulocyte differentiation	0.071685	1
biological_process	GO:0033028	myeloid cell apoptotic process	0.071685	1
biological_process	GO:0045736	negative regulation of cyclin-dependent protein serine/threonine kinase activity	0.071685	1
biological_process	GO:0070536	protein K63-linked deubiquitination	0.071685	1
biological_process	GO:1901223	negative regulation of NIK/NF-kappaB signaling	0.071685	1
cellular_component	GO:0019867	outer membrane	0.0723552	1
biological_process	GO:0048518	positive regulation of biological process	0.0730919	1
biological_process	GO:0046890	regulation of lipid biosynthetic process	0.0730966	1
biological_process	GO:0050673	epithelial cell proliferation	0.0736081	1
biological_process	GO:0006109	regulation of carbohydrate metabolic process	0.0737363	1
biological_process	GO:0061013	regulation of mRNA catabolic process	0.0737363	1
biological_process	GO:0000737	DNA catabolic process, endonucleolytic	0.0737771	1
biological_process	GO:0032148	activation of protein kinase B activity	0.0737771	1
biological_process	GO:0032660	regulation of interleukin-17 production	0.0737771	1
biological_process	GO:0043368	positive T cell selection	0.0737771	1
biological_process	GO:0070050	neuron cellular homeostasis	0.0737771	1
biological_process	GO:1904030	negative regulation of cyclin-dependent protein kinase activity	0.0737771	1
biological_process	GO:0002683	negative regulation of immune system process	0.0740068	1
cellular_component	GO:0001772	immunological synapse	0.0756519	1
biological_process	GO:0006412	translation	0.0756528	1
biological_process	GO:0051701	interaction with host	0.0756662	1
biological_process	GO:0000266	mitochondrial fission	0.0758645	1
biological_process	GO:0030262	apoptotic nuclear changes	0.0758645	1
biological_process	GO:0034142	toll-like receptor 4 signaling pathway	0.0758645	1
biological_process	GO:0042092	type 2 immune response	0.0758645	1
biological_process	GO:0045622	regulation of T-helper cell differentiation	0.0758645	1
biological_process	GO:0060251	regulation of glial cell proliferation	0.0758645	1
biological_process	GO:0070423	nucleotide-binding oligomerization domain containing signaling pathway	0.0758645	1
biological_process	GO:0071108	protein K48-linked deubiquitination	0.0758645	1
biological_process	GO:0071312	cellular response to alkaloid	0.0758645	1
biological_process	GO:0098801	regulation of renal system process	0.0758645	1
biological_process	GO:1904031	positive regulation of cyclin-dependent protein kinase activity	0.0758645	1
biological_process	GO:1990774	tumor necrosis factor secretion	0.0758645	1
biological_process	GO:0051222	positive regulation of protein transport	0.0760152	1
cellular_component	GO:0005740	mitochondrial envelope	0.0764897	1
biological_process	GO:0006006	glucose metabolic process	0.0769619	1
biological_process	GO:0045766	positive regulation of angiogenesis	0.0769619	1
biological_process	GO:1902905	positive regulation of supramolecular fiber organization	0.0769619	1
biological_process	GO:0002755	MyD88-dependent toll-like receptor signaling pathway	0.0779473	1
biological_process	GO:0034390	smooth muscle cell apoptotic process	0.0779473	1
biological_process	GO:0034391	regulation of smooth muscle cell apoptotic process	0.0779473	1
biological_process	GO:0035872	nucleotide-binding domain, leucine rich repeat containing receptor signaling pathway	0.0779473	1
biological_process	GO:0090218	positive regulation of lipid kinase activity	0.0779473	1
biological_process	GO:0097242	amyloid-beta clearance	0.0779473	1
biological_process	GO:1901099	negative regulation of signal transduction in absence of ligand	0.0779473	1
biological_process	GO:2001240	negative regulation of extrinsic apoptotic signaling pathway in absence of ligand	0.0779473	1
biological_process	GO:0050679	positive regulation of epithelial cell proliferation	0.0782647	1
biological_process	GO:0000956	nuclear-transcribed mRNA catabolic process	0.0789188	1
biological_process	GO:0002064	epithelial cell development	0.0789188	1
biological_process	GO:1901215	negative regulation of neuron death	0.0795746	1
biological_process	GO:0002714	positive regulation of B cell mediated immunity	0.0800256	1
biological_process	GO:0002891	positive regulation of immunoglobulin mediated immune response	0.0800256	1
biological_process	GO:0006921	cellular component disassembly involved in execution phase of apoptosis	0.0800256	1
biological_process	GO:0030212	hyaluronan metabolic process	0.0800256	1
biological_process	GO:0032885	regulation of polysaccharide biosynthetic process	0.0800256	1
biological_process	GO:0042307	positive regulation of protein import into nucleus	0.0800256	1
biological_process	GO:0043029	T cell homeostasis	0.0800256	1
biological_process	GO:1903427	negative regulation of reactive oxygen species biosynthetic process	0.0800256	1
biological_process	GO:2000249	regulation of actin cytoskeleton reorganization	0.0800256	1
biological_process	GO:0008154	actin polymerization or depolymerization	0.0802321	1
biological_process	GO:0017148	negative regulation of translation	0.0802321	1
biological_process	GO:0071229	cellular response to acid chemical	0.0802321	1
biological_process	GO:0031326	regulation of cellular biosynthetic process	0.0804738	1
biological_process	GO:0006355	regulation of transcription, DNA-templated	0.0806718	1
cellular_component	GO:0016323	basolateral plasma membrane	0.0811618	1
biological_process	GO:0055080	cation homeostasis	0.0812397	1
biological_process	GO:0010831	positive regulation of myotube differentiation	0.0820993	1
biological_process	GO:0032620	interleukin-17 production	0.0820993	1
biological_process	GO:0046636	negative regulation of alpha-beta T cell activation	0.0820993	1
biological_process	GO:0046825	regulation of protein export from nucleus	0.0820993	1
biological_process	GO:0048246	macrophage chemotaxis	0.0820993	1
biological_process	GO:0050716	positive regulation of interleukin-1 secretion	0.0820993	1
biological_process	GO:1903523	negative regulation of blood circulation	0.0820993	1
biological_process	GO:1904037	positive regulation of epithelial cell apoptotic process	0.0820993	1
biological_process	GO:1904706	negative regulation of vascular smooth muscle cell proliferation	0.0820993	1
biological_process	GO:0007275	multicellular organism development	0.0825093	1
biological_process	GO:1904951	positive regulation of establishment of protein localization	0.0826049	1
biological_process	GO:0043043	peptide biosynthetic process	0.0834674	1
biological_process	GO:0051254	positive regulation of RNA metabolic process	0.0838284	1
biological_process	GO:0002251	organ or tissue specific immune response	0.0841684	1
biological_process	GO:0010661	positive regulation of muscle cell apoptotic process	0.0841684	1
biological_process	GO:0060969	negative regulation of gene silencing	0.0841684	1
biological_process	GO:1904591	positive regulation of protein import	0.0841684	1
biological_process	GO:0043281	regulation of cysteine-type endopeptidase activity involved in apoptotic process	0.0842133	1
molecular_function	GO:0004532	exoribonuclease activity	0.0844562	1
biological_process	GO:0098771	inorganic ion homeostasis	0.0847542	1
biological_process	GO:0001667	ameboidal-type cell migration	0.0851388	1
biological_process	GO:0050794	regulation of cellular process	0.085275	1
biological_process	GO:0043393	regulation of protein binding	0.0855538	1
biological_process	GO:0080135	regulation of cellular response to stress	0.0857258	1
biological_process	GO:0032271	regulation of protein polymerization	0.0862266	1
biological_process	GO:0002369	T cell cytokine production	0.086233	1
biological_process	GO:0002823	negative regulation of adaptive immune response based on somatic recombination of immune receptors built from immunoglobulin superfamily domains	0.086233	1
biological_process	GO:0019835	cytolysis	0.086233	1
biological_process	GO:0042036	negative regulation of cytokine biosynthetic process	0.086233	1
biological_process	GO:0044003	modulation by symbiont of host process	0.086233	1
biological_process	GO:0071548	response to dexamethasone	0.086233	1
biological_process	GO:0072210	metanephric nephron development	0.086233	1
biological_process	GO:0090184	positive regulation of kidney development	0.086233	1
biological_process	GO:0090207	regulation of triglyceride metabolic process	0.086233	1
biological_process	GO:0009888	tissue development	0.0866017	1
biological_process	GO:0002699	positive regulation of immune effector process	0.0869009	1
biological_process	GO:0033554	cellular response to stress	0.0869833	1
cellular_component	GO:0005773	vacuole	0.0872479	1
biological_process	GO:0042326	negative regulation of phosphorylation	0.0877063	1
biological_process	GO:0006308	DNA catabolic process	0.088293	1
biological_process	GO:0007520	myoblast fusion	0.088293	1
biological_process	GO:0019432	triglyceride biosynthetic process	0.088293	1
biological_process	GO:0034122	negative regulation of toll-like receptor signaling pathway	0.088293	1
biological_process	GO:0061028	establishment of endothelial barrier	0.088293	1
biological_process	GO:0090279	regulation of calcium ion import	0.088293	1
biological_process	GO:0097178	ruffle assembly	0.088293	1
biological_process	GO:0140353	lipid export from cell	0.088293	1
biological_process	GO:0150077	regulation of neuroinflammatory response	0.088293	1
biological_process	GO:1902893	regulation of pri-miRNA transcription by RNA polymerase II	0.088293	1
biological_process	GO:1903053	regulation of extracellular matrix organization	0.088293	1
molecular_function	GO:0030234	enzyme regulator activity	0.0884153	1
biological_process	GO:0045596	negative regulation of cell differentiation	0.0886739	1
biological_process	GO:0070663	regulation of leukocyte proliferation	0.0889337	1
biological_process	GO:0019752	carboxylic acid metabolic process	0.0894295	1
biological_process	GO:1903506	regulation of nucleic acid-templated transcription	0.0895916	1
biological_process	GO:0050778	positive regulation of immune response	0.0903332	1
biological_process	GO:0002639	positive regulation of immunoglobulin production	0.0903485	1
biological_process	GO:0042149	cellular response to glucose starvation	0.0903485	1
biological_process	GO:0046688	response to copper ion	0.0903485	1
biological_process	GO:0090503	RNA phosphodiester bond hydrolysis, exonucleolytic	0.0903485	1
biological_process	GO:2001141	regulation of RNA biosynthetic process	0.0903502	1
biological_process	GO:0009057	macromolecule catabolic process	0.0904464	1
biological_process	GO:0006366	transcription by RNA polymerase II	0.090959	1
biological_process	GO:0034248	regulation of cellular amide metabolic process	0.0911811	1
biological_process	GO:0009889	regulation of biosynthetic process	0.0914382	1
biological_process	GO:0034249	negative regulation of cellular amide metabolic process	0.0916664	1
biological_process	GO:0051495	positive regulation of cytoskeleton organization	0.0916664	1
biological_process	GO:0032881	regulation of polysaccharide metabolic process	0.0923994	1
biological_process	GO:0045429	positive regulation of nitric oxide biosynthetic process	0.0923994	1
biological_process	GO:0046460	neutral lipid biosynthetic process	0.0923994	1
biological_process	GO:0046463	acylglycerol biosynthetic process	0.0923994	1
biological_process	GO:1904646	cellular response to amyloid-beta	0.0923994	1
molecular_function	GO:0043028	cysteine-type endopeptidase regulator activity involved in apoptotic process	0.0929305	1
biological_process	GO:0010594	regulation of endothelial cell migration	0.0937323	1
biological_process	GO:0010828	positive regulation of glucose transmembrane transport	0.0944459	1
biological_process	GO:0014002	astrocyte development	0.0944459	1
biological_process	GO:0032965	regulation of collagen biosynthetic process	0.0944459	1
biological_process	GO:0035850	epithelial cell differentiation involved in kidney development	0.0944459	1
biological_process	GO:0044060	regulation of endocrine process	0.0944459	1
biological_process	GO:0061756	leukocyte adhesion to vascular endothelial cell	0.0944459	1
biological_process	GO:1904407	positive regulation of nitric oxide metabolic process	0.0944459	1
molecular_function	GO:0048020	CCR chemokine receptor binding	0.0950371	1
molecular_function	GO:0061980	regulatory RNA binding	0.0950371	1
biological_process	GO:0044237	cellular metabolic process	0.0955546	1
biological_process	GO:2000112	regulation of cellular macromolecule biosynthetic process	0.0961636	1
biological_process	GO:0002820	negative regulation of adaptive immune response	0.0964878	1
biological_process	GO:0031018	endocrine pancreas development	0.0964878	1
biological_process	GO:0045581	negative regulation of T cell differentiation	0.0964878	1
biological_process	GO:0097305	response to alcohol	0.096508	1
molecular_function	GO:0005539	glycosaminoglycan binding	0.098473	1
biological_process	GO:0007157	heterophilic cell-cell adhesion via plasma membrane cell adhesion molecules	0.0985253	1
biological_process	GO:0014075	response to amine	0.0985253	1
biological_process	GO:0032480	negative regulation of type I interferon production	0.0985253	1
biological_process	GO:0035196	production of miRNAs involved in gene silencing by miRNA	0.0985253	1
biological_process	GO:0043277	apoptotic cell clearance	0.0985253	1
biological_process	GO:0045776	negative regulation of blood pressure	0.0985253	1
biological_process	GO:1900015	regulation of cytokine production involved in inflammatory response	0.0985253	1
biological_process	GO:1904738	vascular associated smooth muscle cell migration	0.0985253	1
biological_process	GO:1904752	regulation of vascular associated smooth muscle cell migration	0.0985253	1
biological_process	GO:0031669	cellular response to nutrient levels	0.0993075	1
biological_process	GO:0032872	regulation of stress-activated MAPK cascade	0.0993075	1
cellular_component	GO:0031312	extrinsic component of organelle membrane	0.0996042	1
biological_process	GO:0006810	transport	0.100406	1
biological_process	GO:0014911	positive regulation of smooth muscle cell migration	0.100558	1
biological_process	GO:0031952	regulation of protein autophosphorylation	0.100558	1
biological_process	GO:0035722	interleukin-12-mediated signaling pathway	0.100558	1
biological_process	GO:0042551	neuron maturation	0.100558	1
biological_process	GO:0043370	regulation of CD4-positive, alpha-beta T cell differentiation	0.100558	1
biological_process	GO:0045058	T cell selection	0.100558	1
biological_process	GO:0060986	endocrine hormone secretion	0.100558	1
biological_process	GO:0061614	pri-miRNA transcription by RNA polymerase II	0.100558	1
biological_process	GO:1900744	regulation of p38MAPK cascade	0.100558	1
biological_process	GO:2001239	regulation of extrinsic apoptotic signaling pathway in absence of ligand	0.100558	1
biological_process	GO:0070302	regulation of stress-activated protein kinase signaling cascade	0.100716	1
biological_process	GO:2000116	regulation of cysteine-type endopeptidase activity	0.100716	1
molecular_function	GO:0032813	tumor necrosis factor receptor superfamily binding	0.101328	1
biological_process	GO:0035295	tube development	0.101962	1
biological_process	GO:0042593	glucose homeostasis	0.10213	1
biological_process	GO:0065007	biological regulation	0.102481	1
biological_process	GO:0001774	microglial cell activation	0.102587	1
biological_process	GO:0002269	leukocyte activation involved in inflammatory response	0.102587	1
biological_process	GO:0002711	positive regulation of T cell mediated immunity	0.102587	1
biological_process	GO:0072604	interleukin-6 secretion	0.102587	1
biological_process	GO:1903727	positive regulation of phospholipid metabolic process	0.102587	1
biological_process	GO:0033500	carbohydrate homeostasis	0.102839	1
molecular_function	GO:0016763	transferase activity, transferring pentosyl groups	0.103416	1
biological_process	GO:0019318	hexose metabolic process	0.104262	1
biological_process	GO:0031334	positive regulation of protein-containing complex assembly	0.104262	1
biological_process	GO:0002534	cytokine production involved in inflammatory response	0.104611	1
biological_process	GO:0003044	regulation of systemic arterial blood pressure mediated by a chemical signal	0.104611	1
biological_process	GO:0003254	regulation of membrane depolarization	0.104611	1
biological_process	GO:0010712	regulation of collagen metabolic process	0.104611	1
biological_process	GO:0071349	cellular response to interleukin-12	0.104611	1
biological_process	GO:1904707	positive regulation of vascular smooth muscle cell proliferation	0.104611	1
biological_process	GO:0090066	regulation of anatomical structure size	0.104718	1
cellular_component	GO:0005782	peroxisomal matrix	0.105497	1
cellular_component	GO:0031907	microbody lumen	0.105497	1
biological_process	GO:0006351	transcription, DNA-templated	0.106404	1
biological_process	GO:0010718	positive regulation of epithelial to mesenchymal transition	0.10663	1
biological_process	GO:0014009	glial cell proliferation	0.10663	1
biological_process	GO:0070671	response to interleukin-12	0.10663	1
molecular_function	GO:0008009	chemokine activity	0.107577	1
biological_process	GO:0033157	regulation of intracellular protein transport	0.108562	1
biological_process	GO:0002712	regulation of B cell mediated immunity	0.108645	1
biological_process	GO:0002889	regulation of immunoglobulin mediated immune response	0.108645	1
biological_process	GO:0009066	aspartate family amino acid metabolic process	0.108645	1
biological_process	GO:0031050	dsRNA processing	0.108645	1
biological_process	GO:0045599	negative regulation of fat cell differentiation	0.108645	1
biological_process	GO:0048146	positive regulation of fibroblast proliferation	0.108645	1
biological_process	GO:0048260	positive regulation of receptor-mediated endocytosis	0.108645	1
biological_process	GO:0070918	production of small RNA involved in gene silencing by RNA	0.108645	1
biological_process	GO:0072666	establishment of protein localization to vacuole	0.108645	1
biological_process	GO:0097366	response to bronchodilator	0.108645	1
biological_process	GO:0071900	regulation of protein serine/threonine kinase activity	0.10893	1
biological_process	GO:0055082	cellular chemical homeostasis	0.109209	1
biological_process	GO:0045017	glycerolipid biosynthetic process	0.109284	1
biological_process	GO:0031529	ruffle organization	0.110656	1
molecular_function	GO:0046982	protein heterodimerization activity	0.111281	1
biological_process	GO:0051924	regulation of calcium ion transport	0.111456	1
molecular_function	GO:0016787	hydrolase activity	0.112085	1
biological_process	GO:0006732	coenzyme metabolic process	0.112183	1
biological_process	GO:0031638	zymogen activation	0.112662	1
biological_process	GO:0032964	collagen biosynthetic process	0.112662	1
biological_process	GO:0038066	p38MAPK cascade	0.112662	1
biological_process	GO:0045661	regulation of myoblast differentiation	0.112662	1
biological_process	GO:0045840	positive regulation of mitotic nuclear division	0.112662	1
biological_process	GO:1905517	macrophage migration	0.112662	1
biological_process	GO:0031329	regulation of cellular catabolic process	0.113262	1
biological_process	GO:0010817	regulation of hormone levels	0.113687	1
molecular_function	GO:0050661	NADP binding	0.113783	1
biological_process	GO:0043406	positive regulation of MAP kinase activity	0.11437	1
biological_process	GO:0007005	mitochondrion organization	0.114648	1
biological_process	GO:0002720	positive regulation of cytokine production involved in immune response	0.114664	1
biological_process	GO:0032663	regulation of interleukin-2 production	0.114664	1
biological_process	GO:0061005	cell differentiation involved in kidney development	0.114664	1
biological_process	GO:0070206	protein trimerization	0.114664	1
biological_process	GO:1904645	response to amyloid-beta	0.114664	1
biological_process	GO:0097659	nucleic acid-templated transcription	0.11471	1
biological_process	GO:0043436	oxoacid metabolic process	0.115665	1
molecular_function	GO:0001102	RNA polymerase II activating transcription factor binding	0.115842	1
biological_process	GO:0110053	regulation of actin filament organization	0.116569	1
biological_process	GO:0001541	ovarian follicle development	0.116662	1
biological_process	GO:0042306	regulation of protein import into nucleus	0.116662	1
biological_process	GO:0043551	regulation of phosphatidylinositol 3-kinase activity	0.116662	1
biological_process	GO:0061098	positive regulation of protein tyrosine kinase activity	0.116662	1
biological_process	GO:0032774	RNA biosynthetic process	0.117027	1
cellular_component	GO:0005737	cytoplasm	0.117595	1
biological_process	GO:0034655	nucleobase-containing compound catabolic process	0.118037	1
biological_process	GO:0010556	regulation of macromolecule biosynthetic process	0.118424	1
biological_process	GO:0044265	cellular macromolecule catabolic process	0.11851	1
biological_process	GO:0000768	syncytium formation by plasma membrane fusion	0.118655	1
biological_process	GO:0031295	T cell costimulation	0.118655	1
biological_process	GO:0090183	regulation of kidney development	0.118655	1
biological_process	GO:0140253	cell-cell fusion	0.118655	1
biological_process	GO:0051234	establishment of localization	0.118772	1
molecular_function	GO:0008270	zinc ion binding	0.118936	1
cellular_component	GO:0005637	nuclear inner membrane	0.1191	1
cellular_component	GO:0035577	azurophil granule membrane	0.1191	1
biological_process	GO:0002886	regulation of myeloid leukocyte mediated immunity	0.120643	1
biological_process	GO:0031294	lymphocyte costimulation	0.120643	1
biological_process	GO:0051055	negative regulation of lipid biosynthetic process	0.120643	1
biological_process	GO:0071398	cellular response to fatty acid	0.120643	1
biological_process	GO:1903428	positive regulation of reactive oxygen species biosynthetic process	0.120643	1
biological_process	GO:0045935	positive regulation of nucleobase-containing compound metabolic process	0.1207	1
biological_process	GO:0031668	cellular response to extracellular stimulus	0.121741	1
biological_process	GO:0050714	positive regulation of protein secretion	0.121741	1
molecular_function	GO:0043621	protein self-association	0.121992	1
biological_process	GO:0006082	organic acid metabolic process	0.122034	1
biological_process	GO:0006949	syncytium formation	0.122628	1
biological_process	GO:0019229	regulation of vasoconstriction	0.122628	1
biological_process	GO:0031663	lipopolysaccharide-mediated signaling pathway	0.122628	1
biological_process	GO:0032722	positive regulation of chemokine production	0.122628	1
biological_process	GO:0061900	glial cell activation	0.122628	1
biological_process	GO:0071385	cellular response to glucocorticoid stimulus	0.122628	1
biological_process	GO:1904589	regulation of protein import	0.122628	1
biological_process	GO:0044238	primary metabolic process	0.123358	1
molecular_function	GO:0043022	ribosome binding	0.124033	1
biological_process	GO:0001885	endothelial cell development	0.124607	1
biological_process	GO:0010656	negative regulation of muscle cell apoptotic process	0.124607	1
biological_process	GO:0032732	positive regulation of interleukin-1 production	0.124607	1
biological_process	GO:0045824	negative regulation of innate immune response	0.124607	1
biological_process	GO:0070527	platelet aggregation	0.124607	1
biological_process	GO:0097755	positive regulation of blood vessel diameter	0.124607	1
biological_process	GO:0046651	lymphocyte proliferation	0.124723	1
cellular_component	GO:0031410	cytoplasmic vesicle	0.124739	1
cellular_component	GO:0097708	intracellular vesicle	0.125425	1
molecular_function	GO:0004869	cysteine-type endopeptidase inhibitor activity	0.126069	1
biological_process	GO:0032943	mononuclear cell proliferation	0.126221	1
biological_process	GO:0043542	endothelial cell migration	0.126221	1
biological_process	GO:0045893	positive regulation of transcription, DNA-templated	0.126655	1
molecular_function	GO:0005507	copper ion binding	0.128101	1
biological_process	GO:0006027	glycosaminoglycan catabolic process	0.128554	1
biological_process	GO:0010803	regulation of tumor necrosis factor-mediated signaling pathway	0.128554	1
biological_process	GO:0032370	positive regulation of lipid transport	0.128554	1
biological_process	GO:0045123	cellular extravasation	0.128554	1
biological_process	GO:0045604	regulation of epidermal cell differentiation	0.128554	1
biological_process	GO:0071384	cellular response to corticosteroid stimulus	0.128554	1
biological_process	GO:1905953	negative regulation of lipid localization	0.128554	1
biological_process	GO:2000514	regulation of CD4-positive, alpha-beta T cell activation	0.128554	1
cellular_component	GO:0009986	cell surface	0.13049	1
biological_process	GO:0002753	cytoplasmic pattern recognition receptor signaling pathway	0.130521	1
biological_process	GO:0010830	regulation of myotube differentiation	0.130521	1
biological_process	GO:0031640	killing of cells of other organism	0.130521	1
biological_process	GO:0032623	interleukin-2 production	0.130521	1
biological_process	GO:0032835	glomerulus development	0.130521	1
biological_process	GO:0046824	positive regulation of nucleocytoplasmic transport	0.130521	1
biological_process	GO:0065003	protein-containing complex assembly	0.13077	1
biological_process	GO:0002253	activation of immune response	0.131458	1
biological_process	GO:0002637	regulation of immunoglobulin production	0.132483	1
biological_process	GO:0046637	regulation of alpha-beta T cell differentiation	0.132483	1
biological_process	GO:0043604	amide biosynthetic process	0.132922	1
molecular_function	GO:0030145	manganese ion binding	0.134167	1
cellular_component	GO:0099023	vesicle tethering complex	0.1344	1
biological_process	GO:0043550	regulation of lipid kinase activity	0.134442	1
biological_process	GO:0045600	positive regulation of fat cell differentiation	0.134442	1
biological_process	GO:0045669	positive regulation of osteoblast differentiation	0.134442	1
biological_process	GO:2000378	negative regulation of reactive oxygen species metabolic process	0.134442	1
biological_process	GO:0006518	peptide metabolic process	0.134924	1
biological_process	GO:0051403	stress-activated MAPK cascade	0.135297	1
cellular_component	GO:0031965	nuclear membrane	0.136053	1
biological_process	GO:0005996	monosaccharide metabolic process	0.13606	1
biological_process	GO:0006026	aminoglycan catabolic process	0.136396	1
biological_process	GO:0051148	negative regulation of muscle cell differentiation	0.136396	1
biological_process	GO:0072665	protein localization to vacuole	0.136396	1
biological_process	GO:0002793	positive regulation of peptide secretion	0.136824	1
biological_process	GO:0007162	negative regulation of cell adhesion	0.137589	1
molecular_function	GO:0004521	endoribonuclease activity	0.138189	1
biological_process	GO:0051785	positive regulation of nuclear division	0.138345	1
biological_process	GO:0051926	negative regulation of calcium ion transport	0.138345	1
biological_process	GO:0010632	regulation of epithelial cell migration	0.139123	1
biological_process	GO:0009410	response to xenobiotic stimulus	0.139891	1
biological_process	GO:0010558	negative regulation of macromolecule biosynthetic process	0.139949	1
cellular_component	GO:0005881	cytoplasmic microtubule	0.14007	1
biological_process	GO:0042108	positive regulation of cytokine biosynthetic process	0.14029	1
biological_process	GO:2000573	positive regulation of DNA biosynthetic process	0.14029	1
biological_process	GO:0046700	heterocycle catabolic process	0.14174	1
molecular_function	GO:0042379	chemokine receptor binding	0.142192	1
biological_process	GO:0031343	positive regulation of cell killing	0.142231	1
biological_process	GO:0033627	cell adhesion mediated by integrin	0.142231	1
biological_process	GO:0035914	skeletal muscle cell differentiation	0.142231	1
biological_process	GO:0044270	cellular nitrogen compound catabolic process	0.142261	1
biological_process	GO:0050789	regulation of biological process	0.142304	1
biological_process	GO:1903522	regulation of blood circulation	0.143745	1
biological_process	GO:0050766	positive regulation of phagocytosis	0.144168	1
biological_process	GO:0002709	regulation of T cell mediated immunity	0.1461	1
biological_process	GO:0033077	T cell differentiation in thymus	0.1461	1
biological_process	GO:0034121	regulation of toll-like receptor signaling pathway	0.1461	1
biological_process	GO:0090305	nucleic acid phosphodiester bond hydrolysis	0.147623	1
biological_process	GO:0042531	positive regulation of tyrosine phosphorylation of STAT protein	0.148029	1
biological_process	GO:0044281	small molecule metabolic process	0.148498	1
biological_process	GO:0002532	production of molecular mediator involved in inflammatory response	0.149952	1
biological_process	GO:0051155	positive regulation of striated muscle cell differentiation	0.149952	1
biological_process	GO:0051881	regulation of mitochondrial membrane potential	0.149952	1
biological_process	GO:0019439	aromatic compound catabolic process	0.150691	1
biological_process	GO:0031328	positive regulation of cellular biosynthetic process	0.150759	1
biological_process	GO:0006801	superoxide metabolic process	0.151872	1
biological_process	GO:0045685	regulation of glial cell differentiation	0.151872	1
biological_process	GO:0061844	antimicrobial humoral immune response mediated by antimicrobial peptide	0.151872	1
biological_process	GO:1903524	positive regulation of blood circulation	0.151872	1
biological_process	GO:0046879	hormone secretion	0.152305	1
biological_process	GO:1903508	positive regulation of nucleic acid-templated transcription	0.152629	1
biological_process	GO:1902680	positive regulation of RNA biosynthetic process	0.152945	1
biological_process	GO:0014015	positive regulation of gliogenesis	0.153788	1
biological_process	GO:0070373	negative regulation of ERK1 and ERK2 cascade	0.153788	1
biological_process	GO:1900182	positive regulation of protein localization to nucleus	0.153788	1
biological_process	GO:0000209	protein polyubiquitination	0.153873	1
biological_process	GO:0042113	B cell activation	0.153873	1
biological_process	GO:0001960	negative regulation of cytokine-mediated signaling pathway	0.155699	1
biological_process	GO:0150076	neuroinflammatory response	0.155699	1
biological_process	GO:1901214	regulation of neuron death	0.15623	1
biological_process	GO:0006898	receptor-mediated endocytosis	0.157017	1
biological_process	GO:0006826	iron ion transport	0.157606	1
biological_process	GO:0042310	vasoconstriction	0.157606	1
biological_process	GO:0031098	stress-activated protein kinase signaling cascade	0.157806	1
molecular_function	GO:0001618	virus receptor activity	0.158025	1
molecular_function	GO:0140272	exogenous protein binding	0.158025	1
biological_process	GO:0071407	cellular response to organic cyclic compound	0.158201	1
biological_process	GO:0031327	negative regulation of cellular biosynthetic process	0.158362	1
biological_process	GO:0010628	positive regulation of gene expression	0.159099	1
biological_process	GO:0000288	nuclear-transcribed mRNA catabolic process, deadenylation-dependent decay	0.159509	1
biological_process	GO:0031397	negative regulation of protein ubiquitination	0.159509	1
biological_process	GO:0090502	RNA phosphodiester bond hydrolysis, endonucleolytic	0.159509	1
biological_process	GO:1901224	positive regulation of NIK/NF-kappaB signaling	0.159509	1
molecular_function	GO:0003725	double-stranded RNA binding	0.159984	1
biological_process	GO:0009891	positive regulation of biosynthetic process	0.160559	1
biological_process	GO:0007204	positive regulation of cytosolic calcium ion concentration	0.160966	1
biological_process	GO:0000271	polysaccharide biosynthetic process	0.161407	1
biological_process	GO:0001910	regulation of leukocyte mediated cytotoxicity	0.161407	1
biological_process	GO:0010827	regulation of glucose transmembrane transport	0.161407	1
biological_process	GO:0021954	central nervous system neuron development	0.161407	1
biological_process	GO:0031016	pancreas development	0.161407	1
biological_process	GO:0070664	negative regulation of leukocyte proliferation	0.161407	1
biological_process	GO:0031400	negative regulation of protein modification process	0.161455	1
cellular_component	GO:0071944	cell periphery	0.161816	1
molecular_function	GO:0043130	ubiquitin binding	0.161939	1
biological_process	GO:0005975	carbohydrate metabolic process	0.162	1
biological_process	GO:0043536	positive regulation of blood vessel endothelial cell migration	0.163302	1
biological_process	GO:0045913	positive regulation of carbohydrate metabolic process	0.163302	1
biological_process	GO:0071260	cellular response to mechanical stimulus	0.163302	1
biological_process	GO:0010638	positive regulation of organelle organization	0.163637	1
cellular_component	GO:0098685	Schaffer collateral - CA1 synapse	0.164224	1
biological_process	GO:0008284	positive regulation of cell population proliferation	0.164233	1
biological_process	GO:1903311	regulation of mRNA metabolic process	0.164934	1
biological_process	GO:0008283	cell population proliferation	0.164979	1
biological_process	GO:0070509	calcium ion import	0.165192	1
biological_process	GO:0009890	negative regulation of biosynthetic process	0.166158	1
biological_process	GO:0022617	extracellular matrix disassembly	0.167078	1
biological_process	GO:0034109	homotypic cell-cell adhesion	0.167078	1
biological_process	GO:0048708	astrocyte differentiation	0.167078	1
biological_process	GO:0055072	iron ion homeostasis	0.167078	1
biological_process	GO:0060761	negative regulation of response to cytokine stimulus	0.167078	1
biological_process	GO:0110110	positive regulation of animal organ morphogenesis	0.167078	1
cellular_component	GO:0000932	P-body	0.167881	1
biological_process	GO:1901361	organic cyclic compound catabolic process	0.168579	1
biological_process	GO:0032642	regulation of chemokine production	0.16896	1
biological_process	GO:0055117	regulation of cardiac muscle contraction	0.16896	1
cellular_component	GO:0005791	rough endoplasmic reticulum	0.169703	1
biological_process	GO:0042509	regulation of tyrosine phosphorylation of STAT protein	0.170838	1
biological_process	GO:0045582	positive regulation of T cell differentiation	0.170838	1
biological_process	GO:0048145	regulation of fibroblast proliferation	0.170838	1
molecular_function	GO:0004527	exonuclease activity	0.171645	1
biological_process	GO:0032147	activation of protein kinase activity	0.172121	1
biological_process	GO:0014070	response to organic cyclic compound	0.172576	1
biological_process	GO:0002718	regulation of cytokine production involved in immune response	0.172711	1
biological_process	GO:0014910	regulation of smooth muscle cell migration	0.172711	1
biological_process	GO:0045445	myoblast differentiation	0.172711	1
biological_process	GO:0048144	fibroblast proliferation	0.172711	1
biological_process	GO:0050886	endocrine process	0.172711	1
biological_process	GO:0097756	negative regulation of blood vessel diameter	0.172711	1
biological_process	GO:0071902	positive regulation of protein serine/threonine kinase activity	0.172923	1
cellular_component	GO:0005581	collagen trimer	0.173337	1
biological_process	GO:0007010	cytoskeleton organization	0.17371	1
biological_process	GO:0045682	regulation of epidermis development	0.174581	1
biological_process	GO:0043405	regulation of MAP kinase activity	0.175333	1
molecular_function	GO:0051219	phosphoprotein binding	0.175497	1
biological_process	GO:0007260	tyrosine phosphorylation of STAT protein	0.176446	1
biological_process	GO:0030101	natural killer cell activation	0.176446	1
biological_process	GO:0042058	regulation of epidermal growth factor receptor signaling pathway	0.176446	1
biological_process	GO:0070542	response to fatty acid	0.176446	1
biological_process	GO:0009894	regulation of catabolic process	0.176581	1
biological_process	GO:0001892	embryonic placenta development	0.178307	1
biological_process	GO:0051781	positive regulation of cell division	0.178307	1
molecular_function	GO:0033613	activating transcription factor binding	0.179331	1
cellular_component	GO:0005783	endoplasmic reticulum	0.179539	1
biological_process	GO:0050829	defense response to Gram-negative bacterium	0.180164	1
biological_process	GO:0061097	regulation of protein tyrosine kinase activity	0.180164	1
biological_process	GO:0070098	chemokine-mediated signaling pathway	0.180164	1
biological_process	GO:1903321	negative regulation of protein modification by small protein conjugation or removal	0.180164	1
biological_process	GO:1903725	regulation of phospholipid metabolic process	0.180164	1
biological_process	GO:0006913	nucleocytoplasmic transport	0.18017	1
biological_process	GO:0032956	regulation of actin cytoskeleton organization	0.18017	1
molecular_function	GO:0016209	antioxidant activity	0.181242	1
biological_process	GO:0055065	metal ion homeostasis	0.181975	1
biological_process	GO:0032602	chemokine production	0.182017	1
biological_process	GO:0046427	positive regulation of receptor signaling pathway via JAK-STAT	0.182017	1
biological_process	GO:0051169	nuclear transport	0.182596	1
biological_process	GO:0032787	monocarboxylic acid metabolic process	0.18367	1
biological_process	GO:0001656	metanephros development	0.183866	1
biological_process	GO:0010717	regulation of epithelial to mesenchymal transition	0.183866	1
biological_process	GO:0043255	regulation of carbohydrate biosynthetic process	0.183866	1
biological_process	GO:0045778	positive regulation of ossification	0.183866	1
biological_process	GO:0070997	neuron death	0.184216	1
biological_process	GO:0045639	positive regulation of myeloid cell differentiation	0.185711	1
biological_process	GO:0051899	membrane depolarization	0.185711	1
biological_process	GO:0051052	regulation of DNA metabolic process	0.186651	1
biological_process	GO:0051260	protein homooligomerization	0.186651	1
biological_process	GO:0007417	central nervous system development	0.186965	1
biological_process	GO:0045833	negative regulation of lipid metabolic process	0.187552	1
biological_process	GO:1904894	positive regulation of receptor signaling pathway via STAT	0.187552	1
cellular_component	GO:0045095	keratin filament	0.187715	1
biological_process	GO:1902903	regulation of supramolecular fiber organization	0.188277	1
biological_process	GO:0006873	cellular ion homeostasis	0.188783	1
biological_process	GO:0032092	positive regulation of protein binding	0.189389	1
biological_process	GO:0046634	regulation of alpha-beta T cell activation	0.189389	1
biological_process	GO:0062207	regulation of pattern recognition receptor signaling pathway	0.189389	1
biological_process	GO:1901184	regulation of ERBB signaling pathway	0.189389	1
biological_process	GO:1901655	cellular response to ketone	0.189389	1
biological_process	GO:0001505	regulation of neurotransmitter levels	0.189905	1
biological_process	GO:0071702	organic substance transport	0.190653	1
molecular_function	GO:0003730	mRNA 3'-UTR binding	0.19073	1
biological_process	GO:0045621	positive regulation of lymphocyte differentiation	0.191221	1
biological_process	GO:0051289	protein homotetramerization	0.191221	1
biological_process	GO:0051480	regulation of cytosolic calcium ion concentration	0.191536	1
biological_process	GO:0043065	positive regulation of apoptotic process	0.191641	1
biological_process	GO:0045862	positive regulation of proteolysis	0.192351	1
biological_process	GO:0002702	positive regulation of production of molecular mediator of immune response	0.19305	1
biological_process	GO:0002832	negative regulation of response to biotic stimulus	0.19305	1
biological_process	GO:0042102	positive regulation of T cell proliferation	0.19305	1
biological_process	GO:0001666	response to hypoxia	0.193168	1
biological_process	GO:0016192	vesicle-mediated transport	0.193307	1
biological_process	GO:0043687	post-translational protein modification	0.194802	1
biological_process	GO:0008585	female gonad development	0.194875	1
biological_process	GO:1990823	response to leukemia inhibitory factor	0.194875	1
biological_process	GO:1990830	cellular response to leukemia inhibitory factor	0.194875	1
biological_process	GO:0043068	positive regulation of programmed cell death	0.196236	1
biological_process	GO:0006942	regulation of striated muscle contraction	0.196695	1
biological_process	GO:0006402	mRNA catabolic process	0.197257	1
biological_process	GO:0006885	regulation of pH	0.198512	1
biological_process	GO:0045807	positive regulation of endocytosis	0.198512	1
biological_process	GO:0050764	regulation of phagocytosis	0.198512	1
cellular_component	GO:0005796	Golgi lumen	0.200096	1
molecular_function	GO:0032182	ubiquitin-like protein binding	0.200111	1
biological_process	GO:0015837	amine transport	0.202133	1
biological_process	GO:0022600	digestive system process	0.202133	1
biological_process	GO:0070498	interleukin-1-mediated signaling pathway	0.202133	1
biological_process	GO:0032386	regulation of intracellular transport	0.202179	1
biological_process	GO:0032535	regulation of cellular component size	0.202179	1
biological_process	GO:0036293	response to decreased oxygen levels	0.202179	1
biological_process	GO:0031532	actin cytoskeleton reorganization	0.203937	1
biological_process	GO:0046545	development of primary female sexual characteristics	0.203937	1
biological_process	GO:0048259	regulation of receptor-mediated endocytosis	0.203937	1
biological_process	GO:0044093	positive regulation of molecular function	0.203974	1
cellular_component	GO:0045177	apical part of cell	0.204059	1
biological_process	GO:0001701	in utero embryonic development	0.204645	1
biological_process	GO:0051098	regulation of binding	0.204645	1
biological_process	GO:0002367	cytokine production involved in immune response	0.205738	1
biological_process	GO:0021549	cerebellum development	0.205738	1
biological_process	GO:0035335	peptidyl-tyrosine dephosphorylation	0.205738	1
biological_process	GO:0098869	cellular oxidant detoxification	0.205738	1
biological_process	GO:0051093	negative regulation of developmental process	0.207389	1
biological_process	GO:0018958	phenol-containing compound metabolic process	0.207535	1
biological_process	GO:0032091	negative regulation of protein binding	0.207535	1
molecular_function	GO:0004725	protein tyrosine phosphatase activity	0.207539	1
biological_process	GO:0050678	regulation of epithelial cell proliferation	0.208765	1
biological_process	GO:0008630	intrinsic apoptotic signaling pathway in response to DNA damage	0.209327	1
biological_process	GO:0071887	leukocyte apoptotic process	0.209327	1
biological_process	GO:0043933	protein-containing complex subunit organization	0.210192	1
biological_process	GO:0006641	triglyceride metabolic process	0.211116	1
molecular_function	GO:0005200	structural constituent of cytoskeleton	0.211228	1
molecular_function	GO:0042562	hormone binding	0.211228	1
biological_process	GO:1901575	organic substance catabolic process	0.211516	1
biological_process	GO:0048545	response to steroid hormone	0.212893	1
biological_process	GO:1901606	alpha-amino acid catabolic process	0.212901	1
biological_process	GO:0001909	leukocyte mediated cytotoxicity	0.214681	1
molecular_function	GO:0005525	GTP binding	0.214689	1
biological_process	GO:1904659	glucose transmembrane transport	0.216458	1
biological_process	GO:2000278	regulation of DNA biosynthetic process	0.216458	1
biological_process	GO:0032970	regulation of actin filament-based process	0.217031	1
biological_process	GO:0010468	regulation of gene expression	0.217301	1
molecular_function	GO:0032550	purine ribonucleoside binding	0.218102	1
biological_process	GO:0034654	nucleobase-containing compound biosynthetic process	0.218625	1
biological_process	GO:0007169	transmembrane receptor protein tyrosine kinase signaling pathway	0.219029	1
biological_process	GO:0006024	glycosaminoglycan biosynthetic process	0.22	1
molecular_function	GO:0001883	purine nucleoside binding	0.220665	1
molecular_function	GO:0032549	ribonucleoside binding	0.220665	1
biological_process	GO:0022037	metencephalon development	0.221765	1
biological_process	GO:0010959	regulation of metal ion transport	0.222007	1
biological_process	GO:0070482	response to oxygen levels	0.222007	1
biological_process	GO:0001938	positive regulation of endothelial cell proliferation	0.223526	1
biological_process	GO:0008645	hexose transmembrane transport	0.223526	1
biological_process	GO:0010906	regulation of glucose metabolic process	0.223526	1
biological_process	GO:0014902	myotube differentiation	0.223526	1
biological_process	GO:0043279	response to alkaloid	0.223526	1
biological_process	GO:0050868	negative regulation of T cell activation	0.223526	1
biological_process	GO:1903510	mucopolysaccharide metabolic process	0.223526	1
biological_process	GO:1990748	cellular detoxification	0.223526	1
biological_process	GO:0006401	RNA catabolic process	0.224499	1
biological_process	GO:0021987	cerebral cortex development	0.225284	1
biological_process	GO:0043200	response to amino acid	0.225284	1
biological_process	GO:0060964	regulation of gene silencing by miRNA	0.225284	1
cellular_component	GO:0005886	plasma membrane	0.22553	1
biological_process	GO:0010942	positive regulation of cell death	0.225563	1
molecular_function	GO:0000149	SNARE binding	0.225816	1
molecular_function	GO:0001882	nucleoside binding	0.226655	1
biological_process	GO:0003008	system process	0.226972	1
biological_process	GO:0002831	regulation of response to biotic stimulus	0.226993	1
biological_process	GO:0007015	actin filament organization	0.226993	1
biological_process	GO:0005976	polysaccharide metabolic process	0.227037	1
biological_process	GO:0015749	monosaccharide transmembrane transport	0.227037	1
biological_process	GO:0042035	regulation of cytokine biosynthetic process	0.227037	1
biological_process	GO:0045446	endothelial cell differentiation	0.227037	1
biological_process	GO:0006023	aminoglycan biosynthetic process	0.228787	1
biological_process	GO:0032963	collagen metabolic process	0.228787	1
biological_process	GO:0046660	female sex differentiation	0.228787	1
biological_process	GO:0006661	phosphatidylinositol biosynthetic process	0.230532	1
biological_process	GO:0007569	cell aging	0.230532	1
biological_process	GO:0021782	glial cell development	0.230532	1
biological_process	GO:0034219	carbohydrate transmembrane transport	0.230532	1
biological_process	GO:1900180	regulation of protein localization to nucleus	0.230532	1
biological_process	GO:0043547	positive regulation of GTPase activity	0.231155	1
molecular_function	GO:0019001	guanyl nucleotide binding	0.231801	1
molecular_function	GO:0032561	guanyl ribonucleotide binding	0.231801	1
biological_process	GO:0051153	regulation of striated muscle cell differentiation	0.232274	1
biological_process	GO:0060147	regulation of posttranscriptional gene silencing	0.232274	1
biological_process	GO:0060966	regulation of gene silencing by RNA	0.232274	1
molecular_function	GO:0004540	ribonuclease activity	0.233011	1
biological_process	GO:0006911	phagocytosis, engulfment	0.234012	1
biological_process	GO:0018130	heterocycle biosynthetic process	0.234865	1
biological_process	GO:0007173	epidermal growth factor receptor signaling pathway	0.235746	1
biological_process	GO:0070647	protein modification by small protein conjugation or removal	0.237251	1
biological_process	GO:0003014	renal system process	0.237476	1
biological_process	GO:0010508	positive regulation of autophagy	0.237476	1
biological_process	GO:0022612	gland morphogenesis	0.237476	1
biological_process	GO:0019438	aromatic compound biosynthetic process	0.237492	1
biological_process	GO:0046486	glycerolipid metabolic process	0.238662	1
biological_process	GO:0046718	viral entry into host cell	0.239203	1
biological_process	GO:0019730	antimicrobial humoral response	0.240926	1
biological_process	GO:2000113	negative regulation of cellular macromolecule biosynthetic process	0.241575	1
biological_process	GO:0042089	cytokine biosynthetic process	0.242644	1
biological_process	GO:0051928	positive regulation of calcium ion transport	0.242644	1
biological_process	GO:0008285	negative regulation of cell population proliferation	0.243581	1
biological_process	GO:0010557	positive regulation of macromolecule biosynthetic process	0.243649	1
biological_process	GO:0000041	transition metal ion transport	0.244359	1
biological_process	GO:0014013	regulation of gliogenesis	0.244359	1
biological_process	GO:0042107	cytokine metabolic process	0.244359	1
biological_process	GO:0009063	cellular amino acid catabolic process	0.246071	1
biological_process	GO:0032368	regulation of lipid transport	0.246071	1
biological_process	GO:0032479	regulation of type I interferon production	0.247778	1
biological_process	GO:0045667	regulation of osteoblast differentiation	0.247778	1
molecular_function	GO:0005198	structural molecule activity	0.247956	1
biological_process	GO:0035270	endocrine system development	0.249482	1
biological_process	GO:0045727	positive regulation of translation	0.249482	1
biological_process	GO:0046887	positive regulation of hormone secretion	0.249482	1
biological_process	GO:0099024	plasma membrane invagination	0.249482	1
molecular_function	GO:0016491	oxidoreductase activity	0.249833	1
biological_process	GO:0032606	type I interferon production	0.251182	1
biological_process	GO:0051291	protein heterooligomerization	0.251182	1
biological_process	GO:0043254	regulation of protein-containing complex assembly	0.251205	1
biological_process	GO:0062012	regulation of small molecule metabolic process	0.251205	1
biological_process	GO:0006639	acylglycerol metabolic process	0.252878	1
biological_process	GO:1903038	negative regulation of leukocyte cell-cell adhesion	0.252878	1
biological_process	GO:0048608	reproductive structure development	0.25288	1
cellular_component	GO:0005777	peroxisome	0.254385	1
cellular_component	GO:0042579	microbody	0.254385	1
biological_process	GO:0006638	neutral lipid metabolic process	0.25457	1
biological_process	GO:0050671	positive regulation of lymphocyte proliferation	0.25457	1
biological_process	GO:0006816	calcium ion transport	0.255392	1
biological_process	GO:0061458	reproductive system development	0.255392	1
molecular_function	GO:0004519	endonuclease activity	0.255948	1
cellular_component	GO:0031967	organelle envelope	0.256101	1
cellular_component	GO:0031975	envelope	0.256101	1
biological_process	GO:0032946	positive regulation of mononuclear cell proliferation	0.256259	1
molecular_function	GO:0002020	protease binding	0.257684	1
biological_process	GO:0003158	endothelium development	0.257944	1
biological_process	GO:0055076	transition metal ion homeostasis	0.259625	1
biological_process	GO:0071333	cellular response to glucose stimulus	0.259625	1
molecular_function	GO:0004175	endopeptidase activity	0.26023	1
biological_process	GO:0044409	entry into host	0.261303	1
biological_process	GO:0016070	RNA metabolic process	0.262108	1
biological_process	GO:0001889	liver development	0.262976	1
biological_process	GO:0010324	membrane invagination	0.262976	1
biological_process	GO:0071331	cellular response to hexose stimulus	0.262976	1
biological_process	GO:0045859	regulation of protein kinase activity	0.263073	1
molecular_function	GO:0005178	integrin binding	0.26459	1
biological_process	GO:0071326	cellular response to monosaccharide stimulus	0.264647	1
molecular_function	GO:0043021	ribonucleoprotein complex binding	0.266307	1
biological_process	GO:0006958	complement activation, classical pathway	0.266313	1
biological_process	GO:0010675	regulation of cellular carbohydrate metabolic process	0.266313	1
biological_process	GO:0046425	regulation of receptor signaling pathway via JAK-STAT	0.266313	1
biological_process	GO:0098754	detoxification	0.266313	1
biological_process	GO:0048285	organelle fission	0.267967	1
biological_process	GO:0051186	cofactor metabolic process	0.267967	1
biological_process	GO:0008584	male gonad development	0.267976	1
biological_process	GO:0061008	hepaticobiliary system development	0.267976	1
biological_process	GO:0006812	cation transport	0.268142	1
cellular_component	GO:0005635	nuclear envelope	0.268656	1
biological_process	GO:0002700	regulation of production of molecular mediator of immune response	0.269635	1
biological_process	GO:0007586	digestion	0.269635	1
biological_process	GO:0046546	development of primary male sexual characteristics	0.269635	1
biological_process	GO:0050715	positive regulation of cytokine secretion	0.269635	1
biological_process	GO:0070665	positive regulation of leukocyte proliferation	0.269635	1
biological_process	GO:0046330	positive regulation of JNK cascade	0.27129	1
biological_process	GO:0060048	cardiac muscle contraction	0.27129	1
biological_process	GO:1903364	positive regulation of cellular protein catabolic process	0.27129	1
biological_process	GO:0051128	regulation of cellular component organization	0.27206	1
biological_process	GO:0001837	epithelial to mesenchymal transition	0.272942	1
biological_process	GO:0062013	positive regulation of small molecule metabolic process	0.272942	1
molecular_function	GO:0016779	nucleotidyltransferase activity	0.273134	1
molecular_function	GO:0019838	growth factor binding	0.273134	1
biological_process	GO:0008277	regulation of G protein-coupled receptor signaling pathway	0.27459	1
biological_process	GO:0038127	ERBB signaling pathway	0.27459	1
biological_process	GO:0050871	positive regulation of B cell activation	0.27459	1
biological_process	GO:0072006	nephron development	0.27459	1
biological_process	GO:0006874	cellular calcium ion homeostasis	0.275515	1
biological_process	GO:0033036	macromolecule localization	0.275732	1
molecular_function	GO:0044877	protein-containing complex binding	0.275893	1
biological_process	GO:0006606	protein import into nucleus	0.276234	1
biological_process	GO:0071322	cellular response to carbohydrate stimulus	0.277875	1
biological_process	GO:1902107	positive regulation of leukocyte differentiation	0.277875	1
biological_process	GO:1901362	organic cyclic compound biosynthetic process	0.278375	1
biological_process	GO:0071901	negative regulation of protein serine/threonine kinase activity	0.279512	1
molecular_function	GO:0045182	translation regulator activity	0.2799	1
biological_process	GO:0045834	positive regulation of lipid metabolic process	0.281146	1
biological_process	GO:1904892	regulation of receptor signaling pathway via STAT	0.281146	1
biological_process	GO:0002262	myeloid cell homeostasis	0.282775	1
biological_process	GO:0010212	response to ionizing radiation	0.282775	1
biological_process	GO:0043524	negative regulation of neuron apoptotic process	0.282775	1
biological_process	GO:0008643	carbohydrate transport	0.284402	1
biological_process	GO:0009267	cellular response to starvation	0.286024	1
biological_process	GO:0051092	positive regulation of NF-kappaB transcription factor activity	0.286024	1
biological_process	GO:0055074	calcium ion homeostasis	0.286416	1
biological_process	GO:0002455	humoral immune response mediated by circulating immunoglobulin	0.287643	1
biological_process	GO:0008360	regulation of cell shape	0.287643	1
biological_process	GO:0000187	activation of MAPK activity	0.290871	1
biological_process	GO:0001678	cellular glucose homeostasis	0.290871	1
biological_process	GO:0001890	placenta development	0.290871	1
biological_process	GO:0030902	hindbrain development	0.290871	1
biological_process	GO:0034250	positive regulation of cellular amide metabolic process	0.290871	1
biological_process	GO:0000122	negative regulation of transcription by RNA polymerase II	0.292077	1
cellular_component	GO:0110165	cellular anatomical entity	0.292565	1
biological_process	GO:0043087	regulation of GTPase activity	0.29312	1
biological_process	GO:0070838	divalent metal ion transport	0.29312	1
biological_process	GO:0055067	monovalent inorganic cation homeostasis	0.294084	1
biological_process	GO:0061025	membrane fusion	0.294084	1
biological_process	GO:0090501	RNA phosphodiester bond hydrolysis	0.294084	1
biological_process	GO:0060968	regulation of gene silencing	0.295685	1
biological_process	GO:0030856	regulation of epithelial cell differentiation	0.297283	1
biological_process	GO:0042129	regulation of T cell proliferation	0.297283	1
biological_process	GO:0043535	regulation of blood vessel endothelial cell migration	0.297283	1
biological_process	GO:0043271	negative regulation of ion transport	0.298877	1
biological_process	GO:0072511	divalent inorganic cation transport	0.298981	1
biological_process	GO:0007259	receptor signaling pathway via JAK-STAT	0.302055	1
biological_process	GO:0007519	skeletal muscle tissue development	0.303638	1
biological_process	GO:0046661	male sex differentiation	0.303638	1
biological_process	GO:0072503	cellular divalent inorganic cation homeostasis	0.304836	1
biological_process	GO:0045931	positive regulation of mitotic cell cycle	0.308368	1
biological_process	GO:0051170	import into nucleus	0.308368	1
biological_process	GO:0071705	nitrogen compound transport	0.309778	1
biological_process	GO:0044271	cellular nitrogen compound biosynthetic process	0.309798	1
biological_process	GO:0031667	response to nutrient levels	0.309849	1
biological_process	GO:0007088	regulation of mitotic nuclear division	0.309938	1
biological_process	GO:0043549	regulation of kinase activity	0.311367	1
biological_process	GO:0034645	cellular macromolecule biosynthetic process	0.311782	1
biological_process	GO:0018193	peptidyl-amino acid modification	0.313758	1
biological_process	GO:0051302	regulation of cell division	0.316181	1
biological_process	GO:0021543	pallium development	0.317734	1
biological_process	GO:0051100	negative regulation of binding	0.317734	1
biological_process	GO:0060538	skeletal muscle organ development	0.317734	1
biological_process	GO:0097696	receptor signaling pathway via STAT	0.317734	1
molecular_function	GO:0005488	binding	0.318421	1
molecular_function	GO:0042803	protein homodimerization activity	0.320536	1
biological_process	GO:0006937	regulation of muscle contraction	0.320828	1
biological_process	GO:0072507	divalent inorganic cation homeostasis	0.321521	1
biological_process	GO:0051262	protein tetramerization	0.32237	1
biological_process	GO:0015031	protein transport	0.323424	1
cellular_component	GO:0019866	organelle inner membrane	0.323785	1
biological_process	GO:0046488	phosphatidylinositol metabolic process	0.325444	1
molecular_function	GO:0008201	heparin binding	0.325569	1
biological_process	GO:0030001	metal ion transport	0.326348	1
biological_process	GO:0120032	regulation of plasma membrane bounded cell projection assembly	0.326975	1
biological_process	GO:1901652	response to peptide	0.327343	1
biological_process	GO:0001936	regulation of endothelial cell proliferation	0.328504	1
biological_process	GO:0090316	positive regulation of intracellular protein transport	0.328504	1
biological_process	GO:0006941	striated muscle contraction	0.330029	1
biological_process	GO:0043488	regulation of mRNA stability	0.330029	1
biological_process	GO:0048469	cell maturation	0.330029	1
biological_process	GO:0060491	regulation of cell projection assembly	0.330029	1
biological_process	GO:0044089	positive regulation of cellular component biogenesis	0.331494	1
biological_process	GO:0022406	membrane docking	0.33155	1
biological_process	GO:1901565	organonitrogen compound catabolic process	0.333007	1
biological_process	GO:0006611	protein export from nucleus	0.333069	1
biological_process	GO:0030177	positive regulation of Wnt signaling pathway	0.333069	1
biological_process	GO:0051099	positive regulation of binding	0.333069	1
biological_process	GO:0043534	blood vessel endothelial cell migration	0.334583	1
biological_process	GO:0042127	regulation of cell population proliferation	0.334998	1
biological_process	GO:0009991	response to extracellular stimulus	0.336467	1
biological_process	GO:0045860	positive regulation of protein kinase activity	0.337295	1
biological_process	GO:0051493	regulation of cytoskeleton organization	0.338123	1
biological_process	GO:0015833	peptide transport	0.338317	1
biological_process	GO:0021953	central nervous system neuron differentiation	0.339108	1
biological_process	GO:0043123	positive regulation of I-kappaB kinase/NF-kappaB signaling	0.339108	1
biological_process	GO:0043487	regulation of RNA stability	0.339108	1
biological_process	GO:1903827	regulation of cellular protein localization	0.339777	1
biological_process	GO:0043409	negative regulation of MAPK cascade	0.340609	1
biological_process	GO:0046328	regulation of JNK cascade	0.342107	1
biological_process	GO:1901343	negative regulation of vasculature development	0.345094	1
molecular_function	GO:0004721	phosphoprotein phosphatase activity	0.3458	1
biological_process	GO:0051783	regulation of nuclear division	0.346582	1
biological_process	GO:0051641	cellular localization	0.348707	1
biological_process	GO:0022411	cellular component disassembly	0.348856	1
biological_process	GO:0001935	endothelial cell proliferation	0.351027	1
biological_process	GO:0042594	response to starvation	0.351027	1
biological_process	GO:0042886	amide transport	0.351224	1
biological_process	GO:0017038	protein import	0.352502	1
biological_process	GO:1901136	carbohydrate derivative catabolic process	0.352502	1
biological_process	GO:0002377	immunoglobulin production	0.353973	1
biological_process	GO:1901654	response to ketone	0.353973	1
biological_process	GO:0009059	macromolecule biosynthetic process	0.355224	1
biological_process	GO:0051168	nuclear export	0.355442	1
biological_process	GO:0071897	DNA biosynthetic process	0.358369	1
biological_process	GO:0009749	response to glucose	0.359828	1
molecular_function	GO:0000978	RNA polymerase II cis-regulatory region sequence-specific DNA binding	0.360621	1
biological_process	GO:0045184	establishment of protein localization	0.362098	1
biological_process	GO:0051253	negative regulation of RNA metabolic process	0.364918	1
biological_process	GO:0009746	response to hexose	0.367073	1
biological_process	GO:0050852	T cell receptor signaling pathway	0.367073	1
biological_process	GO:0030278	regulation of ossification	0.368512	1
biological_process	GO:0072594	establishment of protein localization to organelle	0.369346	1
biological_process	GO:0002573	myeloid leukocyte differentiation	0.369949	1
biological_process	GO:0031396	regulation of protein ubiquitination	0.369949	1
biological_process	GO:0034764	positive regulation of transmembrane transport	0.369949	1
biological_process	GO:1901605	alpha-amino acid metabolic process	0.369949	1
biological_process	GO:0033674	positive regulation of kinase activity	0.370975	1
biological_process	GO:0030100	regulation of endocytosis	0.371382	1
cellular_component	GO:0012505	endomembrane system	0.371524	1
cellular_component	GO:0036464	cytoplasmic ribonucleoprotein granule	0.372081	1
molecular_function	GO:0046983	protein dimerization activity	0.372176	1
biological_process	GO:0009056	catabolic process	0.372638	1
biological_process	GO:0034284	response to monosaccharide	0.374238	1
biological_process	GO:0071456	cellular response to hypoxia	0.374238	1
cellular_component	GO:0005882	intermediate filament	0.374847	1
biological_process	GO:0016051	carbohydrate biosynthetic process	0.375662	1
biological_process	GO:0050670	regulation of lymphocyte proliferation	0.375662	1
molecular_function	GO:0000987	cis-regulatory region sequence-specific DNA binding	0.375749	1
molecular_function	GO:0035326	cis-regulatory region binding	0.375749	1
biological_process	GO:0051338	regulation of transferase activity	0.376277	1
biological_process	GO:0032944	regulation of mononuclear cell proliferation	0.377082	1
biological_process	GO:0006875	cellular metal ion homeostasis	0.377478	1
biological_process	GO:0009612	response to mechanical stimulus	0.378499	1
[truncated: 20,752 more rows]
